# Supplementary material for: Multiplex enhancer-reporter assays uncover unsophisticated TP53 enhancer logic
Source: HighWire-hosted journal article supplement (doi:10.1101/gr.204149.116), 2016-05-18
Supplement: Supplemental_Tables_S1-S5andS8.zip [file Supplemental_Table_S1.xlsx]

## Sheet: CHEQ-seq regions
region information							overlap with designed regions						overlap with in-house called p53 ChIP peaks
ID	Chr	start	stop	Barcodes	expression	padj	Name designed region	chr	start	stop	# bp overlap	% overlap	peak name	chr	start	stop	score	summit of peak	% overlap
chrX-4629122-4629621	chrX	4629122	4629621	ACGCTAGTGGAGAGTGG	0.570525	0.159392	MACS_peak_3574	chrX	4628588	4629138	16	2.90909	MACS_peak_3574	chrX	4628539	4629186	458.98	chrX-4629122-4629621	9.89181
chr17-59700768-59701674	chr17	59700768	59701674	AAGGATTGTCGATAAGT;GCTGGATTTTGCGTTGG	0.614969	0.0117101	MACS_peak_1334	chr17	59698351	59700851	83	3.32	MACS_peak_1334	chr17	59698322	59700879	82.32	chr17-59700768-59701674	4.34102
chr20-53395231-53396164	chr20	53395231	53396164	GCCCGAGGGCCACCGGT	0.103188	0.91005	MACS_peak_1960	chr20	53396079	53398079	85	4.25	MACS_peak_1960	chr20	53396048	53398110	79.03	chr20-53395231-53396164	5.62561
chr17-59700743-59701532	chr17	59700743	59701532	ATATGGAGTTCCTTTGG	0.10418	0.81393	MACS_peak_1334	chr17	59698351	59700851	108	4.32	MACS_peak_1334	chr17	59698322	59700879	82.32	chr17-59700743-59701532	5.31873
chr12-18503034-18503620	chr12	18503034	18503620	AGACTCGCCCGGATAAA	0.635488	0.101582	MACS_peak_618	chr12	18502557	18503057	23	4.6	no_overlap	.	.	.	.	.	.
chr17-59700715-59701188	chr17	59700715	59701188	GGCCAGCAGCCCAACGG	0.11965	0.792034	MACS_peak_1334	chr17	59698351	59700851	136	5.44	MACS_peak_1334	chr17	59698322	59700879	82.32	chr17-59700715-59701188	6.41377
chr17-59700709-59701131	chr17	59700709	59701131	GGAGCTAGGGCTGTGAC	0.310601	0.552283	MACS_peak_1334	chr17	59698351	59700851	142	5.68	MACS_peak_1334	chr17	59698322	59700879	82.32	chr17-59700709-59701131	6.64842
chr17-59697985-59698504	chr17	59697985	59698504	GGATGCACAGGATCTGA	0.352326	0.237636	MACS_peak_1334	chr17	59698351	59700851	153	6.12	MACS_peak_1334	chr17	59698322	59700879	82.32	chr17-59697985-59698504	7.11772
chr3-63995025-63995639	chr3	63995025	63995639	ATCGAATCGAGGTGGTC	-0.203077	0.545134	MACS_peak_2121	chr3	63995558	63996858	81	6.23077	MACS_peak_2121	chr3	63995518	63996897	66.06	chr3-63995025-63995639	8.77447
chr17-59362858-59363446	chr17	59362858	59363446	CGGGGCATGGAGCGCGT	6.64656e-05	0.999791	MACS_peak_1330	chr17	59361548	59362948	90	6.42857	MACS_peak_1330	chr17	59361518	59362977	204.92	chr17-59362858-59363446	8.15627
chr17-59697558-59698512	chr17	59697558	59698512	TAGGTTGGATTGGTGGA	-0.971724	0.0816227	MACS_peak_1334	chr17	59698351	59700851	161	6.44	MACS_peak_1334	chr17	59698322	59700879	82.32	chr17-59697558-59698512	7.43058
chr20-53059955-53060164	chr20	53059955	53060164	AGGAGTTACTCGAAGTG	0.379167	0.27498	MACS_peak_1956	chr20	53057263	53060463	209	6.53125	MACS_peak_1956	chr20	53057217	53060508	138.64	chr20-53059955-53060164	6.35065
chr17-59362854-59363495	chr17	59362854	59363495	TGGCGGCTCGCAATGGC	0.107773	0.793507	MACS_peak_1330	chr17	59361548	59362948	94	6.71429	MACS_peak_1330	chr17	59361518	59362977	204.92	chr17-59362854-59363495	8.43043
chr6-106545365-106546154	chr6	106545365	106546154	AGGCTGTAATTTGTTGG	0.408373	0.250145	MACS_peak_3011	chr6	106546119	106546619	35	7	MACS_peak_3011	chr6	106546107	106546631	153.53	chr6-106545365-106546154	8.96947
chr17-59826029-59826645	chr17	59826029	59826645	TTCGGGATTAACATGAA	-0.603604	0.0281887	MACS_peak_1341	chr17	59826452	59829202	193	7.01818	MACS_peak_1341	chr17	59826412	59829241	63.66	chr17-59826029-59826645	8.23613
chr10-67178679-67178892	chr10	67178679	67178892	GCACGTGCGACCGGGGT	1.64064	0.00209994	MACS_peak_366	chr10	67178856	67179356	36	7.2	no_overlap	.	.	.	.	.	.
chr17-59829002-59829579	chr17	59829002	59829579	GGTTCGTTTGCTAAGCT	0.0629066	0.928077	MACS_peak_1341	chr17	59826452	59829202	200	7.27273	MACS_peak_1341	chr17	59826412	59829241	63.66	chr17-59829002-59829579	8.44821
chr17-59697538-59698534	chr17	59697538	59698534	TCGAGCCTACGCGTAGT	-1.08669	0.0314215	MACS_peak_1334	chr17	59698351	59700851	183	7.32	MACS_peak_1334	chr17	59698322	59700879	82.32	chr17-59697538-59698534	8.29097
chr17-59826007-59826654	chr17	59826007	59826654	CTGTGTTTGAGAATTTC	-0.326517	0.227728	MACS_peak_1341	chr17	59826452	59829202	202	7.34545	MACS_peak_1341	chr17	59826412	59829241	63.66	chr17-59826007-59826654	8.55426
chr3-63995110-63995655	chr3	63995110	63995655	GTGCGAGCGGGCGAGAA	0.0731726	0.888347	MACS_peak_2121	chr3	63995558	63996858	97	7.46154	MACS_peak_2121	chr3	63995518	63996897	66.06	chr3-63995110-63995655	9.93474
chr20-53366288-53366753	chr20	53366288	53366753	CACGGGAAGGTAGGCGA	0.275167	0.551505	MACS_peak_1959	chr20	53365088	53366388	100	7.69231	MACS_peak_1959	chr20	53365044	53366431	65.2	chr20-53366288-53366753	10.31
chr20-53058403-53058650	chr20	53058403	53058650	GAGGCGGTCATAACAAG	-1.40482	0.00623201	MACS_peak_1956	chr20	53057263	53060463	247	7.71875	MACS_peak_1956	chr20	53057217	53060508	138.64	chr20-53058403-53058650	7.50532
chr20-29647498-29648077	chr20	29647498	29648077	GTCCATGTGGGGCTCTG	0.0247075	0.968347	MACS_peak_1925	chr20	29648038	29648538	39	7.8	MACS_peak_1925	chr20	29647999	29648576	66.67	chr20-29647498-29648077	13.5182
chr17-59826141-59826667	chr17	59826141	59826667	TAAAGCATAGCTCACTA	-0.619035	0.0398995	MACS_peak_1341	chr17	59826452	59829202	215	7.81818	MACS_peak_1341	chr17	59826412	59829241	63.66	chr17-59826141-59826667	9.01379
chr20-53059634-53059894	chr20	53059634	53059894	GTCCGGGTCGTTAAAGT	0.232023	0.45663	MACS_peak_1956	chr20	53057263	53060463	260	8.125	MACS_peak_1956	chr20	53057217	53060508	138.64	chr20-53059634-53059894	7.90033
chr20-53058756-53059017	chr20	53058756	53059017	TTTTCAGTCAAGGTAGG	-0.309037	0.492458	MACS_peak_1956	chr20	53057263	53060463	261	8.15625	MACS_peak_1956	chr20	53057217	53060508	138.64	chr20-53058756-53059017	7.93072
chr20-53058973-53059235	chr20	53058973	53059235	GGGGGGTCGAGGGCCCG	-0.103671	0.823672	MACS_peak_1956	chr20	53057263	53060463	262	8.1875	MACS_peak_1956	chr20	53057217	53060508	138.64	chr20-53058973-53059235	7.96111
chr17-59827606-59827832	chr17	59827606	59827832	CCTGGGAGGGGGCCAGA	-0.219381	0.714396	MACS_peak_1341	chr17	59826452	59829202	226	8.21818	MACS_peak_1341	chr17	59826412	59829241	63.66	chr17-59827606-59827832	7.98869
chr9-139445513-139446053	chr9	139445513	139446053	TCGTGCATTCGGAGGGA	0.902952	0.134144	MACS_peak_3567	chr9	139444642	139445592	79	8.31579	MACS_peak_3567	chr9	139444606	139445627	833.5	chr9-139445513-139446053	11.1655
chr17-59700643-59701234	chr17	59700643	59701234	AAAGGGTATTGGTGGCG;GGGAGTTGGCTCAAGGA	-0.00625459	0.999741	MACS_peak_1334	chr17	59698351	59700851	208	8.32	MACS_peak_1334	chr17	59698322	59700879	82.32	chr17-59700643-59701234	9.22957
chr17-59698053-59698563	chr17	59698053	59698563	TGCGACCGTTGTATAGT;GTGGATTCTTTAGTTAG	-0.418725	0.543615	MACS_peak_1334	chr17	59698351	59700851	212	8.48	MACS_peak_1334	chr17	59698322	59700879	82.32	chr17-59698053-59698563	9.42511
chr8-128808351-128809266	chr8	128808351	128809266	GTAAGCTGAGGAGCCTG;GGGGGTGGCTGCCAGAG	-1.13804	0.00265349	MACS_peak_3412	chr8	128807345	128808445	94	8.54545	MACS_peak_3412	chr8	128807314	128808476	189.13	chr8-128808351-128809266	10.7573
chr3-64822764-64823375	chr3	64822764	64823375	TCCGCGCGAAGGATCGC	0.312562	0.554267	MACS_peak_2123	chr3	64821118	64822918	154	8.55556	MACS_peak_2123	chr3	64821081	64822955	121.49	chr3-64822764-64823375	10.1921
chr15-52956260-52956975	chr15	52956260	52956975	GGGGGCGACCGACGGGG	-0.224644	0.745961	MACS_peak_1031	chr15	52955666	52956316	56	8.61538	MACS_peak_1031	chr15	52955639	52956342	193.94	chr15-52956260-52956975	11.6643
chr17-59827474-59827714	chr17	59827474	59827714	GGAGGTGTCAGGGTCGG;ATTGGGATGGAATTAGA	-0.0729566	0.251097	MACS_peak_1341	chr17	59826452	59829202	240	8.72727	MACS_peak_1341	chr17	59826412	59829241	63.66	chr17-59827474-59827714	8.48356
chr17-59362825-59363513	chr17	59362825	59363513	TGAGGGCAGGGGGATTG	-0.341298	0.647089	MACS_peak_1330	chr17	59361548	59362948	123	8.78571	MACS_peak_1330	chr17	59361518	59362977	204.92	chr17-59362825-59363513	10.4181
chr5-40569152-40569414	chr5	40569152	40569414	TGGCTGATTGTTATACG	0.0857006	0.8843	MACS_peak_2486	chr5	40568696	40569196	44	8.8	MACS_peak_2486	chr5	40568700	40569192	154.46	chr5-40569152-40569414	8.13008
chr20-53366271-53366961	chr20	53366271	53366961	TAAGAACGCGGGGCGGG	-0.399373	0.429203	MACS_peak_1959	chr20	53365088	53366388	117	9	MACS_peak_1959	chr20	53365044	53366431	65.2	chr20-53366271-53366961	11.5357
chr17-59828600-59828851	chr17	59828600	59828851	CAGTATCATCTGTGTGG	-0.252356	0.676067	MACS_peak_1341	chr17	59826452	59829202	251	9.12727	MACS_peak_1341	chr17	59826412	59829241	63.66	chr17-59828600-59828851	8.87239
chr17-59826108-59826704	chr17	59826108	59826704	CGTGATGCTTATAACGT	-0.288542	0.670671	MACS_peak_1341	chr17	59826452	59829202	252	9.16364	MACS_peak_1341	chr17	59826412	59829241	63.66	chr17-59826108-59826704	10.3217
chr20-52937712-52938361	chr20	52937712	52938361	ACACCCGTGGAGTGGGA	-0.182777	0.795228	MACS_peak_1954	chr20	52937123	52937773	61	9.38462	MACS_peak_1954	chr20	52937097	52937798	63.93	chr20-52937712-52938361	12.2682
chr17-59700612-59701169	chr17	59700612	59701169	TCATCGGGTAGACGTTG;AGCCCCCCCCAACAGGA	0.167071	0.859613	MACS_peak_1334	chr17	59698351	59700851	239	9.56	MACS_peak_1334	chr17	59698322	59700879	82.32	chr17-59700612-59701169	10.4419
chr5-42963950-42964797	chr5	42963950	42964797	TGCAGCTAGCAAAGGAT	-0.189573	0.60488	MACS_peak_2524	chr5	42963499	42963999	49	9.8	MACS_peak_2524	chr5	42963547	42963951	66.21	chr5-42963950-42964797	0.247525
chr17-59697981-59698596	chr17	59697981	59698596	TTTTGACGGTGATAAGG	-0.184651	0.668304	MACS_peak_1334	chr17	59698351	59700851	245	9.8	MACS_peak_1334	chr17	59698322	59700879	82.32	chr17-59697981-59698596	10.7157
chr12-70913691-70914719	chr12	70913691	70914719	GCGTTGCCAATGGACCA	-0.0638949	0.888394	MACS_peak_699	chr12	70914670	70915170	49	9.8	MACS_peak_699	chr12	70914678	70915162	156.36	chr12-70913691-70914719	8.47107
chr17-59697999-59698597	chr17	59697999	59698597	GCACTAATCGAGGTGCT	-0.594431	0.0923881	MACS_peak_1334	chr17	59698351	59700851	246	9.84	MACS_peak_1334	chr17	59698322	59700879	82.32	chr17-59697999-59698597	10.7548
chr17-59700604-59701362	chr17	59700604	59701362	CCGGGGTAGGAGGTGGG	-0.0205346	0.972309	MACS_peak_1334	chr17	59698351	59700851	247	9.88	MACS_peak_1334	chr17	59698322	59700879	82.32	chr17-59700604-59701362	10.7548
chr3-64820784-64821301	chr3	64820784	64821301	CGGCGGATGTGAGTGAT;GGTGGAGGATTAGCTGG	0.879615	0.00185825	MACS_peak_2123	chr3	64821118	64822918	183	10.1667	MACS_peak_2123	chr3	64821081	64822955	121.49	chr3-64820784-64821301	11.7396
chr17-59698530-59698785	chr17	59698530	59698785	GTGGTCGTACTGCCCCA	0.259351	0.665366	MACS_peak_1334	chr17	59698351	59700851	255	10.2	MACS_peak_1334	chr17	59698322	59700879	82.32	chr17-59698530-59698785	9.97262
chr17-59698017-59698607	chr17	59698017	59698607	AAGGGGGGATAGTCAGG	-0.282082	0.707915	MACS_peak_1334	chr17	59698351	59700851	256	10.24	MACS_peak_1334	chr17	59698322	59700879	82.32	chr17-59698017-59698607	11.1459
chr3-64822733-64823554	chr3	64822733	64823554	GTTCCCCGCGACCCGCG	0.724226	0.00250851	MACS_peak_2123	chr3	64821118	64822918	185	10.2778	MACS_peak_2123	chr3	64821081	64822955	121.49	chr3-64822733-64823554	11.8463
chr20-53395342-53396288	chr20	53395342	53396288	CGTAAGTGTTGGGCCGG;TTAGGTGATAAGGGATA	-0.502764	0.143766	MACS_peak_1960	chr20	53396079	53398079	209	10.45	MACS_peak_1960	chr20	53396048	53398110	79.03	chr20-53395342-53396288	11.6392
chr20-53397366-53397576	chr20	53397366	53397576	TGTAGCGTGCGGCAGCC	0.112095	0.744827	MACS_peak_1960	chr20	53396079	53398079	210	10.5	MACS_peak_1960	chr20	53396048	53398110	79.03	chr20-53397366-53397576	10.1843
chr17-59700120-59700385	chr17	59700120	59700385	GGGTACGAACCGAATAA	0.133636	0.82946	MACS_peak_1334	chr17	59698351	59700851	265	10.6	MACS_peak_1334	chr17	59698322	59700879	82.32	chr17-59700120-59700385	10.3637
chr1-150938616-150939465	chr1	150938616	150939465	AGTGAGAAACGGAGAAA	-0.459945	0.282836	MACS_peak_130	chr1	150938169	150938669	53	10.6	MACS_peak_130	chr1	150938125	150938712	75.65	chr1-150938616-150939465	16.3543
chr17-59700120-59700386	chr17	59700120	59700386	CTGGCTGAGGTGCATGC	0.67542	0.00503697	MACS_peak_1334	chr17	59698351	59700851	266	10.64	MACS_peak_1334	chr17	59698322	59700879	82.32	chr17-59700120-59700386	10.4028
chr17-59700584-59701648	chr17	59700584	59701648	AGAGGGACGAGGGGCCC	0.438829	0.0565248	MACS_peak_1334	chr17	59698351	59700851	267	10.68	MACS_peak_1334	chr17	59698322	59700879	82.32	chr17-59700584-59701648	11.537
chr17-59698063-59698619	chr17	59698063	59698619	ACACCTAGGCGAGTCAA	-0.487971	0.504604	MACS_peak_1334	chr17	59698351	59700851	268	10.72	MACS_peak_1334	chr17	59698322	59700879	82.32	chr17-59698063-59698619	11.6152
chr17-59700579-59701152	chr17	59700579	59701152	CTCTTTCTGTCGGGCTA	0.179249	0.680218	MACS_peak_1334	chr17	59698351	59700851	272	10.88	MACS_peak_1334	chr17	59698322	59700879	82.32	chr17-59700579-59701152	11.7325
chr17-55600761-55601276	chr17	55600761	55601276	GTGGACGACCTAACGGA	-0.212957	0.791951	MACS_peak_1310	chr17	55601204	55601854	72	11.0769	MACS_peak_1310	chr17	55601163	55601894	613.8	chr17-55600761-55601276	15.4583
chr20-53057253-53057618	chr20	53057253	53057618	CTGGTGAGGGTGCCGGA	0.298658	0.293557	MACS_peak_1956	chr20	53057263	53060463	355	11.0938	MACS_peak_1956	chr20	53057217	53060508	138.64	chr20-53057253-53057618	11.0909
chr20-53059594-53059949	chr20	53059594	53059949	GGGGGCAGCGTATAGGG	-0.207116	0.815662	MACS_peak_1956	chr20	53057263	53060463	355	11.0938	MACS_peak_1956	chr20	53057217	53060508	138.64	chr20-53059594-53059949	10.787
chr3-63996713-63997348	chr3	63996713	63997348	GTCAATGCAGTATTAGG	0.134156	0.776852	MACS_peak_2121	chr3	63995558	63996858	145	11.1538	MACS_peak_2121	chr3	63995518	63996897	66.06	chr3-63996713-63997348	13.343
chr3-64822717-64823300	chr3	64822717	64823300	CGGGAGTGTGGGGCAGG	0.121076	0.911	MACS_peak_2123	chr3	64821118	64822918	201	11.1667	MACS_peak_2123	chr3	64821081	64822955	121.49	chr3-64822717-64823300	12.7001
chr17-59698082-59698631	chr17	59698082	59698631	GCGGGGTCTTTGCGAGT;GGTGTTGGCAGGGTGAC	-0.139693	0.0143479	MACS_peak_1334	chr17	59698351	59700851	280	11.2	MACS_peak_1334	chr17	59698322	59700879	82.32	chr17-59698082-59698631	12.0845
chr9-128974104-128975084	chr9	128974104	128975084	AGAAGAGTGAGGTGCCG;TGAGTAGGTAGGGGCGG	0.0112699	0.962213	MACS_peak_3556	chr9	128973660	128974160	56	11.2	no_overlap	.	.	.	.	.	.
chr20-52936539-52937196	chr20	52936539	52937196	GTATAACCTTGCCCTGC;TGCCTGCCGGGCGACAC	-0.539144	0.0376716	MACS_peak_1954	chr20	52937123	52937773	73	11.2308	MACS_peak_1954	chr20	52937097	52937798	63.93	chr20-52936539-52937196	14.1227
chr20-46620616-46621422	chr20	46620616	46621422	CGCTTGTTACAGTACGC	0.468732	0.377616	MACS_peak_1946	chr20	46621298	46622398	124	11.2727	MACS_peak_1946	chr20	46621272	46622423	730.37	chr20-46620616-46621422	13.0321
chr17-59755454-59755674	chr17	59755454	59755674	GTGGAGGTGAGGATCGC	0.28332	0.260245	MACS_peak_1338	chr17	59755395	59757345	220	11.2821	MACS_peak_1338	chr17	59755362	59757378	75.13	chr17-59755454-59755674	10.9127
chr17-59623567-59623785	chr17	59623567	59623785	CACGTGCCGACAAGGCG	-0.830789	0.0125615	MACS_peak_1332	chr17	59623655	59624805	130	11.3043	MACS_peak_1332	chr17	59623628	59624831	95.3	chr17-59623567-59623785	13.0507
chr9-98699711-98700403	chr9	98699711	98700403	TCATACGACGGGATGCC	0.229588	0.611548	MACS_peak_3496	chr9	98699268	98699768	57	11.4	MACS_peak_3496	chr9	98699253	98699783	167.92	chr9-98699711-98700403	13.5849
chr17-59700565-59701029	chr17	59700565	59701029	TACGAGAAGGCCTGGCC	0.045346	0.9536	MACS_peak_1334	chr17	59698351	59700851	286	11.44	MACS_peak_1334	chr17	59698322	59700879	82.32	chr17-59700565-59701029	12.28
chr3-64820782-64821324	chr3	64820782	64821324	GTCGGTGCCTGAGATAG	0.2524	0.541824	MACS_peak_2123	chr3	64821118	64822918	206	11.4444	MACS_peak_2123	chr3	64821081	64822955	121.49	chr3-64820782-64821324	12.9669
chr17-59698038-59698638	chr17	59698038	59698638	CCGCCGTTACCTCGATC	0.384206	0.167708	MACS_peak_1334	chr17	59698351	59700851	287	11.48	MACS_peak_1334	chr17	59698322	59700879	82.32	chr17-59698038-59698638	12.3582
chr20-53057116-53057632	chr20	53057116	53057632	TCGCGAGGTTGGATTGA	-0.0592245	0.934511	MACS_peak_1956	chr20	53057263	53060463	369	11.5312	MACS_peak_1956	chr20	53057217	53060508	138.64	chr20-53057116-53057632	12.6101
chr3-63996708-63997466	chr3	63996708	63997466	CGAGGACTATTACTACA	0.138578	0.751661	MACS_peak_2121	chr3	63995558	63996858	150	11.5385	MACS_peak_2121	chr3	63995518	63996897	66.06	chr3-63996708-63997466	13.7056
chr15-52955148-52955741	chr15	52955148	52955741	CCGTTCGGTGTTTCCTG	0.403518	0.117398	MACS_peak_1031	chr15	52955666	52956316	75	11.5385	MACS_peak_1031	chr15	52955639	52956342	193.94	chr15-52955148-52955741	14.5092
chr8-109511675-109512108	chr8	109511675	109512108	CTACTTACAGGCTTGGG	-1.81356	0.000210075	MACS_peak_3356	chr8	109511233	109511733	58	11.6	no_overlap	.	.	.	.	.	.
chr17-59704343-59704593	chr17	59704343	59704593	CGGCGAGGGGCCCGACG;AGCAAAACGGATATTGC	0.350122	0.272196	MACS_peak_1335	chr17	59703280	59705430	250	11.6279	MACS_peak_1335	chr17	59703249	59705461	147.58	chr17-59704343-59704593	11.302
chr17-59623274-59623789	chr17	59623274	59623789	CGAGCGTGGGTGAGAGG	0.185091	0.606196	MACS_peak_1332	chr17	59623655	59624805	134	11.6522	MACS_peak_1332	chr17	59623628	59624831	95.3	chr17-59623274-59623789	13.3832
chr3-63995162-63995710	chr3	63995162	63995710	AAAGCGAGTATAGAGCG	-0.419624	0.298797	MACS_peak_2121	chr3	63995558	63996858	152	11.6923	MACS_peak_2121	chr3	63995518	63996897	66.06	chr3-63995162-63995710	13.9231
chr20-53365446-53365599	chr20	53365446	53365599	GTAGAGGTGAAGGGAGG	-0.835475	0.00101743	MACS_peak_1959	chr20	53365088	53366388	153	11.7692	MACS_peak_1959	chr20	53365044	53366431	65.2	chr20-53365446-53365599	11.031
chr17-59697869-59698646	chr17	59697869	59698646	ATGGGTAATCCATAATA	-0.658928	0.158994	MACS_peak_1334	chr17	59698351	59700851	295	11.8	MACS_peak_1334	chr17	59698322	59700879	82.32	chr17-59697869-59698646	12.6711
chr3-63995199-63995712	chr3	63995199	63995712	TCGTTGCGGCAGGCCGG	0.587673	0.00813874	MACS_peak_2121	chr3	63995558	63996858	154	11.8462	MACS_peak_2121	chr3	63995518	63996897	66.06	chr3-63995199-63995712	14.0682
chr17-59700554-59701088	chr17	59700554	59701088	AAACAATGTTTTCGTAG	0.0754703	0.876019	MACS_peak_1334	chr17	59698351	59700851	297	11.88	MACS_peak_1334	chr17	59698322	59700879	82.32	chr17-59700554-59701088	12.7102
chr17-59700554-59701177	chr17	59700554	59701177	GGGGGGTGAGGCGGGAG	0.148585	0.88773	MACS_peak_1334	chr17	59698351	59700851	297	11.88	MACS_peak_1334	chr17	59698322	59700879	82.32	chr17-59700554-59701177	12.7102
chr3-64820788-64821333	chr3	64820788	64821333	GTACAGACGTCGAGGGC	0.127198	0.813995	MACS_peak_2123	chr3	64821118	64822918	215	11.9444	MACS_peak_2123	chr3	64821081	64822955	121.49	chr3-64820788-64821333	13.4472
chr17-59828187-59828516	chr17	59828187	59828516	GCGACGCGCAGCGGCCG	0.0469009	0.948233	MACS_peak_1341	chr17	59826452	59829202	329	11.9636	MACS_peak_1341	chr17	59826412	59829241	63.66	chr17-59828187-59828516	11.6296
chr17-59704961-59705219	chr17	59704961	59705219	TCTGGGACGGGGCCACC	-0.0759376	0.85178	MACS_peak_1335	chr17	59703280	59705430	258	12	MACS_peak_1335	chr17	59703249	59705461	147.58	chr17-59704961-59705219	11.6637
chr1-40040191-40041262	chr1	40040191	40041262	TGGGGATGAGGGGGGGA;CAAGGCCGAGGAGTCGC	-0.19138	0.64927	MACS_peak_39	chr1	40041202	40041702	60	12	no_overlap	.	.	.	.	.	.
chrX-141620664-141621200	chrX	141620664	141621200	GCACATCAGTCGGTCTG;GTGCGTCAGAACCTTTA	0.328494	0.469634	MACS_peak_3626	chrX	141620224	141620724	60	12	no_overlap	.	.	.	.	.	.
chr20-53396620-53396862	chr20	53396620	53396862	GTCGCAGTGAGGGGTGG	-1.00562	0.0139136	MACS_peak_1960	chr20	53396079	53398079	242	12.1	MACS_peak_1960	chr20	53396048	53398110	79.03	chr20-53396620-53396862	11.7362
chr1-144010036-144010550	chr1	144010036	144010550	TCAATATGCAGGAGAGC	-0.583927	0.107849	MACS_peak_125	chr1	144010465	144011165	85	12.1429	MACS_peak_125	chr1	144010426	144011203	496.63	chr1-144010036-144010550	15.9588
chr2-151150643-151151392	chr2	151150643	151151392	AAGTCAGTAGGATCGAG	-0.247982	0.646899	MACS_peak_1746	chr2	151150204	151150704	61	12.2	no_overlap	.	.	.	.	.	.
chr16-73447260-73447809	chr16	73447260	73447809	GTTTGGTAGGAGCGTGA	0.090726	0.903855	MACS_peak_1188	chr16	73446821	73447321	61	12.2	no_overlap	.	.	.	.	.	.
chr16-24392335-24393017	chr16	24392335	24393017	GTGCGGCCGTGTGCGGT	-1.97491	7.67833e-05	MACS_peak_1141	chr16	24392956	24393456	61	12.2	no_overlap	.	.	.	.	.	.
chr17-59703018-59703543	chr17	59703018	59703543	GGCTGTAAAGCGGGGTG;TGACTGAGCAATTACCT	-1.2868	0.0019551	MACS_peak_1335	chr17	59703280	59705430	263	12.2326	MACS_peak_1335	chr17	59703249	59705461	147.58	chr17-59703018-59703543	13.2911
chr17-59698502-59698809	chr17	59698502	59698809	ACCTACGTCCGAAACGT;AGTTGTGTCCGGTCATG	0.29276	0.625115	MACS_peak_1334	chr17	59698351	59700851	307	12.28	MACS_peak_1334	chr17	59698322	59700879	82.32	chr17-59698502-59698809	12.0063
chr20-53366227-53366703	chr20	53366227	53366703	CTAGTAGTGGACGTCAT	-0.136834	0.650323	MACS_peak_1959	chr20	53365088	53366388	161	12.3846	MACS_peak_1959	chr20	53365044	53366431	65.2	chr20-53366227-53366703	14.708
chr4-8065800-8066321	chr4	8065800	8066321	CGGTGTTGGGCTGTGGT	-0.594181	0.27092	MACS_peak_2275	chr4	8065362	8065862	62	12.4	MACS_peak_2275	chr4	8065411	8065812	89.79	chr4-8065800-8066321	2.99252
chr17-78667149-78667851	chr17	78667149	78667851	TAGCTTTGAAAGTCGTC	0.630071	0.246063	MACS_peak_1387	chr17	78667789	78668289	62	12.4	MACS_peak_1387	chr17	78667811	78668267	362.18	chr17-78667149-78667851	8.77193
chr17-59700537-59701176	chr17	59700537	59701176	CGGTAGTAATGGGTGGA	0.519683	0.0538388	MACS_peak_1334	chr17	59698351	59700851	314	12.56	MACS_peak_1334	chr17	59698322	59700879	82.32	chr17-59700537-59701176	13.375
chr11-130013555-130014098	chr11	130013555	130014098	GCCCAAATGGTACTCGT;TCAATTTATGTAAAGCT	-0.925791	2.36935e-10	MACS_peak_591	chr11	130013119	130013619	64	12.8	no_overlap	.	.	.	.	.	.
chr17-59828848-59829405	chr17	59828848	59829405	CGGGACTCCGTCCGAGG;CAGAGTCGAGGAAGGGC	0.0147058	0.869464	MACS_peak_1341	chr17	59826452	59829202	354	12.8727	MACS_peak_1341	chr17	59826412	59829241	63.66	chr17-59828848-59829405	13.8918
chr1-115259549-115260058	chr1	115259549	115260058	GGGTTCTTTCACACGGT	-0.423635	0.230649	MACS_peak_117	chr1	115259955	115260755	103	12.875	MACS_peak_117	chr1	115259914	115260796	76.41	chr1-115259549-115260058	16.3265
chr3-63996690-63997266	chr3	63996690	63997266	CCGTACGCCGCCAGAAA;CGAGTAAAGGCGTTGGC	0.309762	0.563249	MACS_peak_2121	chr3	63995558	63996858	168	12.9231	MACS_peak_2121	chr3	63995518	63996897	66.06	chr3-63996690-63997266	15.0109
chr12-81172209-81172830	chr12	81172209	81172830	GAGGTGATTAGTGTATA	-0.335284	0.553371	MACS_peak_730	chr12	81171774	81172274	65	13	MACS_peak_730	chr12	81171797	81172251	87.84	chr12-81172209-81172830	9.2511
chr17-28137517-28138055	chr17	28137517	28138055	ATCGCGAGGATTAATCC	0.146996	0.729385	MACS_peak_1271	chr17	28137082	28137582	65	13	no_overlap	.	.	.	.	.	.
chr17-59623202-59623805	chr17	59623202	59623805	CAGTGCTCACAAGGGGA	0.136106	0.869276	MACS_peak_1332	chr17	59623655	59624805	150	13.0435	MACS_peak_1332	chr17	59623628	59624831	95.3	chr17-59623202-59623805	14.7132
chr3-63996688-63997331	chr3	63996688	63997331	AAAAGCTTTCGTCAATA	0.298022	0.562214	MACS_peak_2121	chr3	63995558	63996858	170	13.0769	MACS_peak_2121	chr3	63995518	63996897	66.06	chr3-63996688-63997331	15.1559
chr17-59362764-59363356	chr17	59362764	59363356	AGTTGACTCATGCTCTC;GCGCAATTACCCGAAGA	0.271799	0.706657	MACS_peak_1330	chr17	59361548	59362948	184	13.1429	MACS_peak_1330	chr17	59361518	59362977	204.92	chr17-59362764-59363356	14.599
chr17-59697940-59698680	chr17	59697940	59698680	TGTAGAGTAGAGCGGGA	-0.0295152	0.970669	MACS_peak_1334	chr17	59698351	59700851	329	13.16	MACS_peak_1334	chr17	59698322	59700879	82.32	chr17-59697940-59698680	14.0008
chr16-25565421-25565943	chr16	25565421	25565943	GGAGCGGTGGGGGGAGG	-0.0108942	0.986425	MACS_peak_1142	chr16	25564987	25565487	66	13.2	MACS_peak_1142	chr16	25564937	25565537	231.82	chr16-25565421-25565943	19.3333
chr17-59703006-59703564	chr17	59703006	59703564	GGCGGAGACGGGGGGTG	-1.38375	0.00129687	MACS_peak_1335	chr17	59703280	59705430	284	13.2093	MACS_peak_1335	chr17	59703249	59705461	147.58	chr17-59703006-59703564	14.2405
chr17-59699108-59699442	chr17	59699108	59699442	AGAGGGAAAAAGGTGTA	-0.218753	0.708333	MACS_peak_1334	chr17	59698351	59700851	334	13.36	MACS_peak_1334	chr17	59698322	59700879	82.32	chr17-59699108-59699442	13.0622
chr17-59756328-59756589	chr17	59756328	59756589	GTAGTACGAGGGGGGCG	-0.0955856	0.903337	MACS_peak_1338	chr17	59755395	59757345	261	13.3846	MACS_peak_1338	chr17	59755362	59757378	75.13	chr17-59756328-59756589	12.9464
chr2-30188415-30188922	chr2	30188415	30188922	TGGGGCCAATAGGGTGC	-0.163316	0.769579	MACS_peak_1602	chr2	30188828	30189528	94	13.4286	MACS_peak_1602	chr2	30188800	30189556	276.65	chr2-30188415-30188922	16.1376
chr20-53060031-53060833	chr20	53060031	53060833	AATCTTGACTGTGCAGA	0.160634	0.822727	MACS_peak_1956	chr20	53057263	53060463	432	13.5	MACS_peak_1956	chr20	53057217	53060508	138.64	chr20-53060031-53060833	14.4941
chr17-59703595-59703887	chr17	59703595	59703887	ATCATCGTTACGCGTTG	0.0902727	0.861808	MACS_peak_1335	chr17	59703280	59705430	292	13.5814	MACS_peak_1335	chr17	59703249	59705461	147.58	chr17-59703595-59703887	13.2007
chr17-59698096-59698691	chr17	59698096	59698691	TTTTTGTCGGTGGTTTG	-0.614924	0.338827	MACS_peak_1334	chr17	59698351	59700851	340	13.6	MACS_peak_1334	chr17	59698322	59700879	82.32	chr17-59698096-59698691	14.431
chr5-165258815-165259352	chr5	165258815	165259352	TTAGTTTTACAGGTTCC	0.0522361	0.925257	MACS_peak_2807	chr5	165259284	165259784	68	13.6	no_overlap	.	.	.	.	.	.
chr3-64822672-64823371	chr3	64822672	64823371	CTGAGGAGGAGTGAGCC;CTACCTTGAATCATCAT	0.373778	0.337658	MACS_peak_2123	chr3	64821118	64822918	246	13.6667	MACS_peak_2123	chr3	64821081	64822955	121.49	chr3-64822672-64823371	15.1014
chr17-59827376-59827755	chr17	59827376	59827755	CTAGCCTCCGGTATGAG	-0.207859	0.52859	MACS_peak_1341	chr17	59826452	59829202	379	13.7818	MACS_peak_1341	chr17	59826412	59829241	63.66	chr17-59827376-59827755	13.397
chr12-115279034-115279511	chr12	115279034	115279511	TACTAGGCAAGGTTCGT	0.326274	0.246273	MACS_peak_796	chr12	115279442	115279942	69	13.8	no_overlap	.	.	.	.	.	.
chr10-80901656-80902135	chr10	80901656	80902135	TAGCGGTCCACGGGGAA;CGTGGACCTTGGCAACA	-0.253152	0.382037	MACS_peak_377	chr10	80902066	80902566	69	13.8	no_overlap	.	.	.	.	.	.
chr17-59828818-59829751	chr17	59828818	59829751	GACCAGGGGGGCGCTTA	0.0131514	0.98738	MACS_peak_1341	chr17	59826452	59829202	384	13.9636	MACS_peak_1341	chr17	59826412	59829241	63.66	chr17-59828818-59829751	14.9523
chr10-24544409-24544974	chr10	24544409	24544974	TTTACATCTATGCCGAT	0.335692	0.339575	MACS_peak_332	chr10	24544904	24545404	70	14	MACS_peak_332	chr10	24544937	24545371	237.79	chr10-24544409-24544974	8.52535
chr20-53395821-53396360	chr20	53395821	53396360	GTGACATAGCAAATTAC	-0.316123	0.377554	MACS_peak_1960	chr20	53396079	53398079	281	14.05	MACS_peak_1960	chr20	53396048	53398110	79.03	chr20-53395821-53396360	15.1309
chr20-53060012-53060536	chr20	53060012	53060536	CGGGGGTAGGGATGGGG	-0.548779	0.0836771	MACS_peak_1956	chr20	53057263	53060463	451	14.0938	MACS_peak_1956	chr20	53057217	53060508	138.64	chr20-53060012-53060536	15.0714
chr17-59700497-59701134	chr17	59700497	59701134	CCTTGAATTTGCGCGAG	-0.111291	0.72283	MACS_peak_1334	chr17	59698351	59700851	354	14.16	MACS_peak_1334	chr17	59698322	59700879	82.32	chr17-59700497-59701134	14.9394
chr1-114878272-114878935	chr1	114878272	114878935	GGGTGAGGGCGGGGGTA	-1.60232	0.00122722	MACS_peak_116	chr1	114878864	114879364	71	14.2	MACS_peak_116	chr1	114878869	114879358	78.08	chr1-114878272-114878935	13.4969
chr1-154865722-154866600	chr1	154865722	154866600	CATATCCCGTCTGGTCG	-0.0979734	0.770617	MACS_peak_143	chr1	154865293	154865793	71	14.2	no_overlap	.	.	.	.	.	.
chr17-59698209-59698708	chr17	59698209	59698708	TCATCGGGTGGCATGAA	0.146136	0.710681	MACS_peak_1334	chr17	59698351	59700851	357	14.28	MACS_peak_1334	chr17	59698322	59700879	82.32	chr17-59698209-59698708	15.0958
chr17-59755096-59755675	chr17	59755096	59755675	ACTTGTGTGCTATTGTT	-0.722746	0.117896	MACS_peak_1338	chr17	59755395	59757345	280	14.359	MACS_peak_1338	chr17	59755362	59757378	75.13	chr17-59755096-59755675	15.5258
chr17-59828806-59829272	chr17	59828806	59829272	GAAAAGGGGGGGCGGCC	0.103668	0.876566	MACS_peak_1341	chr17	59826452	59829202	396	14.4	MACS_peak_1341	chr17	59826412	59829241	63.66	chr17-59828806-59829272	15.3765
chr20-53059998-53060514	chr20	53059998	53060514	GAAAACCAATGCCAAAC	0.0811922	0.883947	MACS_peak_1956	chr20	53057263	53060463	465	14.5313	MACS_peak_1956	chr20	53057217	53060508	138.64	chr20-53059998-53060514	15.4968
chr17-59703053-59703594	chr17	59703053	59703594	GGGGTGGGAACATAACT	-1.02638	0.0605856	MACS_peak_1335	chr17	59703280	59705430	314	14.6047	MACS_peak_1335	chr17	59703249	59705461	147.58	chr17-59703053-59703594	15.5967
chr17-59702948-59703595	chr17	59702948	59703595	CATGGATGTTTGACTTA;GGAGGCTGGCTGGATAC	-0.971836	0.00815041	MACS_peak_1335	chr17	59703280	59705430	315	14.6512	MACS_peak_1335	chr17	59703249	59705461	147.58	chr17-59702948-59703595	15.642
chr17-57015958-57016596	chr17	57015958	57016596	GCGTGGGTGCGCAGGGG	-1.05712	0.0725537	MACS_peak_1318	chr17	57015276	57016076	118	14.75	MACS_peak_1318	chr17	57015248	57016103	60.24	chr17-57015958-57016596	16.9591
chr17-59828794-59829556	chr17	59828794	59829556	TTCCATGGGGGAGTGGC	0.20324	0.57167	MACS_peak_1341	chr17	59826452	59829202	408	14.8364	MACS_peak_1341	chr17	59826412	59829241	63.66	chr17-59828794-59829556	15.8006
chr3-64822650-64823160	chr3	64822650	64823160	ACATTTCTGAATAATCT	0.232054	0.553625	MACS_peak_2123	chr3	64821118	64822918	268	14.8889	MACS_peak_2123	chr3	64821081	64822955	121.49	chr3-64822650-64823160	16.2753
chr20-53059984-53060612	chr20	53059984	53060612	AGGTAAGCCAGGGCTCG	-1.50973	4.70502e-06	MACS_peak_1956	chr20	53057263	53060463	479	14.9688	MACS_peak_1956	chr20	53057217	53060508	138.64	chr20-53059984-53060612	15.9222
chr8-133036805-133037548	chr8	133036805	133037548	GGCTCCAACTTTACATT	-0.142901	0.721575	MACS_peak_3421	chr8	133037473	133037973	75	15	MACS_peak_3421	chr8	133037443	133038003	155.19	chr8-133036805-133037548	18.75
chr12-62830272-62830813	chr12	62830272	62830813	GGAGACCGGACGTCGGT	-0.257608	0.430591	MACS_peak_685	chr12	62829847	62830347	75	15	MACS_peak_685	chr12	62829862	62830332	60.86	chr12-62830272-62830813	12.766
chr17-54498692-54499440	chr17	54498692	54499440	GGCGGGGAGTGGGGAGT;CTCATCCATTGCAGAGG	-0.100866	0.684923	MACS_peak_1307	chr17	54498267	54498767	75	15	no_overlap	.	.	.	.	.	.
chr20-46412665-46413460	chr20	46412665	46413460	TCCACATCAATTCCTAC	-0.313761	0.698618	MACS_peak_1945	chr20	46413362	46414012	98	15.0769	MACS_peak_1945	chr20	46413331	46414043	147.04	chr20-46412665-46413460	18.118
chr17-59698119-59698728	chr17	59698119	59698728	CGCCAAGGTCTAAAGTG	0.167916	0.81946	MACS_peak_1334	chr17	59698351	59700851	377	15.08	MACS_peak_1334	chr17	59698322	59700879	82.32	chr17-59698119-59698728	15.878
chr17-59700474-59701040	chr17	59700474	59701040	CGTGGTACACGAGGGCC	-0.0182968	0.976821	MACS_peak_1334	chr17	59698351	59700851	377	15.08	MACS_peak_1334	chr17	59698322	59700879	82.32	chr17-59700474-59701040	15.8389
chr20-53059364-53059847	chr20	53059364	53059847	CAGAGAGCGTGCGTGAG	0.222665	0.501622	MACS_peak_1956	chr20	53057263	53060463	483	15.0938	MACS_peak_1956	chr20	53057217	53060508	138.64	chr20-53059364-53059847	14.6764
chr17-59699677-59700055	chr17	59699677	59700055	TGGTGGAAGGGGCCAGG	1.39933	0.000621461	MACS_peak_1334	chr17	59698351	59700851	378	15.12	MACS_peak_1334	chr17	59698322	59700879	82.32	chr17-59699677-59700055	14.7829
chr17-59828783-59829317	chr17	59828783	59829317	TTACTTTTGTTTCTTGT	-0.692525	0.0147437	MACS_peak_1341	chr17	59826452	59829202	419	15.2364	MACS_peak_1341	chr17	59826412	59829241	63.66	chr17-59828783-59829317	16.1895
chr20-53058487-53058976	chr20	53058487	53058976	GTGCGGGCTGGGGCGGG	0.447906	0.329817	MACS_peak_1956	chr20	53057263	53060463	489	15.2812	MACS_peak_1956	chr20	53057217	53060508	138.64	chr20-53058487-53058976	14.8587
chr20-53059231-53059720	chr20	53059231	53059720	TGATGCGCGGGATGAGC	0.0592532	0.937954	MACS_peak_1956	chr20	53057263	53060463	489	15.2812	MACS_peak_1956	chr20	53057217	53060508	138.64	chr20-53059231-53059720	14.8587
chr17-59756408-59756706	chr17	59756408	59756706	ATGCTACAACTCAATGC	-0.0658398	0.876472	MACS_peak_1338	chr17	59755395	59757345	298	15.2821	MACS_peak_1338	chr17	59755362	59757378	75.13	chr17-59756408-59756706	14.7817
chr17-59703652-59703983	chr17	59703652	59703983	GTATCTGGATGGAAACG	-0.00171355	0.998281	MACS_peak_1335	chr17	59703280	59705430	331	15.3953	MACS_peak_1335	chr17	59703249	59705461	147.58	chr17-59703652-59703983	14.9638
chr2-167504282-167504771	chr2	167504282	167504771	GGGACAGGTCATAGGGG	-1.02619	6.03364e-07	MACS_peak_1770	chr2	167503859	167504359	77	15.4	no_overlap	.	.	.	.	.	.
chr20-53059551-53060046	chr20	53059551	53060046	AAGGGGAAGTGTGGGAT	-0.168802	0.634246	MACS_peak_1956	chr20	53057263	53060463	495	15.4688	MACS_peak_1956	chr20	53057217	53060508	138.64	chr20-53059551-53060046	15.041
chr20-53058483-53058979	chr20	53058483	53058979	GTTGGCAGGCGGATGGG	0.332008	0.159021	MACS_peak_1956	chr20	53057263	53060463	496	15.5	MACS_peak_1956	chr20	53057217	53060508	138.64	chr20-53058483-53058979	15.0714
chr17-59698073-59698739	chr17	59698073	59698739	GTGATTGGGGGGGCGGG	-0.845233	0.00550928	MACS_peak_1334	chr17	59698351	59700851	388	15.52	MACS_peak_1334	chr17	59698322	59700879	82.32	chr17-59698073-59698739	16.3082
chr6-126590968-126591486	chr6	126590968	126591486	GGACCTTCGGGACCCCA	-0.381126	0.618516	MACS_peak_3042	chr6	126590546	126591046	78	15.6	no_overlap	.	.	.	.	.	.
chr2-151277366-151277904	chr2	151277366	151277904	GTCATAGTGTTGAGCAT	-0.413491	0.426232	MACS_peak_1747	chr2	151276944	151277444	78	15.6	no_overlap	.	.	.	.	.	.
chr20-53059820-53060321	chr20	53059820	53060321	GTACTCTTCGACTCCCC	-0.164488	0.849428	MACS_peak_1956	chr20	53057263	53060463	501	15.6562	MACS_peak_1956	chr20	53057217	53060508	138.64	chr20-53059820-53060321	15.2233
chr20-53058467-53058970	chr20	53058467	53058970	CATGAAAAGTCCACGCT	0.513926	0.326407	MACS_peak_1956	chr20	53057263	53060463	503	15.7188	MACS_peak_1956	chr20	53057217	53060508	138.64	chr20-53058467-53058970	15.2841
chr17-59828769-59829468	chr17	59828769	59829468	GGACGGGACGCATGGGC	0.0726475	0.88773	MACS_peak_1341	chr17	59826452	59829202	433	15.7455	MACS_peak_1341	chr17	59826412	59829241	63.66	chr17-59828769-59829468	16.6843
chr20-53057632-53058137	chr20	53057632	53058137	GCCATGAACGTGGTCGG	0.168566	0.710681	MACS_peak_1956	chr20	53057263	53060463	505	15.7812	MACS_peak_1956	chr20	53057217	53060508	138.64	chr20-53057632-53058137	15.3449
chr3-153136-153794	chr3	153136	153794	ACCGCGGTGAGGGAAGA	0.331619	0.496478	MACS_peak_2036	chr3	152715	153215	79	15.8	MACS_peak_2036	chr3	152680	153249	260.32	chr3-153136-153794	19.8594
chr17-59698194-59698746	chr17	59698194	59698746	GGCTTTTGAAGGAAGTA	0.142249	0.798279	MACS_peak_1334	chr17	59698351	59700851	395	15.8	MACS_peak_1334	chr17	59698322	59700879	82.32	chr17-59698194-59698746	16.5819
chr17-59700455-59701013	chr17	59700455	59701013	CTGGGGTAAATGCTGGG	-0.10436	0.850462	MACS_peak_1334	chr17	59698351	59700851	396	15.84	MACS_peak_1334	chr17	59698322	59700879	82.32	chr17-59700455-59701013	16.5819
chr20-53058283-53058790	chr20	53058283	53058790	GATGGCCGAGATCCAGG	0.187299	0.517458	MACS_peak_1956	chr20	53057263	53060463	507	15.8438	MACS_peak_1956	chr20	53057217	53060508	138.64	chr20-53058283-53058790	15.4057
chr20-53059625-53060132	chr20	53059625	53060132	GAAGAGCCTCTGGTAGT	0.179896	0.6483	MACS_peak_1956	chr20	53057263	53060463	507	15.8438	MACS_peak_1956	chr20	53057217	53060508	138.64	chr20-53059625-53060132	15.4057
chr20-53366182-53366779	chr20	53366182	53366779	AACGTTTACCAGGGGCG	0.192208	0.762694	MACS_peak_1959	chr20	53365088	53366388	206	15.8462	MACS_peak_1959	chr20	53365044	53366431	65.2	chr20-53366182-53366779	17.9524
chr20-53059732-53060242	chr20	53059732	53060242	CTCGGTACAAGCCGTTG	0.257979	0.663267	MACS_peak_1956	chr20	53057263	53060463	510	15.9375	MACS_peak_1956	chr20	53057217	53060508	138.64	chr20-53059732-53060242	15.4968
chr20-53059223-53059733	chr20	53059223	53059733	GGGGCTCGGGAGCGAAG	0.189053	0.649679	MACS_peak_1956	chr20	53057263	53060463	510	15.9375	MACS_peak_1956	chr20	53057217	53060508	138.64	chr20-53059223-53059733	15.4968
chr20-53395903-53396399	chr20	53395903	53396399	AAGTCGGGGGGATGGGG	-0.198557	0.507163	MACS_peak_1960	chr20	53396079	53398079	320	16	MACS_peak_1960	chr20	53396048	53398110	79.03	chr20-53395903-53396399	17.0223
chr20-53059308-53059821	chr20	53059308	53059821	GGGTTTACGGGGCGGGG	-0.20995	0.404909	MACS_peak_1956	chr20	53057263	53060463	513	16.0312	MACS_peak_1956	chr20	53057217	53060508	138.64	chr20-53059308-53059821	15.588
chr20-53395539-53396400	chr20	53395539	53396400	CTTTTTGAACAGATGCA	-0.801671	0.00690246	MACS_peak_1960	chr20	53396079	53398079	321	16.05	MACS_peak_1960	chr20	53396048	53398110	79.03	chr20-53395539-53396400	17.0708
chr17-59700448-59700965	chr17	59700448	59700965	GTAAAGCCCCGGGCGGA	0.305509	0.421175	MACS_peak_1334	chr17	59698351	59700851	403	16.12	MACS_peak_1334	chr17	59698322	59700879	82.32	chr17-59700448-59700965	16.8557
chr17-59699076-59699480	chr17	59699076	59699480	AATGGTTGTCGTAGTGG	-0.257336	0.730129	MACS_peak_1334	chr17	59698351	59700851	404	16.16	MACS_peak_1334	chr17	59698322	59700879	82.32	chr17-59699076-59699480	15.7998
chr2-178034323-178034829	chr2	178034323	178034829	GGTGGGAGGTGGACTTG	-0.109956	0.819558	MACS_peak_1795	chr2	178034740	178035290	89	16.1818	MACS_peak_1795	chr2	178034702	178035327	370.78	chr2-178034323-178034829	20.32
chr20-53059014-53059532	chr20	53059014	53059532	GACTGGCCGGGGGTGGC	0.134492	0.812328	MACS_peak_1956	chr20	53057263	53060463	518	16.1875	MACS_peak_1956	chr20	53057217	53060508	138.64	chr20-53059014-53059532	15.7399
chr20-53059637-53060155	chr20	53059637	53060155	TCTTTGTAAGGATACCT	-0.166695	0.590116	MACS_peak_1956	chr20	53057263	53060463	518	16.1875	MACS_peak_1956	chr20	53057217	53060508	138.64	chr20-53059637-53060155	15.7399
chr17-59699075-59699480	chr17	59699075	59699480	CGACCGTGGGGGGGATG	0.905261	0.0184919	MACS_peak_1334	chr17	59698351	59700851	405	16.2	MACS_peak_1334	chr17	59698322	59700879	82.32	chr17-59699075-59699480	15.8389
chr3-63996647-63997264	chr3	63996647	63997264	TGCAGCCGCATCTCGTG;AGAACCGCCGAGAAGCG	0.306322	0.395234	MACS_peak_2121	chr3	63995558	63996858	211	16.2308	MACS_peak_2121	chr3	63995518	63996897	66.06	chr3-63996647-63997264	18.1291
chr20-53057865-53058385	chr20	53057865	53058385	GTGTGCATAATGTTGCC	0.489678	0.121806	MACS_peak_1956	chr20	53057263	53060463	520	16.25	MACS_peak_1956	chr20	53057217	53060508	138.64	chr20-53057865-53058385	15.8007
chr20-53059519-53060039	chr20	53059519	53060039	TTCAGGTTATACTTATA	0.0156441	0.978544	MACS_peak_1956	chr20	53057263	53060463	520	16.25	MACS_peak_1956	chr20	53057217	53060508	138.64	chr20-53059519-53060039	15.8007
chr20-53058158-53058679	chr20	53058158	53058679	AAGTGCCGCGAGCTAAA	0.29911	0.606738	MACS_peak_1956	chr20	53057263	53060463	521	16.2812	MACS_peak_1956	chr20	53057217	53060508	138.64	chr20-53058158-53058679	15.8311
chr15-56532000-56532539	chr15	56532000	56532539	GTGGGCCAGCGCGGCTG	-1.29692	0.00457025	MACS_peak_1055	chr15	56532425	56533125	114	16.2857	MACS_peak_1055	chr15	56532390	56533160	321.34	chr15-56532000-56532539	19.3506
chr20-53058161-53058684	chr20	53058161	53058684	AGGGGGGGGCTGACGCA	0.0981048	0.844893	MACS_peak_1956	chr20	53057263	53060463	523	16.3438	MACS_peak_1956	chr20	53057217	53060508	138.64	chr20-53058161-53058684	15.8918
chr17-59700442-59701064	chr17	59700442	59701064	GCCACACTGCGGCACGA	0.205996	0.531757	MACS_peak_1334	chr17	59698351	59700851	409	16.36	MACS_peak_1334	chr17	59698322	59700879	82.32	chr17-59700442-59701064	17.0903
chr2-153525159-153525667	chr2	153525159	153525667	GGGCGACAGCCGCGCCA	0.0848991	0.876185	MACS_peak_1752	chr2	153524741	153525241	82	16.4	no_overlap	.	.	.	.	.	.
chr20-53059478-53060003	chr20	53059478	53060003	CGCCGCTGAATATGGTT	0.0992167	0.887655	MACS_peak_1956	chr20	53057263	53060463	525	16.4062	MACS_peak_1956	chr20	53057217	53060508	138.64	chr20-53059478-53060003	15.9526
chr17-59700440-59700987	chr17	59700440	59700987	TGTTGGAGGCCCGGGAG	-0.136026	0.79783	MACS_peak_1334	chr17	59698351	59700851	411	16.44	MACS_peak_1334	chr17	59698322	59700879	82.32	chr17-59700440-59700987	17.1686
chr20-53058028-53058555	chr20	53058028	53058555	GATGGGGGGCCACATCC	-0.0848959	0.916051	MACS_peak_1956	chr20	53057263	53060463	527	16.4688	MACS_peak_1956	chr20	53057217	53060508	138.64	chr20-53058028-53058555	16.0134
chr20-53057492-53058021	chr20	53057492	53058021	ATAAAAGTAAGGATACT	-0.455682	0.134192	MACS_peak_1956	chr20	53057263	53060463	529	16.5312	MACS_peak_1956	chr20	53057217	53060508	138.64	chr20-53057492-53058021	16.0741
chr20-53366173-53366811	chr20	53366173	53366811	GGGACAGGAGTGATTCT	-0.213184	0.663267	MACS_peak_1959	chr20	53365088	53366388	215	16.5385	MACS_peak_1959	chr20	53365044	53366431	65.2	chr20-53366173-53366811	18.6013
chr5-131100417-131100997	chr5	131100417	131100997	ACCAGGCCTATATGCGG	-0.859291	0.0884309	MACS_peak_2747	chr5	131100914	131101414	83	16.6	MACS_peak_2747	chr5	131100980	131101348	97.89	chr5-131100417-131100997	4.61957
chr2-173043828-173044405	chr2	173043828	173044405	GGCCGCGAGGCAGTTGA	0.0297584	0.955099	MACS_peak_1784	chr2	173043411	173043911	83	16.6	no_overlap	.	.	.	.	.	.
chr17-59828123-59828580	chr17	59828123	59828580	GGAGGGGGCGACGGGGG	-0.198361	0.705725	MACS_peak_1341	chr17	59826452	59829202	457	16.6182	MACS_peak_1341	chr17	59826412	59829241	63.66	chr17-59828123-59828580	16.1541
chr20-53058337-53058871	chr20	53058337	53058871	GCCTCGGCGCATAGGTG	-0.704902	0.184174	MACS_peak_1956	chr20	53057263	53060463	534	16.6875	MACS_peak_1956	chr20	53057217	53060508	138.64	chr20-53058337-53058871	16.2261
chr20-53058041-53058576	chr20	53058041	53058576	AGAATTGGAGAATATAG	0.0706128	0.909434	MACS_peak_1956	chr20	53057263	53060463	535	16.7188	MACS_peak_1956	chr20	53057217	53060508	138.64	chr20-53058041-53058576	16.2565
chr17-59700433-59700963	chr17	59700433	59700963	GTGGCAGGGTAGTGGAA	0.291561	0.668304	MACS_peak_1334	chr17	59698351	59700851	418	16.72	MACS_peak_1334	chr17	59698322	59700879	82.32	chr17-59700433-59700963	17.4423
chr17-59828742-59829297	chr17	59828742	59829297	GATCCGTCGGATGGCGG;ACGTGGTTGGTTAGCGG	-0.489038	0.0474521	MACS_peak_1341	chr17	59826452	59829202	460	16.7273	MACS_peak_1341	chr17	59826412	59829241	63.66	chr17-59828742-59829297	17.6387
chr20-53058997-53059533	chr20	53058997	53059533	GGGTAGCCTGGTGGGCG	-0.212981	0.785724	MACS_peak_1956	chr20	53057263	53060463	536	16.75	MACS_peak_1956	chr20	53057217	53060508	138.64	chr20-53058997-53059533	16.2868
chr17-59698185-59698770	chr17	59698185	59698770	TATATGTGTTCAAGATG	0.207532	0.718026	MACS_peak_1334	chr17	59698351	59700851	419	16.76	MACS_peak_1334	chr17	59698322	59700879	82.32	chr17-59698185-59698770	17.5205
chr20-53058141-53058678	chr20	53058141	53058678	TGTTAAGAATGGGGAGT	-0.251975	0.360992	MACS_peak_1956	chr20	53057263	53060463	537	16.7812	MACS_peak_1956	chr20	53057217	53060508	138.64	chr20-53058141-53058678	16.3172
chr17-59827380-59827842	chr17	59827380	59827842	CGAATACTTACGGGAAG	-0.451052	0.283343	MACS_peak_1341	chr17	59826452	59829202	462	16.8	MACS_peak_1341	chr17	59826412	59829241	63.66	chr17-59827380-59827842	16.3309
chr17-59699365-59699785	chr17	59699365	59699785	TCGGCTACGCGATCTAA	0.0369639	0.927148	MACS_peak_1334	chr17	59698351	59700851	420	16.8	MACS_peak_1334	chr17	59698322	59700879	82.32	chr17-59699365-59699785	16.4255
chr17-59699317-59699738	chr17	59699317	59699738	TTCACTATTTTCCGTAG	-0.345326	0.666512	MACS_peak_1334	chr17	59698351	59700851	421	16.84	MACS_peak_1334	chr17	59698322	59700879	82.32	chr17-59699317-59699738	16.4646
chr17-59828738-59829310	chr17	59828738	59829310	GATAACGTGAATTATTC	-0.15015	0.785354	MACS_peak_1341	chr17	59826452	59829202	464	16.8727	MACS_peak_1341	chr17	59826412	59829241	63.66	chr17-59828738-59829310	17.7801
chr17-59700428-59701003	chr17	59700428	59701003	TGGTGAGCTGTATCAGG	0.118838	0.880602	MACS_peak_1334	chr17	59698351	59700851	423	16.92	MACS_peak_1334	chr17	59698322	59700879	82.32	chr17-59700428-59701003	17.6379
chr20-53059920-53060566	chr20	53059920	53060566	CGGGTCAGAATAGGAGC	0.297346	0.656785	MACS_peak_1956	chr20	53057263	53060463	543	16.9688	MACS_peak_1956	chr20	53057217	53060508	138.64	chr20-53059920-53060566	17.8669
chr6-58774597-58775107	chr6	58774597	58775107	GCGATCGTGGGCGCGGA	0.133711	0.758397	MACS_peak_2922	chr6	58774182	58774682	85	17	MACS_peak_2922	chr6	58774235	58774628	70.39	chr6-58774597-58775107	7.88804
chr2-28395519-28396339	chr2	28395519	28396339	TAACATGTAAAATCGGA	0.517321	0.345484	MACS_peak_1600	chr2	28395104	28395604	85	17	MACS_peak_1600	chr2	28395085	28395623	178.05	chr2-28395519-28396339	19.3309
chr17-59700425-59700904	chr17	59700425	59700904	CGGCCGGGTAGCGTTAG	0.348872	0.565078	MACS_peak_1334	chr17	59698351	59700851	426	17.04	MACS_peak_1334	chr17	59698322	59700879	82.32	chr17-59700425-59700904	17.7552
chr20-53059451-53059997	chr20	53059451	53059997	GACGACAACGTGATGCT	0.78623	0.116026	MACS_peak_1956	chr20	53057263	53060463	546	17.0625	MACS_peak_1956	chr20	53057217	53060508	138.64	chr20-53059451-53059997	16.5907
chr20-53058401-53058948	chr20	53058401	53058948	TGGCGGATTTATTGGGG;AAGGGTGGACCCGGCAC	-0.393858	0.215306	MACS_peak_1956	chr20	53057263	53060463	547	17.0938	MACS_peak_1956	chr20	53057217	53060508	138.64	chr20-53058401-53058948	16.6211
chr20-53058399-53058946	chr20	53058399	53058946	ACGGTTATGTCAGTCTC	-0.0333544	0.967096	MACS_peak_1956	chr20	53057263	53060463	547	17.0938	MACS_peak_1956	chr20	53057217	53060508	138.64	chr20-53058399-53058946	16.6211
chr20-53057817-53058364	chr20	53057817	53058364	TTCCACTGCTCCTTGCT	-0.157554	0.781197	MACS_peak_1956	chr20	53057263	53060463	547	17.0938	MACS_peak_1956	chr20	53057217	53060508	138.64	chr20-53057817-53058364	16.6211
chr20-53397737-53398740	chr20	53397737	53398740	CAGATGGCACGGTGTGG	0.582057	0.320014	MACS_peak_1960	chr20	53396079	53398079	342	17.1	MACS_peak_1960	chr20	53396048	53398110	79.03	chr20-53397737-53398740	18.0892
chr12-50156036-50156759	chr12	50156036	50156759	ACATGCTGTGAGGATCT	-0.456294	0.201166	MACS_peak_642	chr12	50156639	50157339	120	17.1429	MACS_peak_642	chr12	50156613	50157365	130.82	chr12-50156036-50156759	19.4149
chr20-53059601-53060150	chr20	53059601	53060150	GGTGGAGAGGCGGGCGG	-0.0712804	0.842051	MACS_peak_1956	chr20	53057263	53060463	549	17.1562	MACS_peak_1956	chr20	53057217	53060508	138.64	chr20-53059601-53060150	16.6819
chr17-59698246-59698780	chr17	59698246	59698780	TATGAGGGAGGTCGCGG	-0.146375	0.843423	MACS_peak_1334	chr17	59698351	59700851	429	17.16	MACS_peak_1334	chr17	59698322	59700879	82.32	chr17-59698246-59698780	17.9116
chr20-53059704-53060254	chr20	53059704	53060254	CCTGAGTGAGGCTCGCG	-0.613729	0.213936	MACS_peak_1956	chr20	53057263	53060463	550	17.1875	MACS_peak_1956	chr20	53057217	53060508	138.64	chr20-53059704-53060254	16.7122
chr7-40882598-40883329	chr7	40882598	40883329	ACGGAATCAGGCGGCAC	-0.720209	0.0662855	MACS_peak_3126	chr7	40883243	40883743	86	17.2	MACS_peak_3126	chr7	40883308	40883677	79.37	chr7-40882598-40883329	5.69106
chr17-59828575-59829048	chr17	59828575	59829048	GTCCCTTCAAACATTTT	-0.324878	0.699271	MACS_peak_1341	chr17	59826452	59829202	473	17.2	MACS_peak_1341	chr17	59826412	59829241	63.66	chr17-59828575-59829048	16.7197
chr6-30688459-30689140	chr6	30688459	30689140	GCAGGGGCATGAGGGGT	0.395447	0.247538	MACS_peak_2862	chr6	30688045	30688545	86	17.2	no_overlap	.	.	.	.	.	.
chr4-57325282-57325775	chr4	57325282	57325775	ACGGTTAGCGGCCGGAT;GTCGCGTACAGCAACGT	-0.0341582	0.99421	MACS_peak_2316	chr4	57325689	57326189	86	17.2	no_overlap	.	.	.	.	.	.
chr1-205684626-205685229	chr1	205684626	205685229	ACTTATTTTGCACGAAG;GCACGGGGGTGGCACGG	-0.208811	0.0275784	MACS_peak_252	chr1	205684088	205684738	112	17.2308	MACS_peak_252	chr1	205684040	205684785	104.08	chr1-205684626-205685229	21.3423
chr3-64820788-64821429	chr3	64820788	64821429	GAGCACCTCCGGTGAGG	0.520112	0.297202	MACS_peak_2123	chr3	64821118	64822918	311	17.2778	MACS_peak_2123	chr3	64821081	64822955	121.49	chr3-64820788-64821429	18.5699
chr3-64820672-64821430	chr3	64820672	64821430	CCGGTGTCGGAACGAGG	0.646003	0.0141134	MACS_peak_2123	chr3	64821118	64822918	312	17.3333	MACS_peak_2123	chr3	64821081	64822955	121.49	chr3-64820672-64821430	18.6233
chr20-53057251-53057818	chr20	53057251	53057818	TATAGTGTCTCACCCCG	0.211588	0.586733	MACS_peak_1956	chr20	53057263	53060463	555	17.3438	MACS_peak_1956	chr20	53057217	53060508	138.64	chr20-53057251-53057818	17.2288
chr17-59703652-59704026	chr17	59703652	59704026	GTGGGAGGCCGTAGCCG	-0.0388398	0.926159	MACS_peak_1335	chr17	59703280	59705430	374	17.3953	MACS_peak_1335	chr17	59703249	59705461	147.58	chr17-59703652-59704026	16.9078
chr9-84207578-84208052	chr9	84207578	84208052	AACGCGTAGAGGAAGCA	0.418529	0.345149	MACS_peak_3475	chr9	84207165	84207665	87	17.4	MACS_peak_3475	chr9	84207122	84207707	448.71	chr9-84207578-84208052	22.0513
chr20-53059701-53060258	chr20	53059701	53060258	TCGCTGAGGGGCTTATA	-0.511019	0.371788	MACS_peak_1956	chr20	53057263	53060463	557	17.4062	MACS_peak_1956	chr20	53057217	53060508	138.64	chr20-53059701-53060258	16.9249
chr20-53058109-53058669	chr20	53058109	53058669	TATTGGGAGTTGTCACG	0.29676	0.472767	MACS_peak_1956	chr20	53057263	53060463	560	17.5	MACS_peak_1956	chr20	53057217	53060508	138.64	chr20-53058109-53058669	17.0161
chr17-59700413-59701029	chr17	59700413	59701029	AATGAGATGTCACAAGT	0.103486	0.79783	MACS_peak_1334	chr17	59698351	59700851	438	17.52	MACS_peak_1334	chr17	59698322	59700879	82.32	chr17-59700413-59701029	18.2245
chr17-59827442-59827924	chr17	59827442	59827924	ATGAGGTGTAGTTCCGC	1.99273	8.02614e-11	MACS_peak_1341	chr17	59826452	59829202	482	17.5273	MACS_peak_1341	chr17	59826412	59829241	63.66	chr17-59827442-59827924	17.0378
chr17-59828498-59828980	chr17	59828498	59828980	GTTTCCCGGAACGCAGG	-0.0742736	0.869559	MACS_peak_1341	chr17	59826452	59829202	482	17.5273	MACS_peak_1341	chr17	59826412	59829241	63.66	chr17-59828498-59828980	17.0378
chr20-52937659-52938148	chr20	52937659	52938148	TGGAGGGATGCACCGCG	0.393811	0.367845	MACS_peak_1954	chr20	52937123	52937773	114	17.5385	MACS_peak_1954	chr20	52937097	52937798	63.93	chr20-52937659-52938148	19.8288
chr20-53059807-53060369	chr20	53059807	53060369	TAAGTGAGAGTAGGGAG	0.186113	0.608698	MACS_peak_1956	chr20	53057263	53060463	562	17.5625	MACS_peak_1956	chr20	53057217	53060508	138.64	chr20-53059807-53060369	17.0769
chr20-53059251-53059814	chr20	53059251	53059814	GAGTGGCAGACGGGTAT	0.107568	0.874039	MACS_peak_1956	chr20	53057263	53060463	563	17.5938	MACS_peak_1956	chr20	53057217	53060508	138.64	chr20-53059251-53059814	17.1073
chr20-53059140-53059703	chr20	53059140	53059703	AGGATCGCTCCTAGAAG	-0.211694	0.689303	MACS_peak_1956	chr20	53057263	53060463	563	17.5938	MACS_peak_1956	chr20	53057217	53060508	138.64	chr20-53059140-53059703	17.1073
chr17-59827013-59827497	chr17	59827013	59827497	GTTCTTGTGCAGGCGTA	-0.407284	0.308693	MACS_peak_1341	chr17	59826452	59829202	484	17.6	MACS_peak_1341	chr17	59826412	59829241	63.66	chr17-59827013-59827497	17.1085
chr17-59700411-59700947	chr17	59700411	59700947	GGTGGCGGTGAAGCGTC	0.56773	0.0169742	MACS_peak_1334	chr17	59698351	59700851	440	17.6	MACS_peak_1334	chr17	59698322	59700879	82.32	chr17-59700411-59700947	18.3027
chr20-53059733-53060297	chr20	53059733	53060297	GGGAAGATGTGACTTGG	0.187946	0.573941	MACS_peak_1956	chr20	53057263	53060463	564	17.625	MACS_peak_1956	chr20	53057217	53060508	138.64	chr20-53059733-53060297	17.1376
chr3-63995039-63995789	chr3	63995039	63995789	TTGGAGAGACAGAGGTT	0.787059	2.04179e-05	MACS_peak_2121	chr3	63995558	63996858	231	17.7692	MACS_peak_2121	chr3	63995518	63996897	66.06	chr3-63995039-63995789	19.6519
chr20-53057677-53058246	chr20	53057677	53058246	GGGTGAAGCAGGAGGCG	-0.0352441	0.948875	MACS_peak_1956	chr20	53057263	53060463	569	17.7812	MACS_peak_1956	chr20	53057217	53060508	138.64	chr20-53057677-53058246	17.2896
chr17-59827827-59828316	chr17	59827827	59828316	CAGGTGTTCGTGGTACG	0.00643507	0.992525	MACS_peak_1341	chr17	59826452	59829202	489	17.7818	MACS_peak_1341	chr17	59826412	59829241	63.66	chr17-59827827-59828316	17.2853
chr3-64822596-64823070	chr3	64822596	64823070	GTAGCCCGAGGGCGAGA	-0.408937	0.235604	MACS_peak_2123	chr3	64821118	64822918	322	17.8889	MACS_peak_2123	chr3	64821081	64822955	121.49	chr3-64822596-64823070	19.1569
chr17-59828469-59828961	chr17	59828469	59828961	GGTGATAGGACAGGGAG	-0.392128	0.276051	MACS_peak_1341	chr17	59826452	59829202	492	17.8909	MACS_peak_1341	chr17	59826412	59829241	63.66	chr17-59828469-59828961	17.3913
chr20-53059471-53060044	chr20	53059471	53060044	TTTCGCTGGTAACTTGG	-1.14139	0.00228018	MACS_peak_1956	chr20	53057263	53060463	573	17.9062	MACS_peak_1956	chr20	53057217	53060508	138.64	chr20-53059471-53060044	17.4111
chr17-59828709-59829318	chr17	59828709	59829318	TCGACGTCGGGAGTGGG	0.461619	0.172381	MACS_peak_1341	chr17	59826452	59829202	493	17.9273	MACS_peak_1341	chr17	59826412	59829241	63.66	chr17-59828709-59829318	18.8052
chr17-59828400-59828893	chr17	59828400	59828893	AAGGCGATTCCCGGTTA	-0.395632	0.16816	MACS_peak_1341	chr17	59826452	59829202	493	17.9273	MACS_peak_1341	chr17	59826412	59829241	63.66	chr17-59828400-59828893	17.4267
chr20-53058142-53058716	chr20	53058142	53058716	AACTAAGGTGAATGGGG	-0.278925	0.448565	MACS_peak_1956	chr20	53057263	53060463	574	17.9375	MACS_peak_1956	chr20	53057217	53060508	138.64	chr20-53058142-53058716	17.4415
chr20-53059082-53059656	chr20	53059082	53059656	TGGAGGTGAGGGTCCAG	-0.210472	0.683046	MACS_peak_1956	chr20	53057263	53060463	574	17.9375	MACS_peak_1956	chr20	53057217	53060508	138.64	chr20-53059082-53059656	17.4415
chr20-53059533-53060109	chr20	53059533	53060109	TTGGTGGTGTCGGGGGA;GGGAACGCGCGGCGGGT	-0.27244	0.771124	MACS_peak_1956	chr20	53057263	53060463	576	18	MACS_peak_1956	chr20	53057217	53060508	138.64	chr20-53059533-53060109	17.5023
chr17-19656805-19657367	chr17	19656805	19657367	CTACGGAACAGTGGGCT;GGGCCGGGGCGAGGAGC	0.523345	0.138575	MACS_peak_1266	chr17	19656395	19656895	90	18	MACS_peak_1266	chr17	19656366	19656923	310.14	chr17-19656805-19657367	21.1849
chr10-133610163-133611096	chr10	133610163	133611096	CATTTGCCTGAGAGCCG	-0.634133	0.00572615	MACS_peak_428	chr10	133609753	133610253	90	18	MACS_peak_428	chr10	133609823	133610182	132.26	chr10-133610163-133611096	5.29248
chr17-59828469-59828965	chr17	59828469	59828965	ATTTAGCTCTGTGTGTC;GGACGCGATAGCGCGGG	-0.324182	0.259223	MACS_peak_1341	chr17	59826452	59829202	496	18.0364	MACS_peak_1341	chr17	59826412	59829241	63.66	chr17-59828469-59828965	17.5327
chr17-59828101-59828597	chr17	59828101	59828597	GATAAGGCCTGGGGTGC	0.00513805	0.993652	MACS_peak_1341	chr17	59826452	59829202	496	18.0364	MACS_peak_1341	chr17	59826412	59829241	63.66	chr17-59828101-59828597	17.5327
chr20-53059385-53059963	chr20	53059385	53059963	CGCGGGGGTACGATTGC	-0.739358	0.0569064	MACS_peak_1956	chr20	53057263	53060463	578	18.0625	MACS_peak_1956	chr20	53057217	53060508	138.64	chr20-53059385-53059963	17.5631
chr17-59828232-59828729	chr17	59828232	59828729	GTTGCTACGGCCGAAAG	0.0135695	0.977302	MACS_peak_1341	chr17	59826452	59829202	497	18.0727	MACS_peak_1341	chr17	59826412	59829241	63.66	chr17-59828232-59828729	17.568
chr20-53057274-53057853	chr20	53057274	53057853	CCTCAAGGACGGGATGG	-0.366005	0.12204	MACS_peak_1956	chr20	53057263	53060463	579	18.0938	MACS_peak_1956	chr20	53057217	53060508	138.64	chr20-53057274-53057853	17.5934
chr17-59698222-59698804	chr17	59698222	59698804	GAGGCTGCACTCTCGAC	-0.0692769	0.909246	MACS_peak_1334	chr17	59698351	59700851	453	18.12	MACS_peak_1334	chr17	59698322	59700879	82.32	chr17-59698222-59698804	18.8502
chr17-59827371-59827871	chr17	59827371	59827871	ACGTTGTAACGATCACT	0.0607409	0.928515	MACS_peak_1341	chr17	59826452	59829202	500	18.1818	MACS_peak_1341	chr17	59826412	59829241	63.66	chr17-59827371-59827871	17.6741
chr17-59827669-59828169	chr17	59827669	59828169	GCCGTAGTGCGGGCGCC	-0.693318	0.00185458	MACS_peak_1341	chr17	59826452	59829202	500	18.1818	MACS_peak_1341	chr17	59826412	59829241	63.66	chr17-59827669-59828169	17.6741
chr20-53058630-53059212	chr20	53058630	53059212	TTGTTTATAGGACAAGT;TGCTTGAGACGCCGGGG	0.293663	0.564648	MACS_peak_1956	chr20	53057263	53060463	582	18.1875	MACS_peak_1956	chr20	53057217	53060508	138.64	chr20-53058630-53059212	17.6846
chr20-53057520-53058102	chr20	53057520	53058102	TGCCGGGGATTAGAGGG	-0.417361	0.319793	MACS_peak_1956	chr20	53057263	53060463	582	18.1875	MACS_peak_1956	chr20	53057217	53060508	138.64	chr20-53057520-53058102	17.6846
chr5-19784507-19784829	chr5	19784507	19784829	GTTGCGGAGGGCAGTTA	2.13564	2.53812e-07	MACS_peak_2451	chr5	19784098	19784598	91	18.2	MACS_peak_2451	chr5	19784181	19784515	78.35	chr5-19784507-19784829	2.39521
chr10-95182807-95183406	chr10	95182807	95183406	GAAGGGGGCAAGCGTGT	-1.12639	0.0281956	MACS_peak_394	chr10	95182398	95182898	91	18.2	no_overlap	.	.	.	.	.	.
chr6-106721884-106722454	chr6	106721884	106722454	TAGGAGATGGATCGCTT	0.013698	0.98884	MACS_peak_3012	chr6	106722363	106722863	91	18.2	no_overlap	.	.	.	.	.	.
chr17-59827068-59827569	chr17	59827068	59827569	TATCGGTCATGACGCTG	0.0388029	0.936197	MACS_peak_1341	chr17	59826452	59829202	501	18.2182	MACS_peak_1341	chr17	59826412	59829241	63.66	chr17-59827068-59827569	17.7094
chr17-59827620-59828121	chr17	59827620	59828121	AGAGGTCCCTCGAGGCG;CGGTCCAGGGGCCCCGT	-0.242885	0.606305	MACS_peak_1341	chr17	59826452	59829202	501	18.2182	MACS_peak_1341	chr17	59826412	59829241	63.66	chr17-59827620-59828121	17.7094
chr17-59828287-59828788	chr17	59828287	59828788	TGGACATTAGGGGGGGG	-0.0348939	0.954204	MACS_peak_1341	chr17	59826452	59829202	501	18.2182	MACS_peak_1341	chr17	59826412	59829241	63.66	chr17-59828287-59828788	17.7094
chr20-53058071-53058654	chr20	53058071	53058654	GCGGGTGATTAGGCGGT	0.0524611	0.958619	MACS_peak_1956	chr20	53057263	53060463	583	18.2188	MACS_peak_1956	chr20	53057217	53060508	138.64	chr20-53058071-53058654	17.715
chr20-53059233-53059816	chr20	53059233	53059816	GCTGACGGGGCGCCCCG	0.421255	0.409146	MACS_peak_1956	chr20	53057263	53060463	583	18.2188	MACS_peak_1956	chr20	53057217	53060508	138.64	chr20-53059233-53059816	17.715
chr17-59700395-59700950	chr17	59700395	59700950	CTATCTAGATATCGTCT	-0.105964	0.863191	MACS_peak_1334	chr17	59698351	59700851	456	18.24	MACS_peak_1334	chr17	59698322	59700879	82.32	chr17-59700395-59700950	18.9284
chr20-53058177-53058763	chr20	53058177	53058763	TTCAGGGCTGTGGCAAG	0.206412	0.502431	MACS_peak_1956	chr20	53057263	53060463	586	18.3125	MACS_peak_1956	chr20	53057217	53060508	138.64	chr20-53058177-53058763	17.8061
chr17-59698191-59698809	chr17	59698191	59698809	GCAACGCGTGGCGGACG	0.327968	0.46466	MACS_peak_1334	chr17	59698351	59700851	458	18.32	MACS_peak_1334	chr17	59698322	59700879	82.32	chr17-59698191-59698809	19.0458
chr20-53057860-53058447	chr20	53057860	53058447	GCCAAGGGAGAATCTTG	0.599868	0.182097	MACS_peak_1956	chr20	53057263	53060463	587	18.3438	MACS_peak_1956	chr20	53057217	53060508	138.64	chr20-53057860-53058447	17.8365
chr17-59828380-59828887	chr17	59828380	59828887	TAGTTTCGAATGATGGG	-0.0159492	0.98185	MACS_peak_1341	chr17	59826452	59829202	507	18.4364	MACS_peak_1341	chr17	59826412	59829241	63.66	chr17-59828380-59828887	17.9215
chr17-59828466-59828974	chr17	59828466	59828974	GGGTGGCGTATTTAATG	0.0421145	0.952105	MACS_peak_1341	chr17	59826452	59829202	508	18.4727	MACS_peak_1341	chr17	59826412	59829241	63.66	chr17-59828466-59828974	17.9569
chr17-59828379-59828887	chr17	59828379	59828887	GGCATGGGCCAGGTTGT	0.0485902	0.937506	MACS_peak_1341	chr17	59826452	59829202	508	18.4727	MACS_peak_1341	chr17	59826412	59829241	63.66	chr17-59828379-59828887	17.9569
chr20-53059579-53060171	chr20	53059579	53060171	TGTCCAGCCGAACCGCC;TTGTCACTATGTCCGTG	0.203716	0.843673	MACS_peak_1956	chr20	53057263	53060463	592	18.5	MACS_peak_1956	chr20	53057217	53060508	138.64	chr20-53059579-53060171	17.9885
chr20-53059098-53059690	chr20	53059098	53059690	TATATGTTCATCATGCT	-0.0469869	0.929107	MACS_peak_1956	chr20	53057263	53060463	592	18.5	MACS_peak_1956	chr20	53057217	53060508	138.64	chr20-53059098-53059690	17.9885
chr17-59827372-59827881	chr17	59827372	59827881	CTCGAGTTGAACTGACG	-0.312691	0.370029	MACS_peak_1341	chr17	59826452	59829202	509	18.5091	MACS_peak_1341	chr17	59826412	59829241	63.66	chr17-59827372-59827881	17.9922
chr17-59699055-59699518	chr17	59699055	59699518	GGGTCGTGTGTCGAAGC	-0.333004	0.231629	MACS_peak_1334	chr17	59698351	59700851	463	18.52	MACS_peak_1334	chr17	59698322	59700879	82.32	chr17-59699055-59699518	18.1072
chr17-59827371-59827881	chr17	59827371	59827881	CGGATGACAAGGCGACG;GCAGTATGCGTCTTTGC;TTGGTCGAAGGAGGAGG	-0.0423009	0.496213	MACS_peak_1341	chr17	59826452	59829202	510	18.5455	MACS_peak_1341	chr17	59826412	59829241	63.66	chr17-59827371-59827881	18.0276
chr17-59698094-59698815	chr17	59698094	59698815	TGGCAGTCGTGTGCGTG	-0.218026	0.623139	MACS_peak_1334	chr17	59698351	59700851	464	18.56	MACS_peak_1334	chr17	59698322	59700879	82.32	chr17-59698094-59698815	19.2804
chr8-67036800-67037363	chr8	67036800	67037363	CTCGGGGTTTGAGCTCG	-0.550977	0.0866356	MACS_peak_3312	chr8	67036393	67036893	93	18.6	MACS_peak_3312	chr8	67036479	67036806	89.13	chr8-67036800-67037363	1.83486
chr7-37632272-37632972	chr7	37632272	37632972	GTTGGGGTGGAGGTTGA	0.144453	0.839773	MACS_peak_3123	chr7	37631865	37632365	93	18.6	MACS_peak_3123	chr7	37631930	37632299	82.63	chr7-37632272-37632972	7.31707
chr14-57133322-57134275	chr14	57133322	57134275	TTGGCGTTCATGCTCGT	0.334754	0.492458	MACS_peak_908	chr14	57132915	57133415	93	18.6	MACS_peak_908	chr14	57132934	57133396	150.2	chr14-57133322-57134275	16.0173
chr10-15165235-15165898	chr10	15165235	15165898	GCTGGGGGGGGCAGGGC	-1.24909	0.0128618	MACS_peak_318	chr10	15165805	15166305	93	18.6	MACS_peak_318	chr10	15165817	15166293	94.53	chr10-15165235-15165898	17.0168
chr6-137693107-137693731	chr6	137693107	137693731	CAGGCAAGGCTGGCGCG	-0.633843	0.00652134	MACS_peak_3054	chr6	137693638	137694138	93	18.6	no_overlap	.	.	.	.	.	.
chr17-59828073-59828585	chr17	59828073	59828585	CGGGGGCATGACGGGGA	0.216658	0.826216	MACS_peak_1341	chr17	59826452	59829202	512	18.6182	MACS_peak_1341	chr17	59826412	59829241	63.66	chr17-59828073-59828585	18.0983
chr17-59699125-59699591	chr17	59699125	59699591	TACCTAGTGTACGTAGG	0.0572663	0.959217	MACS_peak_1334	chr17	59698351	59700851	466	18.64	MACS_peak_1334	chr17	59698322	59700879	82.32	chr17-59699125-59699591	18.2245
chr17-59828558-59829071	chr17	59828558	59829071	GTATGGACCCACTTATC	0.129533	0.791809	MACS_peak_1341	chr17	59826452	59829202	513	18.6545	MACS_peak_1341	chr17	59826412	59829241	63.66	chr17-59828558-59829071	18.1336
chr20-53059216-53059813	chr20	53059216	53059813	TCGCCCCGTGGCCGAAG	0.341004	0.413829	MACS_peak_1956	chr20	53057263	53060463	597	18.6562	MACS_peak_1956	chr20	53057217	53060508	138.64	chr20-53059216-53059813	18.1404
chr9-117671076-117671755	chr9	117671076	117671755	GGTCGGGCAGGGTGCCC	0.869436	0.0174674	MACS_peak_3534	chr9	117670507	117671207	131	18.7143	MACS_peak_3534	chr9	117670470	117671243	307.39	chr9-117671076-117671755	21.6041
chr20-53058166-53058765	chr20	53058166	53058765	GGACCGGCTGACAACAT	0.239412	0.716279	MACS_peak_1956	chr20	53057263	53060463	599	18.7188	MACS_peak_1956	chr20	53057217	53060508	138.64	chr20-53058166-53058765	18.2012
chr20-53058462-53059061	chr20	53058462	53059061	GAGGTGGTGAGGGTCGA	0.0713395	0.89171	MACS_peak_1956	chr20	53057263	53060463	599	18.7188	MACS_peak_1956	chr20	53057217	53060508	138.64	chr20-53058462-53059061	18.2012
chr3-64822581-64823386	chr3	64822581	64823386	ATGGCCGCGGCGGGCTG	0.565459	0.0479657	MACS_peak_2123	chr3	64821118	64822918	337	18.7222	MACS_peak_2123	chr3	64821081	64822955	121.49	chr3-64822581-64823386	19.9573
chr9-111252184-111252883	chr9	111252184	111252883	GTTAGCACAAGTATAGA	-0.0110249	0.978608	MACS_peak_3523	chr9	111251778	111252278	94	18.8	MACS_peak_3523	chr9	111251776	111252279	82.65	chr9-111252184-111252883	18.8867
chr7-26234837-26235360	chr7	26234837	26235360	GAGGGGTCGGGATCGGT	0.371548	0.132473	MACS_peak_3110	chr7	26235266	26235766	94	18.8	no_overlap	.	.	.	.	.	.
chr2-18216617-18217138	chr2	18216617	18217138	GTGAGTGTGGGCAAAGG	-0.304915	0.270388	MACS_peak_1583	chr2	18216211	18216711	94	18.8	no_overlap	.	.	.	.	.	.
chr17-54498673-54499326	chr17	54498673	54499326	TGGCCTGGCCAGGCTGG;TGTATCAGAGAGGTGAC	-0.117745	0.252533	MACS_peak_1307	chr17	54498267	54498767	94	18.8	no_overlap	.	.	.	.	.	.
chr20-53059822-53060424	chr20	53059822	53060424	ATTTAGCAGTCGACCCA	0.00406403	0.995406	MACS_peak_1956	chr20	53057263	53060463	602	18.8125	MACS_peak_1956	chr20	53057217	53060508	138.64	chr20-53059822-53060424	18.2923
chr3-64822579-64823074	chr3	64822579	64823074	TGTGCTAGGGTTATATA	0.271399	0.565964	MACS_peak_2123	chr3	64821118	64822918	339	18.8333	MACS_peak_2123	chr3	64821081	64822955	121.49	chr3-64822579-64823074	20.064
chr17-59828430-59828949	chr17	59828430	59828949	AGCTCAGGACGTACTGA	-0.397573	0.557656	MACS_peak_1341	chr17	59826452	59829202	519	18.8727	MACS_peak_1341	chr17	59826412	59829241	63.66	chr17-59828430-59828949	18.3457
chr20-53058869-53059473	chr20	53058869	53059473	GGGTAATTCGAAAGCCT	0.457141	0.453489	MACS_peak_1956	chr20	53057263	53060463	604	18.875	MACS_peak_1956	chr20	53057217	53060508	138.64	chr20-53058869-53059473	18.3531
chr17-59828591-59829111	chr17	59828591	59829111	TTGGTCGATCGGGCATA;GAAGCTGGATGAGGTGA	0.2054	0.677457	MACS_peak_1341	chr17	59826452	59829202	520	18.9091	MACS_peak_1341	chr17	59826412	59829241	63.66	chr17-59828591-59829111	18.3811
chr2-37881597-37882111	chr2	37881597	37882111	ACGGTGGTGGTTATAAT	0.149265	0.754505	MACS_peak_1611	chr2	37881070	37881720	123	18.9231	MACS_peak_1611	chr2	37881033	37881757	295.99	chr2-37881597-37882111	22.0994
chr17-59827845-59828366	chr17	59827845	59828366	TTGGACTTTGATGGCGA	0.170254	0.540443	MACS_peak_1341	chr17	59826452	59829202	521	18.9455	MACS_peak_1341	chr17	59826412	59829241	63.66	chr17-59827845-59828366	18.4164
chr17-59827456-59827977	chr17	59827456	59827977	TGGGTGGCGGGGTATCA	-0.0187255	0.976506	MACS_peak_1341	chr17	59826452	59829202	521	18.9455	MACS_peak_1341	chr17	59826412	59829241	63.66	chr17-59827456-59827977	18.4164
chr20-53058374-53058982	chr20	53058374	53058982	ACTCGTGGCGTGGGGAC	-0.332686	0.513265	MACS_peak_1956	chr20	53057263	53060463	608	19	MACS_peak_1956	chr20	53057217	53060508	138.64	chr20-53058374-53058982	18.4746
chr17-59698264-59698826	chr17	59698264	59698826	TGAAATTTAGCACTATG	0.0810697	0.93569	MACS_peak_1334	chr17	59698351	59700851	475	19	MACS_peak_1334	chr17	59698322	59700879	82.32	chr17-59698264-59698826	19.7106
chr17-59698504-59698980	chr17	59698504	59698980	GGAAGTCGGTTTACCAA	0.208831	0.565655	MACS_peak_1334	chr17	59698351	59700851	476	19.04	MACS_peak_1334	chr17	59698322	59700879	82.32	chr17-59698504-59698980	18.6156
chr3-64822575-64823142	chr3	64822575	64823142	CTTTGTAGTAGGATGAG	0.742633	0.0210834	MACS_peak_2123	chr3	64821118	64822918	343	19.0556	MACS_peak_2123	chr3	64821081	64822955	121.49	chr3-64822575-64823142	20.2775
chr17-59699244-59699722	chr17	59699244	59699722	AAGTCTTGCAGCGTAGA	0.267759	0.607497	MACS_peak_1334	chr17	59698351	59700851	478	19.12	MACS_peak_1334	chr17	59698322	59700879	82.32	chr17-59699244-59699722	18.6938
chr5-42597957-42598380	chr5	42597957	42598380	TCCGGGTGCAGAGGAGG;GGAGAATCAAAGGCTTG	-0.0598439	0.977155	MACS_peak_2512	chr5	42598284	42598784	96	19.2	MACS_peak_2512	chr5	42598328	42598740	159.45	chr5-42597957-42598380	12.6214
chr17-59827228-59827756	chr17	59827228	59827756	GTGGTACACTGGATGCC	-0.113686	0.765026	MACS_peak_1341	chr17	59826452	59829202	528	19.2	MACS_peak_1341	chr17	59826412	59829241	63.66	chr17-59827228-59827756	18.6638
chr10-109798841-109799522	chr10	109798841	109799522	GAGGGCTGGAGGGAGCA	0.0343849	0.958574	MACS_peak_409	chr10	109799426	109799926	96	19.2	no_overlap	.	.	.	.	.	.
chr1-144891927-144892404	chr1	144891927	144892404	CTGGGCGGACTGTGGGA	0.477213	0.276163	MACS_peak_126	chr1	144892308	144892808	96	19.2	no_overlap	.	.	.	.	.	.
chr17-59827584-59828113	chr17	59827584	59828113	GATGTCGGCGAAGAAAG;AGAAGTTTGGGATCCGA	0.0984713	0.82198	MACS_peak_1341	chr17	59826452	59829202	529	19.2364	MACS_peak_1341	chr17	59826412	59829241	63.66	chr17-59827584-59828113	18.6992
chr20-46620983-46621510	chr20	46620983	46621510	GGGTGGCAGCTAGAGGC	0.284139	0.399643	MACS_peak_1946	chr20	46621298	46622398	212	19.2727	MACS_peak_1946	chr20	46621272	46622423	730.37	chr20-46620983-46621510	20.6777
chr20-53058137-53058756	chr20	53058137	53058756	GGGGGGTAGAGGAGCTC	-0.790639	0.0166204	MACS_peak_1956	chr20	53057263	53060463	619	19.3438	MACS_peak_1956	chr20	53057217	53060508	138.64	chr20-53058137-53058756	18.8089
chr17-59828346-59828878	chr17	59828346	59828878	GACGGGGGGCCGGAGGG	-0.27247	0.363364	MACS_peak_1341	chr17	59826452	59829202	532	19.3455	MACS_peak_1341	chr17	59826412	59829241	63.66	chr17-59828346-59828878	18.8052
chr20-46620928-46621511	chr20	46620928	46621511	GTTATTAATCTGTTGTT	-0.131229	0.761908	MACS_peak_1946	chr20	46621298	46622398	213	19.3636	MACS_peak_1946	chr20	46621272	46622423	730.37	chr20-46620928-46621511	20.7646
chr3-63995068-63995810	chr3	63995068	63995810	CTCTTCGGGGACTTCTC	0.0615826	0.877111	MACS_peak_2121	chr3	63995558	63996858	252	19.3846	MACS_peak_2121	chr3	63995518	63996897	66.06	chr3-63995068-63995810	21.1748
chr20-53059299-53059922	chr20	53059299	53059922	ATCCTAGAACGGTTTGC	0.025193	0.958697	MACS_peak_1956	chr20	53057263	53060463	623	19.4688	MACS_peak_1956	chr20	53057217	53060508	138.64	chr20-53059299-53059922	18.9304
chr17-59698737-59699224	chr17	59698737	59699224	TTCAGAGAGTCATGCAC	0.0604726	0.931225	MACS_peak_1334	chr17	59698351	59700851	487	19.48	MACS_peak_1334	chr17	59698322	59700879	82.32	chr17-59698737-59699224	19.0458
chr20-53057998-53058624	chr20	53057998	53058624	ACGTGGGTGTGGCGCAG	-0.423807	0.444092	MACS_peak_1956	chr20	53057263	53060463	626	19.5625	MACS_peak_1956	chr20	53057217	53060508	138.64	chr20-53057998-53058624	19.0216
chr5-42597497-42598382	chr5	42597497	42598382	TCGGGATCAAGAAACAC	0.053408	0.917174	MACS_peak_2512	chr5	42598284	42598784	98	19.6	MACS_peak_2512	chr5	42598328	42598740	159.45	chr5-42597497-42598382	13.1068
chr17-59700258-59700748	chr17	59700258	59700748	GGGCCATGGGGAGGGTG;GACGCCCTGGGAATGCC	-0.280021	0.515215	MACS_peak_1334	chr17	59698351	59700851	490	19.6	MACS_peak_1334	chr17	59698322	59700879	82.32	chr17-59700258-59700748	19.1631
chr12-77463550-77464058	chr12	77463550	77464058	GTGTCAGGAAGGCCTAA	0.414685	0.516974	MACS_peak_718	chr12	77463960	77464460	98	19.6	no_overlap	.	.	.	.	.	.
chr11-27912731-27913262	chr11	27912731	27913262	GGGGAGGAGCGCGGCAC	0.398234	0.258839	MACS_peak_474	chr11	27912329	27912829	98	19.6	no_overlap	.	.	.	.	.	.
chr8-91141313-91141745	chr8	91141313	91141745	TTTTCGTGTAGATCGAC	-0.692563	0.0148774	MACS_peak_3327	chr8	91141647	91142147	98	19.6	no_overlap	.	.	.	.	.	.
chr3-63995199-63995813	chr3	63995199	63995813	TGTGCATCGTGGTAAAC	0.224624	0.573909	MACS_peak_2121	chr3	63995558	63996858	255	19.6154	MACS_peak_2121	chr3	63995518	63996897	66.06	chr3-63995199-63995813	21.3923
chr3-63995203-63995813	chr3	63995203	63995813	GGGTACTGTTCATTGAA	-0.021189	0.977043	MACS_peak_2121	chr3	63995558	63996858	255	19.6154	MACS_peak_2121	chr3	63995518	63996897	66.06	chr3-63995203-63995813	21.3923
chr17-59703040-59703702	chr17	59703040	59703702	CTCGTCAGGATTTGTTG;AGAGAGATCGGGTGATA	-1.1248	0.00254	MACS_peak_1335	chr17	59703280	59705430	422	19.6279	MACS_peak_1335	chr17	59703249	59705461	147.58	chr17-59703040-59703702	20.4792
chr17-59699516-59700007	chr17	59699516	59700007	GCGGGTAAGGGGGGAGC	2.32078	4.19712e-12	MACS_peak_1334	chr17	59698351	59700851	491	19.64	MACS_peak_1334	chr17	59698322	59700879	82.32	chr17-59699516-59700007	19.2022
chr20-53058119-53058748	chr20	53058119	53058748	GCACCGTGTGAGGCAGC	0.612345	0.00938661	MACS_peak_1956	chr20	53057263	53060463	629	19.6562	MACS_peak_1956	chr20	53057217	53060508	138.64	chr20-53058119-53058748	19.1127
chr3-64820871-64821472	chr3	64820871	64821472	TAGAGTAGACGTGCGGG;CCACGCTCTGGACGGGA	-0.385072	0.465339	MACS_peak_2123	chr3	64821118	64822918	354	19.6667	MACS_peak_2123	chr3	64821081	64822955	121.49	chr3-64820871-64821472	20.8645
chr20-53059515-53060147	chr20	53059515	53060147	TGGTGTGGTGCGGACGG;ACATCGTTATTTTCAGT	0.0423913	0.956033	MACS_peak_1956	chr20	53057263	53060463	632	19.75	MACS_peak_1956	chr20	53057217	53060508	138.64	chr20-53059515-53060147	19.2039
chr17-59699478-59699973	chr17	59699478	59699973	CAATGCTAAGGGCGACG	1.69558	4.33091e-07	MACS_peak_1334	chr17	59698351	59700851	495	19.8	MACS_peak_1334	chr17	59698322	59700879	82.32	chr17-59699478-59699973	19.3586
chr17-59699283-59699778	chr17	59699283	59699778	AGAGGGGGGGCCCGTAG	-0.63455	0.0272344	MACS_peak_1334	chr17	59698351	59700851	495	19.8	MACS_peak_1334	chr17	59698322	59700879	82.32	chr17-59699283-59699778	19.3586
chr11-84969414-84970115	chr11	84969414	84970115	TGGGACTGAAGCATCTA	0.472136	0.0398092	MACS_peak_565	chr11	84969013	84969513	99	19.8	no_overlap	.	.	.	.	.	.
chr6-100284705-100285237	chr6	100284705	100285237	CGTTATCAATGTTAAGA	-0.137741	0.825426	MACS_peak_3000	chr6	100284304	100284804	99	19.8	no_overlap	.	.	.	.	.	.
chr17-59698882-59699378	chr17	59698882	59699378	AATGCGGGCCAATGGGC	0.13204	0.653432	MACS_peak_1334	chr17	59698351	59700851	496	19.84	MACS_peak_1334	chr17	59698322	59700879	82.32	chr17-59698882-59699378	19.3977
chr17-59698553-59699049	chr17	59698553	59699049	GCCGGGGGCGGCGGGAG	-0.0917614	0.895625	MACS_peak_1334	chr17	59698351	59700851	496	19.84	MACS_peak_1334	chr17	59698322	59700879	82.32	chr17-59698553-59699049	19.3977
chr20-53059062-53059697	chr20	53059062	53059697	ATGTGGCACTGGTAAAC	0.64034	0.0247145	MACS_peak_1956	chr20	53057263	53060463	635	19.8438	MACS_peak_1956	chr20	53057217	53060508	138.64	chr20-53059062-53059697	19.295
chr3-63996600-63997237	chr3	63996600	63997237	AGCGGTGTTGGTGGGGC	0.517466	0.0284381	MACS_peak_2121	chr3	63995558	63996858	258	19.8462	MACS_peak_2121	chr3	63995518	63996897	66.06	chr3-63996600-63997237	21.5373
chr17-59756869-59757256	chr17	59756869	59757256	CGGAGGCAGCGGACGCG	0.932144	1.34414e-05	MACS_peak_1338	chr17	59755395	59757345	387	19.8462	MACS_peak_1338	chr17	59755362	59757378	75.13	chr17-59756869-59757256	19.1964
chr17-59827359-59827905	chr17	59827359	59827905	GCGTTGATACCGTACAC	-0.0791685	0.820103	MACS_peak_1341	chr17	59826452	59829202	546	19.8545	MACS_peak_1341	chr17	59826412	59829241	63.66	chr17-59827359-59827905	19.3001
chr17-59698089-59698848	chr17	59698089	59698848	CTGTAAGCCATCACGGC	-0.174512	0.674299	MACS_peak_1334	chr17	59698351	59700851	497	19.88	MACS_peak_1334	chr17	59698322	59700879	82.32	chr17-59698089-59698848	20.571
chr17-59827497-59828044	chr17	59827497	59828044	AGGGCAATCAGCAGGCG	-0.114893	0.795001	MACS_peak_1341	chr17	59826452	59829202	547	19.8909	MACS_peak_1341	chr17	59826412	59829241	63.66	chr17-59827497-59828044	19.3355
chr20-53059307-53059945	chr20	53059307	53059945	CTGATCGGAGCGTGACG	0.158512	0.6687	MACS_peak_1956	chr20	53057263	53060463	638	19.9375	MACS_peak_1956	chr20	53057217	53060508	138.64	chr20-53059307-53059945	19.3862
chr17-59699211-59699710	chr17	59699211	59699710	AATGGAGGCGGGGGGGC	-0.351689	0.175982	MACS_peak_1334	chr17	59698351	59700851	499	19.96	MACS_peak_1334	chr17	59698322	59700879	82.32	chr17-59699211-59699710	19.5151
chr20-53059824-53060465	chr20	53059824	53060465	GGCGGTTGTCAGGGCGA	0.483479	0.113996	MACS_peak_1956	chr20	53057263	53060463	639	19.9688	MACS_peak_1956	chr20	53057217	53060508	138.64	chr20-53059824-53060465	19.4774
chr9-117671067-117671573	chr9	117671067	117671573	TAGGAGGAGCATTCCCG;CGTGGGAGGGACTTTAA;GGAGGGCCGTGAGGGCG	-0.00490569	0.968232	MACS_peak_3534	chr9	117670507	117671207	140	20	MACS_peak_3534	chr9	117670470	117671243	307.39	chr9-117671067-117671573	22.7684
chr4-28353118-28353605	chr4	28353118	28353605	CAAGGTCAGCGTACTCG;TCCTGCGGTTGCAGAGG	0.297163	0.228904	MACS_peak_2291	chr4	28353505	28354005	100	20	MACS_peak_2291	chr4	28353578	28353932	63.71	chr4-28353118-28353605	7.62712
chr20-52937643-52938181	chr20	52937643	52938181	TGAGGCTAGCGGGCTCG	0.548113	0.127383	MACS_peak_1954	chr20	52937123	52937773	130	20	MACS_peak_1954	chr20	52937097	52937798	63.93	chr20-52937643-52938181	22.1113
chr17-59699023-59699523	chr17	59699023	59699523	GGGGGGTCATGCGGCAC	-0.907606	0.0276779	MACS_peak_1334	chr17	59698351	59700851	500	20	MACS_peak_1334	chr17	59698322	59700879	82.32	chr17-59699023-59699523	19.5542
chr15-52955188-52955796	chr15	52955188	52955796	CTGCACGTTATGCCAGC	0.356992	0.266529	MACS_peak_1031	chr15	52955666	52956316	130	20	MACS_peak_1031	chr15	52955639	52956342	193.94	chr15-52955188-52955796	22.3329
chr14-21219313-21220025	chr14	21219313	21220025	AAGCTATCGCGGTTCCC	0.135624	0.777425	MACS_peak_870	chr14	21219925	21220425	100	20	no_overlap	.	.	.	.	.	.
chr20-53059283-53059924	chr20	53059283	53059924	GGCTTTTAGTACCTTTG	0.0614912	0.952105	MACS_peak_1956	chr20	53057263	53060463	641	20.0312	MACS_peak_1956	chr20	53057217	53060508	138.64	chr20-53059283-53059924	19.4774
chr17-59700350-59700925	chr17	59700350	59700925	CAGCTTGCGGTGCCGAG;GTGAAGCCACTCGGTGT	0.184911	0.707024	MACS_peak_1334	chr17	59698351	59700851	501	20.04	MACS_peak_1334	chr17	59698322	59700879	82.32	chr17-59700350-59700925	20.6883
chr17-59700350-59701046	chr17	59700350	59701046	GTGACTAATTGCCCATC	-0.68302	0.00357408	MACS_peak_1334	chr17	59698351	59700851	501	20.04	MACS_peak_1334	chr17	59698322	59700879	82.32	chr17-59700350-59701046	20.6883
chr17-59828147-59828699	chr17	59828147	59828699	AACCGAACACTGATCAC	-0.210217	0.523672	MACS_peak_1341	chr17	59826452	59829202	552	20.0727	MACS_peak_1341	chr17	59826412	59829241	63.66	chr17-59828147-59828699	19.5122
chr20-53364493-53365349	chr20	53364493	53365349	GCTTGGACGCTCGATAA	-0.417266	0.406256	MACS_peak_1959	chr20	53365088	53366388	261	20.0769	MACS_peak_1959	chr20	53365044	53366431	65.2	chr20-53364493-53365349	21.9899
chr17-59699238-59699740	chr17	59699238	59699740	GCCATGTTGGTGCATAA	0.0286845	0.953841	MACS_peak_1334	chr17	59698351	59700851	502	20.08	MACS_peak_1334	chr17	59698322	59700879	82.32	chr17-59699238-59699740	19.6324
chr20-53058134-53058777	chr20	53058134	53058777	GGACCAGGGAGCATAGG	-0.134093	0.840241	MACS_peak_1956	chr20	53057263	53060463	643	20.0938	MACS_peak_1956	chr20	53057217	53060508	138.64	chr20-53058134-53058777	19.5381
chr3-64820805-64821480	chr3	64820805	64821480	CGAGAAATAGGGAGGGA	-0.404855	0.514693	MACS_peak_2123	chr3	64821118	64822918	362	20.1111	MACS_peak_2123	chr3	64821081	64822955	121.49	chr3-64820805-64821480	21.2914
chr17-59699322-59699825	chr17	59699322	59699825	AGGCATGGACGTAGCGG	0.54241	0.23203	MACS_peak_1334	chr17	59698351	59700851	503	20.12	MACS_peak_1334	chr17	59698322	59700879	82.32	chr17-59699322-59699825	19.6715
chr17-59700348-59701037	chr17	59700348	59701037	GCGTGGGGGGGCGGGCG	-0.651626	0.364455	MACS_peak_1334	chr17	59698351	59700851	503	20.12	MACS_peak_1334	chr17	59698322	59700879	82.32	chr17-59700348-59701037	20.7665
chr17-59698456-59698961	chr17	59698456	59698961	GTAACCGCAATCTGACC;CGCGTGGTTGCGGGGTG	0.023284	0.92199	MACS_peak_1334	chr17	59698351	59700851	505	20.2	MACS_peak_1334	chr17	59698322	59700879	82.32	chr17-59698456-59698961	19.7497
chr4-137845952-137846537	chr4	137845952	137846537	ATACTGCATCGAGGGCG	0.403032	0.0741177	MACS_peak_2397	chr4	137845553	137846053	101	20.2	no_overlap	.	.	.	.	.	.
chr17-59828212-59828768	chr17	59828212	59828768	TGGTGATTTACGGGTAA	-0.649276	0.0998939	MACS_peak_1341	chr17	59826452	59829202	556	20.2182	MACS_peak_1341	chr17	59826412	59829241	63.66	chr17-59828212-59828768	19.6536
chr17-59828504-59829061	chr17	59828504	59829061	TCGAGTGCAATGTACGG;GGTCGGAGCAACATGTG	-0.105678	0.862002	MACS_peak_1341	chr17	59826452	59829202	557	20.2545	MACS_peak_1341	chr17	59826412	59829241	63.66	chr17-59828504-59829061	19.6889
chr17-59703107-59703716	chr17	59703107	59703716	CGCTAGCAGTAGAGGGC	-1.01214	0.0798951	MACS_peak_1335	chr17	59703280	59705430	436	20.2791	MACS_peak_1335	chr17	59703249	59705461	147.58	chr17-59703107-59703716	21.1121
chr17-59703026-59703716	chr17	59703026	59703716	CAGTTTACAAGAGTGGC	-0.0104954	0.982625	MACS_peak_1335	chr17	59703280	59705430	436	20.2791	MACS_peak_1335	chr17	59703249	59705461	147.58	chr17-59703026-59703716	21.1121
chr17-59698452-59698959	chr17	59698452	59698959	CAGGGTGATTCGGGGGT	0.20346	0.572787	MACS_peak_1334	chr17	59698351	59700851	507	20.28	MACS_peak_1334	chr17	59698322	59700879	82.32	chr17-59698452-59698959	19.8279
chr17-59827763-59828321	chr17	59827763	59828321	AGTCCAAGGGACGTGGG;GAAGCGGAAGGCGTAGT;GTGCAGTTGTTGGAGGG	-0.239443	0.693855	MACS_peak_1341	chr17	59826452	59829202	558	20.2909	MACS_peak_1341	chr17	59826412	59829241	63.66	chr17-59827763-59828321	19.7243
chr20-53396787-53397193	chr20	53396787	53397193	TAATGTTGAAGTCGGAG	-0.703464	0.140971	MACS_peak_1960	chr20	53396079	53398079	406	20.3	MACS_peak_1960	chr20	53396048	53398110	79.03	chr20-53396787-53397193	19.6896
chr17-59702863-59703717	chr17	59702863	59703717	GGGAAGGGCGGGGCCGG;TTGCGTTTTCAACGCGA	-1.15929	0.00369463	MACS_peak_1335	chr17	59703280	59705430	437	20.3256	MACS_peak_1335	chr17	59703249	59705461	147.58	chr17-59702863-59703717	21.1573
chr20-53058995-53059646	chr20	53058995	53059646	TGGACCGTAGAATACAT	0.304913	0.181184	MACS_peak_1956	chr20	53057263	53060463	651	20.3438	MACS_peak_1956	chr20	53057217	53060508	138.64	chr20-53058995-53059646	19.7812
chr17-59827820-59828380	chr17	59827820	59828380	GTCGTGTCAGTGCGCAT	1.51569	0.000108607	MACS_peak_1341	chr17	59826452	59829202	560	20.3636	MACS_peak_1341	chr17	59826412	59829241	63.66	chr17-59827820-59828380	19.795
chr17-59828111-59828671	chr17	59828111	59828671	CATGTGTCCTGGAGCCA	-0.324756	0.313014	MACS_peak_1341	chr17	59826452	59829202	560	20.3636	MACS_peak_1341	chr17	59826412	59829241	63.66	chr17-59828111-59828671	19.795
chr20-53059098-53059750	chr20	53059098	53059750	GTTGGCAATGGGCCGGC	0.255105	0.334593	MACS_peak_1956	chr20	53057263	53060463	652	20.375	MACS_peak_1956	chr20	53057217	53060508	138.64	chr20-53059098-53059750	19.8116
chr17-59828200-59828761	chr17	59828200	59828761	GGCAGCGTGTTGTGGTT	-0.229291	0.597288	MACS_peak_1341	chr17	59826452	59829202	561	20.4	MACS_peak_1341	chr17	59826412	59829241	63.66	chr17-59828200-59828761	19.8303
chr1-114878323-114878966	chr1	114878323	114878966	TGTAGGTTCCACCACGG	-0.986498	0.119285	MACS_peak_116	chr1	114878864	114879364	102	20.4	MACS_peak_116	chr1	114878869	114879358	78.08	chr1-114878323-114878966	19.8364
chr5-41497240-41497792	chr5	41497240	41497792	TGATGGAGTGTAAGGGG	-0.00388169	0.993501	MACS_peak_2500	chr5	41496842	41497342	102	20.4	no_overlap	.	.	.	.	.	.
chr17-59699314-59699826	chr17	59699314	59699826	GTGTTGAGAACGGATGG	0.0378929	0.958573	MACS_peak_1334	chr17	59698351	59700851	512	20.48	MACS_peak_1334	chr17	59698322	59700879	82.32	chr17-59699314-59699826	20.0235
chr3-63995007-63995825	chr3	63995007	63995825	AGTAGTGTGGGGCGGTA	-0.363853	0.447188	MACS_peak_2121	chr3	63995558	63996858	267	20.5385	MACS_peak_2121	chr3	63995518	63996897	66.06	chr3-63995007-63995825	22.2625
chr17-59827542-59828107	chr17	59827542	59828107	TAGGAAGGGGCAGGTGG	-0.17907	0.633906	MACS_peak_1341	chr17	59826452	59829202	565	20.5455	MACS_peak_1341	chr17	59826412	59829241	63.66	chr17-59827542-59828107	19.9717
chr17-59698667-59699181	chr17	59698667	59699181	AACGTCCGGCCGTGACT	0.149121	0.652679	MACS_peak_1334	chr17	59698351	59700851	514	20.56	MACS_peak_1334	chr17	59698322	59700879	82.32	chr17-59698667-59699181	20.1017
chr17-59699278-59699792	chr17	59699278	59699792	AAATAGGTATGTGCCAC	-0.649875	0.161356	MACS_peak_1334	chr17	59698351	59700851	514	20.56	MACS_peak_1334	chr17	59698322	59700879	82.32	chr17-59699278-59699792	20.1017
chr20-53057605-53058263	chr20	53057605	53058263	TCATGCCCTAATGGTGA	-0.362852	0.216026	MACS_peak_1956	chr20	53057263	53060463	658	20.5625	MACS_peak_1956	chr20	53057217	53060508	138.64	chr20-53057605-53058263	19.9939
chr5-42597897-42598387	chr5	42597897	42598387	GGTTCGATGGCTCTGAA	0.35619	0.388576	MACS_peak_2512	chr5	42598284	42598784	103	20.6	MACS_peak_2512	chr5	42598328	42598740	159.45	chr5-42597897-42598387	14.3204
chr15-53380005-53380484	chr15	53380005	53380484	CCATGAAATGGGGGCAG	-0.754149	0.108494	MACS_peak_1034	chr15	53379608	53380108	103	20.6	MACS_peak_1034	chr15	53379693	53380022	61.49	chr15-53380005-53380484	5.16717
chr17-59703469-59703912	chr17	59703469	59703912	TAGATAAGAGAGGGGGC	0.185493	0.754282	MACS_peak_1335	chr17	59703280	59705430	443	20.6047	MACS_peak_1335	chr17	59703249	59705461	147.58	chr17-59703469-59703912	20.0271
chr17-59700127-59700643	chr17	59700127	59700643	GACGACGGGACCGGGGC;TGTACCGGTTAGGACGT	-0.0627419	0.772493	MACS_peak_1334	chr17	59698351	59700851	516	20.64	MACS_peak_1334	chr17	59698322	59700879	82.32	chr17-59700127-59700643	20.1799
chr17-59827898-59828466	chr17	59827898	59828466	ATGGGCAGTAGATCAAT	-0.00609789	0.989769	MACS_peak_1341	chr17	59826452	59829202	568	20.6545	MACS_peak_1341	chr17	59826412	59829241	63.66	chr17-59827898-59828466	20.0778
chr17-59700199-59700716	chr17	59700199	59700716	GGGCGGGAGCAAGATGG	-0.121812	0.85197	MACS_peak_1334	chr17	59698351	59700851	517	20.68	MACS_peak_1334	chr17	59698322	59700879	82.32	chr17-59700199-59700716	20.219
chr17-59703131-59703725	chr17	59703131	59703725	GGGCCCGTCGCGGGGGG	-1.40447	0.00278764	MACS_peak_1335	chr17	59703280	59705430	445	20.6977	MACS_peak_1335	chr17	59703249	59705461	147.58	chr17-59703131-59703725	21.519
chr17-59827909-59828479	chr17	59827909	59828479	GTGGGGCCGACGGGTTG;CTGGTGACTAATCTGCG	-0.661329	0.0778497	MACS_peak_1341	chr17	59826452	59829202	570	20.7273	MACS_peak_1341	chr17	59826412	59829241	63.66	chr17-59827909-59828479	20.1485
chr17-59827948-59828519	chr17	59827948	59828519	TAGATGGAAGTAATACG	0.384236	0.382015	MACS_peak_1341	chr17	59826452	59829202	571	20.7636	MACS_peak_1341	chr17	59826412	59829241	63.66	chr17-59827948-59828519	20.1838
chr17-59698287-59698871	chr17	59698287	59698871	CACACGCAGGGGGGTGA	-0.338155	0.470371	MACS_peak_1334	chr17	59698351	59700851	520	20.8	MACS_peak_1334	chr17	59698322	59700879	82.32	chr17-59698287-59698871	21.4705
chr17-59699312-59699832	chr17	59699312	59699832	GAGACGAGTCGCACGGT	0.0360093	0.938633	MACS_peak_1334	chr17	59698351	59700851	520	20.8	MACS_peak_1334	chr17	59698322	59700879	82.32	chr17-59699312-59699832	20.3363
chr3-64822543-64823309	chr3	64822543	64823309	TAAAAGTTGGGTAGGGG	1.66079	1.7028e-05	MACS_peak_2123	chr3	64821118	64822918	375	20.8333	MACS_peak_2123	chr3	64821081	64822955	121.49	chr3-64822543-64823309	21.9851
chr17-59698424-59698945	chr17	59698424	59698945	GGGCTTTCTTCAATTTA	-0.682725	0.22938	MACS_peak_1334	chr17	59698351	59700851	521	20.84	MACS_peak_1334	chr17	59698322	59700879	82.32	chr17-59698424-59698945	20.3754
chr17-59699298-59699819	chr17	59699298	59699819	CGTTTAGCAGTTATTAT	-0.282634	0.462365	MACS_peak_1334	chr17	59698351	59700851	521	20.84	MACS_peak_1334	chr17	59698322	59700879	82.32	chr17-59699298-59699819	20.3754
chr20-53366117-53366580	chr20	53366117	53366580	CGGAAGAAGTAACACGG	-1.19346	0.000211206	MACS_peak_1959	chr20	53365088	53366388	271	20.8462	MACS_peak_1959	chr20	53365044	53366431	65.2	chr20-53366117-53366580	22.6388
chr17-59699146-59699668	chr17	59699146	59699668	GACCCACGTGTCTGTGG;GGAGGTGGGTTGGGGGG	0.188435	0.0589685	MACS_peak_1334	chr17	59698351	59700851	522	20.88	MACS_peak_1334	chr17	59698322	59700879	82.32	chr17-59699146-59699668	20.4145
chr3-1111127-1111571	chr3	1111127	1111571	CCAAACAGTGTAGTTTG	0.0166699	0.976784	MACS_peak_2039	chr3	1110732	1111232	105	21	MACS_peak_2039	chr3	1110766	1111198	175.28	chr3-1111127-1111571	16.4352
chr17-59698136-59698876	chr17	59698136	59698876	TTGTAGGGACCCAGAGA	-0.0372743	0.948343	MACS_peak_1334	chr17	59698351	59700851	525	21	MACS_peak_1334	chr17	59698322	59700879	82.32	chr17-59698136-59698876	21.666
chr2-91620595-91621327	chr2	91620595	91621327	TTGCGTTACGTTCGTCG	0.44891	0.424294	neg_region_53	chr2	91620200	91620700	105	21	no_overlap	.	.	.	.	.	.
chr20-53057978-53058653	chr20	53057978	53058653	ATTTCCTACTGGATCGT	0.0678553	0.953339	MACS_peak_1956	chr20	53057263	53060463	675	21.0938	MACS_peak_1956	chr20	53057217	53060508	138.64	chr20-53057978-53058653	20.5105
chr17-59698492-59699020	chr17	59698492	59699020	TTGGGAGGGGGCGAGTG	0.568752	0.139325	MACS_peak_1334	chr17	59698351	59700851	528	21.12	MACS_peak_1334	chr17	59698322	59700879	82.32	chr17-59698492-59699020	20.6492
chr17-59827305-59827888	chr17	59827305	59827888	GTAGCCATGATGTCGTA	-0.267796	0.502431	MACS_peak_1341	chr17	59826452	59829202	583	21.2	MACS_peak_1341	chr17	59826412	59829241	63.66	chr17-59827305-59827888	20.608
chr17-59699553-59700083	chr17	59699553	59700083	GATAGAGTTCAGGGCGG	2.40619	7.11153e-14	MACS_peak_1334	chr17	59698351	59700851	530	21.2	MACS_peak_1334	chr17	59698322	59700879	82.32	chr17-59699553-59700083	20.7274
chr3-78428143-78428823	chr3	78428143	78428823	GTCGTGCTGTCGGTCCG;GATACAATTTGCGCGGC	-0.659292	0.0462417	MACS_peak_2137	chr3	78428717	78429217	106	21.2	no_overlap	.	.	.	.	.	.
chr20-53366112-53366616	chr20	53366112	53366616	TTGCAAGGTTTTAGGAT	-0.272423	0.60154	MACS_peak_1959	chr20	53365088	53366388	276	21.2308	MACS_peak_1959	chr20	53365044	53366431	65.2	chr20-53366112-53366616	22.9993
chr17-59827493-59828077	chr17	59827493	59828077	AGGGGGCAGCGGTGGGG	-0.137802	0.716574	MACS_peak_1341	chr17	59826452	59829202	584	21.2364	MACS_peak_1341	chr17	59826412	59829241	63.66	chr17-59827493-59828077	20.6433
chr17-59698273-59698882	chr17	59698273	59698882	ATCCCGTCTGCGCACAG	0.0490192	0.945081	MACS_peak_1334	chr17	59698351	59700851	531	21.24	MACS_peak_1334	chr17	59698322	59700879	82.32	chr17-59698273-59698882	21.9007
chr17-59703047-59703737	chr17	59703047	59703737	GGGGTACTGTCGCGGGA	-0.898634	0.0979198	MACS_peak_1335	chr17	59703280	59705430	457	21.2558	MACS_peak_1335	chr17	59703249	59705461	147.58	chr17-59703047-59703737	22.0615
chr17-59827217-59827802	chr17	59827217	59827802	CGTTCATTAGCGGGATA;CGAGGTGATTAGTGAGG	0.296822	0.141991	MACS_peak_1341	chr17	59826452	59829202	585	21.2727	MACS_peak_1341	chr17	59826412	59829241	63.66	chr17-59827217-59827802	20.6787
chr17-59828136-59828721	chr17	59828136	59828721	TTGGCGGGGCACGGGGG;TGTGGCGGTGCAGCTGG	0.0729636	0.942406	MACS_peak_1341	chr17	59826452	59829202	585	21.2727	MACS_peak_1341	chr17	59826412	59829241	63.66	chr17-59828136-59828721	20.6787
chr20-53059273-53059954	chr20	53059273	53059954	GGATTAGGTCCGTTGGA;GTGGGTCATGATCAAAT;TGAGACCGATACGATGG	0.126777	0.934858	MACS_peak_1956	chr20	53057263	53060463	681	21.2812	MACS_peak_1956	chr20	53057217	53060508	138.64	chr20-53059273-53059954	20.6928
chr17-59828616-59829313	chr17	59828616	59829313	GGGTTTGGGGAGGGACG;ATCGCCTGGGCGACTCC	-0.281983	0.0222002	MACS_peak_1341	chr17	59826452	59829202	586	21.3091	MACS_peak_1341	chr17	59826412	59829241	63.66	chr17-59828616-59829313	22.0926
chr17-59698686-59699219	chr17	59698686	59699219	CGGTTCAGCACGGGTGT	0.262004	0.701617	MACS_peak_1334	chr17	59698351	59700851	533	21.32	MACS_peak_1334	chr17	59698322	59700879	82.32	chr17-59698686-59699219	20.8447
chr17-59699043-59699576	chr17	59699043	59699576	GTGGGCCTCGGGTGGTG;GCTGGGGTTGAGGGGTG	-0.60286	0.00977387	MACS_peak_1334	chr17	59698351	59700851	533	21.32	MACS_peak_1334	chr17	59698322	59700879	82.32	chr17-59699043-59699576	20.8447
chr17-59827132-59827719	chr17	59827132	59827719	TGTGTTCAGGCCAAGTC	-0.396859	0.34373	MACS_peak_1341	chr17	59826452	59829202	587	21.3455	MACS_peak_1341	chr17	59826412	59829241	63.66	chr17-59827132-59827719	20.7494
chr17-59827143-59827731	chr17	59827143	59827731	AATCGCGCTCGCGAGGC	0.24166	0.338752	MACS_peak_1341	chr17	59826452	59829202	588	21.3818	MACS_peak_1341	chr17	59826412	59829241	63.66	chr17-59827143-59827731	20.7847
chr20-53366110-53366667	chr20	53366110	53366667	ATTCCGGTTTTCGATGA	-0.843522	0.101094	MACS_peak_1959	chr20	53365088	53366388	278	21.3846	MACS_peak_1959	chr20	53365044	53366431	65.2	chr20-53366110-53366667	23.1435
chr1-144011015-144011632	chr1	144011015	144011632	AAGCTGAGTACGAAGCT	0.408169	0.561244	MACS_peak_125	chr1	144010465	144011165	150	21.4286	MACS_peak_125	chr1	144010426	144011203	496.63	chr1-144011015-144011632	24.1956
chr17-59700006-59700542	chr17	59700006	59700542	TCGCCCCCATGGCTCAT	-0.182688	0.689471	MACS_peak_1334	chr17	59698351	59700851	536	21.44	MACS_peak_1334	chr17	59698322	59700879	82.32	chr17-59700006-59700542	20.9621
chr17-59827132-59827723	chr17	59827132	59827723	GCGGCGCCGTTGCGGCA	-0.560176	0.0644811	MACS_peak_1341	chr17	59826452	59829202	591	21.4909	MACS_peak_1341	chr17	59826412	59829241	63.66	chr17-59827132-59827723	20.8908
chr17-59704918-59705381	chr17	59704918	59705381	GCCATAGTCTGGGAGAG	-0.280453	0.587411	MACS_peak_1335	chr17	59703280	59705430	463	21.5349	MACS_peak_1335	chr17	59703249	59705461	147.58	chr17-59704918-59705381	20.9313
chr17-59699413-59699952	chr17	59699413	59699952	GCCGGCGCCATTGCTAC	1.7814	7.3115e-07	MACS_peak_1334	chr17	59698351	59700851	539	21.56	MACS_peak_1334	chr17	59698322	59700879	82.32	chr17-59699413-59699952	21.0794
chr17-59699237-59699776	chr17	59699237	59699776	CGCACCACATTGCTGGT	0.331967	0.411352	MACS_peak_1334	chr17	59698351	59700851	539	21.56	MACS_peak_1334	chr17	59698322	59700879	82.32	chr17-59699237-59699776	21.0794
chr17-59827302-59827896	chr17	59827302	59827896	AACAGCCTAGAAATGGG	-0.177486	0.774713	MACS_peak_1341	chr17	59826452	59829202	594	21.6	MACS_peak_1341	chr17	59826412	59829241	63.66	chr17-59827302-59827896	20.9968
chr17-59699468-59700008	chr17	59699468	59700008	ATTCGGCGGTCTACAAA	1.54092	8.0083e-07	MACS_peak_1334	chr17	59698351	59700851	540	21.6	MACS_peak_1334	chr17	59698322	59700879	82.32	chr17-59699468-59700008	21.1185
chr17-59699198-59699738	chr17	59699198	59699738	GCCCGGGCGGCATGCTG	0.355674	0.395419	MACS_peak_1334	chr17	59698351	59700851	540	21.6	MACS_peak_1334	chr17	59698322	59700879	82.32	chr17-59699198-59699738	21.1185
chr17-59698563-59699103	chr17	59698563	59699103	TATGGGTGGTCGTTGTT	-0.376666	0.166923	MACS_peak_1334	chr17	59698351	59700851	540	21.6	MACS_peak_1334	chr17	59698322	59700879	82.32	chr17-59698563-59699103	21.1185
chr17-80572514-80573017	chr17	80572514	80573017	GGGGTGATCGTGTGGTG	-0.630836	0.318259	MACS_peak_1403	chr17	80572122	80572622	108	21.6	no_overlap	.	.	.	.	.	.
chr3-64820948-64821507	chr3	64820948	64821507	TTTGTACTAGATGTATG;ATTTCGCAGGGTCTCCA	-0.781192	0.0057825	MACS_peak_2123	chr3	64821118	64822918	389	21.6111	MACS_peak_2123	chr3	64821081	64822955	121.49	chr3-64820948-64821507	22.7321
chr17-59698468-59699010	chr17	59698468	59699010	AATTCCTGAGCGCGTCG	0.013667	0.989136	MACS_peak_1334	chr17	59698351	59700851	542	21.68	MACS_peak_1334	chr17	59698322	59700879	82.32	chr17-59698468-59699010	21.1967
chr17-59698838-59699380	chr17	59698838	59699380	ACTTGGGGGAAGGGGTT	-0.0656414	0.8843	MACS_peak_1334	chr17	59698351	59700851	542	21.68	MACS_peak_1334	chr17	59698322	59700879	82.32	chr17-59698838-59699380	21.1967
chr3-63995233-63995840	chr3	63995233	63995840	GGAGGGTCAAGGCTATG	0.0657409	0.90399	MACS_peak_2121	chr3	63995558	63996858	282	21.6923	MACS_peak_2121	chr3	63995518	63996897	66.06	chr3-63995233-63995840	23.3503
chr17-59827275-59827872	chr17	59827275	59827872	TCATTAGCTCTTTGACG	0.87521	0.0791842	MACS_peak_1341	chr17	59826452	59829202	597	21.7091	MACS_peak_1341	chr17	59826412	59829241	63.66	chr17-59827275-59827872	21.1029
chr17-59699532-59700075	chr17	59699532	59700075	TGCCGTCGGACAAAGGC	1.38416	0.00298321	MACS_peak_1334	chr17	59698351	59700851	543	21.72	MACS_peak_1334	chr17	59698322	59700879	82.32	chr17-59699532-59700075	21.2358
chr17-59700104-59700647	chr17	59700104	59700647	TGCGAAGCAAGAGGGGG	-0.332388	0.604986	MACS_peak_1334	chr17	59698351	59700851	543	21.72	MACS_peak_1334	chr17	59698322	59700879	82.32	chr17-59700104-59700647	21.2358
chr17-59698969-59699512	chr17	59698969	59699512	GTGCAGAAAAGGGTTGG	0.0422984	0.928028	MACS_peak_1334	chr17	59698351	59700851	543	21.72	MACS_peak_1334	chr17	59698322	59700879	82.32	chr17-59698969-59699512	21.2358
chr17-59700199-59700743	chr17	59700199	59700743	TAAAGGGGATAACTTGG	0.219313	0.682459	MACS_peak_1334	chr17	59698351	59700851	544	21.76	MACS_peak_1334	chr17	59698322	59700879	82.32	chr17-59700199-59700743	21.2749
chr7-18459738-18460553	chr7	18459738	18460553	CCCCAAGTGCCCGTGGC	-0.0294265	0.9536	MACS_peak_3104	chr7	18460444	18460944	109	21.8	MACS_peak_3104	chr7	18460409	18460978	251.94	chr7-18459738-18460553	25.3076
chr14-69455328-69456147	chr14	69455328	69456147	AATGGGCTACGGAAATG	0.0445406	0.945878	MACS_peak_935	chr14	69454937	69455437	109	21.8	MACS_peak_935	chr14	69454938	69455435	104.02	chr14-69455328-69456147	21.5292
chr1-83477318-83477719	chr1	83477318	83477719	AGGCCCGGTTGCCGCAT	0.0336817	0.938513	MACS_peak_82	chr1	83476927	83477427	109	21.8	no_overlap	.	.	.	.	.	.
chr11-84969404-84969946	chr11	84969404	84969946	TCTTATTGGAGTCCGTA	0.0163811	0.978207	MACS_peak_565	chr11	84969013	84969513	109	21.8	no_overlap	.	.	.	.	.	.
chr7-136912732-136913292	chr7	136912732	136913292	AAGGTCCTAGGTGGCGT	0.949826	0.000486447	MACS_peak_3214	chr7	136912341	136912841	109	21.8	no_overlap	.	.	.	.	.	.
chr7-136912732-136913293	chr7	136912732	136913293	TGCGGGGTTTGATGCAG	-0.766024	0.126907	MACS_peak_3214	chr7	136912341	136912841	109	21.8	no_overlap	.	.	.	.	.	.
chr16-12631886-12632367	chr16	12631886	12632367	GGGGCCGCGGGCGGCAA	-0.0029404	0.996172	MACS_peak_1133	chr16	12632258	12632758	109	21.8	no_overlap	.	.	.	.	.	.
chr3-64822524-64823045	chr3	64822524	64823045	TAGATATGGCAAAGACG	0.864194	3.10816e-06	MACS_peak_2123	chr3	64821118	64822918	394	21.8889	MACS_peak_2123	chr3	64821081	64822955	121.49	chr3-64822524-64823045	22.9989
chr17-59703677-59704148	chr17	59703677	59704148	GAGGGGCCGCAGGGGGC	-0.243059	0.639883	MACS_peak_1335	chr17	59703280	59705430	471	21.907	MACS_peak_1335	chr17	59703249	59705461	147.58	chr17-59703677-59704148	21.2929
chr20-53059137-53059839	chr20	53059137	53059839	GAATTGGTAGTCCCGCG	0.510094	0.202628	MACS_peak_1956	chr20	53057263	53060463	702	21.9375	MACS_peak_1956	chr20	53057217	53060508	138.64	chr20-53059137-53059839	21.3309
chr17-59703063-59703752	chr17	59703063	59703752	CTAGCTCCTTGGTATCC	-1.23795	0.0178029	MACS_peak_1335	chr17	59703280	59705430	472	21.9535	MACS_peak_1335	chr17	59703249	59705461	147.58	chr17-59703063-59703752	22.7396
chr3-64821275-64821671	chr3	64821275	64821671	TCCATGTTCGGTACGTT	-0.0191093	0.973717	MACS_peak_2123	chr3	64821118	64822918	396	22	MACS_peak_2123	chr3	64821081	64822955	121.49	chr3-64821275-64821671	21.1313
chr20-29647538-29648148	chr20	29647538	29648148	GTGAATCCAAGTTAAGG	-0.800715	0.00287244	MACS_peak_1925	chr20	29648038	29648538	110	22	MACS_peak_1925	chr20	29647999	29648576	66.67	chr20-29647538-29648148	25.8232
chr15-53935686-53936165	chr15	53935686	53936165	GTAGCGGAGTGAGGTCT;CACCTCCGTGGCGGGTT	0.110735	0.819032	MACS_peak_1037	chr15	53936055	53936555	110	22	MACS_peak_1037	chr15	53936131	53936479	65.54	chr15-53935686-53936165	9.77011
chr11-83373074-83373704	chr11	83373074	83373704	CGCTGCAGCGGTATTGA	0.119232	0.788088	MACS_peak_559	chr11	83372684	83373184	110	22	MACS_peak_559	chr11	83372775	83373093	88.08	chr11-83373074-83373704	5.97484
chr17-59699096-59699649	chr17	59699096	59699649	GTTCGCGGTGCGGGGAT	-0.928156	4.72227e-07	MACS_peak_1334	chr17	59698351	59700851	553	22.12	MACS_peak_1334	chr17	59698322	59700879	82.32	chr17-59699096-59699649	21.6269
chr17-59700298-59700905	chr17	59700298	59700905	GAGGAGAGGAGCGCAGG	-0.0474564	0.94734	MACS_peak_1334	chr17	59698351	59700851	553	22.12	MACS_peak_1334	chr17	59698322	59700879	82.32	chr17-59700298-59700905	22.7219
chr20-53057976-53058686	chr20	53057976	53058686	GTACTAGACCAGACGAT	0.0631854	0.956343	MACS_peak_1956	chr20	53057263	53060463	710	22.1875	MACS_peak_1956	chr20	53057217	53060508	138.64	chr20-53057976-53058686	21.574
chr12-82164042-82164564	chr12	82164042	82164564	TGCAACGATAGTAGTGT	0.300756	0.371561	MACS_peak_738	chr12	82164453	82164953	111	22.2	no_overlap	.	.	.	.	.	.
chr20-53058152-53058863	chr20	53058152	53058863	TGGGGAAGTCGGCGGAA	0.597737	0.0200948	MACS_peak_1956	chr20	53057263	53060463	711	22.2188	MACS_peak_1956	chr20	53057217	53060508	138.64	chr20-53058152-53058863	21.6044
chr17-59704582-59705060	chr17	59704582	59705060	GACAGGGCCTTAAAAGT	0.185205	0.730017	MACS_peak_1335	chr17	59703280	59705430	478	22.2326	MACS_peak_1335	chr17	59703249	59705461	147.58	chr17-59704582-59705060	21.6094
chr17-59703248-59703759	chr17	59703248	59703759	CGGGCATGGGTCCTTCC	-1.14722	0.00853756	MACS_peak_1335	chr17	59703280	59705430	479	22.2791	MACS_peak_1335	chr17	59703249	59705461	147.58	chr17-59703248-59703759	23.0561
chr17-59699197-59699754	chr17	59699197	59699754	CAGGCTTTGGGGGACAG	0.310166	0.626143	MACS_peak_1334	chr17	59698351	59700851	557	22.28	MACS_peak_1334	chr17	59698322	59700879	82.32	chr17-59699197-59699754	21.7833
chr17-59828205-59828818	chr17	59828205	59828818	CAGGGGTAGAGTGCCGG;CTGATTTGAGGACGAGC	0.11231	0.901771	MACS_peak_1341	chr17	59826452	59829202	613	22.2909	MACS_peak_1341	chr17	59826412	59829241	63.66	chr17-59828205-59828818	21.6684
chr20-53057599-53058313	chr20	53057599	53058313	AGACTGTATTGCGATAG	0.143646	0.862132	MACS_peak_1956	chr20	53057263	53060463	714	22.3125	MACS_peak_1956	chr20	53057217	53060508	138.64	chr20-53057599-53058313	21.6955
chr20-53059231-53059945	chr20	53059231	53059945	GGCGTTGGGAGACGTAC	0.45515	0.343508	MACS_peak_1956	chr20	53057263	53060463	714	22.3125	MACS_peak_1956	chr20	53057217	53060508	138.64	chr20-53059231-53059945	21.6955
chr17-59699024-59699582	chr17	59699024	59699582	TTAAGGTTGTTGTGAGG;GTTGGGGGCTGGAGGAG	-0.351982	0.423695	MACS_peak_1334	chr17	59698351	59700851	558	22.32	MACS_peak_1334	chr17	59698322	59700879	82.32	chr17-59699024-59699582	21.8224
chr17-59826999-59827613	chr17	59826999	59827613	TTGGCTTTGTTACATTC	-0.152835	0.782053	MACS_peak_1341	chr17	59826452	59829202	614	22.3273	MACS_peak_1341	chr17	59826412	59829241	63.66	chr17-59826999-59827613	21.7038
chr20-53059467-53060182	chr20	53059467	53060182	GGGAGGGGCATAGGGAG	0.0929521	0.907868	MACS_peak_1956	chr20	53057263	53060463	715	22.3438	MACS_peak_1956	chr20	53057217	53060508	138.64	chr20-53059467-53060182	21.7259
chr20-53059080-53059796	chr20	53059080	53059796	AAGCTACGGTGCCTCGG	0.334844	0.494801	MACS_peak_1956	chr20	53057263	53060463	716	22.375	MACS_peak_1956	chr20	53057217	53060508	138.64	chr20-53059080-53059796	21.7563
chr17-59699369-59699929	chr17	59699369	59699929	GTGGAGGCCGGTAAATA	2.78134	1.91446e-08	MACS_peak_1334	chr17	59698351	59700851	560	22.4	MACS_peak_1334	chr17	59698322	59700879	82.32	chr17-59699369-59699929	21.9007
chr1-35650183-35650886	chr1	35650183	35650886	GTCTAGTAGCGACTAAA;AGGGCTACTGTGAAGGC	-0.00312527	0.977074	MACS_peak_32	chr1	35649795	35650295	112	22.4	MACS_peak_32	chr1	35649863	35650226	89.85	chr1-35650183-35650886	11.8457
chr5-152192015-152192760	chr5	152192015	152192760	GGCACTGGCGGAGAGGG	0.378862	0.302247	MACS_peak_2782	chr5	152191627	152192127	112	22.4	no_overlap	.	.	.	.	.	.
chr2-2963270-2963762	chr2	2963270	2963762	AGGACGTCGTGCCTCCC	0.0200015	0.97967	MACS_peak_1561	chr2	2963650	2964150	112	22.4	no_overlap	.	.	.	.	.	.
chr3-63996566-63997207	chr3	63996566	63997207	TAGGAAGGGGGGCAGGG	0.0872446	0.813741	MACS_peak_2121	chr3	63995558	63996858	292	22.4615	MACS_peak_2121	chr3	63995518	63996897	66.06	chr3-63996566-63997207	24.0029
chr20-53057529-53058249	chr20	53057529	53058249	ACGCCGCAGGCAAGGGC	0.311546	0.519436	MACS_peak_1956	chr20	53057263	53060463	720	22.5	MACS_peak_1956	chr20	53057217	53060508	138.64	chr20-53057529-53058249	21.8778
chr17-59827727-59828346	chr17	59827727	59828346	AAGGTGGTTGTAACCAT;ATGGGCTGGTTCTAAAC	-0.308321	0.163173	MACS_peak_1341	chr17	59826452	59829202	619	22.5091	MACS_peak_1341	chr17	59826412	59829241	63.66	chr17-59827727-59828346	21.8805
chr17-59703063-59703764	chr17	59703063	59703764	CAGGGCATGTGGACCCC	-0.905447	0.00510874	MACS_peak_1335	chr17	59703280	59705430	484	22.5116	MACS_peak_1335	chr17	59703249	59705461	147.58	chr17-59703063-59703764	23.2821
chr17-59827008-59827628	chr17	59827008	59827628	TTGTGGAGGACTCACAT	-0.146068	0.715509	MACS_peak_1341	chr17	59826452	59829202	620	22.5455	MACS_peak_1341	chr17	59826412	59829241	63.66	chr17-59827008-59827628	21.9159
chr17-59699960-59700524	chr17	59699960	59700524	CCACAGAATTTCTTGGG	-0.123518	0.821876	MACS_peak_1334	chr17	59698351	59700851	564	22.56	MACS_peak_1334	chr17	59698322	59700879	82.32	chr17-59699960-59700524	22.0571
chr17-59699490-59700055	chr17	59699490	59700055	GAGGGCGATAGGGCGTG;AAGCTACACGGTGTGGC	1.642	7.83709e-09	MACS_peak_1334	chr17	59698351	59700851	565	22.6	MACS_peak_1334	chr17	59698322	59700879	82.32	chr17-59699490-59700055	22.0962
chr17-59700189-59700754	chr17	59700189	59700754	ATGCAATTTGTCAGCAT;TGCCATCGTGTATACGT	-0.195065	0.00684131	MACS_peak_1334	chr17	59698351	59700851	565	22.6	MACS_peak_1334	chr17	59698322	59700879	82.32	chr17-59700189-59700754	22.0962
chr17-59700073-59700638	chr17	59700073	59700638	CGGGACCAAGGCGGGGG	0.0291738	0.971293	MACS_peak_1334	chr17	59698351	59700851	565	22.6	MACS_peak_1334	chr17	59698322	59700879	82.32	chr17-59700073-59700638	22.0962
chr11-62340240-62340736	chr11	62340240	62340736	TGTGATGGCGTATGGGG	0.176645	0.707915	MACS_peak_506	chr11	62339853	62340353	113	22.6	no_overlap	.	.	.	.	.	.
chr17-59827437-59828059	chr17	59827437	59828059	TTACCTCGTCGCCGGGG	-0.208268	0.432313	MACS_peak_1341	chr17	59826452	59829202	622	22.6182	MACS_peak_1341	chr17	59826412	59829241	63.66	chr17-59827437-59828059	21.9866
chr17-59698632-59699198	chr17	59698632	59699198	TGGGACGGATCTAATGT	0.342201	0.553371	MACS_peak_1334	chr17	59698351	59700851	566	22.64	MACS_peak_1334	chr17	59698322	59700879	82.32	chr17-59698632-59699198	22.1353
chr17-59698143-59698918	chr17	59698143	59698918	GCAATGTTGTGGAGGGG	0.0811103	0.878166	MACS_peak_1334	chr17	59698351	59700851	567	22.68	MACS_peak_1334	chr17	59698322	59700879	82.32	chr17-59698143-59698918	23.3086
chr20-53395885-53396533	chr20	53395885	53396533	CGGCCGGTCGTGAGCCG	0.0748288	0.881573	MACS_peak_1960	chr20	53396079	53398079	454	22.7	MACS_peak_1960	chr20	53396048	53398110	79.03	chr20-53395885-53396533	23.5209
chr20-53058024-53058752	chr20	53058024	53058752	GCGGGGAAAAGAGAGGG	-0.124868	0.865383	MACS_peak_1956	chr20	53057263	53060463	728	22.75	MACS_peak_1956	chr20	53057217	53060508	138.64	chr20-53058024-53058752	22.1209
chr17-59827429-59828055	chr17	59827429	59828055	TTGGCGTCTACGACAGT;GTGGCAACATAAGCTAT	0.204228	0.275312	MACS_peak_1341	chr17	59826452	59829202	626	22.7636	MACS_peak_1341	chr17	59826412	59829241	63.66	chr17-59827429-59828055	22.128
chr20-52937625-52938296	chr20	52937625	52938296	TTTTGAGTCGAGAAGGA	0.220466	0.48158	MACS_peak_1954	chr20	52937123	52937773	148	22.7692	MACS_peak_1954	chr20	52937097	52937798	63.93	chr20-52937625-52938296	24.679
chr17-59703507-59703997	chr17	59703507	59703997	GCCTGAATGGACAGAGT	0.475007	0.242713	MACS_peak_1335	chr17	59703280	59705430	490	22.7907	MACS_peak_1335	chr17	59703249	59705461	147.58	chr17-59703507-59703997	22.1519
chr6-119558560-119558674	chr6	119558560	119558674	CGGAACAGGATATAAAG;GGCTGTACGAGTACGCC	0.0799549	0.714799	MACS_peak_3030	chr6	119558325	119558825	114	22.8	MACS_peak_3030	chr6	119558402	119558748	121.45	chr6-119558560-119558674	32.948
chr18-77889279-77890010	chr18	77889279	77890010	GAGCGGGACGCCGTATG	0.528217	0.17842	MACS_peak_1452	chr18	77889896	77890396	114	22.8	no_overlap	.	.	.	.	.	.
chr17-59699297-59699868	chr17	59699297	59699868	GTGGGTGGCGACAGAGG	-0.00149271	0.998058	MACS_peak_1334	chr17	59698351	59700851	571	22.84	MACS_peak_1334	chr17	59698322	59700879	82.32	chr17-59699297-59699868	22.3309
chr17-59362628-59363216	chr17	59362628	59363216	CTGAGATGCGGGCGGGC;ATATAAGTCAAGTCGCG	0.229945	0.477128	MACS_peak_1330	chr17	59361548	59362948	320	22.8571	MACS_peak_1330	chr17	59361518	59362977	204.92	chr17-59362628-59363216	23.9205
chr17-59698325-59698923	chr17	59698325	59698923	TACGGTCCAGCTGTTGG	0.246535	0.550371	MACS_peak_1334	chr17	59698351	59700851	572	22.88	MACS_peak_1334	chr17	59698322	59700879	82.32	chr17-59698325-59698923	23.3868
chr17-59700136-59700708	chr17	59700136	59700708	CTGGAGCTTAGGGCAAG;GCTGATGTGTCGTCAAT	0.297301	0.809088	MACS_peak_1334	chr17	59698351	59700851	572	22.88	MACS_peak_1334	chr17	59698322	59700879	82.32	chr17-59700136-59700708	22.37
chr7-33238287-33239328	chr7	33238287	33239328	TCATCGTGGGACTTCCA	0.129228	0.734519	MACS_peak_3120	chr7	33237902	33238402	115	23	MACS_peak_3120	chr7	33237976	33238327	72.7	chr7-33238287-33239328	11.396
chr17-59698516-59699092	chr17	59698516	59699092	GGGTGGGGCTCCGTCTT;GGGGCCAGGTGGATGGG	-0.238809	0.581068	MACS_peak_1334	chr17	59698351	59700851	576	23.04	MACS_peak_1334	chr17	59698322	59700879	82.32	chr17-59698516-59699092	22.5264
chr20-53058149-53058887	chr20	53058149	53058887	GCAGATGAAAAATACCG	0.175782	0.65439	MACS_peak_1956	chr20	53057263	53060463	738	23.0625	MACS_peak_1956	chr20	53057217	53060508	138.64	chr20-53058149-53058887	22.4248
chr17-59703797-59704294	chr17	59703797	59704294	CACCCCTGCAAACGCGT	0.547063	0.126826	MACS_peak_1335	chr17	59703280	59705430	497	23.1163	MACS_peak_1335	chr17	59703249	59705461	147.58	chr17-59703797-59704294	22.4684
chr17-59704369-59704866	chr17	59704369	59704866	GTAAAAATTTTCAGTGG;CCGGAGGGGGGGACGGG	-0.181452	0.26224	MACS_peak_1335	chr17	59703280	59705430	497	23.1163	MACS_peak_1335	chr17	59703249	59705461	147.58	chr17-59704369-59704866	22.4684
chr17-59698430-59699009	chr17	59698430	59699009	GGGCTGGGTAGGCCGTA	-0.355139	0.522314	MACS_peak_1334	chr17	59698351	59700851	579	23.16	MACS_peak_1334	chr17	59698322	59700879	82.32	chr17-59698430-59699009	22.6437
chr17-59703425-59703923	chr17	59703425	59703923	GGCGGCGGGAGCGGCAA	0.256979	0.280801	MACS_peak_1335	chr17	59703280	59705430	498	23.1628	MACS_peak_1335	chr17	59703249	59705461	147.58	chr17-59703425-59703923	22.5136
chr8-89793677-89794273	chr8	89793677	89794273	TAAGTGCTAGGTCCCGC	-0.913043	0.000991282	MACS_peak_3323	chr8	89793293	89793793	116	23.2	no_overlap	.	.	.	.	.	.
chr17-59699073-59699655	chr17	59699073	59699655	CATTGTCCTCGGAGAGA	0.167447	0.787027	MACS_peak_1334	chr17	59698351	59700851	582	23.28	MACS_peak_1334	chr17	59698322	59700879	82.32	chr17-59699073-59699655	22.761
chr17-59699271-59699853	chr17	59699271	59699853	TGGGTAGTACATTTGTA	-0.169579	0.72939	MACS_peak_1334	chr17	59698351	59700851	582	23.28	MACS_peak_1334	chr17	59698322	59700879	82.32	chr17-59699271-59699853	22.761
chr17-59698329-59698935	chr17	59698329	59698935	ATCTTTGGTATGGAGTT;ATCGTCTGAAGAGGAGG	0.550669	0.068386	MACS_peak_1334	chr17	59698351	59700851	584	23.36	MACS_peak_1334	chr17	59698322	59700879	82.32	chr17-59698329-59698935	23.6996
chr17-59700267-59701062	chr17	59700267	59701062	TAAAGATGTAGACAAAA	-0.154805	0.731758	MACS_peak_1334	chr17	59698351	59700851	584	23.36	MACS_peak_1334	chr17	59698322	59700879	82.32	chr17-59700267-59701062	23.9343
chr1-181104597-181105391	chr1	181104597	181105391	GAATACGAAGGGTAGTT	0.103575	0.818532	MACS_peak_185	chr1	181103754	181104854	257	23.3636	MACS_peak_185	chr1	181103720	181104888	3100	chr1-181104597-181105391	24.9144
chr20-52936721-52937275	chr20	52936721	52937275	GTCCGGTTAGATGGGTG	0.465373	0.0262962	MACS_peak_1954	chr20	52937123	52937773	152	23.3846	MACS_peak_1954	chr20	52937097	52937798	63.93	chr20-52936721-52937275	25.3923
chr17-55601702-55602274	chr17	55601702	55602274	AATAGGATCAAGGTGTC;AAGCGTTTGAGCGCCAC	-0.0305233	0.906805	MACS_peak_1310	chr17	55601204	55601854	152	23.3846	MACS_peak_1310	chr17	55601163	55601894	613.8	chr17-55601702-55602274	26.2654
chr17-59703394-59703898	chr17	59703394	59703898	GGAGATGGTGGCAGGGG	-1.13788	0.0114474	MACS_peak_1335	chr17	59703280	59705430	504	23.4419	MACS_peak_1335	chr17	59703249	59705461	147.58	chr17-59703394-59703898	22.7848
chr17-59703431-59703935	chr17	59703431	59703935	GAGGTGGGGGATGCAGG	-0.0210241	0.977471	MACS_peak_1335	chr17	59703280	59705430	504	23.4419	MACS_peak_1335	chr17	59703249	59705461	147.58	chr17-59703431-59703935	22.7848
chr17-59700264-59700867	chr17	59700264	59700867	CACAGTATTGTAAAAGT	-0.0653952	0.87469	MACS_peak_1334	chr17	59698351	59700851	587	23.48	MACS_peak_1334	chr17	59698322	59700879	82.32	chr17-59700264-59700867	23.5823
chr8-95669922-95670907	chr8	95669922	95670907	AATCGTTTTGTAGCTAT	-0.836854	0.0228887	MACS_peak_3332	chr8	95669463	95670063	141	23.5	MACS_peak_3332	chr8	95669413	95670112	185.34	chr8-95669922-95670907	27.1817
chr3-64821003-64821541	chr3	64821003	64821541	GTTTATTGGGGTGACGC	-0.189988	0.54627	MACS_peak_2123	chr3	64821118	64822918	423	23.5	MACS_peak_2123	chr3	64821081	64822955	121.49	chr3-64821003-64821541	24.5464
chr17-59756630-59757090	chr17	59756630	59757090	TATACGGGGCGCCAGGG	-0.0583871	0.943422	MACS_peak_1338	chr17	59755395	59757345	460	23.5897	MACS_peak_1338	chr17	59755362	59757378	75.13	chr17-59756630-59757090	22.8175
chr21-34739930-34740260	chr21	34739930	34740260	TGGGCATGCCTCACTAA	-1.05716	0.0226898	MACS_peak_1984	chr21	34739548	34740048	118	23.6	MACS_peak_1984	chr21	34739617	34739979	167.92	chr21-34739930-34740260	13.5359
chr17-59699032-59699622	chr17	59699032	59699622	ATCGTGAGGGCGATTAC	-0.406133	0.0602998	MACS_peak_1334	chr17	59698351	59700851	590	23.6	MACS_peak_1334	chr17	59698322	59700879	82.32	chr17-59699032-59699622	23.0739
chr16-69747128-69747620	chr16	69747128	69747620	AGTCGCTGATAGGACGT	0.359733	0.202628	MACS_peak_1170	chr16	69746746	69747246	118	23.6	no_overlap	.	.	.	.	.	.
chr17-59704881-59705389	chr17	59704881	59705389	GCGCCCCGGTGGGAAGT	-0.648719	0.186583	MACS_peak_1335	chr17	59703280	59705430	508	23.6279	MACS_peak_1335	chr17	59703249	59705461	147.58	chr17-59704881-59705389	22.9656
chr17-59828123-59828774	chr17	59828123	59828774	TTGTATCTGGGTGACTC	-0.553427	0.162181	MACS_peak_1341	chr17	59826452	59829202	651	23.6727	MACS_peak_1341	chr17	59826412	59829241	63.66	chr17-59828123-59828774	23.0117
chr17-59698537-59699129	chr17	59698537	59699129	TGGCACGGTGGTGTGAG	0.0673042	0.843988	MACS_peak_1334	chr17	59698351	59700851	592	23.68	MACS_peak_1334	chr17	59698322	59700879	82.32	chr17-59698537-59699129	23.1521
chr9-68417031-68417587	chr9	68417031	68417587	ACGGAATCTTAGGGCTG	-0.0825721	0.888394	MACS_peak_3463	chr9	68417362	68418312	225	23.6842	MACS_peak_3463	chr9	68417325	68418349	77.53	chr9-68417031-68417587	25.5859
chr20-53059486-53060245	chr20	53059486	53060245	AAAAGACTGTGGGCGAA	-0.316863	0.36091	MACS_peak_1956	chr20	53057263	53060463	759	23.7188	MACS_peak_1956	chr20	53057217	53060508	138.64	chr20-53059486-53060245	23.0629
chr17-59698366-59698959	chr17	59698366	59698959	TAAGTGGGGGTATTATT	-1.09533	6.10741e-06	MACS_peak_1334	chr17	59698351	59700851	593	23.72	MACS_peak_1334	chr17	59698322	59700879	82.32	chr17-59698366-59698959	23.1912
chr3-64822491-64823505	chr3	64822491	64823505	TACGACGTCCGCTGCCT	0.294231	0.432515	MACS_peak_2123	chr3	64821118	64822918	427	23.7222	MACS_peak_2123	chr3	64821081	64822955	121.49	chr3-64822491-64823505	24.7599
chr20-53057988-53058748	chr20	53057988	53058748	CTTGTACGGGGGGAAAG;CAAGTGCGCAAATAGGG	0.36582	0.256668	MACS_peak_1956	chr20	53057263	53060463	760	23.75	MACS_peak_1956	chr20	53057217	53060508	138.64	chr20-53057988-53058748	23.0933
chr17-59828346-59829000	chr17	59828346	59829000	AGGAAGGCAGAAGCAGT	0.664365	0.0319702	MACS_peak_1341	chr17	59826452	59829202	654	23.7818	MACS_peak_1341	chr17	59826412	59829241	63.66	chr17-59828346-59829000	23.1177
chr5-58596894-58597698	chr5	58596894	58597698	AGGCAGGGGGGGGGGGC	0.351975	0.641486	MACS_peak_2597	chr5	58597579	58598079	119	23.8	MACS_peak_2597	chr5	58597644	58598014	72.7	chr5-58596894-58597698	14.5946
chr17-59699226-59699821	chr17	59699226	59699821	GAACGCGTGCATGGAGA	1.06476	0.0129998	MACS_peak_1334	chr17	59698351	59700851	595	23.8	MACS_peak_1334	chr17	59698322	59700879	82.32	chr17-59699226-59699821	23.2695
chr17-59698079-59698946	chr17	59698079	59698946	AGATGAGAGACCCGGGG	-0.246668	0.726436	MACS_peak_1334	chr17	59698351	59700851	595	23.8	MACS_peak_1334	chr17	59698322	59700879	82.32	chr17-59698079-59698946	24.4036
chr15-67360092-67360626	chr15	67360092	67360626	CGGCCAGAATGGCTGCA	0.185274	0.594064	MACS_peak_234216	chr15	67359711	67360211	119	23.8	no_overlap	.	.	.	.	.	.
chr17-54124072-54124459	chr17	54124072	54124459	GGCATTTCGCGGTATGG	-0.25413	0.422864	MACS_peak_1306	chr17	54124340	54124840	119	23.8	no_overlap	.	.	.	.	.	.
chr3-63996548-63997131	chr3	63996548	63997131	AGGCGATGGTTGTCAAT	0.0880731	0.857272	MACS_peak_2121	chr3	63995558	63996858	310	23.8462	MACS_peak_2121	chr3	63995518	63996897	66.06	chr3-63996548-63997131	25.3082
chr17-59703449-59703962	chr17	59703449	59703962	TAAAGCACGAGGTAGAT	-0.268903	0.286125	MACS_peak_1335	chr17	59703280	59705430	513	23.8605	MACS_peak_1335	chr17	59703249	59705461	147.58	chr17-59703449-59703962	23.1917
chr20-53058792-53059557	chr20	53058792	53059557	GGGCGGGTGTATGGGTC	0.47245	0.440756	MACS_peak_1956	chr20	53057263	53060463	765	23.9062	MACS_peak_1956	chr20	53057217	53060508	138.64	chr20-53058792-53059557	23.2452
chr17-59704915-59705442	chr17	59704915	59705442	TTGGCGGTCTCAGCAGG	0.21393	0.813567	MACS_peak_1335	chr17	59703280	59705430	515	23.9535	MACS_peak_1335	chr17	59703249	59705461	147.58	chr17-59704915-59705442	23.8246
chr9-68417096-68417590	chr9	68417096	68417590	AAGGGATGAACCCGATA;TTTAGTTACCACGATGG	0.155232	0.969665	MACS_peak_3463	chr9	68417362	68418312	228	24	MACS_peak_3463	chr9	68417325	68418349	77.53	chr9-68417096-68417590	25.8789
chr20-53396507-53396987	chr20	53396507	53396987	TTGGTTGCAGGAGCGAT	0.149641	0.816836	MACS_peak_1960	chr20	53396079	53398079	480	24	MACS_peak_1960	chr20	53396048	53398110	79.03	chr20-53396507-53396987	23.2784
chr17-59704865-59705381	chr17	59704865	59705381	TGCCTAGCGGGGCAGGG	0.830777	0.0395476	MACS_peak_1335	chr17	59703280	59705430	516	24	MACS_peak_1335	chr17	59703249	59705461	147.58	chr17-59704865-59705381	23.3273
chr17-59362408-59362744	chr17	59362408	59362744	GATTTCGTTGGTACATG	-0.0191396	0.982333	MACS_peak_1330	chr17	59361548	59362948	336	24	MACS_peak_1330	chr17	59361518	59362977	204.92	chr17-59362408-59362744	23.0295
chr1-37614486-37615054	chr1	37614486	37615054	AGAGGCTGAAATTAGCA;TTCTGGGTAGCGACTTG	-0.164212	0.860118	MACS_peak_34	chr1	37614934	37615434	120	24	no_overlap	.	.	.	.	.	.
chr17-54498647-54499343	chr17	54498647	54499343	GTGGGAAATATCTATAG	-0.229854	0.564093	MACS_peak_1307	chr17	54498267	54498767	120	24	no_overlap	.	.	.	.	.	.
chr17-59828181-59828842	chr17	59828181	59828842	TCAAGTGTGACGAGATC	0.399445	0.461721	MACS_peak_1341	chr17	59826452	59829202	661	24.0364	MACS_peak_1341	chr17	59826412	59829241	63.66	chr17-59828181-59828842	23.3651
chr17-59699459-59700060	chr17	59699459	59700060	ACACGTGGACGTAGGAC	2.38132	9.78556e-08	MACS_peak_1334	chr17	59698351	59700851	601	24.04	MACS_peak_1334	chr17	59698322	59700879	82.32	chr17-59699459-59700060	23.5041
chr17-59700129-59700730	chr17	59700129	59700730	ACCATACGAGCTCAGTG	-0.384898	0.500169	MACS_peak_1334	chr17	59698351	59700851	601	24.04	MACS_peak_1334	chr17	59698322	59700879	82.32	chr17-59700129-59700730	23.5041
chr17-59703603-59704121	chr17	59703603	59704121	AAGCAAAGTCCATGTGG;GTCGTCAGAATTTATAT	0.195643	0.855527	MACS_peak_1335	chr17	59703280	59705430	518	24.093	MACS_peak_1335	chr17	59703249	59705461	147.58	chr17-59703603-59704121	23.4177
chr17-59698818-59699421	chr17	59698818	59699421	TCGTCATAATCAATACG	0.348362	0.201358	MACS_peak_1334	chr17	59698351	59700851	603	24.12	MACS_peak_1334	chr17	59698322	59700879	82.32	chr17-59698818-59699421	23.5823
chr20-53366074-53366635	chr20	53366074	53366635	ATGGGCCCGTAAGTTCG	-0.796827	0.00772496	MACS_peak_1959	chr20	53365088	53366388	314	24.1538	MACS_peak_1959	chr20	53365044	53366431	65.2	chr20-53366074-53366635	25.739
chr15-52956159-52956740	chr15	52956159	52956740	GATTCGCCATATGAAGC;GTCCACAGTGATGAAGC	0.345336	0.39943	MACS_peak_1031	chr15	52955666	52956316	157	24.1538	MACS_peak_1031	chr15	52955639	52956342	193.94	chr15-52956159-52956740	26.0313
chr20-46620945-46621564	chr20	46620945	46621564	GCCTAACATTAGCCTAT	0.0218495	0.972835	MACS_peak_1946	chr20	46621298	46622398	266	24.1818	MACS_peak_1946	chr20	46621272	46622423	730.37	chr20-46620945-46621564	25.3692
chr17-59700068-59700674	chr17	59700068	59700674	TGGGTTAGTTCACGACG	0.375726	0.274612	MACS_peak_1334	chr17	59698351	59700851	606	24.24	MACS_peak_1334	chr17	59698322	59700879	82.32	chr17-59700068-59700674	23.6996
chr20-53396565-53397050	chr20	53396565	53397050	GGTCTAATACTGTTCAA	-0.0098828	0.983719	MACS_peak_1960	chr20	53396079	53398079	485	24.25	MACS_peak_1960	chr20	53396048	53398110	79.03	chr20-53396565-53397050	23.5209
chr17-59704530-59705052	chr17	59704530	59705052	CGGGGGGGGCGGTGGTG	-0.812114	0.0186119	MACS_peak_1335	chr17	59703280	59705430	522	24.2791	MACS_peak_1335	chr17	59703249	59705461	147.58	chr17-59704530-59705052	23.5986
chr17-59700100-59700707	chr17	59700100	59700707	ACACTCTAGCAGTCCTC	-0.27591	0.604273	MACS_peak_1334	chr17	59698351	59700851	607	24.28	MACS_peak_1334	chr17	59698322	59700879	82.32	chr17-59700100-59700707	23.7388
chr20-53395862-53396565	chr20	53395862	53396565	ATCGCAATGTGTGGGGC;ATTCTGGGGCGTTACGG;TATCGGGCATTGTGTTT	-0.0325556	0.726289	MACS_peak_1960	chr20	53396079	53398079	486	24.3	MACS_peak_1960	chr20	53396048	53398110	79.03	chr20-53395862-53396565	25.0727
chr17-59698050-59698959	chr17	59698050	59698959	TGTCGTTTGGGTGTGCG	0.159746	0.682969	MACS_peak_1334	chr17	59698351	59700851	608	24.32	MACS_peak_1334	chr17	59698322	59700879	82.32	chr17-59698050-59698959	24.912
chr20-53396348-53396836	chr20	53396348	53396836	TTAGTTGGGCGGCGATG	0.0722687	0.924096	MACS_peak_1960	chr20	53396079	53398079	488	24.4	MACS_peak_1960	chr20	53396048	53398110	79.03	chr20-53396348-53396836	23.6663
chr2-70824314-70825141	chr2	70824314	70825141	TTTTGGACCTGACGTTA	-0.452641	0.0315652	MACS_peak_1660	chr2	70823747	70824497	183	24.4	MACS_peak_1660	chr2	70823716	70824528	380.17	chr2-70824314-70825141	26.3547
chr10-9165853-9166690	chr10	9165853	9166690	GCCCTTGGAGGCACCCG	-0.23354	0.668301	MACS_peak_310	chr10	9166568	9167068	122	24.4	MACS_peak_310	chr10	9166654	9166981	64.74	chr10-9165853-9166690	11.0092
chr17-59703797-59704322	chr17	59703797	59704322	GATGAGGACCGGGAAAG	0.145316	0.791951	MACS_peak_1335	chr17	59703280	59705430	525	24.4186	MACS_peak_1335	chr17	59703249	59705461	147.58	chr17-59703797-59704322	23.7342
chr17-59828530-59829205	chr17	59828530	59829205	CTTTTGGTAAATGGGCA	0.0701497	0.859501	MACS_peak_1341	chr17	59826452	59829202	672	24.4364	MACS_peak_1341	chr17	59826412	59829241	63.66	chr17-59828530-59829205	23.86
chr17-59699914-59700526	chr17	59699914	59700526	GGAGGGCGATGACTGCG	0.566048	0.106378	MACS_peak_1334	chr17	59698351	59700851	612	24.48	MACS_peak_1334	chr17	59698322	59700879	82.32	chr17-59699914-59700526	23.9343
chr17-59698439-59699051	chr17	59698439	59699051	GTGCTCCATGGAGTGCG;GCAGGAGCCTGCGGGGC	-0.224605	0.627874	MACS_peak_1334	chr17	59698351	59700851	612	24.48	MACS_peak_1334	chr17	59698322	59700879	82.32	chr17-59698439-59699051	23.9343
chr17-59703233-59703807	chr17	59703233	59703807	TAGGTACTAGGGTAGAA	-1.18116	0.0284154	MACS_peak_1335	chr17	59703280	59705430	527	24.5116	MACS_peak_1335	chr17	59703249	59705461	147.58	chr17-59703233-59703807	25.226
chr17-59756322-59756800	chr17	59756322	59756800	GACGGCGGAGGGAAGGT;TCTAGGAGGTAGTTTTT	-0.0390942	0.84253	MACS_peak_1338	chr17	59755395	59757345	478	24.5128	MACS_peak_1338	chr17	59755362	59757378	75.13	chr17-59756322-59756800	23.7103
chr17-59699215-59699828	chr17	59699215	59699828	GCATACGGGGAGAATGG	-0.24374	0.398282	MACS_peak_1334	chr17	59698351	59700851	613	24.52	MACS_peak_1334	chr17	59698322	59700879	82.32	chr17-59699215-59699828	23.9734
chr17-59827772-59828447	chr17	59827772	59828447	TGGACCGGCAGGCGGGA	-0.198713	0.65451	MACS_peak_1341	chr17	59826452	59829202	675	24.5455	MACS_peak_1341	chr17	59826412	59829241	63.66	chr17-59827772-59828447	23.86
chr17-59699185-59699799	chr17	59699185	59699799	GTTCCGAGTCTGGGGCC	0.452636	0.200455	MACS_peak_1334	chr17	59698351	59700851	614	24.56	MACS_peak_1334	chr17	59698322	59700879	82.32	chr17-59699185-59699799	24.0125
chr17-59700058-59700672	chr17	59700058	59700672	ACGAATCGTACCTCGAG;CTCGAGCGGGGGTGGCG	0.15742	0.267678	MACS_peak_1334	chr17	59698351	59700851	614	24.56	MACS_peak_1334	chr17	59698322	59700879	82.32	chr17-59700058-59700672	24.0125
chr17-59698802-59699416	chr17	59698802	59699416	GCCAGGCGAGCGTTGGG;ACCTCTTTGTTGGTATG	-0.121693	9.08176e-06	MACS_peak_1334	chr17	59698351	59700851	614	24.56	MACS_peak_1334	chr17	59698322	59700879	82.32	chr17-59698802-59699416	24.0125
chr20-53396908-53397400	chr20	53396908	53397400	CCCGTGCTTATAAACCG	0.0396092	0.952746	MACS_peak_1960	chr20	53396079	53398079	492	24.6	MACS_peak_1960	chr20	53396048	53398110	79.03	chr20-53396908-53397400	23.8603
chrX-47677925-47678547	chrX	47677925	47678547	CTGATGCTCGGTTGGTG	0.569398	0.36335	MACS_peak_3598	chrX	47678424	47678924	123	24.6	no_overlap	.	.	.	.	.	.
chr20-35869940-35870549	chr20	35869940	35870549	TCGGGGGGTGTGTGAGG	-0.693986	0.0010258	MACS_peak_1933	chr20	35869563	35870063	123	24.6	no_overlap	.	.	.	.	.	.
chr17-59755848-59756329	chr17	59755848	59756329	GTGGGAATTTGTGGGGT	-0.124864	0.811918	MACS_peak_1338	chr17	59755395	59757345	481	24.6667	MACS_peak_1338	chr17	59755362	59757378	75.13	chr17-59755848-59756329	23.8591
chr17-59698200-59698968	chr17	59698200	59698968	ATGACAACCAGTCGAAT	0.132242	0.79849	MACS_peak_1334	chr17	59698351	59700851	617	24.68	MACS_peak_1334	chr17	59698322	59700879	82.32	chr17-59698200-59698968	25.264
chr17-59704295-59704826	chr17	59704295	59704826	CCGGTAGGCAGGCACGG	0.288454	0.5316	MACS_peak_1335	chr17	59703280	59705430	531	24.6977	MACS_peak_1335	chr17	59703249	59705461	147.58	chr17-59704295-59704826	24.0054
chr17-59700106-59700724	chr17	59700106	59700724	GTAGTGGCACAGGCGGT	-0.0949261	0.90575	MACS_peak_1334	chr17	59698351	59700851	618	24.72	MACS_peak_1334	chr17	59698322	59700879	82.32	chr17-59700106-59700724	24.1689
chr9-125313461-125313711	chr9	125313461	125313711	GTGAGGCGGTTTAGACT;GGTCCCGAAAGTTTGGT	0.248413	0.405328	MACS_peak_3551	chr9	125313587	125314087	124	24.8	MACS_peak_3551	chr9	125313647	125314027	60.2	chr9-125313461-125313711	16.8421
chr15-54218748-54219292	chr15	54218748	54219292	TGCTCATAGGTATTGGT	-0.551006	0.191975	MACS_peak_1039	chr15	54218372	54218872	124	24.8	MACS_peak_1039	chr15	54218450	54218793	59.81	chr15-54218748-54219292	13.1195
chr9-115534815-115535427	chr9	115534815	115535427	CGGAGATCCCGAGAACG	0.0487537	0.95001	MACS_peak_3531	chr9	115535303	115535803	124	24.8	no_overlap	.	.	.	.	.	.
chr1-181103491-181104027	chr1	181103491	181104027	TGTGAGTTCGTGTTTGG;GGACGGAATGCGCCCTG	-1.15509	0.00949918	MACS_peak_185	chr1	181103754	181104854	273	24.8182	MACS_peak_185	chr1	181103720	181104888	3100	chr1-181103491-181104027	26.2842
chr17-59698953-59699574	chr17	59698953	59699574	GGGCAGGGGCCATGATG	-0.195535	0.563204	MACS_peak_1334	chr17	59698351	59700851	621	24.84	MACS_peak_1334	chr17	59698322	59700879	82.32	chr17-59698953-59699574	24.2863
chr3-63996535-63997037	chr3	63996535	63997037	GGTGAATTAGGGTCGGC	-0.439793	0.16207	MACS_peak_2121	chr3	63995558	63996858	323	24.8462	MACS_peak_2121	chr3	63995518	63996897	66.06	chr3-63996535-63997037	26.2509
chr3-63996534-63997141	chr3	63996534	63997141	GGTTGAGCCGGCTGGTC;GGGCCCTAGGTGGGGAG	-0.000930899	0.0458093	MACS_peak_2121	chr3	63995558	63996858	324	24.9231	MACS_peak_2121	chr3	63995518	63996897	66.06	chr3-63996534-63997141	26.3234
chr17-59704597-59705134	chr17	59704597	59705134	ACCGAGCAGGGTATGGC	0.0586637	0.938198	MACS_peak_1335	chr17	59703280	59705430	537	24.9767	MACS_peak_1335	chr17	59703249	59705461	147.58	chr17-59704597-59705134	24.2767
chr17-59703230-59703817	chr17	59703230	59703817	GCAGAGCATGGGAGTGG	-1.22481	0.015524	MACS_peak_1335	chr17	59703280	59705430	537	24.9767	MACS_peak_1335	chr17	59703249	59705461	147.58	chr17-59703230-59703817	25.6781
chr17-59698628-59699253	chr17	59698628	59699253	AGGGAGGGGATACCGGG	0.0985027	0.846198	MACS_peak_1334	chr17	59698351	59700851	625	25	MACS_peak_1334	chr17	59698322	59700879	82.32	chr17-59698628-59699253	24.4427
chr17-59703602-59704140	chr17	59703602	59704140	ACCAGTGGGATCCTATA;ACGAGGCCAGCGGCCAG	-0.164371	0.86132	MACS_peak_1335	chr17	59703280	59705430	538	25.0233	MACS_peak_1335	chr17	59703249	59705461	147.58	chr17-59703602-59704140	24.3219
chr17-59698469-59699096	chr17	59698469	59699096	TGGTGCCCGCAGGTGGG	-0.0514042	0.931935	MACS_peak_1334	chr17	59698351	59700851	627	25.08	MACS_peak_1334	chr17	59698322	59700879	82.32	chr17-59698469-59699096	24.5209
chr20-53058191-53058994	chr20	53058191	53058994	GGTCGGTGGGAGGGTGC;GTGCCACGAGCGCGGAG	0.209709	0.850777	MACS_peak_1956	chr20	53057263	53060463	803	25.0937	MACS_peak_1956	chr20	53057217	53060508	138.64	chr20-53058191-53058994	24.3999
chr17-59703603-59704143	chr17	59703603	59704143	AGTATGCTAGGTATGCG	-0.154735	0.772419	MACS_peak_1335	chr17	59703280	59705430	540	25.1163	MACS_peak_1335	chr17	59703249	59705461	147.58	chr17-59703603-59704143	24.4123
chr17-59827581-59828272	chr17	59827581	59828272	GTTGTGCACGCGGCTGT	0.0101109	0.981535	MACS_peak_1341	chr17	59826452	59829202	691	25.1273	MACS_peak_1341	chr17	59826412	59829241	63.66	chr17-59827581-59828272	24.4256
chr17-59362596-59363300	chr17	59362596	59363300	GGCGTCCGGCCGGGGTA	0.414059	0.379475	MACS_peak_1330	chr17	59361548	59362948	352	25.1429	MACS_peak_1330	chr17	59361518	59362977	204.92	chr17-59362596-59363300	26.1138
chr17-59698685-59699314	chr17	59698685	59699314	GGTAGTGGTAAACTCAC	0.478893	0.571699	MACS_peak_1334	chr17	59698351	59700851	629	25.16	MACS_peak_1334	chr17	59698322	59700879	82.32	chr17-59698685-59699314	24.5991
chr17-59699014-59699643	chr17	59699014	59699643	AGAAGGCAGTTTACGGT;GGTGAAGACCGCCCGTT	-0.121858	0.796954	MACS_peak_1334	chr17	59698351	59700851	629	25.16	MACS_peak_1334	chr17	59698322	59700879	82.32	chr17-59699014-59699643	24.5991
chr17-59704593-59705134	chr17	59704593	59705134	AGAGGGCGGGAGGGGCC	-0.359732	0.161249	MACS_peak_1335	chr17	59703280	59705430	541	25.1628	MACS_peak_1335	chr17	59703249	59705461	147.58	chr17-59704593-59705134	24.4575
chr17-59756589-59757080	chr17	59756589	59757080	GACAACCGAGGGGGGCT	0.326569	0.303718	MACS_peak_1338	chr17	59755395	59757345	491	25.1795	MACS_peak_1338	chr17	59755362	59757378	75.13	chr17-59756589-59757080	24.3552
chr2-102319920-102320604	chr2	102319920	102320604	ATCAGTCTATGTGAGTG	-1.50096	0.000587835	MACS_peak_1688	chr2	102320478	102320978	126	25.2	MACS_peak_1688	chr2	102320444	102321011	700.87	chr2-102319920-102320604	28.2187
chr17-59703445-59703987	chr17	59703445	59703987	GATTCGTTTGTTTTATG;TGATGGGTCGGGGGTAG	-0.465614	0.0453874	MACS_peak_1335	chr17	59703280	59705430	542	25.2093	MACS_peak_1335	chr17	59703249	59705461	147.58	chr17-59703445-59703987	24.5027
chr17-59699190-59699821	chr17	59699190	59699821	CTGACTTGGTGTACTGG	0.0655	0.912712	MACS_peak_1334	chr17	59698351	59700851	631	25.24	MACS_peak_1334	chr17	59698322	59700879	82.32	chr17-59699190-59699821	24.6774
chr17-59699111-59699742	chr17	59699111	59699742	ACAGAGATGCTGAGCGG;TCCCGTTAATGTGTTTA	-0.337998	0.216048	MACS_peak_1334	chr17	59698351	59700851	631	25.24	MACS_peak_1334	chr17	59698322	59700879	82.32	chr17-59699111-59699742	24.6774
chr17-59699332-59699964	chr17	59699332	59699964	TTATGGCTGTACGGGTA	2.8888	2.07563e-18	MACS_peak_1334	chr17	59698351	59700851	632	25.28	MACS_peak_1334	chr17	59698322	59700879	82.32	chr17-59699332-59699964	24.7165
chr3-64822462-64823177	chr3	64822462	64823177	ACATTCGTCTGGTTGCT	0.433445	0.392883	MACS_peak_2123	chr3	64821118	64822918	456	25.3333	MACS_peak_2123	chr3	64821081	64822955	121.49	chr3-64822462-64823177	26.3074
chr17-59703441-59703986	chr17	59703441	59703986	TCCAGAGAACCTCAGCC	0.997601	0.012697	MACS_peak_1335	chr17	59703280	59705430	545	25.3488	MACS_peak_1335	chr17	59703249	59705461	147.58	chr17-59703441-59703986	24.6383
chr17-59698439-59699073	chr17	59698439	59699073	TGACGTGTTCTTGGGGG	0.194436	0.472816	MACS_peak_1334	chr17	59698351	59700851	634	25.36	MACS_peak_1334	chr17	59698322	59700879	82.32	chr17-59698439-59699073	24.7947
chr17-59698825-59699459	chr17	59698825	59699459	ACCTCCCATTCTGCAAC	0.067479	0.907268	MACS_peak_1334	chr17	59698351	59700851	634	25.36	MACS_peak_1334	chr17	59698322	59700879	82.32	chr17-59698825-59699459	24.7947
chr3-63995263-63995888	chr3	63995263	63995888	GGAGGCGACTCCGGTAA	0.290767	0.705229	MACS_peak_2121	chr3	63995558	63996858	330	25.3846	MACS_peak_2121	chr3	63995518	63996897	66.06	chr3-63995263-63995888	26.831
chr17-59703408-59703954	chr17	59703408	59703954	CGATTACAGGGAGCCCG;AGGGTTGGAGGATGAGG	-1.18213	0.00213833	MACS_peak_1335	chr17	59703280	59705430	546	25.3953	MACS_peak_1335	chr17	59703249	59705461	147.58	chr17-59703408-59703954	24.6835
chr5-148704123-148704821	chr5	148704123	148704821	CAAATGCGAAGCACCTG	0.0134694	0.977386	MACS_peak_2774	chr5	148704694	148705194	127	25.4	MACS_peak_2774	chr5	148704768	148705120	117.3	chr5-148704123-148704821	15.0568
chr17-59698479-59699114	chr17	59698479	59699114	TTAAAGTTTCTTAAGAC	-0.381355	0.218822	MACS_peak_1334	chr17	59698351	59700851	635	25.4	MACS_peak_1334	chr17	59698322	59700879	82.32	chr17-59698479-59699114	24.8338
chr17-59699251-59699886	chr17	59699251	59699886	CTACCAATACGCGCGTG	-0.216913	0.66723	MACS_peak_1334	chr17	59698351	59700851	635	25.4	MACS_peak_1334	chr17	59698322	59700879	82.32	chr17-59699251-59699886	24.8338
chr10-132762393-132762884	chr10	132762393	132762884	AATAACGGCCAACGGTA	0.11451	0.831129	MACS_peak_426	chr10	132762020	132762520	127	25.4	no_overlap	.	.	.	.	.	.
chr17-59699178-59699814	chr17	59699178	59699814	ATTGGTTAGGATATAAT	0.106459	0.774713	MACS_peak_1334	chr17	59698351	59700851	636	25.44	MACS_peak_1334	chr17	59698322	59700879	82.32	chr17-59699178-59699814	24.8729
chr17-59827692-59828392	chr17	59827692	59828392	GGGGAGGGGTTGTCCGG;AACCAACGGCGTGAAGG	-0.126628	0.913433	MACS_peak_1341	chr17	59826452	59829202	700	25.4545	MACS_peak_1341	chr17	59826412	59829241	63.66	chr17-59827692-59828392	24.7437
chr20-53058188-53059005	chr20	53058188	53059005	TGCTCCGGGATGGCGTG;GATTGTGGAGGATGGTG	0.319538	0.242897	MACS_peak_1956	chr20	53057263	53060463	817	25.5312	MACS_peak_1956	chr20	53057217	53060508	138.64	chr20-53058188-53059005	24.8253
chr17-55600563-55601370	chr17	55600563	55601370	TTGAGCTAGATATGTAG;GGGAGCGACGGTGGGCG	0.947235	0.00101026	MACS_peak_1310	chr17	55601204	55601854	166	25.5385	MACS_peak_1310	chr17	55601163	55601894	613.8	chr17-55600563-55601370	28.3174
chr17-59698846-59699485	chr17	59698846	59699485	GCGGGTGCGCGCTCTAG	-0.223863	0.795827	MACS_peak_1334	chr17	59698351	59700851	639	25.56	MACS_peak_1334	chr17	59698322	59700879	82.32	chr17-59698846-59699485	24.9902
chr17-59703199-59703830	chr17	59703199	59703830	AGGAGAGTGCAGCGGGT	-1.15361	0.0233974	MACS_peak_1335	chr17	59703280	59705430	550	25.5814	MACS_peak_1335	chr17	59703249	59705461	147.58	chr17-59703199-59703830	26.2658
chr17-59703616-59704166	chr17	59703616	59704166	GATTCGGATGCATTCGA	-1.02623	0.047475	MACS_peak_1335	chr17	59703280	59705430	550	25.5814	MACS_peak_1335	chr17	59703249	59705461	147.58	chr17-59703616-59704166	24.8644
chr17-59828112-59828816	chr17	59828112	59828816	TGTTCTTTGTAGCTGAG;TAGGGGGGCTGGCCCGT	-0.666406	0.0145728	MACS_peak_1341	chr17	59826452	59829202	704	25.6	MACS_peak_1341	chr17	59826412	59829241	63.66	chr17-59828112-59828816	24.8851
chr1-216501045-216501514	chr1	216501045	216501514	GTAGCTTTAGTTATAAG	0.919563	0.103899	MACS_peak_264	chr1	216500673	216501173	128	25.6	MACS_peak_264	chr1	216500732	216501114	64.29	chr1-216501045-216501514	18.0628
chr7-2403394-2403966	chr7	2403394	2403966	GTCTATGTTATGTTGTG	-0.14971	0.799649	MACS_peak_3084	chr7	2403838	2404338	128	25.6	no_overlap	.	.	.	.	.	.
chr3-64821039-64821580	chr3	64821039	64821580	TAGAGGGACGGTGTCGA	0.229073	0.719803	MACS_peak_2123	chr3	64821118	64822918	462	25.6667	MACS_peak_2123	chr3	64821081	64822955	121.49	chr3-64821039-64821580	26.6275
chr17-59827745-59828451	chr17	59827745	59828451	GTATGCCTGTGGGCCAG	-0.720384	0.00591232	MACS_peak_1341	chr17	59826452	59829202	706	25.6727	MACS_peak_1341	chr17	59826412	59829241	63.66	chr17-59827745-59828451	24.9558
chr17-59704128-59704680	chr17	59704128	59704680	GAGCGGGCGGACAGCGG	0.353421	0.440179	MACS_peak_1335	chr17	59703280	59705430	552	25.6744	MACS_peak_1335	chr17	59703249	59705461	147.58	chr17-59704128-59704680	24.9548
chr17-59699547-59700189	chr17	59699547	59700189	TAAGGGTACGCCTTCGT	2.80851	5.60765e-13	MACS_peak_1334	chr17	59698351	59700851	642	25.68	MACS_peak_1334	chr17	59698322	59700879	82.32	chr17-59699547-59700189	25.1075
chr17-59698319-59698993	chr17	59698319	59698993	GGGCTGGGTTCAGGGTC	-0.33416	0.183011	MACS_peak_1334	chr17	59698351	59700851	642	25.68	MACS_peak_1334	chr17	59698322	59700879	82.32	chr17-59698319-59698993	26.2417
chr1-181491236-181492057	chr1	181491236	181492057	GGGAGCCGGTCGGGACC	-0.621685	0.271276	MACS_peak_188	chr1	181490753	181491403	167	25.6923	MACS_peak_188	chr1	181490716	181491440	346.46	chr1-181491236-181492057	28.1768
chr17-59827246-59827953	chr17	59827246	59827953	GAGGCACGCAAGAACGA	-0.436191	0.292155	MACS_peak_1341	chr17	59826452	59829202	707	25.7091	MACS_peak_1341	chr17	59826412	59829241	63.66	chr17-59827246-59827953	24.9912
chr17-59703242-59703833	chr17	59703242	59703833	TGCGATACTCCGTGAAC;ACATGGTAACAGTTTTC	-1.10938	0.00941046	MACS_peak_1335	chr17	59703280	59705430	553	25.7209	MACS_peak_1335	chr17	59703249	59705461	147.58	chr17-59703242-59703833	26.4014
chr3-64771197-64771708	chr3	64771197	64771708	GTTTGTGTGGTGTGGGC	-0.0905503	0.87847	MACS_peak_2122	chr3	64770603	64771403	206	25.75	MACS_peak_2122	chr3	64770575	64771431	100.22	chr3-64771197-64771708	27.3364
chr17-59700088-59700732	chr17	59700088	59700732	GCAAGCACCGTCGAATC;GTTCGGGGTTCCGGACT;TATTGTGGGCAGTGTGG	-0.125655	0.861359	MACS_peak_1334	chr17	59698351	59700851	644	25.76	MACS_peak_1334	chr17	59698322	59700879	82.32	chr17-59700088-59700732	25.1858
chr3-64821034-64821582	chr3	64821034	64821582	GTACGCGGCGGTGTACG	0.220881	0.608007	MACS_peak_2123	chr3	64821118	64822918	464	25.7778	MACS_peak_2123	chr3	64821081	64822955	121.49	chr3-64821034-64821582	26.7343
chr3-64821445-64821909	chr3	64821445	64821909	AGCGGCTTAGGGGAAGC	0.500409	0.249131	MACS_peak_2123	chr3	64821118	64822918	464	25.7778	MACS_peak_2123	chr3	64821081	64822955	121.49	chr3-64821445-64821909	24.7599
chr20-53396758-53397274	chr20	53396758	53397274	GACTCGCATAGGCGTGC	0.565815	0.184174	MACS_peak_1960	chr20	53396079	53398079	516	25.8	MACS_peak_1960	chr20	53396048	53398110	79.03	chr20-53396758-53397274	25.0242
chr20-53396140-53396656	chr20	53396140	53396656	GTGGGAGGGGCGTCAGC	-0.0938709	0.840066	MACS_peak_1960	chr20	53396079	53398079	516	25.8	MACS_peak_1960	chr20	53396048	53398110	79.03	chr20-53396140-53396656	25.0242
chr17-59827423-59828133	chr17	59827423	59828133	TGAAGTTTTCACCGCTG	0.0107132	0.987735	MACS_peak_1341	chr17	59826452	59829202	710	25.8182	MACS_peak_1341	chr17	59826412	59829241	63.66	chr17-59827423-59828133	25.0972
chr20-53397467-53397984	chr20	53397467	53397984	TACTTCGTTAATGTATC	0.382612	0.429845	MACS_peak_1960	chr20	53396079	53398079	517	25.85	MACS_peak_1960	chr20	53396048	53398110	79.03	chr20-53397467-53397984	25.0727
chr17-59699305-59699952	chr17	59699305	59699952	AGTGGTTTAGCGTCTTT;ATTGCTGTATAGCCGTA	1.65092	5.74815e-17	MACS_peak_1334	chr17	59698351	59700851	647	25.88	MACS_peak_1334	chr17	59698322	59700879	82.32	chr17-59699305-59699952	25.3031
chr17-59756256-59756762	chr17	59756256	59756762	GAGGTGAGTACGGATTG	-0.61591	0.281463	MACS_peak_1338	chr17	59755395	59757345	506	25.9487	MACS_peak_1338	chr17	59755362	59757378	75.13	chr17-59756256-59756762	25.0992
chr17-59756680-59757186	chr17	59756680	59757186	GGGGAATGGCCTCTATA	-0.00581665	0.991683	MACS_peak_1338	chr17	59755395	59757345	506	25.9487	MACS_peak_1338	chr17	59755362	59757378	75.13	chr17-59756680-59757186	25.0992
chr6-115391599-115392219	chr6	115391599	115392219	AGAGGTGGCGGCGTGCG	0.453352	0.137091	MACS_peak_3023	chr6	115392089	115392589	130	26	MACS_peak_3023	chr6	115392180	115392498	140.61	chr6-115391599-115392219	12.2642
chr6-115391911-115392219	chr6	115391911	115392219	TTCGGTGCTAGTAGGCG	0.513916	0.329817	MACS_peak_3023	chr6	115392089	115392589	130	26	MACS_peak_3023	chr6	115392180	115392498	140.61	chr6-115391911-115392219	12.2642
chr4-6643422-6643997	chr4	6643422	6643997	TGCGGTGCGATAAATGG;ACCGAGTATATCAATTG	-0.678685	0.000622116	MACS_peak_2270	chr4	6643867	6644367	130	26	MACS_peak_2270	chr4	6643845	6644388	141.62	chr4-6643422-6643997	27.9926
chr20-53396863-53397383	chr20	53396863	53397383	CAAACTGCGATTTTATC	-0.0532623	0.963988	MACS_peak_1960	chr20	53396079	53398079	520	26	MACS_peak_1960	chr20	53396048	53398110	79.03	chr20-53396863-53397383	25.2182
chr20-53396490-53397010	chr20	53396490	53397010	AGTTACTGTGAAAAACG	-0.120808	0.768958	MACS_peak_1960	chr20	53396079	53398079	520	26	MACS_peak_1960	chr20	53396048	53398110	79.03	chr20-53396490-53397010	25.2182
chr17-59698351-59699001	chr17	59698351	59699001	TATGTTTTGGTACACTC	-0.21484	0.773005	MACS_peak_1334	chr17	59698351	59700851	650	26	MACS_peak_1334	chr17	59698322	59700879	82.32	chr17-59698351-59699001	25.4204
chr20-53396621-53397142	chr20	53396621	53397142	CGCCCCGTTCCACGCGC;TTAATTTGTCGGCCCTG	-0.00084477	0.924571	MACS_peak_1960	chr20	53396079	53398079	521	26.05	MACS_peak_1960	chr20	53396048	53398110	79.03	chr20-53396621-53397142	25.2667
chr17-59827964-59828681	chr17	59827964	59828681	GTAAGTGGTAACGACTG	-0.109017	0.814292	MACS_peak_1341	chr17	59826452	59829202	717	26.0727	MACS_peak_1341	chr17	59826412	59829241	63.66	chr17-59827964-59828681	25.3446
chr17-59699026-59699678	chr17	59699026	59699678	AGGGGCGATGAGGCGTG	0.123877	0.838179	MACS_peak_1334	chr17	59698351	59700851	652	26.08	MACS_peak_1334	chr17	59698322	59700879	82.32	chr17-59699026-59699678	25.4986
chr17-59827340-59828058	chr17	59827340	59828058	GGGAGAAAGCCGCGGTG	-0.0305661	0.959117	MACS_peak_1341	chr17	59826452	59829202	718	26.1091	MACS_peak_1341	chr17	59826412	59829241	63.66	chr17-59827340-59828058	25.38
chr20-53396480-53397003	chr20	53396480	53397003	AACCCATAGGGGAAGTG	0.0577579	0.913793	MACS_peak_1960	chr20	53396079	53398079	523	26.15	MACS_peak_1960	chr20	53396048	53398110	79.03	chr20-53396480-53397003	25.3637
chr17-59698305-59699005	chr17	59698305	59699005	TTGCGTTTAAAGACGGA;CTAGGGTCCGATGGGGT	0.0517384	0.29597	MACS_peak_1334	chr17	59698351	59700851	654	26.16	MACS_peak_1334	chr17	59698322	59700879	82.32	chr17-59698305-59699005	26.711
chr17-59698249-59699005	chr17	59698249	59699005	ATACGGGCCATGTGGCG	-0.443298	0.536548	MACS_peak_1334	chr17	59698351	59700851	654	26.16	MACS_peak_1334	chr17	59698322	59700879	82.32	chr17-59698249-59699005	26.711
chr17-59703420-59703983	chr17	59703420	59703983	TGGGTAGGTTCAGCGGT	0.125688	0.822451	MACS_peak_1335	chr17	59703280	59705430	563	26.186	MACS_peak_1335	chr17	59703249	59705461	147.58	chr17-59703420-59703983	25.4521
chr17-59703621-59704184	chr17	59703621	59704184	GAAGCTGTCAGGGTGCG	-0.0661405	0.853256	MACS_peak_1335	chr17	59703280	59705430	563	26.186	MACS_peak_1335	chr17	59703249	59705461	147.58	chr17-59703621-59704184	25.4521
chr1-115260545-115261066	chr1	115260545	115261066	AGCGGTATACTGAGTGA;AGTGGCGGCAATGCCTG	0.642101	0.00389643	MACS_peak_117	chr1	115259955	115260755	210	26.25	MACS_peak_117	chr1	115259914	115260796	76.41	chr1-115260545-115261066	28.458
chr17-59698585-59699242	chr17	59698585	59699242	GTGAGGTGCGGCCGGGC	0.218947	0.760401	MACS_peak_1334	chr17	59698351	59700851	657	26.28	MACS_peak_1334	chr17	59698322	59700879	82.32	chr17-59698585-59699242	25.6942
chr17-59699188-59699845	chr17	59699188	59699845	TGCGGGGTATGCCCGTC	0.0242352	0.966158	MACS_peak_1334	chr17	59698351	59700851	657	26.28	MACS_peak_1334	chr17	59698322	59700879	82.32	chr17-59699188-59699845	25.6942
chr17-59827220-59827944	chr17	59827220	59827944	CGCTTAGACGCGCACCG	-0.2305	0.793552	MACS_peak_1341	chr17	59826452	59829202	724	26.3273	MACS_peak_1341	chr17	59826412	59829241	63.66	chr17-59827220-59827944	25.5921
chr20-53396836-53397363	chr20	53396836	53397363	AGTGCCGGGGGGGGGGG	0.0561364	0.959444	MACS_peak_1960	chr20	53396079	53398079	527	26.35	MACS_peak_1960	chr20	53396048	53398110	79.03	chr20-53396836-53397363	25.5577
chr17-59699993-59700652	chr17	59699993	59700652	GGCCGTGTATCTGGAAA	0.354153	0.524168	MACS_peak_1334	chr17	59698351	59700851	659	26.36	MACS_peak_1334	chr17	59698322	59700879	82.32	chr17-59699993-59700652	25.7724
chr17-59827946-59828671	chr17	59827946	59828671	GTGGTAAGATGCTACTA	-0.320607	0.56106	MACS_peak_1341	chr17	59826452	59829202	725	26.3636	MACS_peak_1341	chr17	59826412	59829241	63.66	chr17-59827946-59828671	25.6274
chr20-53366045-53366678	chr20	53366045	53366678	CTTCGGGTCTTTGGTTA	0.345899	0.636062	MACS_peak_1959	chr20	53365088	53366388	343	26.3846	MACS_peak_1959	chr20	53365044	53366431	65.2	chr20-53366045-53366678	27.8298
chr4-114481660-114482292	chr4	114481660	114482292	CCCTCGAGGTGATATTT	-0.340294	0.516588	MACS_peak_2373	chr4	114482160	114482660	132	26.4	MACS_peak_2373	chr4	114482245	114482575	126.45	chr4-114481660-114482292	14.2424
chr15-53379089-53379740	chr15	53379089	53379740	GGACATTGCGACCAACT	-0.58987	0.0110796	MACS_peak_1034	chr15	53379608	53380108	132	26.4	MACS_peak_1034	chr15	53379693	53380022	61.49	chr15-53379089-53379740	14.2857
chr5-22250362-22250988	chr5	22250362	22250988	TTATGTACGTTAACGTC	3.01122	1.76375e-16	MACS_peak_2453	chr5	22250856	22251356	132	26.4	no_overlap	.	.	.	.	.	.
chr17-68685722-68686380	chr17	68685722	68686380	CGTCTCCCACGGGTTGA;TCACTACGACTCTGGGT	-0.242421	0.118523	MACS_peak_1370	chr17	68685354	68685854	132	26.4	no_overlap	.	.	.	.	.	.
chr1-144891756-144892440	chr1	144891756	144892440	GCATCGGTCTAAGGCAG	0.3662	0.184068	MACS_peak_126	chr1	144892308	144892808	132	26.4	no_overlap	.	.	.	.	.	.
chr12-50156209-50156824	chr12	50156209	50156824	AGTTTGCATGGCGAGTG	-0.107619	0.877142	MACS_peak_642	chr12	50156639	50157339	185	26.4286	MACS_peak_642	chr12	50156613	50157365	130.82	chr12-50156209-50156824	28.0585
chr17-59756487-59757004	chr17	59756487	59757004	GTGGGGACGAGGGGCGA	0.527102	0.0401108	MACS_peak_1338	chr17	59755395	59757345	517	26.5128	MACS_peak_1338	chr17	59755362	59757378	75.13	chr17-59756487-59757004	25.6448
chr17-59828087-59828818	chr17	59828087	59828818	AGGCGTCCGTGACAGGG	0.217428	0.574956	MACS_peak_1341	chr17	59826452	59829202	731	26.5818	MACS_peak_1341	chr17	59826412	59829241	63.66	chr17-59828087-59828818	25.8395
chr6-43064546-43065115	chr6	43064546	43065115	AAAGGGCAGGGTCGGTG	0.570499	0.0159307	MACS_peak_2890	chr6	43064179	43064679	133	26.6	MACS_peak_2890	chr6	43064222	43064636	100.46	chr6-43064546-43065115	21.7391
chr20-52937600-52938207	chr20	52937600	52938207	TGTAGGAGCCCGGGATG	0.192443	0.596728	MACS_peak_1954	chr20	52937123	52937773	173	26.6154	MACS_peak_1954	chr20	52937097	52937798	63.93	chr20-52937600-52938207	28.2454
chr20-53396709-53397242	chr20	53396709	53397242	CGCTGGTTAGGGGTTGG;AGAGTCCACGATGGAGT	0.00691665	0.88099	MACS_peak_1960	chr20	53396079	53398079	533	26.65	MACS_peak_1960	chr20	53396048	53398110	79.03	chr20-53396709-53397242	25.8487
chr17-59756677-59757197	chr17	59756677	59757197	TTTATGCTTAACTGGGG	-0.318118	0.513858	MACS_peak_1338	chr17	59755395	59757345	520	26.6667	MACS_peak_1338	chr17	59755362	59757378	75.13	chr17-59756677-59757197	25.7937
chr17-59698987-59699656	chr17	59698987	59699656	GCGGGGCCGGGGTGACG	0.0903893	0.854471	MACS_peak_1334	chr17	59698351	59700851	669	26.76	MACS_peak_1334	chr17	59698322	59700879	82.32	chr17-59698987-59699656	26.1635
chr3-63995368-63995906	chr3	63995368	63995906	GCACCCTTCATATGTAT	-0.0439987	0.947447	MACS_peak_2121	chr3	63995558	63996858	348	26.7692	MACS_peak_2121	chr3	63995518	63996897	66.06	chr3-63995368-63995906	28.1363
chr17-59698345-59699023	chr17	59698345	59699023	TCGGGCCCGGGACCCGG	-0.102663	0.823296	MACS_peak_1334	chr17	59698351	59700851	672	26.88	MACS_peak_1334	chr17	59698322	59700879	82.32	chr17-59698345-59699023	26.5154
chr20-53396736-53397274	chr20	53396736	53397274	ACGGCGTGATGAGTGGT;CTTGTGTCGTAAAGGGC	0.0790962	0.442158	MACS_peak_1960	chr20	53396079	53398079	538	26.9	MACS_peak_1960	chr20	53396048	53398110	79.03	chr20-53396736-53397274	26.0912
chr3-64821062-64821603	chr3	64821062	64821603	AAGGAAGCAGGAATCTG	0.0568709	0.903102	MACS_peak_2123	chr3	64821118	64822918	485	26.9444	MACS_peak_2123	chr3	64821081	64822955	121.49	chr3-64821062-64821603	27.8549
chr17-59703997-59704577	chr17	59703997	59704577	TTGTTCCCGGATTCGAT	0.172996	0.550345	MACS_peak_1335	chr17	59703280	59705430	580	26.9767	MACS_peak_1335	chr17	59703249	59705461	147.58	chr17-59703997-59704577	26.2206
chr19-38782882-38783479	chr19	38782882	38783479	TGGACTGGGCGGAAACG	-0.0169793	0.973154	MACS_peak_1509	chr19	38782517	38783017	135	27	MACS_peak_1509	chr19	38782491	38783043	167.59	chr19-38782882-38783479	29.1667
chr20-53396450-53396991	chr20	53396450	53396991	CAGTGAGGGTCCACCGT	0.0250229	0.969476	MACS_peak_1960	chr20	53396079	53398079	541	27.05	MACS_peak_1960	chr20	53396048	53398110	79.03	chr20-53396450-53396991	26.2367
chr20-53395821-53396621	chr20	53395821	53396621	AGGCGGGTGGGGCTAGG	0.0428536	0.958217	MACS_peak_1960	chr20	53396079	53398079	542	27.1	MACS_peak_1960	chr20	53396048	53398110	79.03	chr20-53395821-53396621	27.7886
chr3-64822320-64822808	chr3	64822320	64822808	CATGGTTGTCCCGGCCT	0.200542	0.637066	MACS_peak_2123	chr3	64821118	64822918	488	27.1111	MACS_peak_2123	chr3	64821081	64822955	121.49	chr3-64822320-64822808	26.0406
chr20-53396008-53396622	chr20	53396008	53396622	TTACCGACCGTTACTTG	0.202161	0.810133	MACS_peak_1960	chr20	53396079	53398079	543	27.15	MACS_peak_1960	chr20	53396048	53398110	79.03	chr20-53396008-53396622	27.8371
chr17-59698975-59699654	chr17	59698975	59699654	TGGGGAGAGTTTCGGTC	0.449082	0.391048	MACS_peak_1334	chr17	59698351	59700851	679	27.16	MACS_peak_1334	chr17	59698322	59700879	82.32	chr17-59698975-59699654	26.5546
chr17-59755823-59756353	chr17	59755823	59756353	GATGCAACGGCATTGGA	0.251437	0.390746	MACS_peak_1338	chr17	59755395	59757345	530	27.1795	MACS_peak_1338	chr17	59755362	59757378	75.13	chr17-59755823-59756353	26.2897
chr6-119558573-119558709	chr6	119558573	119558709	ATATGTTGATAAGTAGT	-0.737257	0.031515	MACS_peak_3030	chr6	119558325	119558825	136	27.2	MACS_peak_3030	chr6	119558402	119558748	121.45	chr6-119558573-119558709	39.3064
chr20-53396088-53396632	chr20	53396088	53396632	CGTACAGAGCGTGCTAA	0.80549	0.0832122	MACS_peak_1960	chr20	53396079	53398079	544	27.2	MACS_peak_1960	chr20	53396048	53398110	79.03	chr20-53396088-53396632	26.3822
chr17-59827752-59828500	chr17	59827752	59828500	ATGTTAGCTTTGTTAAT	0.0792685	0.925691	MACS_peak_1341	chr17	59826452	59829202	748	27.2	MACS_peak_1341	chr17	59826412	59829241	63.66	chr17-59827752-59828500	26.4404
chr16-71347767-71348318	chr16	71347767	71348318	GTCATGTTCAAGCCGCT	-0.42956	0.183823	MACS_peak_1180	chr16	71348182	71348682	136	27.2	MACS_peak_1180	chr16	71348299	71348565	65.12	chr16-71347767-71348318	7.14286
chr1-216957140-216957766	chr1	216957140	216957766	GACAGTGGGCAGTAGTG	-0.146826	0.723628	MACS_peak_267	chr1	216957630	216958130	136	27.2	MACS_peak_267	chr1	216957718	216958042	68.7	chr1-216957140-216957766	14.8148
chr3-6173487-6174531	chr3	6173487	6174531	TCTAGCGTAGACTGTTG	0.248753	0.407211	MACS_peak_2054	chr3	6174395	6174895	136	27.2	no_overlap	.	.	.	.	.	.
chr17-59703516-59704101	chr17	59703516	59704101	AAACGCAAGGCTAGTGA	0.051055	0.920542	MACS_peak_1335	chr17	59703280	59705430	585	27.2093	MACS_peak_1335	chr17	59703249	59705461	147.58	chr17-59703516-59704101	26.4467
chr3-64821204-64821694	chr3	64821204	64821694	ATCCAATGGGAGTGGGG	0.342004	0.496848	MACS_peak_2123	chr3	64821118	64822918	490	27.2222	MACS_peak_2123	chr3	64821081	64822955	121.49	chr3-64821204-64821694	26.1473
chr20-53057435-53058307	chr20	53057435	53058307	TAGGCCGAAATGCCGAG	-0.0126418	0.992181	MACS_peak_1956	chr20	53057263	53060463	872	27.25	MACS_peak_1956	chr20	53057217	53060508	138.64	chr20-53057435-53058307	26.4965
chr17-59703258-59703867	chr17	59703258	59703867	GTCGGTTTAGGTGGGTA	-1.33034	0.0108551	MACS_peak_1335	chr17	59703280	59705430	587	27.3023	MACS_peak_1335	chr17	59703249	59705461	147.58	chr17-59703258-59703867	27.5316
chr20-53366033-53366497	chr20	53366033	53366497	AGTATGTGACTTGGTTC	0.359198	0.542765	MACS_peak_1959	chr20	53365088	53366388	355	27.3077	MACS_peak_1959	chr20	53365044	53366431	65.2	chr20-53366033-53366497	28.695
chr17-59699008-59699691	chr17	59699008	59699691	CGGAGTATGTGCGTGCA	0.385798	0.409904	MACS_peak_1334	chr17	59698351	59700851	683	27.32	MACS_peak_1334	chr17	59698322	59700879	82.32	chr17-59699008-59699691	26.711
chr20-53058129-53059004	chr20	53058129	53059004	TGAACAGGGCCTCACGA	0.196036	0.783305	MACS_peak_1956	chr20	53057263	53060463	875	27.3438	MACS_peak_1956	chr20	53057217	53060508	138.64	chr20-53058129-53059004	26.5877
chr17-59827464-59828216	chr17	59827464	59828216	GCTGCGTTTGTACGTAT	1.14002	0.0027102	MACS_peak_1341	chr17	59826452	59829202	752	27.3455	MACS_peak_1341	chr17	59826412	59829241	63.66	chr17-59827464-59828216	26.5818
chr17-59827735-59828488	chr17	59827735	59828488	TGCAGGGGGGGTGCGGG	-0.31356	0.355005	MACS_peak_1341	chr17	59826452	59829202	753	27.3818	MACS_peak_1341	chr17	59826412	59829241	63.66	chr17-59827735-59828488	26.6172
chr3-64821050-64821611	chr3	64821050	64821611	GGGGAGCTACGGTGTGG	0.514504	0.282836	MACS_peak_2123	chr3	64821118	64822918	493	27.3889	MACS_peak_2123	chr3	64821081	64822955	121.49	chr3-64821050-64821611	28.2818
chr3-64821138-64821631	chr3	64821138	64821631	AATGAGTCTGCCCGTGG;AAATCTGGGGGGAGAGC	0.194292	0.714427	MACS_peak_2123	chr3	64821118	64822918	493	27.3889	MACS_peak_2123	chr3	64821081	64822955	121.49	chr3-64821138-64821631	26.3074
chr17-59698301-59699036	chr17	59698301	59699036	GTCTTTTCTTAGAATAA	-0.136484	0.746434	MACS_peak_1334	chr17	59698351	59700851	685	27.4	MACS_peak_1334	chr17	59698322	59700879	82.32	chr17-59698301-59699036	27.9233
chr15-72499325-72499912	chr15	72499325	72499912	TCGTGAGCTGCTAATAA;TCTGGGACGGGGCACGG	-0.0926473	0.928817	MACS_peak_1083	chr15	72498962	72499462	137	27.4	MACS_peak_1083	chr15	72499035	72499388	87.95	chr15-72499325-72499912	17.847
chr11-10821300-10821894	chr11	10821300	10821894	AATCTCATCAGGTTGTT	0.0891485	0.802827	MACS_peak_453	chr11	10820937	10821437	137	27.4	MACS_peak_453	chr11	10821072	10821301	77.46	chr11-10821300-10821894	0.436681
chr3-3326694-3327271	chr3	3326694	3327271	CCTGTGCGGCATGGGCG	-0.284212	0.451225	MACS_peak_2046	chr3	3326331	3326831	137	27.4	no_overlap	.	.	.	.	.	.
chr22-29191385-29191890	chr22	29191385	29191890	CGACTATTGTTAGAGCT	-0.140283	0.80351	MACS_peak_2007	chr22	29190768	29191618	233	27.4118	MACS_peak_2007	chr22	29190720	29191665	439.82	chr22-29191385-29191890	29.6296
chr17-59755882-59756417	chr17	59755882	59756417	CATGGGGAGTGAGTCGG	0.151876	0.798872	MACS_peak_1338	chr17	59755395	59757345	535	27.4359	MACS_peak_1338	chr17	59755362	59757378	75.13	chr17-59755882-59756417	26.5377
chr20-53396301-53396850	chr20	53396301	53396850	ATTTTGGGGTACTTTGG	-0.501051	0.240219	MACS_peak_1960	chr20	53396079	53398079	549	27.45	MACS_peak_1960	chr20	53396048	53398110	79.03	chr20-53396301-53396850	26.6246
chr17-59698279-59699038	chr17	59698279	59699038	AGTTAGCACTCCTGGCG	-0.130718	0.847938	MACS_peak_1334	chr17	59698351	59700851	687	27.48	MACS_peak_1334	chr17	59698322	59700879	82.32	chr17-59698279-59699038	28.0016
chr17-59704290-59704881	chr17	59704290	59704881	ATTCTCGTCCACGCCGA	0.121183	0.834827	MACS_peak_1335	chr17	59703280	59705430	591	27.4884	MACS_peak_1335	chr17	59703249	59705461	147.58	chr17-59704290-59704881	26.7179
chr17-59828113-59828869	chr17	59828113	59828869	GTATGCCTTGTCGGTGG;GTTTTGGTAGCGGGGGA	-0.0776599	0.96874	MACS_peak_1341	chr17	59826452	59829202	756	27.4909	MACS_peak_1341	chr17	59826412	59829241	63.66	chr17-59828113-59828869	26.7232
chr20-53396173-53396723	chr20	53396173	53396723	GAGGTGTTGGTCCTACG	0.188259	0.53086	MACS_peak_1960	chr20	53396079	53398079	550	27.5	MACS_peak_1960	chr20	53396048	53398110	79.03	chr20-53396173-53396723	26.6731
chr20-53057820-53058701	chr20	53057820	53058701	TGTTTGAGCTCGGACGG	0.599829	0.126341	MACS_peak_1956	chr20	53057263	53060463	881	27.5312	MACS_peak_1956	chr20	53057217	53060508	138.64	chr20-53057820-53058701	26.77
chr20-52936760-52937302	chr20	52936760	52937302	ATGCCCCTGGCCAAATC	0.267831	0.602	MACS_peak_1954	chr20	52937123	52937773	179	27.5385	MACS_peak_1954	chr20	52937097	52937798	63.93	chr20-52936760-52937302	29.2439
chr20-53059346-53060228	chr20	53059346	53060228	GAGGTCAATAGACGGGG	-0.00437361	0.993767	MACS_peak_1956	chr20	53057263	53060463	882	27.5625	MACS_peak_1956	chr20	53057217	53060508	138.64	chr20-53059346-53060228	26.8004
chr17-59623567-59623972	chr17	59623567	59623972	GTAGATCCCCGTGTGAA	0.427246	0.147112	MACS_peak_1332	chr17	59623655	59624805	317	27.5652	MACS_peak_1332	chr17	59623628	59624831	95.3	chr17-59623567-59623972	28.5952
chr17-59704452-59705045	chr17	59704452	59705045	GAAGAGTTGAGAGTTCG	0.700555	0.000957836	MACS_peak_1335	chr17	59703280	59705430	593	27.5814	MACS_peak_1335	chr17	59703249	59705461	147.58	chr17-59704452-59705045	26.8083
chr17-59704309-59704902	chr17	59704309	59704902	CGGGACCCCGGAGCCGG	0.534805	0.435802	MACS_peak_1335	chr17	59703280	59705430	593	27.5814	MACS_peak_1335	chr17	59703249	59705461	147.58	chr17-59704309-59704902	26.8083
chr5-43893481-43894013	chr5	43893481	43894013	CGAGAAAGAGGGGGCAG	0.247135	0.421588	MACS_peak_2546	chr5	43893119	43893619	138	27.6	MACS_peak_2546	chr5	43893186	43893552	82.58	chr5-43893481-43894013	19.3989
chr2-46662467-46663004	chr2	46662467	46663004	CTAAGCAGTAGATCCCA	0.0120501	0.982343	MACS_peak_1628	chr2	46662105	46662605	138	27.6	MACS_peak_1628	chr2	46662181	46662529	122.8	chr2-46662467-46663004	17.8161
chr17-59698860-59699550	chr17	59698860	59699550	GATCATAGGCTCTATAT	-0.415886	0.553449	MACS_peak_1334	chr17	59698351	59700851	690	27.6	MACS_peak_1334	chr17	59698322	59700879	82.32	chr17-59698860-59699550	26.9847
chr17-58922977-58923795	chr17	58922977	58923795	TGGACTCAATGTATTCG	-0.927304	0.0641785	MACS_peak_1329	chr17	58922615	58923115	138	27.6	MACS_peak_1329	chr17	58922583	58923147	177.8	chr17-58922977-58923795	30.1418
chr20-53366029-53366588	chr20	53366029	53366588	AATATGTTCGGGAGTAC	0.0839136	0.939087	MACS_peak_1959	chr20	53365088	53366388	359	27.6154	MACS_peak_1959	chr20	53365044	53366431	65.2	chr20-53366029-53366588	28.9834
chr17-59699184-59699875	chr17	59699184	59699875	GCCACCGCCGGGCATTA	-0.389481	0.361817	MACS_peak_1334	chr17	59698351	59700851	691	27.64	MACS_peak_1334	chr17	59698322	59700879	82.32	chr17-59699184-59699875	27.0239
chr20-53057575-53058461	chr20	53057575	53058461	GCGGGGTGACCGTCAGG	0.0966909	0.825426	MACS_peak_1956	chr20	53057263	53060463	886	27.6875	MACS_peak_1956	chr20	53057217	53060508	138.64	chr20-53057575-53058461	26.9219
chr20-53396800-53397354	chr20	53396800	53397354	AATCAGTGGGGACACGT	-0.592501	0.211094	MACS_peak_1960	chr20	53396079	53398079	554	27.7	MACS_peak_1960	chr20	53396048	53398110	79.03	chr20-53396800-53397354	26.8671
chr17-59703699-59704295	chr17	59703699	59704295	GCGTGGATAGGGACGCC	-0.173275	0.805019	MACS_peak_1335	chr17	59703280	59705430	596	27.7209	MACS_peak_1335	chr17	59703249	59705461	147.58	chr17-59703699-59704295	26.9439
chr20-53057626-53058514	chr20	53057626	53058514	GCCGTCGCGGAGGGTCG	-0.0463465	0.944011	MACS_peak_1956	chr20	53057263	53060463	888	27.75	MACS_peak_1956	chr20	53057217	53060508	138.64	chr20-53057626-53058514	26.9827
chr17-59756572-59757114	chr17	59756572	59757114	TTCGCATGCGGGAGGGG	-0.269606	0.702661	MACS_peak_1338	chr17	59755395	59757345	542	27.7949	MACS_peak_1338	chr17	59755362	59757378	75.13	chr17-59756572-59757114	26.8849
chr5-149143901-149144739	chr5	149143901	149144739	CATGTCATGCCCTCCAC	-0.755503	0.0781257	MACS_peak_2775	chr5	149144600	149145100	139	27.8	MACS_peak_2775	chr5	149144695	149145005	61.27	chr5-149143901-149144739	14.1935
chr20-53396196-53396752	chr20	53396196	53396752	GCTATCTGCGTGGACGG	-0.343583	0.460459	MACS_peak_1960	chr20	53396079	53398079	556	27.8	MACS_peak_1960	chr20	53396048	53398110	79.03	chr20-53396196-53396752	26.9641
chr3-6173991-6174534	chr3	6173991	6174534	GATGTGTTTGGCGAGGT	0.0818612	0.884944	MACS_peak_2054	chr3	6174395	6174895	139	27.8	no_overlap	.	.	.	.	.	.
chr17-59700062-59700758	chr17	59700062	59700758	GCTGTTGGTAGTCTTCG	-0.498516	0.0447495	MACS_peak_1334	chr17	59698351	59700851	696	27.84	MACS_peak_1334	chr17	59698322	59700879	82.32	chr17-59700062-59700758	27.2194
chr3-64770339-64770826	chr3	64770339	64770826	TTATGCTCGCTCTAGCC;TGTAGTGGCCGAAGGAG	-0.0622487	0.973584	MACS_peak_2122	chr3	64770603	64771403	223	27.875	MACS_peak_2122	chr3	64770575	64771431	100.22	chr3-64770339-64770826	29.3224
chr17-59699166-59699863	chr17	59699166	59699863	GCCGATATTAGTGAGGT	-0.51955	0.0712571	MACS_peak_1334	chr17	59698351	59700851	697	27.88	MACS_peak_1334	chr17	59698322	59700879	82.32	chr17-59699166-59699863	27.2585
chr17-59698859-59699557	chr17	59698859	59699557	ATATGGTGGGAGCAATG	-0.559365	0.0922651	MACS_peak_1334	chr17	59698351	59700851	698	27.92	MACS_peak_1334	chr17	59698322	59700879	82.32	chr17-59698859-59699557	27.2976
chr7-152686534-152687165	chr7	152686534	152687165	GGGGAGGTGTCGGGGAG	3.67601	1.02516e-27	MACS_peak_3246	chr7	152687025	152687525	140	28	MACS_peak_3245	chr7	152686735	152687015	78.36	chr7-152686534-152687165	100
chr5-163547238-163547901	chr5	163547238	163547901	TTTTAGGGCGCGGGTGT;GGACAGGGGTGCTCAAT	-0.127705	0.650215	MACS_peak_2802	chr5	163546878	163547378	140	28	MACS_peak_2802	chr5	163546880	163547376	244.62	chr5-163547238-163547901	27.8226
chr5-43802389-43802953	chr5	43802389	43802953	TGGGGGAATACAAATGG	-0.491673	0.0709557	MACS_peak_2541	chr5	43802813	43803313	140	28	MACS_peak_2541	chr5	43802930	43803196	66.53	chr5-43802389-43802953	8.64662
chr17-59704547-59705149	chr17	59704547	59705149	GGGACTGGGGAGCGAGG	-0.0959431	0.874682	MACS_peak_1335	chr17	59703280	59705430	602	28	MACS_peak_1335	chr17	59703249	59705461	147.58	chr17-59704547-59705149	27.2152
chr15-52156890-52157369	chr15	52156890	52157369	GCTAATGCGGGCTAGCA	-0.0637616	0.932027	MACS_peak_1025	chr15	52156494	52157044	154	28	MACS_peak_1025	chr15	52156465	52157073	169.77	chr15-52156890-52157369	30.0987
chr6-79419822-79420323	chr6	79419822	79420323	AAGACCGTCAGAGTGTC;GGGCGCTTGCGGTGCCG	-1.16084	0.0143299	MACS_peak_2960	chr6	79419462	79419962	140	28	no_overlap	.	.	.	.	.	.
chr17-59756572-59757119	chr17	59756572	59757119	CGCCACATGAGGAAGGG	0.316708	0.617003	MACS_peak_1338	chr17	59755395	59757345	547	28.0513	MACS_peak_1338	chr17	59755362	59757378	75.13	chr17-59756572-59757119	27.1329
chr17-59698548-59699250	chr17	59698548	59699250	GAATTGTGGAATGCCTG	-0.292537	0.358121	MACS_peak_1334	chr17	59698351	59700851	702	28.08	MACS_peak_1334	chr17	59698322	59700879	82.32	chr17-59698548-59699250	27.454
chr17-59704698-59705302	chr17	59704698	59705302	TGCAGCGATCAGAATGG	0.136418	0.654128	MACS_peak_1335	chr17	59703280	59705430	604	28.093	MACS_peak_1335	chr17	59703249	59705461	147.58	chr17-59704698-59705302	27.3056
chr3-64821019-64821625	chr3	64821019	64821625	GACGGGCGGGGGGTGCA	-0.149327	0.681288	MACS_peak_2123	chr3	64821118	64822918	507	28.1667	MACS_peak_2123	chr3	64821081	64822955	121.49	chr3-64821019-64821625	29.0288
chr17-59703360-59703966	chr17	59703360	59703966	CGTGAAGTTGAGAGCGT	-0.980671	0.103517	MACS_peak_1335	chr17	59703280	59705430	606	28.186	MACS_peak_1335	chr17	59703249	59705461	147.58	chr17-59703360-59703966	27.396
chr7-110238076-110238712	chr7	110238076	110238712	GTGTAAATGGTCATTGA	-0.0387786	0.920861	MACS_peak_3189	chr7	110237717	110238217	141	28.2	MACS_peak_3189	chr7	110237839	110238095	73	chr7-110238076-110238712	7.42188
chr20-55487495-55488278	chr20	55487495	55488278	ATGGTAACGTCGGCGAT	0.591091	0.185513	MACS_peak_1964	chr20	55487136	55487636	141	28.2	MACS_peak_1964	chr20	55487254	55487517	62.23	chr20-55487495-55488278	8.36502
chr20-53396310-53396874	chr20	53396310	53396874	CACAGGGTCCCCAGAGC	0.0227477	0.97577	MACS_peak_1960	chr20	53396079	53398079	564	28.2	MACS_peak_1960	chr20	53396048	53398110	79.03	chr20-53396310-53396874	27.3521
chr17-59698939-59699644	chr17	59698939	59699644	GGGCATCCGTTTAACTC	-0.0989394	0.839773	MACS_peak_1334	chr17	59698351	59700851	705	28.2	MACS_peak_1334	chr17	59698322	59700879	82.32	chr17-59698939-59699644	27.5714
chr14-94698546-94698826	chr14	94698546	94698826	TGTGACCGCGAATCAGG;GTTCAGTTTAGTTTAGT	0.0294096	0.78619	MACS_peak_975	chr14	94698685	94699185	141	28.2	MACS_peak_975	chr14	94698809	94699061	63.14	chr14-94698546-94698826	6.74603
chr1-107364411-107364693	chr1	107364411	107364693	TTCGGAGTGTCGGGTTT	-1.01642	0.0271775	MACS_peak_99	chr1	107363910	107364910	282	28.2	MACS_peak_99	chr1	107363877	107364942	66.63	chr1-107364411-107364693	26.4789
chr17-59703389-59703996	chr17	59703389	59703996	GAGATTAGGCCGTGGAG	-1.50866	0.00182526	MACS_peak_1335	chr17	59703280	59705430	607	28.2326	MACS_peak_1335	chr17	59703249	59705461	147.58	chr17-59703389-59703996	27.4412
chr20-53396434-53396999	chr20	53396434	53396999	CTCTGTATGAAGTATCT	-0.0954107	0.876999	MACS_peak_1960	chr20	53396079	53398079	565	28.25	MACS_peak_1960	chr20	53396048	53398110	79.03	chr20-53396434-53396999	27.4006
chr3-64821076-64821627	chr3	64821076	64821627	TCCGGGGTGGACGGTGC	0.0340374	0.939329	MACS_peak_2123	chr3	64821118	64822918	509	28.2778	MACS_peak_2123	chr3	64821081	64822955	121.49	chr3-64821076-64821627	29.1355
chr17-59699006-59699713	chr17	59699006	59699713	CCTGGCTAACGCGTGGA	0.430939	0.40974	MACS_peak_1334	chr17	59698351	59700851	707	28.28	MACS_peak_1334	chr17	59698322	59700879	82.32	chr17-59699006-59699713	27.6496
chr17-59704540-59705149	chr17	59704540	59705149	TAGCGGTAGAGGATGTC	0.0492287	0.947295	MACS_peak_1335	chr17	59703280	59705430	609	28.3256	MACS_peak_1335	chr17	59703249	59705461	147.58	chr17-59704540-59705149	27.5316
chr17-59704788-59705397	chr17	59704788	59705397	CGCGTGTAGCTAGCTTA	-0.377591	0.387345	MACS_peak_1335	chr17	59703280	59705430	609	28.3256	MACS_peak_1335	chr17	59703249	59705461	147.58	chr17-59704788-59705397	27.5316
chr17-59703283-59703893	chr17	59703283	59703893	GGGCTAGATGAGCGGCA;GGAAGGGGGGGGTCTGG	-1.19931	0.00994647	MACS_peak_1335	chr17	59703280	59705430	610	28.3721	MACS_peak_1335	chr17	59703249	59705461	147.58	chr17-59703283-59703893	27.5769
chr3-64771176-64771749	chr3	64771176	64771749	GAGGAAAGAGGGTGGTC	0.192745	0.771081	MACS_peak_2122	chr3	64770603	64771403	227	28.375	MACS_peak_2122	chr3	64770575	64771431	100.22	chr3-64771176-64771749	29.7897
chr5-165259083-165259426	chr5	165259083	165259426	GGACAGGTCGCGCCCTC	-0.224823	0.617003	MACS_peak_2807	chr5	165259284	165259784	142	28.4	MACS_peak_2807	chr5	165259397	165259671	70.3	chr5-165259083-165259426	10.5839
chr5-43802446-43802955	chr5	43802446	43802955	GGGGCCCCAGTTGGTTT	0.794219	0.0278493	MACS_peak_2541	chr5	43802813	43803313	142	28.4	MACS_peak_2541	chr5	43802930	43803196	66.53	chr5-43802446-43802955	9.3985
chr5-43081015-43081752	chr5	43081015	43081752	CGGTGGGCTGTGGGGGG	-0.13994	0.679217	MACS_peak_2526	chr5	43080657	43081157	142	28.4	MACS_peak_2526	chr5	43080724	43081089	69.19	chr5-43081015-43081752	20.274
chr5-24992327-24992921	chr5	24992327	24992921	AACGGTGCATAAGGATA	-0.189361	0.504321	MACS_peak_2460	chr5	24992779	24993279	142	28.4	MACS_peak_2460	chr5	24992899	24993158	62.17	chr5-24992327-24992921	8.49421
chr2-171421917-171422657	chr2	171421917	171422657	GGAGTGGCGGAGTGGGG	-0.18745	0.743036	MACS_peak_1778	chr2	171422515	171423015	142	28.4	MACS_peak_1778	chr2	171422653	171422876	61.54	chr2-171421917-171422657	1.79372
chr1-10327947-10328515	chr1	10327947	10328515	CTTGATCTTGCGAGATG	-0.163907	0.68754	MACS_peak_15	chr1	10328373	10328873	142	28.4	MACS_peak_15	chr1	10328509	10328736	89.16	chr1-10327947-10328515	2.64317
chr2-53199205-53199706	chr2	53199205	53199706	GCCGGCTGGGCGGGTGG	0.0793417	0.824329	MACS_peak_1635	chr2	53199564	53200064	142	28.4	no_overlap	.	.	.	.	.	.
chr17-59704639-59705250	chr17	59704639	59705250	GCCTAATCGGGGCACGC	0.255674	0.358464	MACS_peak_1335	chr17	59703280	59705430	611	28.4186	MACS_peak_1335	chr17	59703249	59705461	147.58	chr17-59704639-59705250	27.6221
chr17-59704521-59705132	chr17	59704521	59705132	CCCACTTTCCGCAGTGC	-0.904689	0.000296408	MACS_peak_1335	chr17	59703280	59705430	611	28.4186	MACS_peak_1335	chr17	59703249	59705461	147.58	chr17-59704521-59705132	27.6221
chr17-59827520-59828302	chr17	59827520	59828302	TTGGAATGGTTATGTTG	-0.968579	5.4428e-07	MACS_peak_1341	chr17	59826452	59829202	782	28.4364	MACS_peak_1341	chr17	59826412	59829241	63.66	chr17-59827520-59828302	27.6423
chr20-52937588-52937866	chr20	52937588	52937866	CACTCGGCCAGGTCAGC	-0.243403	0.628064	MACS_peak_1954	chr20	52937123	52937773	185	28.4615	MACS_peak_1954	chr20	52937097	52937798	63.93	chr20-52937588-52937866	29.9572
chr3-64821405-64821918	chr3	64821405	64821918	TAAGAACGAGCATTTAC;GGGGATAGGTAGCAGAT	0.0903795	0.776407	MACS_peak_2123	chr3	64821118	64822918	513	28.5	MACS_peak_2123	chr3	64821081	64822955	121.49	chr3-64821405-64821918	27.3746
chr3-63995388-63995929	chr3	63995388	63995929	GGCTGTAGTACGGGAGA	0.16533	0.810766	MACS_peak_2121	chr3	63995558	63996858	371	28.5385	MACS_peak_2121	chr3	63995518	63996897	66.06	chr3-63995388-63995929	29.8042
chr17-59698270-59699065	chr17	59698270	59699065	CTGCCAGCGAACAAGAG	-0.0176912	0.97982	MACS_peak_1334	chr17	59698351	59700851	714	28.56	MACS_peak_1334	chr17	59698322	59700879	82.32	chr17-59698270-59699065	29.0575
chr17-59756508-59757065	chr17	59756508	59757065	CGGGTTCCCCCAGTGGG	0.157344	0.792034	MACS_peak_1338	chr17	59755395	59757345	557	28.5641	MACS_peak_1338	chr17	59755362	59757378	75.13	chr17-59756508-59757065	27.629
chr20-10714141-10714709	chr20	10714141	10714709	CGTTGTGAGGTTCGTTT	0.0557261	0.93826	MACS_peak_1904	chr20	10713784	10714284	143	28.6	MACS_peak_1904	chr20	10713781	10714287	154.74	chr20-10714141-10714709	28.8538
chr17-59755915-59756473	chr17	59755915	59756473	TTTGTGGTAGGAGTAAC	0.288697	0.524691	MACS_peak_1338	chr17	59755395	59757345	558	28.6154	MACS_peak_1338	chr17	59755362	59757378	75.13	chr17-59755915-59756473	27.6786
chr17-59698956-59699672	chr17	59698956	59699672	TAGCGCGGCGCCGGCTC	-0.324691	0.724358	MACS_peak_1334	chr17	59698351	59700851	716	28.64	MACS_peak_1334	chr17	59698322	59700879	82.32	chr17-59698956-59699672	28.0016
chr17-59755930-59756490	chr17	59755930	59756490	GTAGCCGTGGAGCGGGG	0.581458	0.143955	MACS_peak_1338	chr17	59755395	59757345	560	28.7179	MACS_peak_1338	chr17	59755362	59757378	75.13	chr17-59755930-59756490	27.7778
chr17-59698876-59699595	chr17	59698876	59699595	CAAGCTAAGCTGGGGGC	0.371689	0.370081	MACS_peak_1334	chr17	59698351	59700851	719	28.76	MACS_peak_1334	chr17	59698322	59700879	82.32	chr17-59698876-59699595	28.1189
chr20-53365603-53365977	chr20	53365603	53365977	CCTGGGTACCGGAGGCC;GAAGTGTAGGTGCGATC	0.0138225	0.994249	MACS_peak_1959	chr20	53365088	53366388	374	28.7692	MACS_peak_1959	chr20	53365044	53366431	65.2	chr20-53365603-53365977	26.9647
chr10-21716907-21717538	chr10	21716907	21717538	GGGGTGGCCGAACCACA	-0.0928178	0.840967	MACS_peak_329	chr10	21716551	21717051	144	28.8	MACS_peak_329	chr10	21716507	21717095	124.07	chr10-21716907-21717538	31.9728
chr3-64821188-64821707	chr3	64821188	64821707	GGTTGAGAGGAAAAGTA	-0.207439	0.665366	MACS_peak_2123	chr3	64821118	64822918	519	28.8333	MACS_peak_2123	chr3	64821081	64822955	121.49	chr3-64821188-64821707	27.6948
chr17-59756556-59757119	chr17	59756556	59757119	TTAAAGGGCAACTATTT	0.278481	0.308898	MACS_peak_1338	chr17	59755395	59757345	563	28.8718	MACS_peak_1338	chr17	59755362	59757378	75.13	chr17-59756556-59757119	27.9266
chr20-53396983-53397561	chr20	53396983	53397561	CGCACGGGTGCGGTGGG	0.306475	0.376723	MACS_peak_1960	chr20	53396079	53398079	578	28.9	MACS_peak_1960	chr20	53396048	53398110	79.03	chr20-53396983-53397561	28.031
chr17-59756699-59757263	chr17	59756699	59757263	TCCGTTCCTAAGGCCTT;ACCCGGGAGGTCTGTAG	-0.0297729	0.792955	MACS_peak_1338	chr17	59755395	59757345	564	28.9231	MACS_peak_1338	chr17	59755362	59757378	75.13	chr17-59756699-59757263	27.9762
chr1-205683633-205684276	chr1	205683633	205684276	TTTGTGTCTAATTGGAC	-0.102509	0.809085	MACS_peak_252	chr1	205684088	205684738	188	28.9231	MACS_peak_251	chr1	205683444	205683920	76.41	chr1-205683633-205684276	60.2941
chr17-59704577-59705199	chr17	59704577	59705199	GACCCCGACGCACGCCA	-0.165503	0.705662	MACS_peak_1335	chr17	59703280	59705430	622	28.9302	MACS_peak_1335	chr17	59703249	59705461	147.58	chr17-59704577-59705199	28.1193
chr6-102500641-102501235	chr6	102500641	102501235	AAATGGTGGTCCAGCGG	-0.114093	0.756599	MACS_peak_3008	chr6	102501090	102501590	145	29	MACS_peak_3008	chr6	102501169	102501511	70.02	chr6-102500641-102501235	19.2982
chr5-44056921-44057444	chr5	44056921	44057444	AGGGACAGCTGGGCGGG;CCGAATGGATTGTCCGT	-0.679332	9.15319e-05	MACS_peak_2552	chr5	44056566	44057066	145	29	MACS_peak_2552	chr5	44056697	44056934	95.79	chr5-44056921-44057444	5.48523
chr8-132149175-132149632	chr8	132149175	132149632	CCCGAAGCATACACGGG	0.0581186	0.944878	MACS_peak_3418	chr8	132149487	132149987	145	29	no_overlap	.	.	.	.	.	.
chr6-79419817-79420453	chr6	79419817	79420453	TTTACAGACCGGGAGCG	0.15559	0.789257	MACS_peak_2960	chr6	79419462	79419962	145	29	no_overlap	.	.	.	.	.	.
chr3-76109947-76110471	chr3	76109947	76110471	GGATGCGAGCGGAGATG;GTTTGTTGTTTGGTGAC	0.133118	0.813541	MACS_peak_2132	chr3	76109592	76110092	145	29	no_overlap	.	.	.	.	.	.
chr17-59756453-59757019	chr17	59756453	59757019	GAGAAATATCGCACGCA	0.247658	0.541721	MACS_peak_1338	chr17	59755395	59757345	566	29.0256	MACS_peak_1338	chr17	59755362	59757378	75.13	chr17-59756453-59757019	28.0754
chr17-59756377-59756943	chr17	59756377	59756943	TAGGTTGCACGGGGTGT	-0.283641	0.667688	MACS_peak_1338	chr17	59755395	59757345	566	29.0256	MACS_peak_1338	chr17	59755362	59757378	75.13	chr17-59756377-59756943	28.0754
chr17-59827527-59828326	chr17	59827527	59828326	ACTGGGGGGCTGCGGCG	-0.62706	0.0146312	MACS_peak_1341	chr17	59826452	59829202	799	29.0545	MACS_peak_1341	chr17	59826412	59829241	63.66	chr17-59827527-59828326	28.2432
chr3-64821457-64821981	chr3	64821457	64821981	GTCGGGACACTGGCCGG	3.91037	1.22106e-17	MACS_peak_2123	chr3	64821118	64822918	524	29.1111	MACS_peak_2123	chr3	64821081	64822955	121.49	chr3-64821457-64821981	27.9616
chr17-59756659-59757228	chr17	59756659	59757228	GGCCTTGAATCCTAGGT	0.287374	0.502921	MACS_peak_1338	chr17	59755395	59757345	569	29.1795	MACS_peak_1338	chr17	59755362	59757378	75.13	chr17-59756659-59757228	28.2242
chr8-31029468-31030000	chr8	31029468	31030000	ACGGATGTTCTGGGGTG	-0.100305	0.845952	MACS_peak_3291	chr8	31029854	31030354	146	29.2	MACS_peak_3291	chr8	31029829	31030378	175.69	chr8-31029468-31030000	31.1475
chr6-119558560-119558706	chr6	119558560	119558706	GTTGGTGTCGGTATGGG	-2.11601	3.57089e-06	MACS_peak_3030	chr6	119558325	119558825	146	29.2	MACS_peak_3030	chr6	119558402	119558748	121.45	chr6-119558560-119558706	42.1965
chr10-99410891-99411469	chr10	99410891	99411469	GTATTCCGCTGCTCTGA	2.16648	1.76448e-12	MACS_peak_399	chr10	99411323	99411823	146	29.2	MACS_peak_399	chr10	99411325	99411821	190.92	chr10-99410891-99411469	29.0323
chr20-53366008-53366616	chr20	53366008	53366616	TGCGGCACGCTCGTTAG	-1.61993	4.46366e-16	MACS_peak_1959	chr20	53365088	53366388	380	29.2308	MACS_peak_1959	chr20	53365044	53366431	65.2	chr20-53366008-53366616	30.4975
chr17-59704479-59705108	chr17	59704479	59705108	GTTCTGGAGGTTCTCGA	-0.3038	0.368899	MACS_peak_1335	chr17	59703280	59705430	629	29.2558	MACS_peak_1335	chr17	59703249	59705461	147.58	chr17-59704479-59705108	28.4358
chr17-59699197-59699930	chr17	59699197	59699930	GGAGGAGGGTGAACGTT	3.76533	2.0447e-22	MACS_peak_1334	chr17	59698351	59700851	733	29.32	MACS_peak_1334	chr17	59698322	59700879	82.32	chr17-59699197-59699930	28.6664
chr17-59698679-59699413	chr17	59698679	59699413	TGTCTGACATTTTTAGG	-0.741398	0.180094	MACS_peak_1334	chr17	59698351	59700851	734	29.36	MACS_peak_1334	chr17	59698322	59700879	82.32	chr17-59698679-59699413	28.7055
chr17-59828100-59828908	chr17	59828100	59828908	TTGTAGCATTGTTAGTC	-0.0557974	0.933573	MACS_peak_1341	chr17	59826452	59829202	808	29.3818	MACS_peak_1341	chr17	59826412	59829241	63.66	chr17-59828100-59828908	28.5613
chr17-59755861-59756435	chr17	59755861	59756435	GAGCTCATACGGGAGGG	0.78113	0.0381281	MACS_peak_1338	chr17	59755395	59757345	574	29.4359	MACS_peak_1338	chr17	59755362	59757378	75.13	chr17-59755861-59756435	28.4722
chrX-4628304-4628750	chrX	4628304	4628750	AGGTTGCGGAGGACGGG	0.188261	0.733386	MACS_peak_3574	chrX	4628588	4629138	162	29.4545	MACS_peak_3574	chrX	4628539	4629186	458.98	chrX-4628304-4628750	32.6121
chr17-59755923-59756498	chr17	59755923	59756498	AGTTAATGAGGACCTAT	0.429617	0.148999	MACS_peak_1338	chr17	59755395	59757345	575	29.4872	MACS_peak_1338	chr17	59755362	59757378	75.13	chr17-59755923-59756498	28.5218
chr3-64821082-64821649	chr3	64821082	64821649	ACGGGACAGATCGATGG	-0.747585	0.118107	MACS_peak_2123	chr3	64821118	64822918	531	29.5	MACS_peak_2123	chr3	64821081	64822955	121.49	chr3-64821082-64821649	30.2561
chr3-64821747-64822279	chr3	64821747	64822279	GTTGGCCTAATAGGTGG	3.83829	1.22034e-25	MACS_peak_2123	chr3	64821118	64822918	532	29.5556	MACS_peak_2123	chr3	64821081	64822955	121.49	chr3-64821747-64822279	28.3885
chr17-59698548-59699288	chr17	59698548	59699288	GACGGTATGGAGCTGTG	-0.5729	0.140248	MACS_peak_1334	chr17	59698351	59700851	740	29.6	MACS_peak_1334	chr17	59698322	59700879	82.32	chr17-59698548-59699288	28.9402
chr10-29259065-29259634	chr10	29259065	29259634	AGCGTTTGGTGGTGGTG	-0.436582	0.520553	MACS_peak_340	chr10	29258713	29259213	148	29.6	MACS_peak_340	chr10	29258824	29259102	72.87	chr10-29259065-29259634	13.3094
chr3-64821092-64821651	chr3	64821092	64821651	ATTGCATTGGCGGTGAT	-0.147272	0.852446	MACS_peak_2123	chr3	64821118	64822918	533	29.6111	MACS_peak_2123	chr3	64821081	64822955	121.49	chr3-64821092-64821651	29.8292
chr20-53396573-53397168	chr20	53396573	53397168	GGTAGCCACAGTGCCGA;GCAGGGAGGAAGGGGCG	-0.06713	0.218117	MACS_peak_1960	chr20	53396079	53398079	595	29.75	MACS_peak_1960	chr20	53396048	53398110	79.03	chr20-53396573-53397168	28.8555
chr17-59828095-59828914	chr17	59828095	59828914	GTGAACGGCATTGAGGA	-0.150669	0.697756	MACS_peak_1341	chr17	59826452	59829202	819	29.7818	MACS_peak_1341	chr17	59826412	59829241	63.66	chr17-59828095-59828914	28.9502
chr6-119558560-119558709	chr6	119558560	119558709	TGTTGCGTAGGTCAACG	-1.32773	0.000318859	MACS_peak_3030	chr6	119558325	119558825	149	29.8	MACS_peak_3030	chr6	119558402	119558748	121.45	chr6-119558560-119558709	43.0636
chr20-53396725-53397321	chr20	53396725	53397321	ATGTTGGACCGGATAGC	0.54565	0.0653429	MACS_peak_1960	chr20	53396079	53398079	596	29.8	MACS_peak_1960	chr20	53396048	53398110	79.03	chr20-53396725-53397321	28.904
chr1-111906916-111907677	chr1	111906916	111907677	TAATGCCGGGTTTAGTC	3.23055	9.6841e-13	MACS_peak_112	chr1	111907528	111908028	149	29.8	MACS_peak_111	chr1	111907180	111907498	106.13	chr1-111906916-111907677	100
chr8-113066559-113067071	chr8	113066559	113067071	GGTAGAGGGTCATTCGG	0.0143322	0.984112	MACS_peak_3375	chr8	113066922	113067422	149	29.8	no_overlap	.	.	.	.	.	.
chr3-63996470-63997418	chr3	63996470	63997418	TGGAACTGCGGTGCGTC	0.613047	0.0050798	MACS_peak_2121	chr3	63995558	63996858	388	29.8462	MACS_peak_2121	chr3	63995518	63996897	66.06	chr3-63996470-63997418	30.9645
chr20-52936599-52937317	chr20	52936599	52937317	GGTCCACGTGGCCAGGG	-0.256881	0.499006	MACS_peak_1954	chr20	52937123	52937773	194	29.8462	MACS_peak_1954	chr20	52937097	52937798	63.93	chr20-52936599-52937317	31.3837
chr20-52936935-52937317	chr20	52936935	52937317	GAAGGTATCCCTGCCAG	-0.311166	0.573753	MACS_peak_1954	chr20	52937123	52937773	194	29.8462	MACS_peak_1954	chr20	52937097	52937798	63.93	chr20-52936935-52937317	31.3837
chr20-53365999-53366738	chr20	53365999	53366738	GAGTGGCCACCTAACCC	-0.335854	0.517662	MACS_peak_1959	chr20	53365088	53366388	389	29.9231	MACS_peak_1959	chr20	53365044	53366431	65.2	chr20-53365999-53366738	31.1464
chr17-59827320-59828143	chr17	59827320	59828143	GGTGGCAGGGACTGAGG	-0.0348708	0.944878	MACS_peak_1341	chr17	59826452	59829202	823	29.9273	MACS_peak_1341	chr17	59826412	59829241	63.66	chr17-59827320-59828143	29.0916
chr5-180664229-180665097	chr5	180664229	180665097	GTTTCGCCAAAATCACA	0.409373	0.0673879	MACS_peak_2829	chr5	180664947	180665447	150	30	MACS_peak_2829	chr5	180665065	180665329	214.6	chr5-180664229-180665097	12.1212
chr5-131100160-131101064	chr5	131100160	131101064	AGTGGATTACGATGCGG	0.411085	0.117412	MACS_peak_2747	chr5	131100914	131101414	150	30	MACS_peak_2747	chr5	131100980	131101348	97.89	chr5-131100160-131101064	22.8261
chr3-64821989-64822529	chr3	64821989	64822529	AAACATTTGCTTGGGTA	-0.141236	0.819351	MACS_peak_2123	chr3	64821118	64822918	540	30	MACS_peak_2123	chr3	64821081	64822955	121.49	chr3-64821989-64822529	28.8154
chr17-55601659-55602388	chr17	55601659	55602388	GCGGGGGGGCCGTGGTC	-0.521509	0.156222	MACS_peak_1310	chr17	55601204	55601854	195	30	MACS_peak_1310	chr17	55601163	55601894	613.8	chr17-55601659-55602388	32.1477
chr12-50156291-50156849	chr12	50156291	50156849	CGGGTTTTTTCCGTCTC	-0.1503	0.795172	MACS_peak_642	chr12	50156639	50157339	210	30	MACS_peak_642	chr12	50156613	50157365	130.82	chr12-50156291-50156849	31.383
chr17-59698421-59699172	chr17	59698421	59699172	TGGTCAGGCCGACGCAA	-0.0323024	0.937793	MACS_peak_1334	chr17	59698351	59700851	751	30.04	MACS_peak_1334	chr17	59698322	59700879	82.32	chr17-59698421-59699172	29.3704
chr17-59698374-59699126	chr17	59698374	59699126	TTTTGGTAGAAGACTCT	-0.452028	0.110923	MACS_peak_1334	chr17	59698351	59700851	752	30.08	MACS_peak_1334	chr17	59698322	59700879	82.32	chr17-59698374-59699126	29.4095
chr20-53365996-53366615	chr20	53365996	53366615	TTATAGTCAGAGGGCCG	0.0949301	0.801327	MACS_peak_1959	chr20	53365088	53366388	392	30.1538	MACS_peak_1959	chr20	53365044	53366431	65.2	chr20-53365996-53366615	31.3627
chr17-59698945-59699699	chr17	59698945	59699699	GACATGGCGAGTTCTGA	0.0444397	0.9515	MACS_peak_1334	chr17	59698351	59700851	754	30.16	MACS_peak_1334	chr17	59698322	59700879	82.32	chr17-59698945-59699699	29.4877
chr17-59703160-59703929	chr17	59703160	59703929	TATGGTTGTCGACAATC	-0.848218	0.152617	MACS_peak_1335	chr17	59703280	59705430	649	30.186	MACS_peak_1335	chr17	59703249	59705461	147.58	chr17-59703160-59703929	30.7414
chr6-44652466-44653043	chr6	44652466	44653043	CGCAACTGATCTAGAGC	0.00586162	0.989136	MACS_peak_2896	chr6	44652892	44653392	151	30.2	MACS_peak_2896	chr6	44652886	44653397	428.98	chr6-44652466-44653043	30.7241
chr5-56158104-56158829	chr5	56158104	56158829	TGTTGCACACCATATAG	0.595838	0.0409061	MACS_peak_2593	chr5	56157755	56158255	151	30.2	MACS_peak_2593	chr5	56157874	56158136	63.36	chr5-56158104-56158829	12.2137
chr20-53396189-53396793	chr20	53396189	53396793	GTCCGTGCCCAAGCACA	0.375017	0.154828	MACS_peak_1960	chr20	53396079	53398079	604	30.2	MACS_peak_1960	chr20	53396048	53398110	79.03	chr20-53396189-53396793	29.2919
chr12-73280203-73280635	chr12	73280203	73280635	GAAGCGCATGGGGATTG	-0.0326973	0.943422	MACS_peak_706	chr12	73280484	73280984	151	30.2	MACS_peak_706	chr12	73280611	73280856	64.14	chr12-73280203-73280635	9.79592
chr17-59699766-59700524	chr17	59699766	59700524	GGGAGTCGACTTGGCTA	2.4405	1.79931e-13	MACS_peak_1334	chr17	59698351	59700851	758	30.32	MACS_peak_1334	chr17	59698322	59700879	82.32	chr17-59699766-59700524	29.6441
chr17-59703436-59704088	chr17	59703436	59704088	AGATTCGAAAGGTACCG	0.382624	0.208193	MACS_peak_1335	chr17	59703280	59705430	652	30.3256	MACS_peak_1335	chr17	59703249	59705461	147.58	chr17-59703436-59704088	29.4756
chr3-64822372-64823040	chr3	64822372	64823040	TGAGCCTGAGTGTGTGC	0.393833	0.24186	MACS_peak_2123	chr3	64821118	64822918	546	30.3333	MACS_peak_2123	chr3	64821081	64822955	121.49	chr3-64822372-64823040	31.1099
chr20-53396167-53396774	chr20	53396167	53396774	TTGAATTGCCAATGGTT	-0.0463593	0.93912	MACS_peak_1960	chr20	53396079	53398079	607	30.35	MACS_peak_1960	chr20	53396048	53398110	79.03	chr20-53396167-53396774	29.4374
chr17-59756649-59757241	chr17	59756649	59757241	CGGGCAGGAGCGTAGCA;TACAAGTGTTCTTTAGT	0.012209	0.999252	MACS_peak_1338	chr17	59755395	59757345	592	30.359	MACS_peak_1338	chr17	59755362	59757378	75.13	chr17-59756649-59757241	29.3651
chr3-63995250-63995953	chr3	63995250	63995953	CACCGCAAAGGCAGGCA	0.270838	0.331999	MACS_peak_2121	chr3	63995558	63996858	395	30.3846	MACS_peak_2121	chr3	63995518	63996897	66.06	chr3-63995250-63995953	31.5446
chr2-217527953-217528764	chr2	217527953	217528764	GTCAAGTTACATCACAT	0.374113	0.373774	MACS_peak_1865	chr2	217528612	217529112	152	30.4	MACS_peak_1865	chr2	217528665	217529058	84.88	chr2-217527953-217528764	25.1908
chr13-63621954-63622725	chr13	63621954	63622725	ATGAAAACACGAGCCGC	0.329989	0.558255	MACS_peak_855	chr13	63622573	63623073	152	30.4	MACS_peak_855	chr13	63622719	63622927	69.81	chr13-63621954-63622725	2.88462
chr1-43618724-43619212	chr1	43618724	43619212	GTTTACAGTGTAGGTGA;GATACATTCCGGGTCGT	-0.248629	0.241925	MACS_peak_47	chr1	43618376	43618876	152	30.4	MACS_peak_47	chr1	43618498	43618754	67.56	chr1-43618724-43619212	11.7188
chr3-195315495-195316198	chr3	195315495	195316198	TTCTTGGTAGTCCGCTG	-0.152308	0.734121	MACS_peak_498638	chr3	195315147	195315647	152	30.4	no_overlap	.	.	.	.	.	.
chr3-63996462-63997136	chr3	63996462	63997136	TGTCTCAAGTACTGTAG	0.0360846	0.938633	MACS_peak_2121	chr3	63995558	63996858	396	30.4615	MACS_peak_2121	chr3	63995518	63996897	66.06	chr3-63996462-63997136	31.5446
chr17-59755843-59756437	chr17	59755843	59756437	CCGTGGCGGTGGGTGGT	-0.106878	0.907356	MACS_peak_1338	chr17	59755395	59757345	594	30.4615	MACS_peak_1338	chr17	59755362	59757378	75.13	chr17-59755843-59756437	29.4643
chr17-59827399-59828239	chr17	59827399	59828239	TGGGTGGAGGGGGTGAG	-0.427448	0.13302	MACS_peak_1341	chr17	59826452	59829202	840	30.5455	MACS_peak_1341	chr17	59826412	59829241	63.66	chr17-59827399-59828239	29.6925
chr17-59698200-59699116	chr17	59698200	59699116	TTGAATTTCGCGAGCCC	0.901166	0.00128616	MACS_peak_1334	chr17	59698351	59700851	765	30.6	MACS_peak_1334	chr17	59698322	59700879	82.32	chr17-59698200-59699116	31.052
chr1-107364411-107364717	chr1	107364411	107364717	CGATAAGGGGGCGTTAG	-0.963439	0.0138819	MACS_peak_99	chr1	107363910	107364910	306	30.6	MACS_peak_99	chr1	107363877	107364942	66.63	chr1-107364411-107364717	28.7324
chr1-66488069-66488861	chr1	66488069	66488861	TCTACACCGAGACTGAG	0.0630574	0.888347	MACS_peak_72	chr1	66488708	66489208	153	30.6	no_overlap	.	.	.	.	.	.
chr2-2659167-2659511	chr2	2659167	2659511	GGTTGGAGAGAGGGTGG	-0.310628	0.709411	MACS_peak_1560	chr2	2658820	2659320	153	30.6	no_overlap	.	.	.	.	.	.
chr3-64821234-64821785	chr3	64821234	64821785	TGATGGGTAAAACGCTA	0.430659	0.310371	MACS_peak_2123	chr3	64821118	64822918	551	30.6111	MACS_peak_2123	chr3	64821081	64822955	121.49	chr3-64821234-64821785	29.4023
chr20-46621715-46622052	chr20	46621715	46622052	GTAACGTTTAGTCCGGA	2.37074	5.10345e-06	MACS_peak_1946	chr20	46621298	46622398	337	30.6364	MACS_peak_1946	chr20	46621272	46622423	730.37	chr20-46621715-46622052	29.2789
chr20-53365988-53366500	chr20	53365988	53366500	TTTTTTTATAGTCAGAG	-0.578761	0.12939	MACS_peak_1959	chr20	53365088	53366388	400	30.7692	MACS_peak_1959	chr20	53365044	53366431	65.2	chr20-53365988-53366500	31.9394
chr4-53579319-53579831	chr4	53579319	53579831	TGCCATAACTGTCAGTG	0.1947	0.568466	MACS_peak_2310	chr4	53579677	53580177	154	30.8	MACS_peak_2310	chr4	53579747	53580107	96.73	chr4-53579319-53579831	23.3333
chr1-216666974-216667447	chr1	216666974	216667447	CACGTAGAATAGTTCAA	-0.080024	0.842902	MACS_peak_266	chr1	216666628	216667128	154	30.8	MACS_peak_266	chr1	216666771	216666984	68.17	chr1-216666974-216667447	4.69484
chr1-145105839-145106544	chr1	145105839	145106544	CCGCGTCAGGGGAACTG	0.105928	0.854533	MACS_peak_127	chr1	145105493	145105993	154	30.8	MACS_peak_127	chr1	145105462	145106023	65.47	chr1-145105839-145106544	32.7986
chr3-64821008-64821674	chr3	64821008	64821674	AAAGGTCGGTCACACTC	0.581502	0.0515121	MACS_peak_2123	chr3	64821118	64822918	556	30.8889	MACS_peak_2123	chr3	64821081	64822955	121.49	chr3-64821008-64821674	31.6435
chr20-53365986-53366523	chr20	53365986	53366523	GTGGAGGCTCAAGCTTG	-0.180788	0.737224	MACS_peak_1959	chr20	53365088	53366388	402	30.9231	MACS_peak_1959	chr20	53365044	53366431	65.2	chr20-53365986-53366523	32.0836
chr20-53396437-53397056	chr20	53396437	53397056	TCGGTGGGCTCCCCTCG;CTGAGTGCGGAAGTGCG	0.0330882	0.960545	MACS_peak_1960	chr20	53396079	53398079	619	30.95	MACS_peak_1960	chr20	53396048	53398110	79.03	chr20-53396437-53397056	30.0194
chr3-108846547-108847314	chr3	108846547	108847314	TCCGCGATTATGGTACT	0.0224751	0.982275	MACS_peak_2177	chr3	108846202	108846702	155	31	MACS_peak_2177	chr3	108846348	108846555	64.41	chr3-108846547-108847314	3.86473
chr3-64822360-64822929	chr3	64822360	64822929	AAGTAAATATGTATGGT	-0.141849	0.659499	MACS_peak_2123	chr3	64821118	64822918	558	31	MACS_peak_2123	chr3	64821081	64822955	121.49	chr3-64822360-64822929	30.3629
chr20-53396093-53396713	chr20	53396093	53396713	AAATGGCCTAAGCCAAG	0.348282	0.264162	MACS_peak_1960	chr20	53396079	53398079	620	31	MACS_peak_1960	chr20	53396048	53398110	79.03	chr20-53396093-53396713	30.0679
chr20-53396353-53396973	chr20	53396353	53396973	GCGAGTTATGTCTTGGA	-0.0515364	0.898111	MACS_peak_1960	chr20	53396079	53398079	620	31	MACS_peak_1960	chr20	53396048	53398110	79.03	chr20-53396353-53396973	30.0679
chr20-53365985-53366587	chr20	53365985	53366587	CTCGTTGTTGAATCTCA;GAGGGTTGAACGCGGGC	-0.081291	0.974666	MACS_peak_1959	chr20	53365088	53366388	403	31	MACS_peak_1959	chr20	53365044	53366431	65.2	chr20-53365985-53366587	32.1557
chr1-200017173-200017702	chr1	200017173	200017702	GAGCGGGTGGGACAGAT	0.202106	0.57814	MACS_peak_240	chr1	200017547	200018047	155	31	MACS_peak_240	chr1	200017693	200017901	61.66	chr1-200017173-200017702	4.32692
chr17-59756651-59757256	chr17	59756651	59757256	CCCACAACGCAGTCGCG	-0.0187992	0.97967	MACS_peak_1338	chr17	59755395	59757345	605	31.0256	MACS_peak_1338	chr17	59755362	59757378	75.13	chr17-59756651-59757256	30.0099
chr17-59698938-59699714	chr17	59698938	59699714	TCCTAGATTTGGCAGAC	-0.200776	0.762865	MACS_peak_1334	chr17	59698351	59700851	776	31.04	MACS_peak_1334	chr17	59698322	59700879	82.32	chr17-59698938-59699714	30.3481
chr20-46621892-46622234	chr20	46621892	46622234	GGAGAATGAACTGTTTG	2.74922	3.72077e-08	MACS_peak_1946	chr20	46621298	46622398	342	31.0909	MACS_peak_1946	chr20	46621272	46622423	730.37	chr20-46621892-46622234	29.7133
chr20-53396514-53397136	chr20	53396514	53397136	GTACTCCTTTGCGATCT	0.370583	0.543296	MACS_peak_1960	chr20	53396079	53398079	622	31.1	MACS_peak_1960	chr20	53396048	53398110	79.03	chr20-53396514-53397136	30.1649
chr17-59361999-59362435	chr17	59361999	59362435	TACATTCGGGGGGACGT;GTACAGGTGGCGCAGGA	2.04266	5.71015e-10	MACS_peak_1330	chr17	59361548	59362948	436	31.1429	MACS_peak_1330	chr17	59361518	59362977	204.92	chr17-59361999-59362435	29.8835
chr17-59700072-59700887	chr17	59700072	59700887	CCGATGAGAATGCGTTC	0.748218	0.00985321	MACS_peak_1334	chr17	59698351	59700851	779	31.16	MACS_peak_1334	chr17	59698322	59700879	82.32	chr17-59700072-59700887	31.5604
chr17-59755883-59756491	chr17	59755883	59756491	GGCTAGAAGGTGGGGGG	0.0786388	0.925777	MACS_peak_1338	chr17	59755395	59757345	608	31.1795	MACS_peak_1338	chr17	59755362	59757378	75.13	chr17-59755883-59756491	30.1587
chr5-43934087-43934592	chr5	43934087	43934592	CGTTTAGGCCACGAGGT	0.313947	0.249949	MACS_peak_2551	chr5	43934436	43934936	156	31.2	MACS_peak_2551	chr5	43934480	43934892	61.18	chr5-43934087-43934592	27.1845
chr5-10528833-10529479	chr5	10528833	10529479	TTCTCCGTAGGCGAAGC	0.336002	0.321577	MACS_peak_2439	chr5	10528489	10528989	156	31.2	MACS_peak_2439	chr5	10528615	10528863	80.86	chr5-10528833-10529479	12.0968
chr3-152897-153053	chr3	152897	153053	ATCTTCCAATACGCTGT	3.54094	3.45793e-29	MACS_peak_2036	chr3	152715	153215	156	31.2	MACS_peak_2036	chr3	152680	153249	260.32	chr3-152897-153053	27.4165
chr11-78866574-78867211	chr11	78866574	78867211	AGCCGGCTGAGGGAATT	-0.423833	0.281551	MACS_peak_543	chr11	78867055	78867555	156	31.2	MACS_peak_543	chr11	78867164	78867445	60.99	chr11-78866574-78867211	16.726
chr1-220510129-220510598	chr1	220510129	220510598	CTGTGTAGCGCCTGGAT	0.0672107	0.9536	MACS_peak_274	chr1	220509785	220510285	156	31.2	MACS_peak_274	chr1	220509842	220510228	85.24	chr1-220510129-220510598	25.6477
chr10-90694484-90694993	chr10	90694484	90694993	CACATGGGGGTAAGGTG	0.203115	0.75681	MACS_peak_389	chr10	90694837	90695337	156	31.2	no_overlap	.	.	.	.	.	.
chr3-63995351-63995964	chr3	63995351	63995964	CACTTCGGACGGACCGT	0.394508	0.187149	MACS_peak_2121	chr3	63995558	63996858	406	31.2308	MACS_peak_2121	chr3	63995518	63996897	66.06	chr3-63995351-63995964	32.3423
chr20-53396088-53396713	chr20	53396088	53396713	GGATTGATAGGAGAAGG	0.124334	0.725251	MACS_peak_1960	chr20	53396079	53398079	625	31.25	MACS_peak_1960	chr20	53396048	53398110	79.03	chr20-53396088-53396713	30.3104
chr3-63995438-63995965	chr3	63995438	63995965	GGGCAAGTTCAGGGCAC;TGTGGGCGATACTTAGG	0.52446	0.00965815	MACS_peak_2121	chr3	63995558	63996858	407	31.3077	MACS_peak_2121	chr3	63995518	63996897	66.06	chr3-63995438-63995965	32.4148
chr17-59755431-59756042	chr17	59755431	59756042	TCCACTGCTCGTCTGTG	0.914637	0.00150073	MACS_peak_1338	chr17	59755395	59757345	611	31.3333	MACS_peak_1338	chr17	59755362	59757378	75.13	chr17-59755431-59756042	30.3075
chr16-20876646-20877135	chr16	20876646	20877135	GTAGGTGGTAACGGTCG	0.45534	0.168427	MACS_peak_1137	chr16	20876931	20877581	204	31.3846	MACS_peak_1137	chr16	20876888	20877623	472.4	chr16-20876646-20877135	33.6054
chr1-181068095-181068823	chr1	181068095	181068823	GGGACGCCCTGTGGGTG	-0.608134	0.339575	MACS_peak_184	chr1	181068666	181069166	157	31.4	MACS_peak_184	chr1	181068703	181069129	81.24	chr1-181068095-181068823	28.169
chr1-114878535-114879021	chr1	114878535	114879021	TGTGGGGGCCGCAGTGG	-0.03748	0.939743	MACS_peak_116	chr1	114878864	114879364	157	31.4	MACS_peak_116	chr1	114878869	114879358	78.08	chr1-114878535-114879021	31.0838
chr1-107436056-107436576	chr1	107436056	107436576	GGGGTCACGGCCGTAAG	-0.238581	0.547605	MACS_peak_101	chr1	107436340	107437090	236	31.4667	MACS_peak_101	chr1	107436293	107437137	96.04	chr1-107436056-107436576	33.5308
chr17-59699920-59700707	chr17	59699920	59700707	TACGTTCAGGAGCCGGT	0.121254	0.868585	MACS_peak_1334	chr17	59698351	59700851	787	31.48	MACS_peak_1334	chr17	59698322	59700879	82.32	chr17-59699920-59700707	30.7783
chr17-59756499-59757113	chr17	59756499	59757113	ATCTAACGAGGGTCGGG;GGAGCTTAGGGGTACTT	-0.217496	0.776337	MACS_peak_1338	chr17	59755395	59757345	614	31.4872	MACS_peak_1338	chr17	59755362	59757378	75.13	chr17-59756499-59757113	30.4563
chr3-64821619-64822186	chr3	64821619	64822186	GCTGGTTCGGCATCGAA	2.96642	8.54669e-11	MACS_peak_2123	chr3	64821118	64822918	567	31.5	MACS_peak_2123	chr3	64821081	64822955	121.49	chr3-64821619-64822186	30.2561
chr17-59362506-59363069	chr17	59362506	59363069	TGTGGGGCAGTGTGCTG	0.351088	0.401623	MACS_peak_1330	chr17	59361548	59362948	442	31.5714	MACS_peak_1330	chr17	59361518	59362977	204.92	chr17-59362506-59363069	32.2824
chr1-144010944-144011734	chr1	144010944	144011734	GGCCTGTGGCTATAAGT	-0.28708	0.436536	MACS_peak_125	chr1	144010465	144011165	221	31.5714	MACS_peak_125	chr1	144010426	144011203	496.63	chr1-144010944-144011734	33.3333
chr17-59704490-59705169	chr17	59704490	59705169	CTCATTGAAGGCAAAAG	0.257201	0.364925	MACS_peak_1335	chr17	59703280	59705430	679	31.5814	MACS_peak_1335	chr17	59703249	59705461	147.58	chr17-59704490-59705169	30.6962
chr6-122961711-122962347	chr6	122961711	122962347	GCGGGTTCTTGCGGGGG	-0.0335956	0.955177	MACS_peak_3034	chr6	122961369	122961869	158	31.6	MACS_peak_3034	chr6	122961437	122961800	120.31	chr6-122961711-122962347	24.5179
chr2-14427645-14428263	chr2	14427645	14428263	TCGTAGTGCGCGGGACG;AATTTTTGCTGGGTAGA	0.223462	0.868332	MACS_peak_1576	chr2	14428105	14428605	158	31.6	MACS_peak_1576	chr2	14428164	14428545	136.69	chr2-14427645-14428263	25.9843
chr1-114878284-114879022	chr1	114878284	114879022	TTCCGCGTGAGTGCCTT	-1.84502	2.49789e-05	MACS_peak_116	chr1	114878864	114879364	158	31.6	MACS_peak_116	chr1	114878869	114879358	78.08	chr1-114878284-114879022	31.2883
chr20-53365977-53366706	chr20	53365977	53366706	CGCTTGGACTGGAGTCA	0.920342	0.0623529	MACS_peak_1959	chr20	53365088	53366388	411	31.6154	MACS_peak_1959	chr20	53365044	53366431	65.2	chr20-53365977-53366706	32.7325
chr15-49918219-49918754	chr15	49918219	49918754	AGCCGACCACATCGAGG	0.382266	0.0997325	MACS_peak_1019	chr15	49917672	49918472	253	31.625	MACS_peak_1019	chr15	49917641	49918502	303.85	chr15-49918219-49918754	32.8688
chr17-59623556-59624019	chr17	59623556	59624019	GCGGGGGCAGGGGCAGA	0.0467481	0.922828	MACS_peak_1332	chr17	59623655	59624805	364	31.6522	MACS_peak_1332	chr17	59623628	59624831	95.3	chr17-59623556-59624019	32.5021
chr17-59698745-59699538	chr17	59698745	59699538	AGCTTTATAAATAAGGG	0.0518958	0.947447	MACS_peak_1334	chr17	59698351	59700851	793	31.72	MACS_peak_1334	chr17	59698322	59700879	82.32	chr17-59698745-59699538	31.0129
chr17-59756393-59757012	chr17	59756393	59757012	GGTGCGTCTTGAGGCTC	-0.219844	0.571683	MACS_peak_1338	chr17	59755395	59757345	619	31.7436	MACS_peak_1338	chr17	59755362	59757378	75.13	chr17-59756393-59757012	30.7044
chr12-106969207-106969731	chr12	106969207	106969731	AATGGTGAAGGCCCGGG;CAGGAGAATAGGACGGA	-0.291252	0.589317	MACS_peak_787	chr12	106968866	106969366	159	31.8	no_overlap	.	.	.	.	.	.
chr17-59703962-59704646	chr17	59703962	59704646	AGTCAGGTGTGCATACG	-0.169177	0.774713	MACS_peak_1335	chr17	59703280	59705430	684	31.814	MACS_peak_1335	chr17	59703249	59705461	147.58	chr17-59703962-59704646	30.9222
chr17-59827876-59828751	chr17	59827876	59828751	TCTCATGGGGGACTAAG	-0.367521	0.354447	MACS_peak_1341	chr17	59826452	59829202	875	31.8182	MACS_peak_1341	chr17	59826412	59829241	63.66	chr17-59827876-59828751	30.9297
chr15-52956109-52956619	chr15	52956109	52956619	CATGGGGAAGGTATATA	-0.448797	0.0332599	MACS_peak_1031	chr15	52955666	52956316	207	31.8462	MACS_peak_1031	chr15	52955639	52956342	193.94	chr15-52956109-52956619	33.1437
chr20-53059197-53060217	chr20	53059197	53060217	GGTCGGTGATTTGGTCG	0.223585	0.636342	MACS_peak_1956	chr20	53057263	53060463	1020	31.875	MACS_peak_1956	chr20	53057217	53060508	138.64	chr20-53059197-53060217	30.9936
chr17-59703412-59704098	chr17	59703412	59704098	GTGAGCGTCGCCTATAA	-0.841806	0.135374	MACS_peak_1335	chr17	59703280	59705430	686	31.907	MACS_peak_1335	chr17	59703249	59705461	147.58	chr17-59703412-59704098	31.0127
chr3-64821223-64821799	chr3	64821223	64821799	GGCACGGTTATGTTAGG	0.0966585	0.77026	MACS_peak_2123	chr3	64821118	64822918	576	32	MACS_peak_2123	chr3	64821081	64822955	121.49	chr3-64821223-64821799	30.7364
chr17-59828040-59828920	chr17	59828040	59828920	GTTGATCTTAGGGTGTC	-0.334736	0.231629	MACS_peak_1341	chr17	59826452	59829202	880	32	MACS_peak_1341	chr17	59826412	59829241	63.66	chr17-59828040-59828920	31.1064
chr14-25301120-25301635	chr14	25301120	25301635	GTTAACGTGAATTGCGG	0.098519	0.804926	MACS_peak_874	chr14	25301475	25301975	160	32	MACS_peak_874	chr14	25301607	25301842	65.63	chr14-25301120-25301635	11.9149
chr17-59828123-59829005	chr17	59828123	59829005	CCGCGGGGGTATAGAGC	0.142431	0.773253	MACS_peak_1341	chr17	59826452	59829202	882	32.0727	MACS_peak_1341	chr17	59826412	59829241	63.66	chr17-59828123-59829005	31.1771
chr20-53396701-53397343	chr20	53396701	53397343	AACAAAGAGCGGCAAGG	0.0925272	0.82387	MACS_peak_1960	chr20	53396079	53398079	642	32.1	MACS_peak_1960	chr20	53396048	53398110	79.03	chr20-53396701-53397343	31.1348
chr17-59827485-59828368	chr17	59827485	59828368	CCGGCGTCTGCCTCGAA	0.162159	0.695626	MACS_peak_1341	chr17	59826452	59829202	883	32.1091	MACS_peak_1341	chr17	59826412	59829241	63.66	chr17-59827485-59828368	31.2124
chr5-41122438-41122711	chr5	41122438	41122711	TTGGGCGCAGGAAGATG	-1.28279	0.0160742	MACS_peak_2497	chr5	41122430	41123280	273	32.1176	MACS_peak_2497	chr5	41122392	41123318	355.25	chr5-41122438-41122711	29.4816
chr15-49918215-49918759	chr15	49918215	49918759	CATAGACTTGACCCCGG	0.05915	0.8843	MACS_peak_1019	chr15	49917672	49918472	257	32.125	MACS_peak_1019	chr15	49917641	49918502	303.85	chr15-49918215-49918759	33.3333
chr20-53365970-53366466	chr20	53365970	53366466	TGACTGGGGCGTGCCGG;TGAACATATGTGATAGG	-0.134484	0.381327	MACS_peak_1959	chr20	53365088	53366388	418	32.1538	MACS_peak_1959	chr20	53365044	53366431	65.2	chr20-53365970-53366466	33.2372
chr17-59703339-59704031	chr17	59703339	59704031	GCGTCGTGACTTGCTGG	-1.24699	0.00886706	MACS_peak_1335	chr17	59703280	59705430	692	32.186	MACS_peak_1335	chr17	59703249	59705461	147.58	chr17-59703339-59704031	31.2839
chr10-91635798-91636564	chr10	91635798	91636564	GTGGAAGGTCGAGGCCG	0.382786	0.428188	MACS_peak_391	chr10	91635459	91635959	161	32.2	MACS_peak_391	chr10	91635590	91635828	65.18	chr10-91635798-91636564	12.605
chr1-10804335-10804788	chr1	10804335	10804788	GAAAAGGGAGGCTGGCC	3.7103	7.09792e-15	MACS_peak_16	chr1	10804627	10805127	161	32.2	MACS_peak_16	chr1	10804745	10805009	70.34	chr1-10804335-10804788	16.2879
chr7-12597374-12598163	chr7	12597374	12598163	CACCATGGCGTCAACAC;GCAACTAGTTTGGTCGA	0.135719	0.776188	MACS_peak_3098	chr7	12596934	12597584	210	32.3077	MACS_peak_3098	chr7	12596896	12597621	312.19	chr7-12597374-12598163	34.069
chr20-53365968-53366567	chr20	53365968	53366567	GATACTTTGAGCCTTAA	-0.175825	0.594614	MACS_peak_1959	chr20	53365088	53366388	420	32.3077	MACS_peak_1959	chr20	53365044	53366431	65.2	chr20-53365968-53366567	33.3814
chr20-53365968-53366594	chr20	53365968	53366594	ACTAGTGGGTAGCTGGG	-0.275396	0.665366	MACS_peak_1959	chr20	53365088	53366388	420	32.3077	MACS_peak_1959	chr20	53365044	53366431	65.2	chr20-53365968-53366594	33.3814
chr5-110830563-110831208	chr5	110830563	110831208	CCGGAGGGGCGGCAGAG	-0.156145	0.862718	MACS_peak_2700	chr5	110830056	110830806	243	32.4	MACS_peak_2700	chr5	110830010	110830852	962.3	chr5-110830563-110831208	34.323
chr10-109798856-109799588	chr10	109798856	109799588	GTTGGTGTGAGACCAGA;GCGGCGAGTGGGGGGGA	0.0845866	0.730419	MACS_peak_409	chr10	109799426	109799926	162	32.4	MACS_peak_409	chr10	109799523	109799829	167.85	chr10-109798856-109799588	21.2418
chr1-83477265-83478103	chr1	83477265	83478103	CACCGCTCCGAAGGGTG;GCGTGGTGGACGCGGGG	-0.176012	0.849351	MACS_peak_82	chr1	83476927	83477427	162	32.4	MACS_peak_82	chr1	83477054	83477299	60.71	chr1-83477265-83478103	13.8776
chr2-164882277-164882906	chr2	164882277	164882906	GTAGCCGGGGGGTTTCA	-0.294171	0.371008	MACS_peak_1765	chr2	164882744	164883244	162	32.4	no_overlap	.	.	.	.	.	.
chr20-53396229-53396878	chr20	53396229	53396878	GGACGGAAATGAAGGCT	-0.0510429	0.943515	MACS_peak_1960	chr20	53396079	53398079	649	32.45	MACS_peak_1960	chr20	53396048	53398110	79.03	chr20-53396229-53396878	31.4743
chr3-63995453-63995981	chr3	63995453	63995981	AGGAGTTTCATGACGGT	-0.296785	0.602966	MACS_peak_2121	chr3	63995558	63996858	423	32.5385	MACS_peak_2121	chr3	63995518	63996897	66.06	chr3-63995453-63995981	33.5751
chr20-53365965-53366628	chr20	53365965	53366628	ATATCAATAGGGAGCTG	0.125432	0.864402	MACS_peak_1959	chr20	53365088	53366388	423	32.5385	MACS_peak_1959	chr20	53365044	53366431	65.2	chr20-53365965-53366628	33.5977
chr7-33327040-33327542	chr7	33327040	33327542	CGGGAGGTTACGAGTTC	0.646369	0.00149086	MACS_peak_3121	chr7	33327314	33328014	228	32.5714	MACS_peak_3121	chr7	33327288	33328039	609.56	chr7-33327040-33327542	33.8216
chr7-26236245-26236495	chr7	26236245	26236495	AGCAACCGTGGGGAGGC	-0.0274242	0.976779	MACS_peak_3112	chr7	26236332	26236832	163	32.6	MACS_peak_3111	chr7	26235984	26236319	183.42	chr7-26236245-26236495	22.0896
chr5-41102321-41102778	chr5	41102321	41102778	GGTTGTCCTGGATAGGG	-0.0159292	0.97967	MACS_peak_2495	chr5	41101984	41102484	163	32.6	MACS_peak_2495	chr5	41102121	41102346	65.44	chr5-41102321-41102778	11.1111
chr12-85612749-85613261	chr12	85612749	85613261	GAGCGGTCACTGAGGTT	0.296443	0.303445	MACS_peak_747	chr12	85613098	85613598	163	32.6	MACS_peak_747	chr12	85613227	85613469	64.58	chr12-85612749-85613261	14.0496
chr20-53396284-53396937	chr20	53396284	53396937	ATGGGTAGCAAAGGGTG	-0.292576	0.208599	MACS_peak_1960	chr20	53396079	53398079	653	32.65	MACS_peak_1960	chr20	53396048	53398110	79.03	chr20-53396284-53396937	31.6683
chr2-47198299-47198783	chr2	47198299	47198783	GCCGACTGGCCAGCCCG	-0.0956748	0.864186	MACS_peak_1629	chr2	47197963	47198463	164	32.8	MACS_peak_1629	chr2	47198025	47198401	97.09	chr2-47198299-47198783	27.1277
chr17-59699244-59700064	chr17	59699244	59700064	GCGGGGTGGGGGCCGGG	1.16429	0.0001197	MACS_peak_1334	chr17	59698351	59700851	820	32.8	MACS_peak_1334	chr17	59698322	59700879	82.32	chr17-59699244-59700064	32.0688
chr17-45266673-45267053	chr17	45266673	45267053	TTCGCCCATTATGCACA	0.562378	0.247586	MACS_peak_1284	chr17	45266337	45266837	164	32.8	MACS_peak_1284	chr17	45266479	45266694	76.98	chr17-45266673-45267053	9.76744
chr1-114878380-114879028	chr1	114878380	114879028	TCGCTTGGGGCAGGGTG	-0.771555	0.0075479	MACS_peak_116	chr1	114878864	114879364	164	32.8	MACS_peak_116	chr1	114878869	114879358	78.08	chr1-114878380-114879028	32.5153
chr1-8927350-8927820	chr1	8927350	8927820	GCGTGTACCAAATGGAA;TGATATGATTTAGTAAT	-1.05712	0.00752956	MACS_peak_12	chr1	8927014	8927514	164	32.8	no_overlap	.	.	.	.	.	.
chr13-47371603-47372625	chr13	47371603	47372625	TAAGAATGTGTCCACTG	0.0170306	0.984112	ESD	chr13	47371267	47371767	164	32.8	no_overlap	.	.	.	.	.	.
chr3-64821787-64822378	chr3	64821787	64822378	AGAACGGGCGGCGGGAT	3.74683	4.35384e-25	MACS_peak_2123	chr3	64821118	64822918	591	32.8333	MACS_peak_2123	chr3	64821081	64822955	121.49	chr3-64821787-64822378	31.5368
chr17-59362488-59363007	chr17	59362488	59363007	TTCGTCGTCATGCTTTG	0.288208	0.568647	MACS_peak_1330	chr17	59361548	59362948	460	32.8571	MACS_peak_1330	chr17	59361518	59362977	204.92	chr17-59362488-59363007	33.5161
chr9-84635942-84636259	chr9	84635942	84636259	GGGGTATTACGATCTGG	-0.0485622	0.908139	MACS_peak_3476	chr9	84636045	84636695	214	32.9231	MACS_peak_3476	chr9	84636009	84636730	424.69	chr9-84635942-84636259	34.6741
chr20-53365858-53366286	chr20	53365858	53366286	TAGAGGCCCGTGCGAGG	-0.63797	0.277078	MACS_peak_1959	chr20	53365088	53366388	428	32.9231	MACS_peak_1959	chr20	53365044	53366431	65.2	chr20-53365858-53366286	30.858
chr5-61576162-61576785	chr5	61576162	61576785	GGTGGACATGGTGTCTA;TGAAGGCACGATTAGTT	-0.988269	0.00618996	MACS_peak_2600	chr5	61575827	61576327	165	33	MACS_peak_2600	chr5	61575786	61576368	260.03	chr5-61576162-61576785	35.3952
chr20-53365959-53366408	chr20	53365959	53366408	GGACAAAGCACGCCGTA	-0.739242	0.043724	MACS_peak_1959	chr20	53365088	53366388	429	33	MACS_peak_1959	chr20	53365044	53366431	65.2	chr20-53365959-53366408	32.372
chr11-81790787-81791918	chr11	81790787	81791918	GTATTTTTTTTGGTAGT	-0.465077	0.0384748	MACS_peak_554	chr11	81790452	81790952	165	33	MACS_peak_554	chr11	81790584	81790820	63.24	chr11-81790787-81791918	13.9831
chr17-59699871-59700697	chr17	59699871	59700697	CAGTCATGTGTTCTAGC	4.29957	1.65107e-26	MACS_peak_1334	chr17	59698351	59700851	826	33.04	MACS_peak_1334	chr17	59698322	59700879	82.32	chr17-59699871-59700697	32.3035
chr3-63995382-63995988	chr3	63995382	63995988	TGAATTGCACGCAGGGT;GTGGAGACCATGAGGTT	0.0397476	0.454161	MACS_peak_2121	chr3	63995558	63996858	430	33.0769	MACS_peak_2121	chr3	63995518	63996897	66.06	chr3-63995382-63995988	34.0827
chr20-52937558-52938137	chr20	52937558	52938137	TCAAGACCTGCGAAGGG	0.415288	0.402197	MACS_peak_1954	chr20	52937123	52937773	215	33.0769	MACS_peak_1954	chr20	52937097	52937798	63.93	chr20-52937558-52938137	34.2368
chr20-52937558-52938575	chr20	52937558	52938575	GGACGTCGTAATCGCAT	0.176998	0.634615	MACS_peak_1954	chr20	52937123	52937773	215	33.0769	MACS_peak_1954	chr20	52937097	52937798	63.93	chr20-52937558-52938575	34.2368
chr20-46622034-46622610	chr20	46622034	46622610	TCAGGAGAAGGTGTAAG	-0.223519	0.670243	MACS_peak_1946	chr20	46621298	46622398	364	33.0909	MACS_peak_1946	chr20	46621272	46622423	730.37	chr20-46622034-46622610	33.7967
chr3-64821879-64822476	chr3	64821879	64822476	ATAGGGGCCCCAGCTGG	3.24725	2.24989e-20	MACS_peak_2123	chr3	64821118	64822918	597	33.1667	MACS_peak_2123	chr3	64821081	64822955	121.49	chr3-64821879-64822476	31.857
chr7-40882662-40883409	chr7	40882662	40883409	CTAGGTATCGGATAGGG	-0.267359	0.665501	MACS_peak_3126	chr7	40883243	40883743	166	33.2	MACS_peak_3126	chr7	40883308	40883677	79.37	chr7-40882662-40883409	27.3713
chr4-78801261-78801951	chr4	78801261	78801951	GCGGGAGAGGCAAGGTT	-0.278423	0.497932	MACS_peak_2336	chr4	78801785	78802285	166	33.2	MACS_peak_2336	chr4	78801842	78802228	116.38	chr4-78801261-78801951	28.2383
chr2-151150538-151151257	chr2	151150538	151151257	GTGTCGTTGGAGAATTG	-0.718988	0.00111108	MACS_peak_1746	chr2	151150204	151150704	166	33.2	MACS_peak_1746	chr2	151150275	151150633	71.2	chr2-151150538-151151257	26.5363
chr12-111158690-111159319	chr12	111158690	111159319	AAGGCGGTGTAATTTTG	-0.00429856	0.994619	MACS_peak_793	chr12	111158356	111158856	166	33.2	MACS_peak_793	chr12	111158485	111158727	64.58	chr12-111158690-111159319	15.2893
chr9-42597334-42598127	chr9	42597334	42598127	TTGGGGTGTGCGTTGGG	-0.0918394	0.799649	neg_region_19	chr9	42597000	42597500	166	33.2	no_overlap	.	.	.	.	.	.
chr3-64821413-64822011	chr3	64821413	64822011	GAAGTTAATAGAGGATT	3.56353	1.56872e-17	MACS_peak_2123	chr3	64821118	64822918	598	33.2222	MACS_peak_2123	chr3	64821081	64822955	121.49	chr3-64821413-64822011	31.9104
chr3-64822319-64822922	chr3	64822319	64822922	AGATTCGTGGGGAGGGG	-0.0268037	0.964635	MACS_peak_2123	chr3	64821118	64822918	599	33.2778	MACS_peak_2123	chr3	64821081	64822955	121.49	chr3-64822319-64822922	32.1772
chr17-59702990-59703996	chr17	59702990	59703996	TGTATGTTTCGACCCCT	-1.11915	0.0359406	MACS_peak_1335	chr17	59703280	59705430	716	33.3023	MACS_peak_1335	chr17	59703249	59705461	147.58	chr17-59702990-59703996	33.7703
chr17-59827305-59828223	chr17	59827305	59828223	CCCGTGCCGGCAGAAGC	-0.206541	0.437268	MACS_peak_1341	chr17	59826452	59829202	918	33.3818	MACS_peak_1341	chr17	59826412	59829241	63.66	chr17-59827305-59828223	32.4496
chr15-52955397-52955883	chr15	52955397	52955883	AGCCCGCTGCTAGTGCG	0.202593	0.627782	MACS_peak_1031	chr15	52955666	52956316	217	33.3846	MACS_peak_1031	chr15	52955639	52956342	193.94	chr15-52955397-52955883	34.7084
chr7-40882692-40883410	chr7	40882692	40883410	GAGGAGGAATATCGGGA;GGGCGATAATGTGTTTT	-0.723538	2.29257e-09	MACS_peak_3126	chr7	40883243	40883743	167	33.4	MACS_peak_3126	chr7	40883308	40883677	79.37	chr7-40882692-40883410	27.6423
chr5-151387282-151388085	chr5	151387282	151388085	CCGTAGCCAGTGAGTCT;GGTGGGACGCGGGGAGA	0.138486	0.496371	MACS_peak_2779	chr5	151386949	151387449	167	33.4	MACS_peak_2779	chr5	151387064	151387333	60.82	chr5-151387282-151388085	18.9591
chr3-78428377-78428884	chr3	78428377	78428884	GTCCCGTTAGGGGGGGG	-0.221222	0.566044	MACS_peak_2137	chr3	78428717	78429217	167	33.4	MACS_peak_2137	chr3	78428875	78429058	63.27	chr3-78428377-78428884	4.91803
chr4-100935380-100935959	chr4	100935380	100935959	CGCGTGGTTGGGACGCA	-0.158261	0.715509	MACS_peak_2357	chr4	100935792	100936292	167	33.4	no_overlap	.	.	.	.	.	.
chr17-59756661-59757314	chr17	59756661	59757314	CGGAAGGGGCGCGCGAT	-0.521344	0.430927	MACS_peak_1338	chr17	59755395	59757345	653	33.4872	MACS_peak_1338	chr17	59755362	59757378	75.13	chr17-59756661-59757314	32.3909
chr14-67399676-67400329	chr14	67399676	67400329	CAGCGGACCCTGGGATC	-0.00750078	0.985808	MACS_peak_931	chr14	67399244	67399894	218	33.5385	MACS_peak_931	chr14	67399212	67399925	305.76	chr14-67399676-67400329	34.9229
chr8-113780982-113781487	chr8	113780982	113781487	GAGGCTTAACAGCACTG	-0.288759	0.665378	MACS_peak_3377	chr8	113780650	113781150	168	33.6	MACS_peak_3377	chr8	113780767	113781033	60.56	chr8-113780982-113781487	19.1729
chr20-53395993-53396751	chr20	53395993	53396751	GCCTGTGTTGTGCAGGG	0.0696504	0.9515	MACS_peak_1960	chr20	53396079	53398079	672	33.6	MACS_peak_1960	chr20	53396048	53398110	79.03	chr20-53395993-53396751	34.0931
chr16-32718382-32718912	chr16	32718382	32718912	TTTCAAATGTGGTGGGC	-0.0804558	0.9292	neg_region_20	chr16	32718050	32718550	168	33.6	no_overlap	.	.	.	.	.	.
chr20-53365951-53366604	chr20	53365951	53366604	GTATTTTTGCGTAGAGG	-0.21083	0.647466	MACS_peak_1959	chr20	53365088	53366388	437	33.6154	MACS_peak_1959	chr20	53365044	53366431	65.2	chr20-53365951-53366604	34.6071
chr9-110499741-110500502	chr9	110499741	110500502	TGGTGGAGGGGGTCGAG	-0.298904	0.712505	MACS_peak_3519	chr9	110500317	110500867	185	33.6364	MACS_peak_3519	chr9	110500280	110500903	208.91	chr9-110499741-110500502	35.634
chr20-46293783-46294272	chr20	46293783	46294272	GTCCGGGTTGGCCGGGG	3.33256	1.61396e-13	MACS_peak_1944	chr20	46293278	46294728	489	33.7241	MACS_peak_1944	chr20	46293241	46294765	76.16	chr20-46293783-46294272	32.0866
chr17-59755478-59756136	chr17	59755478	59756136	TTACCTTCTACCGGACA	-0.241456	0.721969	MACS_peak_1338	chr17	59755395	59757345	658	33.7436	MACS_peak_1338	chr17	59755362	59757378	75.13	chr17-59755478-59756136	32.6389
chr20-53396477-53397152	chr20	53396477	53397152	GATAGTTCGGCATCCGT	0.272351	0.642243	MACS_peak_1960	chr20	53396079	53398079	675	33.75	MACS_peak_1960	chr20	53396048	53398110	79.03	chr20-53396477-53397152	32.7352
chr17-59703434-59704160	chr17	59703434	59704160	GATAGTTAGTGAAAGTG	-0.455241	0.105911	MACS_peak_1335	chr17	59703280	59705430	726	33.7674	MACS_peak_1335	chr17	59703249	59705461	147.58	chr17-59703434-59704160	32.821
chr17-59703446-59704172	chr17	59703446	59704172	GACGGCCAAAGACGGTA	-0.0923694	0.823296	MACS_peak_1335	chr17	59703280	59705430	726	33.7674	MACS_peak_1335	chr17	59703249	59705461	147.58	chr17-59703446-59704172	32.821
chr17-59361938-59362411	chr17	59361938	59362411	TTATCTGGTTACTCTGG	1.46561	0.00488814	MACS_peak_1330	chr17	59361548	59362948	473	33.7857	MACS_peak_1330	chr17	59361518	59362977	204.92	chr17-59361938-59362411	32.4195
chr12-111158687-111159319	chr12	111158687	111159319	GGAGTACACGGGGTCGG	0.246319	0.587411	MACS_peak_793	chr12	111158356	111158856	169	33.8	MACS_peak_793	chr12	111158485	111158727	64.58	chr12-111158687-111159319	16.5289
chr16-81068668-81069227	chr16	81068668	81069227	TATTGTGCGTACTGAAC	-0.396076	0.482535	ATMIN	chr16	81069058	81069558	169	33.8	no_overlap	.	.	.	.	.	.
chr20-52936663-52937343	chr20	52936663	52937343	GGCGTAACTACTCGTGG;TTCACTGGGCAAGGAAG	0.144423	0.879304	MACS_peak_1954	chr20	52937123	52937773	220	33.8462	MACS_peak_1954	chr20	52937097	52937798	63.93	chr20-52936663-52937343	35.0927
chr17-59698956-59699803	chr17	59698956	59699803	GAGGCGGCGGGGGTGGG	-0.210935	0.603438	MACS_peak_1334	chr17	59698351	59700851	847	33.88	MACS_peak_1334	chr17	59698322	59700879	82.32	chr17-59698956-59699803	33.1248
chr3-64821711-64822322	chr3	64821711	64822322	TGGATTGGTAGTTTGAT;CAGTTTTAGTAGTGTCG	3.56028	1.59412e-55	MACS_peak_2123	chr3	64821118	64822918	611	33.9444	MACS_peak_2123	chr3	64821081	64822955	121.49	chr3-64821711-64822322	32.6041
chr5-118659050-118659618	chr5	118659050	118659618	CTTCTCTCAGGGAGGGC;TGAGTGTTGGTACACGA	3.21111	9.8769e-34	MACS_peak_2721	chr5	118659448	118659948	170	34	MACS_peak_2720	chr5	118659290	118659540	50.02	chr5-118659050-118659618	100
chr20-53396481-53397161	chr20	53396481	53397161	GTAGCTGTGGGGGCGTG	0.105535	0.89604	MACS_peak_1960	chr20	53396079	53398079	680	34	MACS_peak_1960	chr20	53396048	53398110	79.03	chr20-53396481-53397161	32.9777
chr20-53396101-53396781	chr20	53396101	53396781	GCGATCGCGAGGTGCGG	-0.09897	0.858564	MACS_peak_1960	chr20	53396079	53398079	680	34	MACS_peak_1960	chr20	53396048	53398110	79.03	chr20-53396101-53396781	32.9777
chr9-45981379-45981820	chr9	45981379	45981820	TCGAAGAGCCGCAGCGT	0.0231483	0.969174	neg_region_47	chr9	45981650	45982150	170	34	no_overlap	.	.	.	.	.	.
chr17-59755544-59756208	chr17	59755544	59756208	ACGGAAGGAGTGTTTGC	0.604303	0.103033	MACS_peak_1338	chr17	59755395	59757345	664	34.0513	MACS_peak_1338	chr17	59755362	59757378	75.13	chr17-59755544-59756208	32.9365
chr17-59361944-59362421	chr17	59361944	59362421	GGTGGATCAGAGGAGGC	2.59105	3.34569e-11	MACS_peak_1330	chr17	59361548	59362948	477	34.0714	MACS_peak_1330	chr17	59361518	59362977	204.92	chr17-59361944-59362421	32.6936
chr8-107620981-107621471	chr8	107620981	107621471	CAATGAGCTCATGATGA	0.408957	0.238609	MACS_peak_3351	chr8	107620586	107621186	205	34.1667	MACS_peak_3351	chr8	107620553	107621219	206.79	chr8-107620981-107621471	35.7357
chr3-64821797-64822412	chr3	64821797	64822412	TATGTGCCGTTGGGGTG	3.41852	6.89484e-22	MACS_peak_2123	chr3	64821118	64822918	615	34.1667	MACS_peak_2123	chr3	64821081	64822955	121.49	chr3-64821797-64822412	32.8175
chr20-46621694-46622070	chr20	46621694	46622070	TGGCGCTGGGGGAATAT	1.98862	0.000362269	MACS_peak_1946	chr20	46621298	46622398	376	34.1818	MACS_peak_1946	chr20	46621272	46622423	730.37	chr20-46621694-46622070	32.6672
chr5-149826512-149827320	chr5	149826512	149827320	CCTTGGCGCTGGCCGAT	-0.0516828	0.938552	MACS_peak_2776	chr5	149826183	149826683	171	34.2	MACS_peak_2776	chr5	149826299	149826566	139.88	chr5-149826512-149827320	20.2247
chr11-118622306-118622974	chr11	118622306	118622974	TTACTCGGATGTGTCAG;AGCCATCGGTGAGTCGG	-0.989143	0.00882506	MACS_peak_584	chr11	118621977	118622477	171	34.2	MACS_peak_584	chr11	118622085	118622368	63.7	chr11-118622306-118622974	21.9081
chr7-2192279-2192811	chr7	2192279	2192811	TATTAAGGGGAGGAATT;ACTGTCTGAGGGATATT	-0.131271	0.850893	MACS_peak_3082	chr7	2191950	2192450	171	34.2	no_overlap	.	.	.	.	.	.
chr17-59827822-59828763	chr17	59827822	59828763	GGACCCAAACGCCTACG	-0.184666	0.668307	MACS_peak_1341	chr17	59826452	59829202	941	34.2182	MACS_peak_1341	chr17	59826412	59829241	63.66	chr17-59827822-59828763	33.2626
chr17-59361668-59362148	chr17	59361668	59362148	GGCTTTCAGTGTGGCTG	-0.799892	0.128676	MACS_peak_1330	chr17	59361548	59362948	480	34.2857	MACS_peak_1330	chr17	59361518	59362977	204.92	chr17-59361668-59362148	32.8992
chr10-24577975-24578523	chr10	24577975	24578523	TGAAGCGGGGGGGTCCG	-0.00518145	0.992181	MACS_peak_333	chr10	24577581	24578181	206	34.3333	MACS_peak_333	chr10	24577539	24578223	332.15	chr10-24577975-24578523	36.2573
chr17-59704582-59705321	chr17	59704582	59705321	CCAGGGGGAGGGGAGGG	-0.162496	0.664013	MACS_peak_1335	chr17	59703280	59705430	739	34.3721	MACS_peak_1335	chr17	59703249	59705461	147.58	chr17-59704582-59705321	33.4087
chrX-107366178-107366723	chrX	107366178	107366723	CGCCCCGGGAGCGACTG	3.83353	2.00009e-24	MACS_peak_3608	chrX	107365850	107366350	172	34.4	MACS_peak_3608	chrX	107365815	107366385	194.06	chrX-107366178-107366723	36.3158
chr5-164777661-164778493	chr5	164777661	164778493	CTTACTTGGATTGTGAC	-0.482925	0.204418	MACS_peak_2805	chr5	164777333	164777833	172	34.4	MACS_peak_2805	chr5	164777462	164777703	64.73	chr5-164777661-164778493	17.4274
chr5-46160170-46160753	chr5	46160170	46160753	TATAGCATACCCGTTGG	-0.128127	0.882263	MACS_peak_2579	chr5	46160581	46161081	172	34.4	MACS_peak_2579	chr5	46160708	46160954	64	chr5-46160170-46160753	18.2927
chr12-53485748-53486307	chr12	53485748	53486307	CTGCGTGTGCTAGAGAG	-0.562387	0.0380097	MACS_peak_652	chr12	53485420	53485920	172	34.4	MACS_peak_652	chr12	53485523	53485816	60.34	chr12-53485748-53486307	23.2082
chr20-53396749-53397438	chr20	53396749	53397438	GGCTGTTCGCTGTGTTG	-0.0145906	0.983672	MACS_peak_1960	chr20	53396079	53398079	689	34.45	MACS_peak_1960	chr20	53396048	53398110	79.03	chr20-53396749-53397438	33.4142
chr20-53365940-53366662	chr20	53365940	53366662	GTTGAATCAGTTTCCAC	-0.366253	0.638236	MACS_peak_1959	chr20	53365088	53366388	448	34.4615	MACS_peak_1959	chr20	53365044	53366431	65.2	chr20-53365940-53366662	35.4001
chr17-59361668-59362151	chr17	59361668	59362151	GCCGGAGGTAGGTGCGG	-0.664131	0.300842	MACS_peak_1330	chr17	59361548	59362948	483	34.5	MACS_peak_1330	chr17	59361518	59362977	204.92	chr17-59361668-59362151	33.1049
chr3-64821844-64822466	chr3	64821844	64822466	AGGTCGTAGTCCGCTGT	4.03571	1.745e-31	MACS_peak_2123	chr3	64821118	64822918	622	34.5556	MACS_peak_2123	chr3	64821081	64822955	121.49	chr3-64821844-64822466	33.191
chr20-53396364-53397056	chr20	53396364	53397056	TTAATGTGTCGGAGTCA;TAACTGCACATCATCAC	-0.0434967	0.772175	MACS_peak_1960	chr20	53396079	53398079	692	34.6	MACS_peak_1960	chr20	53396048	53398110	79.03	chr20-53396364-53397056	33.5597
chr2-84127284-84128202	chr2	84127284	84128202	GTACGAGCCCGCGTAGT	0.254322	0.60987	MACS_peak_1674	chr2	84126957	84127457	173	34.6	MACS_peak_1674	chr2	84127109	84127305	61.07	chr2-84127284-84128202	10.7143
chr1-200017072-200017720	chr1	200017072	200017720	ACCCATCATCCTGGCCA	-0.0724617	0.885877	MACS_peak_240	chr1	200017547	200018047	173	34.6	MACS_peak_240	chr1	200017693	200017901	61.66	chr1-200017072-200017720	12.9808
chr17-59755876-59756551	chr17	59755876	59756551	TGAGCCTTGGTGGAAGG	-1.68945	3.39722e-20	MACS_peak_1338	chr17	59755395	59757345	675	34.6154	MACS_peak_1338	chr17	59755362	59757378	75.13	chr17-59755876-59756551	33.4821
chr20-53365937-53366576	chr20	53365937	53366576	CAGGGAACTTCCGTTGT;GACGTGGAGTCTGGGAG	-0.271579	0.589019	MACS_peak_1959	chr20	53365088	53366388	451	34.6923	MACS_peak_1959	chr20	53365044	53366431	65.2	chr20-53365937-53366576	35.6164
chr9-102842355-102842892	chr9	102842355	102842892	ATGTTGCATGGCGGGCG	0.406457	0.392478	MACS_peak_3505	chr9	102842029	102842529	174	34.8	MACS_peak_3505	chr9	102842171	102842387	68.66	chr9-102842355-102842892	14.8148
chr20-53396146-53396842	chr20	53396146	53396842	TGGTCTTAGTACATACG	-0.142163	0.672434	MACS_peak_1960	chr20	53396079	53398079	696	34.8	MACS_peak_1960	chr20	53396048	53398110	79.03	chr20-53396146-53396842	33.7536
chr15-56923026-56923555	chr15	56923026	56923555	GCGAGGTAATTACGTAT	0.271104	0.546905	MACS_peak_1059	chr15	56922700	56923200	174	34.8	MACS_peak_1059	chr15	56922717	56923182	137.74	chr15-56923026-56923555	33.5484
chr10-80901547-80902240	chr10	80901547	80902240	CCCGGTGGGGGCTGGGG	-0.0939135	0.884651	MACS_peak_377	chr10	80902066	80902566	174	34.8	MACS_peak_377	chr10	80902204	80902428	77.79	chr10-80901547-80902240	16.0714
chr10-90695163-90696148	chr10	90695163	90696148	GGATATTATATCCTAGG	0.126058	0.818532	MACS_peak_389	chr10	90694837	90695337	174	34.8	no_overlap	.	.	.	.	.	.
chr9-68417980-68418641	chr9	68417980	68418641	AATAAGGGGTGGAGAGT	0.437726	0.336302	MACS_peak_3463	chr9	68417362	68418312	332	34.9474	MACS_peak_3463	chr9	68417325	68418349	77.53	chr9-68417980-68418641	36.0352
chr20-46293701-46294208	chr20	46293701	46294208	TTGGGTGTGTTTTGGAG;GGGGGGCCGGTGGTTTG	2.72483	7.58202e-27	MACS_peak_1944	chr20	46293278	46294728	507	34.9655	MACS_peak_1944	chr20	46293241	46294765	76.16	chr20-46293701-46294208	33.2677
chr6-75981160-75981748	chr6	75981160	75981748	TTTGTGGGTGCCGTTTG	0.500609	0.175854	MACS_peak_2955	chr6	75981573	75982073	175	35	MACS_peak_2955	chr6	75981617	75982029	128.26	chr6-75981160-75981748	31.7961
chr6-54053848-54054370	chr6	54053848	54054370	CATGGTGATGGCGTAGA	0.454014	0.230649	MACS_peak_2916	chr6	54054195	54054695	175	35	MACS_peak_2916	chr6	54054349	54054541	61.73	chr6-54053848-54054370	10.9375
chr17-59698896-59699773	chr17	59698896	59699773	CCATGCCGCCCCATTAC	0.254215	0.546397	MACS_peak_1334	chr17	59698351	59700851	877	35.08	MACS_peak_1334	chr17	59698322	59700879	82.32	chr17-59698896-59699773	34.298
chr20-53396472-53397174	chr20	53396472	53397174	TCTGTTACGTGGGATGG	0.191164	0.554045	MACS_peak_1960	chr20	53396079	53398079	702	35.1	MACS_peak_1960	chr20	53396048	53398110	79.03	chr20-53396472-53397174	34.0446
chr17-59698763-59699642	chr17	59698763	59699642	TATGTCGACTATTCGGC	-0.393327	0.134144	MACS_peak_1334	chr17	59698351	59700851	879	35.16	MACS_peak_1334	chr17	59698322	59700879	82.32	chr17-59698763-59699642	34.3762
chr3-64821770-64822403	chr3	64821770	64822403	CGTCTCTCGGTCAATTT	3.51065	2.12173e-29	MACS_peak_2123	chr3	64821118	64822918	633	35.1667	MACS_peak_2123	chr3	64821081	64822955	121.49	chr3-64821770-64822403	33.778
chr20-46620910-46621685	chr20	46620910	46621685	CCGGCTGGGACCCGAGG	-0.204631	0.714895	MACS_peak_1946	chr20	46621298	46622398	387	35.1818	MACS_peak_1946	chr20	46621272	46622423	730.37	chr20-46620910-46621685	35.8818
chr20-46620688-46621685	chr20	46620688	46621685	GGTGGGGTGCGTAGAGG	-0.714744	0.0869005	MACS_peak_1946	chr20	46621298	46622398	387	35.1818	MACS_peak_1946	chr20	46621272	46622423	730.37	chr20-46620688-46621685	35.8818
chr2-104506415-104506900	chr2	104506415	104506900	TCCAGGCGTGGCCGGAC	0.590702	0.00922472	MACS_peak_1691	chr2	104506724	104507224	176	35.2	MACS_peak_1691	chr2	104506858	104507089	66.25	chr2-104506415-104506900	18.1818
chr10-8115255-8115787	chr10	8115255	8115787	GCGCGGGGCTAACTAGC	-0.243165	0.559248	MACS_peak_309	chr10	8115611	8116111	176	35.2	MACS_peak_309	chr10	8115640	8116082	148.25	chr10-8115255-8115787	33.2579
chr3-63995468-63996016	chr3	63995468	63996016	AGTGTCAGGGGCTCGGC	-0.392388	0.340096	MACS_peak_2121	chr3	63995558	63996858	458	35.2308	MACS_peak_2121	chr3	63995518	63996897	66.06	chr3-63995468-63996016	36.1131
chr20-53365655-53366113	chr20	53365655	53366113	TTTAGGCAAATTTGTGC	-1.34245	0.0036445	MACS_peak_1959	chr20	53365088	53366388	458	35.2308	MACS_peak_1959	chr20	53365044	53366431	65.2	chr20-53365655-53366113	33.0209
chr20-53365922-53366380	chr20	53365922	53366380	TTTCTCAATGGATGAGG	-0.68972	0.0035326	MACS_peak_1959	chr20	53365088	53366388	458	35.2308	MACS_peak_1959	chr20	53365044	53366431	65.2	chr20-53365922-53366380	33.0209
chr17-59703079-59704041	chr17	59703079	59704041	TTTTATGCTAGATAATG	-1.45683	0.00540617	MACS_peak_1335	chr17	59703280	59705430	761	35.3953	MACS_peak_1335	chr17	59703249	59705461	147.58	chr17-59703079-59704041	35.8047
chr17-12740339-12741180	chr17	12740339	12741180	TAGCAGTGTGTGGCAGA	-0.231961	0.665567	MACS_peak_1260	chr17	12741003	12741503	177	35.4	MACS_peak_1260	chr17	12741124	12741381	62.44	chr17-12740339-12741180	21.7899
chr17-59703441-59704203	chr17	59703441	59704203	CTATTGGCGGTTGGAAT	0.519636	0.157464	MACS_peak_1335	chr17	59703280	59705430	762	35.4419	MACS_peak_1335	chr17	59703249	59705461	147.58	chr17-59703441-59704203	34.4485
chr8-128807924-128808314	chr8	128807924	128808314	TACGGCCTCTGTATAGC	3.7342	9.70253e-23	MACS_peak_3412	chr8	128807345	128808445	390	35.4545	MACS_peak_3412	chr8	128807314	128808476	189.13	chr8-128807924-128808314	33.5628
chr20-53365926-53366745	chr20	53365926	53366745	CTGCGGTGTGCGTTGAC	-0.0133016	0.988602	MACS_peak_1959	chr20	53365088	53366388	462	35.5385	MACS_peak_1959	chr20	53365044	53366431	65.2	chr20-53365926-53366745	36.4095
chr2-14427512-14428283	chr2	14427512	14428283	TTGCCAGTCCGGCTGAG	-0.47944	0.253962	MACS_peak_1576	chr2	14428105	14428605	178	35.6	MACS_peak_1576	chr2	14428164	14428545	136.69	chr2-14427512-14428283	31.2336
chr14-24139151-24139827	chr14	24139151	24139827	GAAGGCAATCATGGAGG	-0.149232	0.596403	MACS_peak_872	chr14	24139649	24140149	178	35.6	MACS_peak_872	chr14	24139606	24140191	258.86	chr14-24139151-24139827	37.7778
chr20-53365891-53366354	chr20	53365891	53366354	GTATGAGAGGGAACTCG	-0.0829375	0.833705	MACS_peak_1959	chr20	53365088	53366388	463	35.6154	MACS_peak_1959	chr20	53365044	53366431	65.2	chr20-53365891-53366354	33.3814
chr17-59698724-59699616	chr17	59698724	59699616	CGTTGTGTTTGATCCGT;TGCTGTAATGGCCGAGG	0.546436	0.0649146	MACS_peak_1334	chr17	59698351	59700851	892	35.68	MACS_peak_1334	chr17	59698322	59700879	82.32	chr17-59698724-59699616	34.8846
chr20-52937541-52938160	chr20	52937541	52938160	CATCCGGCTGCCATAAT;GGTTATCGTTGTGGGCG	0.0822608	0.834517	MACS_peak_1954	chr20	52937123	52937773	232	35.6923	MACS_peak_1954	chr20	52937097	52937798	63.93	chr20-52937541-52938160	36.6619
chr17-59361884-59362385	chr17	59361884	59362385	GGTAGGTGGATACGGCT	2.72714	1.68404e-12	MACS_peak_1330	chr17	59361548	59362948	501	35.7857	MACS_peak_1330	chr17	59361518	59362977	204.92	chr17-59361884-59362385	34.3386
chr9-136745734-136746263	chr9	136745734	136746263	CAAAGCTACGGGGCCGG	0.794592	0.0165882	MACS_peak_3562	chr9	136745905	136746905	358	35.8	MACS_peak_3562	chr9	136745872	136746937	927.04	chr9-136745734-136746263	36.7136
chr17-59361802-59362305	chr17	59361802	59362305	GGGGTTGGGCGGCGTTG	2.12135	1.57311e-07	MACS_peak_1330	chr17	59361548	59362948	503	35.9286	MACS_peak_1330	chr17	59361518	59362977	204.92	chr17-59361802-59362305	34.4757
chr6-85545322-85545824	chr6	85545322	85545824	AAGGTACCTTGCCGAAT	0.0881936	0.821516	MACS_peak_2974	chr6	85545644	85546144	180	36	MACS_peak_2974	chr6	85545763	85546025	93.9	chr6-85545322-85545824	23.2824
chr14-67399660-67400245	chr14	67399660	67400245	CTGTGTTGCATACGGGC	0.125845	0.753815	MACS_peak_931	chr14	67399244	67399894	234	36	MACS_peak_931	chr14	67399212	67399925	305.76	chr14-67399660-67400245	37.1669
chr3-63995461-63996027	chr3	63995461	63996027	AACTGGAACGTAGGCAT	-0.0712335	0.863587	MACS_peak_2121	chr3	63995558	63996858	469	36.0769	MACS_peak_2121	chr3	63995518	63996897	66.06	chr3-63995461-63996027	36.9108
chr20-46293925-46294449	chr20	46293925	46294449	GGAGTGGGTGCACAGTG	3.29547	7.39806e-19	MACS_peak_1944	chr20	46293278	46294728	524	36.1379	MACS_peak_1944	chr20	46293241	46294765	76.16	chr20-46293925-46294449	34.3832
chr20-53365454-53365924	chr20	53365454	53365924	TGTTGCGGCTGGTAAAG	0.370412	0.33592	MACS_peak_1959	chr20	53365088	53366388	470	36.1538	MACS_peak_1959	chr20	53365044	53366431	65.2	chr20-53365454-53365924	33.8861
chr5-110652943-110653475	chr5	110652943	110653475	ACACTGATTAGTTGGGT	0.113058	0.833238	MACS_peak_2699	chr5	110652624	110653124	181	36.2	MACS_peak_2699	chr5	110652729	110653019	75.62	chr5-110652943-110653475	26.2069
chr5-39830739-39831353	chr5	39830739	39831353	AGAAAGCAATCGCCGGT	0.901253	9.94155e-06	MACS_peak_2477	chr5	39831172	39831672	181	36.2	MACS_peak_2477	chr5	39831311	39831532	64.62	chr5-39830739-39831353	19.0045
chr16-86158215-86158961	chr16	86158215	86158961	GTTTTTTCCGGAGTGCG	-0.0221814	0.969271	MACS_peak_1239	chr16	86158780	86159280	181	36.2	MACS_peak_1239	chr16	86158883	86159176	70.08	chr16-86158215-86158961	26.6212
chr12-57424884-57425226	chr12	57424884	57425226	GTGTTTTTGGAATTAGG	0.11012	0.770617	MACS_peak_670	chr12	57425045	57425545	181	36.2	MACS_peak_670	chr12	57425159	57425431	77.82	chr12-57424884-57425226	24.6324
chr10-29259032-29259622	chr10	29259032	29259622	CTTATGTTAAAGGGACG	0.391551	0.401796	MACS_peak_340	chr10	29258713	29259213	181	36.2	MACS_peak_340	chr10	29258824	29259102	72.87	chr10-29259032-29259622	25.1799
chr3-64770284-64770893	chr3	64770284	64770893	CGGTCAGCCAACGGCTG;TGGATTTCGACCGTGGG	0.226238	0.842519	MACS_peak_2122	chr3	64770603	64771403	290	36.25	MACS_peak_2122	chr3	64770575	64771431	100.22	chr3-64770284-64770893	37.1495
chr20-46293715-46294242	chr20	46293715	46294242	GGGATTTTGATGTTTAG	2.85868	3.59824e-17	MACS_peak_1944	chr20	46293278	46294728	527	36.3448	MACS_peak_1944	chr20	46293241	46294765	76.16	chr20-46293715-46294242	34.5801
chr17-57015785-57016546	chr17	57015785	57016546	GCGGACAACGGTCACCG	-1.09324	0.00464467	MACS_peak_1318	chr17	57015276	57016076	291	36.375	MACS_peak_1318	chr17	57015248	57016103	60.24	chr17-57015785-57016546	37.193
chr3-63995504-63996031	chr3	63995504	63996031	TATGGCAAACATACGAG	-0.7192	0.0876098	MACS_peak_2121	chr3	63995558	63996858	473	36.3846	MACS_peak_2121	chr3	63995518	63996897	66.06	chr3-63995504-63996031	37.2009
chr5-102375892-102376465	chr5	102375892	102376465	ATCTGGGTCGGCGAAGA	0.175632	0.686624	MACS_peak_2676	chr5	102375574	102376074	182	36.4	MACS_peak_2676	chr5	102375717	102375930	65.46	chr5-102375892-102376465	17.8404
chr3-96271079-96271628	chr3	96271079	96271628	ACTTTCTGGTGTTCCGG	0.295321	0.264156	MACS_peak_2165	chr3	96271446	96271946	182	36.4	MACS_peak_2165	chr3	96271571	96271821	62.44	chr3-96271079-96271628	22.8
chr2-215227658-215228483	chr2	215227658	215228483	TTCGGCCTAAGGCGTGG	-0.116541	0.757052	MACS_peak_1859	chr2	215227340	215227840	182	36.4	MACS_peak_1859	chr2	215227460	215227720	85.93	chr2-215227658-215228483	23.8462
chr1-220510103-220510563	chr1	220510103	220510563	TAACGACGTTATAACGT	0.383391	0.156122	MACS_peak_274	chr1	220509785	220510285	182	36.4	MACS_peak_274	chr1	220509842	220510228	85.24	chr1-220510103-220510563	32.3834
chr7-33327759-33328299	chr7	33327759	33328299	GCCGCATACCCCGGGCC	-0.467256	0.581704	MACS_peak_3121	chr7	33327314	33328014	255	36.4286	MACS_peak_3121	chr7	33327288	33328039	609.56	chr7-33327759-33328299	37.2836
chr13-75988666-75989142	chr13	75988666	75989142	TAGGTGTTTAGGCGGGC	0.118584	0.820428	MACS_peak_857	chr13	75988349	75988849	183	36.6	MACS_peak_857	chr13	75988519	75988679	66.04	chr13-75988666-75989142	8.125
chr10-24545221-24545864	chr10	24545221	24545864	TGCGAGAGGATGTTGGT	0.425236	0.180392	MACS_peak_332	chr10	24544904	24545404	183	36.6	MACS_peak_332	chr10	24544937	24545371	237.79	chr10-24545221-24545864	34.5622
chr8-29628186-29628701	chr8	29628186	29628701	GGACTGTAGTTCTATCG	0.156191	0.66896	MACS_peak_3290	chr8	29627806	29628406	220	36.6667	MACS_peak_3290	chr8	29627773	29628438	1482.78	chr8-29628186-29628701	37.8947
chr3-64821744-64822404	chr3	64821744	64822404	CATTTATGTCTGGCGTG	3.67677	8.58545e-33	MACS_peak_2123	chr3	64821118	64822918	660	36.6667	MACS_peak_2123	chr3	64821081	64822955	121.49	chr3-64821744-64822404	35.2188
chr1-107436131-107436615	chr1	107436131	107436615	GTTTTTGATCGCGTTTC	-0.21879	0.691872	MACS_peak_101	chr1	107436340	107437090	275	36.6667	MACS_peak_101	chr1	107436293	107437137	96.04	chr1-107436131-107436615	38.1517
chr17-59827862-59828871	chr17	59827862	59828871	GTGAAGGGCATGCGGGG	-0.0800876	0.849428	MACS_peak_1341	chr17	59826452	59829202	1009	36.6909	MACS_peak_1341	chr17	59826412	59829241	63.66	chr17-59827862-59828871	35.6663
chr20-53365911-53366473	chr20	53365911	53366473	GCGCAGGGGGCAGAGTG	-0.764803	0.0137805	MACS_peak_1959	chr20	53365088	53366388	477	36.6923	MACS_peak_1959	chr20	53365044	53366431	65.2	chr20-53365911-53366473	37.491
chr20-53396260-53396995	chr20	53396260	53396995	GTAGGGCGTTGTCGGGG	-0.297507	0.573941	MACS_peak_1960	chr20	53396079	53398079	735	36.75	MACS_peak_1960	chr20	53396048	53398110	79.03	chr20-53396260-53396995	35.645
chr6-30688361-30689094	chr6	30688361	30689094	ATGTGGGCGGTGGTGCA	0.400504	0.351642	MACS_peak_2862	chr6	30688045	30688545	184	36.8	MACS_peak_2862	chr6	30688149	30688441	96.62	chr6-30688361-30689094	27.3973
chr20-53396425-53397161	chr20	53396425	53397161	GGAAGTAGCTATGACAT;AGTCGGAGTGGACACCC;TCGGACACGAGTGCCGG	0.139852	0.885814	MACS_peak_1960	chr20	53396079	53398079	736	36.8	MACS_peak_1960	chr20	53396048	53398110	79.03	chr20-53396425-53397161	35.6935
chr2-207370504-207370730	chr2	207370504	207370730	GACGACCGTATTACGGA;AGATTCGTATTGGGGGG	-0.305478	0.426059	MACS_peak_1848	chr2	207370188	207370688	184	36.8	MACS_peak_1848	chr2	207370335	207370540	79.12	chr2-207370504-207370730	17.561
chr2-30506281-30506849	chr2	30506281	30506849	TCGCGGTAAGGGCGAGT	-0.656526	0.346721	MACS_peak_1605	chr2	30506665	30507165	184	36.8	MACS_peak_1605	chr2	30506798	30507032	62.58	chr2-30506281-30506849	21.7949
chr18-20857595-20858057	chr18	20857595	20858057	GGGCGGGGGTGGGGGCG	-0.0842595	0.909531	MACS_peak_1422	chr18	20857279	20857779	184	36.8	MACS_peak_1422	chr18	20857417	20857640	67.56	chr18-20857595-20858057	20.1794
chr20-46293702-46294236	chr20	46293702	46294236	TCAGTTAAGCGCGAGGG	3.20268	1.87893e-12	MACS_peak_1944	chr20	46293278	46294728	534	36.8276	MACS_peak_1944	chr20	46293241	46294765	76.16	chr20-46293702-46294236	35.0394
chr20-46293631-46294165	chr20	46293631	46294165	AAATGGGGCAGGTCGGG	0.46406	0.0934144	MACS_peak_1944	chr20	46293278	46294728	534	36.8276	MACS_peak_1944	chr20	46293241	46294765	76.16	chr20-46293631-46294165	35.0394
chr2-178034267-178034943	chr2	178034267	178034943	CACAAATCACCCGGGGC	0.0540755	0.924096	MACS_peak_1795	chr2	178034740	178035290	203	36.9091	MACS_peak_1795	chr2	178034702	178035327	370.78	chr2-178034267-178034943	38.56
chr20-53365777-53366257	chr20	53365777	53366257	GGGGGGCGTGTGGGAGC;GGTACCAGGTTTGGGCG	-0.0527313	0.784616	MACS_peak_1959	chr20	53365088	53366388	480	36.9231	MACS_peak_1959	chr20	53365044	53366431	65.2	chr20-53365777-53366257	34.6071
chr5-74517193-74517943	chr5	74517193	74517943	GCATAGCAGGGGCTGGC	0.0604545	0.893689	MACS_peak_2621	chr5	74517758	74518258	185	37	MACS_peak_2621	chr5	74517921	74518095	64.9	chr5-74517193-74517943	12.6437
chr5-74517200-74517943	chr5	74517200	74517943	GAGCAACCGGGGGGGGG	0.0234366	0.965905	MACS_peak_2621	chr5	74517758	74518258	185	37	MACS_peak_2621	chr5	74517921	74518095	64.9	chr5-74517200-74517943	12.6437
chr2-226479732-226480469	chr2	226479732	226480469	ACAGCCTGCCCGGGAGC	0.649338	0.151266	MACS_peak_1884	chr2	226480284	226480784	185	37	MACS_peak_1884	chr2	226480335	226480732	104.4	chr2-226479732-226480469	33.7531
chr18-44202475-44203420	chr18	44202475	44203420	GAATCTATGTTGAGGTG	-0.103785	0.892452	MACS_peak_1429	chr18	44203235	44203735	185	37	MACS_peak_1429	chr18	44203364	44203605	75.41	chr18-44202475-44203420	23.2365
chr14-60184992-60185486	chr14	60184992	60185486	GGGAGGGTTATGGTGGG	-0.589809	0.0273854	MACS_peak_917	chr14	60184677	60185177	185	37	MACS_peak_917	chr14	60184849	60185005	60.84	chr14-60184992-60185486	8.33333
chr14-21219581-21220110	chr14	21219581	21220110	GAAGAATAGGCCGGTTG	0.192749	0.718008	MACS_peak_870	chr14	21219925	21220425	185	37	MACS_peak_870	chr14	21220050	21220300	65.18	chr14-21219581-21220110	24
chr17-59756553-59757276	chr17	59756553	59757276	GCCGGACCCTGTTCAAC	0.150809	0.817879	MACS_peak_1338	chr17	59755395	59757345	723	37.0769	MACS_peak_1338	chr17	59755362	59757378	75.13	chr17-59756553-59757276	35.8631
chr15-73458461-73458940	chr15	73458461	73458940	ATTCGGCCGGGACAGGG	0.140395	0.883116	MACS_peak_1086	chr15	73458052	73458702	241	37.0769	MACS_peak_1086	chr15	73458002	73458751	418.91	chr15-73458461-73458940	38.7183
chr1-144010905-144011377	chr1	144010905	144011377	AGGCTTTGCCTTGGGAG	0.0483699	0.9536	MACS_peak_125	chr1	144010465	144011165	260	37.1429	MACS_peak_125	chr1	144010426	144011203	496.63	chr1-144010905-144011377	38.3526
chr8-110830130-110830660	chr8	110830130	110830660	CTGAGCAGGTGCTGGGG	-0.184165	0.645409	MACS_peak_3360	chr8	110830474	110830974	186	37.2	MACS_peak_3360	chr8	110830593	110830854	68.52	chr8-110830130-110830660	25.6705
chr6-111428477-111429001	chr6	111428477	111429001	TGGCTGGCCAGCGGGTA	-0.108267	0.774235	MACS_peak_3018	chr6	111428163	111428663	186	37.2	MACS_peak_3018	chr6	111428214	111428611	115.57	chr6-111428477-111429001	33.7531
chr5-163547192-163547788	chr5	163547192	163547788	ATCAAGAGGATAGGTAG	-0.327093	0.724358	MACS_peak_2802	chr5	163546878	163547378	186	37.2	MACS_peak_2802	chr5	163546880	163547376	244.62	chr5-163547192-163547788	37.0968
chr16-27034703-27035315	chr16	27034703	27035315	TGGGTCCTCTCCTAATG	-0.0769409	0.919623	MACS_peak_1145	chr16	27034389	27034889	186	37.2	MACS_peak_1145	chr16	27034475	27034802	63.69	chr16-27034703-27035315	30.2752
chr1-227417453-227418150	chr1	227417453	227418150	CGGGGCGGGCACGGCGT	0.454268	0.0949329	MACS_peak_282	chr1	227417139	227417639	186	37.2	MACS_peak_282	chr1	227417276	227417502	67.03	chr1-227417453-227418150	21.6814
chr1-8923459-8923996	chr1	8923459	8923996	GAAAGGCCCAGGTAGGG	0.181955	0.508222	MACS_peak_10	chr1	8923810	8924310	186	37.2	MACS_peak_10	chr1	8923914	8924205	69.9	chr1-8923459-8923996	28.1787
chr20-53365018-53365572	chr20	53365018	53365572	AAGAGGGGTCCATGGTC	0.368424	0.440235	MACS_peak_1959	chr20	53365088	53366388	484	37.2308	MACS_peak_1959	chr20	53365044	53366431	65.2	chr20-53365018-53365572	38.0678
chr20-53365494-53365979	chr20	53365494	53365979	TACACGTACGTAACCAC	0.194892	0.483085	MACS_peak_1959	chr20	53365088	53366388	485	37.3077	MACS_peak_1959	chr20	53365044	53366431	65.2	chr20-53365494-53365979	34.9676
chr20-53396281-53397028	chr20	53396281	53397028	GGGTCGCGAATGTCGTG;AAAAGCTTGAATAGTGC	0.236858	0.843108	MACS_peak_1960	chr20	53396079	53398079	747	37.35	MACS_peak_1960	chr20	53396048	53398110	79.03	chr20-53396281-53397028	36.227
chr1-205683643-205684331	chr1	205683643	205684331	CTGGATGCAGGTAACAC;CGCAATGAACAAACCTA	0.202317	0.861224	MACS_peak_252	chr1	205684088	205684738	243	37.3846	MACS_peak_251	chr1	205683444	205683920	76.41	chr1-205683643-205684331	58.1933
chr5-40577367-40577963	chr5	40577367	40577963	GTAGCTGCGGTCTGTAG	0.326928	0.509273	MACS_peak_2488	chr5	40577776	40578276	187	37.4	MACS_peak_2488	chr5	40577852	40578199	90.97	chr5-40577367-40577963	31.9885
chr17-59755469-59756199	chr17	59755469	59756199	CGGGGGGGAGAGGGAGG	-0.94744	0.0174131	MACS_peak_1338	chr17	59755395	59757345	730	37.4359	MACS_peak_1338	chr17	59755362	59757378	75.13	chr17-59755469-59756199	36.2103
chr3-63995589-63996077	chr3	63995589	63996077	CCCCTAGTCCATGAGTG	-0.129372	0.776696	MACS_peak_2121	chr3	63995558	63996858	488	37.5385	MACS_peak_2121	chr3	63995518	63996897	66.06	chr3-63995589-63996077	35.388
chr17-55601610-55602129	chr17	55601610	55602129	GCAGAGGGATGGCGTTA	0.558397	0.102886	MACS_peak_1310	chr17	55601204	55601854	244	37.5385	MACS_peak_1310	chr17	55601163	55601894	613.8	chr17-55601610-55602129	38.8509
chr17-59362048-59362574	chr17	59362048	59362574	GTATGGTGGCTGGCGGA;CCGTGGACGCTAGCGCC	4.11208	1.23085e-67	MACS_peak_1330	chr17	59361548	59362948	526	37.5714	MACS_peak_1330	chr17	59361518	59362977	204.92	chr17-59362048-59362574	36.0521
chr2-30506283-30506853	chr2	30506283	30506853	TGCTGTTAATATATGCT	-0.0419113	0.944618	MACS_peak_1605	chr2	30506665	30507165	188	37.6	MACS_peak_1605	chr2	30506798	30507032	62.58	chr2-30506283-30506853	23.5043
chr17-59827709-59828743	chr17	59827709	59828743	CGTCAGGGGCGGGGCGG	-0.42925	0.161203	MACS_peak_1341	chr17	59826452	59829202	1034	37.6	MACS_peak_1341	chr17	59826412	59829241	63.66	chr17-59827709-59828743	36.55
chr17-59698726-59699666	chr17	59698726	59699666	CCACTAGAAAAACCCAG	-0.212713	0.83036	MACS_peak_1334	chr17	59698351	59700851	940	37.6	MACS_peak_1334	chr17	59698322	59700879	82.32	chr17-59698726-59699666	36.7618
chr11-78866734-78867243	chr11	78866734	78867243	ATGGGGGGTGGACGTTC	3.07288	8.44536e-22	MACS_peak_543	chr11	78867055	78867555	188	37.6	MACS_peak_543	chr11	78867164	78867445	60.99	chr11-78866734-78867243	28.1139
chr8-107620590-107620816	chr8	107620590	107620816	CGATGGTCTGTTGAGCG	0.270521	0.654627	MACS_peak_3351	chr8	107620586	107621186	226	37.6667	MACS_peak_3351	chr8	107620553	107621219	206.79	chr8-107620590-107620816	33.9339
chr9-68417099-68417720	chr9	68417099	68417720	GATATGCGGTAACATGA	0.125634	0.856934	MACS_peak_3463	chr9	68417362	68418312	358	37.6842	MACS_peak_3463	chr9	68417325	68418349	77.53	chr9-68417099-68417720	38.5742
chr17-59698896-59699841	chr17	59698896	59699841	GTGTAAGGGCGGCGATA	-0.341802	0.695714	MACS_peak_1334	chr17	59698351	59700851	945	37.8	MACS_peak_1334	chr17	59698322	59700879	82.32	chr17-59698896-59699841	36.9574
chr14-24139960-24140557	chr14	24139960	24140557	TCTCACCAACGGGTTGC	0.255493	0.694268	MACS_peak_872	chr14	24139649	24140149	189	37.8	MACS_peak_872	chr14	24139606	24140191	258.86	chr14-24139960-24140557	39.4872
chr1-216500984-216501475	chr1	216500984	216501475	AAACTCCGCTCCGGGGT	-0.391646	0.237115	MACS_peak_264	chr1	216500673	216501173	189	37.8	MACS_peak_264	chr1	216500732	216501114	64.29	chr1-216500984-216501475	34.0314
chr20-46293319-46293868	chr20	46293319	46293868	CTTTTGTTGCCTAAATT	-0.2031	0.54205	MACS_peak_1944	chr20	46293278	46294728	549	37.8621	MACS_peak_1944	chr20	46293241	46294765	76.16	chr20-46293319-46293868	36.0236
chr20-46621035-46621715	chr20	46621035	46621715	TCTCAGCGAAACACACG;TAAGGTCCTTATTTCCG	0.168094	0.938918	MACS_peak_1946	chr20	46621298	46622398	417	37.9091	MACS_peak_1946	chr20	46621272	46622423	730.37	chr20-46621035-46621715	38.4883
chr3-63995611-63996104	chr3	63995611	63996104	AAGATGCGCTAATATTA	0.468642	0.406962	MACS_peak_2121	chr3	63995558	63996858	493	37.9231	MACS_peak_2121	chr3	63995518	63996897	66.06	chr3-63995611-63996104	35.7505
chr8-124856893-124857368	chr8	124856893	124857368	ACCCGGGTTATCCATGT	3.41621	2.9331e-19	MACS_peak_3402	chr8	124856559	124857809	475	38	MACS_peak_3402	chr8	124856525	124857842	647.49	chr8-124856893-124857368	36.0668
chr8-29627324-29628034	chr8	29627324	29628034	CTAAGACGTAGTTTGGA;GAATGCCAGCTTACAGG	0.324398	0.663069	MACS_peak_3290	chr8	29627806	29628406	228	38	MACS_peak_3290	chr8	29627773	29628438	1482.78	chr8-29627324-29628034	39.2481
chr20-46293832-46294383	chr20	46293832	46294383	TGTCTTGGAGGCTTGGG	3.19495	7.73488e-20	MACS_peak_1944	chr20	46293278	46294728	551	38	MACS_peak_1944	chr20	46293241	46294765	76.16	chr20-46293832-46294383	36.1549
chr17-59361860-59362393	chr17	59361860	59362393	GTGTAATGTGTGATACA;TACTACCGATAATGCAG	1.48837	0.00142758	MACS_peak_1330	chr17	59361548	59362948	533	38.0714	MACS_peak_1330	chr17	59361518	59362977	204.92	chr17-59361860-59362393	36.5319
chr3-63995455-63996053	chr3	63995455	63996053	GCTGCTTGCAGTAACAG	0.0900301	0.899621	MACS_peak_2121	chr3	63995558	63996858	495	38.0769	MACS_peak_2121	chr3	63995518	63996897	66.06	chr3-63995455-63996053	38.7962
chr8-90858813-90859313	chr8	90858813	90859313	AAACAGGCCCGAGAGCT	-0.302044	0.49548	MACS_peak_3326	chr8	90859122	90859622	191	38.2	MACS_peak_3326	chr8	90859209	90859534	61.24	chr8-90858813-90859313	32
chr5-141947888-141948594	chr5	141947888	141948594	TATGGTATTTGGAATTT	-1.16402	0.000242837	MACS_peak_2765	chr5	141948403	141948903	191	38.2	MACS_peak_2765	chr5	141948521	141948785	68.17	chr5-141947888-141948594	27.6515
chr20-29647729-29648229	chr20	29647729	29648229	CGGGTGGGGGGCGTCGC	-0.602481	0.0122487	MACS_peak_1925	chr20	29648038	29648538	191	38.2	MACS_peak_1925	chr20	29647999	29648576	66.67	chr20-29647729-29648229	39.8614
chr10-133610062-133610603	chr10	133610062	133610603	GGTTTGTAAGAGGGTTT	-0.146655	0.757869	MACS_peak_428	chr10	133609753	133610253	191	38.2	MACS_peak_428	chr10	133609823	133610182	132.26	chr10-133610062-133610603	33.4262
chr20-53365891-53366625	chr20	53365891	53366625	GTAAAATCCGTGCACCG;AAATGTGGATTTTTATA	0.229092	0.435062	MACS_peak_1959	chr20	53365088	53366388	497	38.2308	MACS_peak_1959	chr20	53365044	53366431	65.2	chr20-53365891-53366625	38.9329
chr3-63995896-63996394	chr3	63995896	63996394	ACGTTAGCCTAGCAGGT	0.0985839	0.764517	MACS_peak_2121	chr3	63995558	63996858	498	38.3077	MACS_peak_2121	chr3	63995518	63996897	66.06	chr3-63995896-63996394	36.1131
chr3-63996163-63996661	chr3	63996163	63996661	CGGAGGCGCCAATACGA	0.30416	0.222674	MACS_peak_2121	chr3	63995558	63996858	498	38.3077	MACS_peak_2121	chr3	63995518	63996897	66.06	chr3-63996163-63996661	36.1131
chr3-63995698-63996197	chr3	63995698	63996197	CCGGCGCCAGGCGCGGG	-0.245938	0.53967	MACS_peak_2121	chr3	63995558	63996858	499	38.3846	MACS_peak_2121	chr3	63995518	63996897	66.06	chr3-63995698-63996197	36.1856
chr20-53365231-53365730	chr20	53365231	53365730	ACTAGTCAAATATGTTA	-0.392139	0.0586085	MACS_peak_1959	chr20	53365088	53366388	499	38.3846	MACS_peak_1959	chr20	53365044	53366431	65.2	chr20-53365231-53365730	35.9769
chr5-66390929-66391504	chr5	66390929	66391504	AGATCAAGCGTGCCTGG;TTCGTGGTCATTATCTT	-0.126086	0.869962	MACS_peak_2609	chr5	66390621	66391121	192	38.4	MACS_peak_2609	chr5	66390613	66391128	158.1	chr5-66390929-66391504	38.6408
chr19-46135978-46136743	chr19	46135978	46136743	TATAACCGGAGGTTTGG	0.806951	0.100352	MACS_peak_1523	chr19	46135670	46136170	192	38.4	MACS_peak_1523	chr19	46135689	46136151	165.53	chr19-46135978-46136743	37.4459
chr15-67587593-67588089	chr15	67587593	67588089	TACATAGTAATGCAAAC	-0.142863	0.629732	MACS_peak_1077	chr15	67587285	67587785	192	38.4	MACS_peak_1077	chr15	67587425	67587645	64.78	chr15-67587593-67588089	23.6364
chr17-59756596-59757457	chr17	59756596	59757457	ATGGACAACGGTGAAGC	0.31208	0.458418	MACS_peak_1338	chr17	59755395	59757345	749	38.4103	MACS_peak_1338	chr17	59755362	59757378	75.13	chr17-59756596-59757457	38.7897
chr20-46621867-46622291	chr20	46621867	46622291	GGCCTGGGCGGGCAGGG	3.58484	2.77055e-18	MACS_peak_1946	chr20	46621298	46622398	424	38.5455	MACS_peak_1946	chr20	46621272	46622423	730.37	chr20-46621867-46622291	36.8375
chr6-151177742-151178379	chr6	151177742	151178379	AGGCGGGGGGGAGGGAC	0.218139	0.434803	MACS_peak_3068	chr6	151178186	151178686	193	38.6	MACS_peak_3068	chr6	151178204	151178668	294.23	chr6-151177742-151178379	37.7155
chr5-61576134-61576836	chr5	61576134	61576836	AACACGGCATCCTACCT;ATCCGATGGTGGGCTGG	-0.743149	0.129496	MACS_peak_2600	chr5	61575827	61576327	193	38.6	MACS_peak_2600	chr5	61575786	61576368	260.03	chr5-61576134-61576836	40.2062
chr5-42838493-42839021	chr5	42838493	42839021	TCAGGGAGCAGGTGGGT	-0.265434	0.442952	MACS_peak_2521	chr5	42838828	42839328	193	38.6	MACS_peak_2521	chr5	42838905	42839251	73.44	chr5-42838493-42839021	33.526
chr16-70598283-70598963	chr16	70598283	70598963	CAGTGCGTCCCATTGGC	-0.459863	0.156222	MACS_peak_1177	chr16	70598770	70599270	193	38.6	MACS_peak_1177	chr16	70598906	70599134	60.93	chr16-70598283-70598963	25
chr11-73846486-73847122	chr11	73846486	73847122	TTATATGTCACTGACGC	-0.161843	0.801234	MACS_peak_532	chr11	73846179	73846679	193	38.6	MACS_peak_532	chr11	73846227	73846631	98.59	chr11-73846486-73847122	35.8911
chr1-170964492-170965009	chr1	170964492	170965009	TAGTGTTCGTATGTAGG	-0.119213	0.756599	MACS_peak_169	chr1	170964816	170965316	193	38.6	MACS_peak_169	chr1	170964908	170965223	61.85	chr1-170964492-170965009	32.0635
chr15-52849974-52850484	chr15	52849974	52850484	TCAACGCGTGGTGTGGG;ATTGGGTGGACTTAGGG	0.0874129	0.957447	MACS_peak_1028	chr15	52850252	52850852	232	38.6667	MACS_peak_1028	chr15	52850209	52850895	86.17	chr15-52849974-52850484	40.0875
chr17-59362209-59362751	chr17	59362209	59362751	CGGGCGCTAAGGTTGGT	-0.0104258	0.989058	MACS_peak_1330	chr17	59361548	59362948	542	38.7143	MACS_peak_1330	chr17	59361518	59362977	204.92	chr17-59362209-59362751	37.1487
chr17-59362406-59363134	chr17	59362406	59363134	CAGTGTCCGGGGTGGGG	-0.38801	0.0949005	MACS_peak_1330	chr17	59361548	59362948	542	38.7143	MACS_peak_1330	chr17	59361518	59362977	204.92	chr17-59362406-59363134	39.1364
chr10-129737842-129738152	chr10	129737842	129738152	TAGGACGTACCTCCGGT	4.42286	6.27739e-35	MACS_peak_423	chr10	129737720	129738520	310	38.75	MACS_peak_423	chr10	129737684	129738555	463.92	chr10-129737842-129738152	35.5913
chr3-33110420-33111309	chr3	33110420	33111309	CTGTGTAGGGAAATGTT	-0.88492	0.0561603	MACS_peak_2102	chr3	33110114	33110614	194	38.8	MACS_peak_2102	chr3	33110233	33110495	63.36	chr3-33110420-33111309	28.626
chr2-150623751-150623983	chr2	150623751	150623983	AGGACCAGTGGGAGGTG;TAGTGTGGCGCAGTGGG	0.128712	0.821071	MACS_peak_1744	chr2	150623445	150623945	194	38.8	MACS_peak_1744	chr2	150623577	150623812	65.16	chr2-150623751-150623983	25.9574
chr12-94867246-94867982	chr12	94867246	94867982	CGAAAAAGTCGCTTGCT	-0.253877	0.61598	MACS_peak_770	chr12	94866940	94867440	194	38.8	MACS_peak_770	chr12	94867050	94867329	77.61	chr12-94867246-94867982	29.7491
chr8-128807243-128807772	chr8	128807243	128807772	TCTGGTAGCAAATTGTA	-0.319657	0.283407	MACS_peak_3412	chr8	128807345	128808445	427	38.8182	MACS_peak_3412	chr8	128807314	128808476	189.13	chr8-128807243-128807772	39.4148
chr3-63995925-63996430	chr3	63995925	63996430	ATCTTTGACTTATATGG	-0.172606	0.531757	MACS_peak_2121	chr3	63995558	63996858	505	38.8462	MACS_peak_2121	chr3	63995518	63996897	66.06	chr3-63995925-63996430	36.6207
chrX-47678035-47678619	chrX	47678035	47678619	CCGGTGAGGGGTACTGG	3.37317	1.00774e-16	MACS_peak_3598	chrX	47678424	47678924	195	39	MACS_peak_3598	chrX	47678551	47678796	74.75	chrX-47678035-47678619	27.7551
chr8-124624801-124625556	chr8	124624801	124625556	GGGGGCAGTGCGGGGCC	-0.163981	0.59872	MACS_peak_3401	chr8	124624496	124624996	195	39	MACS_peak_3401	chr8	124624474	124625018	198.53	chr8-124624801-124625556	39.8897
chr5-141947886-141948598	chr5	141947886	141948598	ACGGTGAGAGAAGGCAA	1.43429	5.34709e-07	MACS_peak_2765	chr5	141948403	141948903	195	39	MACS_peak_2765	chr5	141948521	141948785	68.17	chr5-141947886-141948598	29.1667
chr3-63995725-63996232	chr3	63995725	63996232	GGCGGGTCTACGGCATA	0.339448	0.380661	MACS_peak_2121	chr3	63995558	63996858	507	39	MACS_peak_2121	chr3	63995518	63996897	66.06	chr3-63995725-63996232	36.7658
chr3-33110419-33110971	chr3	33110419	33110971	GCACGCGAGCAGTAGGG	-0.373141	0.294214	MACS_peak_2102	chr3	33110114	33110614	195	39	MACS_peak_2102	chr3	33110233	33110495	63.36	chr3-33110419-33110971	29.0076
chr3-6174700-6175473	chr3	6174700	6175473	CATGAGCGGCTGATGTG	0.000316889	0.999468	MACS_peak_2054	chr3	6174395	6174895	195	39	MACS_peak_2054	chr3	6174576	6174713	71.93	chr3-6174700-6175473	9.48905
chr5-69431681-69432395	chr5	69431681	69432395	CGTGTTTGCCACCTTTG;AATTTTAGGGCACGTGG	0.0255518	0.713067	neg_region_30	chr5	69432200	69432700	195	39	no_overlap	.	.	.	.	.	.
chr17-59698521-59699497	chr17	59698521	59699497	CGCGGCGGGAACCGGGC	-0.400946	0.167032	MACS_peak_1334	chr17	59698351	59700851	976	39.04	MACS_peak_1334	chr17	59698322	59700879	82.32	chr17-59698521-59699497	38.1697
chr20-53365473-53365981	chr20	53365473	53365981	GTAAGCGTTAGGCAGGT	0.0120873	0.983666	MACS_peak_1959	chr20	53365088	53366388	508	39.0769	MACS_peak_1959	chr20	53365044	53366431	65.2	chr20-53365473-53365981	36.6258
chr20-53365640-53366148	chr20	53365640	53366148	AAGCCCAGGCGCAAGGG	-0.147478	0.791196	MACS_peak_1959	chr20	53365088	53366388	508	39.0769	MACS_peak_1959	chr20	53365044	53366431	65.2	chr20-53365640-53366148	36.6258
chr20-46293689-46294256	chr20	46293689	46294256	GACAGGAGGCCAAGTGC;TCGTACATTTCATCACG	2.90273	3.8772e-36	MACS_peak_1944	chr20	46293278	46294728	567	39.1034	MACS_peak_1944	chr20	46293241	46294765	76.16	chr20-46293689-46294256	37.2047
chr20-53396450-53397233	chr20	53396450	53397233	TTCCCGATGTAGATTGG	0.200678	0.747654	MACS_peak_1960	chr20	53396079	53398079	783	39.15	MACS_peak_1960	chr20	53396048	53398110	79.03	chr20-53396450-53397233	37.9728
chr5-45832146-45832703	chr5	45832146	45832703	CGGGGGAGGCGCTCGGA	-0.645754	0.127831	MACS_peak_2575	chr5	45831842	45832342	196	39.2	MACS_peak_2575	chr5	45831969	45832214	64.14	chr5-45832146-45832703	27.7551
chr5-40578080-40578846	chr5	40578080	40578846	ATTGCGTTTTTATCATT	0.0750648	0.8263	MACS_peak_2488	chr5	40577776	40578276	196	39.2	MACS_peak_2488	chr5	40577852	40578199	90.97	chr5-40578080-40578846	34.2939
chr10-95182702-95183341	chr10	95182702	95183341	GAGGCCGTCGTAAGGAG;TAGCAGGCCCATGTCGG	-1.38567	6.00776e-05	MACS_peak_394	chr10	95182398	95182898	196	39.2	MACS_peak_394	chr10	95182582	95182713	77.82	chr10-95182702-95183341	8.39695
chr20-53365494-53366004	chr20	53365494	53366004	TGTGGGCCAGGTGGGCG	-0.636445	0.138591	MACS_peak_1959	chr20	53365088	53366388	510	39.2308	MACS_peak_1959	chr20	53365044	53366431	65.2	chr20-53365494-53366004	36.77
chr20-52937518-52938025	chr20	52937518	52938025	CGAGGCTATAGGGCGTG	0.714569	0.0426163	MACS_peak_1954	chr20	52937123	52937773	255	39.2308	MACS_peak_1954	chr20	52937097	52937798	63.93	chr20-52937518-52938025	39.9429
chr20-53365172-53365683	chr20	53365172	53365683	GTGGGGTTGGAGGTGGA;AGACATCCAGGGGCGAG	0.42932	0.497671	MACS_peak_1959	chr20	53365088	53366388	511	39.3077	MACS_peak_1959	chr20	53365044	53366431	65.2	chr20-53365172-53365683	36.8421
chr8-107620950-107621543	chr8	107620950	107621543	CAGGATGACGTTGGGGG	0.191998	0.741384	MACS_peak_3351	chr8	107620586	107621186	236	39.3333	MACS_peak_3351	chr8	107620553	107621219	206.79	chr8-107620950-107621543	40.3904
chr17-59362009-59362560	chr17	59362009	59362560	AAAGCCAGCTTGATGAT	2.41644	4.76523e-08	MACS_peak_1330	chr17	59361548	59362948	551	39.3571	MACS_peak_1330	chr17	59361518	59362977	204.92	chr17-59362009-59362560	37.7656
chr20-52936704-52937379	chr20	52936704	52937379	TATCTCAAGAGCCCTTA	0.0830234	0.860479	MACS_peak_1954	chr20	52937123	52937773	256	39.3846	MACS_peak_1954	chr20	52937097	52937798	63.93	chr20-52936704-52937379	40.2282
chr5-165258719-165259481	chr5	165258719	165259481	AGAGTGCGAGTGTGGCG	-0.157773	0.799387	MACS_peak_2807	chr5	165259284	165259784	197	39.4	MACS_peak_2807	chr5	165259397	165259671	70.3	chr5-165258719-165259481	30.6569
chr20-29647670-29648235	chr20	29647670	29648235	TCGACAAGCTGCGTCAC	0.117093	0.804284	MACS_peak_1925	chr20	29648038	29648538	197	39.4	MACS_peak_1925	chr20	29647999	29648576	66.67	chr20-29647670-29648235	40.9012
chr1-115273190-115273915	chr1	115273190	115273915	CCGAGTACGGTGATGGT	-0.18739	0.516012	MACS_peak_118	chr1	115272887	115273387	197	39.4	MACS_peak_118	chr1	115272851	115273422	84.19	chr1-115273190-115273915	40.6305
chrX-4628080-4628805	chrX	4628080	4628805	TAGTTGTAGGGCGTGAG	1.4128	0.00422202	MACS_peak_3574	chrX	4628588	4629138	217	39.4545	MACS_peak_3574	chrX	4628539	4629186	458.98	chrX-4628080-4628805	41.1128
chr20-53365874-53366831	chr20	53365874	53366831	GGCGGGTTGAACGAGTC	-0.0563455	0.948137	MACS_peak_1959	chr20	53365088	53366388	514	39.5385	MACS_peak_1959	chr20	53365044	53366431	65.2	chr20-53365874-53366831	40.1586
chr7-152794246-152794981	chr7	152794246	152794981	TATTGCGGGGGTCGGGG	-0.0378792	0.946949	MACS_peak_3247	chr7	152793944	152794444	198	39.6	MACS_peak_3247	chr7	152794066	152794321	62.19	chr7-152794246-152794981	29.4118
chr6-44653194-44653758	chr6	44653194	44653758	TCGGGCGGCGTATGGGG	-0.128603	0.803926	MACS_peak_2896	chr6	44652892	44653392	198	39.6	MACS_peak_2896	chr6	44652886	44653397	428.98	chr6-44653194-44653758	39.726
chr5-81572973-81573607	chr5	81572973	81573607	GTACAGCGGGACGGGTC	-0.830957	0.0953231	MACS_peak_2633	chr5	81573409	81573909	198	39.6	MACS_peak_2633	chr5	81573503	81573814	101.98	chr5-81572973-81573607	33.4405
chr3-159547624-159548110	chr3	159547624	159548110	AGGACTCCGGTGGAGAG	1.08265	3.04566e-05	MACS_peak_2223	chr3	159547322	159547822	198	39.6	MACS_peak_2223	chr3	159547310	159547834	382.91	chr3-159547624-159548110	40.0763
chr3-105091458-105092006	chr3	105091458	105092006	GGTGGGGGGCGGGTCTT	3.12641	6.022e-21	MACS_peak_2173	chr3	105091156	105091656	198	39.6	MACS_peak_2173	chr3	105091122	105091689	111.8	chr3-105091458-105092006	40.7407
chr3-64821298-64822011	chr3	64821298	64822011	TGTGGTGTGGGCGTGGA;CGCTCGGCCCAAGATAG	4.22205	9.4688e-56	MACS_peak_2123	chr3	64821118	64822918	713	39.6111	MACS_peak_2123	chr3	64821081	64822955	121.49	chr3-64821298-64822011	38.047
chr3-63995607-63996123	chr3	63995607	63996123	TGTCCGCGCGGGGGTCC	0.200478	0.626804	MACS_peak_2121	chr3	63995558	63996858	516	39.6923	MACS_peak_2121	chr3	63995518	63996897	66.06	chr3-63995607-63996123	37.4184
chr20-53365682-53366199	chr20	53365682	53366199	GGTCGGGGCATGGGCCG	0.395529	0.446007	MACS_peak_1959	chr20	53365088	53366388	517	39.7692	MACS_peak_1959	chr20	53365044	53366431	65.2	chr20-53365682-53366199	37.2747
chr8-133037050-133037672	chr8	133037050	133037672	GGGGGTATATTGGCAAA	4.12944	7.72689e-31	MACS_peak_3421	chr8	133037473	133037973	199	39.8	MACS_peak_3421	chr8	133037443	133038003	155.19	chr8-133037050-133037672	40.8929
chr7-136912642-136913205	chr7	136912642	136913205	CCACAGAACACTCCCGC	-0.213584	0.770509	MACS_peak_3214	chr7	136912341	136912841	199	39.8	MACS_peak_3214	chr7	136912493	136912689	80.93	chr7-136912642-136913205	23.9796
chr5-42094277-42094854	chr5	42094277	42094854	AAAGGTGGTGGGCGGTA;TAGCAGCGTCCAGATGA	0.129452	0.368316	MACS_peak_2507	chr5	42094655	42095155	199	39.8	MACS_peak_2507	chr5	42094813	42094997	60.66	chr5-42094277-42094854	22.2826
chr4-153180356-153180998	chr4	153180356	153180998	CTCCTGGCCTACGCTAC	0.794792	0.0294811	MACS_peak_2409	chr4	153180055	153180555	199	39.8	MACS_peak_2409	chr4	153180074	153180536	93.5	chr4-153180356-153180998	38.961
chr3-153016-153680	chr3	153016	153680	CGTTATGGTCCGCGTGT	0.404213	0.572054	MACS_peak_2036	chr3	152715	153215	199	39.8	MACS_peak_2036	chr3	152680	153249	260.32	chr3-153016-153680	40.949
chr1-107364512-107365039	chr1	107364512	107365039	AGGGAGGGCGGCGGTGG	0.134713	0.782001	MACS_peak_99	chr1	107363910	107364910	398	39.8	MACS_peak_99	chr1	107363877	107364942	66.63	chr1-107364512-107365039	40.3756
chr1-199917690-199918297	chr1	199917690	199918297	GCTGCAGCGAACTGAGA	-0.352285	0.509121	MACS_peak_239	chr1	199918058	199918658	239	39.8333	MACS_peak_239	chr1	199918008	199918707	501.18	chr1-199917690-199918297	41.3448
chr20-53396277-53397075	chr20	53396277	53397075	GAGGGGTGGGTATAAGT;GGAGATGGTTGGCGGGT	-0.211674	0.801223	MACS_peak_1960	chr20	53396079	53398079	798	39.9	MACS_peak_1960	chr20	53396048	53398110	79.03	chr20-53396277-53397075	38.7003
chr1-181104415-181104936	chr1	181104415	181104936	ATGTGCTGACTTTGGTG	0.0221457	0.962892	MACS_peak_185	chr1	181103754	181104854	439	39.9091	MACS_peak_185	chr1	181103720	181104888	3100	chr1-181104415-181104936	40.4966
chr20-53365220-53365739	chr20	53365220	53365739	GTGGTAACACTGCCGGG	0.197333	0.499099	MACS_peak_1959	chr20	53365088	53366388	519	39.9231	MACS_peak_1959	chr20	53365044	53366431	65.2	chr20-53365220-53365739	37.4189
chrX-16863019-16863571	chrX	16863019	16863571	GGTTGGCCTGCAGCGCG	0.314382	0.567041	MACS_peak_3584	chrX	16862719	16863219	200	40	MACS_peak_3584	chrX	16862710	16863228	113	chrX-16863019-16863571	40.3475
chr6-64283673-64284338	chr6	64283673	64284338	CCCAGACGGACCTCGCG	0.174508	0.770769	MACS_peak_2926	chr6	64283313	64283913	240	40	MACS_peak_2926	chr6	64283280	64283946	273.58	chr6-64283673-64284338	40.991
chr6-18326558-18327053	chr6	18326558	18327053	CACGTTTGGGTGCGGAA	-1.0881	0.0153149	MACS_peak_2850	chr6	18326258	18326758	200	40	MACS_peak_2850	chr6	18326320	18326695	202.02	chr6-18326558-18327053	36.5333
chr5-66390015-66390821	chr5	66390015	66390821	TGGGCGTCAAAGTTGGT;CCGCATGTATATGTAGG	0.209069	0.864132	MACS_peak_2609	chr5	66390621	66391121	200	40	MACS_peak_2609	chr5	66390613	66391128	158.1	chr5-66390015-66390821	40.3883
chr3-78836394-78836951	chr3	78836394	78836951	CGACGGATACAGTTCAC	0.356974	0.605906	MACS_peak_2139	chr3	78836094	78836594	200	40	MACS_peak_2139	chr3	78836264	78836423	66.04	chr3-78836394-78836951	18.239
chr20-53396237-53397037	chr20	53396237	53397037	TTTGGGTAGTAGGAAAT;TCTGGTCCGTGTCGGGA	0.489889	0.0485256	MACS_peak_1960	chr20	53396079	53398079	800	40	MACS_peak_1960	chr20	53396048	53398110	79.03	chr20-53396237-53397037	38.7973
chr2-56351234-56351750	chr2	56351234	56351750	GACAGCCCTTTACATGT	-0.483035	0.187739	MACS_peak_1641	chr2	56350934	56351434	200	40	MACS_peak_1641	chr2	56351097	56351270	61.34	chr2-56351234-56351750	20.8092
chr17-54124640-54125243	chr17	54124640	54125243	TTGGTATAGGGTTCAGG	0.279452	0.689303	MACS_peak_1306	chr17	54124340	54124840	200	40	MACS_peak_1306	chr17	54124501	54124678	62.04	chr17-54124640-54125243	21.4689
chr10-9166224-9166768	chr10	9166224	9166768	TGAGGGTGCGACTCGCA	0.536127	0.0646833	MACS_peak_310	chr10	9166568	9167068	200	40	MACS_peak_310	chr10	9166654	9166981	64.74	chr10-9166224-9166768	34.8624
chr5-69068550-69069162	chr5	69068550	69069162	AAATAGTTCTGATGTGT	-0.682783	0.0284154	neg_region_50	chr5	69068250	69068750	200	40	no_overlap	.	.	.	.	.	.
chr3-195315447-195315970	chr3	195315447	195315970	GGAAAGCTGCAGAATCG	0.289126	0.399643	MACS_peak_498638	chr3	195315147	195315647	200	40	no_overlap	.	.	.	.	.	.
chr3-195315447-195315966	chr3	195315447	195315966	AGACCGGGGGTACGGGC;GTCTACTGCAGTGATAG	-0.248211	0.709427	MACS_peak_498638	chr3	195315147	195315647	200	40	no_overlap	.	.	.	.	.	.
chr14-39493244-39493786	chr14	39493244	39493786	GATGCAGGCCGAGGTCA	0.463104	0.442912	MACS_peak_890	chr14	39492915	39493465	221	40.1818	MACS_peak_890	chr14	39492886	39493493	175.14	chr14-39493244-39493786	41.0214
chr9-125313315-125313788	chr9	125313315	125313788	TAGAATTCCGCGGCGGG	0.572259	0.222959	MACS_peak_3551	chr9	125313587	125314087	201	40.2	MACS_peak_3551	chr9	125313647	125314027	60.2	chr9-125313315-125313788	37.1053
chr5-172719043-172719547	chr5	172719043	172719547	TCGAAGTGGGGCGGTAG	-0.0583807	0.959096	MACS_peak_2814	chr5	172719346	172719846	201	40.2	MACS_peak_2814	chr5	172719307	172719884	208.73	chr5-172719043-172719547	41.5945
chr5-143570126-143570592	chr5	143570126	143570592	GGGTCGAAGGTAACAGG	0.309549	0.475135	MACS_peak_2766	chr5	143569827	143570327	201	40.2	MACS_peak_2766	chr5	143569954	143570200	62.01	chr5-143570126-143570592	30.0813
chr5-43080956-43081447	chr5	43080956	43081447	TATGGGGGAGGCCTGGG	-0.54523	0.383632	MACS_peak_2526	chr5	43080657	43081157	201	40.2	MACS_peak_2526	chr5	43080724	43081089	69.19	chr5-43080956-43081447	36.4384
chr22-22107024-22107742	chr22	22107024	22107742	CCTCACTGATGTTCGCA	0.391589	0.0775249	MACS_peak_1998	chr22	22107541	22108041	201	40.2	MACS_peak_1998	chr22	22107676	22107906	66.4	chr22-22107024-22107742	28.6957
chr20-53365688-53366211	chr20	53365688	53366211	AATACGTAGCCAAGTCC	-0.0593918	0.907704	MACS_peak_1959	chr20	53365088	53366388	523	40.2308	MACS_peak_1959	chr20	53365044	53366431	65.2	chr20-53365688-53366211	37.7073
chr20-53365865-53366553	chr20	53365865	53366553	GTAATGCGGTGCTTAAG	-0.276947	0.583939	MACS_peak_1959	chr20	53365088	53366388	523	40.2308	MACS_peak_1959	chr20	53365044	53366431	65.2	chr20-53365865-53366553	40.8075
chr20-52937511-52938512	chr20	52937511	52938512	ATGAGCTAACTCGCCGC	-0.162135	0.725925	MACS_peak_1954	chr20	52937123	52937773	262	40.3077	MACS_peak_1954	chr20	52937097	52937798	63.93	chr20-52937511-52938512	40.9415
chr8-143896323-143897136	chr8	143896323	143897136	GGGAGACCGCGAAGGCG	0.141115	0.798878	MACS_peak_3434	chr8	143896753	143897703	383	40.3158	MACS_peak_3434	chr8	143896726	143897730	973.53	chr8-143896323-143897136	40.8367
chr20-46292904-46293863	chr20	46292904	46293863	GGAAAGCTTATCGGAAT	-0.501439	0.478333	MACS_peak_1944	chr20	46293278	46294728	585	40.3448	MACS_peak_1944	chr20	46293241	46294765	76.16	chr20-46292904-46293863	40.8136
chr3-63995770-63996295	chr3	63995770	63996295	GTCGCGGGGGAAGCTAG	-0.176009	0.829492	MACS_peak_2121	chr3	63995558	63996858	525	40.3846	MACS_peak_2121	chr3	63995518	63996897	66.06	chr3-63995770-63996295	38.0711
chr5-55279865-55280658	chr5	55279865	55280658	CGGTCGTTCAGATCGGG	0.280189	0.605906	MACS_peak_2591	chr5	55280456	55280956	202	40.4	MACS_peak_2591	chr5	55280590	55280822	65.11	chr5-55279865-55280658	29.3103
chr5-43164142-43164699	chr5	43164142	43164699	TCACTCGTAGGGAGGCG	-0.305325	0.377999	MACS_peak_2528	chr5	43164497	43164997	202	40.4	MACS_peak_2528	chr5	43164610	43164883	62.39	chr5-43164142-43164699	32.6007
chr14-105236004-105236566	chr14	105236004	105236566	ACTTGCGAAAGCCTTGA	0.225364	0.508792	MACS_peak_994	chr14	105235706	105236206	202	40.4	MACS_peak_994	chr14	105235811	105236100	65.62	chr14-105236004-105236566	33.218
chr14-96991066-96991624	chr14	96991066	96991624	AGGAACGGAGGCCCAAA	0.562925	0.297695	MACS_peak_977	chr14	96991422	96991922	202	40.4	MACS_peak_977	chr14	96991591	96991753	66.04	chr14-96991066-96991624	20.3704
chr10-90695135-90695772	chr10	90695135	90695772	GGGGGTATGCACGCTAG;GGACTATGGTGGCGGCC	1.0329	1.40636e-07	MACS_peak_389	chr10	90694837	90695337	202	40.4	MACS_peak_389	chr10	90695019	90695155	198.31	chr10-90695135-90695772	14.7059
chr1-181490488-181491016	chr1	181490488	181491016	CATGAGTATTTCTGAAG	-0.324141	0.282335	MACS_peak_188	chr1	181490753	181491403	263	40.4615	MACS_peak_188	chr1	181490716	181491440	346.46	chr1-181490488-181491016	41.4365
chr17-59698413-59699426	chr17	59698413	59699426	GTGGGCGTGGGGTTAGT	-0.439473	0.309389	MACS_peak_1334	chr17	59698351	59700851	1013	40.52	MACS_peak_1334	chr17	59698322	59700879	82.32	chr17-59698413-59699426	39.6167
chr6-101327746-101328856	chr6	101327746	101328856	GGTGGCCATACGACGGG	2.96046	3.21404e-17	MACS_peak_3003	chr6	101328653	101329153	203	40.6	MACS_peak_3003	chr6	101328695	101329110	65.5	chr6-101327746-101328856	38.7952
chr3-6173838-6174598	chr3	6173838	6174598	GCGAGGGTACTGAAGCA	0.117922	0.768263	MACS_peak_2054	chr3	6174395	6174895	203	40.6	MACS_peak_2054	chr3	6174576	6174713	71.93	chr3-6173838-6174598	16.0584
chr2-56351231-56351880	chr2	56351231	56351880	GTGAGGCTGGGTCCACC	-0.347696	0.610156	MACS_peak_1641	chr2	56350934	56351434	203	40.6	MACS_peak_1641	chr2	56351097	56351270	61.34	chr2-56351231-56351880	22.5434
chr16-78833048-78833977	chr16	78833048	78833977	CAGAACGGTTTGGAGGT	0.80151	0.032679	MACS_peak_1220	chr16	78833774	78834274	203	40.6	MACS_peak_1220	chr16	78833950	78834097	66.3	chr16-78833048-78833977	18.3673
chr12-91211053-91211608	chr12	91211053	91211608	TTTTGTCGTATCAACAT	-0.219718	0.674299	MACS_peak_761	chr12	91210756	91211256	203	40.6	MACS_peak_761	chr12	91210898	91211113	68.83	chr12-91211053-91211608	27.907
chr1-220509381-220509988	chr1	220509381	220509988	CGACTGTTACAGGTTGG;GCAGAGCGTTCATTTCT;TGATAAGAGGCGGGCTC	2.52907	1.49319e-48	MACS_peak_274	chr1	220509785	220510285	203	40.6	MACS_peak_274	chr1	220509842	220510228	85.24	chr1-220509381-220509988	37.8238
chr3-63995950-63996478	chr3	63995950	63996478	GGTGGAAGTGGTGCGGG	0.147236	0.61906	MACS_peak_2121	chr3	63995558	63996858	528	40.6154	MACS_peak_2121	chr3	63995518	63996897	66.06	chr3-63995950-63996478	38.2886
chr3-64770128-64770928	chr3	64770128	64770928	CAGGGGAAGGCAGAGGG	-0.185649	0.768031	MACS_peak_2122	chr3	64770603	64771403	325	40.625	MACS_peak_2122	chr3	64770575	64771431	100.22	chr3-64770128-64770928	41.2383
chr20-53365463-53365992	chr20	53365463	53365992	TGGACCGGGCCAGGTGT;TCCGGTGAGTAGCGGGG	-0.2856	0.744644	MACS_peak_1959	chr20	53365088	53366388	529	40.6923	MACS_peak_1959	chr20	53365044	53366431	65.2	chr20-53365463-53365992	38.1399
chr20-53365734-53366263	chr20	53365734	53366263	TACTAAAGTAAGTTAGA	-0.691531	0.208489	MACS_peak_1959	chr20	53365088	53366388	529	40.6923	MACS_peak_1959	chr20	53365044	53366431	65.2	chr20-53365734-53366263	38.1399
chr3-63995407-63996088	chr3	63995407	63996088	CAGCGGCGGTGAAGGGA	0.887528	0.00523576	MACS_peak_2121	chr3	63995558	63996858	530	40.7692	MACS_peak_2121	chr3	63995518	63996897	66.06	chr3-63995407-63996088	41.3343
chr20-52936843-52937388	chr20	52936843	52937388	CGGGAGCGTGGCAGGTA	0.040615	0.932562	MACS_peak_1954	chr20	52937123	52937773	265	40.7692	MACS_peak_1954	chr20	52937097	52937798	63.93	chr20-52936843-52937388	41.5121
chr17-59362296-59362867	chr17	59362296	59362867	TGGGGCCCTGCAGGAGG	-0.0146961	0.9757	MACS_peak_1330	chr17	59361548	59362948	571	40.7857	MACS_peak_1330	chr17	59361518	59362977	204.92	chr17-59362296-59362867	39.1364
chr14-51575069-51575273	chr14	51575069	51575273	TGTTAAGAGACAGTATC	0.151244	0.850662	MACS_peak_907	chr14	51574816	51575316	204	40.8	MACS_peak_907	chr14	51574984	51575147	66.04	chr14-51575069-51575273	47.8528
chr3-64770364-64770930	chr3	64770364	64770930	GCAAGAGGAGATGTCTG	0.669717	0.382018	MACS_peak_2122	chr3	64770603	64771403	327	40.875	MACS_peak_2122	chr3	64770575	64771431	100.22	chr3-64770364-64770930	41.472
chr20-53365856-53366476	chr20	53365856	53366476	AGGGCGCGGGCGAGCGA	-0.546766	0.0677327	MACS_peak_1959	chr20	53365088	53366388	532	40.9231	MACS_peak_1959	chr20	53365044	53366431	65.2	chr20-53365856-53366476	41.4564
chr9-123943851-123944507	chr9	123943851	123944507	CACTTAATGCAGCTGAA	-1.29519	0.0102124	MACS_peak_3547	chr9	123943556	123944056	205	41	MACS_peak_3547	chr9	123943655	123943956	60.78	chr9-123943851-123944507	34.8837
chr5-42094130-42094860	chr5	42094130	42094860	CTCGTTGAGGCAGTGTA	0.0664482	0.894635	MACS_peak_2507	chr5	42094655	42095155	205	41	MACS_peak_2507	chr5	42094813	42094997	60.66	chr5-42094130-42094860	25.5435
chr4-166747114-166747722	chr4	166747114	166747722	AGGAACGGGGGGGCCGG	0.0889489	0.856802	MACS_peak_2420	chr4	166747517	166748017	205	41	MACS_peak_2420	chr4	166747678	166747855	64.35	chr4-166747114-166747722	24.8588
chr15-73457560-73458319	chr15	73457560	73458319	GGATGCAAAGATATACC	3.27256	6.09111e-15	MACS_peak_1086	chr15	73458052	73458702	267	41.0769	MACS_peak_1086	chr15	73458002	73458751	418.91	chr15-73457560-73458319	42.3231
chr8-31333102-31334202	chr8	31333102	31334202	CTATCGGCGACGCGCAG	-0.462223	0.319542	MACS_peak_3292	chr8	31333996	31334496	206	41.2	MACS_peak_3292	chr8	31334184	31334307	90.05	chr8-31333102-31334202	14.6341
chr17-58922909-58923472	chr17	58922909	58923472	CCGGGAGTAGGCGGGGA	1.5656	0.000307686	MACS_peak_1329	chr17	58922615	58923115	206	41.2	MACS_peak_1329	chr17	58922583	58923147	177.8	chr17-58922909-58923472	42.1986
chr9-43176394-43176887	chr9	43176394	43176887	TCACGGAGGACTTACTG	-0.00555112	0.993501	neg_region_43	chr9	43176100	43176600	206	41.2	no_overlap	.	.	.	.	.	.
chr20-53365655-53366191	chr20	53365655	53366191	TGGGGGCTAACGTTGCA	-0.398067	0.184657	MACS_peak_1959	chr20	53365088	53366388	536	41.2308	MACS_peak_1959	chr20	53365044	53366431	65.2	chr20-53365655-53366191	38.6446
chr20-53396324-53397150	chr20	53396324	53397150	TTCAAGAGTGATGTGGT;CCCCAAAAACTATGGGG	-0.122004	0.594439	MACS_peak_1960	chr20	53396079	53398079	826	41.3	MACS_peak_1960	chr20	53396048	53398110	79.03	chr20-53396324-53397150	40.0582
chr20-46293174-46293877	chr20	46293174	46293877	GACGAGCGCACATGTGA	0.457819	0.450384	MACS_peak_1944	chr20	46293278	46294728	599	41.3103	MACS_peak_1944	chr20	46293241	46294765	76.16	chr20-46293174-46293877	41.7323
chr8-103249154-103249831	chr8	103249154	103249831	CTGTTGTGTGTGTAAGG;GTCCGACCCAAGAGAGA	0.0799362	0.954815	MACS_peak_3342	chr8	103248626	103249526	372	41.3333	MACS_peak_3342	chr8	103248582	103249570	623.71	chr8-103249154-103249831	42.1053
chr5-40601485-40601742	chr5	40601485	40601742	CGCTGATGGCCTTACCC	2.93053	3.67912e-20	MACS_peak_2490	chr5	40601192	40601692	207	41.4	MACS_peak_2490	chr5	40601222	40601661	172.23	chr5-40601485-40601742	40.0911
chr17-68685039-68685561	chr17	68685039	68685561	CATAGTTTCTGACTGGA	0.0243274	0.977318	MACS_peak_1370	chr17	68685354	68685854	207	41.4	MACS_peak_1370	chr17	68685490	68685718	60.97	chr17-68685039-68685561	31.1404
chr20-53396117-53396946	chr20	53396117	53396946	AAGTGGAAGCAGGGGGT	0.0224749	0.972344	MACS_peak_1960	chr20	53396079	53398079	829	41.45	MACS_peak_1960	chr20	53396048	53398110	79.03	chr20-53396117-53396946	40.2037
chr9-68417150-68417756	chr9	68417150	68417756	ATAGGATTCCTGGGACG	0.454909	0.135374	MACS_peak_3463	chr9	68417362	68418312	394	41.4737	MACS_peak_3463	chr9	68417325	68418349	77.53	chr9-68417150-68417756	42.0898
chr20-53365162-53365702	chr20	53365162	53365702	GGGTGAGCGAGGCGGGC	0.664331	0.116832	MACS_peak_1959	chr20	53365088	53366388	540	41.5385	MACS_peak_1959	chr20	53365044	53366431	65.2	chr20-53365162-53365702	38.9329
chr7-33327723-33328223	chr7	33327723	33328223	GTATGGGCATCGTGGTG	-0.395233	0.398641	MACS_peak_3121	chr7	33327314	33328014	291	41.5714	MACS_peak_3121	chr7	33327288	33328039	609.56	chr7-33327723-33328223	42.0772
chr7-140567217-140567849	chr7	140567217	140567849	AATTGTTTGACCATGGG	2.95721	1.13337e-23	MACS_peak_3219	chr7	140567641	140568141	208	41.6	MACS_peak_3219	chr7	140567604	140568178	113.45	chr7-140567217-140567849	42.6829
chr7-81252670-81253575	chr7	81252670	81253575	TCACGCTCTGGGCGACG	4.87845	1.22603e-37	MACS_peak_3162	chr7	81252378	81252878	208	41.6	MACS_peak_3162	chr7	81252434	81252821	95.19	chr7-81252670-81253575	39.0181
chr3-63995833-63996376	chr3	63995833	63996376	TTTCACCTGACCTGACA	0.523433	0.250372	MACS_peak_2121	chr3	63995558	63996858	543	41.7692	MACS_peak_2121	chr3	63995518	63996897	66.06	chr3-63995833-63996376	39.3764
chr3-63995732-63996275	chr3	63995732	63996275	GTGTAGGAGGACCAGAT	0.119159	0.780684	MACS_peak_2121	chr3	63995558	63996858	543	41.7692	MACS_peak_2121	chr3	63995518	63996897	66.06	chr3-63995732-63996275	39.3764
chr20-53365150-53365693	chr20	53365150	53365693	CTTGCGGCGTACTGAAG	0.34112	0.358121	MACS_peak_1959	chr20	53365088	53366388	543	41.7692	MACS_peak_1959	chr20	53365044	53366431	65.2	chr20-53365150-53365693	39.1492
chr6-80397449-80398172	chr6	80397449	80398172	GGTCCTCAAATTATGTA	-0.994882	0.121724	MACS_peak_2963	chr6	80397158	80397658	209	41.8	MACS_peak_2963	chr6	80397253	80397563	71.27	chr6-80397449-80398172	36.7742
chr12-94867231-94867722	chr12	94867231	94867722	CATTGACAGCGGATGGG;CTCAGGGATTGAGGGCC	-0.0943768	0.968471	MACS_peak_770	chr12	94866940	94867440	209	41.8	MACS_peak_770	chr12	94867050	94867329	77.61	chr12-94867231-94867722	35.1254
chr1-181104393-181105426	chr1	181104393	181105426	GGTCATGGGTTTGGGGA	-0.590358	0.176187	MACS_peak_185	chr1	181103754	181104854	461	41.9091	MACS_peak_185	chr1	181103720	181104888	3100	chr1-181104393-181105426	42.3801
chr20-53365843-53366580	chr20	53365843	53366580	TGTGAAGATCGGGATCC	0.0682042	0.892189	MACS_peak_1959	chr20	53365088	53366388	545	41.9231	MACS_peak_1959	chr20	53365044	53366431	65.2	chr20-53365843-53366580	42.3937
chr20-53365143-53365688	chr20	53365143	53365688	ATCTCCGGCGGTTTGAC	-0.13465	0.744447	MACS_peak_1959	chr20	53365088	53366388	545	41.9231	MACS_peak_1959	chr20	53365044	53366431	65.2	chr20-53365143-53365688	39.2934
chr3-64770368-64770939	chr3	64770368	64770939	CCGGGGGTTGTATTTGG	-0.386853	0.665039	MACS_peak_2122	chr3	64770603	64771403	336	42	MACS_peak_2122	chr3	64770575	64771431	100.22	chr3-64770368-64770939	42.5234
chr12-92296861-92297400	chr12	92296861	92297400	TATGGCAGCAAGGGGGG	2.15772	5.88314e-13	MACS_peak_763	chr12	92296571	92297071	210	42	MACS_peak_763	chr12	92296577	92297064	101.92	chr12-92296861-92297400	41.6838
chr12-56119416-56119928	chr12	56119416	56119928	TCTGCAGCGGGTCCGGT	1.62988	4.38136e-05	MACS_peak_657	chr12	56119718	56120218	210	42	MACS_peak_657	chr12	56119870	56120066	63.06	chr12-56119416-56119928	29.5918
chr8-128807235-128807808	chr8	128807235	128807808	CGGTCTCTCATTTCGTT	0.281423	0.402855	MACS_peak_3412	chr8	128807345	128808445	463	42.0909	MACS_peak_3412	chr8	128807314	128808476	189.13	chr8-128807235-128807808	42.5129
chr17-59362358-59362965	chr17	59362358	59362965	GGGTACGCTTTGTAGGG	0.101978	0.869963	MACS_peak_1330	chr17	59361548	59362948	590	42.1429	MACS_peak_1330	chr17	59361518	59362977	204.92	chr17-59362358-59362965	41.6038
chr8-128807266-128807809	chr8	128807266	128807809	TCCTTTTCAGCTGATGT;GTGTTACATATTTTTGG	-0.343652	0.255162	MACS_peak_3412	chr8	128807345	128808445	464	42.1818	MACS_peak_3412	chr8	128807314	128808476	189.13	chr8-128807266-128807809	42.599
chr8-120257049-120257530	chr8	120257049	120257530	GCCCGGGCTATCCGCGA	0.437363	0.101306	MACS_peak_3392	chr8	120257319	120257819	211	42.2	MACS_peak_3392	chr8	120257295	120257843	122.08	chr8-120257049-120257530	42.8832
chr6-122961082-122961580	chr6	122961082	122961580	TCGCTCTACGGGTAGGT	-0.562651	0.219881	MACS_peak_3034	chr6	122961369	122961869	211	42.2	MACS_peak_3034	chr6	122961437	122961800	120.31	chr6-122961082-122961580	39.3939
chr1-72466694-72467393	chr1	72466694	72467393	GCCGTGTCGATGGGATC	0.539252	0.0205581	MACS_peak_78	chr1	72466405	72466905	211	42.2	MACS_peak_78	chr1	72466447	72466863	122.21	chr1-72466694-72467393	40.625
chr17-59699472-59700530	chr17	59699472	59700530	TTTGGGCAGAACAAGGG	1.92587	1.81938e-12	MACS_peak_1334	chr17	59698351	59700851	1058	42.32	MACS_peak_1334	chr17	59698322	59700879	82.32	chr17-59699472-59700530	41.3766
chr8-128807235-128807811	chr8	128807235	128807811	TTAGTAGGGGGGGTAAG	-0.599337	0.160491	MACS_peak_3412	chr8	128807345	128808445	466	42.3636	MACS_peak_3412	chr8	128807314	128808476	189.13	chr8-128807235-128807811	42.7711
chrX-11960181-11961111	chrX	11960181	11961111	ACACGCGGTGCACCCAG	-0.799181	0.113782	MACS_peak_3581	chrX	11960899	11961399	212	42.4	MACS_peak_3581	chrX	11961056	11961242	62.75	chrX-11960181-11961111	29.5699
chr5-43164215-43164709	chr5	43164215	43164709	GGGGAACGTAACCCGGG	0.0769018	0.876478	MACS_peak_2528	chr5	43164497	43164997	212	42.4	MACS_peak_2528	chr5	43164610	43164883	62.39	chr5-43164215-43164709	36.2637
chr12-62830135-62830468	chr12	62830135	62830468	GGTCGTGGGAAGCGTGT;TGTGTGTGTGGGCGAGT	-0.079806	0.951905	MACS_peak_685	chr12	62829847	62830347	212	42.4	MACS_peak_685	chr12	62829862	62830332	60.86	chr12-62830135-62830468	41.9149
chr20-46621931-46622505	chr20	46621931	46622505	GTGCCTCCGTGCACCGG	4.13446	1.20494e-38	MACS_peak_1946	chr20	46621298	46622398	467	42.4545	MACS_peak_1946	chr20	46621272	46622423	730.37	chr20-46621931-46622505	42.7454
chr20-52936874-52937399	chr20	52936874	52937399	TATTAAGGGTGGAGGGG	-0.560847	0.16676	MACS_peak_1954	chr20	52937123	52937773	276	42.4615	MACS_peak_1954	chr20	52937097	52937798	63.93	chr20-52936874-52937399	43.0813
chr17-59362353-59363103	chr17	59362353	59363103	AAATCGGGTGGCTGGCA	0.501698	0.42002	MACS_peak_1330	chr17	59361548	59362948	595	42.5	MACS_peak_1330	chr17	59361518	59362977	204.92	chr17-59362353-59363103	42.769
chr8-127526468-127527057	chr8	127526468	127527057	TCGGTGGACGGATCGTA	0.767022	0.043529	MACS_peak_3410	chr8	127526181	127526681	213	42.6	MACS_peak_3410	chr8	127526255	127526606	72.5	chr8-127526468-127527057	39.3162
chr7-40882884-40883456	chr7	40882884	40883456	GAGGTACGGGCAGGAGC	2.37709	1.76726e-14	MACS_peak_3126	chr7	40883243	40883743	213	42.6	MACS_peak_3126	chr7	40883308	40883677	79.37	chr7-40882884-40883456	40.1084
chr5-43905732-43906519	chr5	43905732	43906519	GTGGGGTTCATGGGGAC	0.319432	0.468677	MACS_peak_2549	chr5	43906306	43906806	213	42.6	MACS_peak_2549	chr5	43906314	43906797	73.58	chr5-43905732-43906519	42.4431
chr3-191245352-191245953	chr3	191245352	191245953	CAGGGGCCGGGAGGATG	0.122858	0.729327	MACS_peak_2244	chr3	191245740	191246240	213	42.6	MACS_peak_2244	chr3	191245870	191246110	64.88	chr3-191245352-191245953	34.5833
chr3-33110401-33110890	chr3	33110401	33110890	AACCGCAATGGCCGCGC	-0.334306	0.592749	MACS_peak_2102	chr3	33110114	33110614	213	42.6	MACS_peak_2102	chr3	33110233	33110495	63.36	chr3-33110401-33110890	35.8779
chr2-141322005-141322566	chr2	141322005	141322566	AAACCTTAGGACTCACA	-0.0223793	0.976506	MACS_peak_1732	chr2	141321718	141322218	213	42.6	MACS_peak_1732	chr2	141321824	141322112	68.33	chr2-141322005-141322566	37.1528
chr12-98988918-98989528	chr12	98988918	98989528	TCGTCCGGAGCCATTAA	0.0731935	0.92296	MACS_peak_774	chr12	98989315	98989815	213	42.6	MACS_peak_774	chr12	98989469	98989660	86.04	chr12-98988918-98989528	30.8901
chr17-59362042-59362640	chr17	59362042	59362640	GAGAATAGCCGGGTGGT	4.11982	1.3943e-32	MACS_peak_1330	chr17	59361548	59362948	598	42.7143	MACS_peak_1330	chr17	59361518	59362977	204.92	chr17-59362042-59362640	40.987
chr17-59361700-59362298	chr17	59361700	59362298	GTGCAGGGTTTCGATCG	3.39265	8.36536e-21	MACS_peak_1330	chr17	59361548	59362948	598	42.7143	MACS_peak_1330	chr17	59361518	59362977	204.92	chr17-59361700-59362298	40.987
chr3-63995444-63996114	chr3	63995444	63996114	GGAACTTTTTGTACAGG	-0.063466	0.944878	MACS_peak_2121	chr3	63995558	63996858	556	42.7692	MACS_peak_2121	chr3	63995518	63996897	66.06	chr3-63995444-63996114	43.2197
chr16-4190875-4191339	chr16	4190875	4191339	CTCACAATGTGTGATTG	3.29197	5.45903e-20	MACS_peak_1125	chr16	4190589	4191089	214	42.8	MACS_peak_1125	chr16	4190561	4191117	781.79	chr16-4190875-4191339	43.5252
chr15-55650468-55651019	chr15	55650468	55651019	GGCGGGTTCGGGGGTGC	-0.177642	0.674803	MACS_peak_1050	chr15	55650805	55651305	214	42.8	MACS_peak_1050	chr15	55650871	55651239	66.09	chr15-55650468-55651019	40.2174
chr1-216540654-216541240	chr1	216540654	216541240	GTAGGGGGGGAAGACGG;GGAGGTTTACGCAGGGA	-0.113017	0.916954	MACS_peak_265	chr1	216540368	216540868	214	42.8	MACS_peak_265	chr1	216540439	216540797	62.37	chr1-216540654-216541240	39.9441
chr16-81068640-81069272	chr16	81068640	81069272	GGTGTGGCGTTAAATCG;GGACAGCGTTCGTGGGG	0.230579	0.667975	ATMIN	chr16	81069058	81069558	214	42.8	no_overlap	.	.	.	.	.	.
chr8-128807972-128808473	chr8	128807972	128808473	GACCGGGTGGGACTCGA	3.58317	1.17011e-17	MACS_peak_3412	chr8	128807345	128808445	473	43	MACS_peak_3412	chr8	128807314	128808476	189.13	chr8-128807972-128808473	43.1153
chr2-54045519-54045990	chr2	54045519	54045990	AGGCGATGGCTTGGGGA	0.080646	0.914681	MACS_peak_1636	chr2	54045775	54046275	215	43	MACS_peak_1636	chr2	54045901	54046148	62.87	chr2-54045519-54045990	36.0324
chr16-86159065-86159589	chr16	86159065	86159589	ACGCGGGGCGGGCTGGT	2.738	2.95464e-16	MACS_peak_1239	chr16	86158780	86159280	215	43	MACS_peak_1239	chr16	86158883	86159176	70.08	chr16-86159065-86159589	37.884
chr22-29190546-29191134	chr22	29190546	29191134	GGAACATCGTTGTGGTT	-0.484694	0.253467	MACS_peak_2007	chr22	29190768	29191618	366	43.0588	MACS_peak_2007	chr22	29190720	29191665	439.82	chr22-29190546-29191134	43.8095
chr3-63995552-63996118	chr3	63995552	63996118	AAGTATGCAAGACCCGA	0.80355	9.21793e-05	MACS_peak_2121	chr3	63995558	63996858	560	43.0769	MACS_peak_2121	chr3	63995518	63996897	66.06	chr3-63995552-63996118	41.0442
chr20-52937493-52937993	chr20	52937493	52937993	CGCTGTCTGGGGGCTGG	0.00735077	0.993594	MACS_peak_1954	chr20	52937123	52937773	280	43.0769	MACS_peak_1954	chr20	52937097	52937798	63.93	chr20-52937493-52937993	43.5093
chr1-107364363-107364794	chr1	107364363	107364794	GAAGGGAAGTATACAAG	0.0523641	0.89714	MACS_peak_99	chr1	107363910	107364910	431	43.1	MACS_peak_99	chr1	107363877	107364942	66.63	chr1-107364363-107364794	40.4695
chr8-124856561-124857101	chr8	124856561	124857101	TACAGGATCCCACGGGG	0.795426	0.00016442	MACS_peak_3402	chr8	124856559	124857809	540	43.2	MACS_peak_3402	chr8	124856525	124857842	647.49	chr8-124856561-124857101	41.0023
chr5-43906590-43907093	chr5	43906590	43907093	GACGGAGAATAATTGGG	-0.086239	0.876978	MACS_peak_2549	chr5	43906306	43906806	216	43.2	MACS_peak_2549	chr5	43906314	43906797	73.58	chr5-43906590-43907093	42.8571
chr1-93688381-93689072	chr1	93688381	93689072	AGATGAGTTACGTTCTG;GCTCGAGAAGCCCTTTA	4.21992	2.19562e-44	MACS_peak_88	chr1	93688856	93689356	216	43.2	MACS_peak_88	chr1	93688938	93689273	103.21	chr1-93688381-93689072	40
chr20-52823634-52824202	chr20	52823634	52824202	GTAGGTAGTGTACAGCT	-0.16092	0.848649	PFDN4	chr20	52823986	52824486	216	43.2	no_overlap	.	.	.	.	.	.
chr17-59362031-59362636	chr17	59362031	59362636	CCTTCGTTAGTACAGCT	4.17039	6.81749e-37	MACS_peak_1330	chr17	59361548	59362948	605	43.2143	MACS_peak_1330	chr17	59361518	59362977	204.92	chr17-59362031-59362636	41.4668
chr20-46621470-46621947	chr20	46621470	46621947	GCGCTCAAGAAGGCTAC	-0.425249	0.137334	MACS_peak_1946	chr20	46621298	46622398	477	43.3636	MACS_peak_1946	chr20	46621272	46622423	730.37	chr20-46621470-46621947	41.4422
chr3-63996095-63996659	chr3	63996095	63996659	ACGGGGCAGGTCTCCCG	0.0449718	0.911395	MACS_peak_2121	chr3	63995558	63996858	564	43.3846	MACS_peak_2121	chr3	63995518	63996897	66.06	chr3-63996095-63996659	40.8992
chr7-110238000-110238835	chr7	110238000	110238835	GCGGAGACCTTCCCATG	0.306935	0.637161	MACS_peak_3189	chr7	110237717	110238217	217	43.4	MACS_peak_3189	chr7	110237839	110238095	73	chr7-110238000-110238835	37.1094
chr4-176073714-176074418	chr4	176073714	176074418	ATAACTGCGGGAGGGGT	-0.440236	0.127651	MACS_peak_2431	chr4	176074201	176074701	217	43.4	MACS_peak_2431	chr4	176074339	176074563	61.6	chr4-176073714-176074418	35.2679
chr16-73446475-73447038	chr16	73446475	73447038	AGGGGTCTTCACACGTG;TGGACTTGCCGCCGGGT	0.817358	0.0101502	MACS_peak_1188	chr16	73446821	73447321	217	43.4	MACS_peak_1188	chr16	73446947	73447194	65.43	chr16-73446475-73447038	36.8421
chr20-53396122-53396991	chr20	53396122	53396991	TATTGAGAGGTACGGGA	-0.125775	0.774818	MACS_peak_1960	chr20	53396079	53398079	869	43.45	MACS_peak_1960	chr20	53396048	53398110	79.03	chr20-53396122-53396991	42.1435
chr1-153579857-153580431	chr1	153579857	153580431	GGTCTTAATGCGGTGTA	-0.259174	0.790158	MACS_peak_138	chr1	153579433	153580183	326	43.4667	MACS_peak_138	chr1	153579392	153580223	167.76	chr1-153579857-153580431	44.0433
chr20-53365798-53366364	chr20	53365798	53366364	GTATTCTGTGGGGCAAG	1.06177	2.08149e-08	MACS_peak_1959	chr20	53365088	53366388	566	43.5385	MACS_peak_1959	chr20	53365044	53366431	65.2	chr20-53365798-53366364	40.8075
chr20-53396356-53397227	chr20	53396356	53397227	GCAATGGCCGATATCCT	0.23347	0.619543	MACS_peak_1960	chr20	53396079	53398079	871	43.55	MACS_peak_1960	chr20	53396048	53398110	79.03	chr20-53396356-53397227	42.2405
chr17-59362338-59362974	chr17	59362338	59362974	TAGAGGAGCAGATATAA	-0.268783	0.309093	MACS_peak_1330	chr17	59361548	59362948	610	43.5714	MACS_peak_1330	chr17	59361518	59362977	204.92	chr17-59362338-59362974	43.5915
chr3-195315429-195316264	chr3	195315429	195316264	TAAAGGGGCATGGGCAC	-0.255991	0.680886	MACS_peak_498638	chr3	195315147	195315647	218	43.6	no_overlap	.	.	.	.	.	.
chr20-53365821-53366576	chr20	53365821	53366576	ACCAAGGCCGTATAGGG;CGTTCTCCAGGAGACTG	-0.56124	0.229906	MACS_peak_1959	chr20	53365088	53366388	567	43.6154	MACS_peak_1959	chr20	53365044	53366431	65.2	chr20-53365821-53366576	43.9798
chr5-173755152-173755778	chr5	173755152	173755778	ATAATATGTGGGCTTGT	-0.316224	0.621591	MACS_peak_2816	chr5	173755516	173756116	262	43.6667	MACS_peak_2816	chr5	173755490	173756141	571.4	chr5-173755152-173755778	44.2396
chr2-1177254-1177859	chr2	1177254	1177859	GGGTGGGGCTGGAAAGG	0.341866	0.426232	MACS_peak_1554	chr2	1177640	1178140	219	43.8	MACS_peak_1554	chr2	1177779	1178001	67.68	chr2-1177254-1177859	36.036
chr11-82915418-82915962	chr11	82915418	82915962	GGCTAGGCGTGATTTGG	-0.459433	0.0635194	MACS_peak_555	chr11	82915137	82915637	219	43.8	MACS_peak_555	chr11	82915267	82915507	71.46	chr11-82915418-82915962	37.0833
chr20-53365818-53366641	chr20	53365818	53366641	CTGAGCAGACTCTAGGG	0.252533	0.764131	MACS_peak_1959	chr20	53365088	53366388	570	43.8462	MACS_peak_1959	chr20	53365044	53366431	65.2	chr20-53365818-53366641	44.1961
chr20-53365448-53366019	chr20	53365448	53366019	GGGAAGCTAAGCAGGGG	-0.0752014	0.853796	MACS_peak_1959	chr20	53365088	53366388	571	43.9231	MACS_peak_1959	chr20	53365044	53366431	65.2	chr20-53365448-53366019	41.168
chr7-152879431-152880005	chr7	152879431	152880005	TGTAGAGCGAAATTGGT	0.346902	0.422398	MACS_peak_3249	chr7	152879785	152880285	220	44	MACS_peak_3249	chr7	152879912	152880158	73.49	chr7-152879431-152880005	37.8049
chr7-33327706-33328300	chr7	33327706	33328300	ATATAGTGTTGCTTGTG	0.125288	0.903495	MACS_peak_3121	chr7	33327314	33328014	308	44	MACS_peak_3121	chr7	33327288	33328039	609.56	chr7-33327706-33328300	44.3409
chr7-26235926-26236552	chr7	26235926	26236552	GGGTCAGAGAATAGAGG	-0.0911059	0.788532	MACS_peak_3112	chr7	26236332	26236832	220	44	MACS_peak_3111	chr7	26235984	26236319	183.42	chr7-26235926-26236552	100
chr5-74517485-74517978	chr5	74517485	74517978	GGTAGCAGTGCAGATGA	0.263406	0.561244	MACS_peak_2621	chr5	74517758	74518258	220	44	MACS_peak_2621	chr5	74517921	74518095	64.9	chr5-74517485-74517978	32.7586
chr3-183898872-183899342	chr3	183898872	183899342	TTTGTTATTTGGGGGGT	-0.615137	0.114706	MACS_peak_2238	chr3	183898592	183899092	220	44	MACS_peak_2238	chr3	183898632	183899052	96.39	chr3-183898872-183899342	42.8571
chr3-6173969-6174615	chr3	6173969	6174615	ACTCCGGCCCTAGGATG	0.0436957	0.953841	MACS_peak_2054	chr3	6174395	6174895	220	44	MACS_peak_2054	chr3	6174576	6174713	71.93	chr3-6173969-6174615	28.4672
chr15-49917369-49918024	chr15	49917369	49918024	GACGAATAGAGGAGTGG	-0.395002	0.364355	MACS_peak_1019	chr15	49917672	49918472	352	44	MACS_peak_1019	chr15	49917641	49918502	303.85	chr15-49917369-49918024	44.4832
chr14-24139929-24140447	chr14	24139929	24140447	TTTGTTTTAGTGGCCGG	-0.840641	0.0418528	MACS_peak_872	chr14	24139649	24140149	220	44	MACS_peak_872	chr14	24139606	24140191	258.86	chr14-24139929-24140447	44.7863
chr1-35650075-35650710	chr1	35650075	35650710	TCCCCGGCTAGAGGTAG	0.262176	0.58136	MACS_peak_32	chr1	35649795	35650295	220	44	MACS_peak_32	chr1	35649863	35650226	89.85	chr1-35650075-35650710	41.5978
chr1-115259747-115260308	chr1	115259747	115260308	GACCGGGGGCCTGGATG	0.137014	0.715509	MACS_peak_117	chr1	115259955	115260755	353	44.125	MACS_peak_117	chr1	115259914	115260796	76.41	chr1-115259747-115260308	44.6712
chr9-102842308-102842840	chr9	102842308	102842840	GAGTACAGTTTCGGCCG;AATCTTAAGGGGTAAAT	-0.482072	0.211316	MACS_peak_3505	chr9	102842029	102842529	221	44.2	MACS_peak_3505	chr9	102842171	102842387	68.66	chr9-102842308-102842840	36.5741
chr6-115391835-115392310	chr6	115391835	115392310	TCCGGTTATGCGGTGCG	2.7286	8.19679e-08	MACS_peak_3023	chr6	115392089	115392589	221	44.2	MACS_peak_3023	chr6	115392180	115392498	140.61	chr6-115391835-115392310	40.8805
chr6-65460590-65461109	chr6	65460590	65461109	GTCTGACCTGCAGTCCT	4.70649	6.63418e-43	MACS_peak_2931	chr6	65460888	65461388	221	44.2	MACS_peak_2931	chr6	65460908	65461367	71.11	chr6-65460590-65461109	43.7908
chr5-42839107-42839502	chr5	42839107	42839502	CTGGTGGGGGGATTCTG	-0.160682	0.722513	MACS_peak_2521	chr5	42838828	42839328	221	44.2	MACS_peak_2521	chr5	42838905	42839251	73.44	chr5-42839107-42839502	41.6185
chr2-179886985-179887503	chr2	179886985	179887503	GGTCGTGTTCGGCGACC	0.557299	0.0327826	MACS_peak_1799	chr2	179886706	179887206	221	44.2	MACS_peak_1799	chr2	179886774	179887138	66.62	chr2-179886985-179887503	42.033
chr11-118964308-118964820	chr11	118964308	118964820	AGGGTTCTTGCTGCGAC	0.375041	0.373893	MACS_peak_585	chr11	118964599	118965099	221	44.2	MACS_peak_585	chr11	118964621	118965077	97.95	chr11-118964308-118964820	43.6404
chr11-79714804-79715477	chr11	79714804	79715477	TCGCGGCGGTGGGAACG	0.0736005	0.914681	MACS_peak_544	chr11	79714525	79715025	221	44.2	MACS_peak_544	chr11	79714664	79714885	67.84	chr11-79714804-79715477	36.6516
chr1-83477206-83477839	chr1	83477206	83477839	CTGGGTCGAAGGGAGGG	-0.239364	0.682039	MACS_peak_82	chr1	83476927	83477427	221	44.2	MACS_peak_82	chr1	83477054	83477299	60.71	chr1-83477206-83477839	37.9592
chr20-46293821-46294462	chr20	46293821	46294462	ACGAAGATTGCGGTTGT	3.08966	7.25253e-14	MACS_peak_1944	chr20	46293278	46294728	641	44.2069	MACS_peak_1944	chr20	46293241	46294765	76.16	chr20-46293821-46294462	42.0604
chr17-59362327-59363142	chr17	59362327	59363142	TCACGGGACGGCAGTCG;ATAAAAGTGGGTCATGA	0.250473	0.687658	MACS_peak_1330	chr17	59361548	59362948	621	44.3571	MACS_peak_1330	chr17	59361518	59362977	204.92	chr17-59362327-59363142	44.5511
chr20-53365446-53366023	chr20	53365446	53366023	AGGAAAAATGAATATAT	0.255867	0.599212	MACS_peak_1959	chr20	53365088	53366388	577	44.3846	MACS_peak_1959	chr20	53365044	53366431	65.2	chr20-53365446-53366023	41.6006
chr8-20033237-20033777	chr8	20033237	20033777	ACCGTTTTAAGAATACC	0.100657	0.849113	MACS_peak_3281	chr8	20032959	20033459	222	44.4	MACS_peak_3281	chr8	20033078	20033340	61.76	chr8-20033237-20033777	39.313
chr5-102375852-102376708	chr5	102375852	102376708	CTAGGCAGTGAAGTTGG	-0.525872	0.105431	MACS_peak_2676	chr5	102375574	102376074	222	44.4	MACS_peak_2676	chr5	102375717	102375930	65.46	chr5-102375852-102376708	36.6197
chr5-43849756-43850296	chr5	43849756	43850296	ATAGAGGCGAAGTCAAT;CGTATGGTGTCGGCTAT	-0.349748	0.379716	MACS_peak_2545	chr5	43850074	43850574	222	44.4	MACS_peak_2545	chr5	43850164	43850484	75.09	chr5-43849756-43850296	41.25
chr3-107775642-107776365	chr3	107775642	107776365	TTTGTCCGTTTGGTTAT	0.081263	0.901795	MACS_peak_2176	chr3	107776143	107776643	222	44.4	MACS_peak_2176	chr3	107776207	107776579	63.99	chr3-107775642-107776365	42.4731
chr18-20857557-20858063	chr18	20857557	20858063	AATGCCACTCTATATGT	0.0368946	0.955825	MACS_peak_1422	chr18	20857279	20857779	222	44.4	MACS_peak_1422	chr18	20857417	20857640	67.56	chr18-20857557-20858063	37.2197
chr17-76074124-76074640	chr17	76074124	76074640	TATCCTCGCGTCAAACG	-0.488714	0.409146	MACS_peak_1382	chr17	76074418	76074918	222	44.4	MACS_peak_1382	chr17	76074550	76074785	77.79	chr17-76074124-76074640	38.2979
chr3-63995709-63996287	chr3	63995709	63996287	ACCCATCCTAGGGAGGG	0.449019	0.310804	MACS_peak_2121	chr3	63995558	63996858	578	44.4615	MACS_peak_2121	chr3	63995518	63996897	66.06	chr3-63995709-63996287	41.9144
chr20-53364883-53365666	chr20	53364883	53365666	GGGTGATTGCATCCCGG	0.452025	0.415864	MACS_peak_1959	chr20	53365088	53366388	578	44.4615	MACS_peak_1959	chr20	53365044	53366431	65.2	chr20-53364883-53365666	44.845
chr3-64771047-64771638	chr3	64771047	64771638	AAACCCCCACCATCACT	0.104266	0.763596	MACS_peak_2122	chr3	64770603	64771403	356	44.5	MACS_peak_2122	chr3	64770575	64771431	100.22	chr3-64771047-64771638	44.8598
chr5-41122282-41122809	chr5	41122282	41122809	GTCCGGGGCAAGTCCGC	1.94786	3.03829e-07	MACS_peak_2497	chr5	41122430	41123280	379	44.5882	MACS_peak_2497	chr5	41122392	41123318	355.25	chr5-41122282-41122809	45.0324
chr7-33238179-33238687	chr7	33238179	33238687	ACAGGCCGGCAGCAGTA	0.482462	0.204037	MACS_peak_3120	chr7	33237902	33238402	223	44.6	MACS_peak_3120	chr7	33237976	33238327	72.7	chr7-33238179-33238687	42.1652
chr1-35650072-35650696	chr1	35650072	35650696	GGTGTGGCCCGGTCGGT;TGCATCCTTAGCACGTG	-0.704405	0.0095546	MACS_peak_32	chr1	35649795	35650295	223	44.6	MACS_peak_32	chr1	35649863	35650226	89.85	chr1-35650072-35650696	42.4242
chr3-63995625-63996205	chr3	63995625	63996205	TGTGACTTACCCGACCC	0.013146	0.979451	MACS_peak_2121	chr3	63995558	63996858	580	44.6154	MACS_peak_2121	chr3	63995518	63996897	66.06	chr3-63995625-63996205	42.0595
chr20-53365556-53366136	chr20	53365556	53366136	GCGTAGGGTGCGCAAGC	-0.411504	0.454068	MACS_peak_1959	chr20	53365088	53366388	580	44.6154	MACS_peak_1959	chr20	53365044	53366431	65.2	chr20-53365556-53366136	41.8169
chr17-59361986-59362611	chr17	59361986	59362611	AGAACCGGGGCGCGTCG;ATGCGAAGTGACCATAA	1.55492	5.0187e-07	MACS_peak_1330	chr17	59361548	59362948	625	44.6429	MACS_peak_1330	chr17	59361518	59362977	204.92	chr17-59361986-59362611	42.8376
chr20-53365438-53366019	chr20	53365438	53366019	TAGTTAGTGGGGAGAGC	-0.0312327	0.948233	MACS_peak_1959	chr20	53365088	53366388	581	44.6923	MACS_peak_1959	chr20	53365044	53366431	65.2	chr20-53365438-53366019	41.889
chr17-59703713-59704674	chr17	59703713	59704674	TAGTTAGTTGTGAGTTG	0.359639	0.569927	MACS_peak_1335	chr17	59703280	59705430	961	44.6977	MACS_peak_1335	chr17	59703249	59705461	147.58	chr17-59703713-59704674	43.4448
chr20-53365596-53366178	chr20	53365596	53366178	TGGCCTGGTATAGAAGG	-0.3252	0.511891	MACS_peak_1959	chr20	53365088	53366388	582	44.7692	MACS_peak_1959	chr20	53365044	53366431	65.2	chr20-53365596-53366178	41.9611
chr17-59361806-59362433	chr17	59361806	59362433	TGAGTAGGGGGGGGGGT	2.19822	1.56937e-08	MACS_peak_1330	chr17	59361548	59362948	627	44.7857	MACS_peak_1330	chr17	59361518	59362977	204.92	chr17-59361806-59362433	42.9746
chr6-149657086-149657856	chr6	149657086	149657856	CCCCGGACAGGGATTCC	-0.170617	0.762654	MACS_peak_3067	chr6	149657632	149658132	224	44.8	MACS_peak_3067	chr6	149657759	149658004	77.79	chr6-149657086-149657856	39.5918
chr6-73716447-73717232	chr6	73716447	73717232	TGTAAACTTCACATAGG	-0.105678	0.854121	MACS_peak_2948	chr6	73717008	73717508	224	44.8	MACS_peak_2948	chr6	73717140	73717376	65.48	chr6-73716447-73717232	38.9831
chr3-3606494-3607124	chr3	3606494	3607124	GTGAATTTTCGGGCAGT	-0.20615	0.682277	MACS_peak_2048	chr3	3606218	3606718	224	44.8	MACS_peak_2048	chr3	3606391	3606544	70.16	chr3-3606494-3607124	32.6797
chr1-147567676-147568422	chr1	147567676	147568422	GTTTTGCTGTTTAGTAG	-0.0567438	0.936197	neg_region_24	chr1	147567400	147567900	224	44.8	no_overlap	.	.	.	.	.	.
chr20-53365398-53365981	chr20	53365398	53365981	TGCGGTAGCGAGGCCGA	0.230483	0.467211	MACS_peak_1959	chr20	53365088	53366388	583	44.8462	MACS_peak_1959	chr20	53365044	53366431	65.2	chr20-53365398-53365981	42.0332
chr20-46621411-46621905	chr20	46621411	46621905	TGCGCGAAATGGTTAAT	-0.57848	0.0622411	MACS_peak_1946	chr20	46621298	46622398	494	44.9091	MACS_peak_1946	chr20	46621272	46622423	730.37	chr20-46621411-46621905	42.9192
chr1-182730745-182731401	chr1	182730745	182731401	GGCAGCATAGGGGCTGG	1.44509	2.88997e-06	MACS_peak_191	chr1	182730332	182731082	337	44.9333	MACS_peak_191	chr1	182730292	182731122	453.43	chr1-182730745-182731401	45.4217
chr20-46621793-46622288	chr20	46621793	46622288	GAGGTGGGGTACGCCTG	2.99756	3.60626e-10	MACS_peak_1946	chr20	46621298	46622398	495	45	MACS_peak_1946	chr20	46621272	46622423	730.37	chr20-46621793-46622288	43.0061
chr2-112666774-112667018	chr2	112666774	112667018	GTGGTGGTAGGGGCGGG	0.162888	0.760689	MACS_peak_1696	chr2	112666499	112666999	225	45	MACS_peak_1696	chr2	112666679	112666819	69.73	chr2-112666774-112667018	32.1429
chr17-71610014-71610593	chr17	71610014	71610593	GGGGGTCAATGTGGGAG	-0.0837817	0.907904	MACS_peak_1374	chr17	71610368	71610868	225	45	MACS_peak_1374	chr17	71610518	71610717	100.98	chr17-71610014-71610593	37.6884
chr20-46293610-46294263	chr20	46293610	46294263	ATGTAGTAAACACTCGT	2.88353	4.15004e-15	MACS_peak_1944	chr20	46293278	46294728	653	45.0345	MACS_peak_1944	chr20	46293241	46294765	76.16	chr20-46293610-46294263	42.8478
chr20-53365793-53366380	chr20	53365793	53366380	CGGGCGGGAGCGTAGGT	0.165739	0.638401	MACS_peak_1959	chr20	53365088	53366388	587	45.1538	MACS_peak_1959	chr20	53365044	53366431	65.2	chr20-53365793-53366380	42.3216
chr20-46293387-46294042	chr20	46293387	46294042	CCTGCTGGCCTTACTCT	-0.41954	0.289176	MACS_peak_1944	chr20	46293278	46294728	655	45.1724	MACS_peak_1944	chr20	46293241	46294765	76.16	chr20-46293387-46294042	42.979
chr8-124856533-124857124	chr8	124856533	124857124	CGAGAGGCAATAGGGAC	-0.0605904	0.929481	MACS_peak_3402	chr8	124856559	124857809	565	45.2	MACS_peak_3402	chr8	124856525	124857842	647.49	chr8-124856533-124857124	44.8747
chr7-81252652-81253306	chr7	81252652	81253306	AGGCCTAGAGGTCTGAC	5.1587	4.41882e-51	MACS_peak_3162	chr7	81252378	81252878	226	45.2	MACS_peak_3162	chr7	81252434	81252821	95.19	chr7-81252652-81253306	43.6693
chr16-78832968-78834000	chr16	78832968	78834000	ATTTCATGGAGGCCGGT	0.183206	0.650101	MACS_peak_1220	chr16	78833774	78834274	226	45.2	MACS_peak_1220	chr16	78833950	78834097	66.3	chr16-78832968-78834000	34.0136
chr20-53365766-53366354	chr20	53365766	53366354	TTGATCAGTGCTCAGTG	-0.384899	0.235596	MACS_peak_1959	chr20	53365088	53366388	588	45.2308	MACS_peak_1959	chr20	53365044	53366431	65.2	chr20-53365766-53366354	42.3937
chr3-64770412-64770965	chr3	64770412	64770965	TACCAGTGGCGGTATCA	-0.0538039	0.90149	MACS_peak_2122	chr3	64770603	64771403	362	45.25	MACS_peak_2122	chr3	64770575	64771431	100.22	chr3-64770412-64770965	45.5607
chr3-64770476-64770965	chr3	64770476	64770965	AATGGTTTTCCAGGGCA	-0.390628	0.440756	MACS_peak_2122	chr3	64770603	64771403	362	45.25	MACS_peak_2122	chr3	64770575	64771431	100.22	chr3-64770476-64770965	45.5607
chr9-114906625-114907192	chr9	114906625	114907192	GCAGGGGTCCGGAAGTG	0.0316452	0.955778	MACS_peak_3529	chr9	114906943	114907493	249	45.2727	MACS_peak_3529	chr9	114906914	114907522	275.26	chr9-114906625-114907192	45.7237
chr20-46621551-46622049	chr20	46621551	46622049	GGGCAGGGGGTGCGGGC	3.14519	5.56749e-16	MACS_peak_1946	chr20	46621298	46622398	498	45.2727	MACS_peak_1946	chr20	46621272	46622423	730.37	chr20-46621551-46622049	43.2667
chr20-53365393-53365983	chr20	53365393	53365983	GGGGGCCGTGGATGTGG	0.20578	0.550965	MACS_peak_1959	chr20	53365088	53366388	590	45.3846	MACS_peak_1959	chr20	53365044	53366431	65.2	chr20-53365393-53365983	42.5379
chr17-59755938-59756823	chr17	59755938	59756823	TATCGCCGCCTCAGAAG	0.28849	0.594614	MACS_peak_1338	chr17	59755395	59757345	885	45.3846	MACS_peak_1338	chr17	59755362	59757378	75.13	chr17-59755938-59756823	43.8988
chr5-129367221-129367730	chr5	129367221	129367730	ACTTGAGGGGTAGGGGA	0.0126228	0.978608	MACS_peak_2739	chr5	129367503	129368003	227	45.4	MACS_peak_2739	chr5	129367653	129367853	60.42	chr5-129367221-129367730	38.5
chr5-46018587-46019223	chr5	46018587	46019223	TGTGGCAGCGGGGCGCG;CAGTGAGTCAACTCATT	0.434728	0.248459	MACS_peak_2578	chr5	46018996	46019496	227	45.4	MACS_peak_2578	chr5	46019129	46019363	69.92	chr5-46018587-46019223	40.1709
chr3-148909969-148910468	chr3	148909969	148910468	TATTCCACTACAAACGT;CGTACTTGGCTTTGGGT	0.0159737	0.959122	MACS_peak_2212	chr3	148909696	148910196	227	45.4	MACS_peak_2212	chr3	148909664	148910228	265.07	chr3-148909969-148910468	45.922
chr2-161209213-161209715	chr2	161209213	161209715	GAGTCGAGTCTCGTAGC	0.329884	0.204274	MACS_peak_1759	chr2	161208940	161209440	227	45.4	MACS_peak_1759	chr2	161208944	161209435	125.64	chr2-161209213-161209715	45.2138
chr11-65623603-65624139	chr11	65623603	65624139	ATGGGTGTGGAAAGTGG;ACGTAAGGAAGTGGGTG;GCCGAATGGTGGGCAGC	0.174305	0.114501	MACS_peak_516	chr11	65623330	65623830	227	45.4	MACS_peak_516	chr11	65623413	65623747	140.14	chr11-65623603-65624139	43.1138
chr1-216666901-216667639	chr1	216666901	216667639	TATAGTGGCACATACGA	-0.12156	0.78593	MACS_peak_266	chr1	216666628	216667128	227	45.4	MACS_peak_266	chr1	216666771	216666984	68.17	chr1-216666901-216667639	38.9671
chr8-144198833-144199400	chr8	144198833	144199400	GCGAGGGAAGAACGGAG	0.194995	0.777425	MACS_peak_3437	chr8	144198561	144199061	228	45.6	MACS_peak_3437	chr8	144198554	144199068	103.52	chr8-144198833-144199400	45.7198
chr5-45878169-45878457	chr5	45878169	45878457	GTCAGGTGGTGGAATGG	0.819538	0.0114821	MACS_peak_2576	chr5	45878229	45878729	228	45.6	MACS_peak_2576	chr5	45878331	45878626	73.41	chr5-45878169-45878457	42.7119
chr4-103731163-103732014	chr4	103731163	103732014	CCATCACTGCAGGGGTC	-0.48197	0.301574	MACS_peak_2363	chr4	103730891	103731391	228	45.6	MACS_peak_2363	chr4	103731021	103731261	64.88	chr4-103731163-103732014	40.8333
chr16-73447093-73447649	chr16	73447093	73447649	TCTGTTATATTGATTGG	-0.0776083	0.853411	MACS_peak_1188	chr16	73446821	73447321	228	45.6	MACS_peak_1188	chr16	73446947	73447194	65.43	chr16-73447093-73447649	40.8907
chr16-65637788-65638411	chr16	65637788	65638411	AATCGGCCTCCGGTCCG	0.183952	0.814081	MACS_peak_1165	chr16	65637516	65638016	228	45.6	MACS_peak_1165	chr16	65637688	65637844	66.04	chr16-65637788-65638411	35.8974
chr15-51090334-51090969	chr15	51090334	51090969	AGGCGAACTCCTCAGGT;GATCATCAACATGAGTT	0.456749	0.0148926	MACS_peak_1024	chr15	51090062	51090562	228	45.6	MACS_peak_1024	chr15	51090072	51090552	93.88	chr15-51090334-51090969	45.4167
chr20-46620900-46621800	chr20	46620900	46621800	TTCGTGTCTTATGAGAC;AGGCCTTCCAAACATTA	0.291479	0.320331	MACS_peak_1946	chr20	46621298	46622398	502	45.6364	MACS_peak_1946	chr20	46621272	46622423	730.37	chr20-46620900-46621800	45.8732
chr12-69202773-69203947	chr12	69202773	69203947	GGTTCTCGTAATATAGG	0.0917513	0.928693	MACS_peak_693	chr12	69202447	69203047	274	45.6667	MACS_peak_693	chr12	69202407	69203087	720.04	chr12-69202773-69203947	46.1765
chr7-159103714-159104302	chr7	159103714	159104302	GCCCTAAGTGACTAGAG	-0.0331912	0.969006	MACS_peak_3255	chr7	159103443	159103943	229	45.8	MACS_peak_3255	chr7	159103553	159103833	63.13	chr7-159103714-159104302	42.5
chr4-3584391-3584716	chr4	3584391	3584716	GTGCCGGGTCCGTGGTG	-0.330712	0.634326	MACS_peak_2266	chr4	3584487	3584987	229	45.8	MACS_peak_2266	chr4	3584652	3584821	65.52	chr4-3584391-3584716	37.8698
chr3-128889128-128889608	chr3	128889128	128889608	TTTTTGTGGTTGGTCGA	-0.231999	0.561791	MACS_peak_2195	chr3	128888857	128889357	229	45.8	MACS_peak_2195	chr3	128888972	128889242	86.49	chr3-128889128-128889608	42.2222
chr2-217059681-217060125	chr2	217059681	217060125	TGATTGTAGTGAGGGGA	-3.6395	1.13881e-33	MACS_peak_1862	chr2	217059410	217059910	229	45.8	MACS_peak_1862	chr2	217059595	217059724	84.76	chr2-217059681-217060125	33.3333
chr2-14427862-14428334	chr2	14427862	14428334	AGGGACGTGGTCCCTGG	0.0753283	0.87085	MACS_peak_1576	chr2	14428105	14428605	229	45.8	MACS_peak_1576	chr2	14428164	14428545	136.69	chr2-14427862-14428334	44.6194
chr12-11323236-11323900	chr12	11323236	11323900	GTGATCGCTGGATGACG	0.776666	0.173487	MACS_peak_612	chr12	11323671	11324171	229	45.8	MACS_peak_612	chr12	11323763	11324078	60.3	chr12-11323236-11323900	43.4921
chr5-42838397-42839058	chr5	42838397	42839058	GCTCGGAGTCACAAGTT;GTCTTAGGCTAATTAGA	-0.402303	0.0538701	MACS_peak_2521	chr5	42838828	42839328	230	46	MACS_peak_2521	chr5	42838905	42839251	73.44	chr5-42838397-42839058	44.2197
chr12-85613368-85613885	chr12	85613368	85613885	AAACCTTTACTGGGGAC;GTTAATGTGGGTGGGCG	0.177689	0.821136	MACS_peak_747	chr12	85613098	85613598	230	46	MACS_peak_747	chr12	85613227	85613469	64.58	chr12-85613368-85613885	41.7355
chr1-145105166-145105723	chr1	145105166	145105723	GTGAGGGACGGCTGGGG	0.156819	0.738513	MACS_peak_127	chr1	145105493	145105993	230	46	MACS_peak_127	chr1	145105462	145106023	65.47	chr1-145105166-145105723	46.5241
chr2-186013650-186014255	chr2	186013650	186014255	TGCTGTTCAGTTTATCC	0.873405	0.00501067	MACS_peak_1809	chr2	186014024	186014524	231	46.2	MACS_peak_1809	chr2	186014199	186014348	66.04	chr2-186013650-186014255	37.5839
chr16-16955153-16955758	chr16	16955153	16955758	GGGGTGTCGAGGCAGCC	2.69016	2.77779e-08	MACS_peak_1135	chr16	16955527	16956027	231	46.2	MACS_peak_1135	chr16	16955570	16955983	138.05	chr16-16955153-16955758	45.5206
chr20-53365115-53365717	chr20	53365115	53365717	GTGCGTTGAATGAACTG;CAACCCGATACAGCGGG	0.222628	0.817818	MACS_peak_1959	chr20	53365088	53366388	602	46.3077	MACS_peak_1959	chr20	53365044	53366431	65.2	chr20-53365115-53365717	43.403
chr17-59362299-59363037	chr17	59362299	59363037	AATGTCATAAGCTCGAG	-0.146923	0.758806	MACS_peak_1330	chr17	59361548	59362948	649	46.3571	MACS_peak_1330	chr17	59361518	59362977	204.92	chr17-59362299-59363037	46.4702
chr3-64821168-64822003	chr3	64821168	64822003	TCGCACCAAAAGTCACG	4.54455	3.50024e-38	MACS_peak_2123	chr3	64821118	64822918	835	46.3889	MACS_peak_2123	chr3	64821081	64822955	121.49	chr3-64821168-64822003	44.5571
chr3-13567771-13568236	chr3	13567771	13568236	TGCGCTAGGCTGGGGGG	0.115582	0.884856	MACS_peak_2066	chr3	13567503	13568003	232	46.4	MACS_peak_2066	chr3	13567535	13567971	67.31	chr3-13567771-13568236	45.8716
chr20-53396375-53397303	chr20	53396375	53397303	AGCCATTAGCGGACTAT	0.324818	0.167005	MACS_peak_1960	chr20	53396079	53398079	928	46.4	MACS_peak_1960	chr20	53396048	53398110	79.03	chr20-53396375-53397303	45.0048
chr20-18832405-18833118	chr20	18832405	18833118	TCAATGAGCGTTATGGA	0.259103	0.789988	MACS_peak_1911	chr20	18832886	18833386	232	46.4	MACS_peak_1911	chr20	18832965	18833306	64.42	chr20-18832405-18833118	44.868
chr20-52937471-52938449	chr20	52937471	52938449	AGAAGTCTTAAGGCATG	0.309999	0.482186	MACS_peak_1954	chr20	52937123	52937773	302	46.4615	MACS_peak_1954	chr20	52937097	52937798	63.93	chr20-52937471-52938449	46.6476
chr14-67399592-67400096	chr14	67399592	67400096	GGCGGGGAAGGGGGGGG	-0.0254353	0.964234	MACS_peak_931	chr14	67399244	67399894	302	46.4615	MACS_peak_931	chr14	67399212	67399925	305.76	chr14-67399592-67400096	46.7041
chr8-124856980-124857561	chr8	124856980	124857561	TGGTGGGAGCGTAGCAT	2.60287	3.36932e-07	MACS_peak_3402	chr8	124856559	124857809	581	46.48	MACS_peak_3402	chr8	124856525	124857842	647.49	chr8-124856980-124857561	44.1154
chr8-91141116-91141880	chr8	91141116	91141880	ACGCGAGCCGGCCGTGC	0.181549	0.689234	MACS_peak_3327	chr8	91141647	91142147	233	46.6	MACS_peak_3327	chr8	91141774	91142020	68.78	chr8-91141116-91141880	43.0894
chr4-140280989-140281662	chr4	140280989	140281662	CTGCGGGCTGGGGAGAG	0.305219	0.55419	MACS_peak_2398	chr4	140281429	140281929	233	46.6	MACS_peak_2398	chr4	140281539	140281818	77.79	chr4-140280989-140281662	44.086
chr17-50384073-50384746	chr17	50384073	50384746	TGGTGTGCGGATTTGGG	-0.203612	0.720292	MACS_peak_1297	chr17	50384513	50385013	233	46.6	MACS_peak_1297	chr17	50384673	50384852	63.99	chr17-50384073-50384746	40.7821
chr11-80092029-80092546	chr11	80092029	80092546	GCGGTGATGGCGCATTT	0.155883	0.731307	MACS_peak_548	chr11	80091762	80092262	233	46.6	MACS_peak_548	chr11	80091812	80092211	98.34	chr11-80092029-80092546	45.614
chr20-53365782-53366414	chr20	53365782	53366414	ACGTCTAGTTGTGTAGG	-0.107267	0.806298	MACS_peak_1959	chr20	53365088	53366388	606	46.6154	MACS_peak_1959	chr20	53365044	53366431	65.2	chr20-53365782-53366414	45.566
chr16-74464843-74465482	chr16	74464843	74465482	GAATGGACGGGTGAGCG	2.15408	3.35765e-07	MACS_peak_1198	chr16	74465179	74465829	303	46.6154	MACS_peak_1198	chr16	74465152	74465856	207.23	chr16-74464843-74465482	46.875
chr1-115260148-115260521	chr1	115260148	115260521	ACCCGGTACGGTGGGAT	0.0133402	0.982167	MACS_peak_117	chr1	115259955	115260755	373	46.625	MACS_peak_117	chr1	115259914	115260796	76.41	chr1-115260148-115260521	42.2902
chr3-63995595-63996203	chr3	63995595	63996203	ACTACATGTTCTTAATC;TGGGTCACATGTCGAAA	-0.307681	0.281963	MACS_peak_2121	chr3	63995558	63996858	608	46.7692	MACS_peak_2121	chr3	63995518	63996897	66.06	chr3-63995595-63996203	44.0899
chr5-62961294-62962088	chr5	62961294	62962088	GTTTCGCGCACCCACGG	-0.178217	0.67749	MACS_peak_2603	chr5	62961028	62961528	234	46.8	MACS_peak_2603	chr5	62961187	62961368	63.63	chr5-62961294-62962088	40.884
chr3-184045126-184045829	chr3	184045126	184045829	ATCATCACTGAAATTCT;TATGCCTTGGGGTTATG	-0.0240165	0.996952	MACS_peak_2239	chr3	184044860	184045360	234	46.8	MACS_peak_2239	chr3	184044968	184045252	67.23	chr3-184045126-184045829	44.3662
chr20-35869057-35869797	chr20	35869057	35869797	GAGGTGATCCGCCCGTT	0.523606	0.191373	MACS_peak_1933	chr20	35869563	35870063	234	46.8	MACS_peak_1933	chr20	35869688	35869938	60.95	chr20-35869057-35869797	43.6
chr10-99888597-99889028	chr10	99888597	99889028	TTGCTTTGCGGGGACGG	-0.0979094	0.895799	MACS_peak_401	chr10	99888794	99889294	234	46.8	MACS_peak_401	chr10	99888944	99889144	60.42	chr10-99888597-99889028	42
chr8-128807707-128808224	chr8	128807707	128808224	CCCCCCTCTTCATGCCA	2.94811	1.12341e-16	MACS_peak_3412	chr8	128807345	128808445	517	47	MACS_peak_3412	chr8	128807314	128808476	189.13	chr8-128807707-128808224	44.4923
chr22-34730951-34731519	chr22	34730951	34731519	TGAGATAGTCGGTAGGT	0.139736	0.885134	MACS_peak_2017	chr22	34731284	34731784	235	47	MACS_peak_2017	chr22	34731438	34731630	61.73	chr22-34730951-34731519	42.1875
chr16-75937443-75937981	chr16	75937443	75937981	GACCTCCATAGTCCTAG	4.1479	1.5683e-28	MACS_peak_1204	chr16	75937178	75937678	235	47	MACS_peak_1204	chr16	75937267	75937588	139.96	chr16-75937443-75937981	45.1713
chr11-78867320-78867805	chr11	78867320	78867805	GTGGTGTTCCATTAGTG	0.210014	0.534316	MACS_peak_543	chr11	78867055	78867555	235	47	MACS_peak_543	chr11	78867164	78867445	60.99	chr11-78867320-78867805	44.484
chrX-145898965-145899498	chrX	145898965	145899498	CTATGGCTAGAATACCT	-0.261533	0.667734	neg_region_36	chrX	145898700	145899200	235	47	no_overlap	.	.	.	.	.	.
chr20-46621262-46621816	chr20	46621262	46621816	TAGAGACTTAACTGCAG;AGTGTACGGTACTCTCA	-0.270556	0.830446	MACS_peak_1946	chr20	46621298	46622398	518	47.0909	MACS_peak_1946	chr20	46621272	46622423	730.37	chr20-46621262-46621816	47.2632
chr5-141948152-141948639	chr5	141948152	141948639	CATTTGCTCGTATCTTG;TGTGAGGAAGGGAACGG	-0.322259	0.239445	MACS_peak_2765	chr5	141948403	141948903	236	47.2	MACS_peak_2765	chr5	141948521	141948785	68.17	chr5-141948152-141948639	44.697
chr19-56112787-56113894	chr19	56112787	56113894	CCCGCGGCACATAGGAG	-0.00230431	0.997252	MACS_peak_1545	chr19	56112523	56113023	236	47.2	MACS_peak_1545	chr19	56112548	56112998	63.46	chr19-56112787-56113894	46.8889
chr20-53396505-53397452	chr20	53396505	53397452	GGAGGCGAAGTTGGCTC	0.302542	0.453821	MACS_peak_1960	chr20	53396079	53398079	947	47.35	MACS_peak_1960	chr20	53396048	53398110	79.03	chr20-53396505-53397452	45.9263
chr20-53365267-53365883	chr20	53365267	53365883	CAGTACTTGCCCCCAAC	0.637508	0.0346464	MACS_peak_1959	chr20	53365088	53366388	616	47.3846	MACS_peak_1959	chr20	53365044	53366431	65.2	chr20-53365267-53365883	44.4124
chr8-111417654-111418259	chr8	111417654	111418259	GGGAGGGAAGGCGGGGC;TTGTCTCAGTTGGTGCG	0.6667	0.0415957	MACS_peak_3365	chr8	111417391	111417891	237	47.4	MACS_peak_3365	chr8	111417501	111417781	62.37	chr8-111417654-111418259	45.3571
chr15-72511011-72511324	chr15	72511011	72511324	GGGGGGTCGGGAGATGG	-0.365105	0.261022	MACS_peak_1085	chr15	72511087	72511587	237	47.4	MACS_peak_1085	chr15	72511253	72511421	105.94	chr15-72511011-72511324	42.2619
chr5-112258399-112258862	chr5	112258399	112258862	TGCCTCTCTAAGGATCT;TGGGGATCCGGAGCCTC	-0.245665	0.866387	REEP5	chr5	112258136	112258636	237	47.4	no_overlap	.	.	.	.	.	.
chr9-136745639-136746381	chr9	136745639	136746381	CAGCACGCTTGAGGGAA	-0.366717	0.439575	MACS_peak_3562	chr9	136745905	136746905	476	47.6	MACS_peak_3562	chr9	136745872	136746937	927.04	chr9-136745639-136746381	47.7934
chr3-63819900-63820274	chr3	63819900	63820274	TCTTTGTACGGACCGAA	-0.128615	0.79191	MACS_peak_2120	chr3	63819638	63820138	238	47.6	MACS_peak_2120	chr3	63819733	63820043	68.31	chr3-63819900-63820274	46.129
chr1-190548966-190549620	chr1	190548966	190549620	AACAGTGAAACATGTAG	0.0203224	0.975741	MACS_peak_210	chr1	190549382	190549882	238	47.6	MACS_peak_210	chr1	190549514	190549750	67.56	chr1-190548966-190549620	44.9153
chr16-23567254-23568230	chr16	23567254	23568230	ACGCTCGAGTTACGGGG	0.0165065	0.977043	UBFD1	chr16	23567992	23568492	238	47.6	no_overlap	.	.	.	.	.	.
chr6-85545127-85545883	chr6	85545127	85545883	CCGGTAATACGTATCTA	0.0843876	0.840199	MACS_peak_2974	chr6	85545644	85546144	239	47.8	MACS_peak_2974	chr6	85545763	85546025	93.9	chr6-85545127-85545883	45.8015
chr6-65979205-65980000	chr6	65979205	65980000	GTTCGGGGTGCGAAGGG	-0.125657	0.780212	MACS_peak_2933	chr6	65978944	65979444	239	47.8	MACS_peak_2933	chr6	65979108	65979279	62.35	chr6-65979205-65980000	43.2749
chr5-56116824-56117394	chr5	56116824	56117394	TATCTGGAGTCAGTTTG;ACACCGAATGCTCCGGG	-0.413253	0.327472	MACS_peak_2592	chr5	56116563	56117063	239	47.8	MACS_peak_2592	chr5	56116670	56116956	104.99	chr5-56116824-56117394	46.1538
chr5-36378128-36378890	chr5	36378128	36378890	GGTGTTGCCCCCCGACG	-0.5686	0.0988024	MACS_peak_2468	chr5	36378651	36379151	239	47.8	MACS_peak_2468	chr5	36378659	36379142	129.22	chr5-36378128-36378890	47.8261
chr6-36644225-36644683	chr6	36644225	36644683	TAGCTGTCATCTGGCTG	4.25502	3.15139e-25	MACS_peak_2876	chr6	36643808	36644608	383	47.875	MACS_peak_2876	chr6	36643779	36644637	1604.96	chr6-36644225-36644683	48.0186
chr3-63995618-63996242	chr3	63995618	63996242	GGTGACAATTGATGTAG;GTGAAAATGCTGTAAGG	0.0836054	0.954574	MACS_peak_2121	chr3	63995558	63996858	624	48	MACS_peak_2121	chr3	63995518	63996897	66.06	chr3-63995618-63996242	45.2502
chr2-1708126-1708875	chr2	1708126	1708875	GAGTTAAGTTACTAGGT	0.315347	0.30742	MACS_peak_1557	chr2	1708635	1709135	240	48	MACS_peak_1557	chr2	1708636	1709134	126.54	chr2-1708126-1708875	47.992
chr17-25658190-25658490	chr17	25658190	25658490	CTGTGGCAGCGAGTGTG	3.92482	4.1314e-40	MACS_peak_1267	chr17	25658250	25658750	240	48	MACS_peak_1267	chr17	25658354	25658646	68.17	chr17-25658190-25658490	46.5753
chr16-74773619-74774241	chr16	74773619	74774241	TGGTTGGCGGAGGTAAG;TCGAGGGGACAGCGTGG	-0.0984162	0.941647	MACS_peak_1201	chr16	74773359	74773859	240	48	MACS_peak_1201	chr16	74773394	74773824	68.33	chr16-74773619-74774241	47.6744
chr14-39492683-39493179	chr14	39492683	39493179	TTGCTCAGTGCCAGTGC	3.62284	1.66548e-23	MACS_peak_890	chr14	39492915	39493465	264	48	MACS_peak_890	chr14	39492886	39493493	175.14	chr14-39492683-39493179	48.2702
chr14-32814728-32815240	chr14	32814728	32815240	ACTCATGGCGTTGGCGG	-0.562722	0.0179623	MACS_peak_882	chr14	32814442	32814992	264	48	MACS_peak_882	chr14	32814405	32815029	389.02	chr14-32814728-32815240	48.2372
chr1-115259699-115260340	chr1	115259699	115260340	TGGCCGGTCCGGAAGGG	-0.472807	0.274929	MACS_peak_117	chr1	115259955	115260755	385	48.125	MACS_peak_117	chr1	115259914	115260796	76.41	chr1-115259699-115260340	48.2993
chr7-100693805-100694378	chr7	100693805	100694378	CGGGCAGTCTGTAGGTA	-0.312145	0.445466	MACS_peak_3181	chr7	100693546	100694046	241	48.2	MACS_peak_3181	chr7	100693705	100693886	62.74	chr7-100693805-100694378	44.7514
chr5-42962979-42963740	chr5	42962979	42963740	CGGGAGGCCACGGAGAT	-0.148996	0.766589	MACS_peak_2524	chr5	42963499	42963999	241	48.2	MACS_peak_2524	chr5	42963547	42963951	66.21	chr5-42962979-42963740	47.7723
chr3-96271683-96271924	chr3	96271683	96271924	AGTCTGGCGCGGCTGAT	-0.873683	0.00121355	MACS_peak_2165	chr3	96271446	96271946	241	48.2	MACS_peak_2165	chr3	96271571	96271821	62.44	chr3-96271683-96271924	55.2
chr14-57132636-57133156	chr14	57132636	57133156	GACGGTAGCTCAGGAAG	0.360456	0.267257	MACS_peak_908	chr14	57132915	57133415	241	48.2	MACS_peak_908	chr14	57132934	57133396	150.2	chr14-57132636-57133156	48.0519
chr13-51708137-51708741	chr13	51708137	51708741	TTAGTATAAGATTATTC;CGGTTGTAGGTAAAGGT	0.157197	0.397383	MACS_peak_851	chr13	51707878	51708378	241	48.2	MACS_peak_851	chr13	51708035	51708220	62.04	chr13-51708137-51708741	44.8649
chr12-92296830-92297311	chr12	92296830	92297311	GCGGTAGTTCTAATAAG	2.70546	3.47346e-10	MACS_peak_763	chr12	92296571	92297071	241	48.2	MACS_peak_763	chr12	92296577	92297064	101.92	chr12-92296830-92297311	48.0493
chr17-59362046-59362722	chr17	59362046	59362722	CAAGAGTAAAGTTCGGG	4.07885	1.97019e-42	MACS_peak_1330	chr17	59361548	59362948	676	48.2857	MACS_peak_1330	chr17	59361518	59362977	204.92	chr17-59362046-59362722	46.3331
chr17-59361873-59362549	chr17	59361873	59362549	TCGGTCCACGTGTCAGG	1.75094	0.000101252	MACS_peak_1330	chr17	59361548	59362948	676	48.2857	MACS_peak_1330	chr17	59361518	59362977	204.92	chr17-59361873-59362549	46.3331
chr17-59361709-59362386	chr17	59361709	59362386	GCTGGGGTGTGGCGCGT	3.38189	2.84447e-27	MACS_peak_1330	chr17	59361548	59362948	677	48.3571	MACS_peak_1330	chr17	59361518	59362977	204.92	chr17-59361709-59362386	46.4016
chr8-110830732-110831315	chr8	110830732	110831315	TTCTGTATGGATTTCTG	-0.278775	0.388144	MACS_peak_3360	chr8	110830474	110830974	242	48.4	MACS_peak_3360	chr8	110830593	110830854	68.52	chr8-110830732-110831315	46.7433
chr8-882558-883170	chr8	882558	883170	TGGACGCTAAGTAGGCG	0.23613	0.59983	MACS_peak_3258	chr8	882300	882800	242	48.4	MACS_peak_3258	chr8	882416	882683	61.09	chr8-882558-883170	46.8165
chr16-76631818-76632479	chr16	76631818	76632479	ATTGGGGCAGGTGAATT	-0.795485	0.0146789	MACS_peak_1209	chr16	76631560	76632060	242	48.4	MACS_peak_1209	chr16	76631699	76631921	67.68	chr16-76631818-76632479	46.3964
chrX-53410743-53411208	chrX	53410743	53411208	GGAAGCGAGGGCGAGGT	-0.610237	0.188755	MACS_peak_3599	chrX	53410486	53410986	243	48.6	MACS_peak_3599	chrX	53410564	53410907	133.49	chrX-53410743-53411208	47.8134
chr9-111792703-111793148	chr9	111792703	111793148	AAGTTACAAGGCGATCC	-0.652313	0.0463997	MACS_peak_3525	chr9	111792446	111792946	243	48.6	MACS_peak_3525	chr9	111792579	111792813	62.1	chr9-111792703-111793148	47.0085
chr8-131697920-131698579	chr8	131697920	131698579	GGCCTAGGTGTCCGAGG	0.110406	0.895614	MACS_peak_3415	chr8	131697663	131698163	243	48.6	MACS_peak_3415	chr8	131697743	131698082	62.1	chr8-131697920-131698579	47.7876
chr6-100415862-100416105	chr6	100415862	100416105	CGTCTGGAGGAGTGGGC	-0.608521	0.223196	MACS_peak_3001	chr6	100415689	100416189	243	48.6	MACS_peak_3001	chr6	100415785	100416093	65.69	chr6-100415862-100416105	75
chr5-42597860-42598527	chr5	42597860	42598527	GAGCGGTTCCCGGCAAT	0.185112	0.581487	MACS_peak_2512	chr5	42598284	42598784	243	48.6	MACS_peak_2512	chr5	42598328	42598740	159.45	chr5-42597860-42598527	48.301
chr3-63819246-63819881	chr3	63819246	63819881	GGAGACCTCCAAGCGCT	-0.0929848	0.852285	MACS_peak_2120	chr3	63819638	63820138	243	48.6	MACS_peak_2120	chr3	63819733	63820043	68.31	chr3-63819246-63819881	47.7419
chr12-56119448-56119961	chr12	56119448	56119961	GGTGGTAGGGTCGTAGT	0.114547	0.788507	MACS_peak_657	chr12	56119718	56120218	243	48.6	MACS_peak_657	chr12	56119870	56120066	63.06	chr12-56119448-56119961	46.4286
chr9-41828225-41828793	chr9	41828225	41828793	ATTTCGGGAGGGAATAG	-0.471315	0.217418	neg_region_17	chr9	41828550	41829050	243	48.6	no_overlap	.	.	.	.	.	.
chr20-53365756-53366493	chr20	53365756	53366493	GTCGGACACGGAAGGGT	-0.303483	0.669039	MACS_peak_1959	chr20	53365088	53366388	632	48.6154	MACS_peak_1959	chr20	53365044	53366431	65.2	chr20-53365756-53366493	48.6662
chr20-46293802-46294507	chr20	46293802	46294507	CGGTGTCCTATACGCAG	-0.39278	0.503836	MACS_peak_1944	chr20	46293278	46294728	705	48.6207	MACS_peak_1944	chr20	46293241	46294765	76.16	chr20-46293802-46294507	46.2598
chr17-49027102-49027538	chr17	49027102	49027538	TGAATCTATAGCTGGAC	3.10685	5.68375e-22	MACS_peak_1292	chr17	49026691	49027491	389	48.625	MACS_peak_1292	chr17	49026662	49027520	333	chr17-49027102-49027538	48.7179
chr3-63996053-63996687	chr3	63996053	63996687	TGAGGGGTCTAATGGTG	-1.13196	0.0163135	MACS_peak_2121	chr3	63995558	63996858	634	48.7692	MACS_peak_2121	chr3	63995518	63996897	66.06	chr3-63996053-63996687	45.9753
chr20-53365683-53366317	chr20	53365683	53366317	TGCGTATGTGAGGCCGT;GCCTGGGGCTTAGAGGG	0.00384299	0.362805	MACS_peak_1959	chr20	53365088	53366388	634	48.7692	MACS_peak_1959	chr20	53365044	53366431	65.2	chr20-53365683-53366317	45.7102
chr8-115247564-115247808	chr8	115247564	115247808	GCCGGTGAAGGGCTGGG	0.427598	0.309389	MACS_peak_3382	chr8	115247499	115247999	244	48.8	MACS_peak_3382	chr8	115247628	115247869	61.77	chr8-115247564-115247808	74.6888
chr7-66809601-66810045	chr7	66809601	66810045	AATAGTGGGGAGGGGAG	2.67074	1.67893e-19	MACS_peak_3143	chr7	66809801	66810301	244	48.8	MACS_peak_3143	chr7	66809879	66810222	83.6	chr7-66809601-66810045	48.3965
chr6-86320928-86321172	chr6	86320928	86321172	CTAGGAGAGGTGGCAAG	0.26312	0.78701	MACS_peak_2977	chr6	86320898	86321398	244	48.8	MACS_peak_2977	chr6	86321047	86321248	60.26	chr6-86320928-86321172	62.1891
chr5-42839084-42839626	chr5	42839084	42839626	CTCGGCTGAGCAGCAGG	0.434287	0.204037	MACS_peak_2521	chr5	42838828	42839328	244	48.8	MACS_peak_2521	chr5	42838905	42839251	73.44	chr5-42839084-42839626	48.2659
chr5-41805175-41805762	chr5	41805175	41805762	ATGGGAGCGTGGATGGG	-1.56174	0.000160287	MACS_peak_2506	chr5	41804919	41805419	244	48.8	MACS_peak_2506	chr5	41805093	41805245	67.67	chr5-41805175-41805762	46.0526
chr20-35869062-35869807	chr20	35869062	35869807	ATATGCGTTCTTTCTAG	-0.170547	0.814063	MACS_peak_1933	chr20	35869563	35870063	244	48.8	MACS_peak_1933	chr20	35869688	35869938	60.95	chr20-35869062-35869807	47.6
chr2-97150287-97150886	chr2	97150287	97150886	GGTAACATTGCGTTCCG	0.12674	0.761077	MACS_peak_1681	chr2	97150642	97151142	244	48.8	MACS_peak_1681	chr2	97150806	97150978	62.16	chr2-97150287-97150886	46.5116
chr2-31186478-31187054	chr2	31186478	31187054	GAGTGAGCAAGTTTTTT;TGGAGGCCTCTAGGGAC	0.0145474	0.693932	MACS_peak_1606	chr2	31186810	31187310	244	48.8	MACS_peak_1606	chr2	31186889	31187230	62.37	chr2-31186478-31187054	48.3871
chr16-60022164-60022702	chr16	60022164	60022702	TGTATAAGAGGTCAGCG	0.0852155	0.900208	MACS_peak_1163	chr16	60022458	60022958	244	48.8	MACS_peak_1163	chr16	60022498	60022918	111.01	chr16-60022164-60022702	48.5714
chr15-72499218-72499697	chr15	72499218	72499697	GCGGTTAGTGGTTAGTG	-0.323734	0.451841	MACS_peak_1083	chr15	72498962	72499462	244	48.8	MACS_peak_1083	chr15	72499035	72499388	87.95	chr15-72499218-72499697	48.1586
chr11-77019513-77020133	chr11	77019513	77020133	AGTCGCCACAGAGTAGC;GGGAGCGGCCTCCAGAG;CACGCGGCAATGTGGGG	0.262344	0.215319	MACS_peak_539	chr11	77019257	77019757	244	48.8	MACS_peak_539	chr11	77019367	77019647	62.89	chr11-77019513-77020133	47.8571
chr1-72466661-72467185	chr1	72466661	72467185	AAGATCTGAGGGGTGTG	2.71706	8.20287e-13	MACS_peak_78	chr1	72466405	72466905	244	48.8	MACS_peak_78	chr1	72466447	72466863	122.21	chr1-72466661-72467185	48.5577
chr3-63995563-63996198	chr3	63995563	63996198	ACGTATGAAGGGATCTG	0.290802	0.383252	MACS_peak_2121	chr3	63995558	63996858	635	48.8462	MACS_peak_2121	chr3	63995518	63996897	66.06	chr3-63995563-63996198	46.0479
chr20-46293377-46294086	chr20	46293377	46294086	AGTTGCGATGGCAGGGG	-0.092443	0.813794	MACS_peak_1944	chr20	46293278	46294728	709	48.8966	MACS_peak_1944	chr20	46293241	46294765	76.16	chr20-46293377-46294086	46.5223
chr8-144198816-144199492	chr8	144198816	144199492	TTTAGATGTCGTGGATC	-0.0352163	0.970913	MACS_peak_3437	chr8	144198561	144199061	245	49	MACS_peak_3437	chr8	144198554	144199068	103.52	chr8-144198816-144199492	49.0272
chr20-53365108-53365745	chr20	53365108	53365745	CCAAGTCTCGGCAGGCC	0.231205	0.690082	MACS_peak_1959	chr20	53365088	53366388	637	49	MACS_peak_1959	chr20	53365044	53366431	65.2	chr20-53365108-53365745	45.9265
chr2-25107213-25108163	chr2	25107213	25108163	TCATGTGGCGAGCGCAT	1.71801	4.67366e-05	MACS_peak_1594	chr2	25107918	25108418	245	49	MACS_peak_1594	chr2	25108058	25108277	70.62	chr2-25107213-25108163	47.9452
chr17-59362071-59362757	chr17	59362071	59362757	TCTACCATTGGCATATG	0.101241	0.849677	MACS_peak_1330	chr17	59361548	59362948	686	49	MACS_peak_1330	chr17	59361518	59362977	204.92	chr17-59362071-59362757	47.0185
chr17-59362001-59362687	chr17	59362001	59362687	AGGCCATGCAGAGGGGA	-0.800626	0.263684	MACS_peak_1330	chr17	59361548	59362948	686	49	MACS_peak_1330	chr17	59361518	59362977	204.92	chr17-59362001-59362687	47.0185
chr17-58922870-58923456	chr17	58922870	58923456	GTGGGGCAGGGGCCGAG	2.16448	9.05315e-09	MACS_peak_1329	chr17	58922615	58923115	245	49	MACS_peak_1329	chr17	58922583	58923147	177.8	chr17-58922870-58923456	49.1135
chr12-77463516-77464205	chr12	77463516	77464205	GCCTAGAGTGTCGCTGG	0.348314	0.321883	MACS_peak_718	chr12	77463960	77464460	245	49	MACS_peak_718	chr12	77464090	77464329	60.43	chr12-77463516-77464205	48.1172
chr5-104960752-104961271	chr5	104960752	104961271	CGTGGGTGTTGTAGTGT	-0.219622	0.824329	MACS_peak_2684	chr5	104961025	104961525	246	49.2	MACS_peak_2684	chr5	104961162	104961388	67.03	chr5-104960752-104961271	48.2301
chr4-101318204-101318682	chr4	101318204	101318682	TCGCTACAGCAGGCCGG	0.71693	0.0637657	MACS_peak_2359	chr4	101317950	101318450	246	49.2	MACS_peak_2359	chr4	101318082	101318317	65.42	chr4-101318204-101318682	48.0851
chr2-151150458-151150933	chr2	151150458	151150933	TGGGACACGCTGACTGT	3.30967	1.61891e-17	MACS_peak_1746	chr2	151150204	151150704	246	49.2	MACS_peak_1746	chr2	151150275	151150633	71.2	chr2-151150458-151150933	48.8827
chr2-86653529-86654051	chr2	86653529	86654051	AGACATCCTTGTTATGC	0.881259	0.0251603	MACS_peak_1676	chr2	86653275	86653775	246	49.2	MACS_peak_1676	chr2	86653334	86653716	125.84	chr2-86653529-86654051	48.9529
chr15-53864589-53865494	chr15	53864589	53865494	AAGCTTTCGGTGGCATA;TCGAAATTTGAAGAAGG	-0.0582043	0.77457	MACS_peak_1035	chr15	53864335	53864835	246	49.2	MACS_peak_1035	chr15	53864407	53864763	80.88	chr15-53864589-53865494	48.8764
chr1-69520603-69521154	chr1	69520603	69521154	GCAGGGAAGGACGTGGA	2.4137	6.15432e-06	MACS_peak_77	chr1	69520908	69521408	246	49.2	MACS_peak_77	chr1	69520913	69521403	111.2	chr1-69520603-69521154	49.1837
chr1-182730713-182731655	chr1	182730713	182731655	GCTGAATACCGGGGGCA	1.38886	0.00968951	MACS_peak_191	chr1	182730332	182731082	369	49.2	MACS_peak_191	chr1	182730292	182731122	453.43	chr1-182730713-182731655	49.2771
chr1-182613074-182613583	chr1	182613074	182613583	GGACGGGTTCGAAGGCG	0.130031	0.787024	MACS_peak_189	chr1	182612820	182613320	246	49.2	MACS_peak_189	chr1	182612817	182613323	106.9	chr1-182613074-182613583	49.2095
chr20-52936416-52937443	chr20	52936416	52937443	TTTCCCCGGTGATCTAG	-0.774042	0.0164782	MACS_peak_1954	chr20	52937123	52937773	320	49.2308	MACS_peak_1954	chr20	52937097	52937798	63.93	chr20-52936416-52937443	49.3581
chr9-128973342-128973907	chr9	128973342	128973907	CAGTATCGGGTGCAGGG	-0.381756	0.536126	MACS_peak_3556	chr9	128973660	128974160	247	49.4	MACS_peak_3556	chr9	128973798	128974022	61.24	chr9-128973342-128973907	48.6607
chr9-97960104-97960600	chr9	97960104	97960600	CGGTAAGGACGGAGTCG	2.6445	1.99069e-07	MACS_peak_3494	chr9	97959851	97960351	247	49.4	MACS_peak_3494	chr9	97959831	97960371	188.62	chr9-97960104-97960600	49.4444
chr7-11122130-11122691	chr7	11122130	11122691	CTGGACCTGGTGTTCGG	4.03198	1.51789e-29	MACS_peak_3097	chr7	11122444	11122944	247	49.4	MACS_peak_3097	chr7	11122521	11122866	154.6	chr7-11122130-11122691	49.2754
chr16-79474299-79474778	chr16	79474299	79474778	GGGATGGGGGCCTGGTC	0.0584919	0.956009	MACS_peak_1223	chr16	79474531	79475031	247	49.4	MACS_peak_1223	chr16	79474682	79474880	62.6	chr16-79474299-79474778	48.4848
chr3-63995753-63996396	chr3	63995753	63996396	CGCCAGGTGGGGTCGTG	-0.169216	0.641166	MACS_peak_2121	chr3	63995558	63996858	643	49.4615	MACS_peak_2121	chr3	63995518	63996897	66.06	chr3-63995753-63996396	46.628
chr17-59703776-59704841	chr17	59703776	59704841	GTTCGACTTGAGGAAAG	-0.29443	0.413606	MACS_peak_1335	chr17	59703280	59705430	1065	49.5349	MACS_peak_1335	chr17	59703249	59705461	147.58	chr17-59703776-59704841	48.1465
chr8-128807227-128807890	chr8	128807227	128807890	CCAACTTGGATTTCCAT	-0.00151043	0.997801	MACS_peak_3412	chr8	128807345	128808445	545	49.5455	MACS_peak_3412	chr8	128807314	128808476	189.13	chr8-128807227-128807890	49.5697
chr20-46621218-46621843	chr20	46621218	46621843	CGGGGCCGTTGAACCGG	-1.09394	9.77927e-06	MACS_peak_1946	chr20	46621298	46622398	545	49.5455	MACS_peak_1946	chr20	46621272	46622423	730.37	chr20-46621218-46621843	49.609
chr17-59362203-59362897	chr17	59362203	59362897	TGGCGGTGGGTAGTGCG;AAGAGGTTAAGGATCTT	3.13543	7.07719e-33	MACS_peak_1330	chr17	59361548	59362948	694	49.5714	MACS_peak_1330	chr17	59361518	59362977	204.92	chr17-59362203-59362897	47.5668
chr9-98699520-98700071	chr9	98699520	98700071	GAAGTTAATCGCTACCA;CAGGGAGGCGAGTGTTG	3.29934	1.6724e-31	MACS_peak_3496	chr9	98699268	98699768	248	49.6	MACS_peak_3496	chr9	98699253	98699783	167.92	chr9-98699520-98700071	49.6226
chr8-89793545-89794299	chr8	89793545	89794299	AGGTGGTAGACGTCGGG	-0.386095	0.201886	MACS_peak_3323	chr8	89793293	89793793	248	49.6	MACS_peak_3323	chr8	89793423	89793662	64.71	chr8-89793545-89794299	48.954
chr7-110237969-110238742	chr7	110237969	110238742	GTAGGTATAGCTTAATC	0.320601	0.650312	MACS_peak_3189	chr7	110237717	110238217	248	49.6	MACS_peak_3189	chr7	110237839	110238095	73	chr7-110237969-110238742	49.2188
chr16-71347828-71348430	chr16	71347828	71348430	GCAGGGATCCCCTCGGG	-0.18121	0.663076	MACS_peak_1180	chr16	71348182	71348682	248	49.6	MACS_peak_1180	chr16	71348299	71348565	65.12	chr16-71347828-71348430	49.2481
chr1-182730710-182731311	chr1	182730710	182731311	GTGTGTACGTCGGAGGA	0.139423	0.787752	MACS_peak_191	chr1	182730332	182731082	372	49.6	MACS_peak_191	chr1	182730292	182731122	453.43	chr1-182730710-182731311	49.6386
chr20-53365743-53366445	chr20	53365743	53366445	ACTGCCCGGGCGGGAGT;TAGGTGTGTACTGTGCA	-0.272216	0.17489	MACS_peak_1959	chr20	53365088	53366388	645	49.6154	MACS_peak_1959	chr20	53365044	53366431	65.2	chr20-53365743-53366445	49.6035
chr20-53365742-53366596	chr20	53365742	53366596	GTGGGAAACAGGGGCAG	-0.355246	0.382722	MACS_peak_1959	chr20	53365088	53366388	646	49.6923	MACS_peak_1959	chr20	53365044	53366431	65.2	chr20-53365742-53366596	49.6756
chr3-6174006-6174644	chr3	6174006	6174644	GAGGTTTCCATACAGGG;TCCCCCTAAGTTCAGCT	0.235607	0.41235	MACS_peak_2054	chr3	6174395	6174895	249	49.8	MACS_peak_2054	chr3	6174576	6174713	71.93	chr3-6174006-6174644	49.635
chr1-114878517-114879113	chr1	114878517	114879113	GGGAGCGGTAGCCTCAC	0.079995	0.831129	MACS_peak_116	chr1	114878864	114879364	249	49.8	MACS_peak_116	chr1	114878869	114879358	78.08	chr1-114878517-114879113	49.8978
chr12-125423124-125423498	chr12	125423124	125423498	GTTTACCCGTAGTGGTC	3.29013	5.96487e-13	MACS_peak_809	chr12	125423029	125423779	374	49.8667	MACS_peak_809	chr12	125422993	125423815	532.73	chr12-125423124-125423498	45.4988
chr1-181104002-181104551	chr1	181104002	181104551	TCTTGATCAGGCAGGAG	3.20119	9.4381e-15	MACS_peak_185	chr1	181103754	181104854	549	49.9091	MACS_peak_185	chr1	181103720	181104888	3100	chr1-181104002-181104551	47.0034
chr4-114624221-114624817	chr4	114624221	114624817	GCTGGGAAAGGGGTGGG;TCGCGCTGGCGGGATCC	-0.311457	0.481202	MACS_peak_2374	chr4	114623971	114624471	250	50	MACS_peak_2374	chr4	114624095	114624346	63.28	chr4-114624221-114624817	49.8008
chr3-192031020-192031636	chr3	192031020	192031636	TTTGTGTGGGTATATGA	-0.979486	0.0482459	MACS_peak_2249	chr3	192031386	192031886	250	50	MACS_peak_2249	chr3	192031518	192031754	65.48	chr3-192031020-192031636	50
chr17-57015108-57015676	chr17	57015108	57015676	GGGTCAGGGGCGGAACG	-0.737018	0.0454976	MACS_peak_1318	chr17	57015276	57016076	400	50	MACS_peak_1318	chr17	57015248	57016103	60.24	chr17-57015108-57015676	50.0585
chr15-54218622-54219344	chr15	54218622	54219344	GACCTGAAGAGAGTGAC;GATAGCCGGAGGGCGGT	0.305314	0.329907	MACS_peak_1039	chr15	54218372	54218872	250	50	MACS_peak_1039	chr15	54218450	54218793	59.81	chr15-54218622-54219344	49.8542
chr12-124757808-124758325	chr12	124757808	124758325	TTAGGGTGGGGCTGTGG	-0.0312369	0.972583	MACS_peak_807	chr12	124758075	124758575	250	50	MACS_peak_807	chr12	124758113	124758537	73.58	chr12-124757808-124758325	50
chr12-110246466-110247163	chr12	110246466	110247163	GACGGTACACGAGCCAA	-0.141968	0.767558	MACS_peak_790	chr12	110246216	110246716	250	50	MACS_peak_790	chr12	110246385	110246547	60.25	chr12-110246466-110247163	50
chr10-29258963-29259459	chr10	29258963	29259459	ACAGTGGTCGATTGGTA	-0.491602	0.326648	MACS_peak_340	chr10	29258713	29259213	250	50	MACS_peak_340	chr10	29258824	29259102	72.87	chr10-29258963-29259459	50
chr8-133037227-133037724	chr8	133037227	133037724	CGACTTTCAGCGAAGGA	3.87742	4.43458e-23	MACS_peak_3421	chr8	133037473	133037973	251	50.2	MACS_peak_3421	chr8	133037443	133038003	155.19	chr8-133037227-133037724	50.1786
chr5-82399637-82400324	chr5	82399637	82400324	GGGGCTGAGTGGGGCAG	-0.296556	0.557757	MACS_peak_2636	chr5	82399388	82399888	251	50.2	MACS_peak_2636	chr5	82399488	82399787	77.01	chr5-82399637-82400324	50.1672
chr4-77968843-77969630	chr4	77968843	77969630	ATCTCGTGGGGCTGGAG	-0.334598	0.714895	MACS_peak_2334	chr4	77969379	77969879	251	50.2	MACS_peak_2334	chr4	77969532	77969726	62.52	chr4-77968843-77969630	50.5155
chr3-125838441-125839002	chr3	125838441	125839002	GGGGGTCGGGAGCGGTG;CAATTTAGATCGTCGCG	-0.499302	0.41106	MACS_peak_2192	chr3	125838192	125838692	251	50.2	MACS_peak_2192	chr3	125838279	125838604	94.91	chr3-125838441-125839002	50.1538
chr17-58922864-58923839	chr17	58922864	58923839	AGTCGGGAGAGAGAACA	1.62263	1.97068e-06	MACS_peak_1329	chr17	58922615	58923115	251	50.2	MACS_peak_1329	chr17	58922583	58923147	177.8	chr17-58922864-58923839	50.1773
chr17-59362245-59363103	chr17	59362245	59363103	TCAGTGGAGTTAGCCAG	0.228952	0.536262	MACS_peak_1330	chr17	59361548	59362948	703	50.2143	MACS_peak_1330	chr17	59361518	59362977	204.92	chr17-59362245-59363103	50.1714
chr3-63996095-63996748	chr3	63996095	63996748	TGGAGTCATGAAGCCCG	0.403661	0.446389	MACS_peak_2121	chr3	63995558	63996858	653	50.2308	MACS_peak_2121	chr3	63995518	63996897	66.06	chr3-63996095-63996748	47.3532
chr7-126447336-126447964	chr7	126447336	126447964	GTCCGCTGCCATCGGGG	-0.000375187	0.999468	MACS_peak_3200	chr7	126447088	126447588	252	50.4	MACS_peak_3200	chr7	126447217	126447458	69	chr7-126447336-126447964	50.6224
chr5-149144390-149144852	chr5	149144390	149144852	CCTGGGGCAAGCGGCTA	3.82136	1.53126e-29	MACS_peak_2775	chr5	149144600	149145100	252	50.4	MACS_peak_2775	chr5	149144695	149145005	61.27	chr5-149144390-149144852	50.6452
chr5-61576075-61576594	chr5	61576075	61576594	CGGGCGGTGACCAACTG	3.05402	2.46018e-17	MACS_peak_2600	chr5	61575827	61576327	252	50.4	MACS_peak_2600	chr5	61575786	61576368	260.03	chr5-61576075-61576594	50.3436
chr10-9166295-9166820	chr10	9166295	9166820	CTCTCAGCTTTTTAGCT;GTACTTTAGGGAGGGGT	0.0218684	0.249774	MACS_peak_310	chr10	9166568	9167068	252	50.4	MACS_peak_310	chr10	9166654	9166981	64.74	chr10-9166295-9166820	50.7645
chr2-113882723-113883257	chr2	113882723	113883257	CCGTCGGAAATGTGGGG	0.264482	0.259171	MACS_peak_357739	chr2	113882475	113882975	252	50.4	no_overlap	.	.	.	.	.	.
chr7-25010995-25011909	chr7	25010995	25011909	GAAGTGGGGCGAGGTTG	3.18163	3.21513e-11	MACS_peak_3107	chr7	25010748	25011248	253	50.6	MACS_peak_3107	chr7	25010854	25011141	59.84	chr7-25010995-25011909	50.8711
chr6-52288831-52289388	chr6	52288831	52289388	AGTTGTAATTACCAGGG	0.601449	0.20388	MACS_peak_2910	chr6	52289135	52289635	253	50.6	MACS_peak_2910	chr6	52289277	52289493	67.96	chr6-52288831-52289388	51.3889
chr5-43906553-43907090	chr5	43906553	43907090	GGGGGCGGGCAATTAAG	-0.344215	0.278588	MACS_peak_2549	chr5	43906306	43906806	253	50.6	MACS_peak_2549	chr5	43906314	43906797	73.58	chr5-43906553-43907090	50.5176
chr13-75988596-75989269	chr13	75988596	75989269	TCAATCAGGTGGGAGGT	-0.22932	0.595038	MACS_peak_857	chr13	75988349	75988849	253	50.6	MACS_peak_857	chr13	75988519	75988679	66.04	chr13-75988596-75989269	51.875
chr20-52823776-52824239	chr20	52823776	52824239	TCTTGTGAGAACTTAGA	0.0563581	0.948063	PFDN4	chr20	52823986	52824486	253	50.6	no_overlap	.	.	.	.	.	.
chr3-64770998-64771527	chr3	64770998	64771527	GGGTGACCGGGCTGAGA	-0.581043	0.190413	MACS_peak_2122	chr3	64770603	64771403	405	50.625	MACS_peak_2122	chr3	64770575	64771431	100.22	chr3-64770998-64771527	50.5841
chr1-107436710-107437202	chr1	107436710	107437202	CGCAAGGCGAGGGGGGG	0.245059	0.637177	MACS_peak_101	chr1	107436340	107437090	380	50.6667	MACS_peak_101	chr1	107436293	107437137	96.04	chr1-107436710-107437202	50.5924
chr7-80540727-80541549	chr7	80540727	80541549	CTCTAGTCGAGTGTCTG	1.20525	0.02173	MACS_peak_3161	chr7	80540481	80540981	254	50.8	MACS_peak_3161	chr7	80540506	80540955	116.13	chr7-80540727-80541549	50.7795
chr6-30261767-30262706	chr6	30261767	30262706	TTTACTAGGAGGGACTT	-0.419288	0.403188	MACS_peak_2861	chr6	30261521	30262021	254	50.8	MACS_peak_2861	chr6	30261607	30261934	61.29	chr6-30261767-30262706	51.0703
chr5-42848449-42849010	chr5	42848449	42849010	CGTGCGTTGGACAGTAG	0.389549	0.355991	MACS_peak_2522	chr5	42848756	42849256	254	50.8	MACS_peak_2522	chr5	42848833	42849178	66.77	chr5-42848449-42849010	51.3043
chr5-42328243-42328961	chr5	42328243	42328961	TGTGTTGGGAATTACTG	0.267671	0.303718	MACS_peak_2508	chr5	42327997	42328497	254	50.8	MACS_peak_2508	chr5	42328166	42328328	65.38	chr5-42328243-42328961	52.4691
chr3-89046598-89047366	chr3	89046598	89047366	ATGTGTATTGTTCTCAG	3.07433	2.72483e-20	MACS_peak_2157	chr3	89046352	89046852	254	50.8	MACS_peak_2157	chr3	89046402	89046801	102.11	chr3-89046598-89047366	50.8772
chr16-76631806-76632324	chr16	76631806	76632324	TTTTTGGGCGAAGGTGG	0.226846	0.663267	MACS_peak_1209	chr16	76631560	76632060	254	50.8	MACS_peak_1209	chr16	76631699	76631921	67.68	chr16-76631806-76632324	51.8018
chr12-77464206-77464768	chr12	77464206	77464768	CGTTACTCGTGGGACTG	-1.21841	2.73537e-07	MACS_peak_718	chr12	77463960	77464460	254	50.8	MACS_peak_718	chr12	77464090	77464329	60.43	chr12-77464206-77464768	51.4644
chr12-15687769-15688369	chr12	15687769	15688369	CCGGCTTATTGTGAGGC	0.537958	0.238609	MACS_peak_616	chr12	15688115	15688615	254	50.8	MACS_peak_616	chr12	15688203	15688527	94.24	chr12-15687769-15688369	51.2346
chr11-79949052-79949617	chr11	79949052	79949617	CTGTTTTCGGGTGGTGA	-1.29848	3.26046e-08	MACS_peak_547	chr11	79949363	79949863	254	50.8	MACS_peak_547	chr11	79949491	79949735	60.86	chr11-79949052-79949617	51.6393
chr1-111756310-111757092	chr1	111756310	111757092	CAGCAGTGGGTATTAGG	-0.090577	0.808127	MACS_peak_109	chr1	111756838	111757338	254	50.8	MACS_peak_109	chr1	111757005	111757171	74.77	chr1-111756310-111757092	52.4096
chr20-53365196-53365858	chr20	53365196	53365858	AGGGATTGGAGAGTGGG	-0.611521	0.184482	MACS_peak_1959	chr20	53365088	53366388	662	50.9231	MACS_peak_1959	chr20	53365044	53366431	65.2	chr20-53365196-53365858	47.7289
chr20-53365294-53365956	chr20	53365294	53365956	GTCGGAGGGCTTGGAGT	0.0348252	0.956341	MACS_peak_1959	chr20	53365088	53366388	662	50.9231	MACS_peak_1959	chr20	53365044	53366431	65.2	chr20-53365294-53365956	47.7289
chr9-99235624-99236228	chr9	99235624	99236228	CACGGGGTCCGTCCGGG;GCGTCCTCGTGAGAGCC	0.293027	0.472628	MACS_peak_3497	chr9	99235973	99236473	255	51	MACS_peak_3497	chr9	99236125	99236320	60.43	chr9-99235624-99236228	52.8205
chr7-2192195-2193003	chr7	2192195	2193003	GTATAGTGGACGTTAAG	0.0342183	0.946946	MACS_peak_3082	chr7	2191950	2192450	255	51	MACS_peak_3082	chr7	2192142	2192258	65.1	chr7-2192195-2193003	54.3103
chr2-171422760-171423478	chr2	171422760	171423478	AAATGATAAATAGGCTG	-0.0812762	0.856292	MACS_peak_1778	chr2	171422515	171423015	255	51	MACS_peak_1778	chr2	171422653	171422876	61.54	chr2-171422760-171423478	52.0179
chr12-70914406-70914925	chr12	70914406	70914925	GATGGGACGGCATGTAG	0.155575	0.877563	MACS_peak_699	chr12	70914670	70915170	255	51	MACS_peak_699	chr12	70914678	70915162	156.36	chr12-70914406-70914925	51.0331
chr11-17098506-17099375	chr11	17098506	17099375	CAAAGGGGGTCGCCTGG	-0.00927853	0.994432	RPS13	chr11	17099120	17099620	255	51	no_overlap	.	.	.	.	.	.
chr4-123719419-123719751	chr4	123719419	123719751	AAGAGGACGGGGATGTG	1.25833	0.043478	MACS_peak_2387	chr4	123719143	123719793	332	51.0769	MACS_peak_2387	chr4	123719116	123719819	597.14	chr4-123719419-123719751	47.2262
chr20-53365471-53366136	chr20	53365471	53366136	GGAGGTGTGGGCAGAGT	-0.409002	0.17245	MACS_peak_1959	chr20	53365088	53366388	665	51.1538	MACS_peak_1959	chr20	53365044	53366431	65.2	chr20-53365471-53366136	47.9452
chr9-123943028-123943812	chr9	123943028	123943812	AGCGACGCGTTCGAACG	-0.0274514	0.968661	MACS_peak_3547	chr9	123943556	123944056	256	51.2	MACS_peak_3547	chr9	123943655	123943956	60.78	chr9-123943028-123943812	52.1595
chr6-48861008-48861842	chr6	48861008	48861842	GAGGAGTGGCGCATGAC	0.673644	0.0256186	MACS_peak_2903	chr6	48861586	48862086	256	51.2	MACS_peak_2903	chr6	48861715	48861957	64.58	chr6-48861008-48861842	52.4793
chr3-105091274-105091530	chr3	105091274	105091530	CTAGGATAATTGGTACA	3.69252	5.22072e-32	MACS_peak_2173	chr3	105091156	105091656	256	51.2	MACS_peak_2173	chr3	105091122	105091689	111.8	chr3-105091274-105091530	45.1499
chr5-112258380-112258724	chr5	112258380	112258724	TGATTGTTGCGCGTTTG	-0.166889	0.554206	REEP5	chr5	112258136	112258636	256	51.2	no_overlap	.	.	.	.	.	.
chr3-63995797-63996463	chr3	63995797	63996463	GTGTCGCCCATGTACGG	0.38684	0.434323	MACS_peak_2121	chr3	63995558	63996858	666	51.2308	MACS_peak_2121	chr3	63995518	63996897	66.06	chr3-63995797-63996463	48.2959
chr20-53365672-53366340	chr20	53365672	53366340	GTGTACCACGCAGACCG	0.247779	0.605838	MACS_peak_1959	chr20	53365088	53366388	668	51.3846	MACS_peak_1959	chr20	53365044	53366431	65.2	chr20-53365672-53366340	48.1615
chr5-42963742-42964184	chr5	42963742	42964184	GTTAGATGTTCGGGCTT	0.401633	0.324598	MACS_peak_2524	chr5	42963499	42963999	257	51.4	MACS_peak_2524	chr5	42963547	42963951	66.21	chr5-42963742-42964184	51.7327
chr3-63819881-63820398	chr3	63819881	63820398	GTTTGGTAAGGTGCTGT	-1.07302	0.0284436	MACS_peak_2120	chr3	63819638	63820138	257	51.4	MACS_peak_2120	chr3	63819733	63820043	68.31	chr3-63819881-63820398	52.2581
chr15-54602229-54602783	chr15	54602229	54602783	TAGACTGGCTGGCCCGG	-0.501091	0.173451	MACS_peak_1045	chr15	54601986	54602486	257	51.4	MACS_peak_1045	chr15	54602130	54602342	67.08	chr15-54602229-54602783	53.3019
chr3-63995591-63996260	chr3	63995591	63996260	ATGGCGAGCACGTGTGG;GAGCTTTGGCCCAGAAG	0.221959	0.784136	MACS_peak_2121	chr3	63995558	63996858	669	51.4615	MACS_peak_2121	chr3	63995518	63996897	66.06	chr3-63995591-63996260	48.5134
chr20-53365719-53366420	chr20	53365719	53366420	TTCGGTGGAATTTAGGG	0.521179	0.188983	MACS_peak_1959	chr20	53365088	53366388	669	51.4615	MACS_peak_1959	chr20	53365044	53366431	65.2	chr20-53365719-53366420	50.5407
chr20-53365719-53366485	chr20	53365719	53366485	AGGGGGGTCGGGGATGT	-0.698228	0.213936	MACS_peak_1959	chr20	53365088	53366388	669	51.4615	MACS_peak_1959	chr20	53365044	53366431	65.2	chr20-53365719-53366485	51.3338
chr15-69744694-69745251	chr15	69744694	69745251	TCCCCCTAGGCCTGCAG	0.338383	0.711141	MACS_peak_1078	chr15	69744993	69745493	258	51.6	MACS_peak_1078	chr15	69745174	69745312	102.46	chr15-69744694-69745251	55.7971
chr9-42483442-42484535	chr9	42483442	42484535	GGGATCAAATTTGGTTC	-0.0761411	0.916956	neg_region_9	chr9	42483200	42483700	258	51.6	no_overlap	.	.	.	.	.	.
chr1-107364301-107364818	chr1	107364301	107364818	GGTCGTGGTCTCGGGAG	0.168796	0.779729	MACS_peak_99	chr1	107363910	107364910	517	51.7	MACS_peak_99	chr1	107363877	107364942	66.63	chr1-107364301-107364818	48.5446
chr20-53365266-53365939	chr20	53365266	53365939	GTGACATCAGGTTGGTG	0.33741	0.362615	MACS_peak_1959	chr20	53365088	53366388	673	51.7692	MACS_peak_1959	chr20	53365044	53366431	65.2	chr20-53365266-53365939	48.522
chr5-162954123-162954766	chr5	162954123	162954766	GTGTAGGCATACCACCC	-0.763441	0.00852801	MACS_peak_2800	chr5	162954507	162955007	259	51.8	MACS_peak_2800	chr5	162954642	162954872	65.42	chr5-162954123-162954766	53.913
chr5-42839069-42839596	chr5	42839069	42839596	CTCCTCATCTAAGCGTG	0.272269	0.579718	MACS_peak_2521	chr5	42838828	42839328	259	51.8	MACS_peak_2521	chr5	42838905	42839251	73.44	chr5-42839069-42839596	52.6012
chr2-193409031-193409649	chr2	193409031	193409649	CTGCCGGGCAGGTAACG	4.59772	3.67768e-39	MACS_peak_1822	chr2	193409390	193409890	259	51.8	MACS_peak_1822	chr2	193409456	193409823	86.92	chr2-193409031-193409649	52.5886
chr10-15166046-15166815	chr10	15166046	15166815	TTTCGTGTCGGTACCTA	2.47647	2.12774e-12	MACS_peak_318	chr10	15165805	15166305	259	51.8	MACS_peak_318	chr10	15165817	15166293	94.53	chr10-15166046-15166815	51.8908
chr10-9166002-9166827	chr10	9166002	9166827	GGGGGAAGAGTACCGTG	0.291524	0.362187	MACS_peak_310	chr10	9166568	9167068	259	51.8	MACS_peak_310	chr10	9166654	9166981	64.74	chr10-9166002-9166827	52.9052
chr1-151955383-151955691	chr1	151955383	151955691	AGTGGAGTGGAGGGGGA	-0.766585	0.00318856	MACS_peak_135	chr1	151955432	151955932	259	51.8	MACS_peak_135	chr1	151955409	151955955	63.01	chr1-151955383-151955691	51.6484
chr8-124856649-124857299	chr8	124856649	124857299	GTACTCGCCATGAGAGT	4.10523	3.82667e-24	MACS_peak_3402	chr8	124856559	124857809	650	52	MACS_peak_3402	chr8	124856525	124857842	647.49	chr8-124856649-124857299	49.3546
chr5-128217657-128217917	chr5	128217657	128217917	GCCCATTCTGTGTGGTC	-0.369178	0.681288	MACS_peak_2734	chr5	128217591	128218091	260	52	MACS_peak_2734	chr5	128217708	128217974	61.22	chr5-128217657-128217917	78.5714
chr3-194907917-194908507	chr3	194907917	194908507	CGGTCTCACTCGTAGTT	-0.330637	0.395091	MACS_peak_2255	chr3	194908247	194908747	260	52	MACS_peak_2255	chr3	194908231	194908763	230.27	chr3-194907917-194908507	51.8797
chr12-81278280-81278867	chr12	81278280	81278867	GTTCCGTAGGCCCAGAT	0.448172	0.221261	MACS_peak_731	chr12	81278040	81278540	260	52	MACS_peak_731	chr12	81278203	81278377	69.11	chr12-81278280-81278867	55.7471
chr20-53365711-53366539	chr20	53365711	53366539	GTTGACAGTGCGCAGGG	-0.605044	0.0227842	MACS_peak_1959	chr20	53365088	53366388	677	52.0769	MACS_peak_1959	chr20	53365044	53366431	65.2	chr20-53365711-53366539	51.9106
chr20-53365550-53366228	chr20	53365550	53366228	TAGGCATTCTATGGTGA	0.0824353	0.939846	MACS_peak_1959	chr20	53365088	53366388	678	52.1538	MACS_peak_1959	chr20	53365044	53366431	65.2	chr20-53365550-53366228	48.8825
chrX-140351132-140351660	chrX	140351132	140351660	TTTGTGATTTGGAGATG	-0.44164	0.377572	MACS_peak_3625	chrX	140351399	140351899	261	52.2	MACS_peak_3625	chrX	140351511	140351787	59.92	chrX-140351132-140351660	53.9855
chr1-151955649-151955910	chr1	151955649	151955910	AACTGGTCGCGAAAGGG	0.175868	0.606052	MACS_peak_135	chr1	151955432	151955932	261	52.2	MACS_peak_135	chr1	151955409	151955955	63.01	chr1-151955649-151955910	47.8022
chr1-199917874-199918372	chr1	199917874	199918372	GGGTGGCGGCGGACCGG	2.83865	7.0552e-13	MACS_peak_239	chr1	199918058	199918658	314	52.3333	MACS_peak_239	chr1	199918008	199918707	501.18	chr1-199917874-199918372	52.0744
chr6-31304571-31305098	chr6	31304571	31305098	TGGCGATTAGTCGCGGG;CGTGGAAGCTTTTCGCT	0.144013	0.686291	MACS_peak_2867	chr6	31304810	31305360	288	52.3636	MACS_peak_2867	chr6	31304772	31305397	251.71	chr6-31304571-31305098	52.16
chr9-99235501-99236235	chr9	99235501	99236235	GTTTGTGAGATTGGCTG	-0.172963	0.73122	MACS_peak_3497	chr9	99235973	99236473	262	52.4	MACS_peak_3497	chr9	99236125	99236320	60.43	chr9-99235501-99236235	56.4103
chr8-127526419-127526916	chr8	127526419	127526916	GGGCAGGTGGGGCGGGG	0.138801	0.879533	MACS_peak_3410	chr8	127526181	127526681	262	52.4	MACS_peak_3410	chr8	127526255	127526606	72.5	chr8-127526419-127526916	53.2764
chr5-44207296-44208151	chr5	44207296	44208151	AAAACCTGGATTTACGA	0.246166	0.525632	MACS_peak_2554	chr5	44207889	44208389	262	52.4	MACS_peak_2554	chr5	44208014	44208264	62.44	chr5-44207296-44208151	54.8
chr2-215227578-215228203	chr2	215227578	215228203	TCGTAGGAGTTCTGCGG;GCATACAAGCGCAGCAG	-0.129007	0.858078	MACS_peak_1859	chr2	215227340	215227840	262	52.4	MACS_peak_1859	chr2	215227460	215227720	85.93	chr2-215227578-215228203	54.6154
chr2-152261834-152262430	chr2	152261834	152262430	GGGGTTATGAAACGATC	-0.736437	0.197955	MACS_peak_1751	chr2	152261596	152262096	262	52.4	MACS_peak_1751	chr2	152261687	152262004	61.61	chr2-152261834-152262430	53.6278
chr2-100737649-100738016	chr2	100737649	100738016	GTATTCTGTAAGTCGCT	-0.159168	0.66975	MACS_peak_1687	chr2	100737411	100737911	262	52.4	MACS_peak_1687	chr2	100737546	100737776	60.89	chr2-100737649-100738016	55.2174
chr2-28395342-28395718	chr2	28395342	28395718	TTGGGACTGCGACGGGT	3.59785	9.04543e-21	MACS_peak_1600	chr2	28395104	28395604	262	52.4	MACS_peak_1600	chr2	28395085	28395623	178.05	chr2-28395342-28395718	52.2305
chr16-72249825-72250364	chr16	72249825	72250364	CTCTACCAGTGGTGGTG	-0.268094	0.599967	MACS_peak_1184	chr16	72249587	72250087	262	52.4	MACS_peak_1184	chr16	72249702	72249972	67.08	chr16-72249825-72250364	54.4444
chr12-81288946-81289554	chr12	81288946	81289554	TTTAGTTCTTATGTGGG	-1.28133	8.96103e-06	MACS_peak_732	chr12	81289292	81289792	262	52.4	MACS_peak_732	chr12	81289418	81289666	62.37	chr12-81288946-81289554	54.8387
chr20-46621821-46622608	chr20	46621821	46622608	GTATGAGTGTTGGGCGG	0.0265426	0.957697	MACS_peak_1946	chr20	46621298	46622398	577	52.4545	MACS_peak_1946	chr20	46621272	46622423	730.37	chr20-46621821-46622608	52.3023
chr17-59362109-59362844	chr17	59362109	59362844	AGTGGTCATTGGTGGGG	3.07934	2.03219e-26	MACS_peak_1330	chr17	59361548	59362948	735	52.5	MACS_peak_1330	chr17	59361518	59362977	204.92	chr17-59362109-59362844	50.377
chr8-99056636-99057214	chr8	99056636	99057214	ACCACCCTTGTACGCTA	0.0397345	0.964882	MACS_peak_3337	chr8	99056951	99057451	263	52.6	MACS_peak_3337	chr8	99057044	99057357	89.21	chr8-99056636-99057214	54.3131
chr6-117709374-117709987	chr6	117709374	117709987	AAGCCAGGTGTATAGCA	0.653585	0.188852	MACS_peak_3025	chr6	117709724	117710224	263	52.6	MACS_peak_3025	chr6	117709875	117710073	60.74	chr6-117709374-117709987	56.5657
chr21-18980134-18980818	chr21	18980134	18980818	AGCTGTTAGGGAGGCAC	1.93922	2.39793e-06	MACS_peak_1981	chr21	18979897	18980397	263	52.6	MACS_peak_1981	chr21	18979925	18980369	128.37	chr21-18980134-18980818	52.9279
chr2-216002691-216003264	chr2	216002691	216003264	GCCTGGAGCAAGTCCTA	0.0345488	0.932169	MACS_peak_1860	chr2	216002454	216002954	263	52.6	MACS_peak_1860	chr2	216002437	216002971	132.74	chr2-216002691-216003264	52.4345
chr2-173043648-173044161	chr2	173043648	173044161	AATGCGTCGTTAAGAAT	0.157763	0.831876	MACS_peak_1784	chr2	173043411	173043911	263	52.6	MACS_peak_1784	chr2	173043538	173043783	69.03	chr2-173043648-173044161	55.102
chr15-55650545-55651068	chr15	55650545	55651068	AGTGGTAGCTGGCGACC	-0.141181	0.83326	MACS_peak_1050	chr15	55650805	55651305	263	52.6	MACS_peak_1050	chr15	55650871	55651239	66.09	chr15-55650545-55651068	53.5326
chr1-153170783-153171540	chr1	153170783	153171540	TCAGGTAGCTCCGACTA;GCGGCATGTGGCTGGGG	0.0668605	0.000191297	MACS_peak_137	chr1	153171277	153171777	263	52.6	MACS_peak_137	chr1	153171447	153171607	77.82	chr1-153170783-153171540	58.125
chr8-143897203-143897890	chr8	143897203	143897890	GTGTGCTGACGTCGGTT	2.86253	7.91582e-09	MACS_peak_3434	chr8	143896753	143897703	500	52.6316	MACS_peak_3434	chr8	143896726	143897730	973.53	chr8-143897203-143897890	52.49
chr3-63995723-63996408	chr3	63995723	63996408	GGACTTGCGACCCGTCA	0.537653	0.0119623	MACS_peak_2121	chr3	63995558	63996858	685	52.6923	MACS_peak_2121	chr3	63995518	63996897	66.06	chr3-63995723-63996408	49.6737
chr20-53365702-53366417	chr20	53365702	53366417	CAGGGCTGTGCACCTGG	-0.435075	0.0426025	MACS_peak_1959	chr20	53365088	53366388	686	52.7692	MACS_peak_1959	chr20	53365044	53366431	65.2	chr20-53365702-53366417	51.5501
chrX-28867894-28868264	chrX	28867894	28868264	TTAAGAGCCTTGTTACT;TTCTGTTTATACGTTAG	0.367795	0.128139	MACS_peak_3591	chrX	28867658	28868158	264	52.8	MACS_peak_3591	chrX	28867812	28868004	61.73	chrX-28867894-28868264	57.2917
chr8-138769362-138769849	chr8	138769362	138769849	GCGCGATGAGCGCGGAA	2.80077	1.74708e-16	MACS_peak_3427	chr8	138769585	138770085	264	52.8	MACS_peak_3427	chr8	138769718	138769951	63.95	chr8-138769362-138769849	56.2232
chr8-127526417-127527144	chr8	127526417	127527144	ATTGGAATTATTCGTCC	0.0212128	0.981535	MACS_peak_3410	chr8	127526181	127526681	264	52.8	MACS_peak_3410	chr8	127526255	127526606	72.5	chr8-127526417-127527144	53.8462
chr7-134529747-134530324	chr7	134529747	134530324	GGAAGACGGGGACGAAA	-0.597729	0.0608046	MACS_peak_3211	chr7	134530060	134530560	264	52.8	MACS_peak_3211	chr7	134530139	134530481	80.14	chr7-134529747-134530324	54.0936
chr7-126447324-126447794	chr7	126447324	126447794	TCGGGTGCTATGTAGAC	-0.353495	0.560649	MACS_peak_3200	chr7	126447088	126447588	264	52.8	MACS_peak_3200	chr7	126447217	126447458	69	chr7-126447324-126447794	55.6017
chr5-39831408-39832130	chr5	39831408	39832130	AGCTACTGTTGCGCAGT	0.211014	0.451411	MACS_peak_2477	chr5	39831172	39831672	264	52.8	MACS_peak_2477	chr5	39831311	39831532	64.62	chr5-39831408-39832130	56.1086
chr17-68640232-68640969	chr17	68640232	68640969	GCATCAATTTGACCTAC	-0.0120628	0.983672	MACS_peak_1369	chr17	68640705	68641205	264	52.8	MACS_peak_1369	chr17	68640838	68641072	76.59	chr17-68640232-68640969	55.9829
chr20-53365701-53366417	chr20	53365701	53366417	GGCAATGTCGGGCACCG	0.289311	0.519154	MACS_peak_1959	chr20	53365088	53366388	687	52.8462	MACS_peak_1959	chr20	53365044	53366431	65.2	chr20-53365701-53366417	51.6222
chr20-53365638-53366326	chr20	53365638	53366326	TATGTGTCGGTTAAGAT	-0.105618	0.888394	MACS_peak_1959	chr20	53365088	53366388	688	52.9231	MACS_peak_1959	chr20	53365044	53366431	65.2	chr20-53365638-53366326	49.6035
chr7-81252613-81253690	chr7	81252613	81253690	TCTGTGGAGAGTGATTT	4.13941	4.58587e-26	MACS_peak_3162	chr7	81252378	81252878	265	53	MACS_peak_3162	chr7	81252434	81252821	95.19	chr7-81252613-81253690	53.7468
chr6-74320405-74320771	chr6	74320405	74320771	TTTCGTCGGTTGTGGGC	-0.121095	0.771395	MACS_peak_2952	chr6	74320170	74320670	265	53	MACS_peak_2952	chr6	74320289	74320550	81.76	chr6-74320405-74320771	55.5556
chr5-163547113-163547869	chr5	163547113	163547869	TGGTAGTAATGGTAAAT	-0.108363	0.873491	MACS_peak_2802	chr5	163546878	163547378	265	53	MACS_peak_2802	chr5	163546880	163547376	244.62	chr5-163547113-163547869	53.0242
chr3-63995490-63996247	chr3	63995490	63996247	TACCATGTAATCACGAG	-0.202699	0.545657	MACS_peak_2121	chr3	63995558	63996858	689	53	MACS_peak_2121	chr3	63995518	63996897	66.06	chr3-63995490-63996247	52.8644
chr1-187608052-187608947	chr1	187608052	187608947	GTGGGGTAACGGTGAGG	2.73209	6.51129e-22	MACS_peak_202	chr1	187607817	187608317	265	53	MACS_peak_202	chr1	187607931	187608202	62.7	chr1-187608052-187608947	55.3506
chr20-53365195-53365885	chr20	53365195	53365885	GCTGCTCATGGACAACG	0.0944468	0.828285	MACS_peak_1959	chr20	53365088	53366388	690	53.0769	MACS_peak_1959	chr20	53365044	53366431	65.2	chr20-53365195-53365885	49.7477
chr6-149657147-149657898	chr6	149657147	149657898	CCCGTGTGTAAGAACGA;GTCGGAATTGGGTGCTG	-0.0626956	0.98146	MACS_peak_3067	chr6	149657632	149658132	266	53.2	MACS_peak_3067	chr6	149657759	149658004	77.79	chr6-149657147-149657898	56.7347
chr3-184535948-184536453	chr3	184535948	184536453	TTTTGTTACGTTACATC	-1.77461	5.75331e-05	MACS_peak_2241	chr3	184536187	184536687	266	53.2	MACS_peak_2241	chr3	184536315	184536558	64.44	chr3-184535948-184536453	56.7901
chr22-22107184-22107807	chr22	22107184	22107807	CGTCGGAGTAGAGTTGC	-0.411403	0.430107	MACS_peak_1998	chr22	22107541	22108041	266	53.2	MACS_peak_1998	chr22	22107676	22107906	66.4	chr22-22107184-22107807	56.9565
chr17-58922361-58922881	chr17	58922361	58922881	CGTATGCGGGGATGCCC	0.0270089	0.967109	MACS_peak_1329	chr17	58922615	58923115	266	53.2	MACS_peak_1329	chr17	58922583	58923147	177.8	chr17-58922361-58922881	52.8369
chr15-54602220-54602877	chr15	54602220	54602877	CAGTGACCTGTTACGAC	0.0516559	0.931366	MACS_peak_1045	chr15	54601986	54602486	266	53.2	MACS_peak_1045	chr15	54602130	54602342	67.08	chr15-54602220-54602877	57.5472
chr1-181068900-181069488	chr1	181068900	181069488	CGTAACGCCCTCCTTGT	0.366637	0.54696	MACS_peak_184	chr1	181068666	181069166	266	53.2	MACS_peak_184	chr1	181068703	181069129	81.24	chr1-181068900-181069488	53.7559
chr20-53365696-53366425	chr20	53365696	53366425	GTCTCCGGGTCAAGCAG;GTACGGAAACATGGGGT	0.392515	0.209707	MACS_peak_1959	chr20	53365088	53366388	692	53.2308	MACS_peak_1959	chr20	53365044	53366431	65.2	chr20-53365696-53366425	52.5595
chr19-58264611-58265082	chr19	58264611	58265082	ACACCGTGTCCAACACT	-0.121582	0.859109	MACS_peak_1549	chr19	58264378	58264878	267	53.4	MACS_peak_1549	chr19	58264480	58264775	65.62	chr19-58264611-58265082	55.5932
chr12-119343336-119344023	chr12	119343336	119344023	ATGTATATATGACATGT	-0.0591295	0.920271	MACS_peak_798	chr12	119343103	119343603	267	53.4	MACS_peak_798	chr12	119343241	119343465	67.35	chr12-119343336-119344023	57.5893
chr11-78867288-78867943	chr11	78867288	78867943	CTTGCACGGAGCTAGGG	0.0298766	0.96967	MACS_peak_543	chr11	78867055	78867555	267	53.4	MACS_peak_543	chr11	78867164	78867445	60.99	chr11-78867288-78867943	55.8719
chr6-36635010-36635503	chr6	36635010	36635503	CCTAGAGTAGTTTTGTT;TGGCTCGGGGTACCGGG	0.826268	0.0605652	MACS_peak_2875	chr6	36634754	36635304	294	53.4545	MACS_peak_2875	chr6	36634725	36635332	588.99	chr6-36635010-36635503	53.0478
chr8-108627863-108628466	chr8	108627863	108628466	CGGGAGAGAAAACCGGA	0.341541	0.600028	MACS_peak_3354	chr8	108628198	108628698	268	53.6	MACS_peak_3354	chr8	108628289	108628606	68.7	chr8-108627863-108628466	55.836
chr6-111427936-111428431	chr6	111427936	111428431	CTTGATTAGAGAATTGG	-0.17022	0.776696	MACS_peak_3018	chr6	111428163	111428663	268	53.6	MACS_peak_3018	chr6	111428214	111428611	115.57	chr6-111427936-111428431	54.6599
chr5-147451822-147452417	chr5	147451822	147452417	CATCGGGCTTAGAGCAG	-0.638739	0.328417	MACS_peak_2771	chr5	147452149	147452649	268	53.6	MACS_peak_2771	chr5	147452287	147452510	66.52	chr5-147451822-147452417	58.296
chr2-151768739-151769312	chr2	151768739	151769312	AGAGGAGCGGACGGGGC	-0.104554	0.815858	MACS_peak_1750	chr2	151768507	151769007	268	53.6	MACS_peak_1750	chr2	151768665	151768848	62.62	chr2-151768739-151769312	59.5628
chr17-54124572-54125087	chr17	54124572	54125087	AACCGTGGGCTGACCGA;TTATGGAGAGGAGGGAT	0.0858646	0.91748	MACS_peak_1306	chr17	54124340	54124840	268	53.6	MACS_peak_1306	chr17	54124501	54124678	62.04	chr17-54124572-54125087	59.887
chr16-31201167-31201646	chr16	31201167	31201646	AGTGCAGCGAGTGCCCG	-0.625348	0.0324321	MACS_peak_1149	chr16	31201378	31201878	268	53.6	MACS_peak_1149	chr16	31201373	31201883	98.45	chr16-31201167-31201646	53.5294
chr1-114878635-114879132	chr1	114878635	114879132	ACGTGGGGGGGGGAGGG	-0.0615936	0.906177	MACS_peak_116	chr1	114878864	114879364	268	53.6	MACS_peak_116	chr1	114878869	114879358	78.08	chr1-114878635-114879132	53.7832
chr9-97960082-97960851	chr9	97960082	97960851	GTTTTGCTTTTGCCCAA;GAAGGCGACATGCGGAC	0.988411	2.32883e-09	MACS_peak_3494	chr9	97959851	97960351	269	53.8	MACS_peak_3494	chr9	97959831	97960371	188.62	chr9-97960082-97960851	53.5185
chr7-126447319-126447939	chr7	126447319	126447939	GTCGTATAGTGGAAAGG	0.00805687	0.99455	MACS_peak_3200	chr7	126447088	126447588	269	53.8	MACS_peak_3200	chr7	126447217	126447458	69	chr7-126447319-126447939	57.6763
chr19-54675216-54675696	chr19	54675216	54675696	TGGCCAAAGAGTATTTT;TGCTCGTTGGGGAGACG	-0.512397	0.181551	MACS_peak_1541	chr19	54675427	54675927	269	53.8	MACS_peak_1541	chr19	54675505	54675848	65.35	chr19-54675216-54675696	55.6851
chr17-61869234-61869905	chr17	61869234	61869905	GAGGTGGGCCTGGGCGG	-0.00813557	0.984489	MACS_peak_1354	chr17	61869636	61870136	269	53.8	MACS_peak_1354	chr17	61869661	61870111	67.58	chr17-61869234-61869905	54.2222
chr15-56983616-56984118	chr15	56983616	56984118	GAAGCCTAGAATGCATA	0.34213	0.555126	MACS_peak_1061	chr15	56983385	56983885	269	53.8	MACS_peak_1061	chr15	56983558	56983712	81.01	chr15-56983616-56984118	62.3377
chr14-37289842-37290377	chr14	37289842	37290377	TGTCTCAACAGCTGGGG	3.39831	1.7007e-23	MACS_peak_887	chr14	37290108	37290608	269	53.8	MACS_peak_887	chr14	37290151	37290564	131.32	chr14-37289842-37290377	54.7215
chr10-29258944-29259222	chr10	29258944	29259222	GCTCGGTTGTTGGAAGG	-0.140621	0.644988	MACS_peak_340	chr10	29258713	29259213	269	53.8	MACS_peak_340	chr10	29258824	29259102	72.87	chr10-29258944-29259222	56.8345
chr19-8553692-8554209	chr19	8553692	8554209	GTCATTTAGTGAGATCC	-0.141394	0.715509	MACS_peak_1477	chr19	8553462	8553962	270	54	MACS_peak_1477	chr19	8553548	8553875	60.5	chr19-8553692-8554209	55.9633
chr15-73458351-73458899	chr15	73458351	73458899	ATTGGTAATTGGGGCAT	-0.167809	0.804784	MACS_peak_1086	chr15	73458052	73458702	351	54	MACS_peak_1086	chr15	73458002	73458751	418.91	chr15-73458351-73458899	53.4045
chr15-52955965-52956481	chr15	52955965	52956481	ACCGTAGAGCGCCTGGG	-0.0504388	0.939846	MACS_peak_1031	chr15	52955666	52956316	351	54	MACS_peak_1031	chr15	52955639	52956342	193.94	chr15-52955965-52956481	53.6273
chr5-69610704-69611270	chr5	69610704	69611270	GTATCAGAAGGCGGGCG	0.334317	0.515125	neg_region_59	chr5	69611000	69611500	270	54	no_overlap	.	.	.	.	.	.
chr3-161063236-161063839	chr3	161063236	161063839	CTCTAGATACGAGCTAG	-0.0954632	0.863281	MACS_peak_2225	chr3	161063541	161064091	298	54.1818	MACS_peak_2225	chr3	161063504	161064127	189.38	chr3-161063236-161063839	53.7721
chr6-122961092-122961640	chr6	122961092	122961640	GTGTGGATTGGATCAGT	0.269281	0.450853	MACS_peak_3034	chr6	122961369	122961869	271	54.2	MACS_peak_3034	chr6	122961437	122961800	120.31	chr6-122961092-122961640	55.9229
chr5-43849816-43850345	chr5	43849816	43850345	GCGTCTTGGTCGGCCCT	-0.0616549	0.914348	MACS_peak_2545	chr5	43850074	43850574	271	54.2	MACS_peak_2545	chr5	43850164	43850484	75.09	chr5-43849816-43850345	56.5625
chr2-161209169-161209453	chr2	161209169	161209453	TGAGGCTTATGGAATTG	2.60688	2.07232e-18	MACS_peak_1759	chr2	161208940	161209440	271	54.2	MACS_peak_1759	chr2	161208944	161209435	125.64	chr2-161209169-161209453	54.1752
chr14-69267958-69268229	chr14	69267958	69268229	GCCGTGGCTGTCATGTG	-0.564381	0.124035	MACS_peak_933	chr14	69267916	69268416	271	54.2	MACS_peak_933	chr14	69268074	69268257	59.96	chr14-69267958-69268229	84.6995
chr12-74019063-74019862	chr12	74019063	74019862	TGAACGCAATGGTTTGG	-0.301194	0.70235	MACS_peak_708	chr12	74018834	74019334	271	54.2	MACS_peak_708	chr12	74018964	74019204	64.88	chr12-74019063-74019862	58.75
chr16-20876766-20877284	chr16	20876766	20877284	TGCGCAGGCATATGGGC	3.70894	1.57974e-19	MACS_peak_1137	chr16	20876931	20877581	353	54.3077	MACS_peak_1137	chr16	20876888	20877623	472.4	chr16-20876766-20877284	53.8776
chr7-152879524-152880057	chr7	152879524	152880057	CTGTTGGACTATAGTGG	-0.576957	0.00605205	MACS_peak_3249	chr7	152879785	152880285	272	54.4	MACS_peak_3249	chr7	152879912	152880158	73.49	chr7-152879524-152880057	58.9431
chr12-93366837-93367648	chr12	93366837	93367648	TCAGCCCATACGGACAA	2.25479	4.6732e-07	MACS_peak_767	chr12	93367376	93367876	272	54.4	MACS_peak_767	chr12	93367459	93367792	98.34	chr12-93366837-93367648	56.7568
chr12-92296799-92297342	chr12	92296799	92297342	TTTGTCTTATACTGTTC;GTGGAGTATGGCATGCG	2.26598	4.24616e-31	MACS_peak_763	chr12	92296571	92297071	272	54.4	MACS_peak_763	chr12	92296577	92297064	101.92	chr12-92296799-92297342	54.4148
chr1-145104933-145105765	chr1	145104933	145105765	GTGGCCCGCGTTGAGGG	0.226414	0.610206	MACS_peak_127	chr1	145105493	145105993	272	54.4	MACS_peak_127	chr1	145105462	145106023	65.47	chr1-145104933-145105765	54.0107
chr15-73458348-73458936	chr15	73458348	73458936	ATATTTGTAGGGACGCG	0.0179899	0.964456	MACS_peak_1086	chr15	73458052	73458702	354	54.4615	MACS_peak_1086	chr15	73458002	73458751	418.91	chr15-73458348-73458936	53.8051
chr8-144198206-144198834	chr8	144198206	144198834	ATGGAGCGAAAATTCCG	4.15324	3.64029e-26	MACS_peak_3437	chr8	144198561	144199061	273	54.6	MACS_peak_3437	chr8	144198554	144199068	103.52	chr8-144198206-144198834	54.4747
chr7-69248677-69249344	chr7	69248677	69249344	GCCCGAGCACGGTGCTG	0.00195582	0.99661	MACS_peak_3144	chr7	69249071	69249571	273	54.6	MACS_peak_3144	chr7	69249151	69249490	66.12	chr7-69248677-69249344	56.9322
chr2-1730495-1731005	chr2	1730495	1731005	TGTAGCCTACCGGAGTA;GTGTCCGTGGGGGGGCG	0.231374	0.437315	MACS_peak_1558	chr2	1730732	1731232	273	54.6	MACS_peak_1558	chr2	1730848	1731115	61.38	chr2-1730495-1731005	58.8015
chr12-6629434-6630285	chr12	6629434	6630285	GGGGAGGAGGGGGGTCG;GTGAGTCGTGTTGATGG	0.20299	0.932304	MACS_peak_603	chr12	6630012	6630512	273	54.6	MACS_peak_603	chr12	6630110	6630414	73.88	chr12-6629434-6630285	57.5658
chr22-32808369-32808892	chr22	32808369	32808892	CAGTATGAAATCATATC	-0.224953	0.525198	C22orf28	chr22	32808142	32808642	273	54.6	no_overlap	.	.	.	.	.	.
chr1-181490789-181491144	chr1	181490789	181491144	GCGGTATATTAGTTATC	3.19965	1.95862e-20	MACS_peak_188	chr1	181490753	181491403	355	54.6154	MACS_peak_188	chr1	181490716	181491440	346.46	chr1-181490789-181491144	49.0331
chr8-20033185-20034067	chr8	20033185	20034067	TGATTTTTATGAATTGT;GCGGTCTTAAGTGGCTT	-0.213056	0.233115	MACS_peak_3281	chr8	20032959	20033459	274	54.8	MACS_peak_3281	chr8	20033078	20033340	61.76	chr8-20033185-20034067	59.1603
chr6-52289361-52290010	chr6	52289361	52290010	TGAATTGTCAGGGAGTG	0.073835	0.923853	MACS_peak_2910	chr6	52289135	52289635	274	54.8	MACS_peak_2910	chr6	52289277	52289493	67.96	chr6-52289361-52290010	61.1111
chr5-45878455-45879132	chr5	45878455	45879132	AATTATGGTCAACAAGG	-1.12486	0.0273	MACS_peak_2576	chr5	45878229	45878729	274	54.8	MACS_peak_2576	chr5	45878331	45878626	73.41	chr5-45878455-45879132	57.9661
chr4-166747743-166748320	chr4	166747743	166748320	GAGGGTGTTGTGGAGGT	0.0798197	0.903102	MACS_peak_2420	chr4	166747517	166748017	274	54.8	MACS_peak_2420	chr4	166747678	166747855	64.35	chr4-166747743-166748320	63.2768
chr21-41756677-41757455	chr21	41756677	41757455	AAATGGTAAGGAACACG	0.187185	0.787236	MACS_peak_1987	chr21	41756451	41756951	274	54.8	MACS_peak_1987	chr21	41756425	41756977	122.67	chr21-41756677-41757455	54.3478
chr17-72759563-72760171	chr17	72759563	72760171	CCGCAGCTGTGCCCCGG;CGCCGAGGGAAGTGGTC	-0.115477	0.346549	MACS_peak_1377	chr17	72759337	72759837	274	54.8	MACS_peak_1377	chr17	72759479	72759695	65.94	chr17-72759563-72760171	61.1111
chr14-58962541-58962815	chr14	58962541	58962815	CGGCGATCTTGCGTTGG;CCTAGACGACCGTCTGG	0.272583	0.384124	MACS_peak_915	chr14	58962539	58963039	274	54.8	MACS_peak_915	chr14	58962662	58962916	61.88	chr14-58962541-58962815	60.2362
chr12-78550586-78551225	chr12	78550586	78551225	AAGTGACCGAGGGCAGC	2.01585	7.24919e-08	MACS_peak_723	chr12	78550951	78551451	274	54.8	MACS_peak_723	chr12	78551110	78551292	63.45	chr12-78550586-78551225	63.1868
chr1-24019798-24020323	chr1	24019798	24020323	AAGCGTTGACTTAAGAA	-0.113008	0.755883	MACS_peak_26	chr1	24020049	24020549	274	54.8	MACS_peak_26	chr1	24020174	24020423	108.03	chr1-24019798-24020323	59.8394
chr20-53365172-53365885	chr20	53365172	53365885	TCGAGGGACACGCGGCG	-0.359232	0.180628	MACS_peak_1959	chr20	53365088	53366388	713	54.8462	MACS_peak_1959	chr20	53365044	53366431	65.2	chr20-53365172-53365885	51.4059
chr3-64770964-64771510	chr3	64770964	64771510	GGGAGGATGGGCAGCCG	1.48598	9.02934e-12	MACS_peak_2122	chr3	64770603	64771403	439	54.875	MACS_peak_2122	chr3	64770575	64771431	100.22	chr3-64770964-64771510	54.5561
chr6-127959676-127959974	chr6	127959676	127959974	AGAAGAGCAAAGGCGGG;TAGTCTTCGACGCAGTA	0.256217	0.820717	MACS_peak_3045	chr6	127959699	127960199	275	55	MACS_peak_3045	chr6	127959814	127960084	60.69	chr6-127959676-127959974	59.2593
chr5-43080882-43081550	chr5	43080882	43081550	CGGATATTGTTTCCGTC	0.293589	0.540842	MACS_peak_2526	chr5	43080657	43081157	275	55	MACS_peak_2526	chr5	43080724	43081089	69.19	chr5-43080882-43081550	56.7123
chr3-63995942-63996657	chr3	63995942	63996657	TAATGATTTGGATAGGC	1.58488	0.000790127	MACS_peak_2121	chr3	63995558	63996858	715	55	MACS_peak_2121	chr3	63995518	63996897	66.06	chr3-63995942-63996657	51.8492
chr15-53935792-53936330	chr15	53935792	53936330	GTGAGGCAGACAGACGG;CAAATCGATCCAGCACG	-0.286195	0.070337	MACS_peak_1037	chr15	53936055	53936555	275	55	MACS_peak_1037	chr15	53936131	53936479	65.54	chr15-53935792-53936330	57.1839
chr9-68417519-68418042	chr9	68417519	68418042	GGTGCGTTACTGCATAT	0.334431	0.272073	MACS_peak_3463	chr9	68417362	68418312	523	55.0526	MACS_peak_3463	chr9	68417325	68418349	77.53	chr9-68417519-68418042	51.0742
chr20-46621600-46622206	chr20	46621600	46622206	TCGTCCTAGATAGGAGG;CCGCGGGAGTACATGAG	3.1016	2.64846e-25	MACS_peak_1946	chr20	46621298	46622398	606	55.0909	MACS_peak_1946	chr20	46621272	46622423	730.37	chr20-46621600-46622206	52.6499
chr5-43905829-43906582	chr5	43905829	43906582	CGGAGGGGCTCCATGAT	0.425751	0.352048	MACS_peak_2549	chr5	43906306	43906806	276	55.2	MACS_peak_2549	chr5	43906314	43906797	73.58	chr5-43905829-43906582	55.4865
chr16-86159004-86159533	chr16	86159004	86159533	GTGTATGAGGTAAAGGG	3.06966	2.0162e-26	MACS_peak_1239	chr16	86158780	86159280	276	55.2	MACS_peak_1239	chr16	86158883	86159176	70.08	chr16-86159004-86159533	58.7031
chr20-53365351-53366069	chr20	53365351	53366069	AGTCGATAAAGGTAGGC;GCAATGGGCATCTGGTG	0.169244	0.25917	MACS_peak_1959	chr20	53365088	53366388	718	55.2308	MACS_peak_1959	chr20	53365044	53366431	65.2	chr20-53365351-53366069	51.7664
chr20-53365326-53366045	chr20	53365326	53366045	TTGGTACGTTGGTTCGC	0.286641	0.460869	MACS_peak_1959	chr20	53365088	53366388	719	55.3077	MACS_peak_1959	chr20	53365044	53366431	65.2	chr20-53365326-53366045	51.8385
chr9-75045998-75046721	chr9	75045998	75046721	AAGGCCAAAATTCTAGT	3.32213	2.67472e-31	MACS_peak_3465	chr9	75046444	75046944	277	55.4	MACS_peak_3465	chr9	75046557	75046830	163.88	chr9-75045998-75046721	60.0733
chr5-40568919-40569447	chr5	40568919	40569447	TCGTAAGGGGTGTGGAG	0.532241	0.066608	MACS_peak_2486	chr5	40568696	40569196	277	55.4	MACS_peak_2486	chr5	40568700	40569192	154.46	chr5-40568919-40569447	55.4878
chr17-51881069-51881658	chr17	51881069	51881658	TTGGGAATGCGAGCACT	-0.0927102	0.875567	MACS_peak_1301	chr17	51881381	51881881	277	55.4	MACS_peak_1301	chr17	51881505	51881757	62.16	chr17-51881069-51881658	60.7143
chr11-63457026-63457542	chr11	63457026	63457542	AACCCGACTTTATTTCC	-1.28254	0.00944909	MACS_peak_509	chr11	63456803	63457303	277	55.4	MACS_peak_509	chr11	63456980	63457126	77.82	chr11-63457026-63457542	68.4932
chr1-68455283-68456005	chr1	68455283	68456005	CGACTGGGCACGCAGAG	0.36524	0.436702	MACS_peak_75	chr1	68455060	68455560	277	55.4	MACS_peak_75	chr1	68455210	68455409	60.58	chr1-68455283-68456005	63.3166
chr8-11939718-11940277	chr8	11939718	11940277	GAATGCGGGGGGGCAGT	1.06776	0.00743407	neg_region_33	chr8	11940000	11940500	277	55.4	no_overlap	.	.	.	.	.	.
chr12-120883294-120884177	chr12	120883294	120884177	CAAGAGTCTGAGTAGTA	2.15701	1.04709e-11	MACS_peak_801	chr12	120883789	120884489	388	55.4286	MACS_peak_801	chr12	120883756	120884522	537.06	chr12-120883294-120884177	54.9608
chr16-89508549-89509048	chr16	89508549	89509048	GGGCGGTGATTCTCCAT	3.14438	2.32509e-24	MACS_peak_1244	chr16	89508282	89508882	333	55.5	MACS_peak_1244	chr16	89508234	89508929	244.47	chr16-89508549-89509048	54.6763
chr5-43007072-43007803	chr5	43007072	43007803	TCGAGGACGGAGTGCAG;AAGCGGGAGGTGCAGAG	0.566312	0.0892876	MACS_peak_2525	chr5	43007414	43008114	389	55.5714	MACS_peak_2525	chr5	43007377	43008150	512.05	chr5-43007072-43007803	55.11
chr6-102501312-102501907	chr6	102501312	102501907	ATGGACGTTTGCTGACT	0.635388	0.209199	MACS_peak_3008	chr6	102501090	102501590	278	55.6	MACS_peak_3008	chr6	102501169	102501511	70.02	chr6-102501312-102501907	58.1871
chr5-20194506-20195008	chr5	20194506	20195008	CGTGTTCTTCGTGAGCA	-0.00895292	0.983798	MACS_peak_2452	chr5	20194284	20194784	278	55.6	MACS_peak_2452	chr5	20194405	20194662	61.21	chr5-20194506-20195008	60.7004
chr2-173294668-173295284	chr2	173294668	173295284	TGTGACGTTTGGGGACA	0.203812	0.429044	MACS_peak_1786	chr2	173294446	173294946	278	55.6	MACS_peak_1786	chr2	173294591	173294800	69.67	chr2-173294668-173295284	63.1579
chr20-52936874-52937485	chr20	52936874	52937485	GTTGCGGGTCAGGGGCT	-0.0176718	0.969174	MACS_peak_1954	chr20	52937123	52937773	362	55.6923	MACS_peak_1954	chr20	52937097	52937798	63.93	chr20-52936874-52937485	55.3495
chr15-52955954-52956479	chr15	52955954	52956479	GTTGGACATGGGGTTGC	2.66224	2.54904e-15	MACS_peak_1031	chr15	52955666	52956316	362	55.6923	MACS_peak_1031	chr15	52955639	52956342	193.94	chr15-52955954-52956479	55.192
chr8-124856802-124857499	chr8	124856802	124857499	ACTTGGGGTTTTGTGGG;TGGCGTTGAACGAGACG	3.01589	1.05316e-33	MACS_peak_3402	chr8	124856559	124857809	697	55.76	MACS_peak_3402	chr8	124856525	124857842	647.49	chr8-124856802-124857499	52.9233
chr6-44214386-44214926	chr6	44214386	44214926	AACTAAAGAACCCGCTG	0.17908	0.736791	MACS_peak_2892	chr6	44214647	44215147	279	55.8	MACS_peak_2892	chr6	44214818	44214975	62.55	chr6-44214386-44214926	68.7898
chr5-153048127-153048599	chr5	153048127	153048599	ACGAGTCACTTGAGGAG	0.295729	0.405652	MACS_peak_2784	chr5	153048320	153048820	279	55.8	MACS_peak_2784	chr5	153048457	153048682	67.19	chr5-153048127-153048599	63.1111
chr12-119342899-119343382	chr12	119342899	119343382	GTAGATAGGCGTGAGGC	0.292841	0.531457	MACS_peak_798	chr12	119343103	119343603	279	55.8	MACS_peak_798	chr12	119343241	119343465	67.35	chr12-119342899-119343382	62.9464
chr7-143240639-143241179	chr7	143240639	143241179	GTAAGACGAAAGACGGA	1.06862	0.017192	neg_region_49	chr7	143240900	143241400	279	55.8	no_overlap	.	.	.	.	.	.
chr20-46412980-46413725	chr20	46412980	46413725	GTATGTAGTATAAGTGG;GAAGTGGACATGTGGTA	1.18098	0.0222191	MACS_peak_1945	chr20	46413362	46414012	363	55.8462	MACS_peak_1945	chr20	46413331	46414043	147.04	chr20-46412980-46413725	55.3371
chr5-43934107-43934716	chr5	43934107	43934716	CACGGAAGTGTTTATTA;AAGTGAGTTTGGTCATT	-0.202291	0.86759	MACS_peak_2551	chr5	43934436	43934936	280	56	MACS_peak_2551	chr5	43934480	43934892	61.18	chr5-43934107-43934716	57.2816
chr17-61869416-61869916	chr17	61869416	61869916	GATCTGGCGGAGGCTCG	0.324393	0.410541	MACS_peak_1354	chr17	61869636	61870136	280	56	MACS_peak_1354	chr17	61869661	61870111	67.58	chr17-61869416-61869916	56.6667
chr11-79949583-79950123	chr11	79949583	79950123	CTTATCGTATTTGTTAA	-0.251593	0.652421	MACS_peak_547	chr11	79949363	79949863	280	56	MACS_peak_547	chr11	79949491	79949735	60.86	chr11-79949583-79950123	62.2951
chr1-115273107-115273677	chr1	115273107	115273677	CTGTGTTACCGGAGGGT	0.221711	0.456589	MACS_peak_118	chr1	115272887	115273387	280	56	MACS_peak_118	chr1	115272851	115273422	84.19	chr1-115273107-115273677	55.1664
chr20-52823991-52824271	chr20	52823991	52824271	TGCACTAGGGTACTGGG	-0.179375	0.737279	PFDN4	chr20	52823986	52824486	280	56	no_overlap	.	.	.	.	.	.
chrX-141620443-141621047	chrX	141620443	141621047	GGTCTTAATCAGAGTTA;GTCCAGGCGAGTCGGAT	0.409702	0.27067	MACS_peak_3626	chrX	141620224	141620724	281	56.2	MACS_peak_3626	chrX	141620385	141620563	65.59	chrX-141620443-141621047	67.4157
chr5-79763209-79763907	chr5	79763209	79763907	TGAGGGGGCGGTCCGGG;GCTAAGGTGGACTATTA	4.33377	5.64494e-77	MACS_peak_2629	chr5	79762990	79763490	281	56.2	MACS_peak_2629	chr5	79762981	79763499	188.08	chr5-79763209-79763907	55.9846
chr2-2659039-2659511	chr2	2659039	2659511	GCACTTACATCAGCTCA	-0.0175587	0.97967	MACS_peak_1560	chr2	2658820	2659320	281	56.2	MACS_peak_1560	chr2	2658982	2659158	61.85	chr2-2659039-2659511	67.6136
chr8-127526399-127527152	chr8	127526399	127527152	AGGAAAGCGAATGATGG	0.165925	0.808127	MACS_peak_3410	chr8	127526181	127526681	282	56.4	MACS_peak_3410	chr8	127526255	127526606	72.5	chr8-127526399-127527152	58.9744
chr8-89793044-89793575	chr8	89793044	89793575	AGGGAGGCTGGGGGCGT	-0.40475	0.390603	MACS_peak_3323	chr8	89793293	89793793	282	56.4	MACS_peak_3323	chr8	89793423	89793662	64.71	chr8-89793044-89793575	63.5983
chr5-164777551-164778054	chr5	164777551	164778054	TTGGTCCGTTGTAAGCT	-0.754671	0.0637657	MACS_peak_2805	chr5	164777333	164777833	282	56.4	MACS_peak_2805	chr5	164777462	164777703	64.73	chr5-164777551-164778054	63.0705
chr5-42963642-42963924	chr5	42963642	42963924	GGTGTCTGTGGGGGAGC;TTAATCTTTACATACGG	0.269145	0.15634	MACS_peak_2524	chr5	42963499	42963999	282	56.4	MACS_peak_2524	chr5	42963547	42963951	66.21	chr5-42963642-42963924	69.802
chr12-78665420-78666017	chr12	78665420	78666017	GATCGCTTTAACGACCG	0.102386	0.914681	MACS_peak_724	chr12	78665202	78665702	282	56.4	MACS_peak_724	chr12	78665381	78665522	77.82	chr12-78665420-78666017	72.3404
chr12-47950176-47950758	chr12	47950176	47950758	GCCGGATGCTTGCAGAG;AATTGCAATAACACAGT	3.59958	7.3308e-42	MACS_peak_636	chr12	47949958	47950458	282	56.4	MACS_peak_636	chr12	47950034	47950381	110.01	chr12-47950176-47950758	59.0778
chr1-144010322-144010860	chr1	144010322	144010860	ACAGAGGCGCGGCCGTC	3.91164	1.64503e-20	MACS_peak_125	chr1	144010465	144011165	395	56.4286	MACS_peak_125	chr1	144010426	144011203	496.63	chr1-144010322-144010860	55.8559
chr9-123943773-123944189	chr9	123943773	123944189	GTATAGGGGAGTGTGGG;TGGTGTTTAGAGTGCCA	-0.955832	0.04418	MACS_peak_3547	chr9	123943556	123944056	283	56.6	MACS_peak_3547	chr9	123943655	123943956	60.78	chr9-123943773-123944189	60.7973
chr6-38643798-38644321	chr6	38643798	38644321	GGGTCACGCATGAGTAG	-0.579373	0.193893	MACS_peak_2882	chr6	38644038	38644538	283	56.6	MACS_peak_2882	chr6	38644150	38644426	70.01	chr6-38643798-38644321	61.9565
chr6-38643796-38644321	chr6	38643796	38644321	AGGGGGGCTGGGGGGGG	-0.772394	0.225572	MACS_peak_2882	chr6	38644038	38644538	283	56.6	MACS_peak_2882	chr6	38644150	38644426	70.01	chr6-38643796-38644321	61.9565
chr5-74517975-74518908	chr5	74517975	74518908	CGGGTGAGGCGGGAGGG	-0.816387	0.0476904	MACS_peak_2621	chr5	74517758	74518258	283	56.6	MACS_peak_2621	chr5	74517921	74518095	64.9	chr5-74517975-74518908	68.9655
chr1-190549599-190550157	chr1	190549599	190550157	ATGCATGGGCAGACCGA	0.304367	0.239857	MACS_peak_210	chr1	190549382	190549882	283	56.6	MACS_peak_210	chr1	190549514	190549750	67.56	chr1-190549599-190550157	63.9831
chr1-185113925-185114514	chr1	185113925	185114514	AGTGCGGACATTACGTC	-0.0915877	0.9162	MACS_peak_194	chr1	185114231	185114731	283	56.6	MACS_peak_194	chr1	185114382	185114580	63.83	chr1-185113925-185114514	66.6667
chr14-21565358-21566183	chr14	21565358	21566183	CCTACCGGAAAACCTAG	1.5393	0.0022794	MACS_peak_191352	chr14	21565141	21565641	283	56.6	no_overlap	.	.	.	.	.	.
chr15-49917344-49918125	chr15	49917344	49918125	AGCGAATTGGCAGGTTT;ATACCCATATAGCCCCA	3.32078	3.02096e-43	MACS_peak_1019	chr15	49917672	49918472	453	56.625	MACS_peak_1019	chr15	49917641	49918502	303.85	chr15-49917344-49918125	56.2137
chr7-152879386-152880069	chr7	152879386	152880069	GGTTGGTGCCAAATGCG	0.191039	0.701592	MACS_peak_3249	chr7	152879785	152880285	284	56.8	MACS_peak_3249	chr7	152879912	152880158	73.49	chr7-152879386-152880069	63.8211
chr6-48861349-48861870	chr6	48861349	48861870	GCTACTCTAGTAAGGAA	0.717991	0.210429	MACS_peak_2903	chr6	48861586	48862086	284	56.8	MACS_peak_2903	chr6	48861715	48861957	64.58	chr6-48861349-48861870	64.0496
chr17-59361707-59362504	chr17	59361707	59362504	GGAGAGCATAATTGGCG	2.72912	2.15814e-13	MACS_peak_1330	chr17	59361548	59362948	797	56.9286	MACS_peak_1330	chr17	59361518	59362977	204.92	chr17-59361707-59362504	54.6265
chr5-42848971-42849569	chr5	42848971	42849569	CGAGTGGTCCGTGGGTG	-0.106846	0.79134	MACS_peak_2522	chr5	42848756	42849256	285	57	MACS_peak_2522	chr5	42848833	42849178	66.77	chr5-42848971-42849569	60
chr20-29648253-29648861	chr20	29648253	29648861	CGTGGTGCTCGATATGG	-0.561804	0.19933	MACS_peak_1925	chr20	29648038	29648538	285	57	MACS_peak_1925	chr20	29647999	29648576	66.67	chr20-29648253-29648861	55.9792
chr20-52823611-52824271	chr20	52823611	52824271	GGGAGGGGCACCCGGGG	-0.133608	0.803842	PFDN4	chr20	52823986	52824486	285	57	no_overlap	.	.	.	.	.	.
chr20-52937402-52938058	chr20	52937402	52938058	GACTCTTGTAGTGGGTT	0.082758	0.884233	MACS_peak_1954	chr20	52937123	52937773	371	57.0769	MACS_peak_1954	chr20	52937097	52937798	63.93	chr20-52937402-52938058	56.4907
chr6-49402280-49402936	chr6	49402280	49402936	TGGGTATGTAAAATTTG	-0.33946	0.219379	MACS_peak_2905	chr6	49402066	49402566	286	57.2	MACS_peak_2905	chr6	49402240	49402392	69.73	chr6-49402280-49402936	73.6842
chr3-3876853-3877370	chr3	3876853	3877370	GCTACAGCTCGGGAGGG	-1.13119	0.0210806	MACS_peak_2050	chr3	3877084	3877584	286	57.2	MACS_peak_2050	chr3	3877235	3877433	60.74	chr3-3876853-3877370	68.1818
chr20-24068373-24068850	chr20	24068373	24068850	CCTGACACGGGTGTCGG;GGGTGGTTGGCGGGGCG	0.7765	4.16267e-08	MACS_peak_1919	chr20	24068159	24068659	286	57.2	MACS_peak_1919	chr20	24068309	24068509	64.32	chr20-24068373-24068850	68
chr15-26243918-26244467	chr15	26243918	26244467	TCAGCATCCTGAGCCAC	0.209536	0.605984	MACS_peak_1000	chr15	26244181	26244681	286	57.2	MACS_peak_1000	chr15	26244312	26244550	75.91	chr15-26243918-26244467	65.1261
chr1-181491031-181491714	chr1	181491031	181491714	ACGGTTGGCGAGTGAGG	4.638	2.38243e-44	MACS_peak_188	chr1	181490753	181491403	372	57.2308	MACS_peak_188	chr1	181490716	181491440	346.46	chr1-181491031-181491714	56.4917
chr7-579748-580248	chr7	579748	580248	TGGGCGGGAGGGAGGCA;GTACCGGCGAGCTTTTT	-0.0482374	0.873734	MACS_peak_3079	chr7	579535	580035	287	57.4	MACS_peak_3079	chr7	579561	580008	66.95	chr7-579748-580248	58.1655
chr6-100415448-100415976	chr6	100415448	100415976	GTGGAGTGTAGTGCGGG	0.856047	0.163968	MACS_peak_3001	chr6	100415689	100416189	287	57.4	MACS_peak_3001	chr6	100415785	100416093	65.69	chr6-100415448-100415976	62.013
chr6-70584872-70585384	chr6	70584872	70585384	GGCCGGCAGGAAGCGGG;TTCGTGACCGAACACTT	0.395633	0.262123	MACS_peak_2941	chr6	70585097	70585597	287	57.4	MACS_peak_2941	chr6	70585248	70585446	60.74	chr6-70584872-70585384	68.6869
chr22-47524821-47525671	chr22	47524821	47525671	GAGGCTAAAATGTTTGG	-0.617179	0.00979473	MACS_peak_2033	chr22	47525384	47525884	287	57.4	MACS_peak_2033	chr22	47525434	47525833	91.99	chr22-47524821-47525671	59.3985
chr17-58922828-58923784	chr17	58922828	58923784	GCGCGACCCGCAATGGG	0.22052	0.769396	MACS_peak_1329	chr17	58922615	58923115	287	57.4	MACS_peak_1329	chr17	58922583	58923147	177.8	chr17-58922828-58923784	56.5603
chr16-24392652-24393243	chr16	24392652	24393243	CCGGTATGGGGTAAGAG	-0.200949	0.661263	MACS_peak_1141	chr16	24392956	24393456	287	57.4	MACS_peak_1141	chr16	24393083	24393329	64	chr16-24392652-24393243	65.0407
chr1-147567072-147567687	chr1	147567072	147567687	AGGAGAGAGTCAGTTGC	-0.507362	0.258011	neg_region_24	chr1	147567400	147567900	287	57.4	no_overlap	.	.	.	.	.	.
chr20-53365231-53365979	chr20	53365231	53365979	GGGGGATAGGAAAGGAG	-0.0829705	0.863587	MACS_peak_1959	chr20	53365088	53366388	748	57.5385	MACS_peak_1959	chr20	53365044	53366431	65.2	chr20-53365231-53365979	53.9293
chr1-144010762-144011466	chr1	144010762	144011466	CGTGCATTGTGGTATGG	3.71682	1.30254e-16	MACS_peak_125	chr1	144010465	144011165	403	57.5714	MACS_peak_125	chr1	144010426	144011203	496.63	chr1-144010762-144011466	56.7568
chr5-94930928-94931779	chr5	94930928	94931779	TGAGTAATGGGAACCGT	-0.2278	0.600055	MACS_peak_2659	chr5	94931491	94931991	288	57.6	MACS_peak_2659	chr5	94931625	94931857	66.09	chr5-94930928-94931779	66.3793
chr12-60128307-60128784	chr12	60128307	60128784	GATTACGGGACATCTTT;ATCCGTTAACAGAAAGT	0.234962	0.541225	MACS_peak_674	chr12	60128095	60128595	288	57.6	MACS_peak_674	chr12	60128160	60128530	78.98	chr12-60128307-60128784	60.2703
chr1-217759875-217760407	chr1	217759875	217760407	GGGAACGGGACCGGGGC	0.094598	0.797808	MACS_peak_268	chr1	217760119	217760619	288	57.6	MACS_peak_268	chr1	217760288	217760449	76.32	chr1-217759875-217760407	73.913
chr1-144891825-144892596	chr1	144891825	144892596	GCGTCCCGTCGGGTCCC;GGGTACGTGGAGCACCA	0.539004	0.0245348	MACS_peak_126	chr1	144892308	144892808	288	57.6	MACS_peak_126	chr1	144892500	144892615	61.34	chr1-144891825-144892596	83.4783
chr1-40538803-40539645	chr1	40538803	40539645	TGAGTGGGGTTAGGTAG	-0.189653	0.655012	MACS_peak_40	chr1	40538549	40539149	346	57.6667	MACS_peak_40	chr1	40538507	40539190	122.48	chr1-40538803-40539645	56.6618
chr20-52937398-52937921	chr20	52937398	52937921	GAAGGGGATTGTGAGGG;GAGTGTAGGGCCAGGGA	-0.0991908	0.630465	MACS_peak_1954	chr20	52937123	52937773	375	57.6923	MACS_peak_1954	chr20	52937097	52937798	63.93	chr20-52937398-52937921	57.0613
chr3-63995434-63996309	chr3	63995434	63996309	ACCTGATACAGGGTTGT	0.114811	0.824329	MACS_peak_2121	chr3	63995558	63996858	751	57.7692	MACS_peak_2121	chr3	63995518	63996897	66.06	chr3-63995434-63996309	57.3604
chr17-59361836-59362645	chr17	59361836	59362645	TGCGAAAGCACGTAGTA	-0.598775	0.285241	MACS_peak_1330	chr17	59361548	59362948	809	57.7857	MACS_peak_1330	chr17	59361518	59362977	204.92	chr17-59361836-59362645	55.4489
chr7-159103027-159103732	chr7	159103027	159103732	CCCCGCTCGTCAAGGGA	2.16987	5.32708e-07	MACS_peak_3255	chr7	159103443	159103943	289	57.8	MACS_peak_3255	chr7	159103553	159103833	63.13	chr7-159103027-159103732	63.9286
chr5-73943118-73943945	chr5	73943118	73943945	CTAAGGAAGGCCGGCTG	2.68177	1.85715e-18	MACS_peak_2619	chr5	73942907	73943407	289	57.8	MACS_peak_2619	chr5	73942971	73943342	108.59	chr5-73943118-73943945	60.3774
chr7-152879995-152880706	chr7	152879995	152880706	TAGACAGGATGGCCTAA	0.364522	0.0998939	MACS_peak_3249	chr7	152879785	152880285	290	58	MACS_peak_3249	chr7	152879912	152880158	73.49	chr7-152879995-152880706	66.2602
chr6-70584770-70585387	chr6	70584770	70585387	CTGAGGATCTCACGCCG	0.27405	0.460076	MACS_peak_2941	chr6	70585097	70585597	290	58	MACS_peak_2941	chr6	70585248	70585446	60.74	chr6-70584770-70585387	70.202
chr19-47112585-47113099	chr19	47112585	47113099	TTCTCCGCTGAATGGTG	0.0435521	0.969007	MACS_peak_1525	chr19	47112809	47113309	290	58	MACS_peak_1525	chr19	47112806	47113312	68.96	chr19-47112585-47113099	57.9051
chr16-70598398-70599060	chr16	70598398	70599060	AGACACGAGGGAAGAGG;ACGATCTGACCGTTTCA	-0.32237	0.333028	MACS_peak_1177	chr16	70598770	70599270	290	58	MACS_peak_1177	chr16	70598906	70599134	60.93	chr16-70598398-70599060	67.5439
chr1-68152199-68152985	chr1	68152199	68152985	GTCTAGAACTCAGGTGG	3.54399	8.53614e-22	MACS_peak_74	chr1	68151842	68152692	493	58	MACS_peak_74	chr1	68151802	68152732	436.38	chr1-68152199-68152985	57.3118
chr11-17099330-17099860	chr11	17099330	17099860	GGGGAGGTGAGCCGAGT	0.303184	0.579097	RPS13	chr11	17099120	17099620	290	58	no_overlap	.	.	.	.	.	.
chr6-90576235-90577000	chr6	90576235	90577000	CACTGGGGGTCTCACGG	0.103771	0.876181	MACS_peak_2984	chr6	90576026	90576526	291	58.2	MACS_peak_2984	chr6	90576175	90576377	60.1	chr6-90576235-90577000	70.297
chr5-42683514-42684092	chr5	42683514	42684092	TGTTGGTGGTCGCATGG	-0.717317	0.265542	MACS_peak_2517	chr5	42683801	42684301	291	58.2	MACS_peak_2517	chr5	42683873	42684228	69.6	chr5-42683514-42684092	61.6901
chr5-42598005-42598575	chr5	42598005	42598575	GTGAGGGGTGGTGGGCG	0.155993	0.815541	MACS_peak_2512	chr5	42598284	42598784	291	58.2	MACS_peak_2512	chr5	42598328	42598740	159.45	chr5-42598005-42598575	59.9515
chr14-51066487-51067136	chr14	51066487	51067136	GTGGGGTCTGAGCGGGG	2.11412	1.37927e-07	MACS_peak_906	chr14	51066757	51067407	379	58.3077	MACS_peak_906	chr14	51066707	51067456	439.86	chr14-51066487-51067136	57.2764
chr8-29627660-29628156	chr8	29627660	29628156	AGTGTGGTGACAGCCGC;GTGCGGGTACGGAGAAC	3.19894	3.84893e-29	MACS_peak_3290	chr8	29627806	29628406	350	58.3333	MACS_peak_3290	chr8	29627773	29628438	1482.78	chr8-29627660-29628156	57.594
chr3-63995503-63996317	chr3	63995503	63996317	GCTGAAGTGGGGGTATG	0.474671	0.380349	MACS_peak_2121	chr3	63995558	63996858	759	58.3846	MACS_peak_2121	chr3	63995518	63996897	66.06	chr3-63995503-63996317	57.9405
chr7-80540689-80541226	chr7	80540689	80541226	GTGTACCTGCCGGGCCA	1.49322	2.7936e-06	MACS_peak_3161	chr7	80540481	80540981	292	58.4	MACS_peak_3161	chr7	80540506	80540955	116.13	chr7-80540689-80541226	59.2428
chr5-62960595-62961320	chr5	62960595	62961320	ACGGCGGGTCGTTTGGG	-0.368614	0.118085	MACS_peak_2603	chr5	62961028	62961528	292	58.4	MACS_peak_2603	chr5	62961187	62961368	63.63	chr5-62960595-62961320	73.4807
chr20-24067850-24068451	chr20	24067850	24068451	TGAGGGAGGTGCTCCTG	0.0628983	0.939087	MACS_peak_1919	chr20	24068159	24068659	292	58.4	MACS_peak_1919	chr20	24068309	24068509	64.32	chr20-24067850-24068451	71
chr16-71347803-71348474	chr16	71347803	71348474	CAGGACTTAGGGCGGCG	0.206321	0.570777	MACS_peak_1180	chr16	71348182	71348682	292	58.4	MACS_peak_1180	chr16	71348299	71348565	65.12	chr16-71347803-71348474	65.7895
chrX-134276687-134276979	chrX	134276687	134276979	CGGACATTCGGTGCAAG	-0.046162	0.938633	neg_region_11	chrX	134276500	134277000	292	58.4	no_overlap	.	.	.	.	.	.
chr20-52937393-52937904	chr20	52937393	52937904	CGAGTGGAATCAGTGGT	0.350263	0.159181	MACS_peak_1954	chr20	52937123	52937773	380	58.4615	MACS_peak_1954	chr20	52937097	52937798	63.93	chr20-52937393-52937904	57.7746
chr5-42598068-42598577	chr5	42598068	42598577	AGTGGGAAGGGGGGTCG	0.206312	0.727957	MACS_peak_2512	chr5	42598284	42598784	293	58.6	MACS_peak_2512	chr5	42598328	42598740	159.45	chr5-42598068-42598577	60.4369
chr3-49396992-49397492	chr3	49396992	49397492	ACAAATTTGATCTGATT	0.0696697	0.936793	MACS_peak_2115	chr3	49397199	49397699	293	58.6	MACS_peak_2115	chr3	49397311	49397586	70.15	chr3-49396992-49397492	65.8182
chr17-61869406-61869929	chr17	61869406	61869929	AGGAGGGCACGTACGGG	0.325605	0.618926	MACS_peak_1354	chr17	61869636	61870136	293	58.6	MACS_peak_1354	chr17	61869661	61870111	67.58	chr17-61869406-61869929	59.5556
chr16-76562846-76563348	chr16	76562846	76563348	GTGAACATACGCACGCG	0.616499	0.0562315	MACS_peak_1208	chr16	76562639	76563139	293	58.6	MACS_peak_1208	chr16	76562749	76563029	66.44	chr16-76562846-76563348	65.3571
chr15-54601620-54602279	chr15	54601620	54602279	GATGGCTCTGCTAACAG	-0.546587	0.504321	MACS_peak_1045	chr15	54601986	54602486	293	58.6	MACS_peak_1045	chr15	54602130	54602342	67.08	chr15-54601620-54602279	70.283
chr11-27912536-27913137	chr11	27912536	27913137	CATGCTTGTGGAAGGGC	0.313034	0.635029	MACS_peak_474	chr11	27912329	27912829	293	58.6	MACS_peak_474	chr11	27912517	27912640	129.08	chr11-27912536-27913137	84.5528
chr16-32718257-32718808	chr16	32718257	32718808	GTTCTAGGGAGGGGCTC	-0.361094	0.573101	neg_region_20	chr16	32718050	32718550	293	58.6	no_overlap	.	.	.	.	.	.
chr7-137849580-137850044	chr7	137849580	137850044	CGAAGGTAATAGCTCTC	3.39372	7.13633e-14	MACS_peak_3216	chr7	137849291	137849991	411	58.7143	MACS_peak_3216	chr7	137849254	137850027	330.87	chr7-137849580-137850044	57.8266
chr6-109218081-109218824	chr6	109218081	109218824	TCTTTTCGTTGGTTAGG	1.67155	0.00426041	MACS_peak_3015	chr6	109218530	109219030	294	58.8	MACS_peak_3015	chr6	109218638	109218922	74.26	chr6-109218081-109218824	65.493
chr2-179886912-179887544	chr2	179886912	179887544	TTAACGGACGTGAGGGA	-0.173146	0.621571	MACS_peak_1799	chr2	179886706	179887206	294	58.8	MACS_peak_1799	chr2	179886774	179887138	66.62	chr2-179886912-179887544	62.0879
chr18-60239427-60239965	chr18	60239427	60239965	GGGGGGAAGATGGCGTG;TGTCGATATTACAGGCA	3.17561	5.23705e-43	MACS_peak_1436	chr18	60239671	60240171	294	58.8	MACS_peak_1436	chr18	60239774	60240068	110.56	chr18-60239427-60239965	64.966
chr13-20936508-20937028	chr13	20936508	20937028	CTGGTGGTACCGAGCGT	3.95764	2.13595e-27	MACS_peak_823	chr13	20936734	20937234	294	58.8	MACS_peak_823	chr13	20936766	20937201	99.14	chr13-20936508-20937028	60.2299
chr9-41828756-41829282	chr9	41828756	41829282	TTAAAGAATGCATGGGG	-0.0683896	0.906611	neg_region_17	chr9	41828550	41829050	294	58.8	no_overlap	.	.	.	.	.	.
chr8-31333653-31334291	chr8	31333653	31334291	ATGCAGTGGGGAGAAGT	-0.0592734	0.918366	MACS_peak_3292	chr8	31333996	31334496	295	59	MACS_peak_3292	chr8	31334184	31334307	90.05	chr8-31333653-31334291	86.9919
chr7-95959091-95959712	chr7	95959091	95959712	TGAAACGGAACAGGAAT	4.12319	9.2756e-27	MACS_peak_3172	chr7	95959417	95959917	295	59	MACS_peak_3172	chr7	95959479	95959854	96.93	chr7-95959091-95959712	62.1333
chr5-43007165-43007827	chr5	43007165	43007827	TTTGATGAGGGGACCTC	2.80765	4.04653e-15	MACS_peak_2525	chr5	43007414	43008114	413	59	MACS_peak_2525	chr5	43007377	43008150	512.05	chr5-43007165-43007827	58.2147
chr4-153180260-153180753	chr4	153180260	153180753	TCGTGGGACGCCTGCAG	0.276525	0.439439	MACS_peak_2409	chr4	153180055	153180555	295	59	MACS_peak_2409	chr4	153180074	153180536	93.5	chr4-153180260-153180753	59.7403
chr3-64770931-64771416	chr3	64770931	64771416	AGCTCATTTGAGAATTC	-0.00807545	0.989136	MACS_peak_2122	chr3	64770603	64771403	472	59	MACS_peak_2122	chr3	64770575	64771431	100.22	chr3-64770931-64771416	56.6589
chr20-53365174-53365941	chr20	53365174	53365941	CGCAATCATATGTTCTA	0.433638	0.195044	MACS_peak_1959	chr20	53365088	53366388	767	59	MACS_peak_1959	chr20	53365044	53366431	65.2	chr20-53365174-53365941	55.2992
chr1-66488913-66489561	chr1	66488913	66489561	CCTTTGATGCAAGTGGA	-0.0751261	0.877142	MACS_peak_72	chr1	66488708	66489208	295	59	MACS_peak_72	chr1	66488861	66489054	72.75	chr1-66488913-66489561	73.057
chr8-18898668-18899288	chr8	18898668	18899288	TGTTTCAACAAGCTCGT	4.31337	7.91226e-28	MACS_peak_3280	chr8	18898963	18899513	325	59.0909	MACS_peak_3280	chr8	18898913	18899563	651.88	chr8-18898668-18899288	57.6923
chr5-131101118-131101812	chr5	131101118	131101812	GTATTGGGGGCGGCAGC	2.26161	1.7699e-09	MACS_peak_2747	chr5	131100914	131101414	296	59.2	MACS_peak_2747	chr5	131100980	131101348	97.89	chr5-131101118-131101812	62.5
chr12-105235276-105235776	chr12	105235276	105235776	TTATGGTTACCGCTTAC	-0.236609	0.601069	MACS_peak_785	chr12	105235480	105235980	296	59.2	MACS_peak_785	chr12	105235605	105235855	73.94	chr12-105235276-105235776	68.4
chr14-51066593-51067142	chr14	51066593	51067142	TCTTCCACTTCGGAGGG	3.2556	1.48408e-18	MACS_peak_906	chr14	51066757	51067407	385	59.2308	MACS_peak_906	chr14	51066707	51067456	439.86	chr14-51066593-51067142	58.0774
chr20-53365497-53366268	chr20	53365497	53366268	GTTGGGTGATGGTTTAG	-0.254973	0.518146	MACS_peak_1959	chr20	53365088	53366388	771	59.3077	MACS_peak_1959	chr20	53365044	53366431	65.2	chr20-53365497-53366268	55.5876
chr20-30266583-30267100	chr20	30266583	30267100	CCTTAGGATCACGGGAC	-0.0893291	0.886548	MACS_peak_1926	chr20	30266339	30266939	356	59.3333	MACS_peak_1926	chr20	30266302	30266976	212.46	chr20-30266583-30267100	58.3086
chr17-59362117-59362998	chr17	59362117	59362998	GGGGAAGGGAACTCCTG;AAGGGGGTCGGCAGTGG	4.01284	2.73517e-53	MACS_peak_1330	chr17	59361548	59362948	831	59.3571	MACS_peak_1330	chr17	59361518	59362977	204.92	chr17-59362117-59362998	58.9445
chrX-10729677-10730278	chrX	10729677	10730278	TGCGGAGGAGGCGTGCA	4.04648	1.78778e-19	MACS_peak_3579	chrX	10729474	10729974	297	59.4	MACS_peak_3579	chrX	10729495	10729952	93.3	chrX-10729677-10730278	60.1751
chr6-135601373-135602124	chr6	135601373	135602124	TGTTCCGAGGCAGTAGG	0.483859	0.152207	MACS_peak_3053	chr6	135601827	135602327	297	59.4	MACS_peak_3053	chr6	135601958	135602196	62.77	chr6-135601373-135602124	69.7479
chr5-40600977-40601489	chr5	40600977	40601489	GGTGTCAGCGGAGGGGC	-0.11238	0.901284	MACS_peak_2490	chr5	40601192	40601692	297	59.4	MACS_peak_2490	chr5	40601222	40601661	172.23	chr5-40600977-40601489	60.82
chr2-207370391-207371028	chr2	207370391	207371028	GGTGGGCAGGGGGGTGC	0.153812	0.693297	MACS_peak_1848	chr2	207370188	207370688	297	59.4	MACS_peak_1848	chr2	207370335	207370540	79.12	chr2-207370391-207371028	72.6829
chr14-57133118-57133968	chr14	57133118	57133968	GCGGGGTAGGGCGTGCT	2.55367	2.26268e-08	MACS_peak_908	chr14	57132915	57133415	297	59.4	MACS_peak_908	chr14	57132934	57133396	150.2	chr14-57133118-57133968	60.1732
chr11-27912532-27913201	chr11	27912532	27913201	TAGGGGGCGGTGGTGGG	-0.220953	0.644988	MACS_peak_474	chr11	27912329	27912829	297	59.4	MACS_peak_474	chr11	27912517	27912640	129.08	chr11-27912532-27913201	87.8049
chr10-102051702-102052368	chr10	102051702	102052368	AATGGAGAGGGCTTTGA	-2.17351	4.76601e-08	MACS_peak_404	chr10	102052071	102052571	297	59.4	MACS_peak_404	chr10	102052212	102052430	89.41	chr10-102051702-102052368	71.5596
chr3-64821329-64822399	chr3	64821329	64822399	AAGTTGCTAAATGGACC	3.71837	2.90841e-25	MACS_peak_2123	chr3	64821118	64822918	1070	59.4444	MACS_peak_2123	chr3	64821081	64822955	121.49	chr3-64821329-64822399	57.0971
chr15-49917356-49918148	chr15	49917356	49918148	GTAACCGCGTGTGGTGA	-0.169464	0.825409	MACS_peak_1019	chr15	49917672	49918472	476	59.5	MACS_peak_1019	chr15	49917641	49918502	303.85	chr15-49917356-49918148	58.885
chr12-2113737-2114432	chr12	2113737	2114432	GGTAGTACCCGGGTCTC	1.12069	0.00947711	MACS_peak_596	chr12	2113494	2114094	357	59.5	MACS_peak_596	chr12	2113455	2114132	356.35	chr12-2113737-2114432	58.3456
chr10-129737944-129738420	chr10	129737944	129738420	TTAATTGATCTCAGGGT	4.13197	3.0063e-24	MACS_peak_423	chr10	129737720	129738520	476	59.5	MACS_peak_423	chr10	129737684	129738555	463.92	chr10-129737944-129738420	54.6498
chr20-52936651-52937510	chr20	52936651	52937510	GACTATGTTTTTTTCGG	-1.15409	0.00365274	MACS_peak_1954	chr20	52937123	52937773	387	59.5385	MACS_peak_1954	chr20	52937097	52937798	63.93	chr20-52936651-52937510	58.9158
chr9-111251980-111252608	chr9	111251980	111252608	ATACACAACGGATTGGG	4.39846	3.09739e-43	MACS_peak_3523	chr9	111251778	111252278	298	59.6	MACS_peak_3523	chr9	111251776	111252279	82.65	chr9-111251980-111252608	59.4433
chr9-94204268-94205018	chr9	94204268	94205018	CTGATTATACTACGCAG	-0.700291	0.0470028	MACS_peak_3487	chr9	94204066	94204566	298	59.6	MACS_peak_3487	chr9	94204188	94204443	75.59	chr9-94204268-94205018	68.6275
chr5-50504466-50504982	chr5	50504466	50504982	TAGGGGTGTCGTACCGA	8.27118e-05	0.999791	MACS_peak_2584	chr5	50504684	50505184	298	59.6	MACS_peak_2584	chr5	50504843	50505024	75.09	chr5-50504466-50504982	76.7956
[truncated: 16,510 more rows]
