# Supplementary material for: Multiplex enhancer-reporter assays uncover unsophisticated TP53 enhancer logic
Source: HighWire-hosted journal article supplement (doi:10.1101/gr.204149.116), 2016-05-18
Supplement: Supplemental_Tables_S1-S5andS8.zip [file Supplemental_Table_S2.xlsx]

## Sheet: CHEQ-seq_subsets
	design information				peak information				region information
corresponding peak name	chr	start	stop	% overlap	Chr	start	stop	% overlap	region	Barcodes	subset	expression	padj
MACS_peak_2525	chr5	43007414	43008114	94.7143	chr5	43007377	43008150	85.7697	chr5-43007430-43008093	ATGCAAGTAGCGTTTTG	ambiguous	-1.72875	0.000792331
MACS_peak_282	chr1	227417139	227417639	60.6	chr1	227417276	227417502	73.4513	chr1-227416971-227417442	CAGATTTGCTTGCTGGT	down	-1.60853	0.000333349
MACS_peak_453	chr11	10820937	10821437	100	chr11	10821072	10821301	100	chr11-10820649-10821468	TCTGCACGTGGTGTGCG	down	-1.85771	0.000116678
MACS_peak_662	chr12	57031837	57032337	97.6	chr12	57031953	57032221	100	chr12-57031705-57032325	GCGCTCGGGGGAAGAGT	down	-1.74215	0.00030345
MACS_peak_665	chr12	57036996	57037496	87	chr12	57037073	57037419	100	chr12-57037061-57037638	GGGCGCGAGGGGGTGGA	down	-2.27471	3.51873e-20
MACS_peak_980	chr14	98435877	98436377	65.6	chr14	98436001	98436253	80.9524	chr14-98436049-98436560	CTTTTTGGGATATACTG	down	-1.62151	0.000499949
MACS_peak_1741	chr2	149628997	149629497	100	chr2	149629153	149629340	100	chr2-149628985-149629511	AAGGGGGCGTGGCCTAG	down	-1.5501	0.000117581
MACS_peak_1565	chr2	5529588	5530088	84.6	chr2	5529717	5529958	100	chr2-5529665-5530195	GTGATGGGCCGTGTAGG	down	-1.56305	0.000124886
MACS_peak_1828	chr2	195533773	195534273	72.2	chr2	195533871	195534175	86.5132	chr2-195533671-195534134	GTGGCGCGGAGTGGTAG	down	-3.56355	1.18484e-15
MACS_peak_2806	chr5	164779264	164779764	98.8	chr5	164779408	164779619	100	chr5-164779218-164779758	TGGCGGGATACTGAGGT	down	-2.30442	5.3898e-08
MACS_peak_3247	chr7	152793944	152794444	78.8	chr7	152794066	152794321	100	chr7-152793766-152794338	ATTGGGTTATTTCAGGA;GATTAAAGCGCGTGTTT	down	-1.53824	0.000101702
MACS_peak_2779	chr5	151386949	151387449	100	chr5	151387064	151387333	100	chr5-151386888-151387715	CCATAGCTGCCAAAGGT;GTGGGTGCAGGGCGGTG	greyzone	0.14087	0.0219971
MACS_peak_150	chr1	156714618	156715118	100	chr1	156714750	156714985	100	chr1-156714449-156715289	TCCTGCACCTCAATGCA;ACAATCCCTGACCACGT	greyzone	0.211952	0.0312886
MACS_peak_264	chr1	216500673	216501173	96.8	chr1	216500732	216501114	100	chr1-216500689-216501440	AATCGGCAAGAAGCTCA;GGGTACGGGCTTGGGGG	greyzone	0.338102	0.0132455
MACS_peak_1037	chr15	53936055	53936555	61.2	chr15	53936131	53936479	66.092	chr15-53936249-53936937	ATGTGCGTCTCCTTCGG	greyzone	0.416683	0.0457837
MACS_peak_1853	chr2	210794069	210794569	78.4	chr2	210794166	210794471	96.7213	chr2-210793710-210794461	TGTGTGGCAGGGGAGCA	greyzone	0.418308	0.0979198
MACS_peak_118	chr1	115272887	115273387	100	chr1	115272851	115273422	94.0455	chr1-115272885-115273451	CCCGGTGTGTCGACACA	greyzone	0.425895	0.0953852
MACS_peak_3383	chr8	115394002	115394502	80.4	chr8	115394185	115394318	100	chr8-115394100-115394691	GATTAGGTGCGAAAGCC	greyzone	0.43297	0.0848948
MACS_peak_3537	chr9	118706422	118706922	100	chr9	118706392	118706951	100	chr9-118706368-118707025	TATGCCCGGACCAAAAC	greyzone	0.44287	0.082437
MACS_peak_3326	chr8	90859122	90859622	85.8	chr8	90859209	90859534	100	chr8-90859193-90859818	GGCAGTCTGTGGTCGAA	greyzone	0.450561	0.0998242
MACS_peak_2270	chr4	6643867	6644367	100	chr4	6643845	6644388	100	chr4-6643803-6644558	TGGACGGACTTGTGGTG	greyzone	0.501119	0.0531098
MACS_peak_1554	chr2	1177640	1178140	78.6	chr2	1177779	1178001	100	chr2-1177169-1178033	GCGGGGTGGCGACCAAG	greyzone	0.518433	0.0553571
MACS_peak_914	chr14	58796215	58796715	77.2	chr14	58796341	58796589	100	chr14-58795913-58796601	TAAGCTGTTTAGCACGC	greyzone	0.523457	0.13522
MACS_peak_3365	chr8	111417391	111417891	87.6	chr8	111417501	111417781	100	chr8-111417453-111418154	CGGAGCTGGGGGTAGAG	greyzone	0.524494	0.0426163
MACS_peak_40	chr1	40538549	40539149	79	chr1	40538507	40539190	69.3997	chr1-40538587-40539061	CTACTGTCGAGCAGTTG	greyzone	0.524698	0.163758
MACS_peak_1180	chr16	71348182	71348682	79.2	chr16	71348299	71348565	100	chr16-71348286-71348995	CAAGACCACAGCGGGAA	greyzone	0.53069	0.120903
MACS_peak_1077	chr15	67587285	67587785	100	chr15	67587425	67587645	100	chr15-67587152-67587903	TGATGACTACGCTTTAG;CCGTGGGTACCTCACGA	greyzone	0.530811	0.101423
MACS_peak_194	chr1	185114231	185114731	89.2	chr1	185114382	185114580	100	chr1-185114052-185114677	AAACCGTGATGATGGGG	greyzone	0.531926	0.0452874
MACS_peak_2983	chr6	89530542	89531042	82.8	chr6	89530653	89530930	100	chr6-89530447-89530956	CGTGAGAGGGCTTTAGG;TAGATTGTGGCGGAACC	greyzone	0.541731	0.159024
MACS_peak_2508	chr5	42327997	42328497	67.4	chr5	42328166	42328328	100	chr5-42328160-42328609	CGGGAATACCGGGAGGG;CAACCAACAATCTAGCA	greyzone	0.542545	0.060263
MACS_peak_2195	chr3	128888857	128889357	100	chr3	128888972	128889242	100	chr3-128888771-128889376	CGGTGGGGCTGACTGAC	greyzone	0.547604	0.137827
MACS_peak_539	chr11	77019257	77019757	65.4	chr11	77019367	77019647	77.5	chr11-77019430-77019958	GGTTGGGAGGAAGCGGC	greyzone	0.549127	0.0397512
MACS_peak_2916	chr6	54054195	54054695	72.4	chr6	54054349	54054541	100	chr6-54054333-54054857	GGCCACGGGAGGTAACT	greyzone	0.559248	0.178617
MACS_peak_894	chr14	42020010	42020510	82.4	chr14	42020143	42020377	100	chr14-42020098-42020692	CTGTGCCTGTTGGCCCG;GGCTGAGCGTGCCTGGA	greyzone	0.560184	0.0105623
MACS_peak_1770	chr2	167503859	167504359	72.8	chr2	167503964	167504254	89.3103	chr2-167503657-167504223	GCGGCTAGGTACCGCGA	greyzone	0.569491	0.18739
MACS_peak_3181	chr7	100693546	100694046	100	chr7	100693705	100693886	100	chr7-100693474-100694236	TCTAGGTATCGAGTGGA	greyzone	0.576708	0.0479568
MACS_peak_2384	chr4	121372469	121372969	100	chr4	121372631	121372807	100	chr4-121372222-121372978	CTAGCTGGTCGGGGGAC	greyzone	0.579953	0.0580787
MACS_peak_2883	chr6	39406715	39407215	100	chr6	39406854	39407075	100	chr6-39406499-39407294	GTAGATAATCCATTCCC;GGTCGGTCCGTCGGGGT	greyzone	0.580917	0.0168345
MACS_peak_3375	chr8	113066922	113067422	78.6	chr8	113067088	113067255	100	chr8-113067029-113067572	GGATGTAGCGGGGCCGG	greyzone	0.591419	0.0396518
MACS_peak_706	chr12	73280484	73280984	100	chr12	73280611	73280856	100	chr12-73280298-73280993	TTTTGGGCGTTGCTTGA;CGCTGGTTACAGGCTTA	greyzone	0.594647	0.0830805
MACS_peak_1788	chr2	173589725	173590225	70	chr2	173589876	173590074	100	chr2-173589875-173590381	AATGTACTGCTTTAGCA;ATTCTTCGTGAGATGCG	greyzone	0.595021	0.00480361
MACS_peak_1786	chr2	173294446	173294946	94.4	chr2	173294591	173294800	100	chr2-173294474-173295155	TTATAGTGGTGACCCGG	greyzone	0.606191	0.0447612
MACS_peak_307	chr10	7716622	7717122	61	chr10	7716803	7716940	90.5109	chr10-7716365-7716927	GCTATCCTGTTCCTGCG	greyzone	0.624481	0.0641918
MACS_peak_1160	chr16	52248318	52248818	94.6	chr16	52248498	52248638	100	chr16-52248341-52248814	GTCCCCTTGCTGGACGC	greyzone	0.626393	0.0470028
MACS_peak_1934	chr20	35877029	35877529	97.2	chr20	35877153	35877404	100	chr20-35877013-35877515	AGGCCGCGGGTAGAGCG	greyzone	0.627349	0.0657045
MACS_peak_2551	chr5	43934436	43934936	98	chr5	43934480	43934892	100	chr5-43934446-43935008	CTGTTCACGAAGGTATA	greyzone	0.637155	0.126318
MACS_peak_1188	chr16	73446821	73447321	82.2	chr16	73446947	73447194	100	chr16-73446683-73447232	AGTTCAGGGAGGAGCGT	greyzone	0.637242	0.0369445
MACS_peak_2522	chr5	42848756	42849256	100	chr5	42848833	42849178	100	chr5-42848756-42849263	GAGATTAGTCACCGCGG	greyzone	0.637616	0.0110224
MACS_peak_913	chr14	58718686	58719186	86	chr14	58718863	58719009	100	chr14-58718756-58719251	TAGTTGGTGGACAGGGG	greyzone	0.63962	0.130417
MACS_peak_342	chr10	33732628	33733128	92.4	chr10	33732785	33732971	100	chr10-33732666-33733310	TACGGGTAGATGGCCGG;CGGACGAGCCAAACGTA	greyzone	0.639969	0.0046126
MACS_peak_151	chr1	157938522	157939022	79	chr1	157938712	157938831	100	chr1-157938413-157938917	TTCAGTATACGAGAAGT	greyzone	0.688285	0.171554
MACS_peak_265	chr1	216540368	216540868	60	chr1	216540439	216540797	63.9665	chr1-216540568-216541139	GGTGGTGGGTCTGGAGC	greyzone	0.695869	0.0676019
MACS_peak_3327	chr8	91141647	91142147	70.6	chr8	91141774	91142020	91.8699	chr8-91141505-91142000	GGAAGCAACGGGTCTGT	greyzone	0.698438	0.126048
MACS_peak_495	chr11	47758162	47758662	100	chr11	47758242	47758582	100	chr11-47758117-47758731	GAGCTTTGGGACTGCGC	greyzone	0.707168	0.0576065
MACS_peak_2679	chr5	102629849	102630349	87.4	chr5	102629907	102630291	98.6979	chr5-102629779-102630286	GGGGTCGGCGCGGGGTG	greyzone	0.732652	0.0393058
MACS_peak_2688	chr5	106553134	106553634	65.8	chr5	106553271	106553496	84.8889	chr5-106553305-106553885	GCTCACAAGTGGTCCCG	greyzone	0.733446	0.177531
MACS_peak_707	chr12	73956750	73957250	79.6	chr12	73956850	73957150	99.3333	chr12-73956497-73957148	TCTCTTCGTCGACGCGT	greyzone	0.735278	0.0622411
MACS_peak_1561	chr2	2963650	2964150	85.6	chr2	2963825	2963974	100	chr2-2963568-2964078	CTCCCGTCTGCGGACTG	greyzone	0.740525	0.00182278
MACS_peak_455	chr11	10821833	10822333	100	chr11	10821603	10821841	100	chr11-10821551-10822501	TCAGAGGCGAGAGGAGG	greyzone	0.753676	0.00294192
MACS_peak_1319	chr17	57688545	57689045	96	chr17	57688608	57688982	100	chr17-57688565-57689126	TCGAGGAGAACCCGCCA	greyzone	0.754422	0.135725
MACS_peak_2541	chr5	43802813	43803313	81.2	chr5	43802930	43803196	100	chr5-43802477-43803219	GTAAGTGAGTCCGTGGC	greyzone	0.767329	0.038082
MACS_peak_2783	chr5	152897387	152897887	73.8	chr5	152897567	152897707	100	chr5-152897183-152897756	GGAGTCGTGAGTAGTGG;AGCGATAGAGTGGCCGG	greyzone	0.773687	8.04445e-08
MACS_peak_251	chr1	205683432	205683932	99	chr1	205683444	205683920	100	chr1-205683435-205683930	AGGTAGACGGGGAGGGC	greyzone	0.780781	0.00625433
MACS_peak_389	chr10	90694837	90695337	93.8	chr10	90695019	90695155	100	chr10-90694703-90695306	CGTGGTCACAGGGAGGG	greyzone	0.806785	9.14511e-06
MACS_peak_1108	chr15	97401154	97401654	100	chr15	97401316	97401492	100	chr15-97401106-97401669	ATATGCCTCGATGCGTG;TCTGGCCTAGCTGGGAA	greyzone	0.823875	0.0188873
MACS_peak_2954	chr6	75965559	75966059	92	chr6	75965673	75965944	100	chr6-75965493-75966019	TAATGCTGCCGAACGGG	greyzone	0.880266	0.00985321
MACS_peak_1988	chr21	43783220	43783720	91.6	chr21	43783259	43783680	99.5249	chr21-43783026-43783678	GCCAGGTGATACTGCTG	greyzone	0.894747	0.00146186
MACS_peak_3615	chrX	130034543	130035043	77	chrX	130034606	130034979	86.059	chrX-130034658-130035233	AGGGGAGCAGCGAATCG	greyzone	0.895225	0.0467202
MACS_peak_1307	chr17	54498267	54498767	64.4	chr17	54498400	54498633	80.6867	chr17-54498445-54499312	CTTGGAAGGAGGAGGCG;TCGATGCTAGTTGGGCA	greyzone	0.905842	9.58655e-08
MACS_peak_460	chr11	16197778	16198278	100	chr11	16197902	16198154	100	chr11-16197734-16198307	GATCGGAGCTGGGAGAG	greyzone	0.907302	0.000524867
MACS_peak_3626	chrX	141620224	141620724	62.8	chrX	141620385	141620563	85.9551	chrX-141620410-141620944	TGGAGCGGACGAGGGAG	greyzone	0.91137	2.98017e-05
MACS_peak_1028	chr15	52850252	52850852	100	chr15	52850209	52850895	100	chr15-52850073-52850926	GGTCCCGGTGTCGCAGG	greyzone	0.947907	0.055
MACS_peak_2164	chr3	96032626	96033126	98.4	chr3	96032767	96032985	100	chr3-96032634-96033280	TAACGAGCGGTAATATG	greyzone	1.00075	0.000111329
MACS_peak_2121	chr3	63995558	63996858	60.6154	chr3	63995518	63996897	60.0435	chr3-63995449-63996346	CGGGAAGTGAGGTGCGG	greyzone	1.02623	0.000192792
MACS_peak_12	chr1	8927014	8927514	100	chr1	8927184	8927343	100	chr1-8926766-8927628	TGGTCAGGGTCGGGCGA	greyzone	1.03616	0.00031287
MACS_peak_3507	chr9	104264101	104264601	100	chr9	104264224	104264477	100	chr9-104264077-104265070	CTCATCGTCGTAGTAAC	greyzone	1.05965	0.00617881
MACS_peak_1723	.	-1	-1	0	chr2	133029600	133029924	100	chr2-133029556-133030113	GTACGTGCTGGTAATAG	greyzone	1.08105	6.59215e-07
MACS_peak_1034	chr15	53379608	53380108	100	chr15	53379693	53380022	100	chr15-53379606-53380146	AGGGTGGTAGAGGGTGC	greyzone	1.08755	0.0396112
MACS_peak_2549	chr5	43906306	43906806	87.4	chr5	43906314	43906797	88.6128	chr5-43906369-43906976	CGAGGCTCGGCTGGGAG	greyzone	1.09107	0.00137944
MACS_peak_1039	chr15	54218372	54218872	88.8	chr15	54218450	54218793	100	chr15-54218428-54219285	ATACCCAAGACCTAGGA	greyzone	1.09304	0.000107078
MACS_peak_3053	chr6	135601827	135602327	100	chr6	135601958	135602196	100	chr6-135601804-135602373	TCTACGGGGTTATGGCG	greyzone	1.12275	0.0017214
MACS_peak_356	chr10	55379411	55379911	67.4	chr10	55379463	55379859	71.9697	chr10-55378903-55379748	TTCTGAGTAAGGATAGG	greyzone	1.17313	0.0606825
MACS_peak_1007	chr15	35800415	35800915	76	chr15	35800512	35800817	92.459	chr15-35800535-35801107	TATTCTAGTCGGGTGCG	greyzone	1.19485	1.01777e-08
MACS_peak_1201	chr16	74773359	74773859	78.2	chr16	74773394	74773824	82.7907	chr16-74773468-74774024	ACAACGTAATTGAACGC	greyzone	1.20984	1.87358e-05
MACS_peak_1893	chr2	238848272	238848772	93.8	chr2	238848277	238848766	94.683	chr2-238848303-238849171	TGAATAAGGTGGGTCGC	greyzone	1.23437	0.00366694
MACS_peak_2891	chr6	43543703	43544203	100	chr6	43543789	43544117	100	chr6-43543658-43544415	GAGTTAAGGCCCCTGTA	greyzone	1.24528	0.0428475
MACS_peak_1268	chr17	26609639	26610139	93.4	chr17	26609788	26609990	100	chr17-26609672-26610266	TGGGGCGCAACGCCCCC;GTGTTTCGGTCAGCTCT	greyzone	1.34194	0.000778358
MACS_peak_1777	chr2	171177903	171178403	67.2	chr2	171177944	171178362	70.5742	chr2-171178067-171178658	TGGTAGTTCGCCGCATG	greyzone	1.34361	0.00533411
MACS_peak_1847	chr2	207159359	207159859	72	chr2	207159487	207159730	95.4733	chr2-207159015-207159719	GTTGCGAGCAAAGGCCA	greyzone	1.34373	1.21474e-05
MACS_peak_3003	chr6	101328653	101329153	100	chr6	101328695	101329110	100	chr6-101328649-101329269	GGCGGTCACGGGTGTCG	greyzone	1.35856	0.000410853
MACS_peak_3332	chr8	95669463	95670063	61.6667	chr8	95669413	95670112	60.0858	chr8-95669197-95669833	CGGGTGGAAGCCTGGCC	greyzone	1.37792	0.0058475
MACS_peak_1945	chr20	46413362	46414012	80.1538	chr20	46413331	46414043	76.8258	chr20-46413336-46413883	AGAATAATGAGTCTACG;AATATCCGGGTGAACGA	greyzone	1.44339	1.98231e-21
MACS_peak_15	chr1	10328373	10328873	98.2	chr1	10328509	10328736	100	chr1-10328188-10328864	TGCCATGGGGGGGATGG	greyzone	-1.29802	0.0127187
MACS_peak_129	chr1	150594574	150595074	93.2	chr1	150594674	150594973	100	chr1-150594608-150595077	TATGTGGTAAGAATGGT;GTCCGTTGTAGGAGTCC	greyzone	-0.402516	0.0429064
MACS_peak_135	chr1	151955432	151955932	100	chr1	151955409	151955955	100	chr1-151955270-151956036	ATATGTCATACGTGTGT	greyzone	-1.00314	0.0192757
MACS_peak_137	chr1	153171277	153171777	100	chr1	153171447	153171607	100	chr1-153171206-153171824	CGCTGGTCCAGTTAGGG;TGAAAGTTATGCAGCGT	greyzone	-0.379876	0.0156649
MACS_peak_157	chr1	168222949	168223449	100	chr1	168223060	168223337	100	chr1-168222931-168223686	GAGTGCTCAGATGGGGA;TGTGTGTTTAGAACATG	greyzone	-1.00491	0.0126224
MACS_peak_252	chr1	205684088	205684738	71.8462	chr1	205684040	205684785	68.7248	chr1-205684043-205684555	GGACTGGTGGGTGGGTG	greyzone	-0.50456	0.0211046
MACS_peak_268	chr1	217760119	217760619	67	chr1	217760288	217760449	100	chr1-217760284-217760843	TGTAACGCAATATGCGA	greyzone	-1.21622	0.0061971
MACS_peak_29	chr1	28298038	28298538	100	chr1	28298196	28298380	100	chr1-28297860-28298684	TCAGATAATATGAGGGT	greyzone	-1.01068	0.0271809
MACS_peak_303	chr10	6695595	6696095	64	chr10	6695683	6696007	71.6049	chr10-6695775-6696309	GTCGCTGCAGAAGGCGA	greyzone	-0.697787	0.0143923
MACS_peak_585	chr11	118964599	118965099	82.8	chr11	118964621	118965077	85.9649	chr11-118964466-118965013	GGCTGGGGGGAGGGACT	greyzone	-0.937603	0.00114602
MACS_peak_562	.	-1	-1	0	chr11	84162784	84163000	100	chr11-84162700-84163568	TTAATTATATTCTACCC	greyzone	-0.617155	0.0164635
MACS_peak_724	chr12	78665202	78665702	87	chr12	78665381	78665522	100	chr12-78665052-78665637	TGTTTGTCACATGGTCG;GACGTCGCTCGCCCGCC	greyzone	-1.46967	0.000394896
MACS_peak_774	chr12	98989315	98989815	96.2	chr12	98989469	98989660	100	chr12-98989258-98989796	TGGATTCGGGAGGGTGG	greyzone	-0.53194	0.0116982
MACS_peak_907	chr14	51574816	51575316	92.6	chr14	51574984	51575147	100	chr14-51574853-51575673	TGGTCCTGTATAGAGCA	greyzone	-1.08231	0.0311681
MACS_peak_915	chr14	58962539	58963039	93.6	chr14	58962662	58962916	100	chr14-58962429-58963007	CTGCAGGCCCTTTGAGG	greyzone	-1.06442	0.0179027
MACS_peak_924	chr14	63308953	63309453	61.2	chr14	63309102	63309303	88.0597	chr14-63309126-63309432	TTCTCATTTTCTCTGAG	greyzone	-1.30451	5.33587e-05
MACS_peak_961	chr14	87191500	87192000	100	chr14	87191658	87191842	100	chr14-87191245-87192065	GGGACCGTGCTGGGTAG	greyzone	-0.623683	0.0426025
MACS_peak_1025	chr15	52156494	52157044	70.3636	chr15	52156465	52157073	68.4211	chr15-52156181-52156881	GACGCGGGCATGGTGGC	greyzone	-1.20172	0.00600462
MACS_peak_1061	chr15	56983385	56983885	100	chr15	56983558	56983712	100	chr15-56983276-56983967	GCTGGACGCTCGGCGGC	greyzone	-1.48272	2.11649e-06
MACS_peak_1145	chr16	27034389	27034889	100	chr16	27034475	27034802	100	chr16-27034302-27035197	GATTGGGGGCCGTGGGG	greyzone	-0.891021	0.00463213
MACS_peak_1149	chr16	31201378	31201878	82.2	chr16	31201373	31201883	81.5686	chr16-31201467-31202014	GTACGCCTAGTGGCGCT;TGGGGCCCGGCCGAGCG	greyzone	-0.877953	0.00108587
MACS_peak_1130	chr16	6729808	6730308	72.2	chr16	6729957	6730159	100	chr16-6729666-6730169	CCTGAGGAGAGGTAAGG	greyzone	-1.28828	0.00253441
MACS_peak_1169	chr16	69744733	69745233	71	chr16	69744734	69745231	71.2274	chr16-69744608-69745088	TGGTGCTTTTTGAGAGG;GTGCCCCTCTTGGCCGG	greyzone	-1.16402	0.000127926
MACS_peak_1184	chr16	72249587	72250087	65.4	chr16	72249702	72249972	78.5185	chr16-72249413-72249914	AAGTGCGGGGGTGCGGG	greyzone	-0.736997	0.000132942
MACS_peak_1218	chr16	78100833	78101333	93.6	chr16	78100803	78101362	88.9088	chr16-78100865-78101459	TTTGGTATTGTTATTTA	greyzone	-0.98169	0.000145254
MACS_peak_1260	chr17	12741003	12741503	62.8	chr17	12741124	12741381	75.0973	chr17-12740671-12741317	ACGGACAGGGGGGCGGG	greyzone	-0.579913	0.0361253
MACS_peak_1275	chr17	37627698	37628198	94.8	chr17	37627850	37628046	100	chr17-37627724-37628281	GCGCTCCTGGTCGTGGT	greyzone	-0.792546	0.00220822
MACS_peak_1298	chr17	50913960	50914460	94.6	chr17	50914069	50914351	100	chr17-50913867-50914433	GGGTAAGGGCCAATGAG	greyzone	-0.598154	0.0244346
MACS_peak_1301	chr17	51881381	51881881	62.2	chr17	51881505	51881757	74.2063	chr17-51881570-51882363	AAGAGGGGCTCGAGACG;ATTTTATGATCCAGTTG	greyzone	-0.270989	0.0347858
MACS_peak_1358	chr17	64095903	64096403	83.2	chr17	64096010	64096295	100	chr17-64095987-64096963	AGGTTACGGGCTAGTAT	greyzone	-0.978541	0.0436923
MACS_peak_1366	chr17	67357301	67357801	65.8	chr17	67357431	67357671	82.9167	chr17-67357472-67358072	GGTAGCGGTTGTCCGGG	greyzone	-1.19275	0.0177178
MACS_peak_1398	chr17	79816884	79817384	72.2	chr17	79816990	79817277	88.8502	chr17-79816743-79817245	GCGAGGAGTAGGGGGCT	greyzone	-1.10832	0.00793057
MACS_peak_1482	chr19	11728132	11728632	100	chr19	11728243	11728521	100	chr19-11728034-11728758	CCGGGGCGGGGGGGATG	greyzone	-1.01008	0.0244914
MACS_peak_1516	chr19	41797975	41798475	100	chr19	41798050	41798399	100	chr19-41797729-41798498	CCTGGCGGGAGAGATGG	greyzone	-1.32811	0.0110809
MACS_peak_1549	chr19	58264378	58264878	100	chr19	58264480	58264775	100	chr19-58264292-58265150	TTAATAGAACTGCTGGC;CTGTATTTAGATAGGGG	greyzone	-0.33966	0.0127769
MACS_peak_1687	chr2	100737411	100737911	100	chr2	100737546	100737776	100	chr2-100737017-100738153	GCTCTAGAGAGGCCGGC	greyzone	-0.708777	0.0275624
MACS_peak_1747	chr2	151276944	151277444	70.8	chr2	151277112	151277276	100	chr2-151277090-151277738	GCTCGTACCTATGCGGG	greyzone	-0.913519	0.00732412
MACS_peak_1759	chr2	161208940	161209440	83.8	chr2	161208944	161209435	84.5214	chr2-161208891-161209359	AAGGTACTTGTAATTGG	greyzone	-1.09077	0.0200949
MACS_peak_1765	chr2	164882744	164883244	64	chr2	164882911	164883076	92.7273	chr2-164882397-164883064	GCGTCCTGTCAGGGTGT	greyzone	-0.875993	0.0207963
MACS_peak_1778	chr2	171422515	171423015	100	chr2	171422653	171422876	100	chr2-171422469-171423034	GAGTAATAATGCACTAT	greyzone	-1.29692	4.85425e-08
MACS_peak_1818	chr2	192079383	192079883	60.4	chr2	192079533	192079732	75.8794	chr2-192079581-192080262	ATATAGGAGTGGGCAGG	greyzone	-0.882112	0.0133559
MACS_peak_1829	chr2	195980592	195981092	86.4	chr2	195980760	195980924	100	chr2-195980660-195981253	CAGGGGGTTACGGGGGG;TTAGGGTCAACTAATAC;GGTTGGGTTGGTTGGTG	greyzone	-0.480254	0.013889
MACS_peak_1831	chr2	197577697	197578197	100	chr2	197577848	197578045	100	chr2-197577513-197578351	CGGGGACGCGGCTGGGG	greyzone	-1.27076	2.32591e-05
MACS_peak_1560	chr2	2658820	2659320	89.4	chr2	2658982	2659158	100	chr2-2658873-2659424	GAGGGGGTGGTAGCGAA;TGGGGGTCTAGGGGCAT	greyzone	-0.250111	0.00178668
MACS_peak_1601	chr2	29619422	29619922	96.4	chr2	29619579	29619764	100	chr2-29619371-29619904	GAAACGGGAAGCGCTTG;GAGAAAGCAGGCGCTGG	greyzone	-1.04819	0.0126544
MACS_peak_1640	chr2	56274124	56274624	100	chr2	56274258	56274490	100	chr2-56274052-56274746	TTCCTTGTGTGTGATGA	greyzone	-1.34229	0.0111141
MACS_peak_1566	chr2	7606629	7607129	100	chr2	7606704	7607053	100	chr2-7606593-7607185	ATTGACACTGCCGATAG	greyzone	-0.955738	0.0327826
MACS_peak_1674	chr2	84126957	84127457	95.2	chr2	84127109	84127305	100	chr2-84126981-84127509	AGGTGTTGTCTCCACAT	greyzone	-0.799623	0.00713589
MACS_peak_1933	chr20	35869563	35870063	81.2	chr20	35869688	35869938	100	chr20-35869433-35869969	CTCAGTAGTCGAGAAGC;TTTCAGCTGGGTGCAGC	greyzone	-0.699473	0.00808612
MACS_peak_1937	chr20	42274689	42275189	62.6	chr20	42274811	42275066	74.902	chr20-42274577-42275002	TGTACCTTTGGTTAGCC	greyzone	-1.27422	0.0155177
MACS_peak_1951	.	-1	-1	0	chr20	50595206	50595605	93.4837	chr20-50594993-50595579	ACAATGATCTAAGCCGT	greyzone	-1.09784	0.0332086
MACS_peak_1954	chr20	52937123	52937773	77.8462	chr20	52937097	52937798	75.8916	chr20-52937078-52937629	GTTGTTGGGGCGGGCCT	greyzone	-0.739649	0.000525753
MACS_peak_1959	chr20	53365088	53366388	74.4615	chr20	53365044	53366431	72.9632	chr20-53364983-53366056	GATGTGGGCGCGCTGCA	greyzone	-0.919198	0.00594459
MACS_peak_1966	chr20	57478429	57478929	80	chr20	57478397	57478960	76.5542	chr20-57478529-57478981	GCTGTGTTGTTGGAAAA	greyzone	-0.803412	0.00614674
MACS_peak_2050	chr3	3877084	3877584	87	chr3	3877235	3877433	100	chr3-3876962-3877519	ATCTTCCCATGCAGGCC	greyzone	-1.29574	0.00692149
MACS_peak_2054	chr3	6174395	6174895	99.6	chr3	6174576	6174713	100	chr3-6174397-6174918	GCAGCACGCCCTTAAGC;TGAACTAGTTTTGGTGG	greyzone	-0.943229	0.0231019
MACS_peak_2136	chr3	78075028	78075528	96	chr3	78075169	78075386	100	chr3-78075048-78075548	GGGAGGTCAGTGGGAGT	greyzone	-0.594041	0.0208392
MACS_peak_2360	chr4	101946540	101947040	100	chr4	101946611	101946969	100	chr4-101946399-101947488	GGGGGGTCCATTATGGG	greyzone	-1.20209	0.0173269
MACS_peak_2281	chr4	14067084	14067584	79	chr4	14067204	14067464	100	chr4-14067189-14067764	ATGGGGGTGCATCGCGG;ACGTGCTAGGTGGCTGG	greyzone	-0.6651	0.00036445
MACS_peak_2266	chr4	3584487	3584987	64	chr4	3584652	3584821	91.1243	chr4-3584667-3585219	GCGATCAGCGCTATAGA	greyzone	-0.828521	0.0339412
MACS_peak_2306	chr4	47361019	47361519	100	chr4	47361173	47361365	100	chr4-47361012-47361562	GAAAGGATAGTGGGGAG	greyzone	-0.735876	0.0198168
MACS_peak_2334	chr4	77969379	77969879	66.8	chr4	77969532	77969726	100	chr4-77969395-77969729	CCGAGACGCGCATACGG	greyzone	-0.545005	0.0422423
MACS_peak_2776	chr5	149826183	149826683	75.4	chr5	149826299	149826566	97.7528	chr5-149826072-149826560	GTGGGGTGCCAGGAGCG	greyzone	-0.491939	0.0258729
MACS_peak_2826	chr5	179155564	179156064	76.8	chr5	179155586	179156041	79.5604	chr5-179155431-179155948	TAGACGCACTTCTTGGA	greyzone	-0.785969	0.00103867
MACS_peak_2449	chr5	19066656	19067156	79	chr5	19066790	19067022	100	chr5-19066761-19067209	CCTTGGGAGTGCTCCCG;GAACGTAGCGTGGTGGT	greyzone	-1.01464	5.82495e-05
MACS_peak_2463	chr5	26843027	26843527	66.8	chr5	26843225	26843329	100	chr5-26843193-26843747	TGACACGGGGGGATCGC	greyzone	-0.972234	0.0177943
MACS_peak_2486	chr5	40568696	40569196	100	chr5	40568700	40569192	100	chr5-40568572-40569202	TAGGTTAGCCGACGCTG	greyzone	-1.38048	0.00150951
MACS_peak_2515	chr5	42671187	42671687	73.8	chr5	42671328	42671546	100	chr5-42671318-42671970	GGTAGGGGGTTGCTTAG;TGGCGGAGTGGGGCGTG	greyzone	-1.21016	0.0059726
MACS_peak_2545	chr5	43850074	43850574	100	chr5	43850164	43850484	100	chr5-43849916-43850660	ACCAAGGGAAGTCGGGG	greyzone	-1.21558	0.00653682
MACS_peak_2554	chr5	44207889	44208389	94.6	chr5	44208014	44208264	100	chr5-44207916-44208865	CCGGCGGGCCCAGTACG	greyzone	-0.665775	0.0200794
MACS_peak_2559	chr5	44602693	44603193	100	chr5	44602778	44603108	100	chr5-44602656-44603341	TAGTGGGGGGTCCGGAG	greyzone	-0.692148	0.00770091
MACS_peak_2632	chr5	80876177	80876677	88	chr5	80876295	80876558	100	chr5-80876084-80876617	AGGGTCTCTGGGCTAGC	greyzone	-0.960187	0.0425225
MACS_peak_3025	chr6	117709724	117710224	60	chr6	117709875	117710073	90.404	chr6-117709754-117710054	GGGAGAAAGGGGGTTGG	greyzone	-1.08358	0.0106447
MACS_peak_2922	chr6	58774182	58774682	92.2	chr6	58774235	58774628	100	chr6-58774221-58774942	GACTCTGTTGGGAGGCG;TAGAACATTGCATCTAC	greyzone	-0.460703	0.0221585
MACS_peak_2957	chr6	77830556	77831056	72.4	chr6	77830719	77830893	100	chr6-77830694-77831269	GATGTGCACGTGGATCG;TTAATGCGGCCAGGCAG	greyzone	-0.143686	0.0443242
MACS_peak_3084	chr7	2403838	2404338	69.8	chr7	2403987	2404189	99.0099	chr7-2403989-2404503	CACAGGCGGCCTCGGTT;CAACCCGTCGGCCTTAC	greyzone	-0.440968	0.00621005
MACS_peak_3382	chr8	115247499	115247999	100	chr8	115247628	115247869	100	chr8-115247446-115248223	CTCTCTAAGGACCATAC	greyzone	-1.44869	0.00109444
MACS_peak_3323	chr8	89793293	89793793	62.4	chr8	89793423	89793662	76.1506	chr8-89793095-89793605	GGGTGGAATCGATGTGC	greyzone	-0.883	0.0181019
MACS_peak_3547	chr9	123943556	123944056	91.8	chr9	123943655	123943956	100	chr9-123943597-123944269	TGAAATTGTAGCCTACT	greyzone	-1.32402	0.00867631
MACS_peak_3606	chrX	102930926	102931426	88.8	chrX	102931092	102931259	100	chrX-102930881-102931370	GGCGTTGTGGTGTTGAG;GCCGCGGGGGGGGGTGG	greyzone	-0.306739	0.00118155
MACS_peak_117	chr1	115259955	115260755	65.5	chr1	115259914	115260796	62.6984	chr1-115260231-115260784	CGGGACTCTCGCTACTG;CTAACGTGTGAGTAGGT	negatives	0.176605	0.270677
MACS_peak_75	chr1	68455060	68455560	70	chr1	68455210	68455409	100	chr1-68454326-68455410	AGGGAGATGTTGTGCTG;TGGTGAGTCGAGTGCGG	negatives	-0.428753	0.0714989
MACS_peak_108	chr1	111188282	111188782	91.8	chr1	111188449	111188614	100	chr1-111188323-111188928	CAAAGTGAAGGGTAGAA	negatives	0.440072	0.414985
MACS_peak_112	chr1	111907528	111908028	100	chr1	111907180	111907498	59.1195	chr1-111907310-111908032	CGGCTAGGTCGTCGGGG	negatives	0.4141	0.421394
MACS_peak_114	chr1	113237982	113238482	75	chr1	113238115	113238348	100	chr1-113237863-113238357	GTTTTCACAAGAATTTC	negatives	0.399231	0.386605
MACS_peak_126	chr1	144892308	144892808	77.2	chr1	144892500	144892615	100	chr1-144892422-144893548	GGGTGAGACGACGGGGT	negatives	0.40324	0.365466
MACS_peak_127	chr1	145105493	145105993	77	chr1	145105462	145106023	74.1533	chr1-145105371-145105878	TGGACCGGTCCGTGAGC	negatives	0.44363	0.176668
MACS_peak_130	chr1	150938169	150938669	68.4	chr1	150938125	150938712	65.7581	chr1-150937920-150938511	AGATCGGCTAAGAGTGC	negatives	0.140978	0.654228
MACS_peak_143	chr1	154865293	154865793	96.8	chr1	154865438	154865648	100	chr1-154865255-154865777	CTCGTGTTGAGTGGGCT	negatives	-0.429277	0.360992
MACS_peak_155	chr1	163787783	163788283	89.4	chr1	163787906	163788160	100	chr1-163787836-163788492	GATTTGTTGGAGTGGGA	negatives	-0.0524941	0.929107
MACS_peak_169	chr1	170964816	170965316	100	chr1	170964908	170965223	100	chr1-170964717-170965394	TCGAGATTACCTCAGTG	negatives	0.49975	0.139633
MACS_peak_205	chr1	188958007	188958507	85.6	chr1	188958176	188958337	100	chr1-188957668-188958435	CAGCTTGCTTGCGCAGG	negatives	0.453172	0.457451
MACS_peak_210	chr1	190549382	190549882	97.8	chr1	190549514	190549750	100	chr1-190549160-190549871	CTCCGAGATTAGGAGCG	negatives	0.262592	0.5256
MACS_peak_213	chr1	191742790	191743290	85.6	chr1	191742976	191743103	100	chr1-191742539-191743218	TCGCCTGCTTTCCGGGG	negatives	0.260265	0.600792
MACS_peak_219	chr1	193660865	193661365	85.2	chr1	193660961	193661268	100	chr1-193660939-193661429	CTCAGTGTATCATTTGT	negatives	-0.0148514	0.987436
MACS_peak_240	chr1	200017547	200018047	100	chr1	200017693	200017901	100	chr1-200017267-200018190	AAAGGAACAAGGTCCAG	negatives	0.442829	0.422536
MACS_peak_25	chr1	24018902	24019402	82	chr1	24019030	24019273	100	chr1-24018810-24019312	GCTCCAGCGCGGAGGCT	negatives	-0.0204316	0.972519
MACS_peak_254	chr1	207135083	207135583	60	chr1	207135165	207135501	64.881	chr1-207135283-207135837	TTATGGGGCGGGGGTCG	negatives	-0.436288	0.423658
MACS_peak_26	chr1	24020049	24020549	100	chr1	24020174	24020423	100	chr1-24019990-24020587	TTATTGGCCGTTTGGGG	negatives	-0.171554	0.801327
MACS_peak_28	chr1	24022059	24022559	100	chr1	24022203	24022414	100	chr1-24021853-24022675	TTCAGGAGGGACGCACG	negatives	0.13679	0.765734
MACS_peak_288	chr1	240172338	240172838	78.4	chr1	240172475	240172700	100	chr1-240172446-240172975	GGGAAGTACACTTTGGC	negatives	0.260031	0.305803
MACS_peak_32	chr1	35649795	35650295	100	chr1	35649863	35650226	100	chr1-35649533-35650590	AGCTCTCGACAGTACGC	negatives	-0.484113	0.351532
MACS_peak_52	chr1	45976649	45977149	100	chr1	45976729	45977068	100	chr1-45976637-45977270	GTTGGTCAGTGGTGAGC	negatives	-0.288929	0.457689
MACS_peak_72	chr1	66488708	66489208	94.2	chr1	66488861	66489054	100	chr1-66488737-66489303	GGTCGTAGTGTTAATGT	negatives	0.134387	0.860803
MACS_peak_99	chr1	107363910	107364910	68	chr1	107363877	107364942	63.8498	chr1-107364075-107364755	TAGCTCTGAGCTCGATG	negatives	-0.857135	0.0672417
MACS_peak_295	chr10	858654	859154	69.8	chr10	858814	858994	100	chr10-858496-859003	CTAAGTTTGACCGCAGT;GGCGCAGGCCCGCCGGT	negatives	-0.187895	0.775592
MACS_peak_300	chr10	3531980	3532480	76.6	chr10	3532137	3532322	100	chr10-3532097-3532831	TGGTCAGACTGCAACCG	negatives	0.0794644	0.94547
MACS_peak_301	chr10	4294087	4294587	92.4	chr10	4294159	4294514	100	chr10-4294125-4294839	CAGCTACGAGGCACGGG	negatives	-0.0875716	0.815233
MACS_peak_310	chr10	9166568	9167068	100	chr10	9166654	9166981	100	chr10-9166399-9167205	GGTGTTAGTGGAGGTAT	negatives	0.289029	0.54442
MACS_peak_318	chr10	15165805	15166305	70.8	chr10	15165817	15166293	71.8487	chr10-15165643-15166159	GCTAAAGCATTGCGGCT	negatives	0.14084	0.805965
MACS_peak_333	chr10	24577581	24578181	80.5	chr10	24577539	24578223	76.7544	chr10-24577698-24578471	TGGGTTAAGAGGTACAA	negatives	0.721044	0.266954
MACS_peak_361	chr10	61497865	61498365	75.2	chr10	61497997	61498232	100	chr10-61497648-61498241	CTACGTTAAATGGGTAA	negatives	-0.475712	0.0542518
MACS_peak_365	chr10	65497738	65498238	100	chr10	65497867	65498108	100	chr10-65497573-65498440	GGCGCAGGCTAGGGCTG	negatives	0.173818	0.585258
MACS_peak_379	chr10	83701552	83702052	63	chr10	83701673	83701930	75.4864	chr10-83701369-83701867	CAGGGTTGGGGCTGGGC	negatives	0.0372972	0.958573
MACS_peak_391	chr10	91635459	91635959	92.2	chr10	91635590	91635828	100	chr10-91635498-91636054	TCTGACGAGGCGGGCGG	negatives	-0.0283096	0.962743
MACS_peak_394	chr10	95182398	95182898	100	chr10	95182582	95182713	100	chr10-95182368-95182935	CGCGGGTAGATCGGATG	negatives	-0.325186	0.16972
MACS_peak_401	chr10	99888794	99889294	71.2	chr10	99888944	99889144	100	chr10-99888938-99889492	TGTGGCCATGCAATACA	negatives	0.38169	0.409146
MACS_peak_404	chr10	102052071	102052571	95.4	chr10	102052212	102052430	100	chr10-102052094-102052740	TTGGTATTTCGATGGGT	negatives	-0.897099	0.155908
MACS_peak_406	chr10	105199988	105200488	85.8	chr10	105200102	105200374	100	chr10-105200059-105200696	GAGCCAGGTGGGGAGCA	negatives	0.442607	0.259725
MACS_peak_408	chr10	106637091	106637591	67.8	chr10	106637213	106637469	84.7656	chr10-106636857-106637430	GGGGAGTACGAGCTATT	negatives	0.387732	0.399643
MACS_peak_509	chr11	63456803	63457303	82.6	chr11	63456980	63457126	100	chr11-63456510-63457216	GAGTTGCGGCGAGGGTG;CCGGGGCGGTTAGAGAG	negatives	-0.0396032	0.998152
MACS_peak_474	chr11	27912329	27912829	67.8	chr11	27912517	27912640	100	chr11-27912490-27913178	GCGGTGCGGTGCCTCTC;GCTCGGCGTGCGTGGGG	negatives	-0.253509	0.124081
MACS_peak_452	chr11	10818533	10819033	66.2	chr11	10818658	10818908	82.4	chr11-10818113-10818864	CGTTGTTCAGGTATTAC	negatives	-0.10621	0.844007
MACS_peak_467	chr11	19668252	19668752	100	chr11	19668353	19668650	100	chr11-19668156-19668983	TGGGTGCGAGATGGGAC	negatives	0.294613	0.663962
MACS_peak_502	chr11	61748564	61749064	90.2	chr11	61748703	61748924	100	chr11-61748613-61749650	GGGATGGAGTCACAGCA	negatives	-0.41078	0.623495
MACS_peak_544	chr11	79714525	79715025	72.8	chr11	79714664	79714885	100	chr11-79714022-79714889	GGTTGGCTAGGTGGAGT	negatives	0.175836	0.836819
MACS_peak_546	chr11	79943460	79943960	71	chr11	79943635	79943784	100	chr11-79943605-79944278	GACCGGTCGGGCGGAGC	negatives	0.292152	0.219989
MACS_peak_547	chr11	79949363	79949863	100	chr11	79949491	79949735	100	chr11-79949118-79950012	GAAGTGGTGGGCGGGCG	negatives	0.479513	0.127383
MACS_peak_548	chr11	80091762	80092262	68.2	chr11	80091812	80092211	72.6817	chr11-80091921-80092571	GGGTGGGAAAACTCCGG	negatives	-0.125263	0.879658
MACS_peak_554	chr11	81790452	81790952	96.4	chr11	81790584	81790820	100	chr11-81790403-81790934	ATTGTATGAGAGGACAA	negatives	0.126683	0.839399
MACS_peak_574	chr11	97802100	97802600	77.8	chr11	97802251	97802448	100	chr11-97801917-97802489	ACTTTTTGCTACAGACG	negatives	-0.248965	0.554034
MACS_peak_581	chr11	116091841	116092341	98	chr11	116091992	116092190	100	chr11-116091837-116092331	ATGGCCGAACTGGACTG	negatives	-0.581025	0.210429
MACS_peak_583	chr11	118272110	118272610	61.6	chr11	118272204	118272515	68.8103	chr11-118271781-118272418	GTCGTTTGGTGCGGGGG	negatives	0.57493	0.467424
MACS_peak_584	chr11	118621977	118622477	98.4	chr11	118622085	118622368	100	chr11-118621939-118622469	GTTGGAGGCGGAATACA	negatives	-0.585954	0.0880524
MACS_peak_743	chr12	83355915	83356415	78.8	chr12	83356040	83356290	100	chr12-83355828-83356309	GTATCGTAAGTACCCGA;ACGCAGCGCATGCTTTG	negatives	-0.37624	0.433694
MACS_peak_798	chr12	119343103	119343603	73	chr12	119343241	119343465	100	chr12-119343238-119343784	GGAAGGCGTAGGATATC;CTCGTTGGTTAGCCTTC	negatives	0.26956	0.735377
MACS_peak_732	chr12	81289292	81289792	100	chr12	81289418	81289666	100	chr12-81289196-81289915	CGGCCATTGCACTGCGC;GGGAGAGTGTCGTGCGG	negatives	0.192031	0.608889
MACS_peak_785	chr12	105235480	105235980	93.8	chr12	105235605	105235855	100	chr12-105235511-105236123	TTGTGTGGAGCAGGCAA;GTATGATTCGATGAGAC	negatives	0.499452	0.107009
MACS_peak_603	chr12	6630012	6630512	90.4	chr12	6630110	6630414	100	chr12-6630060-6630628	GACAATTTAGCTTGGGG	negatives	-0.693142	0.120557
MACS_peak_613	chr12	12312113	12312613	60	chr12	12312269	12312457	76.5957	chr12-12311578-12312413	TTACGCTCAGATCAGCC	negatives	-0.666313	0.0937157
MACS_peak_624	chr12	27126748	27127248	100	chr12	27126909	27127087	100	chr12-27126651-27127352	GCATATCCATAAGGTGA	negatives	0.0281976	0.975741
MACS_peak_644	chr12	50157935	50158435	100	chr12	50157894	50158476	100	chr12-50157881-50158484	GCATGGCTGAAATCAGG	negatives	-0.42843	0.465685
MACS_peak_654	chr12	54062784	54063284	67.4	chr12	54062954	54063114	100	chr12-54062947-54063457	GGTCTCGTGTTGAGGTG	negatives	0.0199488	0.964882
MACS_peak_657	chr12	56119718	56120218	88.8	chr12	56119870	56120066	100	chr12-56119321-56120162	GAGCTGCCTCTGCGCCT	negatives	-0.9924	0.0544302
MACS_peak_703	chr12	72329682	72330182	100	chr12	72329840	72330023	100	chr12-72329618-72330345	ACGTGAGGCATGGAGAT	negatives	0.219228	0.70737
MACS_peak_718	chr12	77463960	77464460	100	chr12	77464090	77464329	100	chr12-77463792-77464640	ACGAGGGTGGGGACTAC	negatives	0.265862	0.664983
MACS_peak_729	chr12	80039932	80040432	85.6	chr12	80040089	80040274	100	chr12-80039846-80040360	GAGGGCTGAAGAGGGAG	negatives	0.236793	0.565424
MACS_peak_731	chr12	81278040	81278540	82	chr12	81278203	81278377	100	chr12-81278130-81278674	AGATGAAAGGTGGGGGA	negatives	-0.0371096	0.920637
MACS_peak_738	chr12	82164453	82164953	100	chr12	82164622	82164783	100	chr12-82164375-82164970	TATTCCCTCGGCGTCGG	negatives	0.271988	0.431878
MACS_peak_753	chr12	89700471	89700971	99.4	chr12	89700599	89700842	100	chr12-89700458-89700968	GGGGCGTGCATGGGCGC	negatives	-0.217534	0.602358
MACS_peak_754	chr12	90110705	90111205	100	chr12	90110803	90111107	100	chr12-90110671-90111320	ACTTCGGTCATCTGTAC	negatives	-0.548953	0.136825
MACS_peak_758	chr12	90575312	90575812	98.8	chr12	90575496	90575627	100	chr12-90575254-90575806	CGGGATGAGTCATGGCA	negatives	0.189068	0.744882
MACS_peak_761	chr12	91210756	91211256	74	chr12	91210898	91211113	100	chr12-91210375-91211126	GTCATGTCGGGGTGAGC	negatives	0.342231	0.429203
MACS_peak_784	chr12	104742784	104743284	83	chr12	104742861	104743206	97.971	chr12-104742653-104743199	TGACCCCTTGCAGTCAA	negatives	0.2707	0.278861
MACS_peak_787	chr12	106968866	106969366	89	chr12	106969025	106969207	100	chr12-106968921-106969414	GGTTCAATGTAACGAGG	negatives	-0.405035	0.348016
MACS_peak_793	chr12	111158356	111158856	100	chr12	111158485	111158727	100	chr12-111158351-111158896	AGGGTCTTTCCGTCCGG	negatives	0.299992	0.429952
MACS_peak_811	chr12	126984907	126985407	87.6	chr12	126985035	126985278	100	chr12-126984969-126985653	AAGGCGATGAAGGGGGC	negatives	-0.069459	0.873596
MACS_peak_815	chr12	130594876	130595376	78.4	chr12	130595005	130595246	100	chr12-130594984-130595587	GAGGTCGGCGGGGCCGG	negatives	0.0196307	0.981467
MACS_peak_836	chr13	35050732	35051232	84.6	chr13	35050833	35051131	100	chr13-35050809-35051338	GGAGGCGGGTGGGCGCG;TAGGTATACCTCTGGCG	negatives	0.00445327	0.999214
MACS_peak_857	chr13	75988349	75988849	62.8	chr13	75988519	75988679	90	chr13-75988535-75989309	TGTAGACTAACTAATTG	negatives	-0.886513	0.125925
MACS_peak_874	chr14	25301475	25301975	100	chr14	25301607	25301842	100	chr14-25301337-25302316	GGTCCGGGTGGGTCGTT	negatives	-0.408205	0.129528
MACS_peak_897	chr14	43907554	43908054	80	chr14	43907664	43907943	100	chr14-43907266-43907954	GGGCGTTTGTACGCGGA	negatives	0.0975528	0.804105
MACS_peak_912	chr14	58655544	58656044	80.8	chr14	58655666	58655921	100	chr14-58655640-58656373	TAGATGGTACGCCCGCG	negatives	0.200437	0.446902
MACS_peak_918	chr14	60818043	60818543	98.2	chr14	60818210	60818376	100	chr14-60818052-60818770	GACCGGGGTGCGAGAGG	negatives	0.127734	0.786033
MACS_peak_975	chr14	94698685	94699185	100	chr14	94698809	94699061	100	chr14-94698516-94699198	CAGTGCATATTTGCCGC	negatives	0.211635	0.628313
MACS_peak_977	chr14	96991422	96991922	88.2	chr14	96991591	96991753	100	chr14-96991304-96991863	TCCGACAATAGGTGGCG	negatives	0.372406	0.548906
MACS_peak_994	chr14	105235706	105236206	66.2	chr14	105235811	105236100	78.2007	chr14-105235423-105236037	ATGATCATGGTGGATGT	negatives	0.0562913	0.87376
MACS_peak_1006	chr15	34962861	34963361	86.4	chr15	34962985	34963237	100	chr15-34962929-34963586	AACCTTTTAAACAATTG	negatives	0.0116259	0.983683
MACS_peak_1026	chr15	52632260	52632760	100	chr15	52632317	52632703	100	chr15-52632136-52632789	CTCGGGTCAGAGGGGCG	negatives	0.128339	0.801451
MACS_peak_1035	chr15	53864335	53864835	89.2	chr15	53864407	53864763	100	chr15-53864105-53864781	ATGAGAGAAAGGCAGAG	negatives	-0.535297	0.380891
MACS_peak_1038	chr15	54001810	54002310	94.6	chr15	54001837	54002282	100	chr15-54001837-54002358	ACCGTGGTGTAGGGGGT	negatives	-0.0605534	0.904664
MACS_peak_1045	chr15	54601986	54602486	83.2	chr15	54602130	54602342	100	chr15-54601833-54602402	TCCGTCGGACCGGCAGT	negatives	0.316833	0.171779
MACS_peak_1071	chr15	64448779	64449279	100	chr15	64448925	64449133	100	chr15-64448728-64449281	GGGATATTGGTCTAGCC	negatives	0.0131605	0.981535
MACS_peak_1075	chr15	66791612	66792112	100	chr15	66791718	66792006	100	chr15-66791509-66792218	CGGCCGGGAGTGGGGGC	negatives	0.216516	0.653914
MACS_peak_1079	chr15	71351629	71352129	69.6	chr15	71351778	71351980	98.5149	chr15-71351312-71351977	AGCCGGCCGCCGGACGG	negatives	0.0842708	0.864916
MACS_peak_1083	chr15	72498962	72499462	91	chr15	72499035	72499388	100	chr15-72499007-72499691	GACGTACAGGTATCGGA	negatives	0.18213	0.753766
MACS_peak_1085	chr15	72511087	72511587	100	chr15	72511253	72511421	100	chr15-72510833-72511592	TCCTGGGGGAGGGCATG	negatives	-0.912476	0.0624355
MACS_peak_1110	chr15	98981968	98982468	91.6	chr15	98982124	98982312	100	chr15-98982010-98982529	GGCGGGATGGCCGAAGG	negatives	-0.166767	0.793135
MACS_peak_1241	chr16	87866279	87866779	97.8	chr16	87866387	87866670	100	chr16-87866290-87866859	AGTTGCTAGACCCGGTG;AGGGTGTGGGTGGGGGT	negatives	0.579166	0.448251
MACS_peak_1165	chr16	65637516	65638016	78	chr16	65637688	65637844	100	chr16-65637237-65637906	GTGATGGAGCGACCGTT	negatives	0.232072	0.720292
MACS_peak_1177	chr16	70598770	70599270	99	chr16	70598906	70599134	100	chr16-70598775-70599336	GACCGGGGCGGGCATCA	negatives	0.676534	0.216373
MACS_peak_1178	chr16	70605548	70606048	94.2	chr16	70605564	70606032	97.2222	chr16-70605577-70606176	CAGAGGCATGGGCGGGG	negatives	-0.116555	0.857738
MACS_peak_1182	.	-1	-1	0	chr16	71419860	71420135	100	chr16-71419565-71420214	TTGCTAACAGGGAGAAC	negatives	0.379561	0.235788
MACS_peak_1196	chr16	74288220	74288720	100	chr16	74288307	74288632	100	chr16-74288195-74288748	AGACGATGGCGTTGGTT	negatives	0.497482	0.263774
MACS_peak_1207	chr16	76318171	76318671	98.8	chr16	76318303	76318538	100	chr16-76318130-76318665	TCGTGACGGGAGGGACC	negatives	0.0682351	0.895775
MACS_peak_1208	chr16	76562639	76563139	84.6	chr16	76562749	76563029	100	chr16-76562160-76563062	ACCTCCCGTCTAGATAC	negatives	-0.453987	0.134686
MACS_peak_1209	chr16	76631560	76632060	100	chr16	76631699	76631921	100	chr16-76631278-76632090	CACGGGTGAGGCTCTGC	negatives	-0.434104	0.0997325
MACS_peak_1220	chr16	78833774	78834274	100	chr16	78833950	78834097	100	chr16-78833759-78834481	GGCTACGGTGAGGAGGG	negatives	0.571101	0.370256
MACS_peak_1223	chr16	79474531	79475031	62.2	chr16	79474682	79474880	80.8081	chr16-79474247-79474842	GTGGTGCACAAAGGGTG	negatives	0.267043	0.330942
MACS_peak_1231	chr16	83404809	83405309	61.4	chr16	83404920	83405197	70.7581	chr16-83404301-83405116	TCGTACAGGTCACCTTG	negatives	-0.288533	0.721527
MACS_peak_1235	chr16	84264268	84264768	76.2	chr16	84264297	84264738	79.5918	chr16-84264387-84264955	GCATGGCTCGGTCACTG	negatives	-0.40167	0.0949005
MACS_peak_1302	chr17	52151377	52151877	84	chr17	52151504	52151750	100	chr17-52151457-52152147	GCGTATGTTATGGTTTC;GAGCCGTTGGGGTGGCG	negatives	0.353831	0.112689
MACS_peak_1318	chr17	57015276	57016076	87	chr17	57015248	57016103	81.4035	chr17-57015355-57016051	TGAGGCGCGGACTCGTG;GGGCTCCTACCGTAGCG	negatives	-0.248054	0.198814
MACS_peak_1249	chr17	1562953	1563453	77.6	chr17	1563055	1563350	96.6102	chr17-1563065-1563656	GAGGCGGGGAACGACGC	negatives	0.418122	0.566365
MACS_peak_1255	chr17	4849826	4850326	96.6	chr17	4849890	4850262	100	chr17-4849629-4850309	TAGGCGGCGTTCCTAGG	negatives	-0.310043	0.350554
MACS_peak_1271	chr17	28137082	28137582	80.4	chr17	28137210	28137454	100	chr17-28136693-28137484	ACGGTGGACAGGGGAGC	negatives	0.350808	0.247586
MACS_peak_1277	chr17	38544840	38545340	90.6	chr17	38544999	38545180	100	chr17-38544887-38545621	GGCCGACGGGCAATCCG	negatives	-0.547059	0.324552
MACS_peak_1285	chr17	45734081	45734581	74.4	chr17	45734192	45734470	93.8849	chr17-45733852-45734453	CAGGTGACCGGGGAACA	negatives	-0.45782	0.348975
MACS_peak_1297	chr17	50384513	50385013	60	chr17	50384673	50384852	78.2123	chr17-50384229-50384813	GGGATCGCGGGCAGGGT	negatives	0.02432	0.964456
MACS_peak_1306	chr17	54124340	54124840	61.6	chr17	54124501	54124678	83.0508	chr17-54123966-54124648	GTGTGTAGGCGGGGTTC	negatives	-0.606461	0.217924
MACS_peak_1320	chr17	57752300	57752800	74.6	chr17	57752298	57752801	74.3539	chr17-57752427-57752983	GTTTAGTTCAGTCCAGG	negatives	0.411447	0.185134
MACS_peak_1369	chr17	68640705	68641205	100	chr17	68640838	68641072	100	chr17-68640393-68641205	CATTGGCTGTGGAGCGG	negatives	-0.231809	0.534316
MACS_peak_1370	chr17	68685354	68685854	68.8	chr17	68685490	68685718	100	chr17-68685482-68685826	GGGGCCTGGCCGGGGCA	negatives	0.0583883	0.937435
MACS_peak_1373	chr17	71467099	71467599	85.6	chr17	71467221	71467477	100	chr17-71466902-71467527	GAGGTTTGCGTGCGAGT	negatives	0.321525	0.594151
MACS_peak_1403	chr17	80572122	80572622	91	chr17	80572276	80572468	100	chr17-80572167-80572830	GTCGCTGTACAAGTAAT	negatives	0.297652	0.583112
MACS_peak_1446	chr18	73440005	73440505	71.4	chr18	73440141	73440369	96.9298	chr18-73439861-73440362	CCGCGGACCGGCGACCA;ATTTGATTGGTTTCCGC	negatives	-0.395367	0.191713
MACS_peak_1420	chr18	13206930	13207430	82.8	chr18	13207077	13207282	100	chr18-13207016-13207651	GATTGGCGCTGGTCGGG	negatives	-0.37468	0.405328
MACS_peak_1426	chr18	31062389	31062889	88.4	chr18	31062518	31062759	100	chr18-31062172-31062831	TCGCTCGAGGGGTCGAT	negatives	-0.127979	0.781071
MACS_peak_1477	chr19	8553462	8553962	82	chr19	8553548	8553875	99.0826	chr19-8553251-8553872	GAGGGACAATCGCAGTC;AGTCGCACAGTGTGTTT	negatives	0.163562	0.65412
MACS_peak_1541	chr19	54675427	54675927	75.6	chr19	54675505	54675848	87.4636	chr19-54675269-54675805	TTTCTTCGCGTGTGGTA;GGGAGCCCGTTGTCCGA	negatives	-0.295319	0.650589
MACS_peak_1453	chr19	811341	811841	98.4	chr19	811469	811713	100	chr19-811241-811833	GTGACGCTCAGGCGGCC	negatives	0.468245	0.395308
MACS_peak_1457	chr19	2272801	2273301	90.8	chr19	2272912	2273189	100	chr19-2272847-2273338	TACGTGGCCCTGTACGT	negatives	0.351178	0.235596
MACS_peak_1486	chr19	13054356	13054856	100	chr19	13054368	13054844	100	chr19-13054252-13054868	CTAGCTTGGCTGGAGGA	negatives	-0.852629	0.080751
MACS_peak_1499	.	-1	-1	0	chr19	27731764	27732892	62.1454	chr19-27731966-27732667	TTAATAGTGGAATAATG	negatives	-0.729839	0.112218
MACS_peak_1534	chr19	50191235	50191735	60.6	chr19	50191401	50191569	81.5476	chr19-50190975-50191538	GGTCAATTGGCGGGGCG	negatives	-0.0413175	0.921433
MACS_peak_1619	chr2	41905576	41906076	94.6	chr2	41905698	41905954	100	chr2-41905603-41906090	ACGGTCAATTGTCGTGT;ACATGCTAGATCGGATG	negatives	0.309116	0.165247
MACS_peak_1579	chr2	17205702	17206202	87.2	chr2	17205827	17206077	100	chr2-17205702-17206138	TCGGGGGGGTGCCGAGG;CCGATACCGTCCAGCTC	negatives	0.018816	0.998026
MACS_peak_1838	chr2	200798782	200799282	99.4	chr2	200798902	200799161	100	chr2-200798785-200799332	TGTGGGTGGGTTAAGGT;CCGGCAGGCAGGGAACG	negatives	0.0388149	0.797268
MACS_peak_1636	chr2	54045775	54046275	68.6	chr2	54045901	54046148	87.4494	chr2-54045932-54046634	GATTTTGGGTCGGCGGG;GATCGTCGTACAAGGGG	negatives	-0.0348837	0.479445
MACS_peak_1854	chr2	211347411	211347911	88.6	chr2	211347518	211347803	100	chr2-211347468-211348089	AAAAAGGATGATCACAA;TAGTGATAGCGGGTGCC	negatives	0.227596	0.324161
MACS_peak_1558	chr2	1730732	1731232	78	chr2	1730848	1731115	100	chr2-1730842-1731703	ATATGATGTCGCCATAC	negatives	0.0426116	0.964993
MACS_peak_1564	chr2	5272627	5273127	86	chr2	5272757	5272997	100	chr2-5272550-5273057	GCTTATCCTTCGTATTC	negatives	0.0600864	0.948233
MACS_peak_1583	chr2	18216211	18216711	100	chr2	18216326	18216596	100	chr2-18216148-18216716	AACTTTTTTCCCCACGT	negatives	-0.0888424	0.846312
MACS_peak_1605	chr2	30506665	30507165	98.6	chr2	30506798	30507032	100	chr2-30506672-30507486	ATAGAAGGGCGGTTAGT	negatives	0.234797	0.558957
MACS_peak_1606	chr2	31186810	31187310	74.8	chr2	31186889	31187230	86.5103	chr2-31186327-31187184	GCCTGTGCACGCTCTTT	negatives	0.246015	0.681513
MACS_peak_1607	chr2	31737494	31737994	90.2	chr2	31737651	31737837	100	chr2-31737110-31737945	CTGTCTGGCCGTTTTGC	negatives	0.187278	0.791951
MACS_peak_1613	chr2	38976505	38977005	100	chr2	38976615	38976895	100	chr2-38976339-38977010	TCCGGGGTCGAGGCAGC	negatives	0.291948	0.355059
MACS_peak_1624	chr2	45133991	45134491	100	chr2	45134100	45134382	100	chr2-45133756-45134569	TGTAGGGGCGCTAGTGG	negatives	0.209781	0.70204
MACS_peak_1641	chr2	56350934	56351434	91.2	chr2	56351097	56351270	100	chr2-56350978-56351549	AACATACTTTGGCACCA	negatives	-0.305418	0.304474
MACS_peak_1643	chr2	57797355	57797855	100	chr2	57797473	57797736	100	chr2-57797165-57797865	CGAGCCTGCCCAGTCCG	negatives	0.269542	0.72961
MACS_peak_1658	chr2	70314844	70315344	88.4	chr2	70314913	70315275	100	chr2-70314902-70315399	GGGAGAGCTGACACTGG	negatives	0.233901	0.556782
MACS_peak_1676	chr2	86653275	86653775	67.2	chr2	86653334	86653716	72.5131	chr2-86653439-86654222	AGTGGGGGGAGCGCAGG	negatives	0.338836	0.422955
MACS_peak_1679	.	-1	-1	0	chr2	92281241	92281566	100	chr2-92280732-92281572	CAGCTGAGTGATATTGA	negatives	0.110158	0.856131
MACS_peak_1680	.	-1	-1	0	chr2	92305620	92305908	79.8611	chr2-92305395-92305850	CGGGTTTACTTGCGTTA	negatives	-0.0339916	0.938633
MACS_peak_1685	chr2	99740084	99740584	93	chr2	99740187	99740480	100	chr2-99740119-99740769	TGGGGGTGTATGGGCGC	negatives	-1.09571	0.0685955
MACS_peak_1686	chr2	100412974	100413474	95	chr2	100413105	100413343	100	chr2-100412999-100413618	TTCCCTGCGAGCACGCT	negatives	0.353561	0.552646
MACS_peak_1698	chr2	113931247	113931747	95.4	chr2	113931359	113931634	100	chr2-113931044-113931724	CCCCCAAGCAATATCTC	negatives	-0.09663	0.813075
MACS_peak_1713	chr2	123717375	123717875	100	chr2	123717538	123717711	100	chr2-123717230-123717953	GGATGCTGGATGTCAAG	negatives	0.368208	0.127566
MACS_peak_1725	.	-1	-1	0	chr2	133034245	133034826	71.7728	chr2-133034190-133034662	GGGCGTGGGCAACAAAG	negatives	0.442293	0.403188
MACS_peak_1744	chr2	150623445	150623945	100	chr2	150623577	150623812	100	chr2-150623150-150624087	ATAAGGGCTTTGGATGC	negatives	0.0940827	0.871905
MACS_peak_1750	chr2	151768507	151769007	89.4	chr2	151768665	151768848	100	chr2-151768560-151769432	TGGCCGTGCGATGAGAC	negatives	0.229914	0.60956
MACS_peak_1751	chr2	152261596	152262096	66	chr2	152261687	152262004	75.3943	chr2-152261400-152261926	TACGGAAATCGGTGCGG	negatives	0.200702	0.8054
MACS_peak_1752	chr2	153524741	153525241	98.2	chr2	153524901	153525081	100	chr2-153524427-153525232	GTTGGGGAACTGCGAGT	negatives	0.249427	0.5869
MACS_peak_1755	chr2	156679231	156679731	100	chr2	156679401	156679560	100	chr2-156679123-156679866	GGACGCCTACGAGAATA	negatives	-0.0598685	0.895625
MACS_peak_1799	chr2	179886706	179887206	82.4	chr2	179886774	179887138	94.5055	chr2-179886794-179887722	GTCCGACCCAGTTTATG	negatives	-0.135894	0.808632
MACS_peak_1815	chr2	189873503	189874003	92.2	chr2	189873614	189873891	100	chr2-189873306-189873964	GGTAGTCAGGGGAGCTG	negatives	0.152932	0.61906
MACS_peak_1889	chr2	232319978	232320478	100	chr2	232320098	232320357	100	chr2-232319852-232320523	CCAAGCTGAGTGCTTAG	negatives	-0.228995	0.620248
MACS_peak_1907	chr20	15654121	15654621	84.6	chr20	15654275	15654467	100	chr20-15654198-15654817	TGGTGGCGGACGGTGGT;GCCAAGTAGGCAAACTG	negatives	0.00404631	0.406776
MACS_peak_1919	chr20	24068159	24068659	64.6	chr20	24068309	24068509	86.5	chr20-24068336-24068858	TCGGCTAGCATAGTCGG;TATTGGGGGGGGGTCTG	negatives	-0.401803	0.178824
MACS_peak_1900	chr20	7539545	7540045	63	chr20	7539669	7539920	75.6972	chr20-7539730-7540490	CGACGTGGAAAGACGGT;TCCAACTCTGCCATTAG	negatives	0.0667044	0.740839
MACS_peak_1918	chr20	23360199	23360699	62	chr20	23360334	23360563	76.4192	chr20-23360020-23360509	TGAGATGCGAGTGAGGG	negatives	0.402875	0.647466
MACS_peak_1925	chr20	29648038	29648538	64	chr20	29647999	29648576	62.0451	chr20-29648218-29648932	CAGGCGGAAATGTTTTT	negatives	-0.577932	0.0636803
MACS_peak_1938	chr20	42315374	42315874	100	chr20	42315512	42315736	100	chr20-42315311-42315974	CCGTTGTTTGTATGGAA	negatives	0.0558803	0.943422
MACS_peak_1962	chr20	54196293	54196793	100	chr20	54196422	54196663	100	chr20-54196285-54197042	AATGAAGCTTTTGGAAG	negatives	0.216326	0.804723
MACS_peak_2007	chr22	29190768	29191618	74.8235	chr22	29190720	29191665	67.3016	chr22-29190831-29191467	ACAAGTCTGGGTGTCTG;GTTTAGTTGGCCACGGC	negatives	0.0935353	0.885914
MACS_peak_2017	chr22	34731284	34731784	96	chr22	34731438	34731630	100	chr22-34731304-34732230	GTAGAAGGGACGAAGCG	negatives	0.176799	0.611028
MACS_peak_431967	chr22	33193061	33193561	95	.	0	0	0	chr22-33193086-33193770	CTGGCAGTGCCGGTTGC	negatives	0.463969	0.137805
MACS_peak_498638	chr3	195315147	195315647	66.4	.	0	0	0	chr3-195314926-195315479	GGGGCGGATGAGGGCAG;AGCATCAGTATGCCGCT	negatives	-0.511366	0.104707
MACS_peak_2084	chr3	22785232	22785732	84	chr3	22785336	22785627	100	chr3-22785070-22785652	GGTAACGAGGGAACGGG;CACAGCTAGAGCGACGG	negatives	0.0402492	0.96122
MACS_peak_2119	chr3	63020671	63021171	89.2	chr3	63020720	63021121	99.0025	chr3-63020473-63021117	GTAAGTTTAGCCAAACG;CTGAATGATCAAGTCCC	negatives	0.0720327	0.769435
MACS_peak_2041	chr3	1114772	1115272	60.2	chr3	1114880	1115164	67.9577	chr3-1114533-1115073	AGGTGTAAGTGGGGTGA;GTCCTCATCTTGAGGGG	negatives	-0.13754	0.921018
MACS_peak_2122	chr3	64770603	64771403	68.75	chr3	64770575	64771431	67.5234	chr3-64770853-64771672	GTGTGGGCGAACGTGTG;GTTAGTCGCCCAAGGTG	negatives	-0.103373	0.277253
MACS_peak_2241	chr3	184536187	184536687	69.4	chr3	184536315	184536558	89.7119	chr3-184536340-184536834	TAGGAAGGGATACGGTC;TCGTAGGTAAGGGGCCG	negatives	-0.107311	0.938638
MACS_peak_2068	chr3	14526224	14526724	96.8	chr3	14526358	14526589	100	chr3-14526240-14526792	CGGGACGCGTAGTCGGT;TCGTATGGGAGAACGAG	negatives	-0.159964	0.775378
MACS_peak_2101	chr3	32448581	32449081	61.4	chr3	32448606	32449055	62.5835	chr3-32448774-32449315	TGGGCGAGTCGGAGGGG;TGGCATCATGGACCCAG	negatives	-0.302276	0.696193
MACS_peak_2046	chr3	3326331	3326831	74.2	chr3	3326493	3326668	100	chr3-3326130-3326702	TGAGGGGGGGTGGGGCG	negatives	-0.469019	0.370081
MACS_peak_2088	chr3	24908002	24908502	100	chr3	24908112	24908391	100	chr3-24907869-24908886	CATATGTTCCTGCTGTA	negatives	0.521043	0.453489
MACS_peak_2102	chr3	33110114	33110614	60.2	chr3	33110233	33110495	69.4656	chr3-33110313-33110911	ATCCGTTGGAGGATCTT	negatives	-0.204052	0.605483
MACS_peak_2129	chr3	73989190	73989690	60.4	chr3	73989325	73989555	72.6087	chr3-73989049-73989492	CTCACGTGCAAGTCCAA	negatives	-0.0200521	0.970176
MACS_peak_2141	chr3	80399084	80399584	67.6	chr3	80399235	80399432	94.9239	chr3-80398915-80399422	GTGAAATGCCCTGATTT	negatives	0.110754	0.920861
MACS_peak_2142	chr3	80750966	80751466	87.8	chr3	80751049	80751382	100	chr3-80751027-80751630	GTAGGTGCAAGCGTCGT	negatives	0.528605	0.521568
MACS_peak_2156	chr3	87626702	87627202	100	chr3	87626850	87627053	100	chr3-87626605-87627203	CTCAACCTCTGATAGGG	negatives	-0.0582036	0.913145
MACS_peak_2165	chr3	96271446	96271946	86.4	chr3	96271571	96271821	100	chr3-96271106-96271878	ATGATTCCAGCTAGGGG	negatives	0.391818	0.407211
MACS_peak_2167	chr3	96654573	96655073	64.4	chr3	96654736	96654909	91.3295	chr3-96654751-96655490	TGCAGGGGTGTCAACTG	negatives	-0.132996	0.794872
MACS_peak_2182	chr3	114152303	114152803	100	chr3	114152465	114152640	100	chr3-114152252-114152850	TAGGTTCATTTTATGGT	negatives	0.381049	0.34695
MACS_peak_2224	chr3	161062527	161063027	82	chr3	161062551	161063002	85.3659	chr3-161062617-161063254	AGGACCCCTCGTCAGGT	negatives	0.0399649	0.950233
MACS_peak_2225	chr3	161063541	161064091	70.3636	chr3	161063504	161064127	67.8973	chr3-161063704-161064280	GAGCGAGTCGTGCCGGC	negatives	0.053915	0.934003
MACS_peak_2249	chr3	192031386	192031886	85.8	chr3	192031518	192031754	100	chr3-192031232-192031815	GGTGAAGGTTCAGCGGG	negatives	-0.243669	0.419205
MACS_peak_2359	chr4	101317950	101318450	74	chr4	101318082	101318317	100	chr4-101318080-101318688	TTCCGGCCCGTGCACGG;AGATGCGACAGAGCAGG	negatives	-0.621559	0.0609019
MACS_peak_2367	chr4	106608005	106608505	69.4	chr4	106608167	106608342	100	chr4-106607853-106608352	CAGTACGGCCCGACGTT;ATCGGCTTTGAGCTTTG	negatives	0.284896	0.867369
MACS_peak_2431	chr4	176074201	176074701	71.8	chr4	176074339	176074563	98.6607	chr4-176073832-176074560	CGGGGGCCGGGGTTTAG;GCAAGGCGTGGTAGTCC	negatives	-0.206503	0.141838
MACS_peak_2398	chr4	140281429	140281929	84	chr4	140281539	140281818	100	chr4-140281329-140281849	TCATTAGGGCTCGTACG;TACGGGCCGGTGTCGCT	negatives	0.396675	0.128885
MACS_peak_2278	chr4	10093891	10094391	61.6	chr4	10094009	10094272	71.8631	chr4-10094083-10094551	AGGTGTTTGTAGGGGTC;TTGCGTGAGGGCACATC	negatives	0.152492	0.812381
MACS_peak_2280	chr4	12859459	12859959	100	chr4	12859609	12859809	100	chr4-12859200-12860005	GGAGATGCCAGCCGGGC	negatives	-0.246633	0.514694
MACS_peak_2282	chr4	15002685	15003185	70.2	chr4	15002775	15003094	81.5047	chr4-15002834-15003319	GCCAAACTTTAACGACT	negatives	-0.197295	0.726274
MACS_peak_2316	chr4	57325689	57326189	67.6	chr4	57325820	57326057	86.9198	chr4-57325851-57326378	TGGCTATGGGTTTAGTA	negatives	0.418507	0.50532
MACS_peak_2325	chr4	68956092	68956592	79	chr4	68956231	68956453	100	chr4-68956197-68956845	GATGCAGCAGAGACTGA	negatives	0.425171	0.247503
MACS_peak_2328	chr4	71698699	71699199	89.8	chr4	71698879	71699019	100	chr4-71698750-71699331	GCCCGACCGCCCCTGTC	negatives	-0.0144139	0.98461
MACS_peak_2337	chr4	79465794	79466294	74.8	chr4	79465971	79466116	100	chr4-79465393-79466168	CGTCCTTAATTCGTGGT	negatives	0.344907	0.475091
MACS_peak_2339	chr4	80680236	80680736	93.4	chr4	80680365	80680606	100	chr4-80679809-80680703	GGAAAGGCGTAGTGCGG	negatives	0.11095	0.882537
MACS_peak_2345	chr4	84479172	84479672	80.8	chr4	84479330	84479513	100	chr4-84479016-84479576	GATAGTATTCTGGTCCC	negatives	-0.286987	0.506359
MACS_peak_2358	chr4	101021853	101022353	66.6	chr4	101022023	101022183	100	chr4-101021649-101022186	AAGGCGCAAATTGCCTT	negatives	0.376869	0.504321
MACS_peak_2374	chr4	114623971	114624471	68.8	chr4	114624095	114624346	87.251	chr4-114624127-114624843	GACTCACGCATCTATCT	negatives	0.0501954	0.899518
MACS_peak_2383	chr4	121153311	121153811	92.4	chr4	121153465	121153657	100	chr4-121153083-121153773	TGGGGTCGCAGCCCGGG	negatives	-0.289876	0.737986
MACS_peak_2394	chr4	133707490	133707990	100	chr4	133707642	133707838	100	chr4-133707489-133708203	GCGGAAGAGGTTGGACC	negatives	-0.382496	0.573738
MACS_peak_2404	chr4	148444967	148445467	66.4	chr4	148445115	148445318	90.6404	chr4-148444654-148445299	ATAATCGCTTGAGACGC	negatives	-0.140242	0.850825
MACS_peak_2420	chr4	166747517	166748017	65	chr4	166747678	166747855	92.6554	chr4-166747304-166747842	TCAGGGGTGCTATGGGG	negatives	-0.075478	0.914977
MACS_peak_2427	chr4	170565572	170566072	100	chr4	170565738	170565906	100	chr4-170565362-170566136	GTGGAATCGGAGAGTGT	negatives	-0.954025	0.0778556
MACS_peak_2691	.	-1	-1	0	chr5	107613951	107614156	85.8537	chr5-107613441-107614127	CGGATGGGCTGATGCGA;AAATGTCACGTCCCGAT	negatives	-0.0790967	0.990633
MACS_peak_2518	chr5	42744519	42745019	84.8	chr5	42744586	42744951	97.8082	chr5-42744395-42744943	CCAATGGTATCTCGGAG;CCTTAAAGCAAGAAGCG	negatives	-0.315687	0.118478
MACS_peak_2498	chr5	41176961	41177461	91.4	chr5	41177080	41177341	100	chr5-41176700-41177418	GGGTTTCTGGGTGTCGG;CCTTATATCGAGTGCAG	negatives	-0.0568715	0.129392
MACS_peak_2524	chr5	42963499	42963999	98.2	chr5	42963547	42963951	100	chr5-42963508-42964057	TGGCGAATAGCCTGCCT;CGCACTTAAACCTCACA	negatives	0.402146	0.368628
MACS_peak_2476	chr5	39671098	39671598	99.6	chr5	39671270	39671426	100	chr5-39671100-39671678	GGGTGGCTTGCGGTCCG;CTACCCATGTCGGGCGG	negatives	-0.281269	0.68704
MACS_peak_2678	chr5	102530515	102531015	96.2	chr5	102530664	102530866	100	chr5-102530455-102530996	TAAAGCACGATAGATAT;GTAGGTGGGCCGAGGGG	negatives	0.123069	0.930616
MACS_peak_2669	chr5	100056675	100057175	83.8	chr5	100056835	100057014	100	chr5-100056388-100057094	GGGCGAAGTGGGTCCAA;TCGCGTACGCATGCGCC	negatives	0.206513	0.734911
MACS_peak_2452	chr5	20194284	20194784	68.6	chr5	20194405	20194662	86.3813	chr5-20193968-20194627	CTGCTGATAATCAAAGG	negatives	0.211782	0.682902
MACS_peak_2453	chr5	22250856	22251356	82.4	chr5	22250989	22251223	100	chr5-22250944-22251512	GTGTCATAGCGTGTCGC	negatives	0.409374	0.258724
MACS_peak_2460	chr5	24992779	24993279	82.6	chr5	24992899	24993158	100	chr5-24992676-24993192	GTTCCAGTGCTCTAGGG	negatives	-0.0365447	0.952169
MACS_peak_2477	chr5	39831172	39831672	84.4	chr5	39831311	39831532	100	chr5-39831250-39831737	GGCTGGCGTGGTTGGGC	negatives	-0.490013	0.151724
MACS_peak_2488	chr5	40577776	40578276	70.2	chr5	40577852	40578199	79.2507	chr5-40577537-40578127	CAGGAGGTCGTGGGTGA	negatives	0.332953	0.573012
MACS_peak_2492	chr5	40834350	40834850	81.8	chr5	40834459	40834741	100	chr5-40833871-40834759	ACTTATATCAGGAAGCT	negatives	0.0353752	0.946443
MACS_peak_2495	chr5	41101984	41102484	100	chr5	41102121	41102346	100	chr5-41101938-41102535	GGAGGGACGGGTATAAG	negatives	-0.177121	0.74769
MACS_peak_2506	chr5	41804919	41805419	96.4	chr5	41805093	41805245	100	chr5-41804866-41805401	CCGGGTGAGCGAGGGGC	negatives	0.446412	0.210429
MACS_peak_2507	chr5	42094655	42095155	82.2	chr5	42094813	42094997	100	chr5-42094368-42095066	CCGGGAGGGTGATAACC	negatives	-0.145	0.89039
MACS_peak_2521	chr5	42838828	42839328	68.6	chr5	42838905	42839251	76.8786	chr5-42838985-42839563	GATGCTGGGGGAGGGGC	negatives	0.342848	0.198279
MACS_peak_2526	chr5	43080657	43081157	75.2	chr5	43080724	43081089	84.3836	chr5-43080781-43081265	GGTGCCCGTGGCCGCTT	negatives	0.249585	0.731057
MACS_peak_2528	chr5	43164497	43164997	61.2	chr5	43164610	43164883	70.696	chr5-43164377-43164803	TGTACAGCAACCTTCGT	negatives	0.161733	0.651308
MACS_peak_2564	chr5	45209348	45209848	86	chr5	45209413	45209783	98.6486	chr5-45209418-45210006	ACGGGTGGAGTTGGGTG	negatives	-0.323379	0.380891
MACS_peak_2574	chr5	45727401	45727901	86.4	chr5	45727550	45727752	100	chr5-45727469-45728110	GCTGGCTGATAGGTGGG	negatives	-0.304251	0.44232
MACS_peak_2576	chr5	45878229	45878729	85.2	chr5	45878331	45878626	100	chr5-45878303-45878948	AGTCCAGATGTGGAGCG	negatives	-0.861269	0.0833515
MACS_peak_2579	chr5	46160581	46161081	100	chr5	46160708	46160954	100	chr5-46160307-46161172	GTAAAGGTTCGTGGCCG	negatives	0.149001	0.760508
MACS_peak_2591	chr5	55280456	55280956	70.8	chr5	55280590	55280822	94.8276	chr5-55280337-55280810	CCTGGGTTGACGAGGGT	negatives	-0.547499	0.0693
MACS_peak_2603	chr5	62961028	62961528	100	chr5	62961187	62961368	100	chr5-62960963-62961681	TAAGTACGGTATAGAGG	negatives	-0.0959541	0.83572
MACS_peak_2605	chr5	64482189	64482689	99.4	chr5	64482302	64482576	100	chr5-64482192-64482732	AGGGAACTCTGGTAGGG	negatives	0.351465	0.644127
MACS_peak_2614	chr5	72346997	72347497	65	chr5	72347147	72347347	87.5	chr5-72347172-72347698	CCCTGGTCCTGCCCATC	negatives	-0.0485525	0.943946
MACS_peak_2621	chr5	74517758	74518258	60.4	chr5	74517921	74518095	79.8851	chr5-74517956-74518643	GCAATATTGTATTTAGC	negatives	-0.901378	0.0574542
MACS_peak_2633	chr5	81573409	81573909	75.8	chr5	81573503	81573814	91.6399	chr5-81573283-81573788	GGCGCTTGTGTAAAGGG	negatives	0.277165	0.717668
MACS_peak_2636	chr5	82399388	82399888	83.6	chr5	82399488	82399787	100	chr5-82399199-82399806	ATAGGCGACGTGTGGAT	negatives	0.330106	0.520198
MACS_peak_2653	chr5	91374995	91375495	71.6	chr5	91375144	91375345	100	chr5-91375137-91375682	CAAGACCGCGAGACAAG	negatives	0.0183602	0.984781
MACS_peak_2672	chr5	101367155	101367655	96.2	chr5	101367320	101367489	100	chr5-101367174-101367746	ATAGTGCTCTAATGACG	negatives	0.0949577	0.785839
MACS_peak_2676	chr5	102375574	102376074	96.4	chr5	102375717	102375930	100	chr5-102375532-102376056	GTGAGGGGAGTGTGGTG	negatives	-0.451861	0.335574
MACS_peak_2724	chr5	120307310	120307810	100	chr5	120307418	120307701	100	chr5-120307263-120307815	GAAAGGCCAGACTGTCA	negatives	-0.0386171	0.969935
MACS_peak_2727	chr5	123669343	123669843	88.8	chr5	123669494	123669691	100	chr5-123668979-123669787	TTTTGGCGACCGGGGTG	negatives	-0.420838	0.19306
MACS_peak_2734	chr5	128217591	128218091	88.4	chr5	128217708	128217974	100	chr5-128217530-128218033	GGAGTGCTCGTTCACCC	negatives	0.225924	0.639887
MACS_peak_2740	chr5	129616821	129617321	70.6	chr5	129616935	129617206	87.8229	chr5-129616968-129617610	TTGCGTAGTTCAGTTGG	negatives	-0.00669773	0.993767
MACS_peak_2745	chr5	130897603	130898103	75.2	chr5	130897760	130897945	100	chr5-130897435-130897979	AAGGGGTTTGTCGTCTT	negatives	-0.428792	0.439938
MACS_peak_2800	chr5	162954507	162955007	66	chr5	162954642	162954872	84.7826	chr5-162954302-162954837	ATAGAACGGCCGGCTTT	negatives	0.185878	0.829921
MACS_peak_2803	chr5	163675158	163675658	68	chr5	163675318	163675498	100	chr5-163674990-163675498	ACCTATTTTCACCAGTA	negatives	-0.0716359	0.861166
MACS_peak_2818	chr5	176020180	176020680	63	chr5	176020259	176020600	69.2082	chr5-176020021-176020495	AGGGGGGCTCGGCAGTG	negatives	-0.655857	0.0515165
MACS_peak_2829	chr5	180664947	180665447	100	chr5	180665065	180665329	100	chr5-180664929-180665715	TGAGGGGCTAGGAGCTC	negatives	0.283632	0.689533
MACS_peak_609627	chr5	149974853	149975353	70	.	0	0	0	chr5-149975003-149975796	GGGGGCCTGACCGGAAT	negatives	0.25984	0.690929
MACS_peak_2905	chr6	49402066	49402566	66	chr6	49402240	49402392	100	chr6-49402236-49402785	CGGTGGTTGGGGGAAGG;AGTAAAATGCCCCGCCT	negatives	0.12976	0.598549
MACS_peak_3002	chr6	100782074	100782574	100	chr6	100782199	100782449	100	chr6-100781727-100782612	GTACGTGCAACATTGGA;CCGGTTAAGGGGGTCGT	negatives	0.414348	0.197542
MACS_peak_2893	chr6	44218635	44219135	100	chr6	44218763	44219006	100	chr6-44218542-44219210	CGTGCTCATCAACTCTG;GCGGGTGCTTTGCGTGA	negatives	-0.397023	0.085358
MACS_peak_2851	chr6	18361406	18361906	94.4	chr6	18361545	18361767	100	chr6-18361328-18361878	TGAGGGTGTTTGGGAGG	negatives	-0.725287	0.112595
MACS_peak_2861	chr6	30261521	30262021	67.2	chr6	30261607	30261934	76.4526	chr6-30261287-30261857	TCAGCTTGTTCGGCAGG	negatives	0.576841	0.36728
MACS_peak_2862	chr6	30688045	30688545	67.8	chr6	30688149	30688441	80.4795	chr6-30687847-30688384	TAGAGCGGACTGACGGG	negatives	0.563501	0.428891
MACS_peak_2892	chr6	44214647	44215147	100	chr6	44214818	44214975	100	chr6-44214183-44215321	TCTGGTCAGACAAACGC	negatives	0.402412	0.610035
MACS_peak_2910	chr6	52289135	52289635	77	chr6	52289277	52289493	100	chr6-52289250-52289853	GTCTGTAAGCAGCACGA	negatives	-0.5884	0.416968
MACS_peak_2924	chr6	62564330	62564830	86.6	chr6	62564444	62564716	100	chr6-62564397-62565219	GCTTGCTGACCTGCTCT	negatives	0.310604	0.61477
MACS_peak_2930	chr6	65334899	65335399	95.4	chr6	65335031	65335267	100	chr6-65334922-65335856	GGAGTGTATTACCCTGT	negatives	-0.124422	0.838465
MACS_peak_2933	chr6	65978944	65979444	96.4	chr6	65979108	65979279	100	chr6-65978962-65979668	TTATTATGGCCGGTAGG	negatives	0.320539	0.203393
MACS_peak_2935	chr6	66580014	66580514	86.8	chr6	66580133	66580394	100	chr6-66579837-66580448	ATGGGCCTAGCGGAAGT	negatives	-0.71868	0.133013
MACS_peak_2941	chr6	70585097	70585597	100	chr6	70585248	70585446	100	chr6-70585089-70585646	GGGCAAGGCTAACGGTT	negatives	-0.386471	0.0615815
MACS_peak_2946	chr6	72415420	72415920	100	chr6	72415557	72415783	100	chr6-72415409-72415988	GTATCGTTACATATTTT	negatives	-0.31893	0.47026
MACS_peak_2960	chr6	79419462	79419962	89.6	chr6	79419639	79419784	100	chr6-79419514-79420363	CCTGCTCAAGCAGGTGA	negatives	0.224752	0.560824
MACS_peak_2963	chr6	80397158	80397658	99	chr6	80397253	80397563	100	chr6-80396790-80397653	GGATAGGCGATGCATGG	negatives	-0.179909	0.64641
MACS_peak_2977	chr6	86320898	86321398	75.6	chr6	86321047	86321248	100	chr6-86321020-86321624	CGGTGGGTTTGGGGGTG	negatives	0.227185	0.384949
MACS_peak_2987	chr6	91370219	91370719	81	chr6	91370406	91370532	100	chr6-91370314-91370818	TCAGAGTGGCATTGGGG	negatives	0.411632	0.234313
MACS_peak_3000	chr6	100284304	100284804	82.4	chr6	100284414	100284694	100	chr6-100284170-100284716	GATTCCTAGGGAATAAA	negatives	0.176643	0.734726
MACS_peak_3001	chr6	100415689	100416189	100	chr6	100415785	100416093	100	chr6-100415449-100416209	GACCCCGGATCACGACC	negatives	0.206821	0.659713
MACS_peak_3005	chr6	101953055	101953555	95.6	chr6	101953205	101953404	100	chr6-101952994-101953533	TGGGCAACTACCGCAGT	negatives	0.501455	0.179776
MACS_peak_3008	chr6	102501090	102501590	70.4	chr6	102501169	102501511	79.8246	chr6-102500895-102501442	AAGCGGACCCCCGGGGC	negatives	0.157639	0.721926
MACS_peak_3027	chr6	118792516	118793016	92	chr6	118792644	118792887	100	chr6-118792236-118792976	TGCTACGAGGTGGGGAG	negatives	0.341454	0.536067
MACS_peak_3030	chr6	119558325	119558825	91.6	chr6	119558402	119558748	100	chr6-119558367-119559190	TGCGGGGTGGGGAACGT	negatives	-0.33632	0.175396
MACS_peak_3045	chr6	127959699	127960199	94.2	chr6	127959814	127960084	100	chr6-127959728-127960278	TCGGCGAGAGGTCATCG	negatives	0.41403	0.130079
MACS_peak_3050	chr6	133886045	133886545	100	chr6	133886200	133886390	100	chr6-133885910-133886636	ACGTAGGCTGTGCTGGG	negatives	0.483495	0.194238
MACS_peak_3054	chr6	137693638	137694138	100	chr6	137693799	137693976	100	chr6-137693586-137694455	TCGTTAGAACCCGAATT	negatives	0.315659	0.559467
MACS_peak_3112	chr7	26236332	26236832	100	chr7	26235984	26236319	12.8358	chr7-26236276-26236963	AAATCCCAACCGTTCTA;ATGAGATAAAGCTCTGA	negatives	0.134166	0.918166
MACS_peak_3207	chr7	133641584	133642084	100	chr7	133641749	133641918	100	chr7-133641261-133642086	GGGTAGCTGGGGGGGAG;CCCGGCGGGCCGTACAA	negatives	-0.465957	0.125907
MACS_peak_3082	chr7	2191950	2192450	100	chr7	2192142	2192258	100	chr7-2191927-2192730	GAGCGTTCGGCGGGGGT;GTGAGTTCAGGGGCGGG	negatives	0.0939071	0.881473
MACS_peak_3189	chr7	110237717	110238217	78	chr7	110237839	110238095	100	chr7-110237608-110238107	TCTTGCTGACACACTGG;GTTGTGCCGCCATGGAA	negatives	0.25571	0.764932
MACS_peak_3144	chr7	69249071	69249571	88.2	chr7	69249151	69249490	100	chr7-69249130-69249733	TGGTGTGTGGGGTAGGG;GTTTACGCTGCTTAGTG	negatives	-0.0805603	0.985134
MACS_peak_3108	chr7	26231500	26232250	82.2667	chr7	26231463	26232287	77.0631	chr7-26231633-26232268	CCATGTATGCGGCCACT;TGGTGTGTGGCTAGGCG	negatives	0.543146	0.453541
MACS_peak_3215	chr7	137077135	137077635	66.6	chr7	137077255	137077514	81.8533	chr7-137077302-137077801	GCGGACTATGCGATATG;TGGTTAATTATCGACCG	negatives	0.114213	0.929528
MACS_peak_3116	chr7	28461650	28462150	63.8	chr7	28461825	28461975	96	chr7-28461449-28461969	CCTAGTCAGAGGGCGAG;TTCCGCTAATAAATGAC	negatives	0.130457	0.95948
MACS_peak_3114	chr7	26237062	26237562	100	chr7	26236933	26237109	100	chr7-26236872-26237783	CGCGGGGTGATGATAGA	negatives	0.292146	0.372249
MACS_peak_3120	chr7	33237902	33238402	90.6	chr7	33237976	33238327	100	chr7-33237949-33238525	TTGCCCGTGAGACAGAA	negatives	0.169312	0.701572
MACS_peak_3152	chr7	75692638	75693138	100	chr7	75692830	75692946	100	chr7-75692592-75693407	GTAAGGCTCGTCTTCCG	negatives	0.294837	0.514491
MACS_peak_3163	chr7	83763947	83764447	100	chr7	83764106	83764288	100	chr7-83763813-83764875	CCCGAGGATACCTAATA	negatives	-0.632871	0.0903513
MACS_peak_3177	chr7	99691636	99692136	99.6	chr7	99691774	99691997	100	chr7-99691638-99692519	GTTTTTGCATGACTTGG	negatives	0.0232207	0.970082
MACS_peak_3200	chr7	126447088	126447588	100	chr7	126447217	126447458	100	chr7-126446877-126447715	GTAGGGGTTCTCAGAAC	negatives	-0.342741	0.573142
MACS_peak_3213	chr7	135453414	135453914	68	chr7	135453532	135453795	84.0304	chr7-135453574-135454283	GTGTTACTTGCCTTAGT	negatives	0.308527	0.221203
MACS_peak_3214	chr7	136912341	136912841	66.6	chr7	136912493	136912689	92.3469	chr7-136912112-136912674	AGAAGTTGATCGTAGGA	negatives	0.401642	0.360761
MACS_peak_3249	chr7	152879785	152880285	61.6	chr7	152879912	152880158	73.5772	chr7-152879390-152880093	GGGGCTGCCTTTTCATC	negatives	0.549607	0.244139
MACS_peak_3320	.	-1	-1	0	chr8	87812620	87812796	100	chr8-87812349-87812938	GAAGGGAGGGTCGGGGG;GGTGGCTCGCTGCCGAC	negatives	0.170367	0.339632
MACS_peak_3324	chr8	90614531	90615031	68	chr8	90614578	90614984	72.1675	chr8-90614375-90614871	GGTCTAGGGGGATGTCG;TGGGGGTTGTTCATCTA	negatives	-0.0419551	0.0682856
MACS_peak_3259	chr8	1029873	1030373	69.8	chr8	1029963	1030282	81.1912	chr8-1029576-1030222	GTTCTTCTTGCGCGGGT	negatives	0.0347116	0.961827
MACS_peak_3272	chr8	12766081	12766581	100	chr8	12766206	12766456	100	chr8-12765984-12766637	TGCAGGAACGTACTATA	negatives	0.0364703	0.93826
MACS_peak_3278	chr8	17476901	17477401	83.6	chr8	17476987	17477314	100	chr8-17476983-17477484	GGGATTTGGGGGCGCGG	negatives	-0.278993	0.42791
MACS_peak_3292	chr8	31333996	31334496	60.2	chr8	31334184	31334307	91.8699	chr8-31333381-31334297	AGTCCCACCTAGTTTCG	negatives	0.267741	0.472438
MACS_peak_3307	chr8	59509298	59509798	91	chr8	59509427	59509669	100	chr8-59509099-59509753	GATTGCTGGGCCAGGCG	negatives	-0.647103	0.173723
MACS_peak_3360	chr8	110830474	110830974	61.2	chr8	110830593	110830854	71.6475	chr8-110830198-110830780	CTTACTCCTGGATAAGG	negatives	0.238046	0.691898
MACS_peak_3377	chr8	113780650	113781150	63.2	chr8	113780767	113781033	74.812	chr8-113780834-113781372	GCGGGGAAGTACCGGGG	negatives	0.023646	0.959963
MACS_peak_3392	chr8	120257319	120257819	92.8	chr8	120257295	120257843	89.0511	chr8-120256966-120257783	TGGTAATATTGGTCCGA	negatives	0.204352	0.638401
MACS_peak_3395	chr8	121773459	121773959	100	chr8	121773565	121773853	100	chr8-121773442-121773985	GACTCAGTGGTCTACAG	negatives	-0.573884	0.126201
MACS_peak_3397	chr8	122391200	122391700	92.6	chr8	122391347	122391552	100	chr8-122391053-122391663	GTGGGGCCGTGTGCAGT	negatives	-0.134114	0.692719
MACS_peak_3410	chr8	127526181	127526681	87.8	chr8	127526255	127526606	100	chr8-127526242-127526766	CGGTGGAGGGGGCGTAG	negatives	-0.543531	0.0739527
MACS_peak_3417	chr8	131809812	131810312	67.6	chr8	131809930	131810194	83.3333	chr8-131809974-131810577	TTCTGGAACGCTGGGCT	negatives	0.286875	0.516364
MACS_peak_3435	chr8	143966542	143967042	87	chr8	143966677	143966906	100	chr8-143966607-143967234	GAGGGTGTCACAAGGTC	negatives	0.201195	0.670671
MACS_peak_3513	chr9	109015001	109015501	82	chr9	109015164	109015338	100	chr9-109014740-109015411	GATGGGGGGGGGAGATG;CATTTTACGCCAGGGGT	negatives	-0.213077	0.612269
MACS_peak_3531	chr9	115535303	115535803	69.4	chr9	115535435	115535671	91.1017	chr9-115535456-115536059	GACATCCCACAGTGTCC;GAGCGTAGATTGTTATG	negatives	-0.131587	0.823238
MACS_peak_3487	chr9	94204066	94204566	61.2	chr9	94204188	94204443	71.7647	chr9-94204260-94204743	CATAGGCGGACATCTGG;GTCATCGCGTGGTTTGG	negatives	0.135774	0.440909
MACS_peak_3470	chr9	79831819	79832319	61.6	chr9	79831916	79832221	68.8525	chr9-79832011-79832647	GGCTGTTATTAATAGGA;TGTTGTGCCAGGGTTCG	negatives	0.113787	0.336192
MACS_peak_3455	chr9	19378592	19379092	99.2	chr9	19378691	19378992	100	chr9-19378549-19379088	AGGGCGGGGCACACAGT	negatives	0.162039	0.788028
MACS_peak_3467	chr9	78314974	78315474	96.4	chr9	78315098	78315350	100	chr9-78314992-78315846	GCGGGGCCCGGGATGTG	negatives	-0.165839	0.753527
MACS_peak_3468	chr9	78789920	78790420	98.4	chr9	78790030	78790309	100	chr9-78789864-78790412	GAAAGGGGTGGGGCCGG	negatives	-0.336611	0.397642
MACS_peak_3497	chr9	99235973	99236473	95.4	chr9	99236125	99236320	100	chr9-99235730-99236450	GTACCAAGGGACCTAGG	negatives	0.211255	0.681288
MACS_peak_3505	chr9	102842029	102842529	62.4	chr9	102842171	102842387	78.7037	chr9-102842217-102843159	TGTGGTCGTTGCGGGAG	negatives	-0.374257	0.52719
MACS_peak_3525	chr9	111792446	111792946	64.4	chr9	111792579	111792813	80.7692	chr9-111792624-111793233	TCGACGTTTGGAATGGG	negatives	0.0915075	0.900238
MACS_peak_3528	chr9	114089055	114089555	70.8	chr9	114089190	114089419	95.1965	chr9-114089201-114090083	TTGACTTAGACCGAGAC	negatives	0.332496	0.719803
MACS_peak_3546	chr9	123900902	123901402	100	chr9	123901046	123901257	100	chr9-123900870-123901452	CGAGGTGCAGCGTCATG	negatives	0.508477	0.275416
MACS_peak_3558	chr9	133761445	133761945	65.4	chr9	133761454	133761935	65.9044	chr9-133761618-133762072	GTGCAATAGCTCGGAAT	negatives	-0.597276	0.15886
MACS_peak_3581	chrX	11960899	11961399	95	chrX	11961056	11961242	100	chrX-11960827-11961374	ACTGGGGCGTCGAGGTG	negatives	-0.407199	0.211237
MACS_peak_3584	chrX	16862719	16863219	89.2	chrX	16862710	16863228	87.8378	chrX-16862605-16863165	GTGGTGGCTCCAGGAGG	negatives	0.167542	0.592828
MACS_peak_3591	chrX	28867658	28868158	62.8	chrX	28867812	28868004	83.3333	chrX-28867103-28867972	ATCGCCCTCTGGGCCGT	negatives	0.326324	0.447707
MACS_peak_3623	chrX	138130524	138131024	67	chrX	138130673	138130875	92.0792	chrX-138130689-138131460	ACATATATTACAGGTGT	negatives	0.0668155	0.875484
MACS_peak_189	chr1	182612820	182613320	91.2	chr1	182612817	182613323	90.7115	chr1-182612864-182613381	GCTGGTTCGTTTGTCAA;CTGGGGTCCAGAGTATG	positives	1.71735	5.56179e-09
MACS_peak_161	chr1	168960922	168961422	94.8	chr1	168961030	168961314	100	chr1-168960855-168961396	AGGGAGCTAAGCGATGT;GCGGTCGGGGGAGGCAC	positives	2.01782	3.82941e-19
MACS_peak_113	chr1	113229945	113230445	78.6	chr1	113229965	113230424	81.0458	chr1-113230052-113230936	GAACGTAGCGGCGAGAG	positives	3.49891	3.23937e-29
MACS_peak_115	chr1	113305606	113306106	90.2	chr1	113305588	113306123	87.6636	chr1-113305573-113306057	GGTTTTCCCTCCCAAGT	positives	2.80945	1.81272e-18
MACS_peak_116	chr1	114878864	114879364	87.4	chr1	114878869	114879358	88.1391	chr1-114878927-114879415	GGGATGTGTGAAATGGT	positives	3.63709	2.78847e-28
MACS_peak_125	chr1	144010465	144011165	90	chr1	144010426	144011203	85.9717	chr1-144010535-144011505	GTGTCCAGCATGAGTTG	positives	3.88802	1.08312e-35
MACS_peak_180	chr1	180485108	180485708	98.6667	chr1	180485058	180485758	86.8571	chr1-180485116-180485724	TAGATACGTGAGCTACA	positives	3.04789	2.9331e-19
MACS_peak_182	chr1	180827781	180828281	75.2	chr1	180827775	180828287	74.6094	chr1-180827622-180828157	GGTGGTGGCGTGGTTAG	positives	2.19452	3.12578e-19
MACS_peak_184	chr1	181068666	181069166	70.2	chr1	181068703	181069129	73.7089	chr1-181068815-181069211	GTAGTAGGTTCGGAGGC	positives	3.87825	1.65107e-26
MACS_peak_185	chr1	181103754	181104854	74.8182	chr1	181103720	181104888	73.3733	chr1-181104031-181104916	GAGACGGGTGGGTGGTC	positives	2.64137	5.88761e-08
MACS_peak_188	chr1	181490753	181491403	84.7692	chr1	181490716	181491440	81.2155	chr1-181490852-181491626	CATGCCTCTTAGCGGGC	positives	3.7822	1.16077e-30
MACS_peak_191	chr1	182730332	182731082	65.7333	chr1	182730292	182731122	59.3976	chr1-182730566-182731059	GCCCATGGACTCGAGGG	positives	3.8856	2.71251e-26
MACS_peak_200	.	-1	-1	0	chr1	187377313	187377922	80.1314	chr1-187377434-187378277	TAGATCTATTATGGAGA	positives	3.6351	3.36704e-17
MACS_peak_202	chr1	187607817	187608317	80.6	chr1	187607931	187608202	100	chr1-187607462-187608220	GTGTTTTCGGGGTCGGA	positives	2.88143	1.59756e-08
MACS_peak_239	chr1	199918058	199918658	77.5	chr1	199918008	199918707	73.6767	chr1-199917907-199918523	TCGTGGGGTACGTGTTG	positives	2.93086	4.44772e-10
MACS_peak_245	chr1	202025648	202026298	100	chr1	202025621	202026325	96.4489	chr1-202025646-202026330	GGATTGGTAGGGCCTGA	positives	3.46224	3.28596e-27
MACS_peak_246	chr1	202206175	202206675	100	chr1	202206191	202206659	100	chr1-202206083-202206712	GTGCCGATTAGGATGCC	positives	2.70063	4.03322e-15
MACS_peak_250	chr1	204493958	204494608	86.6154	chr1	204493913	204494653	76.0811	chr1-204493969-204494532	TTGATAATCAGGGTCGC	positives	4.76818	1.68534e-45
MACS_peak_260	chr1	212769678	212770178	100	chr1	212769734	212770121	100	chr1-212769533-212770178	AGTTCGGGTCTTACCGT	positives	2.3754	2.07784e-06
MACS_peak_261	chr1	214612749	214613249	100	chr1	214612789	214613208	100	chr1-214612621-214613267	TACAGCAGGGAGGTGAG	positives	4.30565	7.27871e-35
MACS_peak_271	chr1	218774247	218774747	73.4	chr1	218774207	218774787	70.1724	chr1-218774380-218775043	GCTCTCGATTGTCCAGC	positives	3.137	3.03378e-11
MACS_peak_278	chr1	222978986	222979486	98.2	chr1	222979110	222979362	100	chr1-222978757-222979477	CTCTCGCTTATGTCGGT	positives	3.7496	2.79258e-22
MACS_peak_284	chr1	230763447	230763947	79.8	chr1	230763586	230763808	100	chr1-230763548-230764126	CGAGTGGAATCGGGGGG	positives	3.37031	3.73014e-17
MACS_peak_287	chr1	235838296	235838796	100	chr1	235838365	235838726	100	chr1-235838278-235838877	AGATCCGGCGCAGACGC	positives	2.4598	1.67871e-06
MACS_peak_45	chr1	42998725	42999225	80.2	chr1	42998687	42999262	76.1739	chr1-42998824-42999420	TCCGTCGGAGCCGACAC	positives	3.58146	1.19941e-24
MACS_peak_47	chr1	43618376	43618876	100	chr1	43618498	43618754	100	chr1-43618374-43618893	TCGTTGGCAGTAAATGC	positives	2.93496	1.80772e-18
MACS_peak_74	chr1	68151842	68152692	71.8824	chr1	68151802	68152732	66.7742	chr1-68152081-68152702	CCATGGTTTCACTCGTT	positives	3.06101	1.84115e-13
MACS_peak_77	chr1	69520908	69521408	100	chr1	69520913	69521403	100	chr1-69520858-69521580	GGCGCCCGGGGACAAGG	positives	3.74209	2.0447e-22
MACS_peak_95	chr1	100895878	100896378	90.6	chr1	100895934	100896321	100	chr1-100895826-100896331	CTACCGCATATATCGAT	positives	3.26459	2.58641e-19
MACS_peak_98	chr1	107031706	107032256	91.4545	chr1	107031664	107032297	85.94	chr1-107031753-107032580	CCTCTGCCGTGCGGCCG	positives	3.39356	5.05518e-28
MACS_peak_420	chr10	125298329	125298829	100	chr10	125298400	125298758	100	chr10-125298228-125298861	GCAGATGGGTGTGTGTG;GTTCCTATTGCAGTGAC	positives	3.7475	9.75511e-58
MACS_peak_419	chr10	121084544	121085044	96.8	chr10	121084580	121085008	100	chr10-121084156-121085028	TTAAGGGGGCCAGATGT;TTCTTAGTTGAAAGTTT	positives	2.63996	3.29465e-28
MACS_peak_427	chr10	132892896	132893396	84.4	chr10	132892978	132893313	100	chr10-132892830-132893318	AGCCTGGCGCGCGATAT;TTGGGTCTCCGTGCACG	positives	2.11618	3.22731e-08
MACS_peak_316	chr10	13800177	13800677	82.8	chr10	13800235	13800618	92.6893	chr10-13800263-13800831	ACAGTGTGATTCGAGGT	positives	4.32613	5.1753e-42
MACS_peak_340	chr10	29258713	29259213	100	chr10	29258824	29259102	100	chr10-29258420-29259221	TGTGGCTTGGTGGCGTT	positives	3.04702	3.70171e-22
MACS_peak_343	chr10	33993273	33993773	93.8	chr10	33993368	33993677	100	chr10-33993304-33993813	TCTGTGTTCCGGGGCGT	positives	4.59329	6.40157e-55
MACS_peak_347	chr10	45933686	45934186	100	chr10	45933684	45934188	100	chr10-45933486-45934323	CATTGAAAGTTTCGATC	positives	3.24334	1.84284e-19
MACS_peak_349	chr10	48342755	48343255	62.8	chr10	48342743	48343267	62.2137	chr10-48342573-48343069	AGGAGATGCACCGCATT	positives	4.15837	4.69425e-21
MACS_peak_362	chr10	62520421	62520921	100	chr10	62520461	62520880	100	chr10-62520215-62520966	GAGGGACACTGCGGAGC	positives	4.80738	4.26863e-42
MACS_peak_382	chr10	86284656	86285156	100	chr10	86284631	86285180	98.5428	chr10-86284639-86285190	GCACTTATACATGTTGC	positives	2.97725	2.1779e-10
MACS_peak_386	chr10	89602796	89603296	68.2	chr10	89602746	89603346	65.1667	chr10-89602955-89603749	GTGGGGAGGCGACCTAA	positives	2.3111	6.98691e-07
MACS_peak_403	chr10	102045672	102046172	88	chr10	102045742	102046101	100	chr10-102045356-102046112	AAAGGTTACATGTTACC	positives	2.9237	5.91507e-11
MACS_peak_412	chr10	114475877	114476377	68.6	chr10	114475967	114476286	78.9969	chr10-114476034-114476571	TAGTCAGTTGGAATCTT	positives	3.40226	1.24271e-14
MACS_peak_423	chr10	129737720	129738520	80.25	chr10	129737684	129738555	75.3157	chr10-129737878-129738534	TTCGGGGTACTGCGAAG	positives	4.64698	1.96112e-34
MACS_peak_428	chr10	133609753	133610253	66.2	chr10	133609823	133610182	72.4234	chr10-133609922-133610391	CAGCTGTCTGGGACCGG	positives	3.55878	5.55622e-15
MACS_peak_449	chr11	4485479	4485979	74.8	chr11	4485505	4485952	77.6286	chr11-4485605-4486148	GGGTTGGCGAGCGACGG;GTGGGGAACCCTGTGGT;CTATCGACGGTGAATGG	positives	3.01068	1.44621e-42
MACS_peak_513	chr11	65188568	65189068	100	chr11	65188577	65189059	100	chr11-65188352-65189117	TTATGGAGCGGGGTGCG;GGATGTGGGAAGAAATG	positives	2.38525	3.6621e-10
MACS_peak_450	chr11	5711639	5712139	100	chr11	5711809	5711968	100	chr11-5711607-5712196	AATTAGCCGCTAGTCCG	positives	3.14233	2.64134e-14
MACS_peak_464	chr11	17400125	17400625	77.4	chr11	17400254	17400496	100	chr11-17400238-17400769	ATGTTATACATCGTACG	positives	3.74007	1.81399e-26
MACS_peak_468	chr11	20505414	20505914	95.2	chr11	20505488	20505839	100	chr11-20505438-20505994	CAAATGAAATGGACTAC	positives	4.34922	6.63418e-43
MACS_peak_478	chr11	28542544	28543044	70.6	chr11	28542598	28542989	76.2148	chr11-28542691-28543347	GATGGACTGGGGCCCCG	positives	4.38973	7.30352e-27
MACS_peak_481	chr11	33082937	33083437	85.8	chr11	33082995	33083378	96.8668	chr11-33082668-33083366	GTTCCTTGTGAGACGGT	positives	3.76265	4.85792e-27
MACS_peak_483	chr11	34706862	34707362	62.4	chr11	34707008	34707215	80.1932	chr11-34706531-34707174	GTAGCACGTGCGCCATG	positives	3.28799	2.43879e-18
MACS_peak_519	chr11	66386633	66387133	79.2	chr11	66386690	66387075	88.0519	chr11-66386232-66387029	CATGGTGGACTGGTCCG	positives	2.56702	2.96182e-16
MACS_peak_532	chr11	73846179	73846679	100	chr11	73846227	73846631	100	chr11-73846167-73846810	TTCAAGTAACGGTGAGG	positives	2.69218	1.25421e-15
MACS_peak_543	chr11	78867055	78867555	100	chr11	78867164	78867445	100	chr11-78866802-78867573	CAGGGGGGGGTGAAGGG	positives	3.12749	4.16431e-24
MACS_peak_571	chr11	86046305	86046805	100	chr11	86046308	86046802	100	chr11-86046198-86047015	CGCCTGCAATCCGATTG	positives	3.09478	5.35504e-23
MACS_peak_573	chr11	94798446	94798946	77.6	chr11	94798559	94798833	100	chr11-94798198-94798834	GGGGTAGGGTGAGGGAC	positives	2.09642	2.53743e-09
MACS_peak_750	chr12	88953416	88954066	66.7692	chr12	88953383	88954099	65.2235	chr12-88953632-88954099	GGGGTGAAGGGCTGGGC;AGTGAGGGAGTGAGGGG	positives	4.04076	6.47348e-43
MACS_peak_616	chr12	15688115	15688615	87	chr12	15688203	15688527	100	chr12-15688015-15688550	GGGGGTGGCTGCAAACA;CTGGGCCGCAGACGTGT	positives	3.32675	3.94159e-32
MACS_peak_765	chr12	93178216	93178716	88.6	chr12	93178297	93178635	100	chr12-93178273-93178728	TGTAATATTGGAGGCGA;GAAGGTATGTAGGACGG	positives	3.59423	5.28992e-49
MACS_peak_596	chr12	2113494	2114094	100	chr12	2113455	2114132	100	chr12-2113290-2114251	TGCCGTATGCTCCTGAG	positives	3.11258	3.22791e-23
MACS_peak_618	chr12	18502557	18503057	99	chr12	18502648	18502965	100	chr12-18502552-18503052	TAGTGGAGAAATGAGAA	positives	3.36954	1.03439e-24
MACS_peak_620	chr12	19584451	19585201	72.9333	chr12	19584404	19585247	69.9881	chr12-19584408-19584998	GAGGTGCGCGGTCCGAC	positives	1.791	0.00181416
MACS_peak_636	chr12	47949958	47950458	99.2	chr12	47950034	47950381	100	chr12-47949873-47950454	AGGCACGGGTCGTTGGG	positives	3.78177	9.97341e-32
MACS_peak_670	chr12	57425045	57425545	98.8	chr12	57425159	57425431	100	chr12-57424559-57425539	GGCCTGGGAGTGACGGG	positives	3.54126	7.90193e-18
MACS_peak_688	chr12	65377576	65378226	81.3846	chr12	65377541	65378261	78.3333	chr12-65377697-65378298	GGGCGGCTTGGGTAAGG	positives	3.30602	1.08147e-12
MACS_peak_689	chr12	68435841	68436341	71.4	chr12	68435975	68436207	96.1207	chr12-68435426-68436198	TCCTCGCCCGGGGTGTA	positives	3.51753	8.03988e-31
MACS_peak_699	chr12	70914670	70915170	76.2	chr12	70914678	70915162	77.0661	chr12-70914423-70915051	TGCTATAGACCGCGGCC	positives	4.36986	3.51074e-44
MACS_peak_712	chr12	75571732	75572232	89.6	chr12	75571826	75572137	100	chr12-75571784-75572321	TGGCATTCTCCGGCACC	positives	3.27937	6.14484e-27
MACS_peak_723	chr12	78550951	78551451	100	chr12	78551110	78551292	100	chr12-78550581-78551458	TTTGAGCAAATGTATAA	positives	2.67857	4.60799e-14
MACS_peak_725	chr12	79139680	79140230	77.4545	chr12	79139650	79140260	74.7541	chr12-79139804-79140312	GGGCGACCCTCCACTCA	positives	2.79048	7.81222e-14
MACS_peak_730	chr12	81171774	81172274	82.2	chr12	81171797	81172251	85.4626	chr12-81171863-81172486	GAAAAATAAGCTAAGAT	positives	2.06945	3.36351e-05
MACS_peak_760	.	-1	-1	0	chr12	90628192	90628723	86.4407	chr12-90628064-90628651	TGGGTTATAGACAGGAG	positives	2.73776	8.93943e-12
MACS_peak_763	chr12	92296571	92297071	81.8	chr12	92296577	92297064	82.7515	chr12-92296489-92296980	ATAGTGGTAAAGTGCCG	positives	4.11061	2.02129e-34
MACS_peak_770	chr12	94866940	94867440	98.8	chr12	94867050	94867329	100	chr12-94866801-94867434	ATACTGCGCTGGAGACG	positives	2.80921	1.75569e-17
MACS_peak_809	chr12	125423029	125423779	69.6	chr12	125422993	125423815	63.5036	chr12-125423059-125423581	AGCTATGCTTGGTTGAG	positives	2.75763	5.04566e-08
MACS_peak_813	chr12	127380592	127381142	92.5455	chr12	127380552	127381182	87.1429	chr12-127380633-127381571	CAAAACTCGTGGATAGG	positives	3.21831	3.19532e-30
MACS_peak_848	chr13	48646458	48646958	89.6	chr13	48646419	48646996	84.2288	chr13-48646510-48647240	CAATATGTGACCGTCGG;ACCAGTGGGCACCAAAG	positives	2.8247	1.25182e-14
MACS_peak_867	chr13	114539985	114540835	65.8824	chr13	114539940	114540880	59.5745	chr13-114540133-114540693	CCGGTATGTCGCAGTAC;GTTGCACCGTGCCTTGC	positives	2.18528	1.33963e-10
MACS_peak_823	chr13	20936734	20937234	74.4	chr13	20936766	20937201	78.1609	chr13-20936554-20937106	GGAACGCCTGGCGTCTC	positives	4.31605	1.27521e-34
MACS_peak_861	chr13	91002966	91003466	100	chr13	91003078	91003354	100	chr13-91002775-91003647	ATACGTTAGATCGTAGG	positives	3.2861	2.83636e-14
MACS_peak_938	chr14	71331720	71332220	90.2	chr14	71331740	71332199	93.6819	chr14-71331769-71332294	AACAGGGGCCCTACAAC;AAGTGGCCAGACGGGGT	positives	3.03577	1.26897e-31
MACS_peak_883	chr14	34766704	34767354	73.5385	chr14	34766678	34767379	68.1883	chr14-34766798-34767276	GGAGGTTGGGCCTGGGT;CTCCCTATATGCGAATA	positives	3.66483	1.99468e-52
MACS_peak_191352	chr14	21565141	21565641	79.4	.	0	0	0	chr14-21565244-21565852	AACCGTTGCTTACCGCA	positives	1.54411	6.7686e-05
MACS_peak_872	chr14	24139649	24140149	70.8	chr14	24139606	24140191	67.6923	chr14-24139795-24140315	CCGCCCCGCCCTGGTCC	positives	3.22862	6.15943e-16
MACS_peak_880	.	-1	-1	0	chr14	32490057	32490265	100	chr14-32489711-32490625	GCTGGAGGTGCACTACT	positives	2.41224	2.08694e-16
MACS_peak_882	chr14	32814442	32814992	100	chr14	32814405	32815029	100	chr14-32814376-32815266	TGGGGGGAGATGGGGGC	positives	2.64278	6.25304e-17
MACS_peak_887	chr14	37290108	37290608	100	chr14	37290151	37290564	100	chr14-37289823-37290816	CCAGCGGCATACGGAGA	positives	3.53192	8.81337e-27
MACS_peak_890	chr14	39492915	39493465	94.1818	chr14	39492886	39493493	89.9506	chr14-39492947-39493883	TCGGCCACGCGCTGTTG	positives	3.29922	3.3342e-21
MACS_peak_906	chr14	51066757	51067407	74.4615	chr14	51066707	51067456	71.1615	chr14-51066923-51067499	GCGGGCACTCTGTCAGG	positives	3.4353	2.6528e-21
MACS_peak_908	chr14	57132915	57133415	100	chr14	57132934	57133396	100	chr14-57132588-57133525	CGGCCCCAGGATGAAAG	positives	3.34774	5.36863e-21
MACS_peak_922	chr14	61592396	61592896	72	chr14	61592543	61592749	100	chr14-61592045-61592756	TTGCTGTTGTGCGGGAC	positives	4.06081	8.54301e-25
MACS_peak_931	chr14	67399244	67399894	76.3077	chr14	67399212	67399925	74.0533	chr14-67399012-67399740	TGGGTGATAAGAGGCAG	positives	2.09792	3.60649e-08
MACS_peak_937	chr14	70477775	70478275	91.8	chr14	70477885	70478164	100	chr14-70477730-70478234	CTAAGGTGGCGGGCTGA	positives	3.22328	2.5367e-12
MACS_peak_940	.	-1	-1	0	chr14	72240711	72241152	68.9342	chr14-72240318-72241015	TAATGGGGTTCGACGGG	positives	2.83873	4.64797e-15
MACS_peak_992	chr14	103453502	103454002	71.6	chr14	103453563	103453941	78.5714	chr14-103453335-103453860	CGGCCTAGCGGGGCGGG	positives	2.57554	5.31745e-16
MACS_peak_998	chr14	107067952	107068452	72.4	chr14	107068030	107068374	82.5581	chr14-107068090-107068737	TGGGATGTTAAGGTGGG	positives	3.51404	1.2416e-26
MACS_peak_1004	chr15	33437674	33438174	100	chr15	33437692	33438155	100	chr15-33437657-33438267	TTACGGGGGCAAGCGCC	positives	3.08261	1.25306e-18
MACS_peak_1019	chr15	49917672	49918472	86.375	chr15	49917641	49918502	83.856	chr15-49917635-49918363	GGACCCGCCTGACGATG	positives	4.40709	1.26713e-45
MACS_peak_1024	chr15	51090062	51090562	100	chr15	51090072	51090552	100	chr15-51090034-51090619	CTACCATTGATTTATTA	positives	2.6776	3.53194e-19
MACS_peak_1031	chr15	52955666	52956316	82.6154	chr15	52955639	52956342	80.0853	chr15-52955779-52956436	GGCCATCAGAGTGCTGG	positives	4.09997	1.17151e-31
MACS_peak_1053	chr15	56497151	56497651	98.6	chr15	56497195	56497606	100	chr15-56497158-56498102	TCTGGGAGCGGAGAGTG	positives	3.41885	2.407e-23
MACS_peak_1055	chr15	56532425	56533125	60	chr15	56532390	56533160	59.0909	chr15-56532705-56533458	CCCGGCAGTTGAGCGGG	positives	4.17907	1.72311e-27
MACS_peak_1059	chr15	56922700	56923200	83.2	chr15	56922717	56923182	85.8065	chr15-56922397-56923116	TGACTCGGGAGCTACGG	positives	3.26175	1.39375e-25
MACS_peak_1064	chr15	59457742	59458442	62	chr15	59457705	59458479	60.8527	chr15-59458008-59458556	TTCACGTGAGGGGAACG	positives	3.39527	6.72896e-20
MACS_peak_1092	.	-1	-1	0	chr15	80295437	80295741	76.9737	chr15-80295507-80296296	ATATCGAGGGGATCAGG	positives	2.97246	6.65863e-14
MACS_peak_1093	chr15	80777552	80778052	100	chr15	80777526	80778078	100	chr15-80777507-80778323	GTTTAAGGGGAGATTAA	positives	3.42067	2.07253e-26
MACS_peak_1125	chr16	4190589	4191089	70.2	chr16	4190561	4191117	68.1655	chr16-4190738-4191316	GTAGCTGGGTGTACAGT;TAAACATGCTCAATGTC;GAACGGGACTATGGGTC	positives	2.86457	2.62476e-29
MACS_peak_1126	chr16	4675782	4676282	90.6	chr16	4675859	4676205	100	chr16-4675829-4676508	GGCCGGTATGGTGTAAA	positives	1.60179	7.48421e-08
MACS_peak_1127	chr16	5455671	5456171	65.2	chr16	5455749	5456093	72.093	chr16-5455391-5455997	GTAGTACGTGATGGCCC	positives	3.60593	4.15478e-15
MACS_peak_1133	chr16	12632258	12632758	100	chr16	12632381	12632635	100	chr16-12632213-12632852	GGGGCGGAGCTGCCGTT	positives	2.21316	2.20336e-07
MACS_peak_1137	chr16	20876931	20877581	65.5385	chr16	20876888	20877623	63.6735	chr16-20877155-20877705	TGGTGCCGGTGTCATGG	positives	4.07793	9.55506e-25
MACS_peak_1141	chr16	24392956	24393456	89	chr16	24393083	24393329	100	chr16-24392870-24393401	CGGGTAAGGCAGGTCAT	positives	3.81341	1.94493e-18
MACS_peak_1142	chr16	25564987	25565487	83	chr16	25564937	25565537	77.5	chr16-25565072-25565716	CTATGCCGGACGGTGGG	positives	3.91926	5.33034e-29
MACS_peak_1143	.	-1	-1	0	chr16	25580363	25580582	83.5616	chr16-25580050-25580546	CCCGGGGAATGAACTAT	positives	2.51801	1.28101e-09
MACS_peak_1163	chr16	60022458	60022958	99	chr16	60022498	60022918	100	chr16-60022463-60023027	CTGTGAGGCTGGGGACG	positives	3.73217	1.58716e-23
MACS_peak_1164	chr16	64471515	64472015	69.6	chr16	64471607	64471922	80.9524	chr16-64471667-64472309	GGCTGGACAAGCGTGGT	positives	3.24646	1.30588e-11
MACS_peak_1166	chr16	65802860	65803360	86.2	chr16	65802851	65803368	85.1064	chr16-65802605-65803291	ACGCGGCGGCTGTTGGG	positives	3.54832	2.54267e-28
MACS_peak_1215	.	-1	-1	0	chr16	78029503	78030187	82.7485	chr16-78029621-78030293	TGGACAGAGGGGGTATG	positives	4.44794	1.29263e-37
MACS_peak_1239	chr16	86158780	86159280	85.6	chr16	86158883	86159176	100	chr16-86158852-86159652	GCGTCGGTCTTTAATAT	positives	2.78053	9.24594e-13
MACS_peak_1244	chr16	89508282	89508882	100	chr16	89508234	89508929	99.7122	chr16-89508221-89508927	TTATCAAAGCAAATAGT	positives	3.6214	1.58841e-25
MACS_peak_1245	chr16	89524893	89525493	77.1667	chr16	89524863	89525522	74.8103	chr16-89524851-89525356	GTTGATGCCTGACTGCC	positives	3.18379	6.45179e-24
MACS_peak_1267	chr17	25658250	25658750	69	chr17	25658354	25658646	82.5342	chr17-25658405-25659041	GGAAGGTCGCTGCAGCG;AGGCCGGGGTGAGGCTG	positives	3.59531	3.89204e-35
MACS_peak_1310	chr17	55601204	55601854	78.9231	chr17	55601163	55601894	75.6498	chr17-55601341-55601976	TATTCGAGAATAAGGAT;CTGCGCGAGACGGACAG	positives	4.2577	2.40064e-58
MACS_peak_1290	chr17	48448863	48449363	86.6	chr17	48448986	48449239	100	chr17-48448811-48449296	AATGTGGGCGTCAGTGA;GTGGTATCGCTTATGAA	positives	3.87239	7.00574e-53
MACS_peak_1253	chr17	4757577	4758077	91.6	chr17	4757689	4757965	100	chr17-4757593-4758051	GTCAGGTCATTAGGTCA	positives	2.79602	2.31665e-11
MACS_peak_1272	chr17	28330949	28331449	82.6	chr17	28331056	28331342	100	chr17-28331036-28331516	AGCGAGCGACTGGAAGG	positives	4.20901	2.19732e-42
MACS_peak_1292	chr17	49026691	49027491	74.25	chr17	49026662	49027520	72.6107	chr17-49026897-49027545	GATCGACACCTTGTCCG	positives	3.96298	1.22958e-33
MACS_peak_1293	chr17	49031485	49032085	85	chr17	49031442	49032128	80.6122	chr17-49031382-49031995	GTGCGTGCCCCAACTGA	positives	3.81051	9.72182e-27
MACS_peak_1329	chr17	58922615	58923115	83.2	chr17	58922583	58923147	79.4326	chr17-58922097-58923031	GAGGCAAATGGAAAAGG	positives	4.67409	4.78314e-46
MACS_peak_1330	chr17	59361548	59362948	69.3571	chr17	59361518	59362977	66.5524	chr17-59361763-59362734	TCTCCGGATATGGGTGC	positives	3.42557	9.60175e-34
MACS_peak_1354	chr17	61869636	61870136	62.8	chr17	61869661	61870111	64.2222	chr17-61869454-61869950	GGTGGCAGTTGGGGTGC	positives	3.49984	1.37063e-26
MACS_peak_1355	chr17	62106665	62107165	69	chr17	62106807	62107023	93.9815	chr17-62106820-62107387	TCGGTACGTTGGATCGG	positives	1.8618	4.48098e-09
MACS_peak_1411	chr18	7034987	7035487	86.4	chr18	7035106	7035368	100	chr18-7034788-7035419	CCGCGAAGGCGGGAGGG	positives	3.81761	1.29692e-21
MACS_peak_1422	chr18	20857279	20857779	75.8	chr18	20857417	20857640	100	chr18-20857400-20858105	AGGGTGGCTTGGGCATG	positives	2.9271	1.63282e-17
MACS_peak_1452	chr18	77889896	77890396	88.4	chr18	77890014	77890278	100	chr18-77889376-77890338	GGTAGCTGAGAGGAGGC	positives	1.72997	1.56376e-05
MACS_peak_296666	chr18	43649622	43650122	100	.	0	0	0	chr18-43649535-43650327	ATGGTTTGTGTCAATGT	positives	2.89601	1.17895e-19
MACS_peak_1518	chr19	42034500	42035000	99.4	chr19	42034581	42034918	100	chr19-42034501-42034998	CCGTGAGCGCATCGCAC;AGGGTCTGGGACGGTGG	positives	4.02632	1.08176e-41
MACS_peak_1529	chr19	47735593	47736093	90.6	chr19	47735671	47736014	100	chr19-47735290-47736046	GCCCTGCAAGCGCTATT;GGGGTAAACATTTCTAG	positives	2.06435	7.97272e-08
MACS_peak_1540	chr19	53798307	53798807	66.8	chr19	53798258	53798856	64.0468	chr19-53798092-53798641	AGTGTACTTATTCTGGG	positives	3.5842	6.48106e-17
MACS_peak_1594	chr2	25107918	25108418	95	chr2	25108058	25108277	100	chr2-25107622-25108393	TTGGCCGGCGGTCCAAG;ACGGAAGGGTGGAGGGG	positives	2.18396	3.41907e-22
MACS_peak_1737	chr2	147454675	147455175	100	chr2	147454745	147455104	100	chr2-147454510-147455272	TCATGCGGAGTCCTATC;TAGTGAACCGCCTGGTG	positives	4.10928	4.82774e-70
MACS_peak_1556	chr2	1492423	1493373	82.2105	chr2	1492391	1493405	77.0217	chr2-1492574-1493355	GGGGCTAGTGGGTGGCG	positives	3.97119	5.74599e-24
MACS_peak_1576	chr2	14428105	14428605	100	chr2	14428164	14428545	100	chr2-14428065-14428737	GGGCTCAAGGACGCTGG	positives	3.29381	1.15072e-15
MACS_peak_1582	chr2	17996880	17997380	63.6	chr2	17996964	17997295	70.6949	chr2-17996504-17997198	AGGCGATGGGCGGCGGG	positives	3.34878	6.52642e-14
MACS_peak_1602	chr2	30188828	30189528	83.1429	chr2	30188800	30189556	80.6878	chr2-30188750-30189410	TTGTGTTAGTCTGAGAC	positives	4.9888	2.60907e-38
MACS_peak_1627	chr2	46399374	46399874	100	chr2	46399344	46399904	100	chr2-46399334-46399981	CTGGTTGGACGGCCGGT	positives	4.74246	1.97705e-43
MACS_peak_1628	chr2	46662105	46662605	100	chr2	46662181	46662529	100	chr2-46662080-46662664	AGAAACTGCTGGGTCTT	positives	2.95384	1.0432e-14
MACS_peak_1629	chr2	47197963	47198463	86.6	chr2	47198025	47198401	98.6702	chr2-47197886-47198396	GGACGCTCAACGATACG	positives	1.79397	9.00681e-06
MACS_peak_1630	chr2	49068143	49068643	88	chr2	49068167	49068619	92.0354	chr2-49067925-49068583	GGATTCCCGGAGAGCCG	positives	4.08674	3.39522e-35
MACS_peak_1652	.	-1	-1	0	chr2	62187132	62187375	98.7654	chr2-62186866-62187372	ATTGTGTTAGACGGAAT	positives	3.15387	1.77334e-13
MACS_peak_1661	chr2	73121063	73121563	100	chr2	73121074	73121551	100	chr2-73121000-73121616	ACGGGTCTAAGGAGAGT	positives	2.19988	3.22272e-11
MACS_peak_1670	.	-1	-1	0	chr2	81153229	81153463	100	chr2-81152910-81153574	TAGGGTACATATGGGCA	positives	3.98054	8.4046e-18
MACS_peak_1678	chr2	88837767	88838267	66.8	chr2	88837784	88838249	68.172	chr2-88837685-88838101	GATACTCGACGGCAGGT	positives	2.02273	0.00028581
MACS_peak_1728	.	-1	-1	0	chr2	135348291	135348567	100	chr2-135348157-135348718	GGGCGGCCATGGACGGC	positives	4.45408	1.24223e-43
MACS_peak_1730	chr2	137133035	137133535	70.4	chr2	137133043	137133526	71.2215	chr2-137132538-137133387	CGTCAGCACCGCGCCGG	positives	3.64839	1.2037e-30
MACS_peak_1746	chr2	151150204	151150704	78.8	chr2	151150275	151150633	90.2235	chr2-151149980-151150598	ATCGTCGCTAGGTCCGG	positives	3.89097	1.15995e-22
MACS_peak_1764	.	-1	-1	0	chr2	164809677	164810357	100	chr2-164809632-164810529	GGGTCCGACCAAAACAC	positives	3.05673	1.5482e-16
MACS_peak_1776	chr2	171077985	171078635	77.0769	chr2	171077939	171078681	73.7197	chr2-171077551-171078486	ATGGGCATCGTGTGAGG	positives	3.27351	7.87043e-15
MACS_peak_1795	chr2	178034740	178035290	95.4545	chr2	178034702	178035327	90.08	chr2-178034541-178035265	TGGTCATGATGTTTGGC	positives	2.98653	8.91196e-11
MACS_peak_1810	chr2	186432607	186433107	100	chr2	186432561	186433152	100	chr2-186432427-186433185	CTCGCAAGCGATGGAGT	positives	1.89515	0.000382665
MACS_peak_1825	chr2	194018182	194018682	68.8	chr2	194018317	194018547	90.8696	chr2-194017966-194018526	GTTCTGCATCGAAGTTC	positives	1.97268	6.53328e-07
MACS_peak_1860	chr2	216002454	216002954	82.2	chr2	216002437	216002971	80.1498	chr2-216002543-216003115	TCTTGGTTAATTGGGCT	positives	2.21923	5.82394e-09
MACS_peak_1884	chr2	226480284	226480784	100	chr2	226480335	226480732	100	chr2-226480275-226480965	GCTCTAGTCGGGCCGAG	positives	2.92153	6.92142e-13
MACS_peak_1911	chr20	18832886	18833386	96	chr20	18832965	18833306	100	chr20-18832906-18833536	GCGCATTGAGTGCATTT;GAGGGTTTTATGGCTTG	positives	3.22963	8.91411e-40
MACS_peak_1970	chr20	57639341	57639841	78.8	chr20	57639448	57639734	100	chr20-57639248-57639735	CACATCTGCTCTAGTGT;GAGTCTTAGACTGGTCG	positives	3.09648	2.12892e-42
MACS_peak_1901	chr20	7752955	7753455	71.2	chr20	7753043	7753367	82.716	chr20-7753099-7753705	AGTATGAGGTGATTCCT	positives	3.26033	2.13888e-21
MACS_peak_1903	chr20	10099857	10100357	84.8	chr20	10099845	10100368	83.3652	chr20-10099786-10100281	CGTTTGGAACGGTCTGA	positives	3.20179	1.30588e-11
MACS_peak_1904	chr20	10713784	10714284	100	chr20	10713781	10714287	100	chr20-10713730-10714729	AGGCATATGCAGCACGC	positives	3.0717	5.41662e-17
MACS_peak_1906	.	-1	-1	0	chr20	15285022	15285187	100	chr20-15284967-15285357	AGGTTCTAGGTGCAGGA	positives	4.90715	1.53093e-57
MACS_peak_1917	chr20	23081024	23081524	80.8	chr20	23081105	23081443	95.5621	chr20-23081120-23082259	TTAGAGTTTTGAGTCTG	positives	3.84063	1.01406e-36
MACS_peak_1926	chr20	30266339	30266939	79	chr20	30266302	30266976	70.3264	chr20-30266439-30266913	GGGGGCTATGGGGGGCG	positives	2.82959	3.22471e-13
MACS_peak_1936	chr20	40494532	40495032	83.8	chr20	40494698	40494866	100	chr20-40494612-40495031	GTGCTGGACAGTGTGTC	positives	3.94793	2.92958e-31
MACS_peak_1944	chr20	46293278	46294728	63.5862	chr20	46293241	46294765	60.4987	chr20-46293461-46294383	TTGGCCACTTCGACACA	positives	3.57394	2.72305e-30
MACS_peak_1946	chr20	46621298	46622398	69.4545	chr20	46621272	46622423	66.3771	chr20-46621459-46622223	GCTGAGCGGTTAAAGTG	positives	3.42371	6.89137e-18
MACS_peak_1950	chr20	50594409	50594909	90.4	chr20	50594411	50594907	90.7258	chr20-50594457-50594990	TCAGGGGGTGATGGGTA	positives	1.84266	0.000192792
MACS_peak_1984	chr21	34739548	34740048	97.2	chr21	34739617	34739979	100	chr21-34739562-34740240	GGGATGGAAATCGAACC	positives	3.97804	4.29953e-34
MACS_peak_1986	chr21	41650113	41650613	100	chr21	41650126	41650599	100	chr21-41649934-41650784	GTGGGCGGCGTAGCGCG	positives	2.65502	8.5761e-17
MACS_peak_2009	chr22	29378965	29379465	74.8	chr22	29379107	29379322	100	chr22-29379091-29379827	GGCAGCCTGCGCGGGAG	positives	3.79807	2.10237e-30
MACS_peak_2011	chr22	30641590	30642190	85.8333	chr22	30641564	30642216	78.9877	chr22-30641657-30642172	GCTCAACTTGTGTTAGG	positives	2.28528	7.51285e-06
MACS_peak_2013	chr22	31614879	31615379	100	chr22	31615004	31615254	100	chr22-31614626-31615415	ACTGGCCCAGGCTGAGC	positives	3.24305	2.81228e-25
MACS_peak_2033	chr22	47525384	47525884	68.4	chr22	47525434	47525833	72.9323	chr22-47525542-47526073	AATGGTGCGAGAGGTTG	positives	2.54195	4.65026e-07
MACS_peak_2255	chr3	194908247	194908747	78.6	chr3	194908231	194908763	76.8797	chr3-194908354-194908846	ATTGTCGGGGTCAACAG;AGACTCTCGCCCTGGGG	positives	3.88352	3.63329e-59
MACS_peak_2047	chr3	3601352	3601852	74.6	chr3	3601313	3601890	71.4038	chr3-3601151-3601725	CCTTACGGGGTAGGTAT;GACGGGAATGGTCCGCA	positives	3.85338	2.812e-41
MACS_peak_2192	chr3	125838192	125838692	65.4	chr3	125838279	125838604	81.5385	chr3-125838217-125838544	CTGGTAGGAATCAGGGT;GGTTGATGGCGAGAGGT	positives	2.97098	2.23869e-26
MACS_peak_2214	chr3	151033649	151034149	77.4	chr3	151033705	151034093	85.3093	chr3-151033762-151034359	ATCCACGGCTCGATGGG;TCCCCATTAGGGAAGGG	positives	3.07926	2.71151e-39
MACS_peak_2145	chr3	82409882	82410382	100	chr3	82410016	82410247	100	chr3-82409793-82410527	GGGCATTGTTGCCGTTC;TTGGGTGTGTTTTTAGT	positives	1.63509	2.10212e-12
MACS_peak_2036	chr3	152715	153215	79.2	chr3	152680	153249	75.5712	chr3-152819-153400	CGTCGGAGTCAACTCCC	positives	2.29974	1.53218e-05
MACS_peak_2039	chr3	1110732	1111232	69.4	chr3	1110766	1111198	72.4537	chr3-1110529-1111079	GGAAATCTCGATTCTCG	positives	3.31302	3.02046e-24
MACS_peak_2040	chr3	1113802	1114302	74	chr3	1113896	1114208	88.4615	chr3-1113655-1114172	CATTAAGTTGTTGGGTT	positives	1.6513	0.000204699
MACS_peak_2066	chr3	13567503	13568003	68.6	chr3	13567535	13567971	71.3303	chr3-13567337-13567846	CGGCGGCCCGGCCGAGC	positives	2.57727	1.86942e-13
MACS_peak_2069	chr3	14530087	14530587	80	chr3	14530133	14530540	86.7322	chr3-14530187-14530709	GCTTGCGGTAAATGGGG	positives	3.00982	9.59451e-12
MACS_peak_2099	.	-1	-1	0	chr3	30135057	30135396	70.7965	chr3-30134633-30135297	TTTTACGTCGCACAGCG	positives	3.26936	3.96576e-20
MACS_peak_2120	chr3	63819638	63820138	84.8	chr3	63819733	63820043	100	chr3-63819714-63820320	TGGCACGCACGAGACGA	positives	2.26694	1.00092e-09
MACS_peak_2149	chr3	83983513	83984113	100	chr3	83983479	83984146	100	chr3-83983400-83984378	AATGGACAGGTCCGGGT	positives	3.1914	3.41262e-12
MACS_peak_2152	chr3	85556870	85557370	100	chr3	85557002	85557238	100	chr3-85556413-85557401	AGTGTGGGACTGGGGAA	positives	2.88432	1.03932e-15
MACS_peak_2180	chr3	111228180	111228680	89.4	chr3	111228276	111228584	100	chr3-111228233-111228764	GAGGGGTGGCGGGGCGA	positives	3.71094	6.59669e-33
MACS_peak_2189	chr3	122653008	122653508	81.4	chr3	122653153	122653362	100	chr3-122652739-122653415	AGGTGCGAAGGTGGTGT	positives	1.92243	5.76414e-13
MACS_peak_2202	.	-1	-1	0	chr3	140142461	140142639	100	chr3-140142352-140142946	TACGTAAGGAGCGGAAG	positives	3.93742	3.61394e-38
MACS_peak_2209	.	-1	-1	0	chr3	146299793	146300071	100	chr3-146299632-146300177	TAGCGGGCCATTAGGTT	positives	4.22372	5.62619e-38
MACS_peak_2217	chr3	153031463	153031963	100	chr3	153031550	153031876	100	chr3-153031462-153032001	CCGCTAGCAGGTGCAGT	positives	2.44261	2.59875e-11
MACS_peak_2218	chr3	153332342	153332842	100	chr3	153332304	153332880	100	chr3-153332280-153332942	AGTGTGGCGTACCTCGG	positives	3.71212	1.20681e-21
MACS_peak_2326	chr4	71566950	71567450	62.4	chr4	71566987	71567412	64.4706	chr4-71567138-71567683	TAGCACGGGTGAGGAGC;TTGAGCGAAAAGAAGTA;CGATTGCTGGACATTCT	positives	2.20448	1.11933e-42
MACS_peak_2434	chr4	187841621	187842121	89.4	chr4	187841698	187842043	100	chr4-187841472-187842068	CTACATAAAAGTTAAAC;ACAGGTCCTCATACGTT	positives	3.38407	2.01344e-34
MACS_peak_2430	chr4	173903381	173903881	85	chr4	173903438	173903823	95.5844	chr4-173903206-173903806	TTTACTCGATTGTATGA;GGAAGGGACACGGATTG	positives	3.61348	2.41117e-52
MACS_peak_532151	chr4	128704656	128705156	100	.	0	0	0	chr4-128704616-128705165	GTAAACCCGTTGTTTGT;GGAGGGGATTAACGAGC	positives	3.80828	4.8587e-47
MACS_peak_2344	chr4	84092024	84092524	65.6	chr4	84092008	84092539	64.7834	chr4-84091722-84092352	ACACCGTATTCCGTACG;GGGGGACGCTCAGCTAC	positives	2.25887	4.56793e-31
MACS_peak_2336	chr4	78801785	78802285	72.4	chr4	78801842	78802228	79.0155	chr4-78801923-78802419	TGCTCGGGGGCTCCAGT;GTTACAGGAGAAGTCCG	positives	2.83033	1.06179e-34
MACS_peak_2309	chr4	52917772	52918472	72.4286	chr4	52917732	52918511	65.0834	chr4-52917789-52918296	GCGTCTGAGTCGGAACT;TCGGGAAGAGCGAAGAC	positives	2.77211	7.23052e-32
MACS_peak_2387	chr4	123719143	123719793	74.1538	chr4	123719116	123719819	72.404	chr4-123718968-123719625	TTGGCTCTGTAAATTGT;TGTTTGGTAGTATATTT	positives	1.5918	0.000394772
MACS_peak_2269	chr4	5914265	5914765	100	chr4	5914325	5914704	100	chr4-5914200-5914883	GGAATCACTGTGGCGGT	positives	3.86966	3.49979e-36
MACS_peak_2275	chr4	8065362	8065862	89.4	chr4	8065411	8065812	99.0025	chr4-8065415-8066340	TCGACTCGCAGGGCGGA	positives	4.93382	1.26713e-45
MACS_peak_2291	chr4	28353505	28354005	84.4	chr4	28353578	28353932	98.5876	chr4-28353027-28353927	TTTTTTGTGACGTTGCT	positives	3.8015	1.18923e-33
MACS_peak_2292	chr4	31236141	31236641	83	chr4	31236212	31236570	96.0894	chr4-31235904-31236556	CGCTTGGACAGGAGGTT	positives	1.92588	0.000262891
MACS_peak_2295	chr4	33748626	33749126	92.4	chr4	33748601	33749151	88.5455	chr4-33748664-33749212	AGAACAAGGCGAAACGG	positives	3.05309	3.88711e-11
MACS_peak_2302	chr4	41146778	41147278	64.8	chr4	41146931	41147125	88.1443	chr4-41146954-41147530	ATTGAGTTGCTGTGGTG	positives	3.0486	2.43037e-18
MACS_peak_2303	chr4	42325693	42326193	100	chr4	42325777	42326109	100	chr4-42325454-42326294	TGAGGAGGGGCTGAGGT	positives	3.34881	4.96482e-31
MACS_peak_2333	chr4	77703052	77703652	81.8333	chr4	77703021	77703683	76.284	chr4-77703161-77703666	GAGAGGGGCCCCGCGGC	positives	3.69444	9.65726e-22
MACS_peak_2353	chr4	99884336	99884836	76.8	chr4	99884463	99884708	100	chr4-99884452-99884978	CGGAGGGTGGCGTGGTG	positives	2.68195	1.29556e-17
MACS_peak_2363	chr4	103730891	103731391	95.2	chr4	103731021	103731261	100	chr4-103730915-103731437	GGCGGAGCGGGCGGACG	positives	2.62943	5.72819e-16
MACS_peak_2386	chr4	123698005	123698505	100	chr4	123698028	123698482	100	chr4-123697891-123698515	GTGAGGGGGGGGAACCG	positives	3.45525	1.0788e-20
MACS_peak_2393	.	-1	-1	0	chr4	129607215	129607522	100	chr4-129607129-129607769	GCGAAGTTGCATAGGTG	positives	3.21029	3.46464e-17
MACS_peak_2413	chr4	157692418	157692918	75.2	chr4	157692409	157692926	74.4681	chr4-157691959-157692794	TAGCGTATAGCAACCCA	positives	3.5783	6.01986e-26
MACS_peak_2814	chr5	172719346	172719846	100	chr5	172719307	172719884	93.2409	chr5-172719346-172719916	AGGTCGGGCCCAGTAAT;AAGCGAGTCCTCGCTTT	positives	2.62632	1.73122e-26
MACS_peak_2700	chr5	110830056	110830806	92	chr5	110830010	110830852	83.848	chr5-110830116-110830822	ACATGGGTAACCTGCGG;AGGTCCAGCGGGGGTTG	positives	3.58445	1.24267e-46
MACS_peak_2471	chr5	37847950	37848450	97.4	chr5	37847913	37848486	91.274	chr5-37847963-37848871	AATATTGACGGATTACT;GATAGGCCCATGGCAGG	positives	3.87427	1.43059e-40
MACS_peak_2629	chr5	79762990	79763490	72	chr5	79762981	79763499	71.2355	chr5-79763130-79763726	TCCGGATGACTATCGCG;GGAAAGATGTGCATTAA	positives	3.788	1.20336e-44
MACS_peak_2595	chr5	57130979	57131479	79	chr5	57130945	57131513	75.5282	chr5-57130688-57131374	GGGATACCAGCTTGGGA;TCAGGGGCAGGCTCCCC	positives	2.5383	3.29563e-12
MACS_peak_2802	chr5	163546878	163547378	70.8	chr5	163546880	163547376	70.9677	chr5-163547024-163547528	CTTATGTCGTTTGGAAC;TCGTGGACGGACAAGAG	positives	3.21482	9.57941e-24
MACS_peak_2600	chr5	61575827	61576327	100	chr5	61575786	61576368	95.189	chr5-61575814-61576404	AGGCCTGGGTAGCGTAT;TTCGCAGTCGGTAACCG	positives	3.66706	8.40262e-44
MACS_peak_2437	chr5	4019374	4019874	100	chr5	4019484	4019763	100	chr5-4019284-4019917	TCACGATGAAAATCTTC	positives	3.37718	4.15004e-15
MACS_peak_2439	chr5	10528489	10528989	91.2	chr5	10528615	10528863	100	chr5-10528533-10529033	CGGAGTGGCGGTAAGTG	positives	1.64859	0.000177505
MACS_peak_2464	chr5	27471952	27472452	94	chr5	27472017	27472386	100	chr5-27471982-27472579	GAGGCCTGACAACACAC	positives	2.7817	2.26969e-08
MACS_peak_2472	chr5	38427186	38427686	71.2	chr5	38427175	38427696	70.2495	chr5-38427330-38428094	GCCAGAGGAGAGTCTCC	positives	3.51356	4.92595e-27
MACS_peak_2490	chr5	40601192	40601692	100	chr5	40601222	40601661	100	chr5-40600847-40601918	GTGGGGCCTCTCATCTC	positives	3.44012	8.77123e-21
MACS_peak_2512	chr5	42598284	42598784	96.4	chr5	42598328	42598740	100	chr5-42598054-42598766	GCAGAGGTGGCCCACGG	positives	2.06397	0.000122608
MACS_peak_2530	chr5	43208697	43209197	96.4	chr5	43208700	43209193	96.9574	chr5-43208715-43209571	GGGCAATGACTGAGGGG	positives	2.94675	6.34189e-17
MACS_peak_2587	chr5	52786497	52786997	81.4	chr5	52786632	52786861	100	chr5-52786369-52786904	TGTCGAATACCGCTACG	positives	3.28406	1.15723e-12
MACS_peak_2593	chr5	56157755	56158255	100	chr5	56157874	56158136	100	chr5-56157670-56158498	TGAAGCGAGGGTAGCAG	positives	3.03863	1.13567e-17
MACS_peak_2594	chr5	56363303	56363803	99	chr5	56363271	56363835	93.4397	chr5-56363053-56363798	CGAGATCCTAATGACTG	positives	2.78579	1.243e-14
MACS_peak_2609	chr5	66390621	66391121	71.8	chr5	66390613	66391128	71.068	chr5-66390762-66391359	GACGCGAGAACTCGTGG	positives	2.63469	3.26367e-17
MACS_peak_2619	chr5	73942907	73943407	100	chr5	73942971	73943342	100	chr5-73942816-73943413	GTGGGTTTAGTTTCGGT	positives	3.7018	4.78738e-38
MACS_peak_2664	chr5	98182287	98182787	76.2	chr5	98182331	98182743	81.7961	chr5-98182095-98182668	GGATGGGAGGCAGCGCA	positives	3.14005	4.80954e-16
MACS_peak_2703	chr5	111815075	111815575	69	chr5	111815148	111815501	76.7705	chr5-111815230-111815870	CGAGGGATGCAGGCCTT	positives	2.97321	5.49326e-10
MACS_peak_2706	chr5	113010771	113011271	86	chr5	113010754	113011288	83.7079	chr5-113010841-113011473	GGGGTGGTCATGACCGG	positives	2.83367	1.45325e-15
MACS_peak_2721	chr5	118659448	118659948	78.8	chr5	118659290	118659540	100	chr5-118659164-118659842	CATTTCTAGGTGTAGCG	positives	3.92388	1.93995e-35
MACS_peak_2735	chr5	128513205	128513705	100	chr5	128513170	128513739	92.6186	chr5-128513194-128513721	GGGGGAGAGGAAAGGCC	positives	2.51233	1.26548e-08
MACS_peak_2747	chr5	131100914	131101414	79.2	chr5	131100980	131101348	89.6739	chr5-131101018-131101520	GAGGCGATATTGGCGGG	positives	2.57425	1.58032e-10
MACS_peak_2765	chr5	141948403	141948903	70.6	chr5	141948521	141948785	89.0152	chr5-141948550-141949148	GAGGAGCCGGGGCGGAT	positives	3.20059	4.56013e-19
MACS_peak_2774	chr5	148704694	148705194	83	chr5	148704768	148705120	96.875	chr5-148704317-148705109	GGGTTGGCCGAGGCTTG	positives	2.8695	1.85155e-15
MACS_peak_2816	chr5	173755516	173756116	81.3333	chr5	173755490	173756141	78.8018	chr5-173755628-173756292	GTGCGACTATCGGGATT	positives	3.51973	5.98832e-14
MACS_peak_2880	chr6	37212502	37213002	66.6	chr6	37212521	37212983	67.9654	chr6-37212314-37212835	TGCCGGTAGGTGGGGTA;GACAGGGGTACGCGCGG	positives	2.49662	1.50911e-14
MACS_peak_3015	chr6	109218530	109219030	71	chr6	109218638	109218922	86.9718	chr6-109218239-109218885	GTTTCCGTCATCGACGG;GGAAGAGGAGGGGCTCC	positives	1.81313	3.66868e-25
MACS_peak_2834	chr6	583060	583560	94	chr6	583175	583444	100	chr6-583090-584024	GCGGGCCATGTTAACGC	positives	2.90403	6.79171e-16
MACS_peak_2843	chr6	10718752	10719252	67.6	chr6	10718809	10719194	72.7273	chr6-10718914-10719362	TAGTGAGTAAACGACCG	positives	2.72769	1.38879e-11
MACS_peak_2846	chr6	14105601	14106101	78.8	chr6	14105658	14106043	87.2727	chr6-14105707-14106220	CTGGACCAGCCAACCGG	positives	2.27911	6.5236e-13
MACS_peak_2850	chr6	18326258	18326758	98.2	chr6	18326320	18326695	100	chr6-18326267-18326926	GGGGGGTTCACGCTCGG	positives	2.96732	2.669e-21
MACS_peak_2856	chr6	24827394	24827894	82	chr6	24827518	24827769	100	chr6-24827484-24828145	GCTATTACTCTATCGGA	positives	3.77151	9.04436e-29
MACS_peak_2865	chr6	31296227	31296727	93.8	chr6	31296287	31296666	100	chr6-31296130-31296696	ATGAGCAGATTACAAAC	positives	4.46474	1.54153e-37
MACS_peak_2867	chr6	31304810	31305360	92.9091	chr6	31304772	31305397	87.84	chr6-31304588-31305321	GTTGATGGGGAGTGTTG	positives	2.75956	2.87357e-08
MACS_peak_2877	chr6	36644967	36645467	100	chr6	36644943	36645490	100	chr6-36644661-36645568	TATAGTCACTGCGTTAA	positives	3.71929	5.47652e-35
MACS_peak_2878	chr6	36650058	36650558	89	chr6	36650114	36650501	100	chr6-36649824-36650503	GTAGGTACACGCGAAAG	positives	3.76713	4.91418e-19
MACS_peak_2881	chr6	38362001	38362501	86.2	chr6	38362098	38362403	100	chr6-38361506-38362432	TGGCGCTAGCGGGGCTC	positives	3.55208	2.65684e-27
MACS_peak_2889	chr6	41814298	41814798	75.8	chr6	41814345	41814751	81.7734	chr6-41814419-41815096	TAGGAGGTGGGAGAGAG	positives	3.37265	9.31115e-22
MACS_peak_2890	chr6	43064179	43064679	99.2	chr6	43064222	43064636	100	chr6-43063720-43064675	TCGTGTTGTAGACGCGC	positives	2.73627	5.78824e-10
MACS_peak_2896	chr6	44652892	44653392	78.8	chr6	44652886	44653397	78.0822	chr6-44652998-44653672	CCCTTCTGGCTGGTGGA	positives	3.80218	1.22701e-22
MACS_peak_2900	chr6	48078730	48079280	94.3636	chr6	48078691	48079319	88.8535	chr6-48078551-48079249	CTGATTAGATGTTAACG	positives	3.73897	1.03858e-21
MACS_peak_2974	chr6	85545644	85546144	100	chr6	85545763	85546025	100	chr6-85545603-85546311	GATGTGGGGGGCTGTGC	positives	3.77794	7.35644e-17
MACS_peak_2993	chr6	94854508	94855008	65.2	chr6	94854572	94854943	70.6199	chr6-94854335-94854834	GGTGAAATAATTCTTAC	positives	2.68164	7.56098e-09
MACS_peak_2996	chr6	96604254	96604754	97.4	chr6	96604340	96604667	100	chr6-96604267-96604895	CCAAGGAACAGAGAGGG	positives	3.65794	1.13998e-27
MACS_peak_3016	chr6	109329895	109330395	78	chr6	109329857	109330432	74.4348	chr6-109329728-109330285	CGGCGGATTAACGCGGG	positives	2.98315	4.93736e-21
MACS_peak_3017	.	-1	-1	0	chr6	110203321	110203591	100	chr6-110203083-110203632	CGTCCGTGTTGGGTGCT	positives	4.20841	5.42359e-33
MACS_peak_3018	chr6	111428163	111428663	100	chr6	111428214	111428611	100	chr6-111428132-111428773	TAGTACCACGTGGCATG	positives	3.30602	6.5827e-14
MACS_peak_3019	chr6	111804943	111805593	90.9231	chr6	111804909	111805626	86.053	chr6-111804917-111805534	GCGGACAGGGGGACGGG	positives	3.08332	5.9692e-11
MACS_peak_3020	chr6	112308450	112308950	65.4	chr6	112308499	112308901	69.1542	chr6-112308623-112309132	CTGTGGTTCTCCGCCCA	positives	4.30766	3.85749e-35
MACS_peak_3023	chr6	115392089	115392589	78.6	chr6	115392180	115392498	94.9686	chr6-115392196-115392778	TCAAGTCAGGGGTAGTC	positives	2.78853	3.66963e-17
MACS_peak_3034	chr6	122961369	122961869	67.8	chr6	122961437	122961800	74.6556	chr6-122960911-122961708	GTGCATGAGTATGAGCC	positives	1.99035	4.21675e-10
MACS_peak_3044	chr6	127907432	127907932	97	chr6	127907560	127907803	100	chr6-127907447-127907994	GCTGGTCACCGGTAGGG	positives	3.44057	2.81262e-15
MACS_peak_3055	chr6	138733887	138734387	69.6	chr6	138733978	138734295	81.0726	chr6-138733595-138734235	CATTTGCGCCGTACAAG	positives	1.71627	2.37689e-16
MACS_peak_3067	chr6	149657632	149658132	94	chr6	149657759	149658004	100	chr6-149657487-149658102	CGGGGGCAGTAGCGCCT	positives	3.59576	7.03164e-27
MACS_peak_3068	chr6	151178186	151178686	100	chr6	151178204	151178668	100	chr6-151178145-151178893	GATTGTCAAAACTACCT	positives	2.72575	5.95049e-08
MACS_peak_3070	chr6	152542909	152543409	91.2	chr6	152542941	152543377	97.2477	chr6-152542953-152543889	CTCAGGGTACGCGGGTC	positives	3.94118	3.32074e-39
MACS_peak_3071	chr6	152635002	152635502	100	chr6	152635129	152635374	100	chr6-152634804-152635596	CATGCAGGAACACTCGC	positives	2.43339	2.95464e-16
MACS_peak_3077	chr6	170108933	170109433	100	chr6	170109035	170109330	100	chr6-170108835-170109454	ACTAGGGGTTGGTCCAG	positives	1.74728	1.49613e-06
MACS_peak_3241	chr7	151769530	151770030	90.4	chr7	151769629	151769931	100	chr7-151769578-151770204	GGTGAGGTCATAAGGGG;TCGGGGATGGTATGACG;GGGCTGATAGCGGTTTG	positives	4.01291	1.78782e-73
MACS_peak_3123	chr7	37631865	37632365	100	chr7	37631930	37632299	100	chr7-37631804-37632461	CGTGTTGGTGGGTGAGG;AGGTTAAGCAGCTGGGT	positives	3.64764	6.11527e-61
MACS_peak_3255	chr7	159103443	159103943	67	chr7	159103553	159103833	80.3571	chr7-159103608-159104362	GTTCTTGTTGGACGGGG;GGGGAGTGGACCAGGGG	positives	3.8273	3.93499e-43
MACS_peak_3147	chr7	70314504	70315004	100	chr7	70314527	70314981	100	chr7-70314398-70315090	TGGGATACGTTGAGGGG;TGTCATGAGGGGTCCTG	positives	3.88022	6.97928e-41
MACS_peak_3098	chr7	12596934	12597584	100	chr7	12596896	12597621	100	chr7-12596845-12597777	TCGTCGTCGCGATGTAG	positives	3.2635	2.24402e-16
MACS_peak_3104	chr7	18460444	18460944	99.4	chr7	18460409	18460978	87.6977	chr7-18460447-18460946	TTCCTGGTATGATGAGA	positives	3.3751	3.21334e-14
MACS_peak_3121	chr7	33327314	33328014	82.8571	chr7	33327288	33328039	80.6924	chr7-33327036-33327894	TGGGAGTATGTACGTGT	positives	3.29274	5.02107e-12
MACS_peak_3122	chr7	33391219	33391719	100	chr7	33391285	33391653	100	chr7-33391013-33391862	ATCGGTCCCACAAGGGG	positives	3.12425	2.10044e-14
MACS_peak_3126	chr7	40883243	40883743	98.8	chr7	40883308	40883677	100	chr7-40883249-40883937	CATAAGGCGCAGGAGGC	positives	3.28452	4.82332e-23
MACS_peak_3139	chr7	51392739	51393239	93.6	chr7	51392831	51393146	100	chr7-51392771-51393279	CGGAGGCAGGGAGAGGC	positives	3.77905	8.36095e-32
MACS_peak_3141	chr7	52251635	52252135	100	chr7	52251771	52251998	100	chr7-52251622-52252141	ATGGGGGGACCGTGTGG	positives	3.13123	2.70649e-12
MACS_peak_3162	chr7	81252378	81252878	62.6	chr7	81252434	81252821	66.1499	chr7-81252565-81253097	CAGTCGCATTAGTCAGT	positives	4.99074	2.62625e-41
MACS_peak_3172	chr7	95959417	95959917	69.8	chr7	95959479	95959854	76.5333	chr7-95959208-95959766	GACCATCTTTTAGTCTT	positives	4.12407	2.01908e-30
MACS_peak_3176	chr7	99335188	99335688	91	chr7	99335222	99335653	97.6798	chr7-99334833-99335643	CGGGTCACGACTGCGTT	positives	5.23466	3.63513e-54
MACS_peak_3196	chr7	121150963	121151463	72.4	chr7	121151053	121151372	84.953	chr7-121151101-121151464	CGGGGCGGTGGAGGGGC	positives	2.71003	2.40423e-08
MACS_peak_3203	chr7	131459405	131459905	78.8	chr7	131459470	131459839	88.8889	chr7-131459511-131460261	GAGTGGCTCGGAGCGTG	positives	3.97458	2.40724e-26
MACS_peak_3211	chr7	134530060	134530560	61.6	chr7	134530139	134530481	66.9591	chr7-134529548-134530368	CTGGACTGTTTCGCTCA	positives	4.85837	7.42374e-38
MACS_peak_3216	chr7	137849291	137849991	74.1429	chr7	137849254	137850027	71.9276	chr7-137849217-137849810	GCGTTCAGGGTAACAGA	positives	1.9296	0.000626507
MACS_peak_3217	chr7	138116204	138116704	100	chr7	138116282	138116625	100	chr7-138116096-138116825	CTATGGGTTGAGTGGCC	positives	4.20157	6.2297e-39
MACS_peak_3219	chr7	140567641	140568141	100	chr7	140567604	140568178	90.0697	chr7-140567631-140568148	CTCTAGTTCCATGCGCC	positives	3.48918	3.23937e-29
MACS_peak_3232	chr7	148099226	148099726	100	chr7	148099205	148099747	98.893	chr7-148099211-148100007	GGTGTGGGTGAACTGGT	positives	3.63508	3.21404e-17
MACS_peak_3239	chr7	151385194	151385694	83.4	chr7	151385181	151385706	81.7143	chr7-151385277-151385783	TGTTGTTGACCAATAAT	positives	3.24959	9.3643e-24
MACS_peak_3246	chr7	152687025	152687525	100	chr7	152686735	152687015	28.5714	chr7-152686935-152687533	CGCGGGACGGGGTGGAC	positives	3.89831	2.84447e-27
MACS_peak_3263	chr8	5178931	5179431	95	chr8	5178974	5179387	100	chr8-5178956-5179486	ATCAGGTGACCCCACCA;GTGTGTAGTTGTGTGTT	positives	2.52881	1.08198e-23
MACS_peak_3256	.	-1	-1	0	chr8	164478	164727	74.6988	chr8-164541-165103	GAGCCCAGGGAATACTG	positives	2.06196	5.37028e-05
MACS_peak_3262	chr8	2352234	2352734	74.4	chr8	2352284	2352684	93	chr8-2352303-2352675	GTGCGGGGGGGGGAACG	positives	2.80337	1.56257e-14
MACS_peak_3266	chr8	8264754	8265254	100	chr8	8264807	8265200	100	chr8-8264702-8265272	TAGCGGTCGGTTGTCGA	positives	3.03087	4.97944e-14
MACS_peak_3280	chr8	18898963	18899513	80.1818	chr8	18898913	18899563	74.1538	chr8-18898922-18899404	ATCTGGTGTAGGTGGGG	positives	3.641	1.77609e-20
MACS_peak_3282	chr8	20285473	20285973	100	chr8	20285516	20285929	100	chr8-20285457-20286031	TAGCCGCGGTAAAGCGG	positives	3.87742	1.17579e-24
MACS_peak_3290	chr8	29627806	29628406	68.3333	chr8	29627773	29628438	66.6165	chr8-29627718-29628216	GGAGGGAGTATCGAGGG	positives	2.53939	8.98301e-07
MACS_peak_3293	chr8	32642627	32643127	97	chr8	32642720	32643033	100	chr8-32642607-32643112	CCATACGTGGTATGCAC	positives	3.77153	4.08933e-21
MACS_peak_3297	chr8	50022835	50023335	100	chr8	50022785	50023385	93.5	chr8-50022824-50023436	GGGGGAGGGATGAGGTC	positives	2.99257	1.53044e-20
MACS_peak_3304	.	-1	-1	0	chr8	57864965	57865358	86.0051	chr8-57865020-57865650	CTTGAAGATGAGGCTGG	positives	4.49826	2.96908e-34
MACS_peak_3330	chr8	94763146	94763646	79.6	chr8	94763140	94763652	78.9062	chr8-94762921-94763544	CGGGCGTAGGCCGGGCA	positives	2.29553	1.54666e-10
MACS_peak_3342	chr8	103248626	103249526	69.2222	chr8	103248582	103249570	67.5101	chr8-103248903-103249707	GCGAGCATATAGGCCAA	positives	3.92495	1.09437e-22
MACS_peak_3343	chr8	103439109	103439609	87.2	chr8	103439168	103439549	98.6877	chr8-103439173-103439878	GTTTATCGTAAGTTTGG	positives	2.94032	4.52329e-14
MACS_peak_3351	chr8	107620586	107621186	93.3333	chr8	107620553	107621219	89.039	chr8-107620626-107621345	CCTGCGGCATGAGAGAT	positives	2.94255	7.0356e-14
MACS_peak_3396	chr8	121948831	121949331	90.8	chr8	121948848	121949313	93.9785	chr8-121948721-121949285	GTGGACGGGAGGTGCAG	positives	4.0198	1.55987e-33
MACS_peak_3401	chr8	124624496	124624996	100	chr8	124624474	124625018	100	chr8-124624465-124625187	CGTTTTATGCCGGGCAT	positives	3.66489	5.77968e-27
MACS_peak_3402	chr8	124856559	124857809	70.56	chr8	124856525	124857842	66.9704	chr8-124856905-124857787	AAGGACAGTCGACGGCC	positives	4.40547	4.71098e-51
MACS_peak_3411	chr8	127592136	127592686	100	chr8	127592093	127592728	100	chr8-127591876-127592982	GAGAGTGTAGCAAGGGT	positives	2.76932	4.73488e-16
MACS_peak_3412	chr8	128807345	128808445	62.6364	chr8	128807314	128808476	60.5852	chr8-128807756-128808460	AAGTGTCGGGGAAAATG	positives	3.06597	6.77742e-21
MACS_peak_3415	chr8	131697663	131698163	100	chr8	131697446	131697673	100	chr8-131697331-131698311	GGACCAAGCTCCAGCGG	positives	3.40475	2.19659e-32
MACS_peak_3421	chr8	133037473	133037973	73.4	chr8	133037443	133038003	70.8929	chr8-133037606-133038267	GCGGGCCAAGTGGCTGG	positives	4.11814	7.0344e-22
MACS_peak_3427	chr8	138769585	138770085	100	chr8	138769718	138769951	100	chr8-138769348-138770089	GAGCGACTTCGGGTTGT	positives	3.27051	6.95696e-28
MACS_peak_3437	chr8	144198561	144199061	74.4	chr8	144198554	144199068	73.7354	chr8-144198279-144198933	CCGCACGTGTAGGATGA	positives	4.36164	3.06542e-43
MACS_peak_3494	chr9	97959851	97960351	82.6	chr9	97959831	97960371	80.1852	chr9-97959938-97960589	GGGAGGGCGGCCGTATG;CCGAACAGTGCTGTGTG	positives	1.84896	4.97259e-16
MACS_peak_3556	chr9	128973660	128974160	61.6	chr9	128973798	128974022	75.8929	chr9-128973326-128973968	TCGATCAGGTCCGGCTG;TTGGTAACGTCACATTT	positives	3.70011	1.88848e-62
MACS_peak_3447	chr9	1707233	1707733	100	chr9	1707300	1707665	100	chr9-1706872-1707738	ACAGACGATATAGTAAC	positives	3.74866	2.98517e-30
MACS_peak_3476	chr9	84636045	84636695	88.6154	chr9	84636009	84636730	84.7434	chr9-84636119-84636843	GGGGCTTGATCTGGAGC	positives	3.31956	6.95365e-16
MACS_peak_3480	chr9	87127382	87127882	100	chr9	87127375	87127888	100	chr9-87127346-87128344	GTGCGTGATTTGTGGGT	positives	3.80421	2.07099e-23
MACS_peak_3488	chr9	94909519	94910019	61.6	chr9	94909488	94910049	60.4278	chr9-94909137-94909827	AGGAACGTCACACTACG	positives	1.98937	0.000370094
MACS_peak_3496	chr9	98699268	98699768	100	chr9	98699253	98699783	100	chr9-98698793-98699894	TGTAAGAGGTGGCGGGT	positives	3.69428	1.84609e-21
MACS_peak_3519	chr9	110500317	110500867	84.9091	chr9	110500280	110500903	80.8989	chr9-110500095-110500784	CCCAGTTCCCAACTTAG	positives	2.51058	4.70276e-09
MACS_peak_3523	chr9	111251778	111252278	69.2	chr9	111251776	111252279	69.1849	chr9-111251578-111252124	GAGCAGGGCAAGGAGAG	positives	3.51661	4.9903e-14
MACS_peak_3530	chr9	115061856	115062356	83.6	chr9	115061938	115062273	100	chr9-115061865-115062283	CCGGTACCAGCGCTGAC	positives	3.13469	1.17623e-14
MACS_peak_3534	chr9	117670507	117671207	61.2857	chr9	117670470	117671243	60.1552	chr9-117670778-117671449	CAGTATTGGTCGGCCAG	positives	4.24605	3.49279e-29
MACS_peak_3548	chr9	124084588	124085088	86.4	chr9	124084546	124085129	81.1321	chr9-124084656-124085499	ACGGACGAATGAAATGT	positives	3.42143	2.17178e-14
MACS_peak_3551	chr9	125313587	125314087	68	chr9	125313647	125314027	73.6842	chr9-125313747-125314510	GGCGATTCCGGTCGGGG	positives	3.68732	8.64667e-28
MACS_peak_3596	chrX	46818108	46818608	100	chrX	46818065	46818650	88.3761	chrX-46818097-46818614	GGGGTGCGAGCTTAAGT;CCGACCACTGGCAATTC	positives	3.2271	8.07063e-48
MACS_peak_3597	chrX	47675226	47675726	99.2	chrX	47675310	47675642	100	chrX-47675230-47675762	CTAGGACGCCGCTAGCA;TATGACCCGTTGATTCC	positives	3.73557	2.19473e-51
MACS_peak_3574	chrX	4628588	4629138	75.2727	chrX	4628539	4629186	71.5611	chrX-4628472-4629002	ATGAACGGGTGCTCTGG	positives	3.93661	5.0303e-22
MACS_peak_3579	chrX	10729474	10729974	100	chrX	10729495	10729952	100	chrX-10729433-10730078	CTCTGGCTGGACACGTT	positives	4.384	2.11329e-39
MACS_peak_3599	chrX	53410486	53410986	70.6	chrX	53410564	53410907	79.8834	chrX-53410633-53411184	GCCTCTAAGAACGCTTG	positives	2.54336	1.30446e-06
MACS_peak_3622	chrX	134665584	134666084	77.2	chrX	134665742	134665926	100	chrX-134665401-134665970	GCGGCTAGGGCGCCCAG	positives	3.89312	9.55662e-31
