# Supplementary material for: Multiplex enhancer-reporter assays uncover unsophisticated TP53 enhancer logic
Source: HighWire-hosted journal article supplement (doi:10.1101/gr.204149.116), 2016-05-18
Supplement: Supplemental_Tables_S1-S5andS8.zip [file Supplemental_Table_S4.xlsx]

## Sheet: all
		baseMean	log2FoldChange	padj	chr	start	stop	name	overlap-region	overlap-design	chr	start	stop	name	overlap-region	overlap-ChIP	peakscore
MACS_peak_532151	chr4-128704726-128705126	38.0632	2.65365	0.0792534	chr4	128704656	128705156	MACS_peak_532151	1	0.8					0	0	47.92
MACS_peak_496660	chr3-190043631-190044031	12.6252	2.54648	0.137815	chr3	190043623	190044223	MACS_peak_496660	1	0.666667					0	0	51.06
MACS_peak_532151	chr4-128704725-128705125	10.3616	1.61104	0.368383	chr4	128704656	128705156	MACS_peak_532151	1	0.8					0	0	47.92
MACS_peak_532151	chr4-128704727-128705127	22.185	1.44732	0.387513	chr4	128704656	128705156	MACS_peak_532151	1	0.8					0	0	47.92
MACS_peak_532151	chr4-128704728-128705128	44.2231	1.17408	0.511295	chr4	128704656	128705156	MACS_peak_532151	1	0.8					0	0	47.92
MACS_peak_296666	chr18-43649624-43650024	14.9197	0.786	0.743012	chr18	43649622	43650122	MACS_peak_296666	1	0.8					0	0	44.05
MACS_peak_296666	chr18-43649626-43650026	12.7189	0.258075	0.941456	chr18	43649622	43650122	MACS_peak_296666	1	0.8					0	0	44.05
MACS_peak_357739	chr2-113882460-113882860	47.5469	0.204538	0.960285	chr2	113882475	113882975	MACS_peak_357739	0.9625	0.77					0	0	40.57
MACS_peak_532151	chr4-128704608-128705008	6.59005	0.0713723	0.970779	chr4	128704656	128705156	MACS_peak_532151	0.88	0.704					0	0	47.92
MACS_peak_532151	chr4-128704851-128705251	5.6042	-0.194233	0.970463	chr4	128704656	128705156	MACS_peak_532151	0.7625	0.61					0	0	47.92
MACS_peak_532151	chr4-128704693-128705093	11.4909	-0.499661	0.842147	chr4	128704656	128705156	MACS_peak_532151	1	0.8					0	0	47.92
MACS_peak_357739	chr2-113882576-113882976	6.25659	-0.517396	0.830685	chr2	113882475	113882975	MACS_peak_357739	0.9975	0.798					0	0	40.57
MACS_peak_498638	chr3-195315095-195315495	8.18829	-0.592671	0.830441	chr3	195315147	195315647	MACS_peak_498638	0.87	0.696					0	0	50.79
MACS_peak_357739	chr2-113882577-113882977	12.637	-0.710362	0.738567	chr2	113882475	113882975	MACS_peak_357739	0.995	0.796					0	0	40.57
MACS_peak_357739	chr2-113882572-113882972	6.98158	-0.925919	0.608618	chr2	113882475	113882975	MACS_peak_357739	1	0.8					0	0	40.57
MACS_peak_357739	chr2-113882462-113882862	111.949	-1.16852	0.326001	chr2	113882475	113882975	MACS_peak_357739	0.9675	0.774					0	0	40.57
MACS_peak_498638	chr3-195315242-195315642	40.1116	-1.54406	0.269417	chr3	195315147	195315647	MACS_peak_498638	1	0.8					0	0	50.79
MACS_peak_498638	chr3-195315092-195315492	9.52009	-2.00729	0.208463	chr3	195315147	195315647	MACS_peak_498638	0.8625	0.69					0	0	50.79
MACS_peak_498638	chr3-195315217-195315617	5.68194	-2.84766	0.0994549	chr3	195315147	195315647	MACS_peak_498638	1	0.8					0	0	50.79
MACS_peak_1003	chr15-31442739-31443139	173.487	6.25869	1.56477e-07							chr15	31442891	31443264	MACS_peak_1003	0.62	0.664879	145.09
MACS_peak_1004	chr15-33437680-33438080	140.465	3.80365	0.00562275	chr15	33437674	33438174	MACS_peak_1004	1	0.8	chr15	33437692	33438155	MACS_peak_1004	0.97	0.838013	189.31
MACS_peak_1004	chr15-33437681-33438081	66.3813	3.01674	0.0372547	chr15	33437674	33438174	MACS_peak_1004	1	0.8	chr15	33437692	33438155	MACS_peak_1004	0.9725	0.840173	189.31
MACS_peak_1004	chr15-33437682-33438082	275.583	2.73954	0.0246248	chr15	33437674	33438174	MACS_peak_1004	1	0.8	chr15	33437692	33438155	MACS_peak_1004	0.975	0.842333	189.31
MACS_peak_1004	chr15-33437588-33437988	38.4832	-1.72193	0.32268	chr15	33437674	33438174	MACS_peak_1004	0.785	0.628	chr15	33437692	33438155	MACS_peak_1004	0.74	0.639309	189.31
MACS_peak_1005	chr15-34599690-34600090	15.0258	-0.671758	0.813317	chr15	34599508	34600008	MACS_peak_1005	0.795	0.636	chr15	34599665	34599851	MACS_peak_1005	0.4025	0.865591	62.75
MACS_peak_1006	chr15-34962780-34963180	6.35249	-0.728777	0.739672	chr15	34962861	34963361	MACS_peak_1006	0.7975	0.638	chr15	34962985	34963237	MACS_peak_1006	0.4875	0.77381	63.14
MACS_peak_1012	chr15-42963483-42963883	13.1711	2.55374	0.0994549							chr15	42963513	42964094	MACS_peak_1012	0.925	0.636833	159.63
MACS_peak_1012	chr15-42963640-42964040	8.29233	1.56963	0.368953							chr15	42963513	42964094	MACS_peak_1012	1	0.688468	159.63
MACS_peak_1012	chr15-42963481-42963881	12.7501	1.29708	0.464062							chr15	42963513	42964094	MACS_peak_1012	0.92	0.633391	159.63
MACS_peak_1012	chr15-42963642-42964042	9.46722	0.938036	0.614407							chr15	42963513	42964094	MACS_peak_1012	1	0.688468	159.63
MACS_peak_1021	chr15-49975707-49976107	8.68844	2.89849	0.100133	chr15	49975527	49976027	MACS_peak_1021	0.8	0.64	chr15	49975620	49975933	MACS_peak_1021	0.565	0.722045	62.42
MACS_peak_1021	chr15-49975594-49975994	25.9068	2.75413	0.0994549	chr15	49975527	49976027	MACS_peak_1021	1	0.8	chr15	49975620	49975933	MACS_peak_1021	0.7825	1	62.42
MACS_peak_1021	chr15-49975596-49975996	25.986	0.312267	0.898522	chr15	49975527	49976027	MACS_peak_1021	1	0.8	chr15	49975620	49975933	MACS_peak_1021	0.7825	1	62.42
MACS_peak_1021	chr15-49975457-49975857	5.63305	0.298656	0.916805	chr15	49975527	49976027	MACS_peak_1021	0.825	0.66	chr15	49975620	49975933	MACS_peak_1021	0.5925	0.757188	62.42
MACS_peak_1021	chr15-49975695-49976095	8.93934	0.184935	0.970463	chr15	49975527	49976027	MACS_peak_1021	0.83	0.664	chr15	49975620	49975933	MACS_peak_1021	0.595	0.760383	62.42
MACS_peak_1021	chr15-49975458-49975858	8.92129	-0.363963	0.902951	chr15	49975527	49976027	MACS_peak_1021	0.8275	0.662	chr15	49975620	49975933	MACS_peak_1021	0.595	0.760383	62.42
MACS_peak_1021	chr15-49975696-49976096	7.05836	-0.504313	0.830441	chr15	49975527	49976027	MACS_peak_1021	0.8275	0.662	chr15	49975620	49975933	MACS_peak_1021	0.5925	0.757188	62.42
MACS_peak_1021	chr15-49975697-49976097	11.326	-0.681482	0.729931	chr15	49975527	49976027	MACS_peak_1021	0.825	0.66	chr15	49975620	49975933	MACS_peak_1021	0.59	0.753994	62.42
MACS_peak_1021	chr15-49975459-49975859	18.0758	-0.950777	0.588485	chr15	49975527	49976027	MACS_peak_1021	0.83	0.664	chr15	49975620	49975933	MACS_peak_1021	0.5975	0.763578	62.42
MACS_peak_1021	chr15-49975709-49976109	10.7046	-1.37656	0.411818	chr15	49975527	49976027	MACS_peak_1021	0.795	0.636	chr15	49975620	49975933	MACS_peak_1021	0.56	0.715655	62.42
MACS_peak_1021	chr15-49975694-49976094	8.14974	-1.48461	0.475516	chr15	49975527	49976027	MACS_peak_1021	0.8325	0.666	chr15	49975620	49975933	MACS_peak_1021	0.5975	0.763578	62.42
MACS_peak_1025	chr15-52156485-52156885	56.9822	4.70917	0.000983232	chr15	52156494	52157044	MACS_peak_1025	0.9775	0.710909	chr15	52156465	52157073	MACS_peak_1025	1	0.657895	169.77
MACS_peak_1025	chr15-52156643-52157043	33.6341	4.19944	0.0217686	chr15	52156494	52157044	MACS_peak_1025	1	0.727273	chr15	52156465	52157073	MACS_peak_1025	1	0.657895	169.77
MACS_peak_1025	chr15-52156498-52156898	6.01504	3.20143	0.0534783	chr15	52156494	52157044	MACS_peak_1025	1	0.727273	chr15	52156465	52157073	MACS_peak_1025	1	0.657895	169.77
MACS_peak_1025	chr15-52156499-52156899	12.825	3.07472	0.0994549	chr15	52156494	52157044	MACS_peak_1025	1	0.727273	chr15	52156465	52157073	MACS_peak_1025	1	0.657895	169.77
MACS_peak_1025	chr15-52156602-52157002	19.1041	2.75515	0.0789689	chr15	52156494	52157044	MACS_peak_1025	1	0.727273	chr15	52156465	52157073	MACS_peak_1025	1	0.657895	169.77
MACS_peak_1025	chr15-52156501-52156901	7.80758	2.73577	0.0886883	chr15	52156494	52157044	MACS_peak_1025	1	0.727273	chr15	52156465	52157073	MACS_peak_1025	1	0.657895	169.77
MACS_peak_1025	chr15-52156641-52157041	10.7372	2.04776	0.171987	chr15	52156494	52157044	MACS_peak_1025	1	0.727273	chr15	52156465	52157073	MACS_peak_1025	1	0.657895	169.77
MACS_peak_1025	chr15-52156603-52157003	19.1031	1.66641	0.299231	chr15	52156494	52157044	MACS_peak_1025	1	0.727273	chr15	52156465	52157073	MACS_peak_1025	1	0.657895	169.77
MACS_peak_1025	chr15-52156481-52156881	11.463	1.66141	0.316666	chr15	52156494	52157044	MACS_peak_1025	0.9675	0.703636	chr15	52156465	52157073	MACS_peak_1025	1	0.657895	169.77
MACS_peak_1025	chr15-52156642-52157042	5.81528	1.59546	0.444703	chr15	52156494	52157044	MACS_peak_1025	1	0.727273	chr15	52156465	52157073	MACS_peak_1025	1	0.657895	169.77
MACS_peak_1025	chr15-52156482-52156882	13.0764	1.36348	0.390455	chr15	52156494	52157044	MACS_peak_1025	0.97	0.705455	chr15	52156465	52157073	MACS_peak_1025	1	0.657895	169.77
MACS_peak_1025	chr15-52156484-52156884	31.3949	1.3551	0.46295	chr15	52156494	52157044	MACS_peak_1025	0.975	0.709091	chr15	52156465	52157073	MACS_peak_1025	1	0.657895	169.77
MACS_peak_1025	chr15-52156483-52156883	29.2532	1.23606	0.517892	chr15	52156494	52157044	MACS_peak_1025	0.9725	0.707273	chr15	52156465	52157073	MACS_peak_1025	1	0.657895	169.77
MACS_peak_1025	chr15-52156601-52157001	22.9416	1.20776	0.47961	chr15	52156494	52157044	MACS_peak_1025	1	0.727273	chr15	52156465	52157073	MACS_peak_1025	1	0.657895	169.77
MACS_peak_1025	chr15-52156536-52156936	8.51127	1.09928	0.599324	chr15	52156494	52157044	MACS_peak_1025	1	0.727273	chr15	52156465	52157073	MACS_peak_1025	1	0.657895	169.77
MACS_peak_1025	chr15-52156480-52156880	13.4914	0.921371	0.599642	chr15	52156494	52157044	MACS_peak_1025	0.965	0.701818	chr15	52156465	52157073	MACS_peak_1025	1	0.657895	169.77
MACS_peak_1025	chr15-52156502-52156902	12.8271	0.543787	0.8015	chr15	52156494	52157044	MACS_peak_1025	1	0.727273	chr15	52156465	52157073	MACS_peak_1025	1	0.657895	169.77
MACS_peak_1025	chr15-52156534-52156934	10.6176	0.314834	0.909713	chr15	52156494	52157044	MACS_peak_1025	1	0.727273	chr15	52156465	52157073	MACS_peak_1025	1	0.657895	169.77
MACS_peak_1025	chr15-52156596-52156996	270.64	0.0796022	0.973956	chr15	52156494	52157044	MACS_peak_1025	1	0.727273	chr15	52156465	52157073	MACS_peak_1025	1	0.657895	169.77
MACS_peak_1025	chr15-52156595-52156995	5.67275	-0.0599981	0.973423	chr15	52156494	52157044	MACS_peak_1025	1	0.727273	chr15	52156465	52157073	MACS_peak_1025	1	0.657895	169.77
MACS_peak_1025	chr15-52156492-52156892	6.94527	-1.27852	0.542041	chr15	52156494	52157044	MACS_peak_1025	0.995	0.723636	chr15	52156465	52157073	MACS_peak_1025	1	0.657895	169.77
MACS_peak_1025	chr15-52156459-52156859	5.52542	-2.83562	0.0994549	chr15	52156494	52157044	MACS_peak_1025	0.9125	0.663636	chr15	52156465	52157073	MACS_peak_1025	0.985	0.648026	169.77
MACS_peak_1026	chr15-52632193-52632593	5983.66	2.52144	0.010885	chr15	52632260	52632760	MACS_peak_1026	0.8325	0.666	chr15	52632317	52632703	MACS_peak_1026	0.69	0.715026	64.77
MACS_peak_1026	chr15-52632299-52632699	7.93702	-3.49766	0.0368875	chr15	52632260	52632760	MACS_peak_1026	1	0.8	chr15	52632317	52632703	MACS_peak_1026	0.955	0.989637	64.77
MACS_peak_1026	chr15-52632305-52632705	11.9158	0.344462	0.887404	chr15	52632260	52632760	MACS_peak_1026	1	0.8	chr15	52632317	52632703	MACS_peak_1026	0.965	1	64.77
MACS_peak_1026	chr15-52632391-52632791	10.5156	0.096997	0.970463	chr15	52632260	52632760	MACS_peak_1026	0.9225	0.738	chr15	52632317	52632703	MACS_peak_1026	0.78	0.80829	64.77
MACS_peak_1026	chr15-52632392-52632792	5.98017	0.0422937	0.981227	chr15	52632260	52632760	MACS_peak_1026	0.92	0.736	chr15	52632317	52632703	MACS_peak_1026	0.7775	0.805699	64.77
MACS_peak_1026	chr15-52632304-52632704	24.8055	0.00369445	0.998495	chr15	52632260	52632760	MACS_peak_1026	1	0.8	chr15	52632317	52632703	MACS_peak_1026	0.965	1	64.77
MACS_peak_1026	chr15-52632306-52632706	12.4136	-0.636273	0.74608	chr15	52632260	52632760	MACS_peak_1026	1	0.8	chr15	52632317	52632703	MACS_peak_1026	0.965	1	64.77
MACS_peak_1026	chr15-52632191-52632591	6779.63	-1.00275	0.250656	chr15	52632260	52632760	MACS_peak_1026	0.8275	0.662	chr15	52632317	52632703	MACS_peak_1026	0.685	0.709845	64.77
MACS_peak_1026	chr15-52632394-52632794	11.8554	-1.20995	0.46586	chr15	52632260	52632760	MACS_peak_1026	0.915	0.732	chr15	52632317	52632703	MACS_peak_1026	0.7725	0.800518	64.77
MACS_peak_1026	chr15-52632307-52632707	22.078	-1.33711	0.371715	chr15	52632260	52632760	MACS_peak_1026	1	0.8	chr15	52632317	52632703	MACS_peak_1026	0.965	1	64.77
MACS_peak_1026	chr15-52632205-52632605	7.57127	-2.41011	0.113655	chr15	52632260	52632760	MACS_peak_1026	0.8625	0.69	chr15	52632317	52632703	MACS_peak_1026	0.72	0.746114	64.77
MACS_peak_1034	chr15-53379756-53380156	11.7682	0.34401	0.91028	chr15	53379608	53380108	MACS_peak_1034	0.88	0.704	chr15	53379693	53380022	MACS_peak_1034	0.665	0.808511	61.49
MACS_peak_1034	chr15-53379758-53380158	8.22845	-1.17201	0.516319	chr15	53379608	53380108	MACS_peak_1034	0.875	0.7	chr15	53379693	53380022	MACS_peak_1034	0.66	0.802432	61.49
MACS_peak_1034	chr15-53379639-53380039	23.6731	-1.50795	0.429446	chr15	53379608	53380108	MACS_peak_1034	1	0.8	chr15	53379693	53380022	MACS_peak_1034	0.8225	1	61.49
MACS_peak_1034	chr15-53379714-53380114	16.0457	-1.60248	0.336236	chr15	53379608	53380108	MACS_peak_1034	0.985	0.788	chr15	53379693	53380022	MACS_peak_1034	0.77	0.93617	61.49
MACS_peak_1034	chr15-53379587-53379987	10.4524	-1.67018	0.328225	chr15	53379608	53380108	MACS_peak_1034	0.9475	0.758	chr15	53379693	53380022	MACS_peak_1034	0.735	0.893617	61.49
MACS_peak_1034	chr15-53379712-53380112	6.19784	-1.69631	0.340021	chr15	53379608	53380108	MACS_peak_1034	0.99	0.792	chr15	53379693	53380022	MACS_peak_1034	0.775	0.942249	61.49
MACS_peak_1035	chr15-53864313-53864713	6.01504	3.20143	0.0534783	chr15	53864335	53864835	MACS_peak_1035	0.945	0.756	chr15	53864407	53864763	MACS_peak_1035	0.765	0.859551	80.88
MACS_peak_1035	chr15-53864495-53864895	8.1918	2.14747	0.26888	chr15	53864335	53864835	MACS_peak_1035	0.85	0.68	chr15	53864407	53864763	MACS_peak_1035	0.67	0.752809	80.88
MACS_peak_1035	chr15-53864362-53864762	19.0868	0.711366	0.682288	chr15	53864335	53864835	MACS_peak_1035	1	0.8	chr15	53864407	53864763	MACS_peak_1035	0.8875	0.997191	80.88
MACS_peak_1035	chr15-53864363-53864763	15.015	-0.708568	0.778934	chr15	53864335	53864835	MACS_peak_1035	1	0.8	chr15	53864407	53864763	MACS_peak_1035	0.89	1	80.88
MACS_peak_1035	chr15-53864315-53864715	13.7691	-0.905765	0.65433	chr15	53864335	53864835	MACS_peak_1035	0.95	0.76	chr15	53864407	53864763	MACS_peak_1035	0.77	0.865169	80.88
MACS_peak_1035	chr15-53864364-53864764	47.6045	-0.905974	0.581107	chr15	53864335	53864835	MACS_peak_1035	1	0.8	chr15	53864407	53864763	MACS_peak_1035	0.89	1	80.88
MACS_peak_1035	chr15-53864297-53864697	19.6141	-1.52642	0.412785	chr15	53864335	53864835	MACS_peak_1035	0.905	0.724	chr15	53864407	53864763	MACS_peak_1035	0.725	0.814607	80.88
MACS_peak_1037	chr15-53936227-53936627	9.38506	2.93119	0.0908374	chr15	53936055	53936555	MACS_peak_1037	0.82	0.656	chr15	53936131	53936479	MACS_peak_1037	0.63	0.724138	65.54
MACS_peak_1037	chr15-53936226-53936626	7.54749	-0.532095	0.825139	chr15	53936055	53936555	MACS_peak_1037	0.8225	0.658	chr15	53936131	53936479	MACS_peak_1037	0.6325	0.727011	65.54
MACS_peak_1037	chr15-53936089-53936489	10.7832	-0.969918	0.59787	chr15	53936055	53936555	MACS_peak_1037	1	0.8	chr15	53936131	53936479	MACS_peak_1037	0.87	1	65.54
MACS_peak_1037	chr15-53936109-53936509	5.69209	-2.87187	0.0994549	chr15	53936055	53936555	MACS_peak_1037	1	0.8	chr15	53936131	53936479	MACS_peak_1037	0.87	1	65.54
MACS_peak_1037	chr15-53936182-53936582	13.0476	-3.07186	0.0696924	chr15	53936055	53936555	MACS_peak_1037	0.9325	0.746	chr15	53936131	53936479	MACS_peak_1037	0.7425	0.853448	65.54
MACS_peak_1038	chr15-54001757-54002157	8.66896	2.71523	0.114449	chr15	54001810	54002310	MACS_peak_1038	0.8675	0.694	chr15	54001837	54002282	MACS_peak_1038	0.8	0.719101	97.23
MACS_peak_1038	chr15-54001846-54002246	16.828	1.94977	0.289239	chr15	54001810	54002310	MACS_peak_1038	1	0.8	chr15	54001837	54002282	MACS_peak_1038	1	0.898876	97.23
MACS_peak_1038	chr15-54001977-54002377	5.86645	0.956205	0.65238	chr15	54001810	54002310	MACS_peak_1038	0.8325	0.666	chr15	54001837	54002282	MACS_peak_1038	0.7625	0.685393	97.23
MACS_peak_1038	chr15-54001807-54002207	6.21307	0.412676	0.871654	chr15	54001810	54002310	MACS_peak_1038	0.9925	0.794	chr15	54001837	54002282	MACS_peak_1038	0.925	0.831461	97.23
MACS_peak_1038	chr15-54001838-54002238	6.1762	-0.0898986	0.970463	chr15	54001810	54002310	MACS_peak_1038	1	0.8	chr15	54001837	54002282	MACS_peak_1038	1	0.898876	97.23
MACS_peak_1038	chr15-54001975-54002375	11.4651	-0.497617	0.826825	chr15	54001810	54002310	MACS_peak_1038	0.8375	0.67	chr15	54001837	54002282	MACS_peak_1038	0.7675	0.689888	97.23
MACS_peak_1038	chr15-54001759-54002159	5.63105	-0.637826	0.765528	chr15	54001810	54002310	MACS_peak_1038	0.8725	0.698	chr15	54001837	54002282	MACS_peak_1038	0.805	0.723596	97.23
MACS_peak_1038	chr15-54001880-54002280	11.7002	-0.76327	0.678167	chr15	54001810	54002310	MACS_peak_1038	1	0.8	chr15	54001837	54002282	MACS_peak_1038	1	0.898876	97.23
MACS_peak_1038	chr15-54001836-54002236	13.6733	-0.858794	0.652619	chr15	54001810	54002310	MACS_peak_1038	1	0.8	chr15	54001837	54002282	MACS_peak_1038	0.9975	0.896629	97.23
MACS_peak_1038	chr15-54001844-54002244	11.188	-0.910879	0.619604	chr15	54001810	54002310	MACS_peak_1038	1	0.8	chr15	54001837	54002282	MACS_peak_1038	1	0.898876	97.23
MACS_peak_1038	chr15-54001879-54002279	26.3316	-1.01577	0.682288	chr15	54001810	54002310	MACS_peak_1038	1	0.8	chr15	54001837	54002282	MACS_peak_1038	1	0.898876	97.23
MACS_peak_1038	chr15-54001845-54002245	5.75388	-1.35344	0.507741	chr15	54001810	54002310	MACS_peak_1038	1	0.8	chr15	54001837	54002282	MACS_peak_1038	1	0.898876	97.23
MACS_peak_1038	chr15-54002014-54002414	6.60241	-1.37496	0.426229	chr15	54001810	54002310	MACS_peak_1038	0.74	0.592	chr15	54001837	54002282	MACS_peak_1038	0.67	0.602247	97.23
MACS_peak_1038	chr15-54001805-54002205	12.5251	-1.71397	0.279656	chr15	54001810	54002310	MACS_peak_1038	0.9875	0.79	chr15	54001837	54002282	MACS_peak_1038	0.92	0.826966	97.23
MACS_peak_1038	chr15-54001806-54002206	9.90298	-1.79872	0.253053	chr15	54001810	54002310	MACS_peak_1038	0.99	0.792	chr15	54001837	54002282	MACS_peak_1038	0.9225	0.829213	97.23
MACS_peak_1038	chr15-54001808-54002208	12.422	-2.47737	0.195652	chr15	54001810	54002310	MACS_peak_1038	0.995	0.796	chr15	54001837	54002282	MACS_peak_1038	0.9275	0.833708	97.23
MACS_peak_1039	chr15-54218518-54218918	7.00854	2.53676	0.165343	chr15	54218372	54218872	MACS_peak_1039	0.885	0.708	chr15	54218450	54218793	MACS_peak_1039	0.6875	0.801749	59.81
MACS_peak_1039	chr15-54218392-54218792	150.502	-0.862349	0.789502	chr15	54218372	54218872	MACS_peak_1039	1	0.8	chr15	54218450	54218793	MACS_peak_1039	0.855	0.997085	59.81
MACS_peak_1039	chr15-54218474-54218874	7.36056	-1.51828	0.370658	chr15	54218372	54218872	MACS_peak_1039	0.995	0.796	chr15	54218450	54218793	MACS_peak_1039	0.7975	0.930029	59.81
MACS_peak_1039	chr15-54218469-54218869	9.42769	-1.81004	0.281424	chr15	54218372	54218872	MACS_peak_1039	1	0.8	chr15	54218450	54218793	MACS_peak_1039	0.81	0.944606	59.81
MACS_peak_1039	chr15-54218409-54218809	25.1133	-3.00771	0.0787611	chr15	54218372	54218872	MACS_peak_1039	1	0.8	chr15	54218450	54218793	MACS_peak_1039	0.8575	1	59.81
MACS_peak_1042	chr15-54428355-54428755	8432.54	0.00813996	0.993516	chr15	54428263	54428763	MACS_peak_1042	1	0.8	chr15	54428434	54428592	MACS_peak_1042	0.395	1	62.84
MACS_peak_1042	chr15-54428167-54428567	5.77374	-2.05118	0.197471	chr15	54428263	54428763	MACS_peak_1042	0.76	0.608	chr15	54428434	54428592	MACS_peak_1042	0.3325	0.841772	62.84
MACS_peak_1045	chr15-54602167-54602567	10.3786	2.56675	0.135167	chr15	54601986	54602486	MACS_peak_1045	0.7975	0.638	chr15	54602130	54602342	MACS_peak_1045	0.4375	0.825472	67.08
MACS_peak_1045	chr15-54601947-54602347	10.4385	2.08764	0.291887	chr15	54601986	54602486	MACS_peak_1045	0.9025	0.722	chr15	54602130	54602342	MACS_peak_1045	0.53	1	67.08
MACS_peak_1045	chr15-54602166-54602566	10.5863	1.661	0.335532	chr15	54601986	54602486	MACS_peak_1045	0.8	0.64	chr15	54602130	54602342	MACS_peak_1045	0.44	0.830189	67.08
MACS_peak_1045	chr15-54601865-54602265	7.93212	0.0936545	0.970463	chr15	54601986	54602486	MACS_peak_1045	0.6975	0.558	chr15	54602130	54602342	MACS_peak_1045	0.3375	0.636792	67.08
MACS_peak_1045	chr15-54601861-54602261	6.53474	-0.711912	0.725597	chr15	54601986	54602486	MACS_peak_1045	0.6875	0.55	chr15	54602130	54602342	MACS_peak_1045	0.3275	0.617925	67.08
MACS_peak_1045	chr15-54601945-54602345	10.3019	-0.784202	0.710555	chr15	54601986	54602486	MACS_peak_1045	0.8975	0.718	chr15	54602130	54602342	MACS_peak_1045	0.53	1	67.08
MACS_peak_1045	chr15-54602145-54602545	13.7793	-1.062	0.592864	chr15	54601986	54602486	MACS_peak_1045	0.8525	0.682	chr15	54602130	54602342	MACS_peak_1045	0.4925	0.929245	67.08
MACS_peak_1045	chr15-54602164-54602564	15.995	-1.14851	0.498786	chr15	54601986	54602486	MACS_peak_1045	0.805	0.644	chr15	54602130	54602342	MACS_peak_1045	0.445	0.839623	67.08
MACS_peak_1045	chr15-54602165-54602565	12.0718	-1.17958	0.579265	chr15	54601986	54602486	MACS_peak_1045	0.8025	0.642	chr15	54602130	54602342	MACS_peak_1045	0.4425	0.834906	67.08
MACS_peak_1050	chr15-55650893-55651293	5.79392	2.83173	0.0994549	chr15	55650805	55651305	MACS_peak_1050	1	0.8	chr15	55650871	55651239	MACS_peak_1050	0.865	0.940217	66.09
MACS_peak_1050	chr15-55650866-55651266	50.0596	1.13981	0.618406	chr15	55650805	55651305	MACS_peak_1050	1	0.8	chr15	55650871	55651239	MACS_peak_1050	0.92	1	66.09
MACS_peak_1050	chr15-55650894-55651294	6.60979	1.065	0.579265	chr15	55650805	55651305	MACS_peak_1050	1	0.8	chr15	55650871	55651239	MACS_peak_1050	0.8625	0.9375	66.09
MACS_peak_1050	chr15-55650864-55651264	27.9217	0.162075	0.970463	chr15	55650805	55651305	MACS_peak_1050	1	0.8	chr15	55650871	55651239	MACS_peak_1050	0.92	1	66.09
MACS_peak_1050	chr15-55650895-55651295	6.95472	-0.470527	0.842995	chr15	55650805	55651305	MACS_peak_1050	1	0.8	chr15	55650871	55651239	MACS_peak_1050	0.86	0.934783	66.09
MACS_peak_1050	chr15-55650847-55651247	17.1719	-3.24231	0.0578981	chr15	55650805	55651305	MACS_peak_1050	1	0.8	chr15	55650871	55651239	MACS_peak_1050	0.92	1	66.09
MACS_peak_1050	chr15-55650865-55651265	9.98471	-3.50737	0.0534783	chr15	55650805	55651305	MACS_peak_1050	1	0.8	chr15	55650871	55651239	MACS_peak_1050	0.92	1	66.09
MACS_peak_1053	chr15-56497168-56497568	86.011	6.11639	6.22581e-07	chr15	56497151	56497651	MACS_peak_1053	1	0.8	chr15	56497195	56497606	MACS_peak_1053	0.9325	0.907543	138.49
MACS_peak_1053	chr15-56497192-56497592	29.0009	4.35782	0.00562275	chr15	56497151	56497651	MACS_peak_1053	1	0.8	chr15	56497195	56497606	MACS_peak_1053	0.9925	0.965937	138.49
MACS_peak_1053	chr15-56497321-56497721	833.084	2.61787	0.0157572	chr15	56497151	56497651	MACS_peak_1053	0.825	0.66	chr15	56497195	56497606	MACS_peak_1053	0.7125	0.693431	138.49
MACS_peak_1053	chr15-56497215-56497615	25.6497	3.12858	0.0534783	chr15	56497151	56497651	MACS_peak_1053	1	0.8	chr15	56497195	56497606	MACS_peak_1053	0.9775	0.951338	138.49
MACS_peak_1053	chr15-56497145-56497545	6.02577	3.06077	0.0854051	chr15	56497151	56497651	MACS_peak_1053	0.985	0.788	chr15	56497195	56497606	MACS_peak_1053	0.875	0.851582	138.49
MACS_peak_1053	chr15-56497143-56497543	827.095	2.87243	0.096791	chr15	56497151	56497651	MACS_peak_1053	0.98	0.784	chr15	56497195	56497606	MACS_peak_1053	0.87	0.846715	138.49
MACS_peak_1053	chr15-56497230-56497630	3167.84	2.73904	0.0552306	chr15	56497151	56497651	MACS_peak_1053	1	0.8	chr15	56497195	56497606	MACS_peak_1053	0.94	0.914842	138.49
MACS_peak_1053	chr15-56497320-56497720	546.842	2.67481	0.0508492	chr15	56497151	56497651	MACS_peak_1053	0.8275	0.662	chr15	56497195	56497606	MACS_peak_1053	0.715	0.695864	138.49
MACS_peak_1053	chr15-56497319-56497719	677.624	2.60627	0.101355	chr15	56497151	56497651	MACS_peak_1053	0.83	0.664	chr15	56497195	56497606	MACS_peak_1053	0.7175	0.698297	138.49
MACS_peak_1053	chr15-56497160-56497560	32.6949	2.25225	0.125343	chr15	56497151	56497651	MACS_peak_1053	1	0.8	chr15	56497195	56497606	MACS_peak_1053	0.9125	0.888078	138.49
MACS_peak_1053	chr15-56497101-56497501	14.1933	2.25206	0.153593	chr15	56497151	56497651	MACS_peak_1053	0.875	0.7	chr15	56497195	56497606	MACS_peak_1053	0.765	0.744526	138.49
MACS_peak_1053	chr15-56497161-56497561	25.5311	2.17156	0.1842	chr15	56497151	56497651	MACS_peak_1053	1	0.8	chr15	56497195	56497606	MACS_peak_1053	0.915	0.890511	138.49
MACS_peak_1053	chr15-56497191-56497591	21.2379	2.02093	0.225849	chr15	56497151	56497651	MACS_peak_1053	1	0.8	chr15	56497195	56497606	MACS_peak_1053	0.99	0.963504	138.49
MACS_peak_1053	chr15-56497231-56497631	756.511	1.88545	0.332598	chr15	56497151	56497651	MACS_peak_1053	1	0.8	chr15	56497195	56497606	MACS_peak_1053	0.9375	0.912409	138.49
MACS_peak_1053	chr15-56497312-56497712	48.3081	1.88314	0.345884	chr15	56497151	56497651	MACS_peak_1053	0.8475	0.678	chr15	56497195	56497606	MACS_peak_1053	0.735	0.715328	138.49
MACS_peak_1053	chr15-56497318-56497718	394.093	1.82299	0.324096	chr15	56497151	56497651	MACS_peak_1053	0.8325	0.666	chr15	56497195	56497606	MACS_peak_1053	0.72	0.70073	138.49
MACS_peak_1053	chr15-56497159-56497559	59.8933	1.80174	0.288615	chr15	56497151	56497651	MACS_peak_1053	1	0.8	chr15	56497195	56497606	MACS_peak_1053	0.91	0.885645	138.49
MACS_peak_1053	chr15-56497162-56497562	15.6893	1.64503	0.373836	chr15	56497151	56497651	MACS_peak_1053	1	0.8	chr15	56497195	56497606	MACS_peak_1053	0.9175	0.892944	138.49
MACS_peak_1053	chr15-56497228-56497628	1102.39	1.38449	0.318309	chr15	56497151	56497651	MACS_peak_1053	1	0.8	chr15	56497195	56497606	MACS_peak_1053	0.945	0.919708	138.49
MACS_peak_1053	chr15-56497189-56497589	28.5772	1.2147	0.492354	chr15	56497151	56497651	MACS_peak_1053	1	0.8	chr15	56497195	56497606	MACS_peak_1053	0.985	0.958637	138.49
MACS_peak_1053	chr15-56497163-56497563	28.1814	1.21389	0.474491	chr15	56497151	56497651	MACS_peak_1053	1	0.8	chr15	56497195	56497606	MACS_peak_1053	0.92	0.895377	138.49
MACS_peak_1053	chr15-56497190-56497590	15.4685	1.19217	0.485472	chr15	56497151	56497651	MACS_peak_1053	1	0.8	chr15	56497195	56497606	MACS_peak_1053	0.9875	0.961071	138.49
MACS_peak_1053	chr15-56497141-56497541	306.581	1.17021	0.511937	chr15	56497151	56497651	MACS_peak_1053	0.975	0.78	chr15	56497195	56497606	MACS_peak_1053	0.865	0.841849	138.49
MACS_peak_1053	chr15-56497229-56497629	26.511	1.01457	0.575367	chr15	56497151	56497651	MACS_peak_1053	1	0.8	chr15	56497195	56497606	MACS_peak_1053	0.9425	0.917275	138.49
MACS_peak_1053	chr15-56497158-56497558	73.8291	0.958922	0.594321	chr15	56497151	56497651	MACS_peak_1053	1	0.8	chr15	56497195	56497606	MACS_peak_1053	0.9075	0.883212	138.49
MACS_peak_1053	chr15-56497142-56497542	158.88	0.855931	0.607733	chr15	56497151	56497651	MACS_peak_1053	0.9775	0.782	chr15	56497195	56497606	MACS_peak_1053	0.8675	0.844282	138.49
MACS_peak_1053	chr15-56497100-56497500	9.0225	0.824105	0.742851	chr15	56497151	56497651	MACS_peak_1053	0.8725	0.698	chr15	56497195	56497606	MACS_peak_1053	0.7625	0.742092	138.49
MACS_peak_1053	chr15-56497099-56497499	19.4597	-0.0218111	0.989544	chr15	56497151	56497651	MACS_peak_1053	0.87	0.696	chr15	56497195	56497606	MACS_peak_1053	0.76	0.739659	138.49
MACS_peak_1058	chr15-56719492-56719892	7.96713	2.24407	0.216423	chr15	56719299	56719799	MACS_peak_1058	0.7675	0.614	chr15	56719388	56719709	MACS_peak_1058	0.5425	0.676012	63.25
MACS_peak_1058	chr15-56719490-56719890	6.57259	0.61004	0.79829	chr15	56719299	56719799	MACS_peak_1058	0.7725	0.618	chr15	56719388	56719709	MACS_peak_1058	0.5475	0.682243	63.25
MACS_peak_1059	chr15-56922761-56923161	166.299	4.10356	0.000666307	chr15	56922700	56923200	MACS_peak_1059	1	0.8	chr15	56922717	56923182	MACS_peak_1059	1	0.860215	137.74
MACS_peak_1059	chr15-56922789-56923189	7.90405	-0.638266	0.765138	chr15	56922700	56923200	MACS_peak_1059	1	0.8	chr15	56922717	56923182	MACS_peak_1059	0.9825	0.845161	137.74
MACS_peak_1059	chr15-56922790-56923190	5.68194	-2.84766	0.0994549	chr15	56922700	56923200	MACS_peak_1059	1	0.8	chr15	56922717	56923182	MACS_peak_1059	0.98	0.843011	137.74
MACS_peak_1061	chr15-56983541-56983941	7.37168	-0.0807433	0.970463	chr15	56983385	56983885	MACS_peak_1061	0.86	0.688	chr15	56983558	56983712	MACS_peak_1061	0.385	1	81.01
MACS_peak_1061	chr15-56983539-56983939	10.2002	-0.509525	0.830228	chr15	56983385	56983885	MACS_peak_1061	0.865	0.692	chr15	56983558	56983712	MACS_peak_1061	0.385	1	81.01
MACS_peak_1061	chr15-56983510-56983910	15.3406	-0.93452	0.680967	chr15	56983385	56983885	MACS_peak_1061	0.9375	0.75	chr15	56983558	56983712	MACS_peak_1061	0.385	1	81.01
MACS_peak_1061	chr15-56983540-56983940	9.16933	-0.976091	0.680065	chr15	56983385	56983885	MACS_peak_1061	0.8625	0.69	chr15	56983558	56983712	MACS_peak_1061	0.385	1	81.01
MACS_peak_1061	chr15-56983542-56983942	12.6984	-1.35993	0.529477	chr15	56983385	56983885	MACS_peak_1061	0.8575	0.686	chr15	56983558	56983712	MACS_peak_1061	0.385	1	81.01
MACS_peak_1065	chr15-60351389-60351789	17.1779	1.68234	0.28905	chr15	60351229	60351729	MACS_peak_1065	0.85	0.68	chr15	60351339	60351618	MACS_peak_1065	0.5725	0.820789	96.99
MACS_peak_1065	chr15-60351391-60351791	23.8939	1.39582	0.393449	chr15	60351229	60351729	MACS_peak_1065	0.845	0.676	chr15	60351339	60351618	MACS_peak_1065	0.5675	0.81362	96.99
MACS_peak_1065	chr15-60351390-60351790	19.0313	1.02523	0.582378	chr15	60351229	60351729	MACS_peak_1065	0.8475	0.678	chr15	60351339	60351618	MACS_peak_1065	0.57	0.817204	96.99
MACS_peak_1065	chr15-60351158-60351558	8.87863	-0.487866	0.85658	chr15	60351229	60351729	MACS_peak_1065	0.8225	0.658	chr15	60351339	60351618	MACS_peak_1065	0.5475	0.784946	96.99
MACS_peak_1071	chr15-64448711-64449111	9.20495	-0.558906	0.85658	chr15	64448779	64449279	MACS_peak_1071	0.83	0.664	chr15	64448925	64449133	MACS_peak_1071	0.465	0.894231	119.79
MACS_peak_1071	chr15-64448706-64449106	157.983	-0.984353	0.552046	chr15	64448779	64449279	MACS_peak_1071	0.8175	0.654	chr15	64448925	64449133	MACS_peak_1071	0.4525	0.870192	119.79
MACS_peak_1071	chr15-64448708-64449108	350.425	-1.94632	0.071933	chr15	64448779	64449279	MACS_peak_1071	0.8225	0.658	chr15	64448925	64449133	MACS_peak_1071	0.4575	0.879808	119.79
MACS_peak_1071	chr15-64448707-64449107	20.0244	-2.02209	0.198367	chr15	64448779	64449279	MACS_peak_1071	0.82	0.656	chr15	64448925	64449133	MACS_peak_1071	0.455	0.875	119.79
MACS_peak_1072	chr15-64452000-64452400	5561.15	-0.339323	0.832306	chr15	64452087	64452587	MACS_peak_1072	0.7825	0.626	chr15	64452269	64452404	MACS_peak_1072	0.3275	0.97037	108.52
MACS_peak_1072	chr15-64452015-64452415	6.96671	-1.90838	0.256836	chr15	64452087	64452587	MACS_peak_1072	0.82	0.656	chr15	64452269	64452404	MACS_peak_1072	0.3375	1	108.52
MACS_peak_1077	chr15-67587404-67587804	9.31338	0.133353	0.970463	chr15	67587285	67587785	MACS_peak_1077	0.9525	0.762	chr15	67587425	67587645	MACS_peak_1077	0.55	1	64.78
MACS_peak_1077	chr15-67587406-67587806	21.1598	-1.27329	0.3971	chr15	67587285	67587785	MACS_peak_1077	0.9475	0.758	chr15	67587425	67587645	MACS_peak_1077	0.55	1	64.78
MACS_peak_1077	chr15-67587405-67587805	13.019	-1.2788	0.56893	chr15	67587285	67587785	MACS_peak_1077	0.95	0.76	chr15	67587425	67587645	MACS_peak_1077	0.55	1	64.78
MACS_peak_1077	chr15-67587403-67587803	12.4911	-1.32554	0.542844	chr15	67587285	67587785	MACS_peak_1077	0.955	0.764	chr15	67587425	67587645	MACS_peak_1077	0.55	1	64.78
MACS_peak_1079	chr15-71351617-71352017	138.922	1.25602	0.368297	chr15	71351629	71352129	MACS_peak_1079	0.97	0.776	chr15	71351778	71351980	MACS_peak_1079	0.505	1	80.84
MACS_peak_1079	chr15-71351714-71352114	8.45127	0.382101	0.908826	chr15	71351629	71352129	MACS_peak_1079	1	0.8	chr15	71351778	71351980	MACS_peak_1079	0.505	1	80.84
MACS_peak_1079	chr15-71351716-71352116	10.1343	-2.21279	0.183837	chr15	71351629	71352129	MACS_peak_1079	1	0.8	chr15	71351778	71351980	MACS_peak_1079	0.505	1	80.84
MACS_peak_1080	chr15-71656510-71656910	8.74835	2.80955	0.0994549	chr15	71656383	71656883	MACS_peak_1080	0.9325	0.746	chr15	71656431	71656835	MACS_peak_1080	0.8125	0.804455	76
MACS_peak_1080	chr15-71656357-71656757	23.3234	1.71404	0.32268	chr15	71656383	71656883	MACS_peak_1080	0.935	0.748	chr15	71656431	71656835	MACS_peak_1080	0.815	0.806931	76
MACS_peak_1080	chr15-71656355-71656755	31.8251	0.926951	0.587799	chr15	71656383	71656883	MACS_peak_1080	0.93	0.744	chr15	71656431	71656835	MACS_peak_1080	0.81	0.80198	76
MACS_peak_1080	chr15-71656511-71656911	32.3577	0.37721	0.874634	chr15	71656383	71656883	MACS_peak_1080	0.93	0.744	chr15	71656431	71656835	MACS_peak_1080	0.81	0.80198	76
MACS_peak_1080	chr15-71656509-71656909	11.8238	0.161401	0.970463	chr15	71656383	71656883	MACS_peak_1080	0.935	0.748	chr15	71656431	71656835	MACS_peak_1080	0.815	0.806931	76
MACS_peak_1083	chr15-72499043-72499443	17.578	3.55063	0.0534783	chr15	72498962	72499462	MACS_peak_1083	1	0.8	chr15	72499035	72499388	MACS_peak_1083	0.8625	0.977337	87.95
MACS_peak_1083	chr15-72499044-72499444	97.0735	-0.789137	0.772216	chr15	72498962	72499462	MACS_peak_1083	1	0.8	chr15	72499035	72499388	MACS_peak_1083	0.86	0.974504	87.95
MACS_peak_1083	chr15-72499045-72499445	6.57706	-1.54994	0.438273	chr15	72498962	72499462	MACS_peak_1083	1	0.8	chr15	72499035	72499388	MACS_peak_1083	0.8575	0.971671	87.95
MACS_peak_1083	chr15-72499046-72499446	34.0571	-1.65744	0.211277	chr15	72498962	72499462	MACS_peak_1083	1	0.8	chr15	72499035	72499388	MACS_peak_1083	0.855	0.968839	87.95
MACS_peak_1083	chr15-72499050-72499450	5.68194	-2.84766	0.0994549	chr15	72498962	72499462	MACS_peak_1083	1	0.8	chr15	72499035	72499388	MACS_peak_1083	0.845	0.957507	87.95
MACS_peak_1085	chr15-72511051-72511451	5313.53	-0.284614	0.925237	chr15	72511087	72511587	MACS_peak_1085	0.91	0.728	chr15	72511253	72511421	MACS_peak_1085	0.42	1	105.94
MACS_peak_1085	chr15-72511053-72511453	5569.94	-1.4464	0.0693566	chr15	72511087	72511587	MACS_peak_1085	0.915	0.732	chr15	72511253	72511421	MACS_peak_1085	0.42	1	105.94
MACS_peak_109	chr1-111756853-111757253	134.91	6.50634	4.05281e-08	chr1	111756838	111757338	MACS_peak_109	1	0.8	chr1	111757005	111757171	MACS_peak_109	0.415	1	74.77
MACS_peak_109	chr1-111756851-111757251	258.409	2.91782	0.0421454	chr1	111756838	111757338	MACS_peak_109	1	0.8	chr1	111757005	111757171	MACS_peak_109	0.415	1	74.77
MACS_peak_109	chr1-111756850-111757250	15.0741	0.258071	0.949285	chr1	111756838	111757338	MACS_peak_109	1	0.8	chr1	111757005	111757171	MACS_peak_109	0.415	1	74.77
MACS_peak_109	chr1-111756852-111757252	43.7267	0.232328	0.938623	chr1	111756838	111757338	MACS_peak_109	1	0.8	chr1	111757005	111757171	MACS_peak_109	0.415	1	74.77
MACS_peak_109	chr1-111756772-111757172	10.813	-1.09157	0.6032	chr1	111756838	111757338	MACS_peak_109	0.835	0.668	chr1	111757005	111757171	MACS_peak_109	0.415	1	74.77
MACS_peak_1092	chr15-80295524-80295924	32.2347	2.80564	0.0854051							chr15	80295437	80295741	MACS_peak_1092	0.5425	0.713816	79.83
MACS_peak_1092	chr15-80295526-80295926	24.024	1.40777	0.367167							chr15	80295437	80295741	MACS_peak_1092	0.5375	0.707237	79.83
MACS_peak_1092	chr15-80295525-80295925	24.0717	-0.231736	0.970463							chr15	80295437	80295741	MACS_peak_1092	0.54	0.710526	79.83
MACS_peak_1093	chr15-80777641-80778041	15.3313	3.63715	0.0421454	chr15	80777552	80778052	MACS_peak_1093	1	0.8	chr15	80777526	80778078	MACS_peak_1093	1	0.724638	96.26
MACS_peak_1093	chr15-80777639-80778039	25.0232	3.49757	0.029172	chr15	80777552	80778052	MACS_peak_1093	1	0.8	chr15	80777526	80778078	MACS_peak_1093	1	0.724638	96.26
MACS_peak_1093	chr15-80777472-80777872	6.02577	3.06077	0.0854051	chr15	80777552	80778052	MACS_peak_1093	0.8	0.64	chr15	80777526	80778078	MACS_peak_1093	0.865	0.626812	96.26
MACS_peak_1093	chr15-80777638-80778038	15.0936	1.1233	0.522273	chr15	80777552	80778052	MACS_peak_1093	1	0.8	chr15	80777526	80778078	MACS_peak_1093	1	0.724638	96.26
MACS_peak_1093	chr15-80777637-80778037	30.6741	1.02368	0.582497	chr15	80777552	80778052	MACS_peak_1093	1	0.8	chr15	80777526	80778078	MACS_peak_1093	1	0.724638	96.26
MACS_peak_1095	chr15-83410885-83411285	151.287	2.30007	0.0994549	chr15	83410743	83411243	MACS_peak_1095	0.895	0.716	chr15	83410876	83411109	MACS_peak_1095	0.56	0.961373	60.21
MACS_peak_1095	chr15-83410805-83411205	1216.03	1.5182	0.250119	chr15	83410743	83411243	MACS_peak_1095	1	0.8	chr15	83410876	83411109	MACS_peak_1095	0.5825	1	60.21
MACS_peak_1095	chr15-83410886-83411286	79.0342	1.50685	0.196217	chr15	83410743	83411243	MACS_peak_1095	0.8925	0.714	chr15	83410876	83411109	MACS_peak_1095	0.5575	0.957082	60.21
MACS_peak_1095	chr15-83410887-83411287	492.416	1.46306	0.19795	chr15	83410743	83411243	MACS_peak_1095	0.89	0.712	chr15	83410876	83411109	MACS_peak_1095	0.555	0.95279	60.21
MACS_peak_1095	chr15-83410807-83411207	372.153	0.94101	0.478394	chr15	83410743	83411243	MACS_peak_1095	1	0.8	chr15	83410876	83411109	MACS_peak_1095	0.5825	1	60.21
MACS_peak_1095	chr15-83410806-83411206	111.748	-0.0442596	0.97578	chr15	83410743	83411243	MACS_peak_1095	1	0.8	chr15	83410876	83411109	MACS_peak_1095	0.5825	1	60.21
MACS_peak_1095	chr15-83410926-83411326	18.0902	-0.327427	0.913463	chr15	83410743	83411243	MACS_peak_1095	0.7925	0.634	chr15	83410876	83411109	MACS_peak_1095	0.4575	0.785408	60.21
MACS_peak_110	chr1-111757192-111757592	10.838	3.99606	0.0142162	chr1	111756838	111757338	MACS_peak_109	0.365	0.292	chr1	111757216	111757428	MACS_peak_110	0.53	1	54.47
MACS_peak_110	chr1-111757193-111757593	71.4435	3.55361	0.00826739	chr1	111756838	111757338	MACS_peak_109	0.3625	0.29	chr1	111757216	111757428	MACS_peak_110	0.53	1	54.47
MACS_peak_110	chr1-111757142-111757542	15.0717	2.99858	0.0994549	chr1	111756838	111757338	MACS_peak_109	0.49	0.392	chr1	111757216	111757428	MACS_peak_110	0.53	1	54.47
MACS_peak_110	chr1-111757170-111757570	12.7888	2.03616	0.185261	chr1	111756838	111757338	MACS_peak_109	0.42	0.336	chr1	111757216	111757428	MACS_peak_110	0.53	1	54.47
MACS_peak_110	chr1-111757163-111757563	9.96239	1.69195	0.30632	chr1	111756838	111757338	MACS_peak_109	0.4375	0.35	chr1	111757216	111757428	MACS_peak_110	0.53	1	54.47
MACS_peak_110	chr1-111757172-111757572	20.1137	1.29097	0.432485	chr1	111756838	111757338	MACS_peak_109	0.415	0.332	chr1	111757216	111757428	MACS_peak_110	0.53	1	54.47
MACS_peak_110	chr1-111757165-111757565	12.34	0.592609	0.784516	chr1	111756838	111757338	MACS_peak_109	0.4325	0.346	chr1	111757216	111757428	MACS_peak_110	0.53	1	54.47
MACS_peak_110	chr1-111757162-111757562	14.8968	0.0902722	0.970463	chr1	111756838	111757338	MACS_peak_109	0.44	0.352	chr1	111757216	111757428	MACS_peak_110	0.53	1	54.47
MACS_peak_110	chr1-111757171-111757571	13.1788	-2.28514	0.194093	chr1	111756838	111757338	MACS_peak_109	0.4175	0.334	chr1	111757216	111757428	MACS_peak_110	0.53	1	54.47
MACS_peak_1102	chr15-93492931-93493331	116.833	5.909	0.000200517	chr15	93493032	93493532	MACS_peak_1102	0.7475	0.598	chr15	93493078	93493485	MACS_peak_1102	0.6325	0.621622	105.02
MACS_peak_1102	chr15-93493120-93493520	39.7352	4.66224	0.00330399	chr15	93493032	93493532	MACS_peak_1102	1	0.8	chr15	93493078	93493485	MACS_peak_1102	0.9125	0.896806	105.02
MACS_peak_1102	chr15-93493121-93493521	29.0009	4.35782	0.00562275	chr15	93493032	93493532	MACS_peak_1102	1	0.8	chr15	93493078	93493485	MACS_peak_1102	0.91	0.894349	105.02
MACS_peak_1102	chr15-93493187-93493587	59.1605	2.76947	0.0495916	chr15	93493032	93493532	MACS_peak_1102	0.8625	0.69	chr15	93493078	93493485	MACS_peak_1102	0.745	0.732187	105.02
MACS_peak_1102	chr15-93493186-93493586	39.4315	3.08427	0.0534783	chr15	93493032	93493532	MACS_peak_1102	0.865	0.692	chr15	93493078	93493485	MACS_peak_1102	0.7475	0.734644	105.02
MACS_peak_1102	chr15-93492929-93493329	216.654	2.81444	0.0534783	chr15	93493032	93493532	MACS_peak_1102	0.7425	0.594	chr15	93493078	93493485	MACS_peak_1102	0.6275	0.616708	105.02
MACS_peak_1102	chr15-93493185-93493585	69.4291	2.79237	0.0536148	chr15	93493032	93493532	MACS_peak_1102	0.8675	0.694	chr15	93493078	93493485	MACS_peak_1102	0.75	0.737101	105.02
MACS_peak_1102	chr15-93493122-93493522	17.3182	2.09555	0.18128	chr15	93493032	93493532	MACS_peak_1102	1	0.8	chr15	93493078	93493485	MACS_peak_1102	0.9075	0.891892	105.02
MACS_peak_1102	chr15-93492930-93493330	45.1903	0.636212	0.830441	chr15	93493032	93493532	MACS_peak_1102	0.745	0.596	chr15	93493078	93493485	MACS_peak_1102	0.63	0.619165	105.02
MACS_peak_1103	chr15-94177310-94177710	19.6365	0.0351077	0.983432	chr15	94177355	94177855	MACS_peak_1103	0.8875	0.71	chr15	94177510	94177699	MACS_peak_1103	0.4725	1	67.96
MACS_peak_111	chr1-111907273-111907673	7.26583	1.49882	0.413016	chr1	111907528	111908028	MACS_peak_112	0.3625	0.29	chr1	111907180	111907498	MACS_peak_111	0.5625	0.707547	106.13
MACS_peak_1110	chr15-98982168-98982568	5.68194	-2.84766	0.0994549	chr15	98981968	98982468	MACS_peak_1110	0.75	0.6	chr15	98982124	98982312	MACS_peak_1110	0.36	0.765957	61.72
MACS_peak_112	chr1-111907471-111907871	31.6471	4.43529	0.0133198	chr1	111907528	111908028	MACS_peak_112	0.8575	0.686	chr1	111907511	111908045	MACS_peak_112	0.9	0.674157	209.95
MACS_peak_112	chr1-111907475-111907875	41.4567	3.3584	0.0236728	chr1	111907528	111908028	MACS_peak_112	0.8675	0.694	chr1	111907511	111908045	MACS_peak_112	0.91	0.681648	209.95
MACS_peak_112	chr1-111907474-111907874	11.0229	3.18414	0.0534783	chr1	111907528	111908028	MACS_peak_112	0.865	0.692	chr1	111907511	111908045	MACS_peak_112	0.9075	0.679775	209.95
MACS_peak_112	chr1-111907473-111907873	12.037	3.18269	0.0534783	chr1	111907528	111908028	MACS_peak_112	0.8625	0.69	chr1	111907511	111908045	MACS_peak_112	0.905	0.677903	209.95
MACS_peak_112	chr1-111907472-111907872	10.4385	2.08764	0.291887	chr1	111907528	111908028	MACS_peak_112	0.86	0.688	chr1	111907511	111908045	MACS_peak_112	0.9025	0.67603	209.95
MACS_peak_1125	chr16-4190704-4191104	11.9662	1.54073	0.341293	chr16	4190589	4191089	MACS_peak_1125	0.9625	0.77	chr16	4190561	4191117	MACS_peak_1125	1	0.719424	781.79
MACS_peak_1125	chr16-4190702-4191102	13.6088	0.396764	0.863467	chr16	4190589	4191089	MACS_peak_1125	0.9675	0.774	chr16	4190561	4191117	MACS_peak_1125	1	0.719424	781.79
MACS_peak_1125	chr16-4190703-4191103	9.68585	0.290732	0.937682	chr16	4190589	4191089	MACS_peak_1125	0.965	0.772	chr16	4190561	4191117	MACS_peak_1125	1	0.719424	781.79
MACS_peak_1126	chr16-4675967-4676367	7.93212	0.0936545	0.970463	chr16	4675782	4676282	MACS_peak_1126	0.7875	0.63	chr16	4675859	4676205	MACS_peak_1126	0.595	0.687861	66.83
MACS_peak_1126	chr16-4675961-4676361	5.68194	-2.84766	0.0994549	chr16	4675782	4676282	MACS_peak_1126	0.8025	0.642	chr16	4675859	4676205	MACS_peak_1126	0.61	0.705202	66.83
MACS_peak_1127	chr16-5455864-5456264	15.6717	4.53278	0.00302908	chr16	5455671	5456171	MACS_peak_1127	0.7675	0.614	chr16	5455749	5456093	MACS_peak_1127	0.5725	0.665698	170.39
MACS_peak_1127	chr16-5455863-5456263	12.825	3.07472	0.0994549	chr16	5455671	5456171	MACS_peak_1127	0.77	0.616	chr16	5455749	5456093	MACS_peak_1127	0.575	0.668605	170.39
MACS_peak_1127	chr16-5455861-5456261	18.7701	1.58987	0.352535	chr16	5455671	5456171	MACS_peak_1127	0.775	0.62	chr16	5455749	5456093	MACS_peak_1127	0.58	0.674419	170.39
MACS_peak_1127	chr16-5455860-5456260	14.8797	1.44148	0.368359	chr16	5455671	5456171	MACS_peak_1127	0.7775	0.622	chr16	5455749	5456093	MACS_peak_1127	0.5825	0.677326	170.39
MACS_peak_1127	chr16-5455862-5456262	11.4481	1.28931	0.483358	chr16	5455671	5456171	MACS_peak_1127	0.7725	0.618	chr16	5455749	5456093	MACS_peak_1127	0.5775	0.671512	170.39
MACS_peak_1127	chr16-5455701-5456101	5.69657	0.61132	0.790629	chr16	5455671	5456171	MACS_peak_1127	1	0.8	chr16	5455749	5456093	MACS_peak_1127	0.86	1	170.39
MACS_peak_1127	chr16-5455597-5455997	96.9005	0.083912	0.970463	chr16	5455671	5456171	MACS_peak_1127	0.815	0.652	chr16	5455749	5456093	MACS_peak_1127	0.62	0.72093	170.39
MACS_peak_1133	chr16-12632264-12632664	129.851	1.44345	0.323891	chr16	12632258	12632758	MACS_peak_1133	1	0.8	chr16	12632381	12632635	MACS_peak_1133	0.635	1	66.86
MACS_peak_1133	chr16-12632262-12632662	273.029	0.2721	0.895157	chr16	12632258	12632758	MACS_peak_1133	1	0.8	chr16	12632381	12632635	MACS_peak_1133	0.635	1	66.86
MACS_peak_1133	chr16-12632263-12632663	233.633	0.227982	0.911803	chr16	12632258	12632758	MACS_peak_1133	1	0.8	chr16	12632381	12632635	MACS_peak_1133	0.635	1	66.86
MACS_peak_1133	chr16-12632137-12632537	28.7137	0.0905646	0.970463	chr16	12632258	12632758	MACS_peak_1133	0.6975	0.558	chr16	12632381	12632635	MACS_peak_1133	0.39	0.614173	66.86
MACS_peak_1139	chr16-23790665-23791065	11.8101	-1.83471	0.331911	chr16	23790739	23791239	MACS_peak_1139	0.815	0.652	chr16	23790900	23791078	MACS_peak_1139	0.4125	0.926966	64.17
MACS_peak_1141	chr16-24393057-24393457	82.6385	5.50668	2.68761e-05	chr16	24392956	24393456	MACS_peak_1141	0.9975	0.798	chr16	24393083	24393329	MACS_peak_1141	0.615	1	64
MACS_peak_1141	chr16-24393002-24393402	103.569	4.95887	1.07859e-05	chr16	24392956	24393456	MACS_peak_1141	1	0.8	chr16	24393083	24393329	MACS_peak_1141	0.615	1	64
MACS_peak_1141	chr16-24393059-24393459	31.55	3.82374	0.0216191	chr16	24392956	24393456	MACS_peak_1141	0.9925	0.794	chr16	24393083	24393329	MACS_peak_1141	0.615	1	64
MACS_peak_1141	chr16-24393021-24393421	64.4628	3.82344	0.0029239	chr16	24392956	24393456	MACS_peak_1141	1	0.8	chr16	24393083	24393329	MACS_peak_1141	0.615	1	64
MACS_peak_1141	chr16-24393058-24393458	74.6487	3.77392	0.00348329	chr16	24392956	24393456	MACS_peak_1141	0.995	0.796	chr16	24393083	24393329	MACS_peak_1141	0.615	1	64
MACS_peak_1141	chr16-24392974-24393374	72.64	3.2418	0.0217867	chr16	24392956	24393456	MACS_peak_1141	1	0.8	chr16	24393083	24393329	MACS_peak_1141	0.615	1	64
MACS_peak_1141	chr16-24393020-24393420	35.8577	3.05777	0.0420113	chr16	24392956	24393456	MACS_peak_1141	1	0.8	chr16	24393083	24393329	MACS_peak_1141	0.615	1	64
MACS_peak_1141	chr16-24393004-24393404	51.858	2.79687	0.0970662	chr16	24392956	24393456	MACS_peak_1141	1	0.8	chr16	24393083	24393329	MACS_peak_1141	0.615	1	64
MACS_peak_1141	chr16-24392972-24393372	34.1448	2.79608	0.0534783	chr16	24392956	24393456	MACS_peak_1141	1	0.8	chr16	24393083	24393329	MACS_peak_1141	0.615	1	64
MACS_peak_1141	chr16-24393023-24393423	74.8876	2.46979	0.0534783	chr16	24392956	24393456	MACS_peak_1141	1	0.8	chr16	24393083	24393329	MACS_peak_1141	0.615	1	64
MACS_peak_1141	chr16-24393056-24393456	72.8995	2.43964	0.0580702	chr16	24392956	24393456	MACS_peak_1141	1	0.8	chr16	24393083	24393329	MACS_peak_1141	0.615	1	64
MACS_peak_1141	chr16-24392973-24393373	14.1597	2.34644	0.106684	chr16	24392956	24393456	MACS_peak_1141	1	0.8	chr16	24393083	24393329	MACS_peak_1141	0.615	1	64
MACS_peak_1141	chr16-24393022-24393422	54.0755	1.96368	0.17967	chr16	24392956	24393456	MACS_peak_1141	1	0.8	chr16	24393083	24393329	MACS_peak_1141	0.615	1	64
MACS_peak_1142	chr16-25565140-25565540	52.7469	5.44175	0.000144465	chr16	25564987	25565487	MACS_peak_1142	0.8675	0.694	chr16	25564937	25565537	MACS_peak_1142	0.9925	0.661667	231.82
MACS_peak_1142	chr16-25565089-25565489	36.54	4.80134	0.00554993	chr16	25564987	25565487	MACS_peak_1142	0.995	0.796	chr16	25564937	25565537	MACS_peak_1142	1	0.666667	231.82
MACS_peak_1142	chr16-25565090-25565490	8.33164	3.40967	0.0534783	chr16	25564987	25565487	MACS_peak_1142	0.9925	0.794	chr16	25564937	25565537	MACS_peak_1142	1	0.666667	231.82
MACS_peak_1142	chr16-25565141-25565541	32.5474	2.64443	0.0534783	chr16	25564987	25565487	MACS_peak_1142	0.865	0.692	chr16	25564937	25565537	MACS_peak_1142	0.99	0.66	231.82
MACS_peak_1142	chr16-25565091-25565491	12.012	2.37025	0.104648	chr16	25564987	25565487	MACS_peak_1142	0.99	0.792	chr16	25564937	25565537	MACS_peak_1142	1	0.666667	231.82
MACS_peak_1142	chr16-25565092-25565492	13.911	1.8052	0.272953	chr16	25564987	25565487	MACS_peak_1142	0.9875	0.79	chr16	25564937	25565537	MACS_peak_1142	1	0.666667	231.82
MACS_peak_1142	chr16-25565142-25565542	16.4704	1.60071	0.334023	chr16	25564987	25565487	MACS_peak_1142	0.8625	0.69	chr16	25564937	25565537	MACS_peak_1142	0.9875	0.658333	231.82
MACS_peak_1142	chr16-25565093-25565493	19.6045	1.55555	0.326225	chr16	25564987	25565487	MACS_peak_1142	0.985	0.788	chr16	25564937	25565537	MACS_peak_1142	1	0.666667	231.82
MACS_peak_1142	chr16-25565143-25565543	25.1408	1.28686	0.450989	chr16	25564987	25565487	MACS_peak_1142	0.86	0.688	chr16	25564937	25565537	MACS_peak_1142	0.985	0.656667	231.82
MACS_peak_1142	chr16-25564904-25565304	19.7511	1.24812	0.585898	chr16	25564987	25565487	MACS_peak_1142	0.7925	0.634	chr16	25564937	25565537	MACS_peak_1142	0.9175	0.611667	231.82
MACS_peak_1142	chr16-25565039-25565439	7.79055	0.0531488	0.975031	chr16	25564987	25565487	MACS_peak_1142	1	0.8	chr16	25564937	25565537	MACS_peak_1142	1	0.666667	231.82
MACS_peak_1143	chr16-25580226-25580626	346.053	4.76565	0.000328216							chr16	25580363	25580582	MACS_peak_1143	0.5475	1	90.5
MACS_peak_1143	chr16-25580228-25580628	597.517	4.31259	1.31075e-05							chr16	25580363	25580582	MACS_peak_1143	0.5475	1	90.5
MACS_peak_1143	chr16-25580262-25580662	23.3453	4.28564	0.00525708							chr16	25580363	25580582	MACS_peak_1143	0.5475	1	90.5
MACS_peak_1143	chr16-25580227-25580627	148.693	2.62359	0.0312105							chr16	25580363	25580582	MACS_peak_1143	0.5475	1	90.5
MACS_peak_1143	chr16-25580442-25580842	10.5799	3.16396	0.0534783							chr16	25580363	25580582	MACS_peak_1143	0.35	0.639269	90.5
MACS_peak_1143	chr16-25580317-25580717	15.0717	2.99858	0.0994549							chr16	25580363	25580582	MACS_peak_1143	0.5475	1	90.5
MACS_peak_1143	chr16-25580265-25580665	22.2368	2.89505	0.11881							chr16	25580363	25580582	MACS_peak_1143	0.5475	1	90.5
MACS_peak_1143	chr16-25580261-25580661	23.8074	2.56335	0.0820323							chr16	25580363	25580582	MACS_peak_1143	0.5475	1	90.5
MACS_peak_1143	chr16-25580260-25580660	11.5712	2.30419	0.128856							chr16	25580363	25580582	MACS_peak_1143	0.5475	1	90.5
MACS_peak_1143	chr16-25580259-25580659	39.7302	2.28533	0.0859897							chr16	25580363	25580582	MACS_peak_1143	0.5475	1	90.5
MACS_peak_1143	chr16-25580443-25580843	14.116	2.00831	0.199532							chr16	25580363	25580582	MACS_peak_1143	0.3475	0.634703	90.5
MACS_peak_1143	chr16-25580444-25580844	15.7587	1.20901	0.466098							chr16	25580363	25580582	MACS_peak_1143	0.345	0.630137	90.5
MACS_peak_1143	chr16-25580439-25580839	7.93212	0.0936545	0.970463							chr16	25580363	25580582	MACS_peak_1143	0.3575	0.652968	90.5
MACS_peak_1149	chr16-31201534-31201934	25.7963	1.98631	0.286381	chr16	31201378	31201878	MACS_peak_1149	0.86	0.688	chr16	31201373	31201883	MACS_peak_1149	0.8725	0.684314	98.45
MACS_peak_1149	chr16-31201533-31201933	8.38146	0.0933567	0.970463	chr16	31201378	31201878	MACS_peak_1149	0.8625	0.69	chr16	31201373	31201883	MACS_peak_1149	0.875	0.686275	98.45
MACS_peak_1149	chr16-31201500-31201900	56.6817	-0.667438	0.75697	chr16	31201378	31201878	MACS_peak_1149	0.945	0.756	chr16	31201373	31201883	MACS_peak_1149	0.9575	0.75098	98.45
MACS_peak_1149	chr16-31201516-31201916	73.6026	-0.832126	0.719676	chr16	31201378	31201878	MACS_peak_1149	0.905	0.724	chr16	31201373	31201883	MACS_peak_1149	0.9175	0.719608	98.45
MACS_peak_1149	chr16-31201515-31201915	59.5819	-0.838755	0.679237	chr16	31201378	31201878	MACS_peak_1149	0.9075	0.726	chr16	31201373	31201883	MACS_peak_1149	0.92	0.721569	98.45
MACS_peak_1149	chr16-31201517-31201917	62.6464	-0.905161	0.685405	chr16	31201378	31201878	MACS_peak_1149	0.9025	0.722	chr16	31201373	31201883	MACS_peak_1149	0.915	0.717647	98.45
MACS_peak_1149	chr16-31201514-31201914	44.9521	-1.31204	0.331859	chr16	31201378	31201878	MACS_peak_1149	0.91	0.728	chr16	31201373	31201883	MACS_peak_1149	0.9225	0.723529	98.45
MACS_peak_1149	chr16-31201513-31201913	102.028	-1.59504	0.143542	chr16	31201378	31201878	MACS_peak_1149	0.9125	0.73	chr16	31201373	31201883	MACS_peak_1149	0.925	0.72549	98.45
MACS_peak_1149	chr16-31201498-31201898	94.6822	-2.03665	0.0830083	chr16	31201378	31201878	MACS_peak_1149	0.95	0.76	chr16	31201373	31201883	MACS_peak_1149	0.9625	0.754902	98.45
MACS_peak_1149	chr16-31201499-31201899	53.7633	-2.34538	0.0534783	chr16	31201378	31201878	MACS_peak_1149	0.9475	0.758	chr16	31201373	31201883	MACS_peak_1149	0.96	0.752941	98.45
MACS_peak_1149	chr16-31201497-31201897	19.3867	-2.34992	0.236454	chr16	31201378	31201878	MACS_peak_1149	0.9525	0.762	chr16	31201373	31201883	MACS_peak_1149	0.965	0.756863	98.45
MACS_peak_1149	chr16-31201518-31201918	10.1921	-3.54852	0.0534783	chr16	31201378	31201878	MACS_peak_1149	0.9	0.72	chr16	31201373	31201883	MACS_peak_1149	0.9125	0.715686	98.45
MACS_peak_115	chr1-113305637-113306037	10.4385	2.08764	0.291887	chr1	113305606	113306106	MACS_peak_115	1	0.8	chr1	113305588	113306123	MACS_peak_115	1	0.747664	291.09
MACS_peak_115	chr1-113305639-113306039	9.59794	0.661885	0.743316	chr1	113305606	113306106	MACS_peak_115	1	0.8	chr1	113305588	113306123	MACS_peak_115	1	0.747664	291.09
MACS_peak_1150	chr16-31285104-31285504	10.4631	2.57241	0.102774	chr16	31284954	31285454	MACS_peak_1150	0.875	0.7	chr16	31284905	31285503	MACS_peak_1150	0.9975	0.667224	221.24
MACS_peak_1150	chr16-31285109-31285509	8.1918	2.14747	0.26888	chr16	31284954	31285454	MACS_peak_1150	0.8625	0.69	chr16	31284905	31285503	MACS_peak_1150	0.985	0.658863	221.24
MACS_peak_1150	chr16-31285102-31285502	11.6987	1.99199	0.283162	chr16	31284954	31285454	MACS_peak_1150	0.88	0.704	chr16	31284905	31285503	MACS_peak_1150	1	0.668896	221.24
MACS_peak_1150	chr16-31285103-31285503	10.3418	1.84347	0.249651	chr16	31284954	31285454	MACS_peak_1150	0.8775	0.702	chr16	31284905	31285503	MACS_peak_1150	1	0.668896	221.24
MACS_peak_1150	chr16-31285101-31285501	13.6076	1.40171	0.384937	chr16	31284954	31285454	MACS_peak_1150	0.8825	0.706	chr16	31284905	31285503	MACS_peak_1150	1	0.668896	221.24
MACS_peak_1153	chr16-32599935-32600335	6.43022	2.85861	0.0854051	chr16	32599792	32600292	MACS_peak_1153	0.8925	0.714	chr16	32599941	32600143	MACS_peak_1153	0.505	1	68.33
MACS_peak_1153	chr16-32599908-32600308	101.972	0.363841	0.859789	chr16	32599792	32600292	MACS_peak_1153	0.96	0.768	chr16	32599941	32600143	MACS_peak_1153	0.505	1	68.33
MACS_peak_1153	chr16-32599932-32600332	24.3322	0.109192	0.970463	chr16	32599792	32600292	MACS_peak_1153	0.9	0.72	chr16	32599941	32600143	MACS_peak_1153	0.505	1	68.33
MACS_peak_1153	chr16-32599907-32600307	216.235	-0.743306	0.58678	chr16	32599792	32600292	MACS_peak_1153	0.9625	0.77	chr16	32599941	32600143	MACS_peak_1153	0.505	1	68.33
MACS_peak_1153	chr16-32599931-32600331	19.3397	-0.927687	0.616482	chr16	32599792	32600292	MACS_peak_1153	0.9025	0.722	chr16	32599941	32600143	MACS_peak_1153	0.505	1	68.33
MACS_peak_1153	chr16-32599906-32600306	376.568	-1.04893	0.435285	chr16	32599792	32600292	MACS_peak_1153	0.965	0.772	chr16	32599941	32600143	MACS_peak_1153	0.505	1	68.33
MACS_peak_1153	chr16-32599933-32600333	6.65398	-1.64791	0.343683	chr16	32599792	32600292	MACS_peak_1153	0.8975	0.718	chr16	32599941	32600143	MACS_peak_1153	0.505	1	68.33
MACS_peak_116	chr1-114878926-114879326	1221.52	8.34836	1.35585e-15	chr1	114878864	114879364	MACS_peak_116	1	0.8	chr1	114878869	114879358	MACS_peak_116	1	0.817996	78.08
MACS_peak_116	chr1-114878924-114879324	22.201	3.95548	0.0424272	chr1	114878864	114879364	MACS_peak_116	1	0.8	chr1	114878869	114879358	MACS_peak_116	1	0.817996	78.08
MACS_peak_116	chr1-114878830-114879230	11.7017	3.12482	0.0931118	chr1	114878864	114879364	MACS_peak_116	0.915	0.732	chr1	114878869	114879358	MACS_peak_116	0.9025	0.738241	78.08
MACS_peak_116	chr1-114878941-114879341	6.02577	3.06077	0.0854051	chr1	114878864	114879364	MACS_peak_116	1	0.8	chr1	114878869	114879358	MACS_peak_116	1	0.817996	78.08
MACS_peak_116	chr1-114878833-114879233	6.02577	3.06077	0.0854051	chr1	114878864	114879364	MACS_peak_116	0.9225	0.738	chr1	114878869	114879358	MACS_peak_116	0.91	0.744376	78.08
MACS_peak_116	chr1-114878879-114879279	5.8118	2.98528	0.098234	chr1	114878864	114879364	MACS_peak_116	1	0.8	chr1	114878869	114879358	MACS_peak_116	1	0.817996	78.08
MACS_peak_116	chr1-114878834-114879234	6.11923	1.9438	0.229958	chr1	114878864	114879364	MACS_peak_116	0.925	0.74	chr1	114878869	114879358	MACS_peak_116	0.9125	0.746421	78.08
MACS_peak_116	chr1-114878967-114879367	5.81528	1.59546	0.444703	chr1	114878864	114879364	MACS_peak_116	0.9925	0.794	chr1	114878869	114879358	MACS_peak_116	0.9775	0.799591	78.08
MACS_peak_116	chr1-114878969-114879369	364.203	1.44569	0.484554	chr1	114878864	114879364	MACS_peak_116	0.9875	0.79	chr1	114878869	114879358	MACS_peak_116	0.9725	0.795501	78.08
MACS_peak_116	chr1-114878832-114879232	23.1293	1.36785	0.513723	chr1	114878864	114879364	MACS_peak_116	0.92	0.736	chr1	114878869	114879358	MACS_peak_116	0.9075	0.742331	78.08
MACS_peak_116	chr1-114878836-114879236	6.7449	0.672289	0.745557	chr1	114878864	114879364	MACS_peak_116	0.93	0.744	chr1	114878869	114879358	MACS_peak_116	0.9175	0.750511	78.08
MACS_peak_116	chr1-114878831-114879231	12.8316	0.499365	0.866067	chr1	114878864	114879364	MACS_peak_116	0.9175	0.734	chr1	114878869	114879358	MACS_peak_116	0.905	0.740286	78.08
MACS_peak_116	chr1-114879016-114879416	5.53384	-0.51424	0.833392	chr1	114878864	114879364	MACS_peak_116	0.87	0.696	chr1	114878869	114879358	MACS_peak_116	0.855	0.699387	78.08
MACS_peak_116	chr1-114878825-114879225	5.75388	-1.35344	0.507741	chr1	114878864	114879364	MACS_peak_116	0.9025	0.722	chr1	114878869	114879358	MACS_peak_116	0.89	0.728016	78.08
MACS_peak_116	chr1-114878804-114879204	9.77093	-1.62901	0.423191	chr1	114878864	114879364	MACS_peak_116	0.85	0.68	chr1	114878869	114879358	MACS_peak_116	0.8375	0.685072	78.08
MACS_peak_1160	chr16-52248406-52248806	8.59886	-0.825862	0.668616	chr16	52248318	52248818	MACS_peak_1160	1	0.8	chr16	52248498	52248638	MACS_peak_1160	0.35	1	76.07
MACS_peak_1160	chr16-52248502-52248902	7.13126	-1.30519	0.457217	chr16	52248318	52248818	MACS_peak_1160	0.79	0.632	chr16	52248498	52248638	MACS_peak_1160	0.34	0.971429	76.07
MACS_peak_1160	chr16-52248501-52248901	10.3135	-1.77454	0.293986	chr16	52248318	52248818	MACS_peak_1160	0.7925	0.634	chr16	52248498	52248638	MACS_peak_1160	0.3425	0.978571	76.07
MACS_peak_1162	chr16-53086529-53086929	5.68544	0.0955583	0.970463	chr16	53086390	53086890	MACS_peak_1162	0.9025	0.722	chr16	53086493	53086786	MACS_peak_1162	0.6425	0.877133	146.29
MACS_peak_1163	chr16-60022425-60022825	113.686	4.38741	0.00121946	chr16	60022458	60022958	MACS_peak_1163	0.9175	0.734	chr16	60022498	60022918	MACS_peak_1163	0.8175	0.778571	111.01
MACS_peak_1163	chr16-60022421-60022821	8.33164	3.40967	0.0534783	chr16	60022458	60022958	MACS_peak_1163	0.9075	0.726	chr16	60022498	60022918	MACS_peak_1163	0.8075	0.769048	111.01
MACS_peak_1163	chr16-60022427-60022827	109.512	1.95697	0.168761	chr16	60022458	60022958	MACS_peak_1163	0.9225	0.738	chr16	60022498	60022918	MACS_peak_1163	0.8225	0.783333	111.01
MACS_peak_1163	chr16-60022426-60022826	272.627	1.42419	0.418557	chr16	60022458	60022958	MACS_peak_1163	0.92	0.736	chr16	60022498	60022918	MACS_peak_1163	0.82	0.780952	111.01
MACS_peak_1163	chr16-60022446-60022846	254.393	0.0765386	0.972284	chr16	60022458	60022958	MACS_peak_1163	0.97	0.776	chr16	60022498	60022918	MACS_peak_1163	0.87	0.828571	111.01
MACS_peak_1164	chr16-64471723-64472123	561.461	8.70256	5.08605e-11	chr16	64471515	64472015	MACS_peak_1164	0.73	0.584	chr16	64471607	64471922	MACS_peak_1164	0.4975	0.631746	85.05
MACS_peak_1164	chr16-64471676-64472076	723.886	3.4605	0.00562275	chr16	64471515	64472015	MACS_peak_1164	0.8475	0.678	chr16	64471607	64471922	MACS_peak_1164	0.615	0.780952	85.05
MACS_peak_1164	chr16-64471677-64472077	952.586	1.665	0.318863	chr16	64471515	64472015	MACS_peak_1164	0.845	0.676	chr16	64471607	64471922	MACS_peak_1164	0.6125	0.777778	85.05
MACS_peak_1164	chr16-64471678-64472078	1485.23	0.789774	0.623721	chr16	64471515	64472015	MACS_peak_1164	0.8425	0.674	chr16	64471607	64471922	MACS_peak_1164	0.61	0.774603	85.05
MACS_peak_1165	chr16-65637555-65637955	11.7616	3.16043	0.0616487	chr16	65637516	65638016	MACS_peak_1165	1	0.8	chr16	65637688	65637844	MACS_peak_1165	0.39	1	66.04
MACS_peak_1165	chr16-65637665-65638065	7.09381	0.360311	0.906119	chr16	65637516	65638016	MACS_peak_1165	0.8775	0.702	chr16	65637688	65637844	MACS_peak_1165	0.39	1	66.04
MACS_peak_1165	chr16-65637663-65638063	5.66632	-0.225462	0.956294	chr16	65637516	65638016	MACS_peak_1165	0.8825	0.706	chr16	65637688	65637844	MACS_peak_1165	0.39	1	66.04
MACS_peak_1165	chr16-65637664-65638064	6.04531	-0.300362	0.913236	chr16	65637516	65638016	MACS_peak_1165	0.88	0.704	chr16	65637688	65637844	MACS_peak_1165	0.39	1	66.04
MACS_peak_1165	chr16-65637662-65638062	10.3167	-1.20559	0.469248	chr16	65637516	65638016	MACS_peak_1165	0.885	0.708	chr16	65637688	65637844	MACS_peak_1165	0.39	1	66.04
MACS_peak_1165	chr16-65637590-65637990	5.69209	-2.87187	0.0994549	chr16	65637516	65638016	MACS_peak_1165	1	0.8	chr16	65637688	65637844	MACS_peak_1165	0.39	1	66.04
MACS_peak_1165	chr16-65637556-65637956	10.1921	-3.54852	0.0534783	chr16	65637516	65638016	MACS_peak_1165	1	0.8	chr16	65637688	65637844	MACS_peak_1165	0.39	1	66.04
MACS_peak_1166	chr16-65802888-65803288	51.1871	3.42835	0.0306017	chr16	65802860	65803360	MACS_peak_1166	1	0.8	chr16	65802851	65803368	MACS_peak_1166	1	0.773694	170.33
MACS_peak_1166	chr16-65803026-65803426	5.89154	2.58256	0.0994549	chr16	65802860	65803360	MACS_peak_1166	0.835	0.668	chr16	65802851	65803368	MACS_peak_1166	0.855	0.661509	170.33
MACS_peak_1166	chr16-65803027-65803427	7.3213	2.18052	0.223294	chr16	65802860	65803360	MACS_peak_1166	0.8325	0.666	chr16	65802851	65803368	MACS_peak_1166	0.8525	0.659574	170.33
MACS_peak_1166	chr16-65802853-65803253	1080.31	1.41291	0.371551	chr16	65802860	65803360	MACS_peak_1166	0.9825	0.786	chr16	65802851	65803368	MACS_peak_1166	1	0.773694	170.33
MACS_peak_1166	chr16-65803024-65803424	5.94738	0.72368	0.728418	chr16	65802860	65803360	MACS_peak_1166	0.84	0.672	chr16	65802851	65803368	MACS_peak_1166	0.86	0.665377	170.33
MACS_peak_1166	chr16-65803025-65803425	8.9419	-0.556109	0.850215	chr16	65802860	65803360	MACS_peak_1166	0.8375	0.67	chr16	65802851	65803368	MACS_peak_1166	0.8575	0.663443	170.33
MACS_peak_1166	chr16-65803052-65803452	5.83512	-1.89836	0.29788	chr16	65802860	65803360	MACS_peak_1166	0.77	0.616	chr16	65802851	65803368	MACS_peak_1166	0.79	0.611219	170.33
MACS_peak_1169	chr16-69744686-69745086	5.74862	2.13667	0.26531	chr16	69744733	69745233	MACS_peak_1169	0.8825	0.706	chr16	69744734	69745231	MACS_peak_1169	0.88	0.708249	550.28
MACS_peak_1169	chr16-69744687-69745087	5.68544	0.0955583	0.970463	chr16	69744733	69745233	MACS_peak_1169	0.885	0.708	chr16	69744734	69745231	MACS_peak_1169	0.8825	0.710262	550.28
MACS_peak_1170	chr16-69746632-69747032	2711.26	0.0470677	0.970463	chr16	69746746	69747246	MACS_peak_1170	0.715	0.572	chr16	69746912	69747079	MACS_peak_1170	0.3	0.718563	70.68
MACS_peak_1170	chr16-69746772-69747172	21.9467	-0.20368	0.965738	chr16	69746746	69747246	MACS_peak_1170	1	0.8	chr16	69746912	69747079	MACS_peak_1170	0.4175	1	70.68
MACS_peak_1170	chr16-69746774-69747174	36.7017	-1.37844	0.329359	chr16	69746746	69747246	MACS_peak_1170	1	0.8	chr16	69746912	69747079	MACS_peak_1170	0.4175	1	70.68
MACS_peak_1170	chr16-69746773-69747173	11.3489	-1.61369	0.290322	chr16	69746746	69747246	MACS_peak_1170	1	0.8	chr16	69746912	69747079	MACS_peak_1170	0.4175	1	70.68
MACS_peak_1172	chr16-69751974-69752374	8.04999	-0.57897	0.837598	chr16	69752115	69752615	MACS_peak_1173	0.6475	0.518	chr16	69751996	69752228	MACS_peak_1172	0.58	1	86.96
MACS_peak_1173	chr16-69752191-69752591	8.06021	-0.490066	0.866276	chr16	69752115	69752615	MACS_peak_1173	1	0.8	chr16	69752243	69752487	MACS_peak_1173	0.61	1	107.64
MACS_peak_1173	chr16-69752192-69752592	20.3302	-2.95689	0.0522487	chr16	69752115	69752615	MACS_peak_1173	1	0.8	chr16	69752243	69752487	MACS_peak_1173	0.61	1	107.64
MACS_peak_1177	chr16-70598782-70599182	7.93212	0.0936545	0.970463	chr16	70598770	70599270	MACS_peak_1177	1	0.8	chr16	70598906	70599134	MACS_peak_1177	0.57	1	60.93
MACS_peak_1177	chr16-70598967-70599367	2568.94	-0.673428	0.558552	chr16	70598770	70599270	MACS_peak_1177	0.7575	0.606	chr16	70598906	70599134	MACS_peak_1177	0.4175	0.732456	60.93
MACS_peak_1177	chr16-70598781-70599181	7.42292	-0.852392	0.726376	chr16	70598770	70599270	MACS_peak_1177	1	0.8	chr16	70598906	70599134	MACS_peak_1177	0.57	1	60.93
MACS_peak_1177	chr16-70598778-70599178	5.80185	-0.888087	0.632615	chr16	70598770	70599270	MACS_peak_1177	1	0.8	chr16	70598906	70599134	MACS_peak_1177	0.57	1	60.93
MACS_peak_1177	chr16-70598827-70599227	5.69209	-2.87187	0.0994549	chr16	70598770	70599270	MACS_peak_1177	1	0.8	chr16	70598906	70599134	MACS_peak_1177	0.57	1	60.93
MACS_peak_118	chr1-115272925-115273325	11.9014	3.80841	0.0451282	chr1	115272887	115273387	MACS_peak_118	1	0.8	chr1	115272851	115273422	MACS_peak_118	1	0.700525	84.19
MACS_peak_118	chr1-115272794-115273194	2358.23	1.82021	0.446469	chr1	115272887	115273387	MACS_peak_118	0.7675	0.614	chr1	115272851	115273422	MACS_peak_118	0.8575	0.600701	84.19
MACS_peak_118	chr1-115272938-115273338	106.372	1.74309	0.418004	chr1	115272887	115273387	MACS_peak_118	1	0.8	chr1	115272851	115273422	MACS_peak_118	1	0.700525	84.19
MACS_peak_118	chr1-115272924-115273324	11.1814	0.56858	0.809171	chr1	115272887	115273387	MACS_peak_118	1	0.8	chr1	115272851	115273422	MACS_peak_118	1	0.700525	84.19
MACS_peak_118	chr1-115272881-115273281	6222.39	0.193205	0.970463	chr1	115272887	115273387	MACS_peak_118	0.985	0.788	chr1	115272851	115273422	MACS_peak_118	1	0.700525	84.19
MACS_peak_118	chr1-115272940-115273340	47.2539	0.139886	0.970463	chr1	115272887	115273387	MACS_peak_118	1	0.8	chr1	115272851	115273422	MACS_peak_118	1	0.700525	84.19
MACS_peak_118	chr1-115272941-115273341	27.7117	-0.148914	0.970463	chr1	115272887	115273387	MACS_peak_118	1	0.8	chr1	115272851	115273422	MACS_peak_118	1	0.700525	84.19
MACS_peak_118	chr1-115272973-115273373	48.654	-0.155538	0.970463	chr1	115272887	115273387	MACS_peak_118	1	0.8	chr1	115272851	115273422	MACS_peak_118	1	0.700525	84.19
MACS_peak_118	chr1-115272844-115273244	8.07462	-0.262326	0.958592	chr1	115272887	115273387	MACS_peak_118	0.8925	0.714	chr1	115272851	115273422	MACS_peak_118	0.9825	0.688266	84.19
MACS_peak_118	chr1-115272888-115273288	8.20212	-0.284154	0.931786	chr1	115272887	115273387	MACS_peak_118	1	0.8	chr1	115272851	115273422	MACS_peak_118	1	0.700525	84.19
MACS_peak_118	chr1-115272974-115273374	46.2367	-0.298519	0.898083	chr1	115272887	115273387	MACS_peak_118	1	0.8	chr1	115272851	115273422	MACS_peak_118	1	0.700525	84.19
MACS_peak_118	chr1-115272923-115273323	9.70893	-0.361108	0.882329	chr1	115272887	115273387	MACS_peak_118	1	0.8	chr1	115272851	115273422	MACS_peak_118	1	0.700525	84.19
MACS_peak_118	chr1-115272922-115273322	15.3106	-0.682321	0.724585	chr1	115272887	115273387	MACS_peak_118	1	0.8	chr1	115272851	115273422	MACS_peak_118	1	0.700525	84.19
MACS_peak_118	chr1-115272975-115273375	115.272	-0.736485	0.59424	chr1	115272887	115273387	MACS_peak_118	1	0.8	chr1	115272851	115273422	MACS_peak_118	1	0.700525	84.19
MACS_peak_118	chr1-115272869-115273269	4015.67	-0.992408	0.588312	chr1	115272887	115273387	MACS_peak_118	0.955	0.764	chr1	115272851	115273422	MACS_peak_118	1	0.700525	84.19
MACS_peak_118	chr1-115272875-115273275	9881.42	-1.01698	0.303862	chr1	115272887	115273387	MACS_peak_118	0.97	0.776	chr1	115272851	115273422	MACS_peak_118	1	0.700525	84.19
MACS_peak_118	chr1-115272942-115273342	67.3001	-1.05245	0.42024	chr1	115272887	115273387	MACS_peak_118	1	0.8	chr1	115272851	115273422	MACS_peak_118	1	0.700525	84.19
MACS_peak_118	chr1-115272828-115273228	17.611	-1.29937	0.46602	chr1	115272887	115273387	MACS_peak_118	0.8525	0.682	chr1	115272851	115273422	MACS_peak_118	0.9425	0.660245	84.19
MACS_peak_118	chr1-115272886-115273286	7.30667	-1.49268	0.390647	chr1	115272887	115273387	MACS_peak_118	0.9975	0.798	chr1	115272851	115273422	MACS_peak_118	1	0.700525	84.19
MACS_peak_118	chr1-115272843-115273243	6.51827	-1.58432	0.364373	chr1	115272887	115273387	MACS_peak_118	0.89	0.712	chr1	115272851	115273422	MACS_peak_118	0.98	0.686515	84.19
MACS_peak_118	chr1-115272939-115273339	75.7693	-1.60735	0.321875	chr1	115272887	115273387	MACS_peak_118	1	0.8	chr1	115272851	115273422	MACS_peak_118	1	0.700525	84.19
MACS_peak_118	chr1-115272829-115273229	13.6919	-1.92042	0.334346	chr1	115272887	115273387	MACS_peak_118	0.855	0.684	chr1	115272851	115273422	MACS_peak_118	0.945	0.661996	84.19
MACS_peak_118	chr1-115272932-115273332	5.68194	-2.84766	0.0994549	chr1	115272887	115273387	MACS_peak_118	1	0.8	chr1	115272851	115273422	MACS_peak_118	1	0.700525	84.19
MACS_peak_1180	chr16-71348209-71348609	17.6417	1.15291	0.562962	chr16	71348182	71348682	MACS_peak_1180	1	0.8	chr16	71348299	71348565	MACS_peak_1180	0.665	1	65.12
MACS_peak_1180	chr16-71348134-71348534	7.6126	1.12388	0.581886	chr16	71348182	71348682	MACS_peak_1180	0.88	0.704	chr16	71348299	71348565	MACS_peak_1180	0.5875	0.883459	65.12
MACS_peak_1180	chr16-71348208-71348608	7.01752	0.516953	0.85658	chr16	71348182	71348682	MACS_peak_1180	1	0.8	chr16	71348299	71348565	MACS_peak_1180	0.665	1	65.12
MACS_peak_1180	chr16-71348207-71348607	10.7376	0.306606	0.906277	chr16	71348182	71348682	MACS_peak_1180	1	0.8	chr16	71348299	71348565	MACS_peak_1180	0.665	1	65.12
MACS_peak_1180	chr16-71348224-71348624	9.01656	-0.0433598	0.98219	chr16	71348182	71348682	MACS_peak_1180	1	0.8	chr16	71348299	71348565	MACS_peak_1180	0.665	1	65.12
MACS_peak_1180	chr16-71348136-71348536	12.9141	-0.254115	0.944699	chr16	71348182	71348682	MACS_peak_1180	0.885	0.708	chr16	71348299	71348565	MACS_peak_1180	0.5925	0.890977	65.12
MACS_peak_1180	chr16-71348225-71348625	15.242	-0.917422	0.681173	chr16	71348182	71348682	MACS_peak_1180	1	0.8	chr16	71348299	71348565	MACS_peak_1180	0.665	1	65.12
MACS_peak_1180	chr16-71348226-71348626	18.323	-1.29559	0.41688	chr16	71348182	71348682	MACS_peak_1180	1	0.8	chr16	71348299	71348565	MACS_peak_1180	0.665	1	65.12
MACS_peak_1180	chr16-71348135-71348535	16.0068	-1.32233	0.501477	chr16	71348182	71348682	MACS_peak_1180	0.8825	0.706	chr16	71348299	71348565	MACS_peak_1180	0.59	0.887218	65.12
MACS_peak_1184	chr16-72249501-72249901	17.7676	4.55809	0.00531372	chr16	72249587	72250087	MACS_peak_1184	0.785	0.628	chr16	72249702	72249972	MACS_peak_1184	0.4975	0.737037	67.08
MACS_peak_1184	chr16-72249478-72249878	43.0027	0.846932	0.740153	chr16	72249587	72250087	MACS_peak_1184	0.7275	0.582	chr16	72249702	72249972	MACS_peak_1184	0.44	0.651852	67.08
MACS_peak_1184	chr16-72249500-72249900	39.036	0.393542	0.863467	chr16	72249587	72250087	MACS_peak_1184	0.7825	0.626	chr16	72249702	72249972	MACS_peak_1184	0.495	0.733333	67.08
MACS_peak_1184	chr16-72249502-72249902	62.1995	0.275725	0.888348	chr16	72249587	72250087	MACS_peak_1184	0.7875	0.63	chr16	72249702	72249972	MACS_peak_1184	0.5	0.740741	67.08
MACS_peak_1184	chr16-72249477-72249877	61.1625	-0.354843	0.911278	chr16	72249587	72250087	MACS_peak_1184	0.725	0.58	chr16	72249702	72249972	MACS_peak_1184	0.4375	0.648148	67.08
MACS_peak_1184	chr16-72249476-72249876	74.7984	-0.358279	0.904886	chr16	72249587	72250087	MACS_peak_1184	0.7225	0.578	chr16	72249702	72249972	MACS_peak_1184	0.435	0.644444	67.08
MACS_peak_1184	chr16-72249662-72250062	9.37977	-0.703342	0.732893	chr16	72249587	72250087	MACS_peak_1184	1	0.8	chr16	72249702	72249972	MACS_peak_1184	0.675	1	67.08
MACS_peak_1184	chr16-72249486-72249886	4007.36	-0.81191	0.695428	chr16	72249587	72250087	MACS_peak_1184	0.7475	0.598	chr16	72249702	72249972	MACS_peak_1184	0.46	0.681481	67.08
MACS_peak_1184	chr16-72249661-72250061	55.684	-0.958493	0.527109	chr16	72249587	72250087	MACS_peak_1184	1	0.8	chr16	72249702	72249972	MACS_peak_1184	0.675	1	67.08
MACS_peak_1184	chr16-72249636-72250036	40.5857	-0.982631	0.59058	chr16	72249587	72250087	MACS_peak_1184	1	0.8	chr16	72249702	72249972	MACS_peak_1184	0.675	1	67.08
MACS_peak_1184	chr16-72249637-72250037	19.5945	-1.11643	0.510904	chr16	72249587	72250087	MACS_peak_1184	1	0.8	chr16	72249702	72249972	MACS_peak_1184	0.675	1	67.08
MACS_peak_1184	chr16-72249475-72249875	65.1636	-1.14753	0.377375	chr16	72249587	72250087	MACS_peak_1184	0.72	0.576	chr16	72249702	72249972	MACS_peak_1184	0.4325	0.640741	67.08
MACS_peak_1184	chr16-72249474-72249874	98.2006	-1.21684	0.290322	chr16	72249587	72250087	MACS_peak_1184	0.7175	0.574	chr16	72249702	72249972	MACS_peak_1184	0.43	0.637037	67.08
MACS_peak_1184	chr16-72249638-72250038	45.4659	-1.44764	0.259254	chr16	72249587	72250087	MACS_peak_1184	1	0.8	chr16	72249702	72249972	MACS_peak_1184	0.675	1	67.08
MACS_peak_1188	chr16-73446925-73447325	6.07873	1.74713	0.350342	chr16	73446821	73447321	MACS_peak_1188	0.99	0.792	chr16	73446947	73447194	MACS_peak_1188	0.6175	1	65.43
MACS_peak_1188	chr16-73446924-73447324	38.397	0.698807	0.739663	chr16	73446821	73447321	MACS_peak_1188	0.9925	0.794	chr16	73446947	73447194	MACS_peak_1188	0.6175	1	65.43
MACS_peak_1188	chr16-73446923-73447323	24.7927	0.154847	0.970463	chr16	73446821	73447321	MACS_peak_1188	0.995	0.796	chr16	73446947	73447194	MACS_peak_1188	0.6175	1	65.43
MACS_peak_1188	chr16-73446882-73447282	81.0518	-1.49469	0.272424	chr16	73446821	73447321	MACS_peak_1188	1	0.8	chr16	73446947	73447194	MACS_peak_1188	0.6175	1	65.43
MACS_peak_1196	chr16-74288196-74288596	10.838	3.99606	0.0142162	chr16	74288220	74288720	MACS_peak_1196	0.94	0.752	chr16	74288307	74288632	MACS_peak_1196	0.7225	0.889231	70.78
MACS_peak_1196	chr16-74288280-74288680	44.1181	0.622094	0.730727	chr16	74288220	74288720	MACS_peak_1196	1	0.8	chr16	74288307	74288632	MACS_peak_1196	0.8125	1	70.78
MACS_peak_1196	chr16-74288278-74288678	46.8033	0.57717	0.830441	chr16	74288220	74288720	MACS_peak_1196	1	0.8	chr16	74288307	74288632	MACS_peak_1196	0.8125	1	70.78
MACS_peak_1196	chr16-74288151-74288551	7.56255	0.573954	0.79333	chr16	74288220	74288720	MACS_peak_1196	0.8275	0.662	chr16	74288307	74288632	MACS_peak_1196	0.61	0.750769	70.78
MACS_peak_1196	chr16-74288197-74288597	5.68544	0.0955583	0.970463	chr16	74288220	74288720	MACS_peak_1196	0.9425	0.754	chr16	74288307	74288632	MACS_peak_1196	0.725	0.892308	70.78
MACS_peak_1196	chr16-74288203-74288603	73.6651	-0.132607	0.970463	chr16	74288220	74288720	MACS_peak_1196	0.9575	0.766	chr16	74288307	74288632	MACS_peak_1196	0.74	0.910769	70.78
MACS_peak_1196	chr16-74288202-74288602	24.0857	-0.2229	0.954732	chr16	74288220	74288720	MACS_peak_1196	0.955	0.764	chr16	74288307	74288632	MACS_peak_1196	0.7375	0.907692	70.78
MACS_peak_1196	chr16-74288201-74288601	8.21841	-1.66202	0.323014	chr16	74288220	74288720	MACS_peak_1196	0.9525	0.762	chr16	74288307	74288632	MACS_peak_1196	0.735	0.904615	70.78
MACS_peak_1196	chr16-74288338-74288738	6.26979	-2.29396	0.204327	chr16	74288220	74288720	MACS_peak_1196	0.955	0.764	chr16	74288307	74288632	MACS_peak_1196	0.735	0.904615	70.78
MACS_peak_12	chr1-8926910-8927310	2618.38	-0.4748	0.693429	chr1	8927014	8927514	MACS_peak_12	0.74	0.592	chr1	8927184	8927343	MACS_peak_12	0.315	0.792453	65.4
MACS_peak_12	chr1-8926915-8927315	6.71019	-1.74519	0.282466	chr1	8927014	8927514	MACS_peak_12	0.7525	0.602	chr1	8927184	8927343	MACS_peak_12	0.3275	0.823899	65.4
MACS_peak_1207	chr16-76318252-76318652	6.07808	-1.17381	0.527196	chr16	76318171	76318671	MACS_peak_1207	1	0.8	chr16	76318303	76318538	MACS_peak_1207	0.5875	1	60.57
MACS_peak_1207	chr16-76318245-76318645	7.94418	-1.49349	0.403457	chr16	76318171	76318671	MACS_peak_1207	1	0.8	chr16	76318303	76318538	MACS_peak_1207	0.5875	1	60.57
MACS_peak_1208	chr16-76562635-76563035	13.3658	3.9594	0.0350089	chr16	76562639	76563139	MACS_peak_1208	0.99	0.792	chr16	76562749	76563029	MACS_peak_1208	0.7	1	66.44
MACS_peak_1208	chr16-76562769-76563169	14.6921	-3.94658	0.0368875	chr16	76562639	76563139	MACS_peak_1208	0.925	0.74	chr16	76562749	76563029	MACS_peak_1208	0.65	0.928571	66.44
MACS_peak_1208	chr16-76562779-76563179	15.0717	2.99858	0.0994549	chr16	76562639	76563139	MACS_peak_1208	0.9	0.72	chr16	76562749	76563029	MACS_peak_1208	0.625	0.892857	66.44
MACS_peak_1208	chr16-76562776-76563176	12.1814	2.7969	0.0994549	chr16	76562639	76563139	MACS_peak_1208	0.9075	0.726	chr16	76562749	76563029	MACS_peak_1208	0.6325	0.903571	66.44
MACS_peak_1208	chr16-76562682-76563082	19.7305	2.53392	0.18872	chr16	76562639	76563139	MACS_peak_1208	1	0.8	chr16	76562749	76563029	MACS_peak_1208	0.7	1	66.44
MACS_peak_1208	chr16-76562768-76563168	21.9798	1.14691	0.583814	chr16	76562639	76563139	MACS_peak_1208	0.9275	0.742	chr16	76562749	76563029	MACS_peak_1208	0.6525	0.932143	66.44
MACS_peak_1208	chr16-76562544-76562944	24.6083	-0.509439	0.836934	chr16	76562639	76563139	MACS_peak_1208	0.7625	0.61	chr16	76562749	76563029	MACS_peak_1208	0.4875	0.696429	66.44
MACS_peak_1208	chr16-76562631-76563031	6.47101	-0.898137	0.640861	chr16	76562639	76563139	MACS_peak_1208	0.98	0.784	chr16	76562749	76563029	MACS_peak_1208	0.7	1	66.44
MACS_peak_1208	chr16-76562757-76563157	21.3631	-1.21354	0.476681	chr16	76562639	76563139	MACS_peak_1208	0.955	0.764	chr16	76562749	76563029	MACS_peak_1208	0.68	0.971429	66.44
MACS_peak_1208	chr16-76562770-76563170	15.8549	-1.29764	0.442568	chr16	76562639	76563139	MACS_peak_1208	0.9225	0.738	chr16	76562749	76563029	MACS_peak_1208	0.6475	0.925	66.44
MACS_peak_1208	chr16-76562774-76563174	5.5795	-1.30571	0.447357	chr16	76562639	76563139	MACS_peak_1208	0.9125	0.73	chr16	76562749	76563029	MACS_peak_1208	0.6375	0.910714	66.44
MACS_peak_1208	chr16-76562679-76563079	9.2179	-1.42552	0.395072	chr16	76562639	76563139	MACS_peak_1208	1	0.8	chr16	76562749	76563029	MACS_peak_1208	0.7	1	66.44
MACS_peak_1208	chr16-76562680-76563080	6.5584	-1.66251	0.326569	chr16	76562639	76563139	MACS_peak_1208	1	0.8	chr16	76562749	76563029	MACS_peak_1208	0.7	1	66.44
MACS_peak_1208	chr16-76562817-76563217	5.69209	-2.87187	0.0994549	chr16	76562639	76563139	MACS_peak_1208	0.805	0.644	chr16	76562749	76563029	MACS_peak_1208	0.53	0.757143	66.44
MACS_peak_1209	chr16-76631676-76632076	6.38455	-0.747644	0.734047	chr16	76631560	76632060	MACS_peak_1209	0.96	0.768	chr16	76631699	76631921	MACS_peak_1209	0.555	1	67.68
MACS_peak_1218	chr16-78100880-78101280	8.33164	3.40967	0.0534783	chr16	78100833	78101333	MACS_peak_1218	1	0.8	chr16	78100803	78101362	MACS_peak_1218	1	0.715564	99.91
MACS_peak_1218	chr16-78100793-78101193	7.34768	-0.867568	0.631138	chr16	78100833	78101333	MACS_peak_1218	0.9	0.72	chr16	78100803	78101362	MACS_peak_1218	0.975	0.697674	99.91
MACS_peak_1218	chr16-78100840-78101240	6.65809	-0.965866	0.601535	chr16	78100833	78101333	MACS_peak_1218	1	0.8	chr16	78100803	78101362	MACS_peak_1218	1	0.715564	99.91
MACS_peak_122	chr1-117421853-117422253	6108.65	0.72323	0.830441	chr1	117421741	117422291	MACS_peak_122	1	0.727273	chr1	117421707	117422325	MACS_peak_122	1	0.647249	161.94
MACS_peak_1220	chr16-78833923-78834323	1056.81	5.97805	0.000292296	chr16	78833774	78834274	MACS_peak_1220	0.8775	0.702	chr16	78833950	78834097	MACS_peak_1220	0.3675	1	66.3
MACS_peak_1220	chr16-78833778-78834178	8.33164	3.40967	0.0534783	chr16	78833774	78834274	MACS_peak_1220	1	0.8	chr16	78833950	78834097	MACS_peak_1220	0.3675	1	66.3
MACS_peak_1220	chr16-78834005-78834405	5.68657	-0.606426	0.793026	chr16	78833774	78834274	MACS_peak_1220	0.6725	0.538	chr16	78833950	78834097	MACS_peak_1220	0.23	0.62585	66.3
MACS_peak_1220	chr16-78834007-78834407	8.83802	-0.734632	0.693958	chr16	78833774	78834274	MACS_peak_1220	0.6675	0.534	chr16	78833950	78834097	MACS_peak_1220	0.225	0.612245	66.3
MACS_peak_1220	chr16-78833847-78834247	5.93485	-2.17224	0.207025	chr16	78833774	78834274	MACS_peak_1220	1	0.8	chr16	78833950	78834097	MACS_peak_1220	0.3675	1	66.3
MACS_peak_1220	chr16-78834004-78834404	9.98471	-3.50737	0.0534783	chr16	78833774	78834274	MACS_peak_1220	0.675	0.54	chr16	78833950	78834097	MACS_peak_1220	0.2325	0.632653	66.3
MACS_peak_1223	chr16-79474660-79475060	6.71628	0.672027	0.764664	chr16	79474531	79475031	MACS_peak_1223	0.9275	0.742	chr16	79474682	79474880	MACS_peak_1223	0.495	1	62.6
MACS_peak_1223	chr16-79474559-79474959	6.42107	-1.15617	0.523801	chr16	79474531	79475031	MACS_peak_1223	1	0.8	chr16	79474682	79474880	MACS_peak_1223	0.495	1	62.6
MACS_peak_1223	chr16-79474659-79475059	7.55122	-1.28623	0.547269	chr16	79474531	79475031	MACS_peak_1223	0.93	0.744	chr16	79474682	79474880	MACS_peak_1223	0.495	1	62.6
MACS_peak_1223	chr16-79474658-79475058	11.1209	-1.31599	0.461671	chr16	79474531	79475031	MACS_peak_1223	0.9325	0.746	chr16	79474682	79474880	MACS_peak_1223	0.495	1	62.6
MACS_peak_1230	chr16-83113251-83113651	8.33164	3.40967	0.0534783	chr16	83113060	83113560	MACS_peak_1230	0.7725	0.618	chr16	83113244	83113375	MACS_peak_1230	0.31	0.946565	65.73
MACS_peak_1230	chr16-83112943-83113343	17.6537	0.46882	0.842609	chr16	83113060	83113560	MACS_peak_1230	0.7075	0.566	chr16	83113244	83113375	MACS_peak_1230	0.2475	0.755725	65.73
MACS_peak_1230	chr16-83112944-83113344	8.61441	0.169007	0.970463	chr16	83113060	83113560	MACS_peak_1230	0.71	0.568	chr16	83113244	83113375	MACS_peak_1230	0.25	0.763359	65.73
MACS_peak_1230	chr16-83112942-83113342	12.6816	-0.548887	0.85658	chr16	83113060	83113560	MACS_peak_1230	0.705	0.564	chr16	83113244	83113375	MACS_peak_1230	0.245	0.748092	65.73
MACS_peak_1230	chr16-83112945-83113345	20.9723	-0.794664	0.662376	chr16	83113060	83113560	MACS_peak_1230	0.7125	0.57	chr16	83113244	83113375	MACS_peak_1230	0.2525	0.770992	65.73
MACS_peak_1231	chr16-83404810-83405210	53.7766	-0.354822	0.910282	chr16	83404809	83405309	MACS_peak_1231	1	0.8	chr16	83404920	83405197	MACS_peak_1231	0.6925	1	70.73
MACS_peak_1231	chr16-83405026-83405426	9.56447	-0.664658	0.813853	chr16	83404809	83405309	MACS_peak_1231	0.7075	0.566	chr16	83404920	83405197	MACS_peak_1231	0.4275	0.617329	70.73
MACS_peak_1231	chr16-83404876-83405276	6.28215	-0.865048	0.645649	chr16	83404809	83405309	MACS_peak_1231	1	0.8	chr16	83404920	83405197	MACS_peak_1231	0.6925	1	70.73
MACS_peak_1231	chr16-83404811-83405211	80.4956	-0.89251	0.554798	chr16	83404809	83405309	MACS_peak_1231	1	0.8	chr16	83404920	83405197	MACS_peak_1231	0.6925	1	70.73
MACS_peak_1231	chr16-83404873-83405273	7.17277	-1.26724	0.471342	chr16	83404809	83405309	MACS_peak_1231	1	0.8	chr16	83404920	83405197	MACS_peak_1231	0.6925	1	70.73
MACS_peak_1231	chr16-83404809-83405209	6.54035	-1.26769	0.548167	chr16	83404809	83405309	MACS_peak_1231	1	0.8	chr16	83404920	83405197	MACS_peak_1231	0.6925	1	70.73
MACS_peak_1231	chr16-83405028-83405428	9.14413	-2.11435	0.184119	chr16	83404809	83405309	MACS_peak_1231	0.7025	0.562	chr16	83404920	83405197	MACS_peak_1231	0.4225	0.610108	70.73
MACS_peak_1231	chr16-83404874-83405274	5.69943	-2.63981	0.13357	chr16	83404809	83405309	MACS_peak_1231	1	0.8	chr16	83404920	83405197	MACS_peak_1231	0.6925	1	70.73
MACS_peak_1231	chr16-83404877-83405277	10.1921	-3.54852	0.0534783	chr16	83404809	83405309	MACS_peak_1231	1	0.8	chr16	83404920	83405197	MACS_peak_1231	0.6925	1	70.73
MACS_peak_1237	chr16-85186210-85186610	12.6395	2.30184	0.187593	chr16	85186157	85186657	MACS_peak_1237	1	0.8	chr16	85186236	85186578	MACS_peak_1237	0.855	1	60.76
MACS_peak_1238	chr16-85840235-85840635	6.84338	-2.20885	0.175178	chr16	85840232	85840732	MACS_peak_1238	1	0.8	chr16	85840311	85840653	MACS_peak_1238	0.81	0.947368	65.28
MACS_peak_1239	chr16-86158813-86159213	12.9548	3.48497	0.0534783	chr16	86158780	86159280	MACS_peak_1239	1	0.8	chr16	86158883	86159176	MACS_peak_1239	0.7325	1	70.08
MACS_peak_1239	chr16-86158812-86159212	6.02577	3.06077	0.0854051	chr16	86158780	86159280	MACS_peak_1239	1	0.8	chr16	86158883	86159176	MACS_peak_1239	0.7325	1	70.08
MACS_peak_1239	chr16-86158796-86159196	24.853	2.43028	0.0994549	chr16	86158780	86159280	MACS_peak_1239	1	0.8	chr16	86158883	86159176	MACS_peak_1239	0.7325	1	70.08
MACS_peak_1239	chr16-86158917-86159317	17.7551	2.05131	0.150482	chr16	86158780	86159280	MACS_peak_1239	0.9075	0.726	chr16	86158883	86159176	MACS_peak_1239	0.6475	0.883959	70.08
MACS_peak_1239	chr16-86158916-86159316	6.16938	1.85921	0.262757	chr16	86158780	86159280	MACS_peak_1239	0.91	0.728	chr16	86158883	86159176	MACS_peak_1239	0.65	0.887372	70.08
MACS_peak_1239	chr16-86158797-86159197	11.3292	1.39914	0.467421	chr16	86158780	86159280	MACS_peak_1239	1	0.8	chr16	86158883	86159176	MACS_peak_1239	0.7325	1	70.08
MACS_peak_1239	chr16-86158794-86159194	27.3411	0.903996	0.625313	chr16	86158780	86159280	MACS_peak_1239	1	0.8	chr16	86158883	86159176	MACS_peak_1239	0.7325	1	70.08
MACS_peak_1239	chr16-86158918-86159318	12.5499	0.716469	0.701684	chr16	86158780	86159280	MACS_peak_1239	0.905	0.724	chr16	86158883	86159176	MACS_peak_1239	0.645	0.880546	70.08
MACS_peak_1239	chr16-86158811-86159211	15.0494	0.706324	0.72359	chr16	86158780	86159280	MACS_peak_1239	1	0.8	chr16	86158883	86159176	MACS_peak_1239	0.7325	1	70.08
MACS_peak_1239	chr16-86158693-86159093	6.642	0.402512	0.882634	chr16	86158780	86159280	MACS_peak_1239	0.7825	0.626	chr16	86158883	86159176	MACS_peak_1239	0.525	0.716724	70.08
MACS_peak_1239	chr16-86158795-86159195	14.7418	0.395456	0.866296	chr16	86158780	86159280	MACS_peak_1239	1	0.8	chr16	86158883	86159176	MACS_peak_1239	0.7325	1	70.08
MACS_peak_1239	chr16-86158919-86159319	21.0335	0.18818	0.965759	chr16	86158780	86159280	MACS_peak_1239	0.9025	0.722	chr16	86158883	86159176	MACS_peak_1239	0.6425	0.877133	70.08
MACS_peak_1239	chr16-86158689-86159089	15.009	0.0883907	0.970463	chr16	86158780	86159280	MACS_peak_1239	0.7725	0.618	chr16	86158883	86159176	MACS_peak_1239	0.515	0.703072	70.08
MACS_peak_1239	chr16-86158803-86159203	17.3316	-0.255418	0.963221	chr16	86158780	86159280	MACS_peak_1239	1	0.8	chr16	86158883	86159176	MACS_peak_1239	0.7325	1	70.08
MACS_peak_1239	chr16-86158695-86159095	9.2007	-0.435226	0.853163	chr16	86158780	86159280	MACS_peak_1239	0.7875	0.63	chr16	86158883	86159176	MACS_peak_1239	0.53	0.723549	70.08
MACS_peak_1239	chr16-86158692-86159092	12.8568	-1.24795	0.452724	chr16	86158780	86159280	MACS_peak_1239	0.78	0.624	chr16	86158883	86159176	MACS_peak_1239	0.5225	0.713311	70.08
MACS_peak_1239	chr16-86158691-86159091	6.92913	-1.40178	0.408427	chr16	86158780	86159280	MACS_peak_1239	0.7775	0.622	chr16	86158883	86159176	MACS_peak_1239	0.52	0.709898	70.08
MACS_peak_1239	chr16-86158990-86159390	13.3094	-1.53118	0.384746	chr16	86158780	86159280	MACS_peak_1239	0.725	0.58	chr16	86158883	86159176	MACS_peak_1239	0.465	0.634812	70.08
MACS_peak_1241	chr16-87866326-87866726	5.68194	-2.84766	0.0994549	chr16	87866279	87866779	MACS_peak_1241	1	0.8	chr16	87866387	87866670	MACS_peak_1241	0.7075	1	63.53
MACS_peak_1249	chr17-1562894-1563294	550.733	-0.293308	0.964796	chr17	1562953	1563453	MACS_peak_1249	0.8525	0.682	chr17	1563055	1563350	MACS_peak_1249	0.5975	0.810169	67.39
MACS_peak_1249	chr17-1562991-1563391	5.83051	-0.388128	0.90197	chr17	1562953	1563453	MACS_peak_1249	1	0.8	chr17	1563055	1563350	MACS_peak_1249	0.7375	1	67.39
MACS_peak_1249	chr17-1562896-1563296	9512.38	-2.55322	0.0832206	chr17	1562953	1563453	MACS_peak_1249	0.8575	0.686	chr17	1563055	1563350	MACS_peak_1249	0.6025	0.816949	67.39
MACS_peak_1253	chr17-4757796-4758196	37.0332	3.59609	0.0122257	chr17	4757577	4758077	MACS_peak_1253	0.7025	0.562	chr17	4757689	4757965	MACS_peak_1253	0.4225	0.612319	70.01
MACS_peak_1253	chr17-4757798-4758198	44.5758	2.46317	0.0675197	chr17	4757577	4758077	MACS_peak_1253	0.6975	0.558	chr17	4757689	4757965	MACS_peak_1253	0.4175	0.605072	70.01
MACS_peak_1253	chr17-4757794-4758194	181.75	1.82915	0.283666	chr17	4757577	4758077	MACS_peak_1253	0.7075	0.566	chr17	4757689	4757965	MACS_peak_1253	0.4275	0.619565	70.01
MACS_peak_1259	chr17-10108929-10109329	310.191	3.78971	0.0117461							chr17	10108954	10109215	MACS_peak_1259	0.6525	1	72.23
MACS_peak_1259	chr17-10108952-10109352	1392.24	3.48711	0.0142162							chr17	10108954	10109215	MACS_peak_1259	0.6525	1	72.23
MACS_peak_1259	chr17-10108931-10109331	435.515	3.00934	0.0047393							chr17	10108954	10109215	MACS_peak_1259	0.6525	1	72.23
MACS_peak_1259	chr17-10108954-10109354	2332.87	2.71406	0.00658098							chr17	10108954	10109215	MACS_peak_1259	0.6525	1	72.23
MACS_peak_1259	chr17-10108930-10109330	194.657	2.14507	0.0534783							chr17	10108954	10109215	MACS_peak_1259	0.6525	1	72.23
MACS_peak_1259	chr17-10108953-10109353	1435.99	1.97405	0.0585792							chr17	10108954	10109215	MACS_peak_1259	0.6525	1	72.23
MACS_peak_126	chr1-144892503-144892903	6.02577	3.06077	0.0854051	chr1	144892308	144892808	MACS_peak_126	0.7625	0.61	chr1	144892500	144892615	MACS_peak_126	0.28	0.973913	61.34
MACS_peak_126	chr1-144892233-144892633	39.5117	1.57779	0.238677	chr1	144892308	144892808	MACS_peak_126	0.8125	0.65	chr1	144892500	144892615	MACS_peak_126	0.2875	1	61.34
MACS_peak_126	chr1-144892231-144892631	7.85967	1.36881	0.409395	chr1	144892308	144892808	MACS_peak_126	0.8075	0.646	chr1	144892500	144892615	MACS_peak_126	0.2875	1	61.34
MACS_peak_126	chr1-144892505-144892905	6.70502	0.422653	0.88235	chr1	144892308	144892808	MACS_peak_126	0.7575	0.606	chr1	144892500	144892615	MACS_peak_126	0.275	0.956522	61.34
MACS_peak_126	chr1-144892189-144892589	5496.12	0.0995517	0.970463	chr1	144892308	144892808	MACS_peak_126	0.7025	0.562	chr1	144892500	144892615	MACS_peak_126	0.2225	0.773913	61.34
MACS_peak_126	chr1-144892506-144892906	6.73098	-0.14877	0.970463	chr1	144892308	144892808	MACS_peak_126	0.755	0.604	chr1	144892500	144892615	MACS_peak_126	0.2725	0.947826	61.34
MACS_peak_126	chr1-144892510-144892910	63.4061	-0.711884	0.669548	chr1	144892308	144892808	MACS_peak_126	0.745	0.596	chr1	144892500	144892615	MACS_peak_126	0.2625	0.913043	61.34
MACS_peak_126	chr1-144892508-144892908	8.79953	-0.870913	0.621041	chr1	144892308	144892808	MACS_peak_126	0.75	0.6	chr1	144892500	144892615	MACS_peak_126	0.2675	0.930435	61.34
MACS_peak_126	chr1-144892190-144892590	5800.35	-1.01574	0.547971	chr1	144892308	144892808	MACS_peak_126	0.705	0.564	chr1	144892500	144892615	MACS_peak_126	0.225	0.782609	61.34
MACS_peak_126	chr1-144892206-144892606	6.65312	-1.07181	0.630553	chr1	144892308	144892808	MACS_peak_126	0.745	0.596	chr1	144892500	144892615	MACS_peak_126	0.265	0.921739	61.34
MACS_peak_126	chr1-144892507-144892907	9.86097	-1.26215	0.469972	chr1	144892308	144892808	MACS_peak_126	0.7525	0.602	chr1	144892500	144892615	MACS_peak_126	0.27	0.93913	61.34
MACS_peak_126	chr1-144892208-144892608	7.27733	-1.3854	0.420991	chr1	144892308	144892808	MACS_peak_126	0.75	0.6	chr1	144892500	144892615	MACS_peak_126	0.27	0.93913	61.34
MACS_peak_126	chr1-144892504-144892904	5.83405	-1.59845	0.445932	chr1	144892308	144892808	MACS_peak_126	0.76	0.608	chr1	144892500	144892615	MACS_peak_126	0.2775	0.965217	61.34
MACS_peak_1260	chr17-12741040-12741440	17.5222	0.204973	0.970463	chr17	12741003	12741503	MACS_peak_1260	1	0.8	chr17	12741124	12741381	MACS_peak_1260	0.6425	1	62.44
MACS_peak_1260	chr17-12741038-12741438	5.68544	0.0955583	0.970463	chr17	12741003	12741503	MACS_peak_1260	1	0.8	chr17	12741124	12741381	MACS_peak_1260	0.6425	1	62.44
MACS_peak_1260	chr17-12741107-12741507	5.68544	0.0955583	0.970463	chr17	12741003	12741503	MACS_peak_1260	0.99	0.792	chr17	12741124	12741381	MACS_peak_1260	0.6425	1	62.44
MACS_peak_1260	chr17-12741041-12741441	11.1234	-0.0259544	0.986984	chr17	12741003	12741503	MACS_peak_1260	1	0.8	chr17	12741124	12741381	MACS_peak_1260	0.6425	1	62.44
MACS_peak_1260	chr17-12740987-12741387	6.58863	-0.33633	0.893301	chr17	12741003	12741503	MACS_peak_1260	0.96	0.768	chr17	12741124	12741381	MACS_peak_1260	0.6425	1	62.44
MACS_peak_1260	chr17-12741039-12741439	13.064	-0.835297	0.706026	chr17	12741003	12741503	MACS_peak_1260	1	0.8	chr17	12741124	12741381	MACS_peak_1260	0.6425	1	62.44
MACS_peak_1260	chr17-12741103-12741503	6.24044	-1.74251	0.289681	chr17	12741003	12741503	MACS_peak_1260	1	0.8	chr17	12741124	12741381	MACS_peak_1260	0.6425	1	62.44
MACS_peak_1260	chr17-12740988-12741388	9.06211	-2.60746	0.156722	chr17	12741003	12741503	MACS_peak_1260	0.9625	0.77	chr17	12741124	12741381	MACS_peak_1260	0.6425	1	62.44
MACS_peak_1260	chr17-12741068-12741468	5.69209	-2.87187	0.0994549	chr17	12741003	12741503	MACS_peak_1260	1	0.8	chr17	12741124	12741381	MACS_peak_1260	0.6425	1	62.44
MACS_peak_127	chr1-145105491-145105891	185.251	0.263525	0.926495	chr1	145105493	145105993	MACS_peak_127	0.995	0.796	chr1	145105462	145106023	MACS_peak_127	1	0.713012	65.47
MACS_peak_127	chr1-145105641-145106041	10.1921	-3.54852	0.0534783	chr1	145105493	145105993	MACS_peak_127	0.88	0.704	chr1	145105462	145106023	MACS_peak_127	0.955	0.680927	65.47
MACS_peak_1271	chr17-28137067-28137467	8.58471	-1.00197	0.565428	chr17	28137082	28137582	MACS_peak_1271	0.9625	0.77	chr17	28137210	28137454	MACS_peak_1271	0.61	1	64.29
MACS_peak_1271	chr17-28137192-28137592	6.44952	-1.90497	0.275126	chr17	28137082	28137582	MACS_peak_1271	0.975	0.78	chr17	28137210	28137454	MACS_peak_1271	0.61	1	64.29
MACS_peak_1271	chr17-28137193-28137593	6.52542	-3.03615	0.0921739	chr17	28137082	28137582	MACS_peak_1271	0.9725	0.778	chr17	28137210	28137454	MACS_peak_1271	0.61	1	64.29
MACS_peak_1272	chr17-28331069-28331469	5.94512	2.24381	0.230127	chr17	28330949	28331449	MACS_peak_1272	0.95	0.76	chr17	28331056	28331342	MACS_peak_1272	0.6825	0.954545	100.74
MACS_peak_1272	chr17-28331072-28331472	18.6067	2.07281	0.148813	chr17	28330949	28331449	MACS_peak_1272	0.9425	0.754	chr17	28331056	28331342	MACS_peak_1272	0.675	0.944056	100.74
MACS_peak_1272	chr17-28331073-28331473	11.5345	1.67475	0.281904	chr17	28330949	28331449	MACS_peak_1272	0.94	0.752	chr17	28331056	28331342	MACS_peak_1272	0.6725	0.940559	100.74
MACS_peak_1272	chr17-28331137-28331537	9.1853	1.64851	0.384991	chr17	28330949	28331449	MACS_peak_1272	0.78	0.624	chr17	28331056	28331342	MACS_peak_1272	0.5125	0.716783	100.74
MACS_peak_1272	chr17-28331071-28331471	19.7622	1.16762	0.627873	chr17	28330949	28331449	MACS_peak_1272	0.945	0.756	chr17	28331056	28331342	MACS_peak_1272	0.6775	0.947552	100.74
MACS_peak_1272	chr17-28331074-28331474	17.9033	0.382149	0.866027	chr17	28330949	28331449	MACS_peak_1272	0.9375	0.75	chr17	28331056	28331342	MACS_peak_1272	0.67	0.937063	100.74
MACS_peak_1272	chr17-28331138-28331538	14.8968	0.0902722	0.970463	chr17	28330949	28331449	MACS_peak_1272	0.7775	0.622	chr17	28331056	28331342	MACS_peak_1272	0.51	0.713287	100.74
MACS_peak_1272	chr17-28331135-28331535	23.0043	-2.10124	0.218047	chr17	28330949	28331449	MACS_peak_1272	0.785	0.628	chr17	28331056	28331342	MACS_peak_1272	0.5175	0.723776	100.74
MACS_peak_1274	chr17-37202938-37203338	99.2032	5.82687	1.33615e-05	chr17	37202913	37203463	MACS_peak_1274	1	0.727273	chr17	37202874	37203502	MACS_peak_1274	1	0.636943	575.16
MACS_peak_1274	chr17-37202937-37203337	58.6764	5.40178	0.000123148	chr17	37202913	37203463	MACS_peak_1274	1	0.727273	chr17	37202874	37203502	MACS_peak_1274	1	0.636943	575.16
MACS_peak_1274	chr17-37203028-37203428	45.2577	4.54612	0.00196554	chr17	37202913	37203463	MACS_peak_1274	1	0.727273	chr17	37202874	37203502	MACS_peak_1274	1	0.636943	575.16
MACS_peak_1274	chr17-37203040-37203440	1917.06	4.34581	0.00394856	chr17	37202913	37203463	MACS_peak_1274	1	0.727273	chr17	37202874	37203502	MACS_peak_1274	1	0.636943	575.16
MACS_peak_1274	chr17-37203041-37203441	2831.46	4.08626	0.00260255	chr17	37202913	37203463	MACS_peak_1274	1	0.727273	chr17	37202874	37203502	MACS_peak_1274	1	0.636943	575.16
MACS_peak_1274	chr17-37202935-37203335	118.731	3.70111	0.00135553	chr17	37202913	37203463	MACS_peak_1274	1	0.727273	chr17	37202874	37203502	MACS_peak_1274	1	0.636943	575.16
MACS_peak_1274	chr17-37202936-37203336	1255.46	3.66873	0.00014566	chr17	37202913	37203463	MACS_peak_1274	1	0.727273	chr17	37202874	37203502	MACS_peak_1274	1	0.636943	575.16
MACS_peak_1274	chr17-37203043-37203443	1694.35	3.42087	0.000153625	chr17	37202913	37203463	MACS_peak_1274	1	0.727273	chr17	37202874	37203502	MACS_peak_1274	1	0.636943	575.16
MACS_peak_1274	chr17-37202934-37203334	110.073	3.25063	0.0248238	chr17	37202913	37203463	MACS_peak_1274	1	0.727273	chr17	37202874	37203502	MACS_peak_1274	1	0.636943	575.16
MACS_peak_1274	chr17-37203042-37203442	534.989	3.1937	0.00157993	chr17	37202913	37203463	MACS_peak_1274	1	0.727273	chr17	37202874	37203502	MACS_peak_1274	1	0.636943	575.16
MACS_peak_1274	chr17-37202942-37203342	19.7546	3.6918	0.0534783	chr17	37202913	37203463	MACS_peak_1274	1	0.727273	chr17	37202874	37203502	MACS_peak_1274	1	0.636943	575.16
MACS_peak_1274	chr17-37202933-37203333	310.951	3.1092	0.0534783	chr17	37202913	37203463	MACS_peak_1274	1	0.727273	chr17	37202874	37203502	MACS_peak_1274	1	0.636943	575.16
MACS_peak_1275	chr17-37627759-37628159	30.5128	0.0470512	0.97734	chr17	37627698	37628198	MACS_peak_1275	1	0.8	chr17	37627850	37628046	MACS_peak_1275	0.49	1	61.07
MACS_peak_1275	chr17-37627760-37628160	17.1243	-0.224969	0.970463	chr17	37627698	37628198	MACS_peak_1275	1	0.8	chr17	37627850	37628046	MACS_peak_1275	0.49	1	61.07
MACS_peak_1275	chr17-37627757-37628157	64.9683	-1.14078	0.392746	chr17	37627698	37628198	MACS_peak_1275	1	0.8	chr17	37627850	37628046	MACS_peak_1275	0.49	1	61.07
MACS_peak_1275	chr17-37627676-37628076	27.4712	-2.12172	0.195652	chr17	37627698	37628198	MACS_peak_1275	0.945	0.756	chr17	37627850	37628046	MACS_peak_1275	0.49	1	61.07
MACS_peak_1285	chr17-45734211-45734611	73.9816	-0.361954	0.85215	chr17	45734081	45734581	MACS_peak_1285	0.925	0.74	chr17	45734192	45734470	MACS_peak_1285	0.6475	0.931655	63.41
MACS_peak_1285	chr17-45734210-45734610	145.173	-0.499668	0.773923	chr17	45734081	45734581	MACS_peak_1285	0.9275	0.742	chr17	45734192	45734470	MACS_peak_1285	0.65	0.935252	63.41
MACS_peak_1285	chr17-45734207-45734607	28.1512	-1.05855	0.530108	chr17	45734081	45734581	MACS_peak_1285	0.935	0.748	chr17	45734192	45734470	MACS_peak_1285	0.6575	0.946043	63.41
MACS_peak_1285	chr17-45734208-45734608	17.7849	-1.30507	0.411511	chr17	45734081	45734581	MACS_peak_1285	0.9325	0.746	chr17	45734192	45734470	MACS_peak_1285	0.655	0.942446	63.41
MACS_peak_1285	chr17-45734209-45734609	117.496	-1.41767	0.308903	chr17	45734081	45734581	MACS_peak_1285	0.93	0.744	chr17	45734192	45734470	MACS_peak_1285	0.6525	0.938849	63.41
MACS_peak_1290	chr17-48449069-48449469	43.0425	1.82361	0.271845	chr17	48448863	48449363	MACS_peak_1290	0.735	0.588	chr17	48448986	48449239	MACS_peak_1290	0.425	0.671937	62.5
MACS_peak_1290	chr17-48449071-48449471	25.073	-0.197347	0.970209	chr17	48448863	48449363	MACS_peak_1290	0.73	0.584	chr17	48448986	48449239	MACS_peak_1290	0.42	0.664032	62.5
MACS_peak_1297	chr17-50384433-50384833	17.1243	-0.224969	0.970463	chr17	50384513	50385013	MACS_peak_1297	0.8	0.64	chr17	50384673	50384852	MACS_peak_1297	0.4	0.893855	63.99
MACS_peak_1297	chr17-50384431-50384831	8.34052	-0.41476	0.861896	chr17	50384513	50385013	MACS_peak_1297	0.795	0.636	chr17	50384673	50384852	MACS_peak_1297	0.395	0.882682	63.99
MACS_peak_1297	chr17-50384508-50384908	9.38008	-2.42949	0.0994549	chr17	50384513	50385013	MACS_peak_1297	0.9875	0.79	chr17	50384673	50384852	MACS_peak_1297	0.4475	1	63.99
MACS_peak_1298	chr17-50914045-50914445	12.2398	1.51833	0.320658	chr17	50913960	50914460	MACS_peak_1298	1	0.8	chr17	50914069	50914351	MACS_peak_1298	0.705	1	67.56
MACS_peak_1298	chr17-50914147-50914547	7.21471	-0.278331	0.943803	chr17	50913960	50914460	MACS_peak_1298	0.7825	0.626	chr17	50914069	50914351	MACS_peak_1298	0.51	0.723404	67.56
MACS_peak_1298	chr17-50914046-50914446	11.5675	-0.436913	0.844985	chr17	50913960	50914460	MACS_peak_1298	1	0.8	chr17	50914069	50914351	MACS_peak_1298	0.705	1	67.56
MACS_peak_1298	chr17-50914047-50914447	23.2561	-0.601004	0.764764	chr17	50913960	50914460	MACS_peak_1298	1	0.8	chr17	50914069	50914351	MACS_peak_1298	0.705	1	67.56
MACS_peak_1298	chr17-50914149-50914549	11.2385	-1.34811	0.409761	chr17	50913960	50914460	MACS_peak_1298	0.7775	0.622	chr17	50914069	50914351	MACS_peak_1298	0.505	0.716312	67.56
MACS_peak_130	chr1-150938145-150938545	15.9413	1.41777	0.409497	chr1	150938169	150938669	MACS_peak_130	0.94	0.752	chr1	150938125	150938712	MACS_peak_130	1	0.681431	75.65
MACS_peak_130	chr1-150938147-150938547	10.2999	0.162915	0.970463	chr1	150938169	150938669	MACS_peak_130	0.945	0.756	chr1	150938125	150938712	MACS_peak_130	1	0.681431	75.65
MACS_peak_130	chr1-150938137-150938537	12.6816	-0.548887	0.85658	chr1	150938169	150938669	MACS_peak_130	0.92	0.736	chr1	150938125	150938712	MACS_peak_130	1	0.681431	75.65
MACS_peak_1300	chr17-51798335-51798735	14.3874	0.54605	0.813229	chr17	51798333	51798833	MACS_peak_1300	1	0.8	chr17	51798462	51798704	MACS_peak_1300	0.605	1	64.58
MACS_peak_1300	chr17-51798334-51798734	6.14663	0.010638	0.995251	chr17	51798333	51798833	MACS_peak_1300	1	0.8	chr17	51798462	51798704	MACS_peak_1300	0.605	1	64.58
MACS_peak_1300	chr17-51798336-51798736	14.1332	-0.796898	0.665213	chr17	51798333	51798833	MACS_peak_1300	1	0.8	chr17	51798462	51798704	MACS_peak_1300	0.605	1	64.58
MACS_peak_1301	chr17-51881529-51881929	8.33164	3.40967	0.0534783	chr17	51881381	51881881	MACS_peak_1301	0.88	0.704	chr17	51881505	51881757	MACS_peak_1301	0.57	0.904762	62.16
MACS_peak_1301	chr17-51881531-51881931	18.1884	2.56823	0.107415	chr17	51881381	51881881	MACS_peak_1301	0.875	0.7	chr17	51881505	51881757	MACS_peak_1301	0.565	0.896825	62.16
MACS_peak_1301	chr17-51881429-51881829	6.60979	1.065	0.579265	chr17	51881381	51881881	MACS_peak_1301	1	0.8	chr17	51881505	51881757	MACS_peak_1301	0.63	1	62.16
MACS_peak_1301	chr17-51881428-51881828	10.4804	0.129274	0.970463	chr17	51881381	51881881	MACS_peak_1301	1	0.8	chr17	51881505	51881757	MACS_peak_1301	0.63	1	62.16
MACS_peak_1301	chr17-51881399-51881799	5.68544	0.0955583	0.970463	chr17	51881381	51881881	MACS_peak_1301	1	0.8	chr17	51881505	51881757	MACS_peak_1301	0.63	1	62.16
MACS_peak_1301	chr17-51881426-51881826	29.3502	-0.0256692	0.987052	chr17	51881381	51881881	MACS_peak_1301	1	0.8	chr17	51881505	51881757	MACS_peak_1301	0.63	1	62.16
MACS_peak_1301	chr17-51881427-51881827	9.56018	-0.330783	0.906683	chr17	51881381	51881881	MACS_peak_1301	1	0.8	chr17	51881505	51881757	MACS_peak_1301	0.63	1	62.16
MACS_peak_1301	chr17-51881433-51881833	5.68194	-2.84766	0.0994549	chr17	51881381	51881881	MACS_peak_1301	1	0.8	chr17	51881505	51881757	MACS_peak_1301	0.63	1	62.16
MACS_peak_1302	chr17-52151520-52151920	5.68544	0.0955583	0.970463	chr17	52151377	52151877	MACS_peak_1302	0.8925	0.714	chr17	52151504	52151750	MACS_peak_1302	0.575	0.934959	64
MACS_peak_1302	chr17-52151333-52151733	12.4869	-0.618951	0.793318	chr17	52151377	52151877	MACS_peak_1302	0.89	0.712	chr17	52151504	52151750	MACS_peak_1302	0.5725	0.930894	64
MACS_peak_1302	chr17-52151518-52151918	9.53193	-0.965892	0.608326	chr17	52151377	52151877	MACS_peak_1302	0.8975	0.718	chr17	52151504	52151750	MACS_peak_1302	0.58	0.943089	64
MACS_peak_1306	chr17-54124343-54124743	9.09966	2.35172	0.172567	chr17	54124340	54124840	MACS_peak_1306	1	0.8	chr17	54124501	54124678	MACS_peak_1306	0.4425	1	62.04
MACS_peak_1306	chr17-54124344-54124744	10.7271	-2.52855	0.103943	chr17	54124340	54124840	MACS_peak_1306	1	0.8	chr17	54124501	54124678	MACS_peak_1306	0.4425	1	62.04
MACS_peak_1307	chr17-54498386-54498786	8.57642	2.06798	0.276189	chr17	54498267	54498767	MACS_peak_1307	0.9525	0.762	chr17	54498400	54498633	MACS_peak_1307	0.5825	1	79.79
MACS_peak_1307	chr17-54498491-54498891	7.69119	0.975464	0.617189	chr17	54498267	54498767	MACS_peak_1307	0.69	0.552	chr17	54498400	54498633	MACS_peak_1307	0.355	0.609442	79.79
MACS_peak_1307	chr17-54498387-54498787	5.64093	-0.474039	0.846099	chr17	54498267	54498767	MACS_peak_1307	0.95	0.76	chr17	54498400	54498633	MACS_peak_1307	0.5825	1	79.79
MACS_peak_1307	chr17-54498479-54498879	10.0079	-1.69797	0.281851	chr17	54498267	54498767	MACS_peak_1307	0.72	0.576	chr17	54498400	54498633	MACS_peak_1307	0.385	0.660944	79.79
MACS_peak_1307	chr17-54498480-54498880	5.98943	-2.38195	0.17543	chr17	54498267	54498767	MACS_peak_1307	0.7175	0.574	chr17	54498400	54498633	MACS_peak_1307	0.3825	0.656652	79.79
MACS_peak_1319	chr17-57688742-57689142	8.33164	3.40967	0.0534783	chr17	57688545	57689045	MACS_peak_1319	0.7575	0.606	chr17	57688608	57688982	MACS_peak_1319	0.6	0.641711	61.17
MACS_peak_1319	chr17-57688732-57689132	5.74862	2.13667	0.26531	chr17	57688545	57689045	MACS_peak_1319	0.7825	0.626	chr17	57688608	57688982	MACS_peak_1319	0.625	0.668449	61.17
MACS_peak_1319	chr17-57688684-57689084	1549.43	0.88574	0.777696	chr17	57688545	57689045	MACS_peak_1319	0.9025	0.722	chr17	57688608	57688982	MACS_peak_1319	0.745	0.796791	61.17
MACS_peak_1319	chr17-57688698-57689098	125.404	0.136813	0.970463	chr17	57688545	57689045	MACS_peak_1319	0.8675	0.694	chr17	57688608	57688982	MACS_peak_1319	0.71	0.759358	61.17
MACS_peak_1319	chr17-57688650-57689050	5.68544	0.0955583	0.970463	chr17	57688545	57689045	MACS_peak_1319	0.9875	0.79	chr17	57688608	57688982	MACS_peak_1319	0.83	0.887701	61.17
MACS_peak_1319	chr17-57688730-57689130	57.6222	-0.143214	0.970463	chr17	57688545	57689045	MACS_peak_1319	0.7875	0.63	chr17	57688608	57688982	MACS_peak_1319	0.63	0.673797	61.17
MACS_peak_1319	chr17-57688616-57689016	11.646	-0.302568	0.906912	chr17	57688545	57689045	MACS_peak_1319	1	0.8	chr17	57688608	57688982	MACS_peak_1319	0.915	0.97861	61.17
MACS_peak_1319	chr17-57688618-57689018	13.4415	-0.75674	0.68846	chr17	57688545	57689045	MACS_peak_1319	1	0.8	chr17	57688608	57688982	MACS_peak_1319	0.91	0.973262	61.17
MACS_peak_1319	chr17-57688651-57689051	5.57126	-1.9597	0.247303	chr17	57688545	57689045	MACS_peak_1319	0.985	0.788	chr17	57688608	57688982	MACS_peak_1319	0.8275	0.885027	61.17
MACS_peak_1319	chr17-57688731-57689131	9.06211	-2.60746	0.156722	chr17	57688545	57689045	MACS_peak_1319	0.785	0.628	chr17	57688608	57688982	MACS_peak_1319	0.6275	0.671123	61.17
MACS_peak_132	chr1-151372421-151372821	6.02542	-2.94067	0.0994549	chr1	151372257	151372757	MACS_peak_132	0.84	0.672	chr1	151372299	151372714	MACS_peak_132	0.7325	0.706024	75.61
MACS_peak_1320	chr17-57752257-57752657	10.4827	-3.545	0.0272	chr17	57752300	57752800	MACS_peak_1320	0.8925	0.714	chr17	57752298	57752801	MACS_peak_1320	0.8975	0.713718	73.67
MACS_peak_1320	chr17-57752369-57752769	8.53212	3.46477	0.0534783	chr17	57752300	57752800	MACS_peak_1320	1	0.8	chr17	57752298	57752801	MACS_peak_1320	1	0.795229	73.67
MACS_peak_1320	chr17-57752457-57752857	13.12	0.655522	0.729697	chr17	57752300	57752800	MACS_peak_1320	0.8575	0.686	chr17	57752298	57752801	MACS_peak_1320	0.86	0.683897	73.67
MACS_peak_1320	chr17-57752456-57752856	8.69857	0.590401	0.809464	chr17	57752300	57752800	MACS_peak_1320	0.86	0.688	chr17	57752298	57752801	MACS_peak_1320	0.8625	0.685885	73.67
MACS_peak_1320	chr17-57752492-57752892	21.847	0.57498	0.771817	chr17	57752300	57752800	MACS_peak_1320	0.77	0.616	chr17	57752298	57752801	MACS_peak_1320	0.7725	0.614314	73.67
MACS_peak_1320	chr17-57752490-57752890	5.71055	0.141527	0.970463	chr17	57752300	57752800	MACS_peak_1320	0.775	0.62	chr17	57752298	57752801	MACS_peak_1320	0.7775	0.61829	73.67
MACS_peak_1320	chr17-57752489-57752889	5.72434	0.0993966	0.970463	chr17	57752300	57752800	MACS_peak_1320	0.7775	0.622	chr17	57752298	57752801	MACS_peak_1320	0.78	0.620278	73.67
MACS_peak_1320	chr17-57752458-57752858	61.2045	-0.139756	0.970463	chr17	57752300	57752800	MACS_peak_1320	0.855	0.684	chr17	57752298	57752801	MACS_peak_1320	0.8575	0.681909	73.67
MACS_peak_1320	chr17-57752302-57752702	17.8194	-0.246995	0.945037	chr17	57752300	57752800	MACS_peak_1320	1	0.8	chr17	57752298	57752801	MACS_peak_1320	1	0.795229	73.67
MACS_peak_1320	chr17-57752346-57752746	83.9776	-0.266675	0.946627	chr17	57752300	57752800	MACS_peak_1320	1	0.8	chr17	57752298	57752801	MACS_peak_1320	1	0.795229	73.67
MACS_peak_1320	chr17-57752488-57752888	7.30297	-0.473561	0.863467	chr17	57752300	57752800	MACS_peak_1320	0.78	0.624	chr17	57752298	57752801	MACS_peak_1320	0.7825	0.622266	73.67
MACS_peak_1320	chr17-57752281-57752681	6.93687	-0.498967	0.863467	chr17	57752300	57752800	MACS_peak_1320	0.9525	0.762	chr17	57752298	57752801	MACS_peak_1320	0.9575	0.761431	73.67
MACS_peak_1320	chr17-57752253-57752653	6.93687	-0.498967	0.863467	chr17	57752300	57752800	MACS_peak_1320	0.8825	0.706	chr17	57752298	57752801	MACS_peak_1320	0.8875	0.705765	73.67
MACS_peak_1320	chr17-57752460-57752860	7.09706	-0.592339	0.800217	chr17	57752300	57752800	MACS_peak_1320	0.85	0.68	chr17	57752298	57752801	MACS_peak_1320	0.8525	0.677932	73.67
MACS_peak_1320	chr17-57752493-57752893	19.3702	-0.66202	0.791084	chr17	57752300	57752800	MACS_peak_1320	0.7675	0.614	chr17	57752298	57752801	MACS_peak_1320	0.77	0.612326	73.67
MACS_peak_1320	chr17-57752491-57752891	10.379	-0.759116	0.686029	chr17	57752300	57752800	MACS_peak_1320	0.7725	0.618	chr17	57752298	57752801	MACS_peak_1320	0.775	0.616302	73.67
MACS_peak_1320	chr17-57752301-57752701	13.6497	-0.85849	0.649396	chr17	57752300	57752800	MACS_peak_1320	1	0.8	chr17	57752298	57752801	MACS_peak_1320	1	0.795229	73.67
MACS_peak_1320	chr17-57752494-57752894	42.0526	-0.879884	0.555549	chr17	57752300	57752800	MACS_peak_1320	0.765	0.612	chr17	57752298	57752801	MACS_peak_1320	0.7675	0.610338	73.67
MACS_peak_1320	chr17-57752462-57752862	5.57949	-0.924676	0.671656	chr17	57752300	57752800	MACS_peak_1320	0.845	0.676	chr17	57752298	57752801	MACS_peak_1320	0.8475	0.673956	73.67
MACS_peak_1320	chr17-57752251-57752651	5.74456	-0.969186	0.625994	chr17	57752300	57752800	MACS_peak_1320	0.8775	0.702	chr17	57752298	57752801	MACS_peak_1320	0.8825	0.701789	73.67
MACS_peak_1320	chr17-57752279-57752679	8.32012	-1.05007	0.576358	chr17	57752300	57752800	MACS_peak_1320	0.9475	0.758	chr17	57752298	57752801	MACS_peak_1320	0.9525	0.757455	73.67
MACS_peak_1320	chr17-57752300-57752700	19.1949	-1.25831	0.435542	chr17	57752300	57752800	MACS_peak_1320	1	0.8	chr17	57752298	57752801	MACS_peak_1320	1	0.795229	73.67
MACS_peak_1320	chr17-57752347-57752747	426.801	-1.28773	0.351059	chr17	57752300	57752800	MACS_peak_1320	1	0.8	chr17	57752298	57752801	MACS_peak_1320	1	0.795229	73.67
MACS_peak_1320	chr17-57752486-57752886	13.4968	-1.30803	0.439223	chr17	57752300	57752800	MACS_peak_1320	0.785	0.628	chr17	57752298	57752801	MACS_peak_1320	0.7875	0.626243	73.67
MACS_peak_1320	chr17-57752354-57752754	670.034	-1.42572	0.31369	chr17	57752300	57752800	MACS_peak_1320	1	0.8	chr17	57752298	57752801	MACS_peak_1320	1	0.795229	73.67
MACS_peak_1320	chr17-57752367-57752767	7.1982	-1.63522	0.391738	chr17	57752300	57752800	MACS_peak_1320	1	0.8	chr17	57752298	57752801	MACS_peak_1320	1	0.795229	73.67
MACS_peak_1320	chr17-57752256-57752656	14.8499	-1.82682	0.275135	chr17	57752300	57752800	MACS_peak_1320	0.89	0.712	chr17	57752298	57752801	MACS_peak_1320	0.895	0.71173	73.67
MACS_peak_1320	chr17-57752303-57752703	21.4708	-2.08932	0.290322	chr17	57752300	57752800	MACS_peak_1320	1	0.8	chr17	57752298	57752801	MACS_peak_1320	1	0.795229	73.67
MACS_peak_1329	chr17-58922533-58922933	459.138	7.5123	4.26771e-06	chr17	58922615	58923115	MACS_peak_1329	0.795	0.636	chr17	58922583	58923147	MACS_peak_1329	0.875	0.620567	177.8
MACS_peak_1329	chr17-58922670-58923070	10.838	3.99606	0.0142162	chr17	58922615	58923115	MACS_peak_1329	1	0.8	chr17	58922583	58923147	MACS_peak_1329	1	0.70922	177.8
MACS_peak_1329	chr17-58922537-58922937	8.33164	3.40967	0.0534783	chr17	58922615	58923115	MACS_peak_1329	0.805	0.644	chr17	58922583	58923147	MACS_peak_1329	0.885	0.62766	177.8
MACS_peak_1329	chr17-58922741-58923141	42.681	2.52658	0.0735926	chr17	58922615	58923115	MACS_peak_1329	0.935	0.748	chr17	58922583	58923147	MACS_peak_1329	1	0.70922	177.8
MACS_peak_1329	chr17-58922609-58923009	17.4032	1.97604	0.335528	chr17	58922615	58923115	MACS_peak_1329	0.985	0.788	chr17	58922583	58923147	MACS_peak_1329	1	0.70922	177.8
MACS_peak_1329	chr17-58922610-58923010	128.95	1.78094	0.293966	chr17	58922615	58923115	MACS_peak_1329	0.9875	0.79	chr17	58922583	58923147	MACS_peak_1329	1	0.70922	177.8
MACS_peak_1329	chr17-58922611-58923011	338.878	1.53419	0.285066	chr17	58922615	58923115	MACS_peak_1329	0.99	0.792	chr17	58922583	58923147	MACS_peak_1329	1	0.70922	177.8
MACS_peak_1329	chr17-58922740-58923140	18.7958	0.934265	0.654288	chr17	58922615	58923115	MACS_peak_1329	0.9375	0.75	chr17	58922583	58923147	MACS_peak_1329	1	0.70922	177.8
MACS_peak_1329	chr17-58922613-58923013	520.883	0.890162	0.538009	chr17	58922615	58923115	MACS_peak_1329	0.995	0.796	chr17	58922583	58923147	MACS_peak_1329	1	0.70922	177.8
MACS_peak_1329	chr17-58922747-58923147	9.95451	0.690411	0.762291	chr17	58922615	58923115	MACS_peak_1329	0.92	0.736	chr17	58922583	58923147	MACS_peak_1329	1	0.70922	177.8
MACS_peak_1329	chr17-58922739-58923139	50.4633	0.589172	0.791961	chr17	58922615	58923115	MACS_peak_1329	0.94	0.752	chr17	58922583	58923147	MACS_peak_1329	1	0.70922	177.8
MACS_peak_1329	chr17-58922612-58923012	1047.21	0.572521	0.717987	chr17	58922615	58923115	MACS_peak_1329	0.9925	0.794	chr17	58922583	58923147	MACS_peak_1329	1	0.70922	177.8
MACS_peak_1329	chr17-58922653-58923053	5.68544	0.0955583	0.970463	chr17	58922615	58923115	MACS_peak_1329	1	0.8	chr17	58922583	58923147	MACS_peak_1329	1	0.70922	177.8
MACS_peak_1329	chr17-58922544-58922944	6.52487	0.0372132	0.983401	chr17	58922615	58923115	MACS_peak_1329	0.8225	0.658	chr17	58922583	58923147	MACS_peak_1329	0.9025	0.640071	177.8
MACS_peak_1329	chr17-58922749-58923149	10.816	-0.0716098	0.970463	chr17	58922615	58923115	MACS_peak_1329	0.915	0.732	chr17	58922583	58923147	MACS_peak_1329	0.995	0.705674	177.8
MACS_peak_1329	chr17-58922652-58923052	5.59757	-0.287024	0.9266	chr17	58922615	58923115	MACS_peak_1329	1	0.8	chr17	58922583	58923147	MACS_peak_1329	1	0.70922	177.8
MACS_peak_1329	chr17-58922723-58923123	7.21375	-0.295676	0.931679	chr17	58922615	58923115	MACS_peak_1329	0.98	0.784	chr17	58922583	58923147	MACS_peak_1329	1	0.70922	177.8
MACS_peak_1329	chr17-58922588-58922988	155.514	-2.32807	0.248686	chr17	58922615	58923115	MACS_peak_1329	0.9325	0.746	chr17	58922583	58923147	MACS_peak_1329	1	0.70922	177.8
MACS_peak_135	chr1-151955562-151955962	9.86276	-1.0508	0.546875	chr1	151955432	151955932	MACS_peak_135	0.925	0.74	chr1	151955409	151955955	MACS_peak_135	0.9825	0.71978	63.01
MACS_peak_135	chr1-151955565-151955965	27.3777	-1.14874	0.481626	chr1	151955432	151955932	MACS_peak_135	0.9175	0.734	chr1	151955409	151955955	MACS_peak_135	0.975	0.714286	63.01
MACS_peak_135	chr1-151955564-151955964	8.11658	-1.41733	0.4025	chr1	151955432	151955932	MACS_peak_135	0.92	0.736	chr1	151955409	151955955	MACS_peak_135	0.9775	0.716117	63.01
MACS_peak_135	chr1-151955445-151955845	6.14076	-2.03591	0.191221	chr1	151955432	151955932	MACS_peak_135	1	0.8	chr1	151955409	151955955	MACS_peak_135	1	0.732601	63.01
MACS_peak_135	chr1-151955563-151955963	34.0332	-2.48451	0.0994549	chr1	151955432	151955932	MACS_peak_135	0.9225	0.738	chr1	151955409	151955955	MACS_peak_135	0.98	0.717949	63.01
MACS_peak_135	chr1-151955391-151955791	8.34338	-2.51353	0.116514	chr1	151955432	151955932	MACS_peak_135	0.8975	0.718	chr1	151955409	151955955	MACS_peak_135	0.955	0.699634	63.01
MACS_peak_135	chr1-151955596-151955996	42.7638	-2.59472	0.140364	chr1	151955432	151955932	MACS_peak_135	0.84	0.672	chr1	151955409	151955955	MACS_peak_135	0.8975	0.657509	63.01
MACS_peak_1352	chr17-60794160-60794560	45.4325	4.88699	0.000927801	chr17	60794010	60794560	MACS_peak_1352	1	0.727273	chr17	60793964	60794606	MACS_peak_1352	1	0.623053	107.82
MACS_peak_1352	chr17-60794019-60794419	49.0644	2.62437	0.0692589	chr17	60794010	60794560	MACS_peak_1352	1	0.727273	chr17	60793964	60794606	MACS_peak_1352	1	0.623053	107.82
MACS_peak_1352	chr17-60794159-60794559	28.5188	2.34221	0.0994549	chr17	60794010	60794560	MACS_peak_1352	1	0.727273	chr17	60793964	60794606	MACS_peak_1352	1	0.623053	107.82
MACS_peak_1352	chr17-60794161-60794561	19.8817	1.5224	0.391452	chr17	60794010	60794560	MACS_peak_1352	0.9975	0.725455	chr17	60793964	60794606	MACS_peak_1352	1	0.623053	107.82
MACS_peak_1354	chr17-61869599-61869999	39.1541	2.95556	0.0534783	chr17	61869636	61870136	MACS_peak_1354	0.9075	0.726	chr17	61869661	61870111	MACS_peak_1354	0.845	0.751111	67.58
MACS_peak_1354	chr17-61869685-61870085	161.194	1.29781	0.518083	chr17	61869636	61870136	MACS_peak_1354	1	0.8	chr17	61869661	61870111	MACS_peak_1354	1	0.888889	67.58
MACS_peak_1354	chr17-61869684-61870084	133.429	1.1299	0.58329	chr17	61869636	61870136	MACS_peak_1354	1	0.8	chr17	61869661	61870111	MACS_peak_1354	1	0.888889	67.58
MACS_peak_1354	chr17-61869601-61870001	299.333	0.395356	0.837306	chr17	61869636	61870136	MACS_peak_1354	0.9125	0.73	chr17	61869661	61870111	MACS_peak_1354	0.85	0.755556	67.58
MACS_peak_1354	chr17-61869769-61870169	7112.19	0.295785	0.913732	chr17	61869636	61870136	MACS_peak_1354	0.9175	0.734	chr17	61869661	61870111	MACS_peak_1354	0.855	0.76	67.58
MACS_peak_1354	chr17-61869682-61870082	185.779	0.272484	0.900269	chr17	61869636	61870136	MACS_peak_1354	1	0.8	chr17	61869661	61870111	MACS_peak_1354	1	0.888889	67.58
MACS_peak_1354	chr17-61869688-61870088	5.68544	0.0955583	0.970463	chr17	61869636	61870136	MACS_peak_1354	1	0.8	chr17	61869661	61870111	MACS_peak_1354	1	0.888889	67.58
MACS_peak_1354	chr17-61869686-61870086	9.20043	0.0833694	0.970463	chr17	61869636	61870136	MACS_peak_1354	1	0.8	chr17	61869661	61870111	MACS_peak_1354	1	0.888889	67.58
MACS_peak_1354	chr17-61869683-61870083	115.518	0.0792397	0.970463	chr17	61869636	61870136	MACS_peak_1354	1	0.8	chr17	61869661	61870111	MACS_peak_1354	1	0.888889	67.58
MACS_peak_1354	chr17-61869825-61870225	15.0766	0.0635927	0.973489	chr17	61869636	61870136	MACS_peak_1354	0.7775	0.622	chr17	61869661	61870111	MACS_peak_1354	0.715	0.635556	67.58
MACS_peak_1354	chr17-61869827-61870227	6.0623	-0.989636	0.603875	chr17	61869636	61870136	MACS_peak_1354	0.7725	0.618	chr17	61869661	61870111	MACS_peak_1354	0.71	0.631111	67.58
MACS_peak_1354	chr17-61869759-61870159	5.6604	-1.06335	0.609082	chr17	61869636	61870136	MACS_peak_1354	0.9425	0.754	chr17	61869661	61870111	MACS_peak_1354	0.88	0.782222	67.58
MACS_peak_1355	chr17-62106552-62106952	50.4013	4.59321	0.00497197	chr17	62106665	62107165	MACS_peak_1355	0.7175	0.574	chr17	62106807	62107023	MACS_peak_1355	0.3625	0.671296	64.51
MACS_peak_1355	chr17-62106558-62106958	12.8151	3.12411	0.0723689	chr17	62106665	62107165	MACS_peak_1355	0.7325	0.586	chr17	62106807	62107023	MACS_peak_1355	0.3775	0.699074	64.51
MACS_peak_1355	chr17-62106557-62106957	8.1918	2.14747	0.26888	chr17	62106665	62107165	MACS_peak_1355	0.73	0.584	chr17	62106807	62107023	MACS_peak_1355	0.375	0.694444	64.51
MACS_peak_1355	chr17-62106710-62107110	358.546	1.18485	0.357394	chr17	62106665	62107165	MACS_peak_1355	1	0.8	chr17	62106807	62107023	MACS_peak_1355	0.54	1	64.51
MACS_peak_1355	chr17-62106712-62107112	10.018	0.850657	0.734326	chr17	62106665	62107165	MACS_peak_1355	1	0.8	chr17	62106807	62107023	MACS_peak_1355	0.54	1	64.51
MACS_peak_1355	chr17-62106711-62107111	47.1978	0.634029	0.79815	chr17	62106665	62107165	MACS_peak_1355	1	0.8	chr17	62106807	62107023	MACS_peak_1355	0.54	1	64.51
MACS_peak_1355	chr17-62106560-62106960	9.13927	-0.476965	0.848811	chr17	62106665	62107165	MACS_peak_1355	0.7375	0.59	chr17	62106807	62107023	MACS_peak_1355	0.3825	0.708333	64.51
MACS_peak_1355	chr17-62106806-62107206	7.93985	-1.43317	0.448536	chr17	62106665	62107165	MACS_peak_1355	0.8975	0.718	chr17	62106807	62107023	MACS_peak_1355	0.54	1	64.51
MACS_peak_1358	chr17-64095989-64096389	20.4201	-0.0167565	0.992783	chr17	64095903	64096403	MACS_peak_1358	1	0.8	chr17	64096010	64096295	MACS_peak_1358	0.7125	1	65.72
MACS_peak_1358	chr17-64095901-64096301	8.18829	-0.592671	0.830441	chr17	64095903	64096403	MACS_peak_1358	0.995	0.796	chr17	64096010	64096295	MACS_peak_1358	0.7125	1	65.72
MACS_peak_1358	chr17-64095898-64096298	6.12694	-1.54286	0.380268	chr17	64095903	64096403	MACS_peak_1358	0.9875	0.79	chr17	64096010	64096295	MACS_peak_1358	0.7125	1	65.72
MACS_peak_1366	chr17-67357333-67357733	174.815	-0.588575	0.830441	chr17	67357301	67357801	MACS_peak_1366	1	0.8	chr17	67357431	67357671	MACS_peak_1366	0.6	1	64.88
MACS_peak_1366	chr17-67357332-67357732	54.9975	-0.715774	0.692578	chr17	67357301	67357801	MACS_peak_1366	1	0.8	chr17	67357431	67357671	MACS_peak_1366	0.6	1	64.88
MACS_peak_1366	chr17-67357331-67357731	86.5756	-0.996535	0.453455	chr17	67357301	67357801	MACS_peak_1366	1	0.8	chr17	67357431	67357671	MACS_peak_1366	0.6	1	64.88
MACS_peak_1370	chr17-68685459-68685859	20.0494	3.48064	0.0534783	chr17	68685354	68685854	MACS_peak_1370	0.9875	0.79	chr17	68685490	68685718	MACS_peak_1370	0.57	1	60.97
MACS_peak_1370	chr17-68685525-68685925	42.5922	0.884916	0.684627	chr17	68685354	68685854	MACS_peak_1370	0.8225	0.658	chr17	68685490	68685718	MACS_peak_1370	0.4825	0.846491	60.97
MACS_peak_1370	chr17-68685527-68685927	37.2332	0.550727	0.809253	chr17	68685354	68685854	MACS_peak_1370	0.8175	0.654	chr17	68685490	68685718	MACS_peak_1370	0.4775	0.837719	60.97
MACS_peak_1370	chr17-68685532-68685932	21.6141	-0.677618	0.81926	chr17	68685354	68685854	MACS_peak_1370	0.805	0.644	chr17	68685490	68685718	MACS_peak_1370	0.465	0.815789	60.97
MACS_peak_1370	chr17-68685457-68685857	41.5525	-1.12934	0.501447	chr17	68685354	68685854	MACS_peak_1370	0.9925	0.794	chr17	68685490	68685718	MACS_peak_1370	0.57	1	60.97
MACS_peak_1370	chr17-68685531-68685931	6.31241	-1.35886	0.460067	chr17	68685354	68685854	MACS_peak_1370	0.8075	0.646	chr17	68685490	68685718	MACS_peak_1370	0.4675	0.820175	60.97
MACS_peak_1370	chr17-68685533-68685933	7.80598	-1.69386	0.292082	chr17	68685354	68685854	MACS_peak_1370	0.8025	0.642	chr17	68685490	68685718	MACS_peak_1370	0.4625	0.811404	60.97
MACS_peak_1373	chr17-71467036-71467436	5.75102	-1.18476	0.545448	chr17	71467099	71467599	MACS_peak_1373	0.8425	0.674	chr17	71467221	71467477	MACS_peak_1373	0.5375	0.839844	66.63
MACS_peak_1374	chr17-71610518-71610918	14.4677	1.10376	0.618621	chr17	71610368	71610868	MACS_peak_1374	0.875	0.7	chr17	71610518	71610717	MACS_peak_1374	0.4975	1	100.98
MACS_peak_1398	chr17-79817088-79817488	5.69461	-2.37659	0.149474	chr17	79816884	79817384	MACS_peak_1398	0.74	0.592	chr17	79816990	79817277	MACS_peak_1398	0.4725	0.658537	60.91
MACS_peak_1411	chr18-7035102-7035502	1349.33	8.90617	4.40013e-12	chr18	7034987	7035487	MACS_peak_1411	0.9625	0.77	chr18	7035106	7035368	MACS_peak_1411	0.655	1	105.34
MACS_peak_1411	chr18-7034913-7035313	14.4526	3.01316	0.0534783	chr18	7034987	7035487	MACS_peak_1411	0.815	0.652	chr18	7035106	7035368	MACS_peak_1411	0.5175	0.790076	105.34
MACS_peak_1411	chr18-7034880-7035280	13.0291	2.5054	0.0998269	chr18	7034987	7035487	MACS_peak_1411	0.7325	0.586	chr18	7035106	7035368	MACS_peak_1411	0.435	0.664122	105.34
MACS_peak_1411	chr18-7034911-7035311	23.672	1.85503	0.237251	chr18	7034987	7035487	MACS_peak_1411	0.81	0.648	chr18	7035106	7035368	MACS_peak_1411	0.5125	0.782443	105.34
MACS_peak_1411	chr18-7034879-7035279	11.7198	1.79584	0.257582	chr18	7034987	7035487	MACS_peak_1411	0.73	0.584	chr18	7035106	7035368	MACS_peak_1411	0.4325	0.660305	105.34
MACS_peak_1411	chr18-7034878-7035278	7.55136	1.52773	0.421087	chr18	7034987	7035487	MACS_peak_1411	0.7275	0.582	chr18	7035106	7035368	MACS_peak_1411	0.43	0.656489	105.34
MACS_peak_1411	chr18-7034877-7035277	12.5786	0.851422	0.650232	chr18	7034987	7035487	MACS_peak_1411	0.725	0.58	chr18	7035106	7035368	MACS_peak_1411	0.4275	0.652672	105.34
MACS_peak_1411	chr18-7034881-7035281	15.009	0.0883907	0.970463	chr18	7034987	7035487	MACS_peak_1411	0.735	0.588	chr18	7035106	7035368	MACS_peak_1411	0.4375	0.667939	105.34
MACS_peak_1411	chr18-7034912-7035312	10.2286	-0.487577	0.858754	chr18	7034987	7035487	MACS_peak_1411	0.8125	0.65	chr18	7035106	7035368	MACS_peak_1411	0.515	0.78626	105.34
MACS_peak_1413	chr18-7728491-7728891	43.7846	2.29209	0.129467							chr18	7728503	7728714	MACS_peak_1413	0.5275	1	58.71
MACS_peak_1413	chr18-7728493-7728893	34.9677	1.48716	0.30563							chr18	7728503	7728714	MACS_peak_1413	0.5275	1	58.71
MACS_peak_1413	chr18-7728490-7728890	16.5378	1.35705	0.447357							chr18	7728503	7728714	MACS_peak_1413	0.5275	1	58.71
MACS_peak_1413	chr18-7728492-7728892	15.5893	1.12943	0.514497							chr18	7728503	7728714	MACS_peak_1413	0.5275	1	58.71
MACS_peak_1413	chr18-7728312-7728712	6.09023	-0.0312965	0.985938							chr18	7728503	7728714	MACS_peak_1413	0.5225	0.990521	58.71
MACS_peak_1422	chr18-20857318-20857718	24.3602	3.90508	0.0114381	chr18	20857279	20857779	MACS_peak_1422	1	0.8	chr18	20857417	20857640	MACS_peak_1422	0.5575	1	67.56
MACS_peak_1422	chr18-20857317-20857717	11.5019	2.37356	0.218519	chr18	20857279	20857779	MACS_peak_1422	1	0.8	chr18	20857417	20857640	MACS_peak_1422	0.5575	1	67.56
MACS_peak_1422	chr18-20857316-20857716	99.1949	2.0738	0.162859	chr18	20857279	20857779	MACS_peak_1422	1	0.8	chr18	20857417	20857640	MACS_peak_1422	0.5575	1	67.56
MACS_peak_1423	chr18-23112901-23113301	18.7713	3.97451	0.016401							chr18	23113114	23113364	MACS_peak_1423	0.4675	0.748	53.35
MACS_peak_1423	chr18-23112900-23113300	13.7671	1.63907	0.336941							chr18	23113114	23113364	MACS_peak_1423	0.465	0.744	53.35
MACS_peak_1423	chr18-23112898-23113298	16.7561	0.780305	0.698724							chr18	23113114	23113364	MACS_peak_1423	0.46	0.736	53.35
MACS_peak_1423	chr18-23112899-23113299	8.34248	0.554277	0.823314							chr18	23113114	23113364	MACS_peak_1423	0.4625	0.74	53.35
MACS_peak_1429	chr18-44203237-44203637	7.93212	0.0936545	0.970463	chr18	44203235	44203735	MACS_peak_1429	1	0.8	chr18	44203364	44203605	MACS_peak_1429	0.6025	1	75.41
MACS_peak_143	chr1-154865437-154865837	6.97855	-1.59727	0.415833	chr1	154865293	154865793	MACS_peak_143	0.89	0.712	chr1	154865438	154865648	MACS_peak_143	0.525	1	80.95
MACS_peak_1432	chr18-52902087-52902487	128.49	-0.161793	0.970463	chr18	52901991	52902491	MACS_peak_1432	1	0.8	chr18	52902122	52902360	MACS_peak_1432	0.595	1	65.18
MACS_peak_1432	chr18-52902086-52902486	62.6353	-1.03746	0.535882	chr18	52901991	52902491	MACS_peak_1432	1	0.8	chr18	52902122	52902360	MACS_peak_1432	0.595	1	65.18
MACS_peak_1432	chr18-52902085-52902485	65.1098	-1.26683	0.512778	chr18	52901991	52902491	MACS_peak_1432	1	0.8	chr18	52902122	52902360	MACS_peak_1432	0.595	1	65.18
MACS_peak_1432	chr18-52902089-52902489	200.953	-1.30291	0.271548	chr18	52901991	52902491	MACS_peak_1432	1	0.8	chr18	52902122	52902360	MACS_peak_1432	0.595	1	65.18
MACS_peak_1432	chr18-52902088-52902488	137.843	-1.81701	0.0994549	chr18	52901991	52902491	MACS_peak_1432	1	0.8	chr18	52902122	52902360	MACS_peak_1432	0.595	1	65.18
MACS_peak_1434	chr18-57566602-57567002	197.301	5.50088	0.00095646	chr18	57566701	57567201	MACS_peak_1434	0.7525	0.602	chr18	57566751	57567151	MACS_peak_1434	0.6275	0.6275	124.87
MACS_peak_1434	chr18-57566622-57567022	304.616	2.86006	0.0739783	chr18	57566701	57567201	MACS_peak_1434	0.8025	0.642	chr18	57566751	57567151	MACS_peak_1434	0.6775	0.6775	124.87
MACS_peak_1434	chr18-57566621-57567021	155.342	1.18481	0.56261	chr18	57566701	57567201	MACS_peak_1434	0.8	0.64	chr18	57566751	57567151	MACS_peak_1434	0.675	0.675	124.87
MACS_peak_1434	chr18-57566620-57567020	465.086	1.18058	0.405886	chr18	57566701	57567201	MACS_peak_1434	0.7975	0.638	chr18	57566751	57567151	MACS_peak_1434	0.6725	0.6725	124.87
MACS_peak_1436	chr18-60239772-60240172	1085.52	8.76881	1.18923e-18	chr18	60239671	60240171	MACS_peak_1436	0.9975	0.798	chr18	60239774	60240068	MACS_peak_1436	0.735	1	110.56
MACS_peak_1436	chr18-60239773-60240173	22.0364	2.84884	0.128945	chr18	60239671	60240171	MACS_peak_1436	0.995	0.796	chr18	60239774	60240068	MACS_peak_1436	0.735	1	110.56
MACS_peak_1436	chr18-60239616-60240016	21.9772	2.81037	0.0994549	chr18	60239671	60240171	MACS_peak_1436	0.8625	0.69	chr18	60239774	60240068	MACS_peak_1436	0.605	0.823129	110.56
MACS_peak_1436	chr18-60239552-60239952	8.18825	2.56485	0.137776	chr18	60239671	60240171	MACS_peak_1436	0.7025	0.562	chr18	60239774	60240068	MACS_peak_1436	0.445	0.605442	110.56
MACS_peak_1436	chr18-60239554-60239954	27.7485	2.34074	0.104071	chr18	60239671	60240171	MACS_peak_1436	0.7075	0.566	chr18	60239774	60240068	MACS_peak_1436	0.45	0.612245	110.56
MACS_peak_1436	chr18-60239615-60240015	128.106	0.866642	0.616089	chr18	60239671	60240171	MACS_peak_1436	0.86	0.688	chr18	60239774	60240068	MACS_peak_1436	0.6025	0.819728	110.56
MACS_peak_1436	chr18-60239617-60240017	44.984	0.855667	0.691315	chr18	60239671	60240171	MACS_peak_1436	0.865	0.692	chr18	60239774	60240068	MACS_peak_1436	0.6075	0.826531	110.56
MACS_peak_1446	chr18-73440115-73440515	5.81528	1.59546	0.444703	chr18	73440005	73440505	MACS_peak_1446	0.975	0.78	chr18	73440141	73440369	MACS_peak_1446	0.57	1	66.72
MACS_peak_1446	chr18-73440116-73440516	6.80366	-1.06892	0.545596	chr18	73440005	73440505	MACS_peak_1446	0.9725	0.778	chr18	73440141	73440369	MACS_peak_1446	0.57	1	66.72
MACS_peak_1452	chr18-77890069-77890469	2955	8.82186	1.26743e-17	chr18	77889896	77890396	MACS_peak_1452	0.8175	0.654	chr18	77890014	77890278	MACS_peak_1452	0.5225	0.791667	166.37
MACS_peak_1452	chr18-77890117-77890517	610.235	3.66131	0.0236728	chr18	77889896	77890396	MACS_peak_1452	0.6975	0.558	chr18	77890014	77890278	MACS_peak_1452	0.4025	0.609848	166.37
MACS_peak_1452	chr18-77889807-77890207	37.8848	2.85227	0.0534783	chr18	77889896	77890396	MACS_peak_1452	0.7775	0.622	chr18	77890014	77890278	MACS_peak_1452	0.4825	0.731061	166.37
MACS_peak_1452	chr18-77889809-77890209	22.92	2.41527	0.11446	chr18	77889896	77890396	MACS_peak_1452	0.7825	0.626	chr18	77890014	77890278	MACS_peak_1452	0.4875	0.738636	166.37
MACS_peak_1452	chr18-77890115-77890515	881.913	2.07628	0.0908331	chr18	77889896	77890396	MACS_peak_1452	0.7025	0.562	chr18	77890014	77890278	MACS_peak_1452	0.4075	0.617424	166.37
MACS_peak_1452	chr18-77889774-77890174	36.7892	-0.564647	0.820812	chr18	77889896	77890396	MACS_peak_1452	0.695	0.556	chr18	77890014	77890278	MACS_peak_1452	0.4	0.606061	166.37
MACS_peak_1452	chr18-77889775-77890175	10.1921	-3.54852	0.0534783	chr18	77889896	77890396	MACS_peak_1452	0.6975	0.558	chr18	77890014	77890278	MACS_peak_1452	0.4025	0.609848	166.37
MACS_peak_1476	chr19-6577363-6577763	33.719	4.347	0.00531372	chr19	6577322	6577822	MACS_peak_1476	1	0.8	chr19	6577308	6577836	MACS_peak_1476	1	0.757576	187.88
MACS_peak_1476	chr19-6577361-6577761	10.7018	3.42669	0.0397047	chr19	6577322	6577822	MACS_peak_1476	1	0.8	chr19	6577308	6577836	MACS_peak_1476	1	0.757576	187.88
MACS_peak_1476	chr19-6577362-6577762	22.5636	3.12949	0.0386565	chr19	6577322	6577822	MACS_peak_1476	1	0.8	chr19	6577308	6577836	MACS_peak_1476	1	0.757576	187.88
MACS_peak_1476	chr19-6577360-6577760	21.7642	1.57966	0.32181	chr19	6577322	6577822	MACS_peak_1476	1	0.8	chr19	6577308	6577836	MACS_peak_1476	1	0.757576	187.88
MACS_peak_1482	chr19-11728143-11728543	5.68544	0.0955583	0.970463	chr19	11728132	11728632	MACS_peak_1482	1	0.8	chr19	11728243	11728521	MACS_peak_1482	0.695	1	61.06
MACS_peak_1485	chr19-13051157-13051557	1334.73	1.07763	0.32331	chr19	13051141	13051691	MACS_peak_1485	1	0.727273	chr19	13051091	13051741	MACS_peak_1485	1	0.615385	184.01
MACS_peak_1488	chr19-13727204-13727604	10.4385	2.08764	0.291887	chr19	13727094	13727594	MACS_peak_1488	0.975	0.78	chr19	13727226	13727461	MACS_peak_1488	0.5875	1	65.63
MACS_peak_1488	chr19-13727213-13727613	5.78394	0.439361	0.862468	chr19	13727094	13727594	MACS_peak_1488	0.9525	0.762	chr19	13727226	13727461	MACS_peak_1488	0.5875	1	65.63
MACS_peak_1488	chr19-13727209-13727609	6.46832	-1.89618	0.256106	chr19	13727094	13727594	MACS_peak_1488	0.9625	0.77	chr19	13727226	13727461	MACS_peak_1488	0.5875	1	65.63
MACS_peak_1500	chr19-30498197-30498597	12.8322	0.547225	0.831564	chr19	30498200	30498700	MACS_peak_1500	0.9925	0.794	chr19	30498341	30498559	MACS_peak_1500	0.545	1	93.34
MACS_peak_1500	chr19-30498195-30498595	10.6162	-0.24821	0.934048	chr19	30498200	30498700	MACS_peak_1500	0.9875	0.79	chr19	30498341	30498559	MACS_peak_1500	0.545	1	93.34
MACS_peak_1500	chr19-30498196-30498596	14.8184	-0.639807	0.827849	chr19	30498200	30498700	MACS_peak_1500	0.99	0.792	chr19	30498341	30498559	MACS_peak_1500	0.545	1	93.34
MACS_peak_1504	chr19-35707330-35707730	7.18242	-2.03993	0.264053	chr19	35707340	35707840	MACS_peak_1504	0.975	0.78	chr19	35707468	35707712	MACS_peak_1504	0.61	1	61.8
MACS_peak_1509	chr19-38782434-38782834	14.6819	-4.31445	0.00593398	chr19	38782517	38783017	MACS_peak_1509	0.7925	0.634	chr19	38782491	38783043	MACS_peak_1509	0.8575	0.621377	167.59
MACS_peak_151	chr1-157938451-157938851	267.788	-0.107121	0.970463	chr1	157938522	157939022	MACS_peak_151	0.8225	0.658	chr1	157938712	157938831	MACS_peak_151	0.2975	1	88.92
MACS_peak_151	chr1-157938448-157938848	4191.35	-0.743824	0.590067	chr1	157938522	157939022	MACS_peak_151	0.815	0.652	chr1	157938712	157938831	MACS_peak_151	0.2975	1	88.92
MACS_peak_151	chr1-157938673-157939073	1594.32	-0.816888	0.805789	chr1	157938522	157939022	MACS_peak_151	0.8725	0.698	chr1	157938712	157938831	MACS_peak_151	0.2975	1	88.92
MACS_peak_1518	chr19-42034595-42034995	20.5268	4.40503	0.0170176	chr19	42034500	42035000	MACS_peak_1518	1	0.8	chr19	42034581	42034918	MACS_peak_1518	0.8075	0.958457	144.79
MACS_peak_1518	chr19-42034538-42034938	33.4951	3.63387	0.0254645	chr19	42034500	42035000	MACS_peak_1518	1	0.8	chr19	42034581	42034918	MACS_peak_1518	0.8425	1	144.79
MACS_peak_1518	chr19-42034537-42034937	22.0364	2.84884	0.128945	chr19	42034500	42035000	MACS_peak_1518	1	0.8	chr19	42034581	42034918	MACS_peak_1518	0.8425	1	144.79
MACS_peak_1518	chr19-42034540-42034940	54.2244	2.41058	0.0994549	chr19	42034500	42035000	MACS_peak_1518	1	0.8	chr19	42034581	42034918	MACS_peak_1518	0.8425	1	144.79
MACS_peak_1518	chr19-42034539-42034939	29.0096	1.9576	0.188122	chr19	42034500	42035000	MACS_peak_1518	1	0.8	chr19	42034581	42034918	MACS_peak_1518	0.8425	1	144.79
MACS_peak_1518	chr19-42034605-42035005	62.8126	-2.01737	0.281922	chr19	42034500	42035000	MACS_peak_1518	0.9875	0.79	chr19	42034581	42034918	MACS_peak_1518	0.7825	0.928783	144.79
MACS_peak_1525	chr19-47112743-47113143	12.6984	-1.35993	0.529477	chr19	47112809	47113309	MACS_peak_1525	0.835	0.668	chr19	47112806	47113312	MACS_peak_1525	0.8425	0.666008	68.96
MACS_peak_1525	chr19-47112736-47113136	10.1921	-3.54852	0.0534783	chr19	47112809	47113309	MACS_peak_1525	0.8175	0.654	chr19	47112806	47113312	MACS_peak_1525	0.825	0.652174	68.96
MACS_peak_1529	chr19-47735638-47736038	17.6587	3.91338	0.0236728	chr19	47735593	47736093	MACS_peak_1529	1	0.8	chr19	47735671	47736014	MACS_peak_1529	0.8575	1	78.75
MACS_peak_1529	chr19-47735637-47736037	7.93702	-3.49766	0.0368875	chr19	47735593	47736093	MACS_peak_1529	1	0.8	chr19	47735671	47736014	MACS_peak_1529	0.8575	1	78.75
MACS_peak_1529	chr19-47735623-47736023	125.952	1.50021	0.348185	chr19	47735593	47736093	MACS_peak_1529	1	0.8	chr19	47735671	47736014	MACS_peak_1529	0.8575	1	78.75
MACS_peak_1529	chr19-47735624-47736024	128.728	0.951435	0.658702	chr19	47735593	47736093	MACS_peak_1529	1	0.8	chr19	47735671	47736014	MACS_peak_1529	0.8575	1	78.75
MACS_peak_1529	chr19-47735622-47736022	154.124	0.942528	0.481984	chr19	47735593	47736093	MACS_peak_1529	1	0.8	chr19	47735671	47736014	MACS_peak_1529	0.8575	1	78.75
MACS_peak_1529	chr19-47735621-47736021	144.987	0.568602	0.710311	chr19	47735593	47736093	MACS_peak_1529	1	0.8	chr19	47735671	47736014	MACS_peak_1529	0.8575	1	78.75
MACS_peak_1529	chr19-47735636-47736036	35.2021	-0.548178	0.819683	chr19	47735593	47736093	MACS_peak_1529	1	0.8	chr19	47735671	47736014	MACS_peak_1529	0.8575	1	78.75
MACS_peak_1533	chr19-50000286-50000686	6.65312	-1.07181	0.630553	chr19	50000293	50000793	MACS_peak_1533	0.9825	0.786	chr19	50000453	50000632	MACS_peak_1533	0.4475	1	60.2
MACS_peak_1533	chr19-50000287-50000687	29.3052	-1.73546	0.369232	chr19	50000293	50000793	MACS_peak_1533	0.985	0.788	chr19	50000453	50000632	MACS_peak_1533	0.4475	1	60.2
MACS_peak_1533	chr19-50000285-50000685	14.6595	-2.58853	0.0854051	chr19	50000293	50000793	MACS_peak_1533	0.98	0.784	chr19	50000453	50000632	MACS_peak_1533	0.4475	1	60.2
MACS_peak_1540	chr19-53798351-53798751	113.457	4.70868	0.000886884	chr19	53798307	53798807	MACS_peak_1540	1	0.8	chr19	53798258	53798856	MACS_peak_1540	1	0.668896	355.62
MACS_peak_1540	chr19-53798352-53798752	133.749	3.07973	0.0534783	chr19	53798307	53798807	MACS_peak_1540	1	0.8	chr19	53798258	53798856	MACS_peak_1540	1	0.668896	355.62
MACS_peak_1540	chr19-53798350-53798750	105.423	2.89769	0.0511106	chr19	53798307	53798807	MACS_peak_1540	1	0.8	chr19	53798258	53798856	MACS_peak_1540	1	0.668896	355.62
MACS_peak_1540	chr19-53798349-53798749	194.324	2.84679	0.0534783	chr19	53798307	53798807	MACS_peak_1540	1	0.8	chr19	53798258	53798856	MACS_peak_1540	1	0.668896	355.62
MACS_peak_1540	chr19-53798333-53798733	17.3891	2.7455	0.0923242	chr19	53798307	53798807	MACS_peak_1540	1	0.8	chr19	53798258	53798856	MACS_peak_1540	1	0.668896	355.62
MACS_peak_1540	chr19-53798340-53798740	14.9318	2.22694	0.203362	chr19	53798307	53798807	MACS_peak_1540	1	0.8	chr19	53798258	53798856	MACS_peak_1540	1	0.668896	355.62
MACS_peak_1540	chr19-53798341-53798741	6.15646	0.636545	0.781573	chr19	53798307	53798807	MACS_peak_1540	1	0.8	chr19	53798258	53798856	MACS_peak_1540	1	0.668896	355.62
MACS_peak_1540	chr19-53798332-53798732	5.68544	0.0955583	0.970463	chr19	53798307	53798807	MACS_peak_1540	1	0.8	chr19	53798258	53798856	MACS_peak_1540	1	0.668896	355.62
MACS_peak_1543	chr19-55855907-55856307	8.9334	-1.17333	0.570195	chr19	55855915	55856415	MACS_peak_1543	0.98	0.784	chr19	55855930	55856400	MACS_peak_1543	0.9425	0.802128	156.14
MACS_peak_1543	chr19-55855906-55856306	6.94527	-1.27852	0.542041	chr19	55855915	55856415	MACS_peak_1543	0.9775	0.782	chr19	55855930	55856400	MACS_peak_1543	0.94	0.8	156.14
MACS_peak_1549	chr19-58264307-58264707	10.5174	-1.01702	0.625723	chr19	58264378	58264878	MACS_peak_1549	0.8225	0.658	chr19	58264480	58264775	MACS_peak_1549	0.5675	0.769492	65.62
MACS_peak_1549	chr19-58264309-58264709	13.6665	-1.53827	0.307135	chr19	58264378	58264878	MACS_peak_1549	0.8275	0.662	chr19	58264480	58264775	MACS_peak_1549	0.5725	0.776271	65.62
MACS_peak_155	chr1-163787748-163788148	6.69318	-1.1294	0.52202	chr1	163787783	163788283	MACS_peak_155	0.9125	0.73	chr1	163787906	163788160	MACS_peak_155	0.605	0.952756	62.86
MACS_peak_155	chr1-163787747-163788147	10.1921	-3.54852	0.0534783	chr1	163787783	163788283	MACS_peak_155	0.91	0.728	chr1	163787906	163788160	MACS_peak_155	0.6025	0.948819	62.86
MACS_peak_1554	chr2-1177606-1178006	5.69209	-2.87187	0.0994549	chr2	1177640	1178140	MACS_peak_1554	0.915	0.732	chr2	1177779	1178001	MACS_peak_1554	0.555	1	67.68
MACS_peak_1554	chr2-1177605-1178005	26.6246	-3.14936	0.0647662	chr2	1177640	1178140	MACS_peak_1554	0.9125	0.73	chr2	1177779	1178001	MACS_peak_1554	0.555	1	67.68
MACS_peak_1558	chr2-1730664-1731064	10.5156	0.096997	0.970463	chr2	1730732	1731232	MACS_peak_1558	0.83	0.664	chr2	1730848	1731115	MACS_peak_1558	0.54	0.808989	61.38
MACS_peak_1558	chr2-1730720-1731120	7.93212	0.0936545	0.970463	chr2	1730732	1731232	MACS_peak_1558	0.97	0.776	chr2	1730848	1731115	MACS_peak_1558	0.6675	1	61.38
MACS_peak_1558	chr2-1730666-1731066	6.65989	-1.09053	0.621041	chr2	1730732	1731232	MACS_peak_1558	0.835	0.668	chr2	1730848	1731115	MACS_peak_1558	0.545	0.816479	61.38
MACS_peak_1558	chr2-1730667-1731067	8.57397	-1.60011	0.320326	chr2	1730732	1731232	MACS_peak_1558	0.8375	0.67	chr2	1730848	1731115	MACS_peak_1558	0.5475	0.820225	61.38
MACS_peak_1558	chr2-1730659-1731059	10.1753	-2.54318	0.175178	chr2	1730732	1731232	MACS_peak_1558	0.8175	0.654	chr2	1730848	1731115	MACS_peak_1558	0.5275	0.790262	61.38
MACS_peak_1560	chr2-2658736-2659136	36.612	0.647733	0.788202	chr2	2658820	2659320	MACS_peak_1560	0.79	0.632	chr2	2658982	2659158	MACS_peak_1560	0.385	0.875	61.85
MACS_peak_1560	chr2-2658735-2659135	11.4984	-0.226786	0.970463	chr2	2658820	2659320	MACS_peak_1560	0.7875	0.63	chr2	2658982	2659158	MACS_peak_1560	0.3825	0.869318	61.85
MACS_peak_1560	chr2-2658738-2659138	39.1692	-0.235931	0.925573	chr2	2658820	2659320	MACS_peak_1560	0.795	0.636	chr2	2658982	2659158	MACS_peak_1560	0.39	0.886364	61.85
MACS_peak_1560	chr2-2658737-2659137	23.943	-0.915236	0.583381	chr2	2658820	2659320	MACS_peak_1560	0.7925	0.634	chr2	2658982	2659158	MACS_peak_1560	0.3875	0.880682	61.85
MACS_peak_1560	chr2-2658983-2659383	8.38097	-1.45207	0.374968	chr2	2658820	2659320	MACS_peak_1560	0.8425	0.674	chr2	2658982	2659158	MACS_peak_1560	0.4375	0.994318	61.85
MACS_peak_1566	chr2-7606655-7607055	29.036	0.509992	0.849716	chr2	7606629	7607129	MACS_peak_1566	1	0.8	chr2	7606704	7607053	MACS_peak_1566	0.8725	1	60.84
MACS_peak_1566	chr2-7606653-7607053	121.807	-0.300293	0.874938	chr2	7606629	7607129	MACS_peak_1566	1	0.8	chr2	7606704	7607053	MACS_peak_1566	0.8725	1	60.84
MACS_peak_1566	chr2-7606654-7607054	14.4093	-1.3416	0.402958	chr2	7606629	7607129	MACS_peak_1566	1	0.8	chr2	7606704	7607053	MACS_peak_1566	0.8725	1	60.84
MACS_peak_157	chr1-168223001-168223401	6.76773	0.531285	0.854174	chr1	168222949	168223449	MACS_peak_157	1	0.8	chr1	168223060	168223337	MACS_peak_157	0.6925	1	69.87
MACS_peak_157	chr1-168223003-168223403	8.9481	-1.7349	0.293049	chr1	168222949	168223449	MACS_peak_157	1	0.8	chr1	168223060	168223337	MACS_peak_157	0.6925	1	69.87
MACS_peak_157	chr1-168223002-168223402	7.4241	-2.93222	0.0994549	chr1	168222949	168223449	MACS_peak_157	1	0.8	chr1	168223060	168223337	MACS_peak_157	0.6925	1	69.87
MACS_peak_1576	chr2-14428102-14428502	34.3489	2.8138	0.0534783	chr2	14428105	14428605	MACS_peak_1576	0.9925	0.794	chr2	14428164	14428545	MACS_peak_1576	0.845	0.887139	136.69
MACS_peak_1579	chr2-17205808-17206208	9.80302	2.59425	0.160469	chr2	17205702	17206202	MACS_peak_1579	0.985	0.788	chr2	17205827	17206077	MACS_peak_1579	0.625	1	73.94
MACS_peak_1579	chr2-17205809-17206209	13.6966	1.74671	0.305392	chr2	17205702	17206202	MACS_peak_1579	0.9825	0.786	chr2	17205827	17206077	MACS_peak_1579	0.625	1	73.94
MACS_peak_1579	chr2-17205807-17206207	31.1522	0.186417	0.970463	chr2	17205702	17206202	MACS_peak_1579	0.9875	0.79	chr2	17205827	17206077	MACS_peak_1579	0.625	1	73.94
MACS_peak_1579	chr2-17205810-17206210	11.5601	0.141587	0.970463	chr2	17205702	17206202	MACS_peak_1579	0.98	0.784	chr2	17205827	17206077	MACS_peak_1579	0.625	1	73.94
MACS_peak_1579	chr2-17205835-17206235	6.74313	-0.864155	0.646332	chr2	17205702	17206202	MACS_peak_1579	0.9175	0.734	chr2	17205827	17206077	MACS_peak_1579	0.605	0.968	73.94
MACS_peak_1580	chr2-17881532-17881932	158.348	2.95389	0.0088542	chr2	17881435	17881935	MACS_peak_1580	1	0.8	chr2	17881536	17881833	MACS_peak_1580	0.7425	1	87.8
MACS_peak_1582	chr2-17996896-17997296	43.0882	4.21051	0.00597624	chr2	17996880	17997380	MACS_peak_1582	1	0.8	chr2	17996964	17997295	MACS_peak_1582	0.8275	1	138.38
MACS_peak_1582	chr2-17996935-17997335	17.578	3.55063	0.0534783	chr2	17996880	17997380	MACS_peak_1582	1	0.8	chr2	17996964	17997295	MACS_peak_1582	0.8275	1	138.38
MACS_peak_1582	chr2-17996933-17997333	12.652	2.8477	0.0621268	chr2	17996880	17997380	MACS_peak_1582	1	0.8	chr2	17996964	17997295	MACS_peak_1582	0.8275	1	138.38
MACS_peak_1582	chr2-17996931-17997331	15.4773	1.00998	0.556682	chr2	17996880	17997380	MACS_peak_1582	1	0.8	chr2	17996964	17997295	MACS_peak_1582	0.8275	1	138.38
MACS_peak_1582	chr2-17996932-17997332	17.9333	0.992363	0.57525	chr2	17996880	17997380	MACS_peak_1582	1	0.8	chr2	17996964	17997295	MACS_peak_1582	0.8275	1	138.38
MACS_peak_1583	chr2-18216254-18216654	8.28015	0.638497	0.781573	chr2	18216211	18216711	MACS_peak_1583	1	0.8	chr2	18216326	18216596	MACS_peak_1583	0.675	1	60.69
MACS_peak_1583	chr2-18216255-18216655	8.23835	-0.805348	0.737914	chr2	18216211	18216711	MACS_peak_1583	1	0.8	chr2	18216326	18216596	MACS_peak_1583	0.675	1	60.69
MACS_peak_1583	chr2-18216253-18216653	14.5566	-0.830199	0.649043	chr2	18216211	18216711	MACS_peak_1583	1	0.8	chr2	18216326	18216596	MACS_peak_1583	0.675	1	60.69
MACS_peak_1586	chr2-19428535-19428935	19.8863	4.02245	0.0106344	chr2	19428469	19428969	MACS_peak_1586	1	0.8	chr2	19428419	19429018	MACS_peak_1586	1	0.66778	104.76
MACS_peak_1586	chr2-19428642-19429042	29.3707	3.42069	0.0261081	chr2	19428469	19428969	MACS_peak_1586	0.8175	0.654	chr2	19428419	19429018	MACS_peak_1586	0.94	0.627713	104.76
MACS_peak_1586	chr2-19428537-19428937	15.7397	2.71966	0.0678436	chr2	19428469	19428969	MACS_peak_1586	1	0.8	chr2	19428419	19429018	MACS_peak_1586	1	0.66778	104.76
MACS_peak_16	chr1-10804769-10805169	21.6852	-1.29333	0.55195	chr1	10804627	10805127	MACS_peak_16	0.895	0.716	chr1	10804745	10805009	MACS_peak_16	0.6	0.909091	70.34
MACS_peak_16	chr1-10804745-10805145	44.0251	-2.69042	0.156866	chr1	10804627	10805127	MACS_peak_16	0.955	0.764	chr1	10804745	10805009	MACS_peak_16	0.66	1	70.34
MACS_peak_1600	chr2-28395146-28395546	8.15324	1.36504	0.507892	chr2	28395104	28395604	MACS_peak_1600	1	0.8	chr2	28395085	28395623	MACS_peak_1600	1	0.743494	178.05
MACS_peak_1600	chr2-28395103-28395503	5.8772	0.991472	0.597728	chr2	28395104	28395604	MACS_peak_1600	0.9975	0.798	chr2	28395085	28395623	MACS_peak_1600	1	0.743494	178.05
MACS_peak_1600	chr2-28395010-28395410	8.79164	0.165012	0.970463	chr2	28395104	28395604	MACS_peak_1600	0.765	0.612	chr2	28395085	28395623	MACS_peak_1600	0.8125	0.604089	178.05
MACS_peak_1600	chr2-28395013-28395413	5.68544	0.0955583	0.970463	chr2	28395104	28395604	MACS_peak_1600	0.7725	0.618	chr2	28395085	28395623	MACS_peak_1600	0.82	0.609665	178.05
MACS_peak_1600	chr2-28395011-28395411	9.82634	0.0923888	0.970463	chr2	28395104	28395604	MACS_peak_1600	0.7675	0.614	chr2	28395085	28395623	MACS_peak_1600	0.815	0.605948	178.05
MACS_peak_1601	chr2-29619624-29620024	8.02542	-3.27789	0.0664886	chr2	29619422	29619922	MACS_peak_1601	0.745	0.596	chr2	29619579	29619764	MACS_peak_1601	0.35	0.756757	67.33
MACS_peak_1605	chr2-30506571-30506971	7.40318	-0.393228	0.890479	chr2	30506665	30507165	MACS_peak_1605	0.765	0.612	chr2	30506798	30507032	MACS_peak_1605	0.4325	0.739316	62.58
MACS_peak_1605	chr2-30506573-30506973	15.8658	-1.99645	0.194934	chr2	30506665	30507165	MACS_peak_1605	0.77	0.616	chr2	30506798	30507032	MACS_peak_1605	0.4375	0.747863	62.58
MACS_peak_1607	chr2-31737660-31738060	8.33164	3.40967	0.0534783	chr2	31737494	31737994	MACS_peak_1607	0.835	0.668	chr2	31737651	31737837	MACS_peak_1607	0.4425	0.951613	60.3
MACS_peak_1607	chr2-31737658-31738058	5.77408	-0.573164	0.829838	chr2	31737494	31737994	MACS_peak_1607	0.84	0.672	chr2	31737651	31737837	MACS_peak_1607	0.4475	0.962366	60.3
MACS_peak_1607	chr2-31737657-31738057	5.97334	-1.07888	0.560143	chr2	31737494	31737994	MACS_peak_1607	0.8425	0.674	chr2	31737651	31737837	MACS_peak_1607	0.45	0.967742	60.3
MACS_peak_1613	chr2-38976448-38976848	5449.8	-2.00045	0.0236728	chr2	38976505	38977005	MACS_peak_1613	0.8575	0.686	chr2	38976615	38976895	MACS_peak_1613	0.5825	0.832143	102.26
MACS_peak_1613	chr2-38976529-38976929	14.6819	-4.31445	0.00593398	chr2	38976505	38977005	MACS_peak_1613	1	0.8	chr2	38976615	38976895	MACS_peak_1613	0.7	1	102.26
MACS_peak_1613	chr2-38976422-38976822	24.075	-0.623982	0.802699	chr2	38976505	38977005	MACS_peak_1613	0.7925	0.634	chr2	38976615	38976895	MACS_peak_1613	0.5175	0.739286	102.26
MACS_peak_1613	chr2-38976446-38976846	183.786	-0.989997	0.618422	chr2	38976505	38977005	MACS_peak_1613	0.8525	0.682	chr2	38976615	38976895	MACS_peak_1613	0.5775	0.825	102.26
MACS_peak_1613	chr2-38976512-38976912	124.305	-2.43065	0.0994549	chr2	38976505	38977005	MACS_peak_1613	1	0.8	chr2	38976615	38976895	MACS_peak_1613	0.7	1	102.26
MACS_peak_1618	chr2-41392144-41392544	9.06609	-1.06714	0.568542	chr2	41392161	41392661	MACS_peak_1618	0.9575	0.766	chr2	41392326	41392496	MACS_peak_1618	0.425	1	76.37
MACS_peak_1618	chr2-41392141-41392541	5.68194	-2.84766	0.0994549	chr2	41392161	41392661	MACS_peak_1618	0.95	0.76	chr2	41392326	41392496	MACS_peak_1618	0.425	1	76.37
MACS_peak_1619	chr2-41905734-41906134	10.4385	2.08764	0.291887	chr2	41905576	41906076	MACS_peak_1619	0.855	0.684	chr2	41905698	41905954	MACS_peak_1619	0.55	0.859375	83.82
MACS_peak_1619	chr2-41905478-41905878	7.79147	-0.293141	0.91239	chr2	41905576	41906076	MACS_peak_1619	0.755	0.604	chr2	41905698	41905954	MACS_peak_1619	0.45	0.703125	83.82
MACS_peak_1619	chr2-41905735-41906135	8.60922	-0.615765	0.76855	chr2	41905576	41906076	MACS_peak_1619	0.8525	0.682	chr2	41905698	41905954	MACS_peak_1619	0.5475	0.855469	83.82
MACS_peak_1619	chr2-41905519-41905919	6.76746	-0.899336	0.630682	chr2	41905576	41906076	MACS_peak_1619	0.8575	0.686	chr2	41905698	41905954	MACS_peak_1619	0.5525	0.863281	83.82
MACS_peak_1619	chr2-41905479-41905879	8.46941	-0.951127	0.584715	chr2	41905576	41906076	MACS_peak_1619	0.7575	0.606	chr2	41905698	41905954	MACS_peak_1619	0.4525	0.707031	83.82
MACS_peak_1619	chr2-41905476-41905876	8.07368	-1.8558	0.332361	chr2	41905576	41906076	MACS_peak_1619	0.75	0.6	chr2	41905698	41905954	MACS_peak_1619	0.445	0.695312	83.82
MACS_peak_1619	chr2-41905514-41905914	5.68194	-2.84766	0.0994549	chr2	41905576	41906076	MACS_peak_1619	0.845	0.676	chr2	41905698	41905954	MACS_peak_1619	0.54	0.84375	83.82
MACS_peak_1621	chr2-43023239-43023639	34.1185	4.36433	0.014699	chr2	43023124	43023624	MACS_peak_1621	0.9625	0.77	chr2	43023085	43023662	MACS_peak_1621	1	0.693241	227.79
MACS_peak_1621	chr2-43023238-43023638	28.8015	3.90148	0.0142162	chr2	43023124	43023624	MACS_peak_1621	0.965	0.772	chr2	43023085	43023662	MACS_peak_1621	1	0.693241	227.79
MACS_peak_1621	chr2-43023271-43023671	12.825	3.07472	0.0994549	chr2	43023124	43023624	MACS_peak_1621	0.8825	0.706	chr2	43023085	43023662	MACS_peak_1621	0.9775	0.677643	227.79
MACS_peak_1621	chr2-43023272-43023672	34.4717	2.49717	0.0994549	chr2	43023124	43023624	MACS_peak_1621	0.88	0.704	chr2	43023085	43023662	MACS_peak_1621	0.975	0.67591	227.79
MACS_peak_1621	chr2-43023240-43023640	39.1692	1.23768	0.463945	chr2	43023124	43023624	MACS_peak_1621	0.96	0.768	chr2	43023085	43023662	MACS_peak_1621	1	0.693241	227.79
MACS_peak_1627	chr2-46399287-46399687	6.10667	2.39605	0.156722	chr2	46399374	46399874	MACS_peak_1627	0.7825	0.626	chr2	46399344	46399904	MACS_peak_1627	0.8575	0.6125	229.84
MACS_peak_1627	chr2-46399372-46399772	6.16327	1.64458	0.369213	chr2	46399374	46399874	MACS_peak_1627	0.995	0.796	chr2	46399344	46399904	MACS_peak_1627	1	0.714286	229.84
MACS_peak_1627	chr2-46399371-46399771	54.732	1.64184	0.430435	chr2	46399374	46399874	MACS_peak_1627	0.9925	0.794	chr2	46399344	46399904	MACS_peak_1627	1	0.714286	229.84
MACS_peak_1627	chr2-46399374-46399774	7.39385	1.23476	0.484461	chr2	46399374	46399874	MACS_peak_1627	1	0.8	chr2	46399344	46399904	MACS_peak_1627	1	0.714286	229.84
MACS_peak_1628	chr2-46662076-46662476	10.838	3.99606	0.0142162	chr2	46662105	46662605	MACS_peak_1628	0.9275	0.742	chr2	46662181	46662529	MACS_peak_1628	0.7375	0.847701	122.8
MACS_peak_1628	chr2-46662068-46662468	10.585	1.64222	0.307905	chr2	46662105	46662605	MACS_peak_1628	0.9075	0.726	chr2	46662181	46662529	MACS_peak_1628	0.7175	0.824713	122.8
MACS_peak_1628	chr2-46662069-46662469	11.4649	1.32184	0.460702	chr2	46662105	46662605	MACS_peak_1628	0.91	0.728	chr2	46662181	46662529	MACS_peak_1628	0.72	0.827586	122.8
MACS_peak_1628	chr2-46662066-46662466	24.7117	0.680962	0.73975	chr2	46662105	46662605	MACS_peak_1628	0.9025	0.722	chr2	46662181	46662529	MACS_peak_1628	0.7125	0.818966	122.8
MACS_peak_1628	chr2-46662070-46662470	5.6398	0.495032	0.863467	chr2	46662105	46662605	MACS_peak_1628	0.9125	0.73	chr2	46662181	46662529	MACS_peak_1628	0.7225	0.83046	122.8
MACS_peak_1628	chr2-46662067-46662467	15.1701	-0.0742134	0.970463	chr2	46662105	46662605	MACS_peak_1628	0.905	0.724	chr2	46662181	46662529	MACS_peak_1628	0.715	0.821839	122.8
MACS_peak_1629	chr2-47198047-47198447	10.2173	1.20026	0.53455	chr2	47197963	47198463	MACS_peak_1629	1	0.8	chr2	47198025	47198401	MACS_peak_1629	0.885	0.941489	97.09
MACS_peak_1629	chr2-47198048-47198448	9.90445	0.440292	0.863467	chr2	47197963	47198463	MACS_peak_1629	1	0.8	chr2	47198025	47198401	MACS_peak_1629	0.8825	0.93883	97.09
MACS_peak_1629	chr2-47198046-47198446	11.5601	0.141587	0.970463	chr2	47197963	47198463	MACS_peak_1629	1	0.8	chr2	47198025	47198401	MACS_peak_1629	0.8875	0.944149	97.09
MACS_peak_1629	chr2-47198049-47198449	11.1855	-0.0575368	0.971525	chr2	47197963	47198463	MACS_peak_1629	1	0.8	chr2	47198025	47198401	MACS_peak_1629	0.88	0.93617	97.09
MACS_peak_1629	chr2-47198050-47198450	17.5112	-0.0800857	0.970463	chr2	47197963	47198463	MACS_peak_1629	1	0.8	chr2	47198025	47198401	MACS_peak_1629	0.8775	0.933511	97.09
MACS_peak_1629	chr2-47197944-47198344	6.32045	-2.46223	0.157867	chr2	47197963	47198463	MACS_peak_1629	0.9525	0.762	chr2	47198025	47198401	MACS_peak_1629	0.7975	0.848404	97.09
MACS_peak_1630	chr2-49068202-49068602	8.87132	2.18557	0.168095	chr2	49068143	49068643	MACS_peak_1630	1	0.8	chr2	49068167	49068619	MACS_peak_1630	1	0.884956	109.54
MACS_peak_1630	chr2-49068203-49068603	7.93212	0.0936545	0.970463	chr2	49068143	49068643	MACS_peak_1630	1	0.8	chr2	49068167	49068619	MACS_peak_1630	1	0.884956	109.54
MACS_peak_1630	chr2-49068177-49068577	5.58343	-1.81737	0.310789	chr2	49068143	49068643	MACS_peak_1630	1	0.8	chr2	49068167	49068619	MACS_peak_1630	1	0.884956	109.54
MACS_peak_1635	chr2-53199710-53200110	14.3366	1.71544	0.352721	chr2	53199564	53200064	MACS_peak_1635	0.885	0.708	chr2	53199735	53199892	MACS_peak_1635	0.3925	1	66.04
MACS_peak_1635	chr2-53199486-53199886	6.66009	-1.03826	0.608288	chr2	53199564	53200064	MACS_peak_1635	0.805	0.644	chr2	53199735	53199892	MACS_peak_1635	0.3775	0.961783	66.04
MACS_peak_1636	chr2-54045825-54046225	34.5193	0.00254364	0.998908	chr2	54045775	54046275	MACS_peak_1636	1	0.8	chr2	54045901	54046148	MACS_peak_1636	0.6175	1	62.87
MACS_peak_1636	chr2-54045830-54046230	62.9194	-0.132713	0.970463	chr2	54045775	54046275	MACS_peak_1636	1	0.8	chr2	54045901	54046148	MACS_peak_1636	0.6175	1	62.87
MACS_peak_1636	chr2-54045821-54046221	90.9205	-0.197483	0.965759	chr2	54045775	54046275	MACS_peak_1636	1	0.8	chr2	54045901	54046148	MACS_peak_1636	0.6175	1	62.87
MACS_peak_1636	chr2-54045829-54046229	30.9376	-0.456061	0.874517	chr2	54045775	54046275	MACS_peak_1636	1	0.8	chr2	54045901	54046148	MACS_peak_1636	0.6175	1	62.87
MACS_peak_1636	chr2-54045832-54046232	224.045	-1.29068	0.265951	chr2	54045775	54046275	MACS_peak_1636	1	0.8	chr2	54045901	54046148	MACS_peak_1636	0.6175	1	62.87
MACS_peak_1636	chr2-54045814-54046214	260.439	-1.3307	0.237217	chr2	54045775	54046275	MACS_peak_1636	1	0.8	chr2	54045901	54046148	MACS_peak_1636	0.6175	1	62.87
MACS_peak_1636	chr2-54045816-54046216	368.578	-1.44469	0.196304	chr2	54045775	54046275	MACS_peak_1636	1	0.8	chr2	54045901	54046148	MACS_peak_1636	0.6175	1	62.87
MACS_peak_1636	chr2-54045831-54046231	228.241	-1.8325	0.0854051	chr2	54045775	54046275	MACS_peak_1636	1	0.8	chr2	54045901	54046148	MACS_peak_1636	0.6175	1	62.87
MACS_peak_1640	chr2-56274196-56274596	594.2	0.0474422	0.977656	chr2	56274124	56274624	MACS_peak_1640	1	0.8	chr2	56274258	56274490	MACS_peak_1640	0.58	1	63.36
MACS_peak_1640	chr2-56274264-56274664	37.1479	-0.752898	0.703775	chr2	56274124	56274624	MACS_peak_1640	0.9	0.72	chr2	56274258	56274490	MACS_peak_1640	0.565	0.974138	63.36
MACS_peak_1640	chr2-56274197-56274597	44.9102	-0.803054	0.622214	chr2	56274124	56274624	MACS_peak_1640	1	0.8	chr2	56274258	56274490	MACS_peak_1640	0.58	1	63.36
MACS_peak_1640	chr2-56274195-56274595	19.3082	-1.09294	0.645482	chr2	56274124	56274624	MACS_peak_1640	1	0.8	chr2	56274258	56274490	MACS_peak_1640	0.58	1	63.36
MACS_peak_1640	chr2-56274263-56274663	67.0698	-1.14125	0.583546	chr2	56274124	56274624	MACS_peak_1640	0.9025	0.722	chr2	56274258	56274490	MACS_peak_1640	0.5675	0.978448	63.36
MACS_peak_1640	chr2-56274198-56274598	253.941	-1.18494	0.326682	chr2	56274124	56274624	MACS_peak_1640	1	0.8	chr2	56274258	56274490	MACS_peak_1640	0.58	1	63.36
MACS_peak_1640	chr2-56274265-56274665	171.494	-2.01026	0.0994549	chr2	56274124	56274624	MACS_peak_1640	0.8975	0.718	chr2	56274258	56274490	MACS_peak_1640	0.5625	0.969828	63.36
MACS_peak_1640	chr2-56274262-56274662	67.1403	-2.52654	0.102415	chr2	56274124	56274624	MACS_peak_1640	0.905	0.724	chr2	56274258	56274490	MACS_peak_1640	0.57	0.982759	63.36
MACS_peak_1641	chr2-56351051-56351451	5.68544	0.0955583	0.970463	chr2	56350934	56351434	MACS_peak_1641	0.9575	0.766	chr2	56351097	56351270	MACS_peak_1641	0.4325	1	61.34
MACS_peak_1641	chr2-56351004-56351404	16.1961	-0.838269	0.637011	chr2	56350934	56351434	MACS_peak_1641	1	0.8	chr2	56351097	56351270	MACS_peak_1641	0.4325	1	61.34
MACS_peak_1641	chr2-56351002-56351402	145.382	-1.24754	0.300091	chr2	56350934	56351434	MACS_peak_1641	1	0.8	chr2	56351097	56351270	MACS_peak_1641	0.4325	1	61.34
MACS_peak_1641	chr2-56351055-56351455	8.29594	-2.4928	0.104357	chr2	56350934	56351434	MACS_peak_1641	0.9475	0.758	chr2	56351097	56351270	MACS_peak_1641	0.4325	1	61.34
MACS_peak_1643	chr2-57797496-57797896	5.68194	-2.84766	0.0994549	chr2	57797355	57797855	MACS_peak_1643	0.8975	0.718	chr2	57797473	57797736	MACS_peak_1643	0.6	0.912548	61.62
MACS_peak_165	chr1-170127173-170127573	147.285	-0.0251119	0.987783	chr1	170127255	170127755	MACS_peak_165	0.795	0.636	chr1	170127375	170127635	MACS_peak_165	0.495	0.761538	70.72
MACS_peak_165	chr1-170127235-170127635	140.068	-0.451879	0.874938	chr1	170127255	170127755	MACS_peak_165	0.95	0.76	chr1	170127375	170127635	MACS_peak_165	0.65	1	70.72
MACS_peak_165	chr1-170127171-170127571	170.274	-0.799228	0.539414	chr1	170127255	170127755	MACS_peak_165	0.79	0.632	chr1	170127375	170127635	MACS_peak_165	0.49	0.753846	70.72
MACS_peak_165	chr1-170127234-170127634	17.1066	-0.811105	0.715921	chr1	170127255	170127755	MACS_peak_165	0.9475	0.758	chr1	170127375	170127635	MACS_peak_165	0.6475	0.996154	70.72
MACS_peak_165	chr1-170127233-170127633	118.019	-0.84122	0.590894	chr1	170127255	170127755	MACS_peak_165	0.945	0.756	chr1	170127375	170127635	MACS_peak_165	0.645	0.992308	70.72
MACS_peak_165	chr1-170127172-170127572	62.992	-1.02705	0.428058	chr1	170127255	170127755	MACS_peak_165	0.7925	0.634	chr1	170127375	170127635	MACS_peak_165	0.4925	0.757692	70.72
MACS_peak_1652	chr2-62186974-62187374	30.2191	4.16748	0.0116018							chr2	62187132	62187375	MACS_peak_1652	0.605	0.995885	79.03
MACS_peak_1652	chr2-62186973-62187373	24.2217	4.0658	0.0120646							chr2	62187132	62187375	MACS_peak_1652	0.6025	0.99177	79.03
MACS_peak_1652	chr2-62187195-62187595	10.8594	3.73405	0.0490482							chr2	62187132	62187375	MACS_peak_1652	0.45	0.740741	79.03
MACS_peak_1652	chr2-62186971-62187371	37.5229	2.82531	0.0534783							chr2	62187132	62187375	MACS_peak_1652	0.5975	0.983539	79.03
MACS_peak_1652	chr2-62186972-62187372	23.9997	2.35735	0.108381							chr2	62187132	62187375	MACS_peak_1652	0.6	0.987654	79.03
MACS_peak_1665	chr2-75510010-75510410	260.671	-0.336943	0.90773	chr2	75510102	75510602	MACS_peak_1665	0.77	0.616	chr2	75510211	75510492	MACS_peak_1665	0.4975	0.708185	67.56
MACS_peak_1665	chr2-75510012-75510412	680.791	-0.72185	0.588168	chr2	75510102	75510602	MACS_peak_1665	0.775	0.62	chr2	75510211	75510492	MACS_peak_1665	0.5025	0.715302	67.56
MACS_peak_167	chr1-170362435-170362835	39.5192	0.723456	0.759101	chr1	170362238	170362738	MACS_peak_167	0.7575	0.606	chr1	170362353	170362622	MACS_peak_167	0.4675	0.695167	64.69
MACS_peak_167	chr1-170362118-170362518	16.0657	0.300694	0.94115	chr1	170362238	170362738	MACS_peak_167	0.7	0.56	chr1	170362353	170362622	MACS_peak_167	0.4125	0.613383	64.69
MACS_peak_167	chr1-170362434-170362834	23.0039	0.000822572	0.999751	chr1	170362238	170362738	MACS_peak_167	0.76	0.608	chr1	170362353	170362622	MACS_peak_167	0.47	0.698885	64.69
MACS_peak_167	chr1-170362433-170362833	73.6718	-0.574772	0.732526	chr1	170362238	170362738	MACS_peak_167	0.7625	0.61	chr1	170362353	170362622	MACS_peak_167	0.4725	0.702602	64.69
MACS_peak_167	chr1-170362116-170362516	13.7013	-0.828572	0.647094	chr1	170362238	170362738	MACS_peak_167	0.695	0.556	chr1	170362353	170362622	MACS_peak_167	0.4075	0.605948	64.69
MACS_peak_1670	chr2-81153136-81153536	13.8784	3.03009	0.0534783							chr2	81153229	81153463	MACS_peak_1670	0.585	1	52.29
MACS_peak_1670	chr2-81153149-81153549	8.88883	2.44384	0.125793							chr2	81153229	81153463	MACS_peak_1670	0.585	1	52.29
MACS_peak_1670	chr2-81153137-81153537	7.88852	1.73504	0.303574							chr2	81153229	81153463	MACS_peak_1670	0.585	1	52.29
MACS_peak_1670	chr2-81153135-81153535	19.3418	1.12217	0.501523							chr2	81153229	81153463	MACS_peak_1670	0.585	1	52.29
MACS_peak_1670	chr2-81153123-81153523	5.54137	1.01065	0.630508							chr2	81153229	81153463	MACS_peak_1670	0.585	1	52.29
MACS_peak_1670	chr2-81153124-81153524	5.72614	0.283239	0.933058							chr2	81153229	81153463	MACS_peak_1670	0.585	1	52.29
MACS_peak_1671	chr2-82648735-82649135	8.18829	-0.592671	0.830441	chr2	82648708	82649208	MACS_peak_1671	1	0.8	chr2	82648769	82649147	MACS_peak_1671	0.915	0.968254	86.31
MACS_peak_1671	chr2-82648733-82649133	27.4001	-0.745362	0.743438	chr2	82648708	82649208	MACS_peak_1671	1	0.8	chr2	82648769	82649147	MACS_peak_1671	0.91	0.962963	86.31
MACS_peak_1672	chr2-83216309-83216709	19.7655	3.22699	0.0605993	chr2	83216283	83216783	MACS_peak_1672	1	0.8	chr2	83216416	83216650	MACS_peak_1672	0.585	1	65.79
MACS_peak_1672	chr2-83216202-83216602	12.825	3.07472	0.0994549	chr2	83216283	83216783	MACS_peak_1672	0.7975	0.638	chr2	83216416	83216650	MACS_peak_1672	0.465	0.794872	65.79
MACS_peak_1672	chr2-83216201-83216601	58.3067	1.92395	0.25485	chr2	83216283	83216783	MACS_peak_1672	0.795	0.636	chr2	83216416	83216650	MACS_peak_1672	0.4625	0.790598	65.79
MACS_peak_1672	chr2-83216308-83216708	8.38512	0.941556	0.611848	chr2	83216283	83216783	MACS_peak_1672	1	0.8	chr2	83216416	83216650	MACS_peak_1672	0.585	1	65.79
MACS_peak_1672	chr2-83216310-83216710	15	0.78056	0.756886	chr2	83216283	83216783	MACS_peak_1672	1	0.8	chr2	83216416	83216650	MACS_peak_1672	0.585	1	65.79
MACS_peak_1672	chr2-83216203-83216603	10.5049	0.0896203	0.970463	chr2	83216283	83216783	MACS_peak_1672	0.8	0.64	chr2	83216416	83216650	MACS_peak_1672	0.4675	0.799145	65.79
MACS_peak_1672	chr2-83216306-83216706	19.6331	-0.395353	0.854469	chr2	83216283	83216783	MACS_peak_1672	1	0.8	chr2	83216416	83216650	MACS_peak_1672	0.585	1	65.79
MACS_peak_1672	chr2-83216307-83216707	7.07969	-0.395536	0.866031	chr2	83216283	83216783	MACS_peak_1672	1	0.8	chr2	83216416	83216650	MACS_peak_1672	0.585	1	65.79
MACS_peak_1674	chr2-84126967-84127367	7.59111	1.89917	0.303553	chr2	84126957	84127457	MACS_peak_1674	1	0.8	chr2	84127109	84127305	MACS_peak_1674	0.49	1	61.07
MACS_peak_1674	chr2-84127064-84127464	53.4221	-0.769803	0.752768	chr2	84126957	84127457	MACS_peak_1674	0.9825	0.786	chr2	84127109	84127305	MACS_peak_1674	0.49	1	61.07
MACS_peak_1674	chr2-84127003-84127403	6.51956	-0.881474	0.65279	chr2	84126957	84127457	MACS_peak_1674	1	0.8	chr2	84127109	84127305	MACS_peak_1674	0.49	1	61.07
MACS_peak_1674	chr2-84127062-84127462	86.7826	-1.47058	0.23348	chr2	84126957	84127457	MACS_peak_1674	0.9875	0.79	chr2	84127109	84127305	MACS_peak_1674	0.49	1	61.07
MACS_peak_1674	chr2-84127063-84127463	23.8626	-2.44061	0.111781	chr2	84126957	84127457	MACS_peak_1674	0.985	0.788	chr2	84127109	84127305	MACS_peak_1674	0.49	1	61.07
MACS_peak_1676	chr2-86653245-86653645	405.258	2.8318	0.0848023	chr2	86653275	86653775	MACS_peak_1676	0.925	0.74	chr2	86653334	86653716	MACS_peak_1676	0.7775	0.814136	125.84
MACS_peak_1676	chr2-86653172-86653572	9.51314	1.13944	0.552744	chr2	86653275	86653775	MACS_peak_1676	0.7425	0.594	chr2	86653334	86653716	MACS_peak_1676	0.595	0.623037	125.84
MACS_peak_1676	chr2-86653247-86653647	1209.84	0.938452	0.451187	chr2	86653275	86653775	MACS_peak_1676	0.93	0.744	chr2	86653334	86653716	MACS_peak_1676	0.7825	0.819372	125.84
MACS_peak_1676	chr2-86653250-86653650	5087.97	0.425143	0.728664	chr2	86653275	86653775	MACS_peak_1676	0.9375	0.75	chr2	86653334	86653716	MACS_peak_1676	0.79	0.827225	125.84
MACS_peak_1676	chr2-86653248-86653648	11539.5	-0.854912	0.316616	chr2	86653275	86653775	MACS_peak_1676	0.9325	0.746	chr2	86653334	86653716	MACS_peak_1676	0.785	0.82199	125.84
MACS_peak_1676	chr2-86653170-86653570	12.5056	-1.07978	0.588312	chr2	86653275	86653775	MACS_peak_1676	0.7375	0.59	chr2	86653334	86653716	MACS_peak_1676	0.59	0.617801	125.84
MACS_peak_1676	chr2-86653439-86653839	228.079	-1.17368	0.550389	chr2	86653275	86653775	MACS_peak_1676	0.84	0.672	chr2	86653334	86653716	MACS_peak_1676	0.6925	0.725131	125.84
MACS_peak_1678	chr2-88837946-88838346	26.7894	3.78123	0.0153938	chr2	88837767	88838267	MACS_peak_1678	0.8025	0.642	chr2	88837784	88838249	MACS_peak_1678	0.7575	0.651613	262.75
MACS_peak_1678	chr2-88837945-88838345	18.8019	1.93157	0.212295	chr2	88837767	88838267	MACS_peak_1678	0.805	0.644	chr2	88837784	88838249	MACS_peak_1678	0.76	0.653763	262.75
MACS_peak_1678	chr2-88837688-88838088	5.81528	1.59546	0.444703	chr2	88837767	88838267	MACS_peak_1678	0.8025	0.642	chr2	88837784	88838249	MACS_peak_1678	0.76	0.653763	262.75
MACS_peak_1678	chr2-88837944-88838344	13.9047	0.795576	0.674536	chr2	88837767	88838267	MACS_peak_1678	0.8075	0.646	chr2	88837784	88838249	MACS_peak_1678	0.7625	0.655914	262.75
MACS_peak_1678	chr2-88837943-88838343	15.1108	0.314877	0.906405	chr2	88837767	88838267	MACS_peak_1678	0.81	0.648	chr2	88837784	88838249	MACS_peak_1678	0.765	0.658065	262.75
MACS_peak_1679	chr2-92281111-92281511	10.1921	-3.54852	0.0534783							chr2	92281241	92281566	MACS_peak_1679	0.675	0.830769	55.53
MACS_peak_1682	chr2-99656914-99657314	1616.53	8.165	8.96119e-16							chr2	99657128	99657407	MACS_peak_1682	0.465	0.666667	90.87
MACS_peak_1682	chr2-99657114-99657514	161.125	5.71666	2.23816e-06							chr2	99657128	99657407	MACS_peak_1682	0.6975	1	90.87
MACS_peak_1682	chr2-99657138-99657538	1262.44	3.45194	0.000194407							chr2	99657128	99657407	MACS_peak_1682	0.6725	0.964158	90.87
MACS_peak_1682	chr2-99657186-99657586	39.931	3.42665	0.0204352							chr2	99657128	99657407	MACS_peak_1682	0.5525	0.792115	90.87
MACS_peak_1682	chr2-99657137-99657537	555.195	3.36483	0.000875103							chr2	99657128	99657407	MACS_peak_1682	0.675	0.967742	90.87
MACS_peak_1682	chr2-99657136-99657536	332.923	3.34599	0.0097877							chr2	99657128	99657407	MACS_peak_1682	0.6775	0.971326	90.87
MACS_peak_1682	chr2-99656901-99657301	2014.07	2.92355	0.0808664							chr2	99657128	99657407	MACS_peak_1682	0.4325	0.620072	90.87
MACS_peak_1682	chr2-99657135-99657535	92.7841	2.71219	0.0844305							chr2	99657128	99657407	MACS_peak_1682	0.68	0.97491	90.87
MACS_peak_1682	chr2-99656941-99657341	146.09	2.19401	0.35133							chr2	99657128	99657407	MACS_peak_1682	0.5325	0.763441	90.87
MACS_peak_1682	chr2-99657134-99657534	51.5527	2.16403	0.205631							chr2	99657128	99657407	MACS_peak_1682	0.6825	0.978495	90.87
MACS_peak_1682	chr2-99657188-99657588	40.6904	1.18593	0.475109							chr2	99657128	99657407	MACS_peak_1682	0.5475	0.784946	90.87
MACS_peak_1682	chr2-99657187-99657587	9.97779	1.16587	0.527939							chr2	99657128	99657407	MACS_peak_1682	0.55	0.78853	90.87
MACS_peak_1682	chr2-99657223-99657623	6.2005	0.121142	0.970463							chr2	99657128	99657407	MACS_peak_1682	0.46	0.659498	90.87
MACS_peak_1682	chr2-99657224-99657624	11.0114	-3.00318	0.0885329							chr2	99657128	99657407	MACS_peak_1682	0.4575	0.655914	90.87
MACS_peak_1683	chr2-99657252-99657652	235.136	7.05975	3.75189e-09							chr2	99657453	99657711	MACS_peak_1683	0.4975	0.771318	58.9
MACS_peak_1683	chr2-99657253-99657653	588.166	5.43324	2.03563e-05							chr2	99657453	99657711	MACS_peak_1683	0.5	0.775194	58.9
MACS_peak_1683	chr2-99657349-99657749	141.261	4.58244	0.000882282							chr2	99657453	99657711	MACS_peak_1683	0.645	1	58.9
MACS_peak_1683	chr2-99657255-99657655	936.09	4.40697	3.19756e-05							chr2	99657453	99657711	MACS_peak_1683	0.505	0.782946	58.9
MACS_peak_1683	chr2-99657254-99657654	876.951	4.04828	8.89666e-05							chr2	99657453	99657711	MACS_peak_1683	0.5025	0.77907	58.9
MACS_peak_1683	chr2-99657350-99657750	321.857	4.00436	0.0052996							chr2	99657453	99657711	MACS_peak_1683	0.645	1	58.9
MACS_peak_1683	chr2-99657352-99657752	264.82	2.97076	0.0236728							chr2	99657453	99657711	MACS_peak_1683	0.645	1	58.9
MACS_peak_1683	chr2-99657484-99657884	8.33164	3.40967	0.0534783							chr2	99657453	99657711	MACS_peak_1683	0.5675	0.879845	58.9
MACS_peak_1683	chr2-99657351-99657751	172.686	2.67126	0.0534783							chr2	99657453	99657711	MACS_peak_1683	0.645	1	58.9
MACS_peak_1683	chr2-99657340-99657740	4726.56	1.69374	0.488597							chr2	99657453	99657711	MACS_peak_1683	0.645	1	58.9
MACS_peak_1685	chr2-99740198-99740598	36.5496	-4.88654	0.0077175	chr2	99740084	99740584	MACS_peak_1685	0.965	0.772	chr2	99740187	99740480	MACS_peak_1685	0.705	0.962457	67.65
MACS_peak_1685	chr2-99740197-99740597	8.66633	0.22707	0.965738	chr2	99740084	99740584	MACS_peak_1685	0.9675	0.774	chr2	99740187	99740480	MACS_peak_1685	0.7075	0.96587	67.65
MACS_peak_1685	chr2-99740195-99740595	9.06447	-0.208874	0.959186	chr2	99740084	99740584	MACS_peak_1685	0.9725	0.778	chr2	99740187	99740480	MACS_peak_1685	0.7125	0.972696	67.65
MACS_peak_1685	chr2-99740194-99740594	9.98016	-0.822128	0.646332	chr2	99740084	99740584	MACS_peak_1685	0.975	0.78	chr2	99740187	99740480	MACS_peak_1685	0.715	0.976109	67.65
MACS_peak_1686	chr2-100413156-100413556	9.21541	-0.241112	0.956942	chr2	100412974	100413474	MACS_peak_1686	0.795	0.636	chr2	100413105	100413343	MACS_peak_1686	0.4675	0.785714	65.18
MACS_peak_1686	chr2-100412853-100413253	13.4078	-1.16986	0.543484	chr2	100412974	100413474	MACS_peak_1686	0.6975	0.558	chr2	100413105	100413343	MACS_peak_1686	0.37	0.621849	65.18
MACS_peak_1686	chr2-100412851-100413251	8.07557	-1.17975	0.498862	chr2	100412974	100413474	MACS_peak_1686	0.6925	0.554	chr2	100413105	100413343	MACS_peak_1686	0.365	0.613445	65.18
MACS_peak_1686	chr2-100413155-100413555	6.93511	-1.26145	0.550242	chr2	100412974	100413474	MACS_peak_1686	0.7975	0.638	chr2	100413105	100413343	MACS_peak_1686	0.47	0.789916	65.18
MACS_peak_1686	chr2-100413157-100413557	11.05	-1.28598	0.559504	chr2	100412974	100413474	MACS_peak_1686	0.7925	0.634	chr2	100413105	100413343	MACS_peak_1686	0.465	0.781513	65.18
MACS_peak_1686	chr2-100413158-100413558	13.2961	-1.84155	0.206534	chr2	100412974	100413474	MACS_peak_1686	0.79	0.632	chr2	100413105	100413343	MACS_peak_1686	0.4625	0.777311	65.18
MACS_peak_1687	chr2-100737493-100737893	19.1921	-4.22447	0.0236728	chr2	100737411	100737911	MACS_peak_1687	1	0.8	chr2	100737546	100737776	MACS_peak_1687	0.575	1	60.89
MACS_peak_1687	chr2-100737488-100737888	6.80703	-1.94795	0.326682	chr2	100737411	100737911	MACS_peak_1687	1	0.8	chr2	100737546	100737776	MACS_peak_1687	0.575	1	60.89
MACS_peak_1687	chr2-100737508-100737908	5.68194	-2.84766	0.0994549	chr2	100737411	100737911	MACS_peak_1687	1	0.8	chr2	100737546	100737776	MACS_peak_1687	0.575	1	60.89
MACS_peak_1688	chr2-102320642-102321042	1429.41	8.78711	3.2321e-19	chr2	102320478	102320978	MACS_peak_1688	0.84	0.672	chr2	102320444	102321011	MACS_peak_1688	0.9225	0.650794	700.87
MACS_peak_1688	chr2-102320599-102320999	18.7665	3.60352	0.0534783	chr2	102320478	102320978	MACS_peak_1688	0.9475	0.758	chr2	102320444	102321011	MACS_peak_1688	1	0.705467	700.87
MACS_peak_1688	chr2-102320602-102321002	39.7692	2.42504	0.196842	chr2	102320478	102320978	MACS_peak_1688	0.94	0.752	chr2	102320444	102321011	MACS_peak_1688	1	0.705467	700.87
MACS_peak_1688	chr2-102320598-102320998	92.9105	1.66985	0.254839	chr2	102320478	102320978	MACS_peak_1688	0.95	0.76	chr2	102320444	102321011	MACS_peak_1688	1	0.705467	700.87
MACS_peak_1688	chr2-102320600-102321000	26.9406	1.62462	0.332929	chr2	102320478	102320978	MACS_peak_1688	0.945	0.756	chr2	102320444	102321011	MACS_peak_1688	1	0.705467	700.87
MACS_peak_1688	chr2-102320528-102320928	187.833	-0.351713	0.889486	chr2	102320478	102320978	MACS_peak_1688	1	0.8	chr2	102320444	102321011	MACS_peak_1688	1	0.705467	700.87
MACS_peak_1688	chr2-102320596-102320996	15.0249	-0.496934	0.857173	chr2	102320478	102320978	MACS_peak_1688	0.955	0.764	chr2	102320444	102321011	MACS_peak_1688	1	0.705467	700.87
MACS_peak_169	chr1-170964899-170965299	6.53294	-0.854298	0.67419	chr1	170964816	170965316	MACS_peak_169	1	0.8	chr1	170964908	170965223	MACS_peak_169	0.7875	1	61.85
MACS_peak_169	chr1-170964900-170965300	5.68194	-2.84766	0.0994549	chr1	170964816	170965316	MACS_peak_169	1	0.8	chr1	170964908	170965223	MACS_peak_169	0.7875	1	61.85
MACS_peak_1691	chr2-104506679-104507079	15.7666	-0.383111	0.86915	chr2	104506724	104507224	MACS_peak_1691	0.8875	0.71	chr2	104506858	104507089	MACS_peak_1691	0.5525	0.95671	66.25
MACS_peak_1691	chr2-104506698-104507098	7.35846	-0.80924	0.69295	chr2	104506724	104507224	MACS_peak_1691	0.935	0.748	chr2	104506858	104507089	MACS_peak_1691	0.5775	1	66.25
MACS_peak_1691	chr2-104506934-104507334	15.157	-1.26325	0.471902	chr2	104506724	104507224	MACS_peak_1691	0.725	0.58	chr2	104506858	104507089	MACS_peak_1691	0.3875	0.670996	66.25
MACS_peak_1691	chr2-104506700-104507100	10.2367	-1.27009	0.447226	chr2	104506724	104507224	MACS_peak_1691	0.94	0.752	chr2	104506858	104507089	MACS_peak_1691	0.5775	1	66.25
MACS_peak_1691	chr2-104506864-104507264	7.30077	-1.65133	0.372052	chr2	104506724	104507224	MACS_peak_1691	0.9	0.72	chr2	104506858	104507089	MACS_peak_1691	0.5625	0.974026	66.25
MACS_peak_1698	chr2-113931410-113931810	8.42106	-1.18349	0.511837	chr2	113931247	113931747	MACS_peak_1698	0.8425	0.674	chr2	113931359	113931634	MACS_peak_1698	0.56	0.814545	66.26
MACS_peak_170	chr1-171526365-171526765	7748.23	-1.91422	0.0202681	chr1	171526346	171526846	MACS_peak_170	1	0.8	chr1	171526433	171526758	MACS_peak_170	0.8125	1	75.98
MACS_peak_170	chr1-171526368-171526768	145.186	-0.567199	0.727135	chr1	171526346	171526846	MACS_peak_170	1	0.8	chr1	171526433	171526758	MACS_peak_170	0.8125	1	75.98
MACS_peak_170	chr1-171526363-171526763	5.67512	-1.74497	0.290823	chr1	171526346	171526846	MACS_peak_170	1	0.8	chr1	171526433	171526758	MACS_peak_170	0.8125	1	75.98
MACS_peak_170	chr1-171526384-171526784	6.36952	-1.85664	0.248661	chr1	171526346	171526846	MACS_peak_170	1	0.8	chr1	171526433	171526758	MACS_peak_170	0.8125	1	75.98
MACS_peak_170	chr1-171526258-171526658	10.1921	-3.54852	0.0534783	chr1	171526346	171526846	MACS_peak_170	0.78	0.624	chr1	171526433	171526758	MACS_peak_170	0.5625	0.692308	75.98
MACS_peak_1713	chr2-123717373-123717773	9.60404	0.934282	0.598332	chr2	123717375	123717875	MACS_peak_1713	0.995	0.796	chr2	123717538	123717711	MACS_peak_1713	0.4325	1	65.09
MACS_peak_1713	chr2-123717374-123717774	6.3506	-0.185254	0.970463	chr2	123717375	123717875	MACS_peak_1713	0.9975	0.798	chr2	123717538	123717711	MACS_peak_1713	0.4325	1	65.09
MACS_peak_1713	chr2-123717569-123717969	18.6507	-0.984186	0.655587	chr2	123717375	123717875	MACS_peak_1713	0.765	0.612	chr2	123717538	123717711	MACS_peak_1713	0.355	0.820809	65.09
MACS_peak_1713	chr2-123717371-123717771	13.1383	-1.04688	0.54336	chr2	123717375	123717875	MACS_peak_1713	0.99	0.792	chr2	123717538	123717711	MACS_peak_1713	0.4325	1	65.09
MACS_peak_1730	chr2-137133229-137133629	102.454	5.89718	4.06372e-06	chr2	137133035	137133535	MACS_peak_1730	0.765	0.612	chr2	137133043	137133526	MACS_peak_1730	0.7425	0.614907	260.58
MACS_peak_1730	chr2-137132977-137133377	27.8668	4.71895	0.0104514	chr2	137133035	137133535	MACS_peak_1730	0.855	0.684	chr2	137133043	137133526	MACS_peak_1730	0.835	0.691511	260.58
MACS_peak_1730	chr2-137133211-137133611	16.6829	3.66733	0.0254645	chr2	137133035	137133535	MACS_peak_1730	0.81	0.648	chr2	137133043	137133526	MACS_peak_1730	0.7875	0.652174	260.58
MACS_peak_1730	chr2-137132992-137133392	1219.77	2.91203	0.00448201	chr2	137133035	137133535	MACS_peak_1730	0.8925	0.714	chr2	137133043	137133526	MACS_peak_1730	0.8725	0.722567	260.58
MACS_peak_1730	chr2-137133094-137133494	24.6636	2.66687	0.0725935	chr2	137133035	137133535	MACS_peak_1730	1	0.8	chr2	137133043	137133526	MACS_peak_1730	1	0.828157	260.58
MACS_peak_1730	chr2-137132990-137133390	939.826	2.37503	0.154817	chr2	137133035	137133535	MACS_peak_1730	0.8875	0.71	chr2	137133043	137133526	MACS_peak_1730	0.8675	0.718427	260.58
MACS_peak_1730	chr2-137132991-137133391	404.918	2.20133	0.066023	chr2	137133035	137133535	MACS_peak_1730	0.89	0.712	chr2	137133043	137133526	MACS_peak_1730	0.87	0.720497	260.58
MACS_peak_1730	chr2-137133231-137133631	169.551	2.01889	0.147687	chr2	137133035	137133535	MACS_peak_1730	0.76	0.608	chr2	137133043	137133526	MACS_peak_1730	0.7375	0.610766	260.58
MACS_peak_1730	chr2-137133096-137133496	71.7893	1.98166	0.111781	chr2	137133035	137133535	MACS_peak_1730	1	0.8	chr2	137133043	137133526	MACS_peak_1730	1	0.828157	260.58
MACS_peak_1730	chr2-137133210-137133610	9.36179	1.31306	0.468653	chr2	137133035	137133535	MACS_peak_1730	0.8125	0.65	chr2	137133043	137133526	MACS_peak_1730	0.79	0.654244	260.58
MACS_peak_1730	chr2-137133185-137133585	14.1745	1.24891	0.551369	chr2	137133035	137133535	MACS_peak_1730	0.875	0.7	chr2	137133043	137133526	MACS_peak_1730	0.8525	0.706004	260.58
MACS_peak_1730	chr2-137133212-137133612	14.2103	1.13185	0.50522	chr2	137133035	137133535	MACS_peak_1730	0.8075	0.646	chr2	137133043	137133526	MACS_peak_1730	0.785	0.650104	260.58
MACS_peak_1730	chr2-137133095-137133495	19.1083	0.580587	0.830441	chr2	137133035	137133535	MACS_peak_1730	1	0.8	chr2	137133043	137133526	MACS_peak_1730	1	0.828157	260.58
MACS_peak_1731	chr2-138165878-138166278	9.64375	0.0707327	0.971035	chr2	138165946	138166446	MACS_peak_1731	0.83	0.664	chr2	138166081	138166311	MACS_peak_1731	0.4925	0.856522	63.19
MACS_peak_1731	chr2-138165877-138166277	13.4025	-1.39966	0.3897	chr2	138165946	138166446	MACS_peak_1731	0.8275	0.662	chr2	138166081	138166311	MACS_peak_1731	0.49	0.852174	63.19
MACS_peak_1737	chr2-147454643-147455043	129.057	5.77016	2.52659e-06	chr2	147454675	147455175	MACS_peak_1737	0.92	0.736	chr2	147454745	147455104	MACS_peak_1737	0.745	0.830084	119.25
MACS_peak_1737	chr2-147454644-147455044	86.7381	3.767	0.0024703	chr2	147454675	147455175	MACS_peak_1737	0.9225	0.738	chr2	147454745	147455104	MACS_peak_1737	0.7475	0.832869	119.25
MACS_peak_1737	chr2-147454646-147455046	56	2.72792	0.0419365	chr2	147454675	147455175	MACS_peak_1737	0.9275	0.742	chr2	147454745	147455104	MACS_peak_1737	0.7525	0.83844	119.25
MACS_peak_1737	chr2-147454645-147455045	23.6088	2.86958	0.0534783	chr2	147454675	147455175	MACS_peak_1737	0.925	0.74	chr2	147454745	147455104	MACS_peak_1737	0.75	0.835655	119.25
MACS_peak_1741	chr2-149629136-149629536	3168.89	0.481893	0.678311	chr2	149628997	149629497	MACS_peak_1741	0.9025	0.722	chr2	149629153	149629340	MACS_peak_1741	0.4675	1	79.02
MACS_peak_1744	chr2-150623482-150623882	9.89369	-0.110051	0.970463	chr2	150623445	150623945	MACS_peak_1744	1	0.8	chr2	150623577	150623812	MACS_peak_1744	0.5875	1	65.16
MACS_peak_1744	chr2-150623481-150623881	11.5085	-0.236726	0.969192	chr2	150623445	150623945	MACS_peak_1744	1	0.8	chr2	150623577	150623812	MACS_peak_1744	0.5875	1	65.16
MACS_peak_1744	chr2-150623480-150623880	10.857	-0.56119	0.794931	chr2	150623445	150623945	MACS_peak_1744	1	0.8	chr2	150623577	150623812	MACS_peak_1744	0.5875	1	65.16
MACS_peak_1744	chr2-150623362-150623762	6.49766	-0.580663	0.80976	chr2	150623445	150623945	MACS_peak_1744	0.7925	0.634	chr2	150623577	150623812	MACS_peak_1744	0.4625	0.787234	65.16
MACS_peak_1744	chr2-150623360-150623760	7.18011	-1.05282	0.562027	chr2	150623445	150623945	MACS_peak_1744	0.7875	0.63	chr2	150623577	150623812	MACS_peak_1744	0.4575	0.778723	65.16
MACS_peak_1744	chr2-150623488-150623888	11.6676	-1.77716	0.319709	chr2	150623445	150623945	MACS_peak_1744	1	0.8	chr2	150623577	150623812	MACS_peak_1744	0.5875	1	65.16
MACS_peak_1744	chr2-150623452-150623852	11.9465	-1.83096	0.267056	chr2	150623445	150623945	MACS_peak_1744	1	0.8	chr2	150623577	150623812	MACS_peak_1744	0.5875	1	65.16
MACS_peak_1744	chr2-150623361-150623761	5.68369	-1.99798	0.304129	chr2	150623445	150623945	MACS_peak_1744	0.79	0.632	chr2	150623577	150623812	MACS_peak_1744	0.46	0.782979	65.16
MACS_peak_1744	chr2-150623451-150623851	10.2614	-3.40931	0.0534783	chr2	150623445	150623945	MACS_peak_1744	1	0.8	chr2	150623577	150623812	MACS_peak_1744	0.5875	1	65.16
MACS_peak_1746	chr2-151150096-151150496	89.5573	5.54507	6.84782e-05	chr2	151150204	151150704	MACS_peak_1746	0.73	0.584	chr2	151150275	151150633	MACS_peak_1746	0.5525	0.617318	71.2
MACS_peak_1746	chr2-151150097-151150497	118.134	4.13932	0.00970776	chr2	151150204	151150704	MACS_peak_1746	0.7325	0.586	chr2	151150275	151150633	MACS_peak_1746	0.555	0.620112	71.2
MACS_peak_1746	chr2-151150098-151150498	21.2418	2.34163	0.201957	chr2	151150204	151150704	MACS_peak_1746	0.735	0.588	chr2	151150275	151150633	MACS_peak_1746	0.5575	0.622905	71.2
MACS_peak_1746	chr2-151150162-151150562	11.0008	1.94928	0.29227	chr2	151150204	151150704	MACS_peak_1746	0.895	0.716	chr2	151150275	151150633	MACS_peak_1746	0.7175	0.801676	71.2
MACS_peak_1746	chr2-151150099-151150499	57.9992	1.75801	0.259703	chr2	151150204	151150704	MACS_peak_1746	0.7375	0.59	chr2	151150275	151150633	MACS_peak_1746	0.56	0.625698	71.2
MACS_peak_1746	chr2-151150161-151150561	13.9829	1.20253	0.529906	chr2	151150204	151150704	MACS_peak_1746	0.8925	0.714	chr2	151150275	151150633	MACS_peak_1746	0.715	0.798883	71.2
MACS_peak_1746	chr2-151150160-151150560	15.9554	1.12939	0.543585	chr2	151150204	151150704	MACS_peak_1746	0.89	0.712	chr2	151150275	151150633	MACS_peak_1746	0.7125	0.796089	71.2
MACS_peak_1747	chr2-151276989-151277389	6.10635	-2.43263	0.130428	chr2	151276944	151277444	MACS_peak_1747	1	0.8	chr2	151277112	151277276	MACS_peak_1747	0.41	1	65.73
MACS_peak_1747	chr2-151276990-151277390	10.1921	-3.54852	0.0534783	chr2	151276944	151277444	MACS_peak_1747	1	0.8	chr2	151277112	151277276	MACS_peak_1747	0.41	1	65.73
MACS_peak_1747	chr2-151276888-151277288	10.1921	-3.54852	0.0534783	chr2	151276944	151277444	MACS_peak_1747	0.86	0.688	chr2	151277112	151277276	MACS_peak_1747	0.41	1	65.73
MACS_peak_1750	chr2-151768639-151769039	10.4385	2.08764	0.291887	chr2	151768507	151769007	MACS_peak_1750	0.92	0.736	chr2	151768665	151768848	MACS_peak_1750	0.4575	1	62.62
MACS_peak_1750	chr2-151768638-151769038	10.6486	-0.316784	0.900293	chr2	151768507	151769007	MACS_peak_1750	0.9225	0.738	chr2	151768665	151768848	MACS_peak_1750	0.4575	1	62.62
MACS_peak_1750	chr2-151768636-151769036	15.6587	-0.403501	0.857173	chr2	151768507	151769007	MACS_peak_1750	0.9275	0.742	chr2	151768665	151768848	MACS_peak_1750	0.4575	1	62.62
MACS_peak_1751	chr2-152261636-152262036	8.03138	1.14954	0.566679	chr2	152261596	152262096	MACS_peak_1751	1	0.8	chr2	152261687	152262004	MACS_peak_1751	0.7925	1	61.61
MACS_peak_1751	chr2-152261614-152262014	7.85378	-0.673325	0.757608	chr2	152261596	152262096	MACS_peak_1751	1	0.8	chr2	152261687	152262004	MACS_peak_1751	0.7925	1	61.61
MACS_peak_1751	chr2-152261638-152262038	7.15649	-1.45138	0.395923	chr2	152261596	152262096	MACS_peak_1751	1	0.8	chr2	152261687	152262004	MACS_peak_1751	0.7925	1	61.61
MACS_peak_1751	chr2-152261616-152262016	16.3497	-1.8789	0.222262	chr2	152261596	152262096	MACS_peak_1751	1	0.8	chr2	152261687	152262004	MACS_peak_1751	0.7925	1	61.61
MACS_peak_1751	chr2-152261615-152262015	35.3997	-2.31225	0.202915	chr2	152261596	152262096	MACS_peak_1751	1	0.8	chr2	152261687	152262004	MACS_peak_1751	0.7925	1	61.61
MACS_peak_1751	chr2-152261503-152261903	6.76245	-2.60728	0.133504	chr2	152261596	152262096	MACS_peak_1751	0.7675	0.614	chr2	152261687	152262004	MACS_peak_1751	0.54	0.681388	61.61
MACS_peak_1755	chr2-156679334-156679734	10.603	0.997154	0.552326	chr2	156679231	156679731	MACS_peak_1755	0.9925	0.794	chr2	156679401	156679560	MACS_peak_1755	0.3975	1	77.82
MACS_peak_1755	chr2-156679397-156679797	20.5407	-0.2276	0.969192	chr2	156679231	156679731	MACS_peak_1755	0.835	0.668	chr2	156679401	156679560	MACS_peak_1755	0.3975	1	77.82
MACS_peak_1755	chr2-156679452-156679852	5.78325	-0.693013	0.731754	chr2	156679231	156679731	MACS_peak_1755	0.6975	0.558	chr2	156679401	156679560	MACS_peak_1755	0.27	0.679245	77.82
MACS_peak_1759	chr2-161209131-161209531	64.3705	5.44774	4.66182e-05	chr2	161208940	161209440	MACS_peak_1759	0.7725	0.618	chr2	161208944	161209435	MACS_peak_1759	0.76	0.619145	125.64
MACS_peak_1759	chr2-161208944-161209344	6.02577	3.06077	0.0854051	chr2	161208940	161209440	MACS_peak_1759	1	0.8	chr2	161208944	161209435	MACS_peak_1759	1	0.814664	125.64
MACS_peak_1759	chr2-161208934-161209334	27.3277	2.71716	0.0994549	chr2	161208940	161209440	MACS_peak_1759	0.985	0.788	chr2	161208944	161209435	MACS_peak_1759	0.975	0.794297	125.64
MACS_peak_1759	chr2-161209130-161209530	20.6379	2.66939	0.0994549	chr2	161208940	161209440	MACS_peak_1759	0.775	0.62	chr2	161208944	161209435	MACS_peak_1759	0.7625	0.621181	125.64
MACS_peak_1759	chr2-161209129-161209529	14.7375	1.97396	0.230314	chr2	161208940	161209440	MACS_peak_1759	0.7775	0.622	chr2	161208944	161209435	MACS_peak_1759	0.765	0.623218	125.64
MACS_peak_1759	chr2-161208932-161209332	25.2897	1.73933	0.275488	chr2	161208940	161209440	MACS_peak_1759	0.98	0.784	chr2	161208944	161209435	MACS_peak_1759	0.97	0.790224	125.64
MACS_peak_1759	chr2-161208935-161209335	108.419	1.65752	0.378623	chr2	161208940	161209440	MACS_peak_1759	0.9875	0.79	chr2	161208944	161209435	MACS_peak_1759	0.9775	0.796334	125.64
MACS_peak_1759	chr2-161208945-161209345	10.3086	1.63897	0.388293	chr2	161208940	161209440	MACS_peak_1759	1	0.8	chr2	161208944	161209435	MACS_peak_1759	1	0.814664	125.64
MACS_peak_1759	chr2-161208933-161209333	14.3813	1.5023	0.373923	chr2	161208940	161209440	MACS_peak_1759	0.9825	0.786	chr2	161208944	161209435	MACS_peak_1759	0.9725	0.792261	125.64
MACS_peak_1759	chr2-161209128-161209528	22.2892	1.07192	0.557384	chr2	161208940	161209440	MACS_peak_1759	0.78	0.624	chr2	161208944	161209435	MACS_peak_1759	0.7675	0.625255	125.64
MACS_peak_1759	chr2-161208946-161209346	46.3463	0.310976	0.90148	chr2	161208940	161209440	MACS_peak_1759	1	0.8	chr2	161208944	161209435	MACS_peak_1759	1	0.814664	125.64
MACS_peak_1765	chr2-164882915-164883315	11.9014	3.80841	0.0451282	chr2	164882744	164883244	MACS_peak_1765	0.8225	0.658	chr2	164882911	164883076	MACS_peak_1765	0.4025	0.975758	60.84
MACS_peak_1765	chr2-164882883-164883283	6.02577	3.06077	0.0854051	chr2	164882744	164883244	MACS_peak_1765	0.9025	0.722	chr2	164882911	164883076	MACS_peak_1765	0.4125	1	60.84
MACS_peak_1765	chr2-164882882-164883282	7.37508	0.925076	0.65844	chr2	164882744	164883244	MACS_peak_1765	0.905	0.724	chr2	164882911	164883076	MACS_peak_1765	0.4125	1	60.84
MACS_peak_1765	chr2-164882780-164883180	15.3493	0.84861	0.739426	chr2	164882744	164883244	MACS_peak_1765	1	0.8	chr2	164882911	164883076	MACS_peak_1765	0.4125	1	60.84
MACS_peak_1765	chr2-164882916-164883316	12.1391	0.380216	0.868518	chr2	164882744	164883244	MACS_peak_1765	0.82	0.656	chr2	164882911	164883076	MACS_peak_1765	0.4	0.969697	60.84
MACS_peak_1765	chr2-164882913-164883313	9.47571	0.226195	0.951609	chr2	164882744	164883244	MACS_peak_1765	0.8275	0.662	chr2	164882911	164883076	MACS_peak_1765	0.4075	0.987879	60.84
MACS_peak_1765	chr2-164882884-164883284	6.05354	0.0379396	0.981828	chr2	164882744	164883244	MACS_peak_1765	0.9	0.72	chr2	164882911	164883076	MACS_peak_1765	0.4125	1	60.84
MACS_peak_1765	chr2-164882783-164883183	15.5969	-0.512145	0.803034	chr2	164882744	164883244	MACS_peak_1765	1	0.8	chr2	164882911	164883076	MACS_peak_1765	0.4125	1	60.84
MACS_peak_1765	chr2-164882918-164883318	20.9266	-1.03959	0.585125	chr2	164882744	164883244	MACS_peak_1765	0.815	0.652	chr2	164882911	164883076	MACS_peak_1765	0.395	0.957576	60.84
MACS_peak_1765	chr2-164882912-164883312	19.4291	-1.16323	0.506128	chr2	164882744	164883244	MACS_peak_1765	0.83	0.664	chr2	164882911	164883076	MACS_peak_1765	0.41	0.993939	60.84
MACS_peak_1765	chr2-164882911-164883311	21.4007	-1.33283	0.40255	chr2	164882744	164883244	MACS_peak_1765	0.8325	0.666	chr2	164882911	164883076	MACS_peak_1765	0.4125	1	60.84
MACS_peak_1765	chr2-164882917-164883317	21.4911	-2.28391	0.135167	chr2	164882744	164883244	MACS_peak_1765	0.8175	0.654	chr2	164882911	164883076	MACS_peak_1765	0.3975	0.963636	60.84
MACS_peak_1777	chr2-171178021-171178421	63.6606	2.90849	0.0534783	chr2	171177903	171178403	MACS_peak_1777	0.955	0.764	chr2	171177944	171178362	MACS_peak_1777	0.8525	0.815789	125.69
MACS_peak_1777	chr2-171178036-171178436	256.661	2.70955	0.0854051	chr2	171177903	171178403	MACS_peak_1777	0.9175	0.734	chr2	171177944	171178362	MACS_peak_1777	0.815	0.779904	125.69
MACS_peak_1777	chr2-171178038-171178438	182.15	2.55851	0.0548848	chr2	171177903	171178403	MACS_peak_1777	0.9125	0.73	chr2	171177944	171178362	MACS_peak_1777	0.81	0.77512	125.69
MACS_peak_1777	chr2-171178037-171178437	185.138	2.35839	0.0743405	chr2	171177903	171178403	MACS_peak_1777	0.915	0.732	chr2	171177944	171178362	MACS_peak_1777	0.8125	0.777512	125.69
MACS_peak_1777	chr2-171178035-171178435	32.6569	2.06497	0.192775	chr2	171177903	171178403	MACS_peak_1777	0.92	0.736	chr2	171177944	171178362	MACS_peak_1777	0.8175	0.782297	125.69
MACS_peak_1777	chr2-171178065-171178465	6300.28	1.54912	0.0994549	chr2	171177903	171178403	MACS_peak_1777	0.845	0.676	chr2	171177944	171178362	MACS_peak_1777	0.7425	0.710526	125.69
MACS_peak_1778	chr2-171422519-171422919	15.9364	-0.149767	0.970463	chr2	171422515	171423015	MACS_peak_1778	1	0.8	chr2	171422653	171422876	MACS_peak_1778	0.5575	1	61.54
MACS_peak_1778	chr2-171422517-171422917	21.5173	-0.770248	0.667895	chr2	171422515	171423015	MACS_peak_1778	1	0.8	chr2	171422653	171422876	MACS_peak_1778	0.5575	1	61.54
MACS_peak_1778	chr2-171422541-171422941	10.3992	-0.779384	0.689758	chr2	171422515	171423015	MACS_peak_1778	1	0.8	chr2	171422653	171422876	MACS_peak_1778	0.5575	1	61.54
MACS_peak_1778	chr2-171422518-171422918	21.435	-1.6276	0.326682	chr2	171422515	171423015	MACS_peak_1778	1	0.8	chr2	171422653	171422876	MACS_peak_1778	0.5575	1	61.54
MACS_peak_1780	chr2-172193684-172194084	6.94527	-1.27852	0.542041	chr2	172193600	172194100	MACS_peak_1780	1	0.8	chr2	172193669	172194030	MACS_peak_1780	0.865	0.958449	62.37
MACS_peak_1784	chr2-173043535-173043935	23.4746	-4.93247	0.000918273	chr2	173043411	173043911	MACS_peak_1784	0.94	0.752	chr2	173043538	173043783	MACS_peak_1784	0.6125	1	69.03
MACS_peak_1784	chr2-173043397-173043797	17.2592	2.83628	0.0994549	chr2	173043411	173043911	MACS_peak_1784	0.965	0.772	chr2	173043538	173043783	MACS_peak_1784	0.6125	1	69.03
MACS_peak_1784	chr2-173043549-173043949	8.1918	2.14747	0.26888	chr2	173043411	173043911	MACS_peak_1784	0.905	0.724	chr2	173043538	173043783	MACS_peak_1784	0.585	0.955102	69.03
MACS_peak_1784	chr2-173043550-173043950	8.29133	0.817613	0.713654	chr2	173043411	173043911	MACS_peak_1784	0.9025	0.722	chr2	173043538	173043783	MACS_peak_1784	0.5825	0.95102	69.03
MACS_peak_1784	chr2-173043536-173043936	10.5496	0.342912	0.927909	chr2	173043411	173043911	MACS_peak_1784	0.9375	0.75	chr2	173043538	173043783	MACS_peak_1784	0.6125	1	69.03
MACS_peak_1784	chr2-173043395-173043795	11.9643	0.334917	0.893364	chr2	173043411	173043911	MACS_peak_1784	0.96	0.768	chr2	173043538	173043783	MACS_peak_1784	0.6125	1	69.03
MACS_peak_1784	chr2-173043447-173043847	16.7306	-0.44974	0.830441	chr2	173043411	173043911	MACS_peak_1784	1	0.8	chr2	173043538	173043783	MACS_peak_1784	0.6125	1	69.03
MACS_peak_1784	chr2-173043548-173043948	10.6715	-0.744347	0.684351	chr2	173043411	173043911	MACS_peak_1784	0.9075	0.726	chr2	173043538	173043783	MACS_peak_1784	0.5875	0.959184	69.03
MACS_peak_1784	chr2-173043534-173043934	56.0514	-2.01758	0.171768	chr2	173043411	173043911	MACS_peak_1784	0.9425	0.754	chr2	173043538	173043783	MACS_peak_1784	0.6125	1	69.03
MACS_peak_1786	chr2-173294604-173295004	428.361	-0.246021	0.914148	chr2	173294446	173294946	MACS_peak_1786	0.855	0.684	chr2	173294591	173294800	MACS_peak_1786	0.49	0.937799	69.67
MACS_peak_1786	chr2-173294414-173294814	12.5536	-0.50166	0.855692	chr2	173294446	173294946	MACS_peak_1786	0.92	0.736	chr2	173294591	173294800	MACS_peak_1786	0.5225	1	69.67
MACS_peak_1795	chr2-178034693-178035093	62.8184	5.29291	0.000280957	chr2	178034740	178035290	MACS_peak_1795	0.8825	0.641818	chr2	178034702	178035327	MACS_peak_1795	0.9775	0.6256	370.78
MACS_peak_1795	chr2-178034679-178035079	40.1993	3.69366	0.0493584	chr2	178034740	178035290	MACS_peak_1795	0.8475	0.616364	chr2	178034702	178035327	MACS_peak_1795	0.9425	0.6032	370.78
MACS_peak_1795	chr2-178034889-178035289	7.26822	3.49693	0.0362369	chr2	178034740	178035290	MACS_peak_1795	1	0.727273	chr2	178034702	178035327	MACS_peak_1795	1	0.64	370.78
MACS_peak_1795	chr2-178034886-178035286	18.5016	3.30322	0.0397047	chr2	178034740	178035290	MACS_peak_1795	1	0.727273	chr2	178034702	178035327	MACS_peak_1795	1	0.64	370.78
MACS_peak_1795	chr2-178034685-178035085	8.33164	3.40967	0.0534783	chr2	178034740	178035290	MACS_peak_1795	0.8625	0.627273	chr2	178034702	178035327	MACS_peak_1795	0.9575	0.6128	370.78
MACS_peak_1795	chr2-178034677-178035077	18.1128	1.91003	0.175178	chr2	178034740	178035290	MACS_peak_1795	0.8425	0.612727	chr2	178034702	178035327	MACS_peak_1795	0.9375	0.6	370.78
MACS_peak_1795	chr2-178034885-178035285	86.931	1.70467	0.227433	chr2	178034740	178035290	MACS_peak_1795	1	0.727273	chr2	178034702	178035327	MACS_peak_1795	1	0.64	370.78
MACS_peak_1799	chr2-179886826-179887226	7.50541	-1.41995	0.391453	chr2	179886706	179887206	MACS_peak_1799	0.95	0.76	chr2	179886774	179887138	MACS_peak_1799	0.78	0.857143	66.62
MACS_peak_1809	chr2-186013969-186014369	6.25314	2.23929	0.206419	chr2	186014024	186014524	MACS_peak_1809	0.8625	0.69	chr2	186014199	186014348	MACS_peak_1809	0.3725	1	66.04
MACS_peak_1809	chr2-186014247-186014647	15.0789	0.524067	0.851952	chr2	186014024	186014524	MACS_peak_1809	0.6925	0.554	chr2	186014199	186014348	MACS_peak_1809	0.2525	0.677852	66.04
MACS_peak_1809	chr2-186014249-186014649	22.8424	-0.753575	0.658696	chr2	186014024	186014524	MACS_peak_1809	0.6875	0.55	chr2	186014199	186014348	MACS_peak_1809	0.2475	0.66443	66.04
MACS_peak_1809	chr2-186014102-186014502	17.8015	-0.805523	0.697218	chr2	186014024	186014524	MACS_peak_1809	1	0.8	chr2	186014199	186014348	MACS_peak_1809	0.3725	1	66.04
MACS_peak_1809	chr2-186013971-186014371	10.4391	-1.36065	0.432434	chr2	186014024	186014524	MACS_peak_1809	0.8675	0.694	chr2	186014199	186014348	MACS_peak_1809	0.3725	1	66.04
MACS_peak_1809	chr2-186013970-186014370	26.1918	-1.96448	0.34446	chr2	186014024	186014524	MACS_peak_1809	0.865	0.692	chr2	186014199	186014348	MACS_peak_1809	0.3725	1	66.04
MACS_peak_1815	chr2-189873405-189873805	26.8906	1.69552	0.429324	chr2	189873503	189874003	MACS_peak_1815	0.755	0.604	chr2	189873614	189873891	MACS_peak_1815	0.4775	0.689531	59.85
MACS_peak_1815	chr2-189873407-189873807	31.8851	1.38294	0.404246	chr2	189873503	189874003	MACS_peak_1815	0.76	0.608	chr2	189873614	189873891	MACS_peak_1815	0.4825	0.696751	59.85
MACS_peak_1815	chr2-189873659-189874059	7.8844	-0.606869	0.798642	chr2	189873503	189874003	MACS_peak_1815	0.86	0.688	chr2	189873614	189873891	MACS_peak_1815	0.58	0.837545	59.85
MACS_peak_1815	chr2-189873660-189874060	23.7244	-1.26421	0.559764	chr2	189873503	189874003	MACS_peak_1815	0.8575	0.686	chr2	189873614	189873891	MACS_peak_1815	0.5775	0.833935	59.85
MACS_peak_1815	chr2-189873658-189874058	23.8711	-1.43022	0.438347	chr2	189873503	189874003	MACS_peak_1815	0.8625	0.69	chr2	189873614	189873891	MACS_peak_1815	0.5825	0.841155	59.85
MACS_peak_1815	chr2-189873657-189874057	41.4305	-1.89036	0.139608	chr2	189873503	189874003	MACS_peak_1815	0.865	0.692	chr2	189873614	189873891	MACS_peak_1815	0.585	0.844765	59.85
MACS_peak_1818	chr2-192079284-192079684	108.227	1.25277	0.388673	chr2	192079383	192079883	MACS_peak_1818	0.7525	0.602	chr2	192079533	192079732	MACS_peak_1818	0.3775	0.758794	64.03
MACS_peak_1818	chr2-192079455-192079855	22.8627	0.367481	0.867028	chr2	192079383	192079883	MACS_peak_1818	1	0.8	chr2	192079533	192079732	MACS_peak_1818	0.4975	1	64.03
MACS_peak_1818	chr2-192079478-192079878	45.322	0.0929378	0.970463	chr2	192079383	192079883	MACS_peak_1818	1	0.8	chr2	192079533	192079732	MACS_peak_1818	0.4975	1	64.03
MACS_peak_1818	chr2-192079283-192079683	28.7401	-0.18314	0.963221	chr2	192079383	192079883	MACS_peak_1818	0.75	0.6	chr2	192079533	192079732	MACS_peak_1818	0.375	0.753769	64.03
MACS_peak_1818	chr2-192079479-192079879	33.8212	-0.22575	0.970463	chr2	192079383	192079883	MACS_peak_1818	1	0.8	chr2	192079533	192079732	MACS_peak_1818	0.4975	1	64.03
MACS_peak_1818	chr2-192079477-192079877	20.9974	-0.290483	0.908826	chr2	192079383	192079883	MACS_peak_1818	1	0.8	chr2	192079533	192079732	MACS_peak_1818	0.4975	1	64.03
MACS_peak_1818	chr2-192079282-192079682	158.176	-0.360033	0.854023	chr2	192079383	192079883	MACS_peak_1818	0.7475	0.598	chr2	192079533	192079732	MACS_peak_1818	0.3725	0.748744	64.03
MACS_peak_1818	chr2-192079476-192079876	37.6935	-1.06047	0.469121	chr2	192079383	192079883	MACS_peak_1818	1	0.8	chr2	192079533	192079732	MACS_peak_1818	0.4975	1	64.03
MACS_peak_1818	chr2-192079453-192079853	17.175	-1.60793	0.293895	chr2	192079383	192079883	MACS_peak_1818	1	0.8	chr2	192079533	192079732	MACS_peak_1818	0.4975	1	64.03
MACS_peak_1818	chr2-192079454-192079854	21.6816	-1.8098	0.330669	chr2	192079383	192079883	MACS_peak_1818	1	0.8	chr2	192079533	192079732	MACS_peak_1818	0.4975	1	64.03
MACS_peak_1822	chr2-193409434-193409834	32.3916	2.97973	0.0734435	chr2	193409390	193409890	MACS_peak_1822	1	0.8	chr2	193409456	193409823	MACS_peak_1822	0.9175	1	86.92
MACS_peak_1822	chr2-193409427-193409827	16.6971	1.85765	0.248395	chr2	193409390	193409890	MACS_peak_1822	1	0.8	chr2	193409456	193409823	MACS_peak_1822	0.9175	1	86.92
MACS_peak_1822	chr2-193409433-193409833	21.3452	1.65683	0.431339	chr2	193409390	193409890	MACS_peak_1822	1	0.8	chr2	193409456	193409823	MACS_peak_1822	0.9175	1	86.92
MACS_peak_1822	chr2-193409432-193409832	57.6529	1.60503	0.340781	chr2	193409390	193409890	MACS_peak_1822	1	0.8	chr2	193409456	193409823	MACS_peak_1822	0.9175	1	86.92
MACS_peak_1822	chr2-193409429-193409829	24.3628	1.3465	0.439501	chr2	193409390	193409890	MACS_peak_1822	1	0.8	chr2	193409456	193409823	MACS_peak_1822	0.9175	1	86.92
MACS_peak_1822	chr2-193409428-193409828	47.1207	0.356038	0.90642	chr2	193409390	193409890	MACS_peak_1822	1	0.8	chr2	193409456	193409823	MACS_peak_1822	0.9175	1	86.92
MACS_peak_1822	chr2-193409311-193409711	8.6108	-0.0415775	0.981132	chr2	193409390	193409890	MACS_peak_1822	0.8025	0.642	chr2	193409456	193409823	MACS_peak_1822	0.6375	0.694823	86.92
MACS_peak_1822	chr2-193409309-193409709	8.47081	-0.109195	0.970463	chr2	193409390	193409890	MACS_peak_1822	0.7975	0.638	chr2	193409456	193409823	MACS_peak_1822	0.6325	0.689373	86.92
MACS_peak_1822	chr2-193409359-193409759	7.57716	-1.04962	0.597488	chr2	193409390	193409890	MACS_peak_1822	0.9225	0.738	chr2	193409456	193409823	MACS_peak_1822	0.7575	0.825613	86.92
MACS_peak_1823	chr2-193591415-193591815	27.6325	-0.942986	0.585655	chr2	193591550	193592050	MACS_peak_1823	0.6625	0.53	chr2	193591722	193591877	MACS_peak_1823	0.2325	0.6	62.92
MACS_peak_1823	chr2-193591416-193591816	78.7686	-1.11212	0.38869	chr2	193591550	193592050	MACS_peak_1823	0.665	0.532	chr2	193591722	193591877	MACS_peak_1823	0.235	0.606452	62.92
MACS_peak_1823	chr2-193591466-193591866	7.38689	-1.28925	0.459207	chr2	193591550	193592050	MACS_peak_1823	0.79	0.632	chr2	193591722	193591877	MACS_peak_1823	0.36	0.929032	62.92
MACS_peak_1825	chr2-194018244-194018644	49.6748	3.10785	0.0534783	chr2	194018182	194018682	MACS_peak_1825	1	0.8	chr2	194018317	194018547	MACS_peak_1825	0.575	1	65.42
MACS_peak_1825	chr2-194018246-194018646	49.4546	2.4269	0.0994549	chr2	194018182	194018682	MACS_peak_1825	1	0.8	chr2	194018317	194018547	MACS_peak_1825	0.575	1	65.42
MACS_peak_1829	chr2-195980704-195981104	8.38387	-0.540452	0.800648	chr2	195980592	195981092	MACS_peak_1829	0.97	0.776	chr2	195980760	195980924	MACS_peak_1829	0.41	1	66.04
MACS_peak_1829	chr2-195980736-195981136	8.72913	-0.619906	0.803998	chr2	195980592	195981092	MACS_peak_1829	0.89	0.712	chr2	195980760	195980924	MACS_peak_1829	0.41	1	66.04
MACS_peak_1829	chr2-195980703-195981103	6.68927	-1.6616	0.334064	chr2	195980592	195981092	MACS_peak_1829	0.9725	0.778	chr2	195980760	195980924	MACS_peak_1829	0.41	1	66.04
MACS_peak_1829	chr2-195980702-195981102	12.8871	-1.8189	0.251061	chr2	195980592	195981092	MACS_peak_1829	0.975	0.78	chr2	195980760	195980924	MACS_peak_1829	0.41	1	66.04
MACS_peak_1831	chr2-197577630-197578030	11.85	0.863312	0.639767	chr2	197577697	197578197	MACS_peak_1831	0.8325	0.666	chr2	197577848	197578045	MACS_peak_1831	0.455	0.923858	60.9
MACS_peak_1831	chr2-197577642-197578042	16.9329	0.824007	0.632372	chr2	197577697	197578197	MACS_peak_1831	0.8625	0.69	chr2	197577848	197578045	MACS_peak_1831	0.485	0.984772	60.9
MACS_peak_1831	chr2-197577768-197578168	6.7365	-0.919071	0.616227	chr2	197577697	197578197	MACS_peak_1831	1	0.8	chr2	197577848	197578045	MACS_peak_1831	0.4925	1	60.9
MACS_peak_1838	chr2-200798658-200799058	6.0829	-1.30881	0.492626	chr2	200798782	200799282	MACS_peak_1838	0.69	0.552	chr2	200798902	200799161	MACS_peak_1838	0.39	0.602317	77.79
MACS_peak_1838	chr2-200798966-200799366	5.68194	-2.84766	0.0994549	chr2	200798782	200799282	MACS_peak_1838	0.79	0.632	chr2	200798902	200799161	MACS_peak_1838	0.4875	0.752896	77.79
MACS_peak_184	chr1-181068738-181069138	595.096	2.20757	0.0565721	chr1	181068666	181069166	MACS_peak_184	1	0.8	chr1	181068703	181069129	MACS_peak_184	0.9775	0.91784	81.24
MACS_peak_184	chr1-181068762-181069162	12.0923	2.01107	0.216393	chr1	181068666	181069166	MACS_peak_184	1	0.8	chr1	181068703	181069129	MACS_peak_184	0.9175	0.861502	81.24
MACS_peak_184	chr1-181068761-181069161	40.6303	1.88466	0.291887	chr1	181068666	181069166	MACS_peak_184	1	0.8	chr1	181068703	181069129	MACS_peak_184	0.92	0.86385	81.24
MACS_peak_184	chr1-181068764-181069164	17.6187	-0.031239	0.985827	chr1	181068666	181069166	MACS_peak_184	1	0.8	chr1	181068703	181069129	MACS_peak_184	0.9125	0.856808	81.24
MACS_peak_184	chr1-181068763-181069163	11.2791	-0.492759	0.830441	chr1	181068666	181069166	MACS_peak_184	1	0.8	chr1	181068703	181069129	MACS_peak_184	0.915	0.859155	81.24
MACS_peak_184	chr1-181068846-181069246	20.9759	-2.81638	0.0772558	chr1	181068666	181069166	MACS_peak_184	0.8	0.64	chr1	181068703	181069129	MACS_peak_184	0.7075	0.664319	81.24
MACS_peak_1845	chr2-205628675-205629075	815.151	4.64555	0.00196227	chr2	205628541	205629041	MACS_peak_1845	0.915	0.732	chr2	205628709	205628873	MACS_peak_1845	0.41	1	66.04
MACS_peak_1845	chr2-205628686-205629086	23.0332	4.52239	0.0142162	chr2	205628541	205629041	MACS_peak_1845	0.8875	0.71	chr2	205628709	205628873	MACS_peak_1845	0.41	1	66.04
MACS_peak_1845	chr2-205628673-205629073	538.181	4.03946	0.000635553	chr2	205628541	205629041	MACS_peak_1845	0.92	0.736	chr2	205628709	205628873	MACS_peak_1845	0.41	1	66.04
MACS_peak_1845	chr2-205628676-205629076	77.5071	3.88771	0.0100618	chr2	205628541	205629041	MACS_peak_1845	0.9125	0.73	chr2	205628709	205628873	MACS_peak_1845	0.41	1	66.04
MACS_peak_1845	chr2-205628682-205629082	123.182	3.77247	0.00730059	chr2	205628541	205629041	MACS_peak_1845	0.8975	0.718	chr2	205628709	205628873	MACS_peak_1845	0.41	1	66.04
MACS_peak_1845	chr2-205628674-205629074	123.122	2.86327	0.0236728	chr2	205628541	205629041	MACS_peak_1845	0.9175	0.734	chr2	205628709	205628873	MACS_peak_1845	0.41	1	66.04
MACS_peak_1845	chr2-205628700-205629100	12.2234	1.9617	0.217803	chr2	205628541	205629041	MACS_peak_1845	0.8525	0.682	chr2	205628709	205628873	MACS_peak_1845	0.41	1	66.04
MACS_peak_1845	chr2-205628493-205628893	8.6083	0.848386	0.669767	chr2	205628541	205629041	MACS_peak_1845	0.88	0.704	chr2	205628709	205628873	MACS_peak_1845	0.41	1	66.04
MACS_peak_1845	chr2-205628702-205629102	12.4722	0.674006	0.746926	chr2	205628541	205629041	MACS_peak_1845	0.8475	0.678	chr2	205628709	205628873	MACS_peak_1845	0.41	1	66.04
MACS_peak_1845	chr2-205628699-205629099	7.93212	0.0936545	0.970463	chr2	205628541	205629041	MACS_peak_1845	0.855	0.684	chr2	205628709	205628873	MACS_peak_1845	0.41	1	66.04
MACS_peak_1845	chr2-205628736-205629136	61.0051	-0.101957	0.970463	chr2	205628541	205629041	MACS_peak_1845	0.7625	0.61	chr2	205628709	205628873	MACS_peak_1845	0.3425	0.835366	66.04
MACS_peak_1847	chr2-207159250-207159650	7.16776	-0.0525775	0.978142	chr2	207159359	207159859	MACS_peak_1847	0.7275	0.582	chr2	207159487	207159730	MACS_peak_1847	0.4075	0.670782	64.44
MACS_peak_1847	chr2-207159384-207159784	7.21198	-0.794569	0.671194	chr2	207159359	207159859	MACS_peak_1847	1	0.8	chr2	207159487	207159730	MACS_peak_1847	0.6075	1	64.44
MACS_peak_1847	chr2-207159248-207159648	9.74455	-1.82822	0.251866	chr2	207159359	207159859	MACS_peak_1847	0.7225	0.578	chr2	207159487	207159730	MACS_peak_1847	0.4025	0.662551	64.44
MACS_peak_1848	chr2-207370112-207370512	19.4564	-0.516568	0.793127	chr2	207370188	207370688	MACS_peak_1848	0.81	0.648	chr2	207370335	207370540	MACS_peak_1848	0.4425	0.863415	79.12
MACS_peak_1848	chr2-207370113-207370513	6.81099	-0.815806	0.685405	chr2	207370188	207370688	MACS_peak_1848	0.8125	0.65	chr2	207370335	207370540	MACS_peak_1848	0.445	0.868293	79.12
MACS_peak_1853	chr2-210793987-210794387	10.052	3.38027	0.0534783	chr2	210794069	210794569	MACS_peak_1853	0.795	0.636	chr2	210794166	210794471	MACS_peak_1853	0.5525	0.72459	85.96
MACS_peak_1853	chr2-210794251-210794651	7.43111	-0.251628	0.937665	chr2	210794069	210794569	MACS_peak_1853	0.795	0.636	chr2	210794166	210794471	MACS_peak_1853	0.55	0.721311	85.96
MACS_peak_1853	chr2-210793985-210794385	6.62338	-0.441709	0.860135	chr2	210794069	210794569	MACS_peak_1853	0.79	0.632	chr2	210794166	210794471	MACS_peak_1853	0.5475	0.718033	85.96
MACS_peak_1853	chr2-210794249-210794649	12.6816	-0.548887	0.85658	chr2	210794069	210794569	MACS_peak_1853	0.8	0.64	chr2	210794166	210794471	MACS_peak_1853	0.555	0.727869	85.96
MACS_peak_1853	chr2-210794148-210794548	8.2183	-0.724285	0.751971	chr2	210794069	210794569	MACS_peak_1853	1	0.8	chr2	210794166	210794471	MACS_peak_1853	0.7625	1	85.96
MACS_peak_1853	chr2-210794234-210794634	8.07827	-1.1181	0.538697	chr2	210794069	210794569	MACS_peak_1853	0.8375	0.67	chr2	210794166	210794471	MACS_peak_1853	0.5925	0.777049	85.96
MACS_peak_1853	chr2-210794149-210794549	9.68102	-1.4626	0.364578	chr2	210794069	210794569	MACS_peak_1853	1	0.8	chr2	210794166	210794471	MACS_peak_1853	0.7625	1	85.96
MACS_peak_1854	chr2-211347384-211347784	10.6832	0.911064	0.64708	chr2	211347411	211347911	MACS_peak_1854	0.9325	0.746	chr2	211347518	211347803	MACS_peak_1854	0.665	0.933333	67.56
MACS_peak_1854	chr2-211347381-211347781	21.5888	0.3711	0.876013	chr2	211347411	211347911	MACS_peak_1854	0.925	0.74	chr2	211347518	211347803	MACS_peak_1854	0.6575	0.922807	67.56
MACS_peak_1854	chr2-211347379-211347779	38.9388	0.36489	0.866067	chr2	211347411	211347911	MACS_peak_1854	0.92	0.736	chr2	211347518	211347803	MACS_peak_1854	0.6525	0.915789	67.56
MACS_peak_1854	chr2-211347383-211347783	31.7205	0.217804	0.942891	chr2	211347411	211347911	MACS_peak_1854	0.93	0.744	chr2	211347518	211347803	MACS_peak_1854	0.6625	0.929825	67.56
MACS_peak_1854	chr2-211347388-211347788	14.8968	0.0902722	0.970463	chr2	211347411	211347911	MACS_peak_1854	0.9425	0.754	chr2	211347518	211347803	MACS_peak_1854	0.675	0.947368	67.56
MACS_peak_1854	chr2-211347385-211347785	89.4416	-0.00635393	0.996318	chr2	211347411	211347911	MACS_peak_1854	0.935	0.748	chr2	211347518	211347803	MACS_peak_1854	0.6675	0.936842	67.56
MACS_peak_1854	chr2-211347387-211347787	234.455	-0.0469075	0.972409	chr2	211347411	211347911	MACS_peak_1854	0.94	0.752	chr2	211347518	211347803	MACS_peak_1854	0.6725	0.94386	67.56
MACS_peak_1854	chr2-211347583-211347983	130.511	-0.175552	0.970463	chr2	211347411	211347911	MACS_peak_1854	0.82	0.656	chr2	211347518	211347803	MACS_peak_1854	0.55	0.77193	67.56
MACS_peak_1854	chr2-211347529-211347929	19.4608	-0.483841	0.862869	chr2	211347411	211347911	MACS_peak_1854	0.955	0.764	chr2	211347518	211347803	MACS_peak_1854	0.685	0.961404	67.56
MACS_peak_1854	chr2-211347585-211347985	142.514	-0.611958	0.682288	chr2	211347411	211347911	MACS_peak_1854	0.815	0.652	chr2	211347518	211347803	MACS_peak_1854	0.545	0.764912	67.56
MACS_peak_1854	chr2-211347530-211347930	37.0227	-0.787001	0.731929	chr2	211347411	211347911	MACS_peak_1854	0.9525	0.762	chr2	211347518	211347803	MACS_peak_1854	0.6825	0.957895	67.56
MACS_peak_1854	chr2-211347531-211347931	56.7796	-0.846411	0.585233	chr2	211347411	211347911	MACS_peak_1854	0.95	0.76	chr2	211347518	211347803	MACS_peak_1854	0.68	0.954386	67.56
MACS_peak_1854	chr2-211347386-211347786	14.0332	-0.986121	0.659791	chr2	211347411	211347911	MACS_peak_1854	0.9375	0.75	chr2	211347518	211347803	MACS_peak_1854	0.67	0.940351	67.56
MACS_peak_1854	chr2-211347528-211347928	10.3051	-1.17464	0.60493	chr2	211347411	211347911	MACS_peak_1854	0.9575	0.766	chr2	211347518	211347803	MACS_peak_1854	0.6875	0.964912	67.56
MACS_peak_1859	chr2-215227379-215227779	9.58482	3.77455	0.0276784	chr2	215227340	215227840	MACS_peak_1859	1	0.8	chr2	215227460	215227720	MACS_peak_1859	0.65	1	85.93
MACS_peak_1859	chr2-215227453-215227853	12.3761	3.51802	0.0483244	chr2	215227340	215227840	MACS_peak_1859	0.9675	0.774	chr2	215227460	215227720	MACS_peak_1859	0.65	1	85.93
MACS_peak_1859	chr2-215227357-215227757	7.26822	3.49693	0.0362369	chr2	215227340	215227840	MACS_peak_1859	1	0.8	chr2	215227460	215227720	MACS_peak_1859	0.65	1	85.93
MACS_peak_1859	chr2-215227355-215227755	36.0178	-4.25934	0.00400274	chr2	215227340	215227840	MACS_peak_1859	1	0.8	chr2	215227460	215227720	MACS_peak_1859	0.65	1	85.93
MACS_peak_1859	chr2-215227533-215227933	8.33164	3.40967	0.0534783	chr2	215227340	215227840	MACS_peak_1859	0.7675	0.614	chr2	215227460	215227720	MACS_peak_1859	0.4675	0.719231	85.93
MACS_peak_1859	chr2-215227532-215227932	12.825	3.07472	0.0994549	chr2	215227340	215227840	MACS_peak_1859	0.77	0.616	chr2	215227460	215227720	MACS_peak_1859	0.47	0.723077	85.93
MACS_peak_1859	chr2-215227534-215227934	21.5051	2.48706	0.131785	chr2	215227340	215227840	MACS_peak_1859	0.765	0.612	chr2	215227460	215227720	MACS_peak_1859	0.465	0.715385	85.93
MACS_peak_1859	chr2-215227313-215227713	8.1918	2.14747	0.26888	chr2	215227340	215227840	MACS_peak_1859	0.9325	0.746	chr2	215227460	215227720	MACS_peak_1859	0.6325	0.973077	85.93
MACS_peak_1859	chr2-215227376-215227776	6.27535	1.63701	0.356151	chr2	215227340	215227840	MACS_peak_1859	1	0.8	chr2	215227460	215227720	MACS_peak_1859	0.65	1	85.93
MACS_peak_1859	chr2-215227380-215227780	16.9925	1.00372	0.623035	chr2	215227340	215227840	MACS_peak_1859	1	0.8	chr2	215227460	215227720	MACS_peak_1859	0.65	1	85.93
MACS_peak_1859	chr2-215227312-215227712	13.222	0.529649	0.854469	chr2	215227340	215227840	MACS_peak_1859	0.93	0.744	chr2	215227460	215227720	MACS_peak_1859	0.63	0.969231	85.93
MACS_peak_1859	chr2-215227448-215227848	16.9721	0.156789	0.970463	chr2	215227340	215227840	MACS_peak_1859	0.98	0.784	chr2	215227460	215227720	MACS_peak_1859	0.65	1	85.93
MACS_peak_1859	chr2-215227378-215227778	18.222	0.0861746	0.970463	chr2	215227340	215227840	MACS_peak_1859	1	0.8	chr2	215227460	215227720	MACS_peak_1859	0.65	1	85.93
MACS_peak_1859	chr2-215227536-215227936	38.8183	0.0775711	0.970463	chr2	215227340	215227840	MACS_peak_1859	0.76	0.608	chr2	215227460	215227720	MACS_peak_1859	0.46	0.707692	85.93
MACS_peak_1859	chr2-215227455-215227855	24.5999	-0.528864	0.819949	chr2	215227340	215227840	MACS_peak_1859	0.9625	0.77	chr2	215227460	215227720	MACS_peak_1859	0.65	1	85.93
MACS_peak_1859	chr2-215227535-215227935	26.4734	-0.681343	0.811886	chr2	215227340	215227840	MACS_peak_1859	0.7625	0.61	chr2	215227460	215227720	MACS_peak_1859	0.4625	0.711538	85.93
MACS_peak_1859	chr2-215227356-215227756	7.18566	-1.54258	0.334433	chr2	215227340	215227840	MACS_peak_1859	1	0.8	chr2	215227460	215227720	MACS_peak_1859	0.65	1	85.93
MACS_peak_1859	chr2-215227314-215227714	22.1712	-1.80817	0.277624	chr2	215227340	215227840	MACS_peak_1859	0.935	0.748	chr2	215227460	215227720	MACS_peak_1859	0.635	0.976923	85.93
MACS_peak_1859	chr2-215227377-215227777	10.1753	-2.54318	0.175178	chr2	215227340	215227840	MACS_peak_1859	1	0.8	chr2	215227460	215227720	MACS_peak_1859	0.65	1	85.93
MACS_peak_1860	chr2-216002514-216002914	34.0936	4.91479	0.00170828	chr2	216002454	216002954	MACS_peak_1860	1	0.8	chr2	216002437	216002971	MACS_peak_1860	1	0.749064	132.74
MACS_peak_1860	chr2-216002429-216002829	29.3413	4.46708	0.00873703	chr2	216002454	216002954	MACS_peak_1860	0.9375	0.75	chr2	216002437	216002971	MACS_peak_1860	0.98	0.734082	132.74
MACS_peak_1860	chr2-216002431-216002831	12.9548	3.48497	0.0534783	chr2	216002454	216002954	MACS_peak_1860	0.9425	0.754	chr2	216002437	216002971	MACS_peak_1860	0.985	0.737828	132.74
MACS_peak_1860	chr2-216002430-216002830	8.43252	2.63806	0.0949046	chr2	216002454	216002954	MACS_peak_1860	0.94	0.752	chr2	216002437	216002971	MACS_peak_1860	0.9825	0.735955	132.74
MACS_peak_1860	chr2-216002547-216002947	133.349	1.80387	0.175178	chr2	216002454	216002954	MACS_peak_1860	1	0.8	chr2	216002437	216002971	MACS_peak_1860	1	0.749064	132.74
MACS_peak_1860	chr2-216002376-216002776	11.5532	1.47281	0.389011	chr2	216002454	216002954	MACS_peak_1860	0.805	0.644	chr2	216002437	216002971	MACS_peak_1860	0.8475	0.634831	132.74
MACS_peak_1860	chr2-216002515-216002915	56.2379	1.27498	0.452145	chr2	216002454	216002954	MACS_peak_1860	1	0.8	chr2	216002437	216002971	MACS_peak_1860	1	0.749064	132.74
MACS_peak_1860	chr2-216002545-216002945	46.0789	1.11967	0.449499	chr2	216002454	216002954	MACS_peak_1860	1	0.8	chr2	216002437	216002971	MACS_peak_1860	1	0.749064	132.74
MACS_peak_1860	chr2-216002428-216002828	13.162	1.0076	0.563371	chr2	216002454	216002954	MACS_peak_1860	0.935	0.748	chr2	216002437	216002971	MACS_peak_1860	0.9775	0.73221	132.74
MACS_peak_1860	chr2-216002374-216002774	9.65933	0.803099	0.669633	chr2	216002454	216002954	MACS_peak_1860	0.8	0.64	chr2	216002437	216002971	MACS_peak_1860	0.8425	0.631086	132.74
MACS_peak_1860	chr2-216002424-216002824	12.7961	-1.19673	0.504851	chr2	216002454	216002954	MACS_peak_1860	0.925	0.74	chr2	216002437	216002971	MACS_peak_1860	0.9675	0.724719	132.74
MACS_peak_1862	chr2-217059378-217059778	9.24522	1.11582	0.60184	chr2	217059410	217059910	MACS_peak_1862	0.92	0.736	chr2	217059595	217059724	MACS_peak_1862	0.3225	1	84.76
MACS_peak_1862	chr2-217059373-217059773	17.3316	-0.255418	0.963221	chr2	217059410	217059910	MACS_peak_1862	0.9075	0.726	chr2	217059595	217059724	MACS_peak_1862	0.3225	1	84.76
MACS_peak_1862	chr2-217059380-217059780	6.73971	-0.492889	0.833415	chr2	217059410	217059910	MACS_peak_1862	0.925	0.74	chr2	217059595	217059724	MACS_peak_1862	0.3225	1	84.76
MACS_peak_1862	chr2-217059527-217059927	5.68194	-2.84766	0.0994549	chr2	217059410	217059910	MACS_peak_1862	0.9575	0.766	chr2	217059595	217059724	MACS_peak_1862	0.3225	1	84.76
MACS_peak_1862	chr2-217059308-217059708	8.99411	-2.86741	0.0746513	chr2	217059410	217059910	MACS_peak_1862	0.745	0.596	chr2	217059595	217059724	MACS_peak_1862	0.2825	0.875969	84.76
MACS_peak_1868	chr2-219199304-219199704	9.89911	0.108982	0.970463	chr2	219199376	219199876	MACS_peak_1868	0.82	0.656	chr2	219199455	219199797	MACS_peak_1868	0.6225	0.72807	79.76
MACS_peak_1872	chr2-220548953-220549353	6.33454	2.6381	0.127049	chr2	220549315	220549815	MACS_peak_1873	0.095	0.076	chr2	220549130	220549340	MACS_peak_1872	0.525	1	80.27
MACS_peak_1872	chr2-220548951-220549351	10.8397	0.972075	0.62739	chr2	220549315	220549815	MACS_peak_1873	0.09	0.072	chr2	220549130	220549340	MACS_peak_1872	0.525	1	80.27
MACS_peak_1873	chr2-220549217-220549617	9.54741	1.5401	0.362117	chr2	220549315	220549815	MACS_peak_1873	0.755	0.604	chr2	220549348	220549782	MACS_peak_1873	0.6725	0.619816	310.55
MACS_peak_1875	chr2-220674065-220674465	8.13188	2.48035	0.183069	chr2	220674163	220674663	MACS_peak_1875	0.755	0.604	chr2	220674224	220674602	MACS_peak_1875	0.6025	0.637566	84.36
MACS_peak_1875	chr2-220674331-220674731	7.58646	2.37675	0.145292	chr2	220674163	220674663	MACS_peak_1875	0.83	0.664	chr2	220674224	220674602	MACS_peak_1875	0.6775	0.716931	84.36
MACS_peak_1875	chr2-220674329-220674729	19.9618	1.56603	0.324292	chr2	220674163	220674663	MACS_peak_1875	0.835	0.668	chr2	220674224	220674602	MACS_peak_1875	0.6825	0.722222	84.36
MACS_peak_1875	chr2-220674330-220674730	17.1278	0.678436	0.732396	chr2	220674163	220674663	MACS_peak_1875	0.8325	0.666	chr2	220674224	220674602	MACS_peak_1875	0.68	0.719577	84.36
MACS_peak_1875	chr2-220674332-220674732	23.5349	-0.268366	0.941474	chr2	220674163	220674663	MACS_peak_1875	0.8275	0.662	chr2	220674224	220674602	MACS_peak_1875	0.675	0.714286	84.36
MACS_peak_1875	chr2-220674063-220674463	6.26103	-0.393343	0.880755	chr2	220674163	220674663	MACS_peak_1875	0.75	0.6	chr2	220674224	220674602	MACS_peak_1875	0.5975	0.632275	84.36
MACS_peak_1889	chr2-232320115-232320515	78.9657	0.19057	0.970463	chr2	232319978	232320478	MACS_peak_1889	0.9075	0.726	chr2	232320098	232320357	MACS_peak_1889	0.605	0.934363	73.63
MACS_peak_1889	chr2-232320117-232320517	24.112	-0.790129	0.717087	chr2	232319978	232320478	MACS_peak_1889	0.9025	0.722	chr2	232320098	232320357	MACS_peak_1889	0.6	0.926641	73.63
MACS_peak_1889	chr2-232320116-232320516	5.68194	-2.84766	0.0994549	chr2	232319978	232320478	MACS_peak_1889	0.905	0.724	chr2	232320098	232320357	MACS_peak_1889	0.6025	0.930502	73.63
MACS_peak_1898	chr20-6081719-6082119	46.3943	3.7484	0.00835017	chr20	6081837	6082337	MACS_peak_1898	0.705	0.564	chr20	6081939	6082235	MACS_peak_1898	0.45	0.608108	88.03
MACS_peak_1898	chr20-6081717-6082117	137.166	3.53855	0.00511471	chr20	6081837	6082337	MACS_peak_1898	0.7	0.56	chr20	6081939	6082235	MACS_peak_1898	0.445	0.601351	88.03
MACS_peak_1898	chr20-6081718-6082118	19.2455	3.51273	0.0421454	chr20	6081837	6082337	MACS_peak_1898	0.7025	0.562	chr20	6081939	6082235	MACS_peak_1898	0.4475	0.60473	88.03
MACS_peak_1898	chr20-6081745-6082145	160.302	1.90675	0.258354	chr20	6081837	6082337	MACS_peak_1898	0.77	0.616	chr20	6081939	6082235	MACS_peak_1898	0.515	0.695946	88.03
MACS_peak_1898	chr20-6081747-6082147	146.141	1.87747	0.35604	chr20	6081837	6082337	MACS_peak_1898	0.775	0.62	chr20	6081939	6082235	MACS_peak_1898	0.52	0.702703	88.03
MACS_peak_1898	chr20-6081743-6082143	381.845	1.6173	0.152367	chr20	6081837	6082337	MACS_peak_1898	0.765	0.612	chr20	6081939	6082235	MACS_peak_1898	0.51	0.689189	88.03
MACS_peak_1898	chr20-6081744-6082144	167.224	1.47149	0.19832	chr20	6081837	6082337	MACS_peak_1898	0.7675	0.614	chr20	6081939	6082235	MACS_peak_1898	0.5125	0.692568	88.03
MACS_peak_1898	chr20-6081752-6082152	5.68194	-2.84766	0.0994549	chr20	6081837	6082337	MACS_peak_1898	0.7875	0.63	chr20	6081939	6082235	MACS_peak_1898	0.5325	0.719595	88.03
MACS_peak_1900	chr20-7539688-7540088	9.38686	1.67105	0.382276	chr20	7539545	7540045	MACS_peak_1900	0.8925	0.714	chr20	7539669	7539920	MACS_peak_1900	0.58	0.924303	63.28
MACS_peak_1900	chr20-7539686-7540086	8.31407	0.606926	0.799038	chr20	7539545	7540045	MACS_peak_1900	0.8975	0.718	chr20	7539669	7539920	MACS_peak_1900	0.585	0.932271	63.28
MACS_peak_1900	chr20-7539684-7540084	17.137	-0.322201	0.887546	chr20	7539545	7540045	MACS_peak_1900	0.9025	0.722	chr20	7539669	7539920	MACS_peak_1900	0.59	0.940239	63.28
MACS_peak_1900	chr20-7539687-7540087	10.435	-0.564597	0.848677	chr20	7539545	7540045	MACS_peak_1900	0.895	0.716	chr20	7539669	7539920	MACS_peak_1900	0.5825	0.928287	63.28
MACS_peak_1900	chr20-7539685-7540085	12.3652	-0.704203	0.70765	chr20	7539545	7540045	MACS_peak_1900	0.9	0.72	chr20	7539669	7539920	MACS_peak_1900	0.5875	0.936255	63.28
MACS_peak_1901	chr20-7752941-7753341	22.0012	3.60308	0.0534783	chr20	7752955	7753455	MACS_peak_1901	0.965	0.772	chr20	7753043	7753367	MACS_peak_1901	0.745	0.919753	70.91
MACS_peak_1901	chr20-7752942-7753342	6.02577	3.06077	0.0854051	chr20	7752955	7753455	MACS_peak_1901	0.9675	0.774	chr20	7753043	7753367	MACS_peak_1901	0.7475	0.92284	70.91
MACS_peak_1901	chr20-7752944-7753344	17.4333	1.51207	0.329069	chr20	7752955	7753455	MACS_peak_1901	0.9725	0.778	chr20	7753043	7753367	MACS_peak_1901	0.7525	0.929012	70.91
MACS_peak_1901	chr20-7752946-7753346	19.9053	0.951171	0.569944	chr20	7752955	7753455	MACS_peak_1901	0.9775	0.782	chr20	7753043	7753367	MACS_peak_1901	0.7575	0.935185	70.91
MACS_peak_1901	chr20-7752943-7753343	33.5349	0.41648	0.879112	chr20	7752955	7753455	MACS_peak_1901	0.97	0.776	chr20	7753043	7753367	MACS_peak_1901	0.75	0.925926	70.91
MACS_peak_1901	chr20-7752945-7753345	14.8595	0.229611	0.947071	chr20	7752955	7753455	MACS_peak_1901	0.975	0.78	chr20	7753043	7753367	MACS_peak_1901	0.755	0.932099	70.91
MACS_peak_1903	chr20-10100016-10100416	56.8835	5.08878	0.00016653	chr20	10099857	10100357	MACS_peak_1903	0.8525	0.682	chr20	10099845	10100368	MACS_peak_1903	0.88	0.67304	157.94
MACS_peak_1903	chr20-10100017-10100417	277.262	3.83671	0.000557793	chr20	10099857	10100357	MACS_peak_1903	0.85	0.68	chr20	10099845	10100368	MACS_peak_1903	0.8775	0.671128	157.94
MACS_peak_1903	chr20-10100015-10100415	415.306	3.78501	0.0147316	chr20	10099857	10100357	MACS_peak_1903	0.855	0.684	chr20	10099845	10100368	MACS_peak_1903	0.8825	0.674952	157.94
MACS_peak_1903	chr20-10099802-10100202	41.1853	3.33861	0.0337831	chr20	10099857	10100357	MACS_peak_1903	0.8625	0.69	chr20	10099845	10100368	MACS_peak_1903	0.8925	0.6826	157.94
MACS_peak_1903	chr20-10099878-10100278	117.278	3.09119	0.0261939	chr20	10099857	10100357	MACS_peak_1903	1	0.8	chr20	10099845	10100368	MACS_peak_1903	1	0.764818	157.94
MACS_peak_1903	chr20-10099871-10100271	8.33164	3.40967	0.0534783	chr20	10099857	10100357	MACS_peak_1903	1	0.8	chr20	10099845	10100368	MACS_peak_1903	1	0.764818	157.94
MACS_peak_1903	chr20-10099803-10100203	12.825	3.07472	0.0994549	chr20	10099857	10100357	MACS_peak_1903	0.865	0.692	chr20	10099845	10100368	MACS_peak_1903	0.895	0.684512	157.94
MACS_peak_1903	chr20-10099879-10100279	146.93	2.45682	0.0942255	chr20	10099857	10100357	MACS_peak_1903	1	0.8	chr20	10099845	10100368	MACS_peak_1903	1	0.764818	157.94
MACS_peak_1903	chr20-10099800-10100200	24.6039	1.65149	0.33868	chr20	10099857	10100357	MACS_peak_1903	0.8575	0.686	chr20	10099845	10100368	MACS_peak_1903	0.8875	0.678776	157.94
MACS_peak_1903	chr20-10099801-10100201	16.4108	1.54465	0.3869	chr20	10099857	10100357	MACS_peak_1903	0.86	0.688	chr20	10099845	10100368	MACS_peak_1903	0.89	0.680688	157.94
MACS_peak_1903	chr20-10099867-10100267	51.5059	1.43004	0.359769	chr20	10099857	10100357	MACS_peak_1903	1	0.8	chr20	10099845	10100368	MACS_peak_1903	1	0.764818	157.94
MACS_peak_1903	chr20-10099865-10100265	40.4165	1.31833	0.487334	chr20	10099857	10100357	MACS_peak_1903	1	0.8	chr20	10099845	10100368	MACS_peak_1903	1	0.764818	157.94
MACS_peak_1903	chr20-10099880-10100280	104.574	1.2493	0.477694	chr20	10099857	10100357	MACS_peak_1903	1	0.8	chr20	10099845	10100368	MACS_peak_1903	1	0.764818	157.94
MACS_peak_1906	chr20-15285025-15285425	15.261	2.78453	0.0593264							chr20	15285022	15285187	MACS_peak_1906	0.405	0.981818	58.95
MACS_peak_1906	chr20-15285023-15285423	18.7333	1.6994	0.26531							chr20	15285022	15285187	MACS_peak_1906	0.41	0.993939	58.95
MACS_peak_1906	chr20-15285026-15285426	10.3086	1.63897	0.388293							chr20	15285022	15285187	MACS_peak_1906	0.4025	0.975758	58.95
MACS_peak_1906	chr20-15285024-15285424	13.4712	-0.14061	0.970463							chr20	15285022	15285187	MACS_peak_1906	0.4075	0.987879	58.95
MACS_peak_1907	chr20-15654235-15654635	15.2612	4.07509	0.0298645	chr20	15654121	15654621	MACS_peak_1907	0.965	0.772	chr20	15654275	15654467	MACS_peak_1907	0.48	1	67.96
MACS_peak_1907	chr20-15654127-15654527	14.9318	2.22694	0.203362	chr20	15654121	15654621	MACS_peak_1907	1	0.8	chr20	15654275	15654467	MACS_peak_1907	0.48	1	67.96
MACS_peak_1907	chr20-15654266-15654666	60.341	1.04635	0.627322	chr20	15654121	15654621	MACS_peak_1907	0.8875	0.71	chr20	15654275	15654467	MACS_peak_1907	0.48	1	67.96
MACS_peak_1907	chr20-15654126-15654526	84.1397	0.561814	0.830519	chr20	15654121	15654621	MACS_peak_1907	1	0.8	chr20	15654275	15654467	MACS_peak_1907	0.48	1	67.96
MACS_peak_1907	chr20-15654265-15654665	22.4236	0.155471	0.970463	chr20	15654121	15654621	MACS_peak_1907	0.89	0.712	chr20	15654275	15654467	MACS_peak_1907	0.48	1	67.96
MACS_peak_1907	chr20-15654128-15654528	67.3131	0.131357	0.970463	chr20	15654121	15654621	MACS_peak_1907	1	0.8	chr20	15654275	15654467	MACS_peak_1907	0.48	1	67.96
MACS_peak_1907	chr20-15654264-15654664	84.1072	0.0312086	0.982341	chr20	15654121	15654621	MACS_peak_1907	0.8925	0.714	chr20	15654275	15654467	MACS_peak_1907	0.48	1	67.96
MACS_peak_1911	chr20-18832779-18833179	25.3816	4.37128	0.00479238	chr20	18832886	18833386	MACS_peak_1911	0.7325	0.586	chr20	18832965	18833306	MACS_peak_1911	0.535	0.627566	64.42
MACS_peak_1911	chr20-18832816-18833216	10.7461	2.91054	0.0609462	chr20	18832886	18833386	MACS_peak_1911	0.825	0.66	chr20	18832965	18833306	MACS_peak_1911	0.6275	0.73607	64.42
MACS_peak_1911	chr20-18832835-18833235	15.8134	2.35238	0.135167	chr20	18832886	18833386	MACS_peak_1911	0.8725	0.698	chr20	18832965	18833306	MACS_peak_1911	0.675	0.791789	64.42
MACS_peak_1911	chr20-18832781-18833181	37.3635	1.34129	0.401574	chr20	18832886	18833386	MACS_peak_1911	0.7375	0.59	chr20	18832965	18833306	MACS_peak_1911	0.54	0.633431	64.42
MACS_peak_1911	chr20-18832800-18833200	6.23694	1.14647	0.548846	chr20	18832886	18833386	MACS_peak_1911	0.785	0.628	chr20	18832965	18833306	MACS_peak_1911	0.5875	0.68915	64.42
MACS_peak_1911	chr20-18832814-18833214	8.6917	0.870161	0.672422	chr20	18832886	18833386	MACS_peak_1911	0.82	0.656	chr20	18832965	18833306	MACS_peak_1911	0.6225	0.730205	64.42
MACS_peak_1911	chr20-18832798-18833198	9.92947	-0.308684	0.90773	chr20	18832886	18833386	MACS_peak_1911	0.78	0.624	chr20	18832965	18833306	MACS_peak_1911	0.5825	0.683284	64.42
MACS_peak_1911	chr20-18832815-18833215	6.43877	-2.28681	0.223161	chr20	18832886	18833386	MACS_peak_1911	0.8225	0.658	chr20	18832965	18833306	MACS_peak_1911	0.625	0.733138	64.42
MACS_peak_1918	chr20-23360389-23360789	15.3528	3.37665	0.06671	chr20	23360199	23360699	MACS_peak_1918	0.775	0.62	chr20	23360334	23360563	MACS_peak_1918	0.435	0.759825	60.82
MACS_peak_1918	chr20-23360127-23360527	7.18818	1.54875	0.380822	chr20	23360199	23360699	MACS_peak_1918	0.82	0.656	chr20	23360334	23360563	MACS_peak_1918	0.4825	0.842795	60.82
MACS_peak_1918	chr20-23360391-23360791	50.4473	1.04662	0.547436	chr20	23360199	23360699	MACS_peak_1918	0.77	0.616	chr20	23360334	23360563	MACS_peak_1918	0.43	0.751092	60.82
MACS_peak_1918	chr20-23360125-23360525	19.0915	0.204972	0.951906	chr20	23360199	23360699	MACS_peak_1918	0.815	0.652	chr20	23360334	23360563	MACS_peak_1918	0.4775	0.834061	60.82
MACS_peak_1918	chr20-23360126-23360526	9.36082	-1.11378	0.604929	chr20	23360199	23360699	MACS_peak_1918	0.8175	0.654	chr20	23360334	23360563	MACS_peak_1918	0.48	0.838428	60.82
MACS_peak_1919	chr20-24068217-24068617	7.92233	0.939541	0.633273	chr20	24068159	24068659	MACS_peak_1919	1	0.8	chr20	24068309	24068509	MACS_peak_1919	0.5	1	64.32
MACS_peak_1919	chr20-24068195-24068595	6.78022	-0.129543	0.970463	chr20	24068159	24068659	MACS_peak_1919	1	0.8	chr20	24068309	24068509	MACS_peak_1919	0.5	1	64.32
MACS_peak_1919	chr20-24068218-24068618	8.62516	-0.472278	0.862398	chr20	24068159	24068659	MACS_peak_1919	1	0.8	chr20	24068309	24068509	MACS_peak_1919	0.5	1	64.32
MACS_peak_1919	chr20-24068315-24068715	8.18829	-0.592671	0.830441	chr20	24068159	24068659	MACS_peak_1919	0.86	0.688	chr20	24068309	24068509	MACS_peak_1919	0.485	0.97	64.32
MACS_peak_1919	chr20-24068219-24068619	8.77196	-0.640408	0.749686	chr20	24068159	24068659	MACS_peak_1919	1	0.8	chr20	24068309	24068509	MACS_peak_1919	0.5	1	64.32
MACS_peak_1919	chr20-24068194-24068594	9.468	-0.788809	0.672195	chr20	24068159	24068659	MACS_peak_1919	1	0.8	chr20	24068309	24068509	MACS_peak_1919	0.5	1	64.32
MACS_peak_1919	chr20-24068196-24068596	6.22077	-1.13113	0.60849	chr20	24068159	24068659	MACS_peak_1919	1	0.8	chr20	24068309	24068509	MACS_peak_1919	0.5	1	64.32
MACS_peak_1919	chr20-24068193-24068593	13.0514	-1.5843	0.305281	chr20	24068159	24068659	MACS_peak_1919	1	0.8	chr20	24068309	24068509	MACS_peak_1919	0.5	1	64.32
MACS_peak_1919	chr20-24068317-24068717	7.08183	-2.26029	0.147402	chr20	24068159	24068659	MACS_peak_1919	0.855	0.684	chr20	24068309	24068509	MACS_peak_1919	0.48	0.96	64.32
MACS_peak_1920	chr20-24539990-24540390	16.3213	0.687587	0.796789	chr20	24540044	24540544	MACS_peak_1920	0.865	0.692	chr20	24540164	24540424	MACS_peak_1920	0.565	0.869231	83.14
MACS_peak_1920	chr20-24539991-24540391	9.2446	0.663189	0.754447	chr20	24540044	24540544	MACS_peak_1920	0.8675	0.694	chr20	24540164	24540424	MACS_peak_1920	0.5675	0.873077	83.14
MACS_peak_1920	chr20-24540145-24540545	102.785	0.0686936	0.970463	chr20	24540044	24540544	MACS_peak_1920	0.9975	0.798	chr20	24540164	24540424	MACS_peak_1920	0.65	1	83.14
MACS_peak_1920	chr20-24540086-24540486	105.858	-0.122191	0.970463	chr20	24540044	24540544	MACS_peak_1920	1	0.8	chr20	24540164	24540424	MACS_peak_1920	0.65	1	83.14
MACS_peak_1920	chr20-24540069-24540469	6.69167	-0.156313	0.970463	chr20	24540044	24540544	MACS_peak_1920	1	0.8	chr20	24540164	24540424	MACS_peak_1920	0.65	1	83.14
MACS_peak_1920	chr20-24540084-24540484	103.635	-0.274101	0.886931	chr20	24540044	24540544	MACS_peak_1920	1	0.8	chr20	24540164	24540424	MACS_peak_1920	0.65	1	83.14
MACS_peak_1920	chr20-24540085-24540485	65.3453	-0.291993	0.888596	chr20	24540044	24540544	MACS_peak_1920	1	0.8	chr20	24540164	24540424	MACS_peak_1920	0.65	1	83.14
MACS_peak_1920	chr20-24540070-24540470	9.24407	-0.408681	0.880902	chr20	24540044	24540544	MACS_peak_1920	1	0.8	chr20	24540164	24540424	MACS_peak_1920	0.65	1	83.14
MACS_peak_1920	chr20-24539993-24540393	21.6462	-0.789582	0.64084	chr20	24540044	24540544	MACS_peak_1920	0.8725	0.698	chr20	24540164	24540424	MACS_peak_1920	0.5725	0.880769	83.14
MACS_peak_1920	chr20-24539992-24540392	7.96369	-1.12938	0.545847	chr20	24540044	24540544	MACS_peak_1920	0.87	0.696	chr20	24540164	24540424	MACS_peak_1920	0.57	0.876923	83.14
MACS_peak_1920	chr20-24540147-24540547	229.48	-1.1342	0.381793	chr20	24540044	24540544	MACS_peak_1920	0.9925	0.794	chr20	24540164	24540424	MACS_peak_1920	0.65	1	83.14
MACS_peak_1920	chr20-24540072-24540472	14.9143	-1.26076	0.443744	chr20	24540044	24540544	MACS_peak_1920	1	0.8	chr20	24540164	24540424	MACS_peak_1920	0.65	1	83.14
MACS_peak_1920	chr20-24540071-24540471	6.95886	-1.40791	0.430617	chr20	24540044	24540544	MACS_peak_1920	1	0.8	chr20	24540164	24540424	MACS_peak_1920	0.65	1	83.14
MACS_peak_1925	chr20-29648049-29648449	40.3193	2.17379	0.206418	chr20	29648038	29648538	MACS_peak_1925	1	0.8	chr20	29647999	29648576	MACS_peak_1925	1	0.693241	66.67
MACS_peak_1925	chr20-29648219-29648619	29.2069	0.560396	0.786619	chr20	29648038	29648538	MACS_peak_1925	0.7975	0.638	chr20	29647999	29648576	MACS_peak_1925	0.8925	0.618718	66.67
MACS_peak_1925	chr20-29648077-29648477	6.78273	0.232364	0.954641	chr20	29648038	29648538	MACS_peak_1925	1	0.8	chr20	29647999	29648576	MACS_peak_1925	1	0.693241	66.67
MACS_peak_1925	chr20-29647976-29648376	17.106	0.113128	0.970463	chr20	29648038	29648538	MACS_peak_1925	0.845	0.676	chr20	29647999	29648576	MACS_peak_1925	0.9425	0.65338	66.67
MACS_peak_1925	chr20-29648051-29648451	660.318	-0.31257	0.875762	chr20	29648038	29648538	MACS_peak_1925	1	0.8	chr20	29647999	29648576	MACS_peak_1925	1	0.693241	66.67
MACS_peak_1925	chr20-29647957-29648357	14.9283	-0.538142	0.861896	chr20	29648038	29648538	MACS_peak_1925	0.7975	0.638	chr20	29647999	29648576	MACS_peak_1925	0.895	0.620451	66.67
MACS_peak_1925	chr20-29648221-29648621	94.6774	-0.974216	0.539414	chr20	29648038	29648538	MACS_peak_1925	0.7925	0.634	chr20	29647999	29648576	MACS_peak_1925	0.8875	0.615251	66.67
MACS_peak_1925	chr20-29647947-29648347	53.2963	-1.10664	0.504956	chr20	29648038	29648538	MACS_peak_1925	0.7725	0.618	chr20	29647999	29648576	MACS_peak_1925	0.87	0.60312	66.67
MACS_peak_1925	chr20-29648075-29648475	14.1401	-1.12338	0.507741	chr20	29648038	29648538	MACS_peak_1925	1	0.8	chr20	29647999	29648576	MACS_peak_1925	1	0.693241	66.67
MACS_peak_1925	chr20-29648220-29648620	15.8396	-1.21365	0.48002	chr20	29648038	29648538	MACS_peak_1925	0.795	0.636	chr20	29647999	29648576	MACS_peak_1925	0.89	0.616984	66.67
MACS_peak_1925	chr20-29648218-29648618	23.7244	-1.26421	0.559764	chr20	29648038	29648538	MACS_peak_1925	0.8	0.64	chr20	29647999	29648576	MACS_peak_1925	0.895	0.620451	66.67
MACS_peak_1925	chr20-29647977-29648377	5.7528	-1.30557	0.459393	chr20	29648038	29648538	MACS_peak_1925	0.8475	0.678	chr20	29647999	29648576	MACS_peak_1925	0.945	0.655113	66.67
MACS_peak_1925	chr20-29648087-29648487	35.3256	-1.3517	0.466202	chr20	29648038	29648538	MACS_peak_1925	1	0.8	chr20	29647999	29648576	MACS_peak_1925	1	0.693241	66.67
MACS_peak_1925	chr20-29648076-29648476	10.0908	-2.17658	0.180168	chr20	29648038	29648538	MACS_peak_1925	1	0.8	chr20	29647999	29648576	MACS_peak_1925	1	0.693241	66.67
MACS_peak_1925	chr20-29647946-29648346	10.1753	-2.54318	0.175178	chr20	29648038	29648538	MACS_peak_1925	0.77	0.616	chr20	29647999	29648576	MACS_peak_1925	0.8675	0.601386	66.67
MACS_peak_1931	chr20-34039026-34039426	7.26822	3.49693	0.0362369	chr20	34039061	34039561	MACS_peak_1931	0.9125	0.73	chr20	34039113	34039509	MACS_peak_1931	0.7825	0.790404	150.81
MACS_peak_1931	chr20-34039093-34039493	91.8093	3.23757	0.0534783	chr20	34039061	34039561	MACS_peak_1931	1	0.8	chr20	34039113	34039509	MACS_peak_1931	0.95	0.959596	150.81
MACS_peak_1933	chr20-35869583-35869983	19.8426	0.788123	0.777727	chr20	35869563	35870063	MACS_peak_1933	1	0.8	chr20	35869688	35869938	MACS_peak_1933	0.625	1	60.95
MACS_peak_1933	chr20-35869702-35870102	2663.26	-0.924842	0.536825	chr20	35869563	35870063	MACS_peak_1933	0.9025	0.722	chr20	35869688	35869938	MACS_peak_1933	0.59	0.944	60.95
MACS_peak_1933	chr20-35869584-35869984	12.6984	-1.35993	0.529477	chr20	35869563	35870063	MACS_peak_1933	1	0.8	chr20	35869688	35869938	MACS_peak_1933	0.625	1	60.95
MACS_peak_1933	chr20-35869585-35869985	7.67208	-1.46341	0.374287	chr20	35869563	35870063	MACS_peak_1933	1	0.8	chr20	35869688	35869938	MACS_peak_1933	0.625	1	60.95
MACS_peak_1934	chr20-35877011-35877411	10.1921	-3.54852	0.0534783	chr20	35877029	35877529	MACS_peak_1934	0.955	0.764	chr20	35877153	35877404	MACS_peak_1934	0.6275	1	63.28
MACS_peak_1936	chr20-40494499-40494899	28.3555	3.49464	0.0268811	chr20	40494532	40495032	MACS_peak_1936	0.9175	0.734	chr20	40494698	40494866	MACS_peak_1936	0.42	1	61.24
MACS_peak_1936	chr20-40494501-40494901	10.5191	2.74091	0.132187	chr20	40494532	40495032	MACS_peak_1936	0.9225	0.738	chr20	40494698	40494866	MACS_peak_1936	0.42	1	61.24
MACS_peak_1936	chr20-40494611-40495011	10.6584	2.69221	0.0994549	chr20	40494532	40495032	MACS_peak_1936	1	0.8	chr20	40494698	40494866	MACS_peak_1936	0.42	1	61.24
MACS_peak_1936	chr20-40494523-40494923	9.7891	2.6041	0.0994549	chr20	40494532	40495032	MACS_peak_1936	0.9775	0.782	chr20	40494698	40494866	MACS_peak_1936	0.42	1	61.24
MACS_peak_1936	chr20-40494610-40495010	21.8965	2.19061	0.213008	chr20	40494532	40495032	MACS_peak_1936	1	0.8	chr20	40494698	40494866	MACS_peak_1936	0.42	1	61.24
MACS_peak_1936	chr20-40494500-40494900	8.1918	2.14747	0.26888	chr20	40494532	40495032	MACS_peak_1936	0.92	0.736	chr20	40494698	40494866	MACS_peak_1936	0.42	1	61.24
MACS_peak_1936	chr20-40494524-40494924	17.6423	1.99003	0.211501	chr20	40494532	40495032	MACS_peak_1936	0.98	0.784	chr20	40494698	40494866	MACS_peak_1936	0.42	1	61.24
MACS_peak_1936	chr20-40494497-40494897	37.9892	1.96578	0.171106	chr20	40494532	40495032	MACS_peak_1936	0.9125	0.73	chr20	40494698	40494866	MACS_peak_1936	0.42	1	61.24
MACS_peak_1936	chr20-40494565-40494965	5.79267	1.90247	0.304129	chr20	40494532	40495032	MACS_peak_1936	1	0.8	chr20	40494698	40494866	MACS_peak_1936	0.42	1	61.24
MACS_peak_1936	chr20-40494498-40494898	8.21229	1.75568	0.304995	chr20	40494532	40495032	MACS_peak_1936	0.915	0.732	chr20	40494698	40494866	MACS_peak_1936	0.42	1	61.24
MACS_peak_1936	chr20-40494564-40494964	18.9359	1.7308	0.326465	chr20	40494532	40495032	MACS_peak_1936	1	0.8	chr20	40494698	40494866	MACS_peak_1936	0.42	1	61.24
MACS_peak_1936	chr20-40494612-40495012	14.692	1.67044	0.320523	chr20	40494532	40495032	MACS_peak_1936	1	0.8	chr20	40494698	40494866	MACS_peak_1936	0.42	1	61.24
MACS_peak_1936	chr20-40494613-40495013	73.0824	1.64055	0.35402	chr20	40494532	40495032	MACS_peak_1936	1	0.8	chr20	40494698	40494866	MACS_peak_1936	0.42	1	61.24
MACS_peak_1936	chr20-40494589-40494989	17.2733	1.59232	0.409395	chr20	40494532	40495032	MACS_peak_1936	1	0.8	chr20	40494698	40494866	MACS_peak_1936	0.42	1	61.24
MACS_peak_1936	chr20-40494496-40494896	22.868	1.43447	0.362953	chr20	40494532	40495032	MACS_peak_1936	0.91	0.728	chr20	40494698	40494866	MACS_peak_1936	0.42	1	61.24
MACS_peak_1936	chr20-40494566-40494966	24.0274	1.1071	0.525389	chr20	40494532	40495032	MACS_peak_1936	1	0.8	chr20	40494698	40494866	MACS_peak_1936	0.42	1	61.24
MACS_peak_1936	chr20-40494590-40494990	23.2889	0.777316	0.672971	chr20	40494532	40495032	MACS_peak_1936	1	0.8	chr20	40494698	40494866	MACS_peak_1936	0.42	1	61.24
MACS_peak_1936	chr20-40494614-40495014	27.1888	0.761181	0.719536	chr20	40494532	40495032	MACS_peak_1936	1	0.8	chr20	40494698	40494866	MACS_peak_1936	0.42	1	61.24
MACS_peak_1936	chr20-40494522-40494922	17.2071	0.652112	0.746926	chr20	40494532	40495032	MACS_peak_1936	0.975	0.78	chr20	40494698	40494866	MACS_peak_1936	0.42	1	61.24
MACS_peak_1936	chr20-40494591-40494991	5.68544	0.0955583	0.970463	chr20	40494532	40495032	MACS_peak_1936	1	0.8	chr20	40494698	40494866	MACS_peak_1936	0.42	1	61.24
MACS_peak_1936	chr20-40494588-40494988	27.9366	-0.229281	0.949566	chr20	40494532	40495032	MACS_peak_1936	1	0.8	chr20	40494698	40494866	MACS_peak_1936	0.42	1	61.24
MACS_peak_1936	chr20-40494400-40494800	8.10723	-0.989207	0.617671	chr20	40494532	40495032	MACS_peak_1936	0.67	0.536	chr20	40494698	40494866	MACS_peak_1936	0.255	0.607143	61.24
MACS_peak_1937	chr20-42274789-42275189	8.33164	3.40967	0.0534783	chr20	42274689	42275189	MACS_peak_1937	1	0.8	chr20	42274811	42275066	MACS_peak_1937	0.6375	1	72.06
MACS_peak_1937	chr20-42274908-42275308	5.81528	1.59546	0.444703	chr20	42274689	42275189	MACS_peak_1937	0.7025	0.562	chr20	42274811	42275066	MACS_peak_1937	0.395	0.619608	72.06
MACS_peak_1937	chr20-42274872-42275272	144.511	0.0236085	0.991102	chr20	42274689	42275189	MACS_peak_1937	0.7925	0.634	chr20	42274811	42275066	MACS_peak_1937	0.485	0.760784	72.06
MACS_peak_1937	chr20-42274906-42275306	17.0509	-0.797075	0.691535	chr20	42274689	42275189	MACS_peak_1937	0.7075	0.566	chr20	42274811	42275066	MACS_peak_1937	0.4	0.627451	72.06
MACS_peak_1937	chr20-42274907-42275307	60.3185	-1.48944	0.287111	chr20	42274689	42275189	MACS_peak_1937	0.705	0.564	chr20	42274811	42275066	MACS_peak_1937	0.3975	0.623529	72.06
MACS_peak_1937	chr20-42274716-42275116	6.07949	-1.5418	0.404229	chr20	42274689	42275189	MACS_peak_1937	1	0.8	chr20	42274811	42275066	MACS_peak_1937	0.6375	1	72.06
MACS_peak_1937	chr20-42274790-42275190	8.40066	-1.63722	0.340021	chr20	42274689	42275189	MACS_peak_1937	0.9975	0.798	chr20	42274811	42275066	MACS_peak_1937	0.6375	1	72.06
MACS_peak_1937	chr20-42274859-42275259	8.73992	-1.74085	0.291887	chr20	42274689	42275189	MACS_peak_1937	0.825	0.66	chr20	42274811	42275066	MACS_peak_1937	0.5175	0.811765	72.06
MACS_peak_1937	chr20-42274904-42275304	35.7036	-1.76324	0.211527	chr20	42274689	42275189	MACS_peak_1937	0.7125	0.57	chr20	42274811	42275066	MACS_peak_1937	0.405	0.635294	72.06
MACS_peak_1937	chr20-42274905-42275305	6.06446	-2.43602	0.121732	chr20	42274689	42275189	MACS_peak_1937	0.71	0.568	chr20	42274811	42275066	MACS_peak_1937	0.4025	0.631373	72.06
MACS_peak_194	chr1-185114435-185114835	57.1899	2.46341	0.125843	chr1	185114231	185114731	MACS_peak_194	0.74	0.592	chr1	185114382	185114580	MACS_peak_194	0.3625	0.732323	63.83
MACS_peak_194	chr1-185114438-185114838	77.7314	2.27085	0.166474	chr1	185114231	185114731	MACS_peak_194	0.7325	0.586	chr1	185114382	185114580	MACS_peak_194	0.355	0.717172	63.83
MACS_peak_194	chr1-185114370-185114770	27.7443	1.33882	0.422564	chr1	185114231	185114731	MACS_peak_194	0.9025	0.722	chr1	185114382	185114580	MACS_peak_194	0.495	1	63.83
MACS_peak_194	chr1-185114205-185114605	33.8071	1.04837	0.653898	chr1	185114231	185114731	MACS_peak_194	0.935	0.748	chr1	185114382	185114580	MACS_peak_194	0.495	1	63.83
MACS_peak_194	chr1-185114132-185114532	18.8384	0.999288	0.651582	chr1	185114231	185114731	MACS_peak_194	0.7525	0.602	chr1	185114382	185114580	MACS_peak_194	0.375	0.757576	63.83
MACS_peak_194	chr1-185114331-185114731	55.8084	0.809906	0.667517	chr1	185114231	185114731	MACS_peak_194	1	0.8	chr1	185114382	185114580	MACS_peak_194	0.495	1	63.83
MACS_peak_194	chr1-185114436-185114836	40.4765	0.134037	0.970463	chr1	185114231	185114731	MACS_peak_194	0.7375	0.59	chr1	185114382	185114580	MACS_peak_194	0.36	0.727273	63.83
MACS_peak_194	chr1-185114134-185114534	106.075	0.0211766	0.986528	chr1	185114231	185114731	MACS_peak_194	0.7575	0.606	chr1	185114382	185114580	MACS_peak_194	0.38	0.767677	63.83
MACS_peak_194	chr1-185114371-185114771	33.8517	-0.245312	0.966966	chr1	185114231	185114731	MACS_peak_194	0.9	0.72	chr1	185114382	185114580	MACS_peak_194	0.495	1	63.83
MACS_peak_194	chr1-185114332-185114732	55.6559	-0.245539	0.916697	chr1	185114231	185114731	MACS_peak_194	0.9975	0.798	chr1	185114382	185114580	MACS_peak_194	0.495	1	63.83
MACS_peak_194	chr1-185114434-185114834	49.4008	-0.269373	0.962424	chr1	185114231	185114731	MACS_peak_194	0.7425	0.594	chr1	185114382	185114580	MACS_peak_194	0.365	0.737374	63.83
MACS_peak_194	chr1-185114333-185114733	131.168	-0.321298	0.86651	chr1	185114231	185114731	MACS_peak_194	0.995	0.796	chr1	185114382	185114580	MACS_peak_194	0.495	1	63.83
MACS_peak_194	chr1-185114372-185114772	44.9474	-0.508212	0.809073	chr1	185114231	185114731	MACS_peak_194	0.8975	0.718	chr1	185114382	185114580	MACS_peak_194	0.495	1	63.83
MACS_peak_194	chr1-185114206-185114606	68.3139	-0.556233	0.811256	chr1	185114231	185114731	MACS_peak_194	0.9375	0.75	chr1	185114382	185114580	MACS_peak_194	0.495	1	63.83
MACS_peak_194	chr1-185114208-185114608	109.784	-0.793786	0.592797	chr1	185114231	185114731	MACS_peak_194	0.9425	0.754	chr1	185114382	185114580	MACS_peak_194	0.495	1	63.83
MACS_peak_194	chr1-185114207-185114607	37.6212	-1.89649	0.147215	chr1	185114231	185114731	MACS_peak_194	0.94	0.752	chr1	185114382	185114580	MACS_peak_194	0.495	1	63.83
MACS_peak_1949	chr20-49726773-49727173	5.68194	-2.84766	0.0994549							chr20	49726803	49726991	MACS_peak_1949	0.47	1	51.06
MACS_peak_1950	chr20-50594600-50595000	6.32416	2.38038	0.164245	chr20	50594409	50594909	MACS_peak_1950	0.7725	0.618	chr20	50594411	50594907	MACS_peak_1950	0.7675	0.618952	64.31
MACS_peak_1951	chr20-50595124-50595524	11.7295	0.254085	0.947462							chr20	50595206	50595605	MACS_peak_1951	0.795	0.796992	51.16
MACS_peak_1951	chr20-50595123-50595523	14.8968	0.0902722	0.970463							chr20	50595206	50595605	MACS_peak_1951	0.7925	0.794486	51.16
MACS_peak_1962	chr20-54196479-54196879	8.2359	2.89187	0.0855653	chr20	54196293	54196793	MACS_peak_1962	0.785	0.628	chr20	54196422	54196663	MACS_peak_1962	0.46	0.763485	60.5
MACS_peak_1962	chr20-54196179-54196579	6.98267	-1.03801	0.590624	chr20	54196293	54196793	MACS_peak_1962	0.715	0.572	chr20	54196422	54196663	MACS_peak_1962	0.3925	0.651452	60.5
MACS_peak_1962	chr20-54196477-54196877	7.05748	-1.21332	0.487334	chr20	54196293	54196793	MACS_peak_1962	0.79	0.632	chr20	54196422	54196663	MACS_peak_1962	0.465	0.771784	60.5
MACS_peak_1966	chr20-57478586-57478986	3201.72	0.302137	0.925363	chr20	57478429	57478929	MACS_peak_1966	0.8575	0.686	chr20	57478397	57478960	MACS_peak_1966	0.935	0.664298	101.32
MACS_peak_1966	chr20-57478567-57478967	42.4275	-0.43264	0.838618	chr20	57478429	57478929	MACS_peak_1966	0.905	0.724	chr20	57478397	57478960	MACS_peak_1966	0.9825	0.698046	101.32
MACS_peak_1966	chr20-57478582-57478982	2928.84	-0.559569	0.682758	chr20	57478429	57478929	MACS_peak_1966	0.8675	0.694	chr20	57478397	57478960	MACS_peak_1966	0.945	0.671403	101.32
MACS_peak_1966	chr20-57478568-57478968	121.24	-0.631677	0.770118	chr20	57478429	57478929	MACS_peak_1966	0.9025	0.722	chr20	57478397	57478960	MACS_peak_1966	0.98	0.69627	101.32
MACS_peak_1966	chr20-57478585-57478985	5255.37	-0.665871	0.544213	chr20	57478429	57478929	MACS_peak_1966	0.86	0.688	chr20	57478397	57478960	MACS_peak_1966	0.9375	0.666075	101.32
MACS_peak_1966	chr20-57478566-57478966	106.098	-0.871163	0.524433	chr20	57478429	57478929	MACS_peak_1966	0.9075	0.726	chr20	57478397	57478960	MACS_peak_1966	0.985	0.699822	101.32
MACS_peak_1967	chr20-57484370-57484770	8.33164	3.40967	0.0534783	chr20	57484475	57484975	MACS_peak_1967	0.7375	0.59	chr20	57484542	57484907	MACS_peak_1967	0.57	0.624658	84.99
MACS_peak_1967	chr20-57484366-57484766	21.3676	0.732841	0.746104	chr20	57484475	57484975	MACS_peak_1967	0.7275	0.582	chr20	57484542	57484907	MACS_peak_1967	0.56	0.613699	84.99
MACS_peak_1967	chr20-57484365-57484765	6.14076	-2.03591	0.191221	chr20	57484475	57484975	MACS_peak_1967	0.725	0.58	chr20	57484542	57484907	MACS_peak_1967	0.5575	0.610959	84.99
MACS_peak_1967	chr20-57484364-57484764	16.5763	-2.31476	0.0994549	chr20	57484475	57484975	MACS_peak_1967	0.7225	0.578	chr20	57484542	57484907	MACS_peak_1967	0.555	0.608219	84.99
MACS_peak_1969	chr20-57485736-57486136	3514.34	-1.47022	0.236289	chr20	57485707	57486207	MACS_peak_1969	1	0.8	chr20	57485674	57486240	MACS_peak_1969	1	0.706714	270.12
MACS_peak_1969	chr20-57485823-57486223	5.68194	-2.84766	0.0994549	chr20	57485707	57486207	MACS_peak_1969	0.96	0.768	chr20	57485674	57486240	MACS_peak_1969	1	0.706714	270.12
MACS_peak_1970	chr20-57639240-57639640	8.33164	3.40967	0.0534783	chr20	57639341	57639841	MACS_peak_1970	0.7475	0.598	chr20	57639448	57639734	MACS_peak_1970	0.48	0.671329	68.81
MACS_peak_1970	chr20-57639241-57639641	6.91477	1.18888	0.515772	chr20	57639341	57639841	MACS_peak_1970	0.75	0.6	chr20	57639448	57639734	MACS_peak_1970	0.4825	0.674825	68.81
MACS_peak_1970	chr20-57639290-57639690	16.8265	0.9899	0.571466	chr20	57639341	57639841	MACS_peak_1970	0.8725	0.698	chr20	57639448	57639734	MACS_peak_1970	0.605	0.846154	68.81
MACS_peak_1970	chr20-57639288-57639688	18.0347	0.808805	0.669633	chr20	57639341	57639841	MACS_peak_1970	0.8675	0.694	chr20	57639448	57639734	MACS_peak_1970	0.6	0.839161	68.81
MACS_peak_1970	chr20-57639289-57639689	9.38665	-0.0130128	0.994997	chr20	57639341	57639841	MACS_peak_1970	0.87	0.696	chr20	57639448	57639734	MACS_peak_1970	0.6025	0.842657	68.81
MACS_peak_1972	chr20-58455670-58456070	6.01504	3.20143	0.0534783	chr20	58455729	58456229	MACS_peak_1972	0.8525	0.682	chr20	58455797	58456161	MACS_peak_1972	0.6825	0.75	60.02
MACS_peak_1972	chr20-58455673-58456073	2317.99	0.687397	0.677677	chr20	58455729	58456229	MACS_peak_1972	0.86	0.688	chr20	58455797	58456161	MACS_peak_1972	0.69	0.758242	60.02
MACS_peak_1972	chr20-58455875-58456275	10.4209	0.485834	0.845293	chr20	58455729	58456229	MACS_peak_1972	0.885	0.708	chr20	58455797	58456161	MACS_peak_1972	0.715	0.785714	60.02
MACS_peak_1972	chr20-58455876-58456276	38.1615	-0.557927	0.788853	chr20	58455729	58456229	MACS_peak_1972	0.8825	0.706	chr20	58455797	58456161	MACS_peak_1972	0.7125	0.782967	60.02
MACS_peak_1972	chr20-58455616-58456016	9.76096	-0.57129	0.843889	chr20	58455729	58456229	MACS_peak_1972	0.7175	0.574	chr20	58455797	58456161	MACS_peak_1972	0.5475	0.601648	60.02
MACS_peak_1972	chr20-58455877-58456277	19.8782	-0.652954	0.728151	chr20	58455729	58456229	MACS_peak_1972	0.88	0.704	chr20	58455797	58456161	MACS_peak_1972	0.71	0.78022	60.02
MACS_peak_1972	chr20-58455617-58456017	8.04318	-0.988569	0.594706	chr20	58455729	58456229	MACS_peak_1972	0.72	0.576	chr20	58455797	58456161	MACS_peak_1972	0.55	0.604396	60.02
MACS_peak_1972	chr20-58455678-58456078	7464.11	-1.09698	0.395252	chr20	58455729	58456229	MACS_peak_1972	0.8725	0.698	chr20	58455797	58456161	MACS_peak_1972	0.7025	0.771978	60.02
MACS_peak_1972	chr20-58455665-58456065	7.10099	-1.25449	0.499767	chr20	58455729	58456229	MACS_peak_1972	0.84	0.672	chr20	58455797	58456161	MACS_peak_1972	0.67	0.736264	60.02
MACS_peak_1980	chr21-15295434-15295834	118.735	2.96528	0.11058							chr21	15295592	15295827	MACS_peak_1980	0.5875	1	55.3
MACS_peak_1983	chr21-27372005-27372405	5.91248	0.265211	0.945381	chr21	27372124	27372624	MACS_peak_1983	0.7025	0.562	chr21	27372243	27372505	MACS_peak_1983	0.405	0.618321	61.76
MACS_peak_1983	chr21-27372006-27372406	6.17026	-0.393249	0.872905	chr21	27372124	27372624	MACS_peak_1983	0.705	0.564	chr21	27372243	27372505	MACS_peak_1983	0.4075	0.622137	61.76
MACS_peak_1983	chr21-27372004-27372404	5.78144	-0.878051	0.642127	chr21	27372124	27372624	MACS_peak_1983	0.7	0.56	chr21	27372243	27372505	MACS_peak_1983	0.4025	0.614504	61.76
MACS_peak_1986	chr21-41650157-41650557	6.59491	2.38195	0.137988	chr21	41650113	41650613	MACS_peak_1986	1	0.8	chr21	41650126	41650599	MACS_peak_1986	1	0.845666	94.4
MACS_peak_1986	chr21-41650158-41650558	371.398	0.89656	0.682288	chr21	41650113	41650613	MACS_peak_1986	1	0.8	chr21	41650126	41650599	MACS_peak_1986	1	0.845666	94.4
MACS_peak_1986	chr21-41650156-41650556	18.3668	0.615138	0.792429	chr21	41650113	41650613	MACS_peak_1986	1	0.8	chr21	41650126	41650599	MACS_peak_1986	1	0.845666	94.4
MACS_peak_1986	chr21-41650254-41650654	10.1921	-3.54852	0.0534783	chr21	41650113	41650613	MACS_peak_1986	0.8975	0.718	chr21	41650126	41650599	MACS_peak_1986	0.8625	0.729387	94.4
MACS_peak_1988	chr21-43783387-43783787	9.61658	-1.71861	0.293896	chr21	43783220	43783720	MACS_peak_1988	0.8325	0.666	chr21	43783259	43783680	MACS_peak_1988	0.7325	0.695962	88.25
MACS_peak_1988	chr21-43783176-43783576	5.983	-2.02063	0.218557	chr21	43783220	43783720	MACS_peak_1988	0.89	0.712	chr21	43783259	43783680	MACS_peak_1988	0.7925	0.752969	88.25
MACS_peak_200	chr1-187377550-187377950	12.825	3.07472	0.0994549							chr1	187377313	187377922	MACS_peak_200	0.93	0.610837	125.54
MACS_peak_200	chr1-187377297-187377697	6.02577	3.06077	0.0854051							chr1	187377313	187377922	MACS_peak_200	0.96	0.630542	125.54
MACS_peak_200	chr1-187377544-187377944	10.3786	2.56675	0.135167							chr1	187377313	187377922	MACS_peak_200	0.945	0.62069	125.54
MACS_peak_200	chr1-187377552-187377952	10.5621	2.56113	0.0994549							chr1	187377313	187377922	MACS_peak_200	0.925	0.607553	125.54
MACS_peak_200	chr1-187377551-187377951	10.096	2.15215	0.211197							chr1	187377313	187377922	MACS_peak_200	0.9275	0.609195	125.54
MACS_peak_200	chr1-187377553-187377953	8.85143	1.06264	0.552314							chr1	187377313	187377922	MACS_peak_200	0.9225	0.605911	125.54
MACS_peak_200	chr1-187377554-187377954	15.408	0.666377	0.746088							chr1	187377313	187377922	MACS_peak_200	0.92	0.604269	125.54
MACS_peak_2013	chr22-31614969-31615369	31.6535	2.43893	0.0691593	chr22	31614879	31615379	MACS_peak_2013	1	0.8	chr22	31615004	31615254	MACS_peak_2013	0.625	1	73.94
MACS_peak_2017	chr22-34731439-34731839	7.93363	-3.51011	0.0348046	chr22	34731284	34731784	MACS_peak_2017	0.8625	0.69	chr22	34731438	34731630	MACS_peak_2017	0.4775	0.994792	61.73
MACS_peak_2017	chr22-34731489-34731889	12.6252	2.54648	0.137815	chr22	34731284	34731784	MACS_peak_2017	0.7375	0.59	chr22	34731438	34731630	MACS_peak_2017	0.3525	0.734375	61.73
MACS_peak_2017	chr22-34731429-34731829	7.76912	1.04948	0.576989	chr22	34731284	34731784	MACS_peak_2017	0.8875	0.71	chr22	34731438	34731630	MACS_peak_2017	0.48	1	61.73
MACS_peak_2017	chr22-34731440-34731840	28.2285	0.368912	0.902302	chr22	34731284	34731784	MACS_peak_2017	0.86	0.688	chr22	34731438	34731630	MACS_peak_2017	0.475	0.989583	61.73
MACS_peak_2017	chr22-34731427-34731827	14.8968	0.0902722	0.970463	chr22	34731284	34731784	MACS_peak_2017	0.8925	0.714	chr22	34731438	34731630	MACS_peak_2017	0.48	1	61.73
MACS_peak_2017	chr22-34731438-34731838	24.84	-0.212181	0.955502	chr22	34731284	34731784	MACS_peak_2017	0.865	0.692	chr22	34731438	34731630	MACS_peak_2017	0.48	1	61.73
MACS_peak_2017	chr22-34731441-34731841	271.05	-0.354709	0.869223	chr22	34731284	34731784	MACS_peak_2017	0.8575	0.686	chr22	34731438	34731630	MACS_peak_2017	0.4725	0.984375	61.73
MACS_peak_2017	chr22-34731430-34731830	6.99914	-0.365417	0.88235	chr22	34731284	34731784	MACS_peak_2017	0.885	0.708	chr22	34731438	34731630	MACS_peak_2017	0.48	1	61.73
MACS_peak_2017	chr22-34731431-34731831	17.1218	-1.52743	0.326379	chr22	34731284	34731784	MACS_peak_2017	0.8825	0.706	chr22	34731438	34731630	MACS_peak_2017	0.48	1	61.73
MACS_peak_2017	chr22-34731443-34731843	265.083	-1.69304	0.11446	chr22	34731284	34731784	MACS_peak_2017	0.8525	0.682	chr22	34731438	34731630	MACS_peak_2017	0.4675	0.973958	61.73
MACS_peak_2017	chr22-34731442-34731842	110.852	-1.84948	0.0981492	chr22	34731284	34731784	MACS_peak_2017	0.855	0.684	chr22	34731438	34731630	MACS_peak_2017	0.47	0.979167	61.73
MACS_peak_2017	chr22-34731491-34731891	6.61458	-1.91686	0.262265	chr22	34731284	34731784	MACS_peak_2017	0.7325	0.586	chr22	34731438	34731630	MACS_peak_2017	0.3475	0.723958	61.73
MACS_peak_202	chr1-187607851-187608251	273.142	6.59386	7.28351e-09	chr1	187607817	187608317	MACS_peak_202	1	0.8	chr1	187607931	187608202	MACS_peak_202	0.6775	1	62.7
MACS_peak_202	chr1-187608027-187608427	1219.24	6.30175	1.68092e-08	chr1	187607817	187608317	MACS_peak_202	0.725	0.58	chr1	187607931	187608202	MACS_peak_202	0.4375	0.645756	62.7
MACS_peak_202	chr1-187607833-187608233	1705.15	5.57585	7.35227e-06	chr1	187607817	187608317	MACS_peak_202	1	0.8	chr1	187607931	187608202	MACS_peak_202	0.6775	1	62.7
MACS_peak_202	chr1-187607768-187608168	71.276	5.3771	4.75311e-05	chr1	187607817	187608317	MACS_peak_202	0.8775	0.702	chr1	187607931	187608202	MACS_peak_202	0.5925	0.874539	62.7
MACS_peak_202	chr1-187607834-187608234	966.543	5.2678	3.34359e-05	chr1	187607817	187608317	MACS_peak_202	1	0.8	chr1	187607931	187608202	MACS_peak_202	0.6775	1	62.7
MACS_peak_202	chr1-187607832-187608232	414.252	4.92527	1.57516e-06	chr1	187607817	187608317	MACS_peak_202	1	0.8	chr1	187607931	187608202	MACS_peak_202	0.6775	1	62.7
MACS_peak_202	chr1-187607831-187608231	692.189	4.74517	2.13085e-07	chr1	187607817	187608317	MACS_peak_202	1	0.8	chr1	187607931	187608202	MACS_peak_202	0.6775	1	62.7
MACS_peak_202	chr1-187607923-187608323	30.324	4.52621	0.00495397	chr1	187607817	187608317	MACS_peak_202	0.985	0.788	chr1	187607931	187608202	MACS_peak_202	0.6775	1	62.7
MACS_peak_202	chr1-187607926-187608326	646.272	4.49873	0.000124759	chr1	187607817	187608317	MACS_peak_202	0.9775	0.782	chr1	187607931	187608202	MACS_peak_202	0.6775	1	62.7
MACS_peak_202	chr1-187607998-187608398	357.57	4.35399	0.0112852	chr1	187607817	187608317	MACS_peak_202	0.7975	0.638	chr1	187607931	187608202	MACS_peak_202	0.51	0.752768	62.7
MACS_peak_202	chr1-187608017-187608417	26.3822	3.88458	0.0124934	chr1	187607817	187608317	MACS_peak_202	0.75	0.6	chr1	187607931	187608202	MACS_peak_202	0.4625	0.682657	62.7
MACS_peak_202	chr1-187607925-187608325	638.846	3.85026	0.00124836	chr1	187607817	187608317	MACS_peak_202	0.98	0.784	chr1	187607931	187608202	MACS_peak_202	0.6775	1	62.7
MACS_peak_202	chr1-187607927-187608327	136.991	3.4754	0.0219443	chr1	187607817	187608317	MACS_peak_202	0.975	0.78	chr1	187607931	187608202	MACS_peak_202	0.6775	1	62.7
MACS_peak_202	chr1-187607999-187608399	332.773	3.21568	0.00969974	chr1	187607817	187608317	MACS_peak_202	0.795	0.636	chr1	187607931	187608202	MACS_peak_202	0.5075	0.749077	62.7
MACS_peak_202	chr1-187607982-187608382	202.176	3.17434	0.0153938	chr1	187607817	187608317	MACS_peak_202	0.8375	0.67	chr1	187607931	187608202	MACS_peak_202	0.55	0.811808	62.7
MACS_peak_202	chr1-187607924-187608324	838.874	3.16211	0.00368387	chr1	187607817	187608317	MACS_peak_202	0.9825	0.786	chr1	187607931	187608202	MACS_peak_202	0.6775	1	62.7
MACS_peak_202	chr1-187607770-187608170	46.1662	2.90101	0.0406278	chr1	187607817	187608317	MACS_peak_202	0.8825	0.706	chr1	187607931	187608202	MACS_peak_202	0.5975	0.881919	62.7
MACS_peak_202	chr1-187608015-187608415	46.6631	2.66397	0.0445242	chr1	187607817	187608317	MACS_peak_202	0.755	0.604	chr1	187607931	187608202	MACS_peak_202	0.4675	0.690037	62.7
MACS_peak_202	chr1-187607922-187608322	60.6319	2.94275	0.0526435	chr1	187607817	187608317	MACS_peak_202	0.9875	0.79	chr1	187607931	187608202	MACS_peak_202	0.6775	1	62.7
MACS_peak_202	chr1-187608000-187608400	259.404	2.42975	0.0534783	chr1	187607817	187608317	MACS_peak_202	0.7925	0.634	chr1	187607931	187608202	MACS_peak_202	0.505	0.745387	62.7
MACS_peak_202	chr1-187607983-187608383	295.011	1.71584	0.204509	chr1	187607817	187608317	MACS_peak_202	0.835	0.668	chr1	187607931	187608202	MACS_peak_202	0.5475	0.808118	62.7
MACS_peak_202	chr1-187607984-187608384	617.582	1.61004	0.236164	chr1	187607817	187608317	MACS_peak_202	0.8325	0.666	chr1	187607931	187608202	MACS_peak_202	0.545	0.804428	62.7
MACS_peak_202	chr1-187607769-187608169	13.7779	1.52796	0.359325	chr1	187607817	187608317	MACS_peak_202	0.88	0.704	chr1	187607931	187608202	MACS_peak_202	0.595	0.878229	62.7
MACS_peak_202	chr1-187608001-187608401	827.696	1.42628	0.323188	chr1	187607817	187608317	MACS_peak_202	0.79	0.632	chr1	187607931	187608202	MACS_peak_202	0.5025	0.741697	62.7
MACS_peak_202	chr1-187608016-187608416	117.857	1.05699	0.618254	chr1	187607817	187608317	MACS_peak_202	0.7525	0.602	chr1	187607931	187608202	MACS_peak_202	0.465	0.686347	62.7
MACS_peak_202	chr1-187608029-187608429	1453.02	0.943937	0.592371	chr1	187607817	187608317	MACS_peak_202	0.72	0.576	chr1	187607931	187608202	MACS_peak_202	0.4325	0.638376	62.7
MACS_peak_2020	chr22-36919016-36919416	8.53486	-0.260232	0.956932	chr22	36919048	36919548	MACS_peak_2020	0.92	0.736	chr22	36919211	36919384	MACS_peak_2020	0.4325	1	101.37
MACS_peak_2029	chr22-45468897-45469297	8.2391	2.92865	0.0994549	chr22	45469000	45469500	MACS_peak_2029	0.7425	0.594	chr22	45469168	45469331	MACS_peak_2029	0.3225	0.791411	76.81
MACS_peak_2029	chr22-45468898-45469298	6.03007	2.43641	0.155509	chr22	45469000	45469500	MACS_peak_2029	0.745	0.596	chr22	45469168	45469331	MACS_peak_2029	0.325	0.797546	76.81
MACS_peak_2029	chr22-45468899-45469299	7.93212	0.0936545	0.970463	chr22	45469000	45469500	MACS_peak_2029	0.7475	0.598	chr22	45469168	45469331	MACS_peak_2029	0.3275	0.803681	76.81
MACS_peak_2036	chr3-152906-153306	40.9742	5.13723	0.000223428	chr3	152715	153215	MACS_peak_2036	0.7725	0.618	chr3	152680	153249	MACS_peak_2036	0.8575	0.602812	260.32
MACS_peak_2036	chr3-152900-153300	116.083	3.29251	0.015256	chr3	152715	153215	MACS_peak_2036	0.7875	0.63	chr3	152680	153249	MACS_peak_2036	0.8725	0.613357	260.32
MACS_peak_2036	chr3-152903-153303	8.33164	3.40967	0.0534783	chr3	152715	153215	MACS_peak_2036	0.78	0.624	chr3	152680	153249	MACS_peak_2036	0.865	0.608084	260.32
MACS_peak_2036	chr3-152901-153301	80.3491	2.67135	0.0931118	chr3	152715	153215	MACS_peak_2036	0.785	0.628	chr3	152680	153249	MACS_peak_2036	0.87	0.611599	260.32
MACS_peak_2036	chr3-152666-153066	19.5899	2.48342	0.153392	chr3	152715	153215	MACS_peak_2036	0.8775	0.702	chr3	152680	153249	MACS_peak_2036	0.965	0.678383	260.32
MACS_peak_2036	chr3-152738-153138	8.05208	2.47832	0.117445	chr3	152715	153215	MACS_peak_2036	1	0.8	chr3	152680	153249	MACS_peak_2036	1	0.702988	260.32
MACS_peak_2036	chr3-152899-153299	139.285	2.46522	0.0994549	chr3	152715	153215	MACS_peak_2036	0.79	0.632	chr3	152680	153249	MACS_peak_2036	0.875	0.615114	260.32
MACS_peak_2036	chr3-152898-153298	116.16	2.03297	0.1289	chr3	152715	153215	MACS_peak_2036	0.7925	0.634	chr3	152680	153249	MACS_peak_2036	0.8775	0.616872	260.32
MACS_peak_2036	chr3-152640-153040	15.8702	1.60061	0.356151	chr3	152715	153215	MACS_peak_2036	0.8125	0.65	chr3	152680	153249	MACS_peak_2036	0.9	0.632689	260.32
MACS_peak_2036	chr3-152884-153284	25.7356	0.988103	0.613398	chr3	152715	153215	MACS_peak_2036	0.8275	0.662	chr3	152680	153249	MACS_peak_2036	0.9125	0.641476	260.32
MACS_peak_2036	chr3-152668-153068	12.1307	0.80074	0.667076	chr3	152715	153215	MACS_peak_2036	0.8825	0.706	chr3	152680	153249	MACS_peak_2036	0.97	0.681898	260.32
MACS_peak_2036	chr3-152879-153279	5.8378	0.563606	0.813317	chr3	152715	153215	MACS_peak_2036	0.84	0.672	chr3	152680	153249	MACS_peak_2036	0.925	0.650264	260.32
MACS_peak_2036	chr3-152740-153140	11.7843	0.552926	0.80489	chr3	152715	153215	MACS_peak_2036	1	0.8	chr3	152680	153249	MACS_peak_2036	1	0.702988	260.32
MACS_peak_2036	chr3-152877-153277	12.8316	0.499365	0.866067	chr3	152715	153215	MACS_peak_2036	0.845	0.676	chr3	152680	153249	MACS_peak_2036	0.93	0.653779	260.32
MACS_peak_2036	chr3-152638-153038	19.6523	0.27895	0.929189	chr3	152715	153215	MACS_peak_2036	0.8075	0.646	chr3	152680	153249	MACS_peak_2036	0.895	0.629174	260.32
MACS_peak_2036	chr3-152876-153276	5.68544	0.0955583	0.970463	chr3	152715	153215	MACS_peak_2036	0.8475	0.678	chr3	152680	153249	MACS_peak_2036	0.9325	0.655536	260.32
MACS_peak_2036	chr3-152745-153145	6.28715	-0.494666	0.848293	chr3	152715	153215	MACS_peak_2036	1	0.8	chr3	152680	153249	MACS_peak_2036	1	0.702988	260.32
MACS_peak_2036	chr3-152639-153039	14.2483	-0.947811	0.679854	chr3	152715	153215	MACS_peak_2036	0.81	0.648	chr3	152680	153249	MACS_peak_2036	0.8975	0.630931	260.32
MACS_peak_2036	chr3-152878-153278	11.4453	-2.02094	0.28905	chr3	152715	153215	MACS_peak_2036	0.8425	0.674	chr3	152680	153249	MACS_peak_2036	0.9275	0.652021	260.32
MACS_peak_2038	chr3-940171-940571	9.79369	1.41274	0.449861	chr3	940122	940622	MACS_peak_2038	1	0.8	chr3	940270	940473	MACS_peak_2038	0.5075	1	59.94
MACS_peak_2038	chr3-940172-940572	12.8215	0.508219	0.863467	chr3	940122	940622	MACS_peak_2038	1	0.8	chr3	940270	940473	MACS_peak_2038	0.5075	1	59.94
MACS_peak_2038	chr3-940173-940573	36.5935	-0.651372	0.745461	chr3	940122	940622	MACS_peak_2038	1	0.8	chr3	940270	940473	MACS_peak_2038	0.5075	1	59.94
MACS_peak_2038	chr3-940083-940483	144.169	-0.76724	0.607733	chr3	940122	940622	MACS_peak_2038	0.9025	0.722	chr3	940270	940473	MACS_peak_2038	0.5075	1	59.94
MACS_peak_2038	chr3-940082-940482	26.26	-1.72582	0.30176	chr3	940122	940622	MACS_peak_2038	0.9	0.72	chr3	940270	940473	MACS_peak_2038	0.5075	1	59.94
MACS_peak_2039	chr3-1110860-1111260	748.85	1.71356	0.374652	chr3	1110732	1111232	MACS_peak_2039	0.93	0.744	chr3	1110766	1111198	MACS_peak_2039	0.845	0.782407	175.28
MACS_peak_2039	chr3-1110862-1111262	12.6816	-0.548887	0.85658	chr3	1110732	1111232	MACS_peak_2039	0.925	0.74	chr3	1110766	1111198	MACS_peak_2039	0.84	0.777778	175.28
MACS_peak_2040	chr3-1113772-1114172	8.08429	3.05558	0.0724533	chr3	1113802	1114302	MACS_peak_2040	0.925	0.74	chr3	1113896	1114208	MACS_peak_2040	0.69	0.884615	77.82
MACS_peak_2040	chr3-1113695-1114095	15.3617	2.68521	0.0994549	chr3	1113802	1114302	MACS_peak_2040	0.7325	0.586	chr3	1113896	1114208	MACS_peak_2040	0.4975	0.637821	77.82
MACS_peak_2040	chr3-1113773-1114173	7.00854	2.53676	0.165343	chr3	1113802	1114302	MACS_peak_2040	0.9275	0.742	chr3	1113896	1114208	MACS_peak_2040	0.6925	0.887821	77.82
MACS_peak_2040	chr3-1113693-1114093	23.4117	0.653132	0.782201	chr3	1113802	1114302	MACS_peak_2040	0.7275	0.582	chr3	1113896	1114208	MACS_peak_2040	0.4925	0.63141	77.82
MACS_peak_2040	chr3-1113774-1114174	6.26996	0.403434	0.868272	chr3	1113802	1114302	MACS_peak_2040	0.93	0.744	chr3	1113896	1114208	MACS_peak_2040	0.695	0.891026	77.82
MACS_peak_2040	chr3-1113694-1114094	14.7157	0.130439	0.970463	chr3	1113802	1114302	MACS_peak_2040	0.73	0.584	chr3	1113896	1114208	MACS_peak_2040	0.495	0.634615	77.82
MACS_peak_2040	chr3-1113699-1114099	21.825	-0.236188	0.970463	chr3	1113802	1114302	MACS_peak_2040	0.7425	0.594	chr3	1113896	1114208	MACS_peak_2040	0.5075	0.650641	77.82
MACS_peak_2041	chr3-1114708-1115108	5.58377	0.779109	0.706861	chr3	1114772	1115272	MACS_peak_2041	0.84	0.672	chr3	1114880	1115164	MACS_peak_2041	0.57	0.802817	60.75
MACS_peak_2041	chr3-1114823-1115223	54.9112	-0.703892	0.7052	chr3	1114772	1115272	MACS_peak_2041	1	0.8	chr3	1114880	1115164	MACS_peak_2041	0.71	1	60.75
MACS_peak_2046	chr3-3326527-3326927	6.52542	-3.03615	0.0921739	chr3	3326331	3326831	MACS_peak_2046	0.76	0.608	chr3	3326493	3326668	MACS_peak_2046	0.3525	0.805714	64.72
MACS_peak_2047	chr3-3601406-3601806	24.3987	4.10505	0.00593398	chr3	3601352	3601852	MACS_peak_2047	1	0.8	chr3	3601313	3601890	MACS_peak_2047	1	0.693241	117.89
MACS_peak_2047	chr3-3601516-3601916	9.38506	2.93119	0.0908374	chr3	3601352	3601852	MACS_peak_2047	0.84	0.672	chr3	3601313	3601890	MACS_peak_2047	0.935	0.64818	117.89
MACS_peak_2047	chr3-3601397-3601797	12.4745	1.95396	0.248554	chr3	3601352	3601852	MACS_peak_2047	1	0.8	chr3	3601313	3601890	MACS_peak_2047	1	0.693241	117.89
MACS_peak_2047	chr3-3601395-3601795	15.689	1.27175	0.483442	chr3	3601352	3601852	MACS_peak_2047	1	0.8	chr3	3601313	3601890	MACS_peak_2047	1	0.693241	117.89
MACS_peak_2047	chr3-3601396-3601796	8.04635	0.438355	0.870944	chr3	3601352	3601852	MACS_peak_2047	1	0.8	chr3	3601313	3601890	MACS_peak_2047	1	0.693241	117.89
MACS_peak_2047	chr3-3601405-3601805	7.93212	0.0936545	0.970463	chr3	3601352	3601852	MACS_peak_2047	1	0.8	chr3	3601313	3601890	MACS_peak_2047	1	0.693241	117.89
MACS_peak_2047	chr3-3601518-3601918	10.6214	-0.643436	0.801088	chr3	3601352	3601852	MACS_peak_2047	0.835	0.668	chr3	3601313	3601890	MACS_peak_2047	0.93	0.644714	117.89
MACS_peak_2048	chr3-3606380-3606780	6.3901	-1.17677	0.509982	chr3	3606218	3606718	MACS_peak_2048	0.845	0.676	chr3	3606391	3606544	MACS_peak_2048	0.3825	1	70.16
MACS_peak_2048	chr3-3606379-3606779	6.85896	-1.99394	0.223905	chr3	3606218	3606718	MACS_peak_2048	0.8475	0.678	chr3	3606391	3606544	MACS_peak_2048	0.3825	1	70.16
MACS_peak_205	chr1-188958198-188958598	10.0339	-0.696954	0.746926	chr1	188958007	188958507	MACS_peak_205	0.7725	0.618	chr1	188958176	188958337	MACS_peak_205	0.3475	0.863354	86.1
MACS_peak_2050	chr3-3877290-3877690	7923.16	1.53212	0.0581395	chr3	3877084	3877584	MACS_peak_2050	0.735	0.588	chr3	3877235	3877433	MACS_peak_2050	0.3575	0.722222	60.74
MACS_peak_2050	chr3-3876957-3877357	5.63533	1.35241	0.482468	chr3	3877084	3877584	MACS_peak_2050	0.6825	0.546	chr3	3877235	3877433	MACS_peak_2050	0.305	0.616162	60.74
MACS_peak_2050	chr3-3876955-3877355	6.11064	-0.822828	0.680427	chr3	3877084	3877584	MACS_peak_2050	0.6775	0.542	chr3	3877235	3877433	MACS_peak_2050	0.3	0.606061	60.74
MACS_peak_2050	chr3-3876965-3877365	5.68194	-2.84766	0.0994549	chr3	3877084	3877584	MACS_peak_2050	0.7025	0.562	chr3	3877235	3877433	MACS_peak_2050	0.325	0.656566	60.74
MACS_peak_2052	chr3-5041539-5041939	8.33164	3.40967	0.0534783	chr3	5041578	5042078	MACS_peak_2052	0.9025	0.722	chr3	5041679	5041977	MACS_peak_2052	0.65	0.872483	66.52
MACS_peak_2052	chr3-5041610-5042010	5.60743	-0.403953	0.879333	chr3	5041578	5042078	MACS_peak_2052	1	0.8	chr3	5041679	5041977	MACS_peak_2052	0.745	1	66.52
MACS_peak_2053	chr3-6161611-6162011	19.8302	0.410008	0.892629	chr3	6161506	6162006	MACS_peak_2053	0.9875	0.79	chr3	6161674	6161837	MACS_peak_2053	0.4075	1	77.82
MACS_peak_2053	chr3-6161609-6162009	17.6153	0.349367	0.887546	chr3	6161506	6162006	MACS_peak_2053	0.9925	0.794	chr3	6161674	6161837	MACS_peak_2053	0.4075	1	77.82
MACS_peak_2053	chr3-6161515-6161915	7.14018	-0.0834543	0.970463	chr3	6161506	6162006	MACS_peak_2053	1	0.8	chr3	6161674	6161837	MACS_peak_2053	0.4075	1	77.82
MACS_peak_2053	chr3-6161610-6162010	17.3316	-0.255418	0.963221	chr3	6161506	6162006	MACS_peak_2053	0.99	0.792	chr3	6161674	6161837	MACS_peak_2053	0.4075	1	77.82
MACS_peak_2053	chr3-6161481-6161881	5.83051	-0.388128	0.90197	chr3	6161506	6162006	MACS_peak_2053	0.9375	0.75	chr3	6161674	6161837	MACS_peak_2053	0.4075	1	77.82
MACS_peak_2053	chr3-6161514-6161914	6.90691	-0.887056	0.681547	chr3	6161506	6162006	MACS_peak_2053	1	0.8	chr3	6161674	6161837	MACS_peak_2053	0.4075	1	77.82
MACS_peak_2053	chr3-6161656-6162056	6.95081	-1.18164	0.542041	chr3	6161506	6162006	MACS_peak_2053	0.875	0.7	chr3	6161674	6161837	MACS_peak_2053	0.4075	1	77.82
MACS_peak_2053	chr3-6161482-6161882	5.68194	-2.84766	0.0994549	chr3	6161506	6162006	MACS_peak_2053	0.94	0.752	chr3	6161674	6161837	MACS_peak_2053	0.4075	1	77.82
MACS_peak_2053	chr3-6161657-6162057	5.68194	-2.84766	0.0994549	chr3	6161506	6162006	MACS_peak_2053	0.8725	0.698	chr3	6161674	6161837	MACS_peak_2053	0.4075	1	77.82
MACS_peak_2054	chr3-6174263-6174663	5.54817	2.33885	0.147332	chr3	6174395	6174895	MACS_peak_2054	0.67	0.536	chr3	6174576	6174713	MACS_peak_2054	0.2175	0.635036	71.93
MACS_peak_2054	chr3-6174265-6174665	7.31578	0.19688	0.970463	chr3	6174395	6174895	MACS_peak_2054	0.675	0.54	chr3	6174576	6174713	MACS_peak_2054	0.2225	0.649635	71.93
MACS_peak_2054	chr3-6174262-6174662	5.68544	0.0955583	0.970463	chr3	6174395	6174895	MACS_peak_2054	0.6675	0.534	chr3	6174576	6174713	MACS_peak_2054	0.215	0.627737	71.93
MACS_peak_2054	chr3-6174595-6174995	9.7936	-2.28814	0.164711	chr3	6174395	6174895	MACS_peak_2054	0.75	0.6	chr3	6174576	6174713	MACS_peak_2054	0.295	0.861314	71.93
MACS_peak_2054	chr3-6174548-6174948	11.0777	-2.65782	0.0854051	chr3	6174395	6174895	MACS_peak_2054	0.8675	0.694	chr3	6174576	6174713	MACS_peak_2054	0.3425	1	71.93
MACS_peak_2054	chr3-6174547-6174947	10.1921	-3.54852	0.0534783	chr3	6174395	6174895	MACS_peak_2054	0.87	0.696	chr3	6174576	6174713	MACS_peak_2054	0.3425	1	71.93
MACS_peak_2067	chr3-14219915-14220315	8.33164	3.40967	0.0534783	chr3	14219739	14220339	MACS_peak_2067	1	0.666667	chr3	14219710	14220368	MACS_peak_2067	1	0.607903	197.56
MACS_peak_2068	chr3-14526298-14526698	7.00854	2.53676	0.165343	chr3	14526224	14526724	MACS_peak_2068	1	0.8	chr3	14526358	14526589	MACS_peak_2068	0.5775	1	67.08
MACS_peak_2068	chr3-14526296-14526696	7.90065	-1.031	0.582311	chr3	14526224	14526724	MACS_peak_2068	1	0.8	chr3	14526358	14526589	MACS_peak_2068	0.5775	1	67.08
MACS_peak_2068	chr3-14526336-14526736	10.9937	-2.20322	0.164824	chr3	14526224	14526724	MACS_peak_2068	0.97	0.776	chr3	14526358	14526589	MACS_peak_2068	0.5775	1	67.08
MACS_peak_2069	chr3-14530122-14530522	31.1079	2.18094	0.208736	chr3	14530087	14530587	MACS_peak_2069	1	0.8	chr3	14530133	14530540	MACS_peak_2069	0.9725	0.955774	104.52
MACS_peak_2069	chr3-14530120-14530520	79.582	0.870912	0.550629	chr3	14530087	14530587	MACS_peak_2069	1	0.8	chr3	14530133	14530540	MACS_peak_2069	0.9675	0.95086	104.52
MACS_peak_2069	chr3-14530262-14530662	7.24524	0.422993	0.89076	chr3	14530087	14530587	MACS_peak_2069	0.8125	0.65	chr3	14530133	14530540	MACS_peak_2069	0.695	0.683047	104.52
MACS_peak_2084	chr3-22785397-22785797	5.68544	0.0955583	0.970463	chr3	22785232	22785732	MACS_peak_2084	0.8375	0.67	chr3	22785336	22785627	MACS_peak_2084	0.575	0.790378	78.2
MACS_peak_2084	chr3-22785399-22785799	6.85342	-0.700835	0.731701	chr3	22785232	22785732	MACS_peak_2084	0.8325	0.666	chr3	22785336	22785627	MACS_peak_2084	0.57	0.783505	78.2
MACS_peak_2084	chr3-22785282-22785682	5.8858	-0.994913	0.612974	chr3	22785232	22785732	MACS_peak_2084	1	0.8	chr3	22785336	22785627	MACS_peak_2084	0.7275	1	78.2
MACS_peak_2088	chr3-24908177-24908577	8.33164	3.40967	0.0534783	chr3	24908002	24908502	MACS_peak_2088	0.8125	0.65	chr3	24908112	24908391	MACS_peak_2088	0.535	0.767025	64.76
MACS_peak_2088	chr3-24908022-24908422	41.6796	0.670632	0.787345	chr3	24908002	24908502	MACS_peak_2088	1	0.8	chr3	24908112	24908391	MACS_peak_2088	0.6975	1	64.76
MACS_peak_2088	chr3-24908020-24908420	27.9253	-0.225756	0.936919	chr3	24908002	24908502	MACS_peak_2088	1	0.8	chr3	24908112	24908391	MACS_peak_2088	0.6975	1	64.76
MACS_peak_210	chr1-190549376-190549776	6.10099	-0.929673	0.635656	chr1	190549382	190549882	MACS_peak_210	0.985	0.788	chr1	190549514	190549750	MACS_peak_210	0.59	1	67.56
MACS_peak_2101	chr3-32448515-32448915	16.018	2.94435	0.0539792	chr3	32448581	32449081	MACS_peak_2101	0.835	0.668	chr3	32448606	32449055	MACS_peak_2101	0.7725	0.688196	91.13
MACS_peak_2101	chr3-32448644-32449044	33.5475	2.04734	0.210369	chr3	32448581	32449081	MACS_peak_2101	1	0.8	chr3	32448606	32449055	MACS_peak_2101	1	0.890869	91.13
MACS_peak_2101	chr3-32448645-32449045	36.0242	1.91984	0.23976	chr3	32448581	32449081	MACS_peak_2101	1	0.8	chr3	32448606	32449055	MACS_peak_2101	1	0.890869	91.13
MACS_peak_2101	chr3-32448513-32448913	43.4594	1.80756	0.20191	chr3	32448581	32449081	MACS_peak_2101	0.83	0.664	chr3	32448606	32449055	MACS_peak_2101	0.7675	0.683742	91.13
MACS_peak_2101	chr3-32448646-32449046	33.0347	1.40451	0.335422	chr3	32448581	32449081	MACS_peak_2101	1	0.8	chr3	32448606	32449055	MACS_peak_2101	1	0.890869	91.13
MACS_peak_2101	chr3-32448514-32448914	29.1154	1.30285	0.482425	chr3	32448581	32449081	MACS_peak_2101	0.8325	0.666	chr3	32448606	32449055	MACS_peak_2101	0.77	0.685969	91.13
MACS_peak_2101	chr3-32448510-32448910	8.60815	-0.684141	0.746926	chr3	32448581	32449081	MACS_peak_2101	0.8225	0.658	chr3	32448606	32449055	MACS_peak_2101	0.76	0.67706	91.13
MACS_peak_2101	chr3-32448508-32448908	5.68194	-2.84766	0.0994549	chr3	32448581	32449081	MACS_peak_2101	0.8175	0.654	chr3	32448606	32449055	MACS_peak_2101	0.755	0.672606	91.13
MACS_peak_2102	chr3-33110062-33110462	4744.39	0.00341117	0.99787	chr3	33110114	33110614	MACS_peak_2102	0.87	0.696	chr3	33110233	33110495	MACS_peak_2102	0.5725	0.874046	63.36
MACS_peak_2107	chr3-36974295-36974695	19.7546	3.6918	0.0534783	chr3	36974235	36974735	MACS_peak_2107	1	0.8	chr3	36974292	36974678	MACS_peak_2107	0.9575	0.992228	135.95
MACS_peak_2107	chr3-36974297-36974697	19.4891	3.49315	0.0534783	chr3	36974235	36974735	MACS_peak_2107	1	0.8	chr3	36974292	36974678	MACS_peak_2107	0.9525	0.987047	135.95
MACS_peak_2107	chr3-36974428-36974828	5.9289	3.11836	0.0631188	chr3	36974235	36974735	MACS_peak_2107	0.7675	0.614	chr3	36974292	36974678	MACS_peak_2107	0.625	0.647668	135.95
MACS_peak_2107	chr3-36974296-36974696	22.5374	2.66878	0.104485	chr3	36974235	36974735	MACS_peak_2107	1	0.8	chr3	36974292	36974678	MACS_peak_2107	0.955	0.989637	135.95
MACS_peak_2107	chr3-36974298-36974698	8.61756	2.17765	0.206983	chr3	36974235	36974735	MACS_peak_2107	1	0.8	chr3	36974292	36974678	MACS_peak_2107	0.95	0.984456	135.95
MACS_peak_2107	chr3-36974299-36974699	18.9786	2.12243	0.215175	chr3	36974235	36974735	MACS_peak_2107	1	0.8	chr3	36974292	36974678	MACS_peak_2107	0.9475	0.981865	135.95
MACS_peak_2107	chr3-36974426-36974826	7.65252	0.488983	0.837598	chr3	36974235	36974735	MACS_peak_2107	0.7725	0.618	chr3	36974292	36974678	MACS_peak_2107	0.63	0.65285	135.95
MACS_peak_2109	chr3-42864805-42865205	20.5686	3.95913	0.016401	chr3	42864857	42865357	MACS_peak_2109	0.87	0.696	chr3	42864847	42865367	MACS_peak_2109	0.895	0.688462	148.14
MACS_peak_2109	chr3-42864799-42865199	15.0717	2.99858	0.0994549	chr3	42864857	42865357	MACS_peak_2109	0.855	0.684	chr3	42864847	42865367	MACS_peak_2109	0.88	0.676923	148.14
MACS_peak_2109	chr3-42864806-42865206	31.2521	2.54323	0.0994549	chr3	42864857	42865357	MACS_peak_2109	0.8725	0.698	chr3	42864847	42865367	MACS_peak_2109	0.8975	0.690385	148.14
MACS_peak_2109	chr3-42864789-42865189	33.0112	2.27507	0.106966	chr3	42864857	42865357	MACS_peak_2109	0.83	0.664	chr3	42864847	42865367	MACS_peak_2109	0.855	0.657692	148.14
MACS_peak_2109	chr3-42864787-42865187	45.8055	2.14931	0.0994549	chr3	42864857	42865357	MACS_peak_2109	0.825	0.66	chr3	42864847	42865367	MACS_peak_2109	0.85	0.653846	148.14
MACS_peak_2109	chr3-42864807-42865207	34.542	1.81169	0.20825	chr3	42864857	42865357	MACS_peak_2109	0.875	0.7	chr3	42864847	42865367	MACS_peak_2109	0.9	0.692308	148.14
MACS_peak_2109	chr3-42864788-42865188	17.2338	1.77404	0.26531	chr3	42864857	42865357	MACS_peak_2109	0.8275	0.662	chr3	42864847	42865367	MACS_peak_2109	0.8525	0.655769	148.14
MACS_peak_2109	chr3-42864790-42865190	27.911	1.61351	0.355709	chr3	42864857	42865357	MACS_peak_2109	0.8325	0.666	chr3	42864847	42865367	MACS_peak_2109	0.8575	0.659615	148.14
MACS_peak_2109	chr3-42864808-42865208	33.9397	1.52574	0.341507	chr3	42864857	42865357	MACS_peak_2109	0.8775	0.702	chr3	42864847	42865367	MACS_peak_2109	0.9025	0.694231	148.14
MACS_peak_2109	chr3-42864896-42865296	6.18134	1.05947	0.591839	chr3	42864857	42865357	MACS_peak_2109	1	0.8	chr3	42864847	42865367	MACS_peak_2109	1	0.769231	148.14
MACS_peak_2115	chr3-49397149-49397549	10.1475	-2.11047	0.249553	chr3	49397199	49397699	MACS_peak_2115	0.875	0.7	chr3	49397311	49397586	MACS_peak_2115	0.595	0.865455	70.15
MACS_peak_2115	chr3-49397168-49397568	5.68194	-2.84766	0.0994549	chr3	49397199	49397699	MACS_peak_2115	0.9225	0.738	chr3	49397311	49397586	MACS_peak_2115	0.6425	0.934545	70.15
MACS_peak_2118	chr3-56817838-56818238	698.81	3.44903	0.000686327	chr3	56817886	56818386	MACS_peak_2118	0.88	0.704	chr3	56817976	56818295	MACS_peak_2118	0.655	0.821317	127.79
MACS_peak_2118	chr3-56817837-56818237	138.385	2.87721	0.00819785	chr3	56817886	56818386	MACS_peak_2118	0.8775	0.702	chr3	56817976	56818295	MACS_peak_2118	0.6525	0.818182	127.79
MACS_peak_2118	chr3-56817836-56818236	9.84962	0.387896	0.871483	chr3	56817886	56818386	MACS_peak_2118	0.875	0.7	chr3	56817976	56818295	MACS_peak_2118	0.65	0.815047	127.79
MACS_peak_2119	chr3-63020788-63021188	34.5704	2.40997	0.156625	chr3	63020671	63021171	MACS_peak_2119	0.9575	0.766	chr3	63020720	63021121	MACS_peak_2119	0.8325	0.830424	71
MACS_peak_2119	chr3-63020753-63021153	6.86503	0.824061	0.667283	chr3	63020671	63021171	MACS_peak_2119	1	0.8	chr3	63020720	63021121	MACS_peak_2119	0.92	0.917706	71
MACS_peak_2119	chr3-63020650-63021050	7.7249	0.80775	0.693429	chr3	63020671	63021171	MACS_peak_2119	0.9475	0.758	chr3	63020720	63021121	MACS_peak_2119	0.825	0.822943	71
MACS_peak_2119	chr3-63020839-63021239	7.18994	0.546219	0.830378	chr3	63020671	63021171	MACS_peak_2119	0.83	0.664	chr3	63020720	63021121	MACS_peak_2119	0.705	0.703242	71
MACS_peak_2119	chr3-63020651-63021051	12.8215	0.508219	0.863467	chr3	63020671	63021171	MACS_peak_2119	0.95	0.76	chr3	63020720	63021121	MACS_peak_2119	0.8275	0.825436	71
MACS_peak_2119	chr3-63020755-63021155	7.93212	0.0936545	0.970463	chr3	63020671	63021171	MACS_peak_2119	1	0.8	chr3	63020720	63021121	MACS_peak_2119	0.915	0.912718	71
MACS_peak_2119	chr3-63020572-63020972	38.0706	-0.199119	0.970463	chr3	63020671	63021171	MACS_peak_2119	0.7525	0.602	chr3	63020720	63021121	MACS_peak_2119	0.63	0.628429	71
MACS_peak_2119	chr3-63020571-63020971	67.0763	-0.260664	0.953269	chr3	63020671	63021171	MACS_peak_2119	0.75	0.6	chr3	63020720	63021121	MACS_peak_2119	0.6275	0.625935	71
MACS_peak_2119	chr3-63020840-63021240	31.1653	-0.475122	0.866496	chr3	63020671	63021171	MACS_peak_2119	0.8275	0.662	chr3	63020720	63021121	MACS_peak_2119	0.7025	0.700748	71
MACS_peak_2119	chr3-63020841-63021241	9.03744	-0.743391	0.712185	chr3	63020671	63021171	MACS_peak_2119	0.825	0.66	chr3	63020720	63021121	MACS_peak_2119	0.7	0.698254	71
MACS_peak_2119	chr3-63020574-63020974	40.6775	-0.857653	0.58592	chr3	63020671	63021171	MACS_peak_2119	0.7575	0.606	chr3	63020720	63021121	MACS_peak_2119	0.635	0.633416	71
MACS_peak_2119	chr3-63020648-63021048	16.5717	-0.999448	0.579408	chr3	63020671	63021171	MACS_peak_2119	0.9425	0.754	chr3	63020720	63021121	MACS_peak_2119	0.82	0.817955	71
MACS_peak_2119	chr3-63020795-63021195	12.5502	-1.04132	0.562649	chr3	63020671	63021171	MACS_peak_2119	0.94	0.752	chr3	63020720	63021121	MACS_peak_2119	0.815	0.812968	71
MACS_peak_2119	chr3-63020751-63021151	11.04	-1.13026	0.524778	chr3	63020671	63021171	MACS_peak_2119	1	0.8	chr3	63020720	63021121	MACS_peak_2119	0.925	0.922693	71
MACS_peak_2119	chr3-63020573-63020973	31.3151	-1.3762	0.409295	chr3	63020671	63021171	MACS_peak_2119	0.755	0.604	chr3	63020720	63021121	MACS_peak_2119	0.6325	0.630923	71
MACS_peak_2119	chr3-63020787-63021187	15.2807	-1.51373	0.362738	chr3	63020671	63021171	MACS_peak_2119	0.96	0.768	chr3	63020720	63021121	MACS_peak_2119	0.835	0.832918	71
MACS_peak_2119	chr3-63020649-63021049	6.01917	-1.54588	0.426067	chr3	63020671	63021171	MACS_peak_2119	0.945	0.756	chr3	63020720	63021121	MACS_peak_2119	0.8225	0.820449	71
MACS_peak_2119	chr3-63020793-63021193	16.9153	-2.62314	0.127015	chr3	63020671	63021171	MACS_peak_2119	0.945	0.756	chr3	63020720	63021121	MACS_peak_2119	0.82	0.817955	71
MACS_peak_2120	chr3-63819785-63820185	7.01927	2.56956	0.155491	chr3	63819638	63820138	MACS_peak_2120	0.8825	0.706	chr3	63819733	63820043	MACS_peak_2120	0.645	0.832258	68.31
MACS_peak_2120	chr3-63819611-63820011	26.5602	0.736175	0.772452	chr3	63819638	63820138	MACS_peak_2120	0.9325	0.746	chr3	63819733	63820043	MACS_peak_2120	0.695	0.896774	68.31
MACS_peak_2120	chr3-63819613-63820013	7.93612	-0.664493	0.749004	chr3	63819638	63820138	MACS_peak_2120	0.9375	0.75	chr3	63819733	63820043	MACS_peak_2120	0.7	0.903226	68.31
MACS_peak_2120	chr3-63819787-63820187	17.9427	-1.8475	0.289463	chr3	63819638	63820138	MACS_peak_2120	0.8775	0.702	chr3	63819733	63820043	MACS_peak_2120	0.64	0.825806	68.31
MACS_peak_2129	chr3-73989082-73989482	7.24886	-0.906824	0.620863	chr3	73989190	73989690	MACS_peak_2129	0.73	0.584	chr3	73989325	73989555	MACS_peak_2129	0.3925	0.682609	66.4
MACS_peak_2129	chr3-73989083-73989483	5.68194	-2.84766	0.0994549	chr3	73989190	73989690	MACS_peak_2129	0.7325	0.586	chr3	73989325	73989555	MACS_peak_2129	0.395	0.686957	66.4
MACS_peak_213	chr1-191742942-191743342	146.581	-0.24589	0.93955	chr1	191742790	191743290	MACS_peak_213	0.87	0.696	chr1	191742976	191743103	MACS_peak_213	0.3175	1	59.89
MACS_peak_213	chr1-191742929-191743329	6.63774	-0.806568	0.723302	chr1	191742790	191743290	MACS_peak_213	0.9025	0.722	chr1	191742976	191743103	MACS_peak_213	0.3175	1	59.89
MACS_peak_213	chr1-191742943-191743343	67.521	-0.849029	0.606554	chr1	191742790	191743290	MACS_peak_213	0.8675	0.694	chr1	191742976	191743103	MACS_peak_213	0.3175	1	59.89
MACS_peak_213	chr1-191742944-191743344	240.539	-1.15082	0.347698	chr1	191742790	191743290	MACS_peak_213	0.865	0.692	chr1	191742976	191743103	MACS_peak_213	0.3175	1	59.89
MACS_peak_213	chr1-191742931-191743331	11.3869	-1.42982	0.364012	chr1	191742790	191743290	MACS_peak_213	0.8975	0.718	chr1	191742976	191743103	MACS_peak_213	0.3175	1	59.89
MACS_peak_213	chr1-191742928-191743328	5.68369	-1.99798	0.304129	chr1	191742790	191743290	MACS_peak_213	0.905	0.724	chr1	191742976	191743103	MACS_peak_213	0.3175	1	59.89
MACS_peak_213	chr1-191742930-191743330	14.0737	-2.83756	0.0534783	chr1	191742790	191743290	MACS_peak_213	0.9	0.72	chr1	191742976	191743103	MACS_peak_213	0.3175	1	59.89
MACS_peak_2130	chr3-74003062-74003462	5.89369	0.828789	0.693429	chr3	74003177	74003677	MACS_peak_2130	0.7125	0.57	chr3	74003326	74003527	MACS_peak_2130	0.34	0.676617	63.3
MACS_peak_2130	chr3-74003384-74003784	6.97977	-1.08063	0.554393	chr3	74003177	74003677	MACS_peak_2130	0.7325	0.586	chr3	74003326	74003527	MACS_peak_2130	0.3575	0.711443	63.3
MACS_peak_2131	chr3-75097313-75097713	7.93702	-3.49766	0.0368875							chr3	75097503	75097748	MACS_peak_2131	0.525	0.857143	53.99
MACS_peak_2131	chr3-75097536-75097936	15.0717	2.99858	0.0994549							chr3	75097503	75097748	MACS_peak_2131	0.53	0.865306	53.99
MACS_peak_2131	chr3-75097534-75097934	13.3649	1.91018	0.224984							chr3	75097503	75097748	MACS_peak_2131	0.535	0.873469	53.99
MACS_peak_2131	chr3-75097532-75097932	18.7494	1.73123	0.248199							chr3	75097503	75097748	MACS_peak_2131	0.54	0.881633	53.99
MACS_peak_2131	chr3-75097535-75097935	14.471	1.57593	0.368359							chr3	75097503	75097748	MACS_peak_2131	0.5325	0.869388	53.99
MACS_peak_2131	chr3-75097533-75097933	5.85377	1.3316	0.4539							chr3	75097503	75097748	MACS_peak_2131	0.5375	0.877551	53.99
MACS_peak_2131	chr3-75097312-75097712	18.792	0.127124	0.970463							chr3	75097503	75097748	MACS_peak_2131	0.5225	0.853061	53.99
MACS_peak_2131	chr3-75097314-75097714	7.93212	0.0936545	0.970463							chr3	75097503	75097748	MACS_peak_2131	0.5275	0.861224	53.99
MACS_peak_2132	chr3-76109770-76110170	17.7435	2.98175	0.100464	chr3	76109592	76110092	MACS_peak_2132	0.805	0.644	chr3	76109772	76109912	MACS_peak_2132	0.35	1	71.93
MACS_peak_2132	chr3-76109768-76110168	7.5541	0.981103	0.631894	chr3	76109592	76110092	MACS_peak_2132	0.81	0.648	chr3	76109772	76109912	MACS_peak_2132	0.35	1	71.93
MACS_peak_2132	chr3-76109764-76110164	12.8215	0.508219	0.863467	chr3	76109592	76110092	MACS_peak_2132	0.82	0.656	chr3	76109772	76109912	MACS_peak_2132	0.35	1	71.93
MACS_peak_2132	chr3-76109546-76109946	5.87261	0.111581	0.970463	chr3	76109592	76110092	MACS_peak_2132	0.885	0.708	chr3	76109772	76109912	MACS_peak_2132	0.35	1	71.93
MACS_peak_2132	chr3-76109763-76110163	10.9954	-0.205263	0.962791	chr3	76109592	76110092	MACS_peak_2132	0.8225	0.658	chr3	76109772	76109912	MACS_peak_2132	0.35	1	71.93
MACS_peak_2132	chr3-76109635-76110035	73.8331	-0.701354	0.685654	chr3	76109592	76110092	MACS_peak_2132	1	0.8	chr3	76109772	76109912	MACS_peak_2132	0.35	1	71.93
MACS_peak_2132	chr3-76109766-76110166	16.806	-0.960548	0.585112	chr3	76109592	76110092	MACS_peak_2132	0.815	0.652	chr3	76109772	76109912	MACS_peak_2132	0.35	1	71.93
MACS_peak_2132	chr3-76109636-76110036	101.026	-0.968251	0.478277	chr3	76109592	76110092	MACS_peak_2132	1	0.8	chr3	76109772	76109912	MACS_peak_2132	0.35	1	71.93
MACS_peak_2132	chr3-76109548-76109948	20.1474	-0.976981	0.60184	chr3	76109592	76110092	MACS_peak_2132	0.89	0.712	chr3	76109772	76109912	MACS_peak_2132	0.35	1	71.93
MACS_peak_2132	chr3-76109761-76110161	11.8645	-1.05897	0.542844	chr3	76109592	76110092	MACS_peak_2132	0.8275	0.662	chr3	76109772	76109912	MACS_peak_2132	0.35	1	71.93
MACS_peak_2132	chr3-76109637-76110037	238.152	-1.06702	0.371475	chr3	76109592	76110092	MACS_peak_2132	1	0.8	chr3	76109772	76109912	MACS_peak_2132	0.35	1	71.93
MACS_peak_2132	chr3-76109769-76110169	13.7611	-1.32832	0.529477	chr3	76109592	76110092	MACS_peak_2132	0.8075	0.646	chr3	76109772	76109912	MACS_peak_2132	0.35	1	71.93
MACS_peak_2132	chr3-76109495-76109895	9.1395	-1.39075	0.393652	chr3	76109592	76110092	MACS_peak_2132	0.7575	0.606	chr3	76109772	76109912	MACS_peak_2132	0.3075	0.878571	71.93
MACS_peak_2132	chr3-76109762-76110162	11.8726	-1.62433	0.375777	chr3	76109592	76110092	MACS_peak_2132	0.825	0.66	chr3	76109772	76109912	MACS_peak_2132	0.35	1	71.93
MACS_peak_2132	chr3-76109632-76110032	5.68194	-2.84766	0.0994549	chr3	76109592	76110092	MACS_peak_2132	1	0.8	chr3	76109772	76109912	MACS_peak_2132	0.35	1	71.93
MACS_peak_2136	chr3-78075175-78075575	22.9302	0.272867	0.939533	chr3	78075028	78075528	MACS_peak_2136	0.8825	0.706	chr3	78075169	78075386	MACS_peak_2136	0.5275	0.97235	67.5
MACS_peak_2136	chr3-78075044-78075444	33.485	0.0991066	0.970463	chr3	78075028	78075528	MACS_peak_2136	1	0.8	chr3	78075169	78075386	MACS_peak_2136	0.5425	1	67.5
MACS_peak_2136	chr3-78075045-78075445	21.6775	-0.407181	0.887712	chr3	78075028	78075528	MACS_peak_2136	1	0.8	chr3	78075169	78075386	MACS_peak_2136	0.5425	1	67.5
MACS_peak_2136	chr3-78075046-78075446	279.676	-0.559279	0.693985	chr3	78075028	78075528	MACS_peak_2136	1	0.8	chr3	78075169	78075386	MACS_peak_2136	0.5425	1	67.5
MACS_peak_2136	chr3-78075176-78075576	7.64251	-1.6847	0.369739	chr3	78075028	78075528	MACS_peak_2136	0.88	0.704	chr3	78075169	78075386	MACS_peak_2136	0.525	0.967742	67.5
MACS_peak_2136	chr3-78075177-78075577	25.746	-1.99479	0.234353	chr3	78075028	78075528	MACS_peak_2136	0.8775	0.702	chr3	78075169	78075386	MACS_peak_2136	0.5225	0.963134	67.5
MACS_peak_2137	chr3-78428723-78429123	15.2612	4.07509	0.0298645	chr3	78428717	78429217	MACS_peak_2137	1	0.8	chr3	78428875	78429058	MACS_peak_2137	0.4575	1	63.27
MACS_peak_2142	chr3-80750875-80751275	5.90961	-1.32182	0.46464	chr3	80750966	80751466	MACS_peak_2142	0.7725	0.618	chr3	80751049	80751382	MACS_peak_2142	0.565	0.678679	64.61
MACS_peak_2145	chr3-82410094-82410494	6.81078	-0.702063	0.729975	chr3	82409882	82410382	MACS_peak_2145	0.72	0.576	chr3	82410016	82410247	MACS_peak_2145	0.3825	0.662338	60.51
MACS_peak_2145	chr3-82409788-82410188	6.43877	-2.28681	0.223161	chr3	82409882	82410382	MACS_peak_2145	0.765	0.612	chr3	82410016	82410247	MACS_peak_2145	0.43	0.744589	60.51
MACS_peak_2146	chr3-82550621-82551021	8.18418	0.0766664	0.970463	chr3	82550556	82551056	MACS_peak_2146	1	0.8	chr3	82550648	82550964	MACS_peak_2146	0.79	1	84.9
MACS_peak_2146	chr3-82550623-82551023	17.2173	-0.585706	0.794379	chr3	82550556	82551056	MACS_peak_2146	1	0.8	chr3	82550648	82550964	MACS_peak_2146	0.79	1	84.9
MACS_peak_2146	chr3-82550622-82551022	13.7642	-0.681478	0.786023	chr3	82550556	82551056	MACS_peak_2146	1	0.8	chr3	82550648	82550964	MACS_peak_2146	0.79	1	84.9
MACS_peak_2152	chr3-85556844-85557244	28.1473	4.37914	0.0147841	chr3	85556870	85557370	MACS_peak_2152	0.935	0.748	chr3	85557002	85557238	MACS_peak_2152	0.59	1	65.48
MACS_peak_2152	chr3-85556987-85557387	31.2126	3.78231	0.0402432	chr3	85556870	85557370	MACS_peak_2152	0.9575	0.766	chr3	85557002	85557238	MACS_peak_2152	0.59	1	65.48
MACS_peak_2152	chr3-85556845-85557245	225.193	3.61403	0.00794774	chr3	85556870	85557370	MACS_peak_2152	0.9375	0.75	chr3	85557002	85557238	MACS_peak_2152	0.59	1	65.48
MACS_peak_2152	chr3-85556942-85557342	136.816	3.44762	0.0362369	chr3	85556870	85557370	MACS_peak_2152	1	0.8	chr3	85557002	85557238	MACS_peak_2152	0.59	1	65.48
MACS_peak_2152	chr3-85556943-85557343	104.111	3.43882	0.0280863	chr3	85556870	85557370	MACS_peak_2152	1	0.8	chr3	85557002	85557238	MACS_peak_2152	0.59	1	65.48
MACS_peak_2152	chr3-85557018-85557418	51.6533	3.3962	0.0392414	chr3	85556870	85557370	MACS_peak_2152	0.88	0.704	chr3	85557002	85557238	MACS_peak_2152	0.55	0.932203	65.48
MACS_peak_2152	chr3-85556991-85557391	117.196	3.39529	0.0298645	chr3	85556870	85557370	MACS_peak_2152	0.9475	0.758	chr3	85557002	85557238	MACS_peak_2152	0.59	1	65.48
MACS_peak_2152	chr3-85557019-85557419	45.6198	2.81127	0.0994549	chr3	85556870	85557370	MACS_peak_2152	0.8775	0.702	chr3	85557002	85557238	MACS_peak_2152	0.5475	0.927966	65.48
MACS_peak_2152	chr3-85556847-85557247	157.046	2.53434	0.0797612	chr3	85556870	85557370	MACS_peak_2152	0.9425	0.754	chr3	85557002	85557238	MACS_peak_2152	0.59	1	65.48
MACS_peak_2152	chr3-85557038-85557438	8.13188	2.48035	0.183069	chr3	85556870	85557370	MACS_peak_2152	0.83	0.664	chr3	85557002	85557238	MACS_peak_2152	0.5	0.847458	65.48
MACS_peak_2152	chr3-85556945-85557345	169.506	2.28154	0.0822626	chr3	85556870	85557370	MACS_peak_2152	1	0.8	chr3	85557002	85557238	MACS_peak_2152	0.59	1	65.48
MACS_peak_2152	chr3-85556941-85557341	12.9098	2.0401	0.310664	chr3	85556870	85557370	MACS_peak_2152	1	0.8	chr3	85557002	85557238	MACS_peak_2152	0.59	1	65.48
MACS_peak_2152	chr3-85556993-85557393	78.9429	1.77937	0.251585	chr3	85556870	85557370	MACS_peak_2152	0.9425	0.754	chr3	85557002	85557238	MACS_peak_2152	0.59	1	65.48
MACS_peak_2152	chr3-85556877-85557277	404.988	1.69311	0.366464	chr3	85556870	85557370	MACS_peak_2152	1	0.8	chr3	85557002	85557238	MACS_peak_2152	0.59	1	65.48
MACS_peak_2152	chr3-85556992-85557392	69.7727	1.49331	0.327025	chr3	85556870	85557370	MACS_peak_2152	0.945	0.756	chr3	85557002	85557238	MACS_peak_2152	0.59	1	65.48
MACS_peak_2152	chr3-85556879-85557279	867.209	1.4031	0.230127	chr3	85556870	85557370	MACS_peak_2152	1	0.8	chr3	85557002	85557238	MACS_peak_2152	0.59	1	65.48
MACS_peak_2152	chr3-85557020-85557420	68.4083	1.40096	0.408877	chr3	85556870	85557370	MACS_peak_2152	0.875	0.7	chr3	85557002	85557238	MACS_peak_2152	0.545	0.923729	65.48
MACS_peak_2152	chr3-85556944-85557344	75.6367	1.21467	0.473064	chr3	85556870	85557370	MACS_peak_2152	1	0.8	chr3	85557002	85557238	MACS_peak_2152	0.59	1	65.48
MACS_peak_2152	chr3-85557039-85557439	24.9869	0.701815	0.73858	chr3	85556870	85557370	MACS_peak_2152	0.8275	0.662	chr3	85557002	85557238	MACS_peak_2152	0.4975	0.84322	65.48
MACS_peak_2152	chr3-85557041-85557441	24.7964	0.5636	0.823873	chr3	85556870	85557370	MACS_peak_2152	0.8225	0.658	chr3	85557002	85557238	MACS_peak_2152	0.4925	0.834746	65.48
MACS_peak_2156	chr3-87626830-87627230	100.187	-2.59155	0.106214	chr3	87626702	87627202	MACS_peak_2156	0.93	0.744	chr3	87626850	87627053	MACS_peak_2156	0.5075	1	59.94
MACS_peak_2157	chr3-89046384-89046784	59.4561	5.00882	0.000748164	chr3	89046352	89046852	MACS_peak_2157	1	0.8	chr3	89046402	89046801	MACS_peak_2157	0.955	0.957393	102.11
MACS_peak_2157	chr3-89046383-89046783	10.838	3.99606	0.0142162	chr3	89046352	89046852	MACS_peak_2157	1	0.8	chr3	89046402	89046801	MACS_peak_2157	0.9525	0.954887	102.11
MACS_peak_2157	chr3-89046386-89046786	21.7609	2.88183	0.072237	chr3	89046352	89046852	MACS_peak_2157	1	0.8	chr3	89046402	89046801	MACS_peak_2157	0.96	0.962406	102.11
MACS_peak_2157	chr3-89046450-89046850	102.163	2.81272	0.0620971	chr3	89046352	89046852	MACS_peak_2157	1	0.8	chr3	89046402	89046801	MACS_peak_2157	0.8775	0.879699	102.11
MACS_peak_2157	chr3-89046539-89046939	13.5712	2.76013	0.0691062	chr3	89046352	89046852	MACS_peak_2157	0.7825	0.626	chr3	89046402	89046801	MACS_peak_2157	0.655	0.656642	102.11
MACS_peak_2157	chr3-89046385-89046785	27.8853	2.27428	0.120073	chr3	89046352	89046852	MACS_peak_2157	1	0.8	chr3	89046402	89046801	MACS_peak_2157	0.9575	0.9599	102.11
MACS_peak_2157	chr3-89046506-89046906	24.7481	2.07787	0.136764	chr3	89046352	89046852	MACS_peak_2157	0.865	0.692	chr3	89046402	89046801	MACS_peak_2157	0.7375	0.739348	102.11
MACS_peak_2157	chr3-89046449-89046849	254.775	2.04032	0.19795	chr3	89046352	89046852	MACS_peak_2157	1	0.8	chr3	89046402	89046801	MACS_peak_2157	0.88	0.882206	102.11
MACS_peak_2157	chr3-89046387-89046787	26.3801	1.87205	0.219582	chr3	89046352	89046852	MACS_peak_2157	1	0.8	chr3	89046402	89046801	MACS_peak_2157	0.9625	0.964912	102.11
MACS_peak_2157	chr3-89046448-89046848	245.508	1.77254	0.201619	chr3	89046352	89046852	MACS_peak_2157	1	0.8	chr3	89046402	89046801	MACS_peak_2157	0.8825	0.884712	102.11
MACS_peak_2157	chr3-89046447-89046847	212.27	1.27011	0.357601	chr3	89046352	89046852	MACS_peak_2157	1	0.8	chr3	89046402	89046801	MACS_peak_2157	0.885	0.887218	102.11
MACS_peak_2157	chr3-89046536-89046936	73.249	1.02855	0.593389	chr3	89046352	89046852	MACS_peak_2157	0.79	0.632	chr3	89046402	89046801	MACS_peak_2157	0.6625	0.66416	102.11
MACS_peak_2157	chr3-89046433-89046833	12.4445	0.866118	0.66027	chr3	89046352	89046852	MACS_peak_2157	1	0.8	chr3	89046402	89046801	MACS_peak_2157	0.92	0.922306	102.11
MACS_peak_2157	chr3-89046507-89046907	13.5641	0.825059	0.65958	chr3	89046352	89046852	MACS_peak_2157	0.8625	0.69	chr3	89046402	89046801	MACS_peak_2157	0.735	0.736842	102.11
MACS_peak_2157	chr3-89046508-89046908	19.3118	0.765693	0.684627	chr3	89046352	89046852	MACS_peak_2157	0.86	0.688	chr3	89046402	89046801	MACS_peak_2157	0.7325	0.734336	102.11
MACS_peak_2157	chr3-89046534-89046934	70.4936	0.434673	0.860724	chr3	89046352	89046852	MACS_peak_2157	0.795	0.636	chr3	89046402	89046801	MACS_peak_2157	0.6675	0.669173	102.11
MACS_peak_2157	chr3-89046540-89046940	50.1848	0.426831	0.863467	chr3	89046352	89046852	MACS_peak_2157	0.78	0.624	chr3	89046402	89046801	MACS_peak_2157	0.6525	0.654135	102.11
MACS_peak_2157	chr3-89046434-89046834	7.93212	0.0936545	0.970463	chr3	89046352	89046852	MACS_peak_2157	1	0.8	chr3	89046402	89046801	MACS_peak_2157	0.9175	0.919799	102.11
MACS_peak_2157	chr3-89046538-89046938	69.8024	-0.24086	0.934746	chr3	89046352	89046852	MACS_peak_2157	0.785	0.628	chr3	89046402	89046801	MACS_peak_2157	0.6575	0.659148	102.11
MACS_peak_2157	chr3-89046541-89046941	17.7116	-0.550813	0.829471	chr3	89046352	89046852	MACS_peak_2157	0.7775	0.622	chr3	89046402	89046801	MACS_peak_2157	0.65	0.651629	102.11
MACS_peak_2162	chr3-94125515-94125915	7.93212	0.0936545	0.970463	chr3	94125503	94126003	MACS_peak_2162	1	0.8	chr3	94125669	94125837	MACS_peak_2162	0.42	1	65.15
MACS_peak_2162	chr3-94125587-94125987	7.39707	0.0703309	0.970463	chr3	94125503	94126003	MACS_peak_2162	1	0.8	chr3	94125669	94125837	MACS_peak_2162	0.42	1	65.15
MACS_peak_2162	chr3-94125518-94125918	9.222	-1.00764	0.60493	chr3	94125503	94126003	MACS_peak_2162	1	0.8	chr3	94125669	94125837	MACS_peak_2162	0.42	1	65.15
MACS_peak_2162	chr3-94125517-94125917	24.0066	-1.37521	0.463731	chr3	94125503	94126003	MACS_peak_2162	1	0.8	chr3	94125669	94125837	MACS_peak_2162	0.42	1	65.15
MACS_peak_2162	chr3-94125619-94126019	6.58362	-1.9325	0.263044	chr3	94125503	94126003	MACS_peak_2162	0.96	0.768	chr3	94125669	94125837	MACS_peak_2162	0.42	1	65.15
MACS_peak_2162	chr3-94125589-94125989	7.12442	-2.08604	0.250656	chr3	94125503	94126003	MACS_peak_2162	1	0.8	chr3	94125669	94125837	MACS_peak_2162	0.42	1	65.15
MACS_peak_2164	chr3-96032623-96033023	39.2703	-5.31532	0.000985165	chr3	96032626	96033126	MACS_peak_2164	0.9925	0.794	chr3	96032767	96032985	MACS_peak_2164	0.545	1	68.33
MACS_peak_2164	chr3-96032617-96033017	9.36792	0.836288	0.636948	chr3	96032626	96033126	MACS_peak_2164	0.9775	0.782	chr3	96032767	96032985	MACS_peak_2164	0.545	1	68.33
MACS_peak_2164	chr3-96032618-96033018	9.35789	0.536482	0.811847	chr3	96032626	96033126	MACS_peak_2164	0.98	0.784	chr3	96032767	96032985	MACS_peak_2164	0.545	1	68.33
MACS_peak_2164	chr3-96032616-96033016	12.3124	-0.497511	0.829092	chr3	96032626	96033126	MACS_peak_2164	0.975	0.78	chr3	96032767	96032985	MACS_peak_2164	0.545	1	68.33
MACS_peak_2164	chr3-96032571-96032971	6.391	-1.27076	0.495507	chr3	96032626	96033126	MACS_peak_2164	0.8625	0.69	chr3	96032767	96032985	MACS_peak_2164	0.51	0.93578	68.33
MACS_peak_2165	chr3-96271650-96272050	8.33164	3.40967	0.0534783	chr3	96271446	96271946	MACS_peak_2165	0.74	0.592	chr3	96271571	96271821	MACS_peak_2165	0.4275	0.684	62.44
MACS_peak_2165	chr3-96271566-96271966	7.50859	-0.455419	0.856884	chr3	96271446	96271946	MACS_peak_2165	0.95	0.76	chr3	96271571	96271821	MACS_peak_2165	0.625	1	62.44
MACS_peak_2171	chr3-103078284-103078684	259.939	0.327984	0.929588	chr3	103078196	103078696	MACS_peak_2171	1	0.8	chr3	103078321	103078571	MACS_peak_2171	0.625	1	73.94
MACS_peak_2171	chr3-103078285-103078685	120.034	-0.35468	0.879112	chr3	103078196	103078696	MACS_peak_2171	1	0.8	chr3	103078321	103078571	MACS_peak_2171	0.625	1	73.94
MACS_peak_2171	chr3-103078205-103078605	85.318	-0.755472	0.633378	chr3	103078196	103078696	MACS_peak_2171	1	0.8	chr3	103078321	103078571	MACS_peak_2171	0.625	1	73.94
MACS_peak_2171	chr3-103078286-103078686	330.477	-0.863716	0.524395	chr3	103078196	103078696	MACS_peak_2171	1	0.8	chr3	103078321	103078571	MACS_peak_2171	0.625	1	73.94
MACS_peak_2171	chr3-103078206-103078606	94.5809	-1.18627	0.492998	chr3	103078196	103078696	MACS_peak_2171	1	0.8	chr3	103078321	103078571	MACS_peak_2171	0.625	1	73.94
MACS_peak_2173	chr3-105091284-105091684	34.2341	4.87914	0.00281354	chr3	105091156	105091656	MACS_peak_2173	0.93	0.744	chr3	105091122	105091689	MACS_peak_2173	1	0.705467	111.8
MACS_peak_2173	chr3-105091166-105091566	27.5463	2.16851	0.183978	chr3	105091156	105091656	MACS_peak_2173	1	0.8	chr3	105091122	105091689	MACS_peak_2173	1	0.705467	111.8
MACS_peak_2173	chr3-105091283-105091683	11.1406	2.13903	0.232519	chr3	105091156	105091656	MACS_peak_2173	0.9325	0.746	chr3	105091122	105091689	MACS_peak_2173	1	0.705467	111.8
MACS_peak_2173	chr3-105091282-105091682	37.8996	0.77625	0.713426	chr3	105091156	105091656	MACS_peak_2173	0.935	0.748	chr3	105091122	105091689	MACS_peak_2173	1	0.705467	111.8
MACS_peak_2176	chr3-107776082-107776482	6.93153	2.39521	0.195853	chr3	107776143	107776643	MACS_peak_2176	0.8475	0.678	chr3	107776207	107776579	MACS_peak_2176	0.6875	0.739247	63.99
MACS_peak_2176	chr3-107776083-107776483	26.3316	-1.01577	0.682288	chr3	107776143	107776643	MACS_peak_2176	0.85	0.68	chr3	107776207	107776579	MACS_peak_2176	0.69	0.741935	63.99
MACS_peak_2176	chr3-107776084-107776484	23.4468	-1.20631	0.511819	chr3	107776143	107776643	MACS_peak_2176	0.8525	0.682	chr3	107776207	107776579	MACS_peak_2176	0.6925	0.744624	63.99
MACS_peak_2177	chr3-108846353-108846753	8.33164	3.40967	0.0534783	chr3	108846202	108846702	MACS_peak_2177	0.8725	0.698	chr3	108846348	108846555	MACS_peak_2177	0.505	0.975845	64.41
MACS_peak_2177	chr3-108846344-108846744	17.8284	2.44162	0.125663	chr3	108846202	108846702	MACS_peak_2177	0.895	0.716	chr3	108846348	108846555	MACS_peak_2177	0.5175	1	64.41
MACS_peak_2177	chr3-108846333-108846733	7.3794	0.608802	0.765183	chr3	108846202	108846702	MACS_peak_2177	0.9225	0.738	chr3	108846348	108846555	MACS_peak_2177	0.5175	1	64.41
MACS_peak_2177	chr3-108846314-108846714	7.38867	0.302916	0.914708	chr3	108846202	108846702	MACS_peak_2177	0.97	0.776	chr3	108846348	108846555	MACS_peak_2177	0.5175	1	64.41
MACS_peak_2177	chr3-108846346-108846746	21.0686	0.0598183	0.970779	chr3	108846202	108846702	MACS_peak_2177	0.89	0.712	chr3	108846348	108846555	MACS_peak_2177	0.5175	1	64.41
MACS_peak_2177	chr3-108846332-108846732	21.825	-0.236188	0.970463	chr3	108846202	108846702	MACS_peak_2177	0.925	0.74	chr3	108846348	108846555	MACS_peak_2177	0.5175	1	64.41
MACS_peak_2177	chr3-108846313-108846713	9.61725	-0.645431	0.777517	chr3	108846202	108846702	MACS_peak_2177	0.9725	0.778	chr3	108846348	108846555	MACS_peak_2177	0.5175	1	64.41
MACS_peak_2177	chr3-108846356-108846756	6.93021	-0.933224	0.608206	chr3	108846202	108846702	MACS_peak_2177	0.865	0.692	chr3	108846348	108846555	MACS_peak_2177	0.4975	0.961353	64.41
MACS_peak_2177	chr3-108846312-108846712	12.9843	-1.03838	0.543563	chr3	108846202	108846702	MACS_peak_2177	0.975	0.78	chr3	108846348	108846555	MACS_peak_2177	0.5175	1	64.41
MACS_peak_2177	chr3-108846331-108846731	15.7188	-1.43623	0.387863	chr3	108846202	108846702	MACS_peak_2177	0.9275	0.742	chr3	108846348	108846555	MACS_peak_2177	0.5175	1	64.41
MACS_peak_2178	chr3-109676609-109677009	8.92858	0.131598	0.970463	chr3	109676548	109677048	MACS_peak_2178	1	0.8	chr3	109676687	109676908	MACS_peak_2178	0.5525	1	59.93
MACS_peak_2178	chr3-109676605-109677005	12.4255	0.101558	0.970463	chr3	109676548	109677048	MACS_peak_2178	1	0.8	chr3	109676687	109676908	MACS_peak_2178	0.5525	1	59.93
MACS_peak_2180	chr3-111228090-111228490	12.099	2.95857	0.0985795	chr3	111228180	111228680	MACS_peak_2180	0.775	0.62	chr3	111228276	111228584	MACS_peak_2180	0.535	0.694805	119.29
MACS_peak_2180	chr3-111228089-111228489	24.4591	1.9084	0.254176	chr3	111228180	111228680	MACS_peak_2180	0.7725	0.618	chr3	111228276	111228584	MACS_peak_2180	0.5325	0.691558	119.29
MACS_peak_2180	chr3-111228087-111228487	35.8912	0.757437	0.710059	chr3	111228180	111228680	MACS_peak_2180	0.7675	0.614	chr3	111228276	111228584	MACS_peak_2180	0.5275	0.685065	119.29
MACS_peak_2180	chr3-111228088-111228488	15.1536	-0.0949884	0.970463	chr3	111228180	111228680	MACS_peak_2180	0.77	0.616	chr3	111228276	111228584	MACS_peak_2180	0.53	0.688312	119.29
MACS_peak_2182	chr3-114152433-114152833	6.80878	0.101477	0.970463	chr3	114152303	114152803	MACS_peak_2182	0.925	0.74	chr3	114152465	114152640	MACS_peak_2182	0.4375	1	59.94
MACS_peak_2182	chr3-114152456-114152856	9.63698	0.0850167	0.970463	chr3	114152303	114152803	MACS_peak_2182	0.8675	0.694	chr3	114152465	114152640	MACS_peak_2182	0.4375	1	59.94
MACS_peak_2182	chr3-114152457-114152857	8.22917	-0.0756125	0.970463	chr3	114152303	114152803	MACS_peak_2182	0.865	0.692	chr3	114152465	114152640	MACS_peak_2182	0.4375	1	59.94
MACS_peak_2182	chr3-114152432-114152832	7.40318	-0.393228	0.890479	chr3	114152303	114152803	MACS_peak_2182	0.9275	0.742	chr3	114152465	114152640	MACS_peak_2182	0.4375	1	59.94
MACS_peak_2182	chr3-114152176-114152576	7.36922	-0.571243	0.839198	chr3	114152303	114152803	MACS_peak_2182	0.6825	0.546	chr3	114152465	114152640	MACS_peak_2182	0.2775	0.634286	59.94
MACS_peak_2182	chr3-114152390-114152790	7.06753	-0.58757	0.777074	chr3	114152303	114152803	MACS_peak_2182	1	0.8	chr3	114152465	114152640	MACS_peak_2182	0.4375	1	59.94
MACS_peak_2182	chr3-114152459-114152859	5.56964	-1.2546	0.489886	chr3	114152303	114152803	MACS_peak_2182	0.86	0.688	chr3	114152465	114152640	MACS_peak_2182	0.4375	1	59.94
MACS_peak_2182	chr3-114152460-114152860	8.06984	-1.30711	0.444703	chr3	114152303	114152803	MACS_peak_2182	0.8575	0.686	chr3	114152465	114152640	MACS_peak_2182	0.4375	1	59.94
MACS_peak_2182	chr3-114152173-114152573	6.84357	-1.36457	0.424544	chr3	114152303	114152803	MACS_peak_2182	0.675	0.54	chr3	114152465	114152640	MACS_peak_2182	0.27	0.617143	59.94
MACS_peak_2182	chr3-114152450-114152850	22.8949	-1.58324	0.439634	chr3	114152303	114152803	MACS_peak_2182	0.8825	0.706	chr3	114152465	114152640	MACS_peak_2182	0.4375	1	59.94
MACS_peak_2182	chr3-114152434-114152834	10.7961	-1.72238	0.312643	chr3	114152303	114152803	MACS_peak_2182	0.9225	0.738	chr3	114152465	114152640	MACS_peak_2182	0.4375	1	59.94
MACS_peak_2187	chr3-121450217-121450617	10.1921	-3.54852	0.0534783	chr3	121450197	121450697	MACS_peak_2187	1	0.8	chr3	121450244	121450650	MACS_peak_2187	0.9325	0.918719	134.81
MACS_peak_2189	chr3-122653021-122653421	13.7486	2.51012	0.15116	chr3	122653008	122653508	MACS_peak_2189	1	0.8	chr3	122653153	122653362	MACS_peak_2189	0.5225	1	72.01
MACS_peak_2189	chr3-122653011-122653411	39.4849	1.32387	0.382215	chr3	122653008	122653508	MACS_peak_2189	1	0.8	chr3	122653153	122653362	MACS_peak_2189	0.5225	1	72.01
MACS_peak_2189	chr3-122653012-122653412	56.7837	1.12313	0.581157	chr3	122653008	122653508	MACS_peak_2189	1	0.8	chr3	122653153	122653362	MACS_peak_2189	0.5225	1	72.01
MACS_peak_2189	chr3-122653010-122653410	399.956	0.695669	0.671194	chr3	122653008	122653508	MACS_peak_2189	1	0.8	chr3	122653153	122653362	MACS_peak_2189	0.5225	1	72.01
MACS_peak_2189	chr3-122653020-122653420	6.6076	0.608955	0.779734	chr3	122653008	122653508	MACS_peak_2189	1	0.8	chr3	122653153	122653362	MACS_peak_2189	0.5225	1	72.01
MACS_peak_2189	chr3-122653022-122653422	10.7726	-0.184353	0.970463	chr3	122653008	122653508	MACS_peak_2189	1	0.8	chr3	122653153	122653362	MACS_peak_2189	0.5225	1	72.01
MACS_peak_219	chr1-193660787-193661187	11.444	2.21311	0.160633	chr1	193660865	193661365	MACS_peak_219	0.805	0.644	chr1	193660961	193661268	MACS_peak_219	0.565	0.736156	71.69
MACS_peak_219	chr1-193660912-193661312	8.30992	1.41535	0.426982	chr1	193660865	193661365	MACS_peak_219	1	0.8	chr1	193660961	193661268	MACS_peak_219	0.7675	1	71.69
MACS_peak_219	chr1-193660789-193661189	16.6486	0.832548	0.660708	chr1	193660865	193661365	MACS_peak_219	0.81	0.648	chr1	193660961	193661268	MACS_peak_219	0.57	0.742671	71.69
MACS_peak_219	chr1-193660910-193661310	16.2988	-0.538339	0.812626	chr1	193660865	193661365	MACS_peak_219	1	0.8	chr1	193660961	193661268	MACS_peak_219	0.7675	1	71.69
MACS_peak_219	chr1-193660913-193661313	8.18829	-0.592671	0.830441	chr1	193660865	193661365	MACS_peak_219	1	0.8	chr1	193660961	193661268	MACS_peak_219	0.7675	1	71.69
MACS_peak_219	chr1-193660911-193661311	12.4802	-2.09085	0.201909	chr1	193660865	193661365	MACS_peak_219	1	0.8	chr1	193660961	193661268	MACS_peak_219	0.7675	1	71.69
MACS_peak_2191	chr3-124115957-124116357	26.9637	2.58214	0.0994549	chr3	124115844	124116344	MACS_peak_2191	0.9675	0.774	chr3	124115888	124116299	MACS_peak_2191	0.855	0.832117	94.51
MACS_peak_2191	chr3-124115959-124116359	11.7266	2.36824	0.220359	chr3	124115844	124116344	MACS_peak_2191	0.9625	0.77	chr3	124115888	124116299	MACS_peak_2191	0.85	0.827251	94.51
MACS_peak_2191	chr3-124115940-124116340	7.08308	0.997589	0.627421	chr3	124115844	124116344	MACS_peak_2191	1	0.8	chr3	124115888	124116299	MACS_peak_2191	0.8975	0.873479	94.51
MACS_peak_2191	chr3-124115942-124116342	6.10992	0.69627	0.740704	chr3	124115844	124116344	MACS_peak_2191	1	0.8	chr3	124115888	124116299	MACS_peak_2191	0.8925	0.868613	94.51
MACS_peak_2191	chr3-124115958-124116358	7.93212	0.0936545	0.970463	chr3	124115844	124116344	MACS_peak_2191	0.965	0.772	chr3	124115888	124116299	MACS_peak_2191	0.8525	0.829684	94.51
MACS_peak_2192	chr3-125838251-125838651	13.033	1.44831	0.393064	chr3	125838192	125838692	MACS_peak_2192	1	0.8	chr3	125838279	125838604	MACS_peak_2192	0.8125	1	94.91
MACS_peak_2192	chr3-125838249-125838649	7.01934	0.473996	0.837336	chr3	125838192	125838692	MACS_peak_2192	1	0.8	chr3	125838279	125838604	MACS_peak_2192	0.8125	1	94.91
MACS_peak_2192	chr3-125838227-125838627	10.1921	-3.54852	0.0534783	chr3	125838192	125838692	MACS_peak_2192	1	0.8	chr3	125838279	125838604	MACS_peak_2192	0.8125	1	94.91
MACS_peak_2195	chr3-128889076-128889476	6.09349	-0.561613	0.828854	chr3	128888857	128889357	MACS_peak_2195	0.7025	0.562	chr3	128888972	128889242	MACS_peak_2195	0.415	0.614815	86.49
MACS_peak_2195	chr3-128889074-128889474	10.2302	-0.933078	0.613019	chr3	128888857	128889357	MACS_peak_2195	0.7075	0.566	chr3	128888972	128889242	MACS_peak_2195	0.42	0.622222	86.49
MACS_peak_2195	chr3-128888911-128889311	7.01758	-1.77253	0.299737	chr3	128888857	128889357	MACS_peak_2195	1	0.8	chr3	128888972	128889242	MACS_peak_2195	0.675	1	86.49
MACS_peak_2195	chr3-128888910-128889310	14.3642	-2.15283	0.156234	chr3	128888857	128889357	MACS_peak_2195	1	0.8	chr3	128888972	128889242	MACS_peak_2195	0.675	1	86.49
MACS_peak_2202	chr3-140142379-140142779	22.2609	4.17206	0.0176567							chr3	140142461	140142639	MACS_peak_2202	0.445	1	51.96
MACS_peak_2202	chr3-140142377-140142777	7.89616	1.94429	0.222884							chr3	140142461	140142639	MACS_peak_2202	0.445	1	51.96
MACS_peak_2202	chr3-140142326-140142726	16.9044	0.860466	0.691755							chr3	140142461	140142639	MACS_peak_2202	0.445	1	51.96
MACS_peak_2207	chr3-144111918-144112318	11.2192	0.0346485	0.983063	chr3	144112039	144112539	MACS_peak_2207	0.6975	0.558	chr3	144112144	144112434	MACS_peak_2207	0.435	0.6	59.88
MACS_peak_2207	chr3-144111920-144112320	8.9714	-0.56532	0.786952	chr3	144112039	144112539	MACS_peak_2207	0.7025	0.562	chr3	144112144	144112434	MACS_peak_2207	0.44	0.606897	59.88
MACS_peak_2207	chr3-144112177-144112577	6.46671	-1.29753	0.466877	chr3	144112039	144112539	MACS_peak_2207	0.905	0.724	chr3	144112144	144112434	MACS_peak_2207	0.6425	0.886207	59.88
MACS_peak_2209	chr3-146299781-146300181	11.5541	4.09979	0.0112658							chr3	146299793	146300071	MACS_peak_2209	0.695	1	59.66
MACS_peak_2209	chr3-146299873-146300273	43.6303	3.90445	0.0113415							chr3	146299793	146300071	MACS_peak_2209	0.495	0.71223	59.66
MACS_peak_2209	chr3-146299871-146300271	74.3338	2.76348	0.0438927							chr3	146299793	146300071	MACS_peak_2209	0.5	0.719424	59.66
MACS_peak_2209	chr3-146299791-146300191	8.33164	3.40967	0.0534783							chr3	146299793	146300071	MACS_peak_2209	0.695	1	59.66
MACS_peak_2209	chr3-146299872-146300272	24.3608	3.15509	0.0534783							chr3	146299793	146300071	MACS_peak_2209	0.4975	0.715827	59.66
MACS_peak_2209	chr3-146299780-146300180	8.89043	2.4606	0.163849							chr3	146299793	146300071	MACS_peak_2209	0.695	1	59.66
MACS_peak_2209	chr3-146299779-146300179	22.3775	1.54262	0.339328							chr3	146299793	146300071	MACS_peak_2209	0.695	1	59.66
MACS_peak_221	chr1-194199816-194200216	6.99246	1.83409	0.26888							chr1	194199880	194200109	MACS_peak_221	0.5725	1	56.11
MACS_peak_221	chr1-194199814-194200214	8.25997	0.861181	0.685405							chr1	194199880	194200109	MACS_peak_221	0.5725	1	56.11
MACS_peak_2212	chr3-148909613-148910013	6.61728	0.028443	0.988149	chr3	148909696	148910196	MACS_peak_2212	0.7925	0.634	chr3	148909664	148910228	MACS_peak_2212	0.8725	0.618794	265.07
MACS_peak_2212	chr3-148909615-148910015	9.5639	-1.13484	0.563704	chr3	148909696	148910196	MACS_peak_2212	0.7975	0.638	chr3	148909664	148910228	MACS_peak_2212	0.8775	0.62234	265.07
MACS_peak_2214	chr3-151033611-151034011	6.23811	3.03479	0.0594333	chr3	151033649	151034149	MACS_peak_2214	0.905	0.724	chr3	151033705	151034093	MACS_peak_2214	0.765	0.78866	61.24
MACS_peak_2214	chr3-151033610-151034010	17.543	2.93448	0.109792	chr3	151033649	151034149	MACS_peak_2214	0.9025	0.722	chr3	151033705	151034093	MACS_peak_2214	0.7625	0.786082	61.24
MACS_peak_2214	chr3-151033609-151034009	11.3537	0.526639	0.835169	chr3	151033649	151034149	MACS_peak_2214	0.9	0.72	chr3	151033705	151034093	MACS_peak_2214	0.76	0.783505	61.24
MACS_peak_2222	chr3-159194351-159194751	6.02577	3.06077	0.0854051	chr3	159194254	159194754	MACS_peak_2222	1	0.8	chr3	159194432	159194576	MACS_peak_2222	0.36	1	77.82
MACS_peak_2222	chr3-159194355-159194755	5.78807	-0.809867	0.683066	chr3	159194254	159194754	MACS_peak_2222	0.9975	0.798	chr3	159194432	159194576	MACS_peak_2222	0.36	1	77.82
MACS_peak_2223	chr3-159547294-159547694	32.2052	4.80916	0.00147111	chr3	159547322	159547822	MACS_peak_2223	0.93	0.744	chr3	159547310	159547834	MACS_peak_2223	0.96	0.732824	382.91
MACS_peak_2223	chr3-159547376-159547776	131.901	2.92642	0.0307046	chr3	159547322	159547822	MACS_peak_2223	1	0.8	chr3	159547310	159547834	MACS_peak_2223	1	0.763359	382.91
MACS_peak_2223	chr3-159547375-159547775	225.358	2.82296	0.0311572	chr3	159547322	159547822	MACS_peak_2223	1	0.8	chr3	159547310	159547834	MACS_peak_2223	1	0.763359	382.91
MACS_peak_2223	chr3-159547330-159547730	17.5395	3.44905	0.0517608	chr3	159547322	159547822	MACS_peak_2223	1	0.8	chr3	159547310	159547834	MACS_peak_2223	1	0.763359	382.91
MACS_peak_2223	chr3-159547295-159547695	12.825	3.07472	0.0994549	chr3	159547322	159547822	MACS_peak_2223	0.9325	0.746	chr3	159547310	159547834	MACS_peak_2223	0.9625	0.734733	382.91
MACS_peak_2223	chr3-159547377-159547777	38.7755	3.04961	0.0534783	chr3	159547322	159547822	MACS_peak_2223	1	0.8	chr3	159547310	159547834	MACS_peak_2223	1	0.763359	382.91
MACS_peak_2223	chr3-159547379-159547779	80.3424	2.72386	0.0888616	chr3	159547322	159547822	MACS_peak_2223	1	0.8	chr3	159547310	159547834	MACS_peak_2223	1	0.763359	382.91
MACS_peak_2223	chr3-159547445-159547845	61.6824	2.04155	0.135664	chr3	159547322	159547822	MACS_peak_2223	0.9425	0.754	chr3	159547310	159547834	MACS_peak_2223	0.9725	0.742366	382.91
MACS_peak_2223	chr3-159547378-159547778	55.0571	1.73693	0.350478	chr3	159547322	159547822	MACS_peak_2223	1	0.8	chr3	159547310	159547834	MACS_peak_2223	1	0.763359	382.91
MACS_peak_2223	chr3-159547296-159547696	28.6963	1.3279	0.461564	chr3	159547322	159547822	MACS_peak_2223	0.935	0.748	chr3	159547310	159547834	MACS_peak_2223	0.965	0.736641	382.91
MACS_peak_2223	chr3-159547328-159547728	16.4635	-0.10516	0.970463	chr3	159547322	159547822	MACS_peak_2223	1	0.8	chr3	159547310	159547834	MACS_peak_2223	1	0.763359	382.91
MACS_peak_2224	chr3-161062640-161063040	213.822	-1.41226	0.444177	chr3	161062527	161063027	MACS_peak_2224	0.9675	0.774	chr3	161062551	161063002	MACS_peak_2224	0.905	0.802661	112.74
MACS_peak_2225	chr3-161063515-161063915	132.88	1.24341	0.396523	chr3	161063541	161064091	MACS_peak_2225	0.935	0.68	chr3	161063504	161064127	MACS_peak_2225	1	0.642055	189.38
MACS_peak_2225	chr3-161063514-161063914	15.3278	0.889247	0.684627	chr3	161063541	161064091	MACS_peak_2225	0.9325	0.678182	chr3	161063504	161064127	MACS_peak_2225	1	0.642055	189.38
MACS_peak_2225	chr3-161063516-161063916	25.6854	0.530479	0.832846	chr3	161063541	161064091	MACS_peak_2225	0.9375	0.681818	chr3	161063504	161064127	MACS_peak_2225	1	0.642055	189.38
MACS_peak_2225	chr3-161063493-161063893	107.251	-0.512869	0.789542	chr3	161063541	161064091	MACS_peak_2225	0.88	0.64	chr3	161063504	161064127	MACS_peak_2225	0.9725	0.624398	189.38
MACS_peak_2225	chr3-161063517-161063917	78.8573	-0.624252	0.719777	chr3	161063541	161064091	MACS_peak_2225	0.94	0.683636	chr3	161063504	161064127	MACS_peak_2225	1	0.642055	189.38
MACS_peak_2225	chr3-161063728-161064128	12.7845	-0.988399	0.571059	chr3	161063541	161064091	MACS_peak_2225	0.9075	0.66	chr3	161063504	161064127	MACS_peak_2225	0.9975	0.640449	189.38
MACS_peak_2225	chr3-161063492-161063892	24.0258	-1.43184	0.52235	chr3	161063541	161064091	MACS_peak_2225	0.8775	0.638182	chr3	161063504	161064127	MACS_peak_2225	0.97	0.622793	189.38
MACS_peak_2243	chr3-190875555-190875955	430.983	7.38058	3.96217e-09	chr3	190875352	190875852	MACS_peak_2243	0.7425	0.594	chr3	190875454	190875750	MACS_peak_2243	0.4875	0.658784	77.45
MACS_peak_2243	chr3-190875554-190875954	162.545	6.30162	8.19024e-06	chr3	190875352	190875852	MACS_peak_2243	0.745	0.596	chr3	190875454	190875750	MACS_peak_2243	0.49	0.662162	77.45
MACS_peak_2243	chr3-190875553-190875953	328.844	4.12948	0.0020091	chr3	190875352	190875852	MACS_peak_2243	0.7475	0.598	chr3	190875454	190875750	MACS_peak_2243	0.4925	0.665541	77.45
MACS_peak_2244	chr3-191245683-191246083	5.68544	0.0955583	0.970463	chr3	191245740	191246240	MACS_peak_2244	0.8575	0.686	chr3	191245870	191246110	MACS_peak_2244	0.5325	0.8875	64.88
MACS_peak_2249	chr3-192031291-192031691	7.00679	0.494279	0.863467	chr3	192031386	192031886	MACS_peak_2249	0.7625	0.61	chr3	192031518	192031754	MACS_peak_2249	0.4325	0.733051	65.48
MACS_peak_2249	chr3-192031290-192031690	47.989	0.141947	0.970463	chr3	192031386	192031886	MACS_peak_2249	0.76	0.608	chr3	192031518	192031754	MACS_peak_2249	0.43	0.728814	65.48
MACS_peak_2249	chr3-192031292-192031692	8.18829	-0.592671	0.830441	chr3	192031386	192031886	MACS_peak_2249	0.765	0.612	chr3	192031518	192031754	MACS_peak_2249	0.435	0.737288	65.48
MACS_peak_2251	chr3-193922269-193922669	26.4122	4.7117	0.0021627	chr3	193922355	193922855	MACS_peak_2251	0.785	0.628	chr3	193922434	193922776	MACS_peak_2251	0.5875	0.687135	68.95
MACS_peak_2255	chr3-194908434-194908834	11.8422	3.65224	0.0320832	chr3	194908247	194908747	MACS_peak_2255	0.7825	0.626	chr3	194908231	194908763	MACS_peak_2255	0.8225	0.618421	230.27
MACS_peak_2255	chr3-194908418-194908818	8.33164	3.40967	0.0534783	chr3	194908247	194908747	MACS_peak_2255	0.8225	0.658	chr3	194908231	194908763	MACS_peak_2255	0.8625	0.648496	230.27
MACS_peak_2255	chr3-194908416-194908816	42.4776	2.81301	0.0998561	chr3	194908247	194908747	MACS_peak_2255	0.8275	0.662	chr3	194908231	194908763	MACS_peak_2255	0.8675	0.652256	230.27
MACS_peak_2255	chr3-194908436-194908836	42.2675	2.69074	0.0534783	chr3	194908247	194908747	MACS_peak_2255	0.7775	0.622	chr3	194908231	194908763	MACS_peak_2255	0.8175	0.614662	230.27
MACS_peak_2255	chr3-194908357-194908757	21.7432	2.21719	0.137347	chr3	194908247	194908747	MACS_peak_2255	0.975	0.78	chr3	194908231	194908763	MACS_peak_2255	1	0.75188	230.27
MACS_peak_2255	chr3-194908355-194908755	23.8349	1.27114	0.458126	chr3	194908247	194908747	MACS_peak_2255	0.98	0.784	chr3	194908231	194908763	MACS_peak_2255	1	0.75188	230.27
MACS_peak_2255	chr3-194908356-194908756	11.6838	1.00056	0.585898	chr3	194908247	194908747	MACS_peak_2255	0.9775	0.782	chr3	194908231	194908763	MACS_peak_2255	1	0.75188	230.27
MACS_peak_2255	chr3-194908365-194908765	15.3278	0.889247	0.684627	chr3	194908247	194908747	MACS_peak_2255	0.955	0.764	chr3	194908231	194908763	MACS_peak_2255	0.995	0.74812	230.27
MACS_peak_2255	chr3-194908358-194908758	28.2825	0.534589	0.845293	chr3	194908247	194908747	MACS_peak_2255	0.9725	0.778	chr3	194908231	194908763	MACS_peak_2255	1	0.75188	230.27
MACS_peak_2258	chr3-196641034-196641434	10.838	3.99606	0.0142162	chr3	196640874	196641374	MACS_peak_2258	0.85	0.68	chr3	196641001	196641246	MACS_peak_2258	0.53	0.865306	64.14
MACS_peak_2258	chr3-196640832-196641232	11.8405	1.52605	0.385706	chr3	196640874	196641374	MACS_peak_2258	0.895	0.716	chr3	196641001	196641246	MACS_peak_2258	0.5775	0.942857	64.14
MACS_peak_2258	chr3-196640927-196641327	7.03011	0.574559	0.811886	chr3	196640874	196641374	MACS_peak_2258	1	0.8	chr3	196641001	196641246	MACS_peak_2258	0.6125	1	64.14
MACS_peak_2258	chr3-196641036-196641436	14.2992	-0.0219256	0.98917	chr3	196640874	196641374	MACS_peak_2258	0.845	0.676	chr3	196641001	196641246	MACS_peak_2258	0.525	0.857143	64.14
MACS_peak_2258	chr3-196640829-196641229	10.3423	-0.848097	0.64708	chr3	196640874	196641374	MACS_peak_2258	0.8875	0.71	chr3	196641001	196641246	MACS_peak_2258	0.57	0.930612	64.14
MACS_peak_2258	chr3-196640828-196641228	26.0483	-1.00235	0.694631	chr3	196640874	196641374	MACS_peak_2258	0.885	0.708	chr3	196641001	196641246	MACS_peak_2258	0.5675	0.926531	64.14
MACS_peak_2258	chr3-196640928-196641328	7.98068	-1.12308	0.534726	chr3	196640874	196641374	MACS_peak_2258	1	0.8	chr3	196641001	196641246	MACS_peak_2258	0.6125	1	64.14
MACS_peak_2258	chr3-196640929-196641329	12.8398	-1.4322	0.379026	chr3	196640874	196641374	MACS_peak_2258	1	0.8	chr3	196641001	196641246	MACS_peak_2258	0.6125	1	64.14
MACS_peak_2258	chr3-196640816-196641216	10.1654	-1.63769	0.326682	chr3	196640874	196641374	MACS_peak_2258	0.855	0.684	chr3	196641001	196641246	MACS_peak_2258	0.5375	0.877551	64.14
MACS_peak_2258	chr3-196640831-196641231	8.91716	-1.69987	0.284054	chr3	196640874	196641374	MACS_peak_2258	0.8925	0.714	chr3	196641001	196641246	MACS_peak_2258	0.575	0.938776	64.14
MACS_peak_2258	chr3-196640922-196641322	43.0614	-2.12522	0.191847	chr3	196640874	196641374	MACS_peak_2258	1	0.8	chr3	196641001	196641246	MACS_peak_2258	0.6125	1	64.14
MACS_peak_2258	chr3-196640921-196641321	20.3485	-2.71066	0.0991244	chr3	196640874	196641374	MACS_peak_2258	1	0.8	chr3	196641001	196641246	MACS_peak_2258	0.6125	1	64.14
MACS_peak_2258	chr3-196640815-196641215	5.69209	-2.87187	0.0994549	chr3	196640874	196641374	MACS_peak_2258	0.8525	0.682	chr3	196641001	196641246	MACS_peak_2258	0.535	0.873469	64.14
MACS_peak_2266	chr4-3584638-3585038	22.2062	1.28025	0.505055	chr4	3584487	3584987	MACS_peak_2266	0.8725	0.698	chr4	3584652	3584821	MACS_peak_2266	0.4225	1	65.52
MACS_peak_2266	chr4-3584641-3585041	13.6236	0.229353	0.960411	chr4	3584487	3584987	MACS_peak_2266	0.865	0.692	chr4	3584652	3584821	MACS_peak_2266	0.4225	1	65.52
MACS_peak_2266	chr4-3584573-3584973	14.3733	0.227945	0.940945	chr4	3584487	3584987	MACS_peak_2266	1	0.8	chr4	3584652	3584821	MACS_peak_2266	0.4225	1	65.52
MACS_peak_2266	chr4-3584639-3585039	76.2136	-0.215948	0.925573	chr4	3584487	3584987	MACS_peak_2266	0.87	0.696	chr4	3584652	3584821	MACS_peak_2266	0.4225	1	65.52
MACS_peak_2266	chr4-3584636-3585036	76.3366	-0.532123	0.846214	chr4	3584487	3584987	MACS_peak_2266	0.8775	0.702	chr4	3584652	3584821	MACS_peak_2266	0.4225	1	65.52
MACS_peak_2266	chr4-3584447-3584847	8.18829	-0.592671	0.830441	chr4	3584487	3584987	MACS_peak_2266	0.9	0.72	chr4	3584652	3584821	MACS_peak_2266	0.4225	1	65.52
MACS_peak_2266	chr4-3584358-3584758	5.89081	-0.798318	0.678878	chr4	3584487	3584987	MACS_peak_2266	0.6775	0.542	chr4	3584652	3584821	MACS_peak_2266	0.265	0.627219	65.52
MACS_peak_2266	chr4-3584637-3585037	23.1653	-0.802019	0.750006	chr4	3584487	3584987	MACS_peak_2266	0.875	0.7	chr4	3584652	3584821	MACS_peak_2266	0.4225	1	65.52
MACS_peak_2266	chr4-3584640-3585040	10.7041	-0.882838	0.616801	chr4	3584487	3584987	MACS_peak_2266	0.8675	0.694	chr4	3584652	3584821	MACS_peak_2266	0.4225	1	65.52
MACS_peak_2266	chr4-3584446-3584846	18.9467	-0.88506	0.623116	chr4	3584487	3584987	MACS_peak_2266	0.8975	0.718	chr4	3584652	3584821	MACS_peak_2266	0.4225	1	65.52
MACS_peak_2269	chr4-5914413-5914813	287.278	2.47182	0.0325669	chr4	5914265	5914765	MACS_peak_2269	0.88	0.704	chr4	5914325	5914704	MACS_peak_2269	0.7275	0.76781	96.34
MACS_peak_2269	chr4-5914415-5914815	162.055	2.87629	0.0534783	chr4	5914265	5914765	MACS_peak_2269	0.875	0.7	chr4	5914325	5914704	MACS_peak_2269	0.7225	0.762533	96.34
MACS_peak_2269	chr4-5914414-5914814	252.893	2.63028	0.0809113	chr4	5914265	5914765	MACS_peak_2269	0.8775	0.702	chr4	5914325	5914704	MACS_peak_2269	0.725	0.765172	96.34
MACS_peak_2269	chr4-5914412-5914812	590.038	2.16748	0.0534783	chr4	5914265	5914765	MACS_peak_2269	0.8825	0.706	chr4	5914325	5914704	MACS_peak_2269	0.73	0.770449	96.34
MACS_peak_2269	chr4-5914206-5914606	22.6318	1.49649	0.411891	chr4	5914265	5914765	MACS_peak_2269	0.8525	0.682	chr4	5914325	5914704	MACS_peak_2269	0.7025	0.741425	96.34
MACS_peak_2269	chr4-5914205-5914605	17.5764	1.41639	0.393928	chr4	5914265	5914765	MACS_peak_2269	0.85	0.68	chr4	5914325	5914704	MACS_peak_2269	0.7	0.738786	96.34
MACS_peak_2269	chr4-5914204-5914604	15.3953	1.12754	0.518948	chr4	5914265	5914765	MACS_peak_2269	0.8475	0.678	chr4	5914325	5914704	MACS_peak_2269	0.6975	0.736148	96.34
MACS_peak_2269	chr4-5914203-5914603	17.092	0.343248	0.883602	chr4	5914265	5914765	MACS_peak_2269	0.845	0.676	chr4	5914325	5914704	MACS_peak_2269	0.695	0.733509	96.34
MACS_peak_2269	chr4-5914208-5914608	8.18829	-0.592671	0.830441	chr4	5914265	5914765	MACS_peak_2269	0.8575	0.686	chr4	5914325	5914704	MACS_peak_2269	0.7075	0.746702	96.34
MACS_peak_2270	chr4-6643773-6644173	12.437	-4.04268	0.0142442	chr4	6643867	6644367	MACS_peak_2270	0.765	0.612	chr4	6643845	6644388	MACS_peak_2270	0.82	0.604052	141.62
MACS_peak_2270	chr4-6643774-6644174	10.435	3.12894	0.0680769	chr4	6643867	6644367	MACS_peak_2270	0.7675	0.614	chr4	6643845	6644388	MACS_peak_2270	0.8225	0.605893	141.62
MACS_peak_2270	chr4-6643772-6644172	7.63787	-0.678342	0.734289	chr4	6643867	6644367	MACS_peak_2270	0.7625	0.61	chr4	6643845	6644388	MACS_peak_2270	0.8175	0.60221	141.62
MACS_peak_2275	chr4-8065537-8065937	64.1741	5.00356	0.000718692	chr4	8065362	8065862	MACS_peak_2275	0.8125	0.65	chr4	8065411	8065812	MACS_peak_2275	0.6875	0.685786	89.79
MACS_peak_2275	chr4-8065538-8065938	41.0398	4.30231	0.00251797	chr4	8065362	8065862	MACS_peak_2275	0.81	0.648	chr4	8065411	8065812	MACS_peak_2275	0.685	0.683292	89.79
MACS_peak_2275	chr4-8065540-8065940	26.9322	3.41892	0.025528	chr4	8065362	8065862	MACS_peak_2275	0.805	0.644	chr4	8065411	8065812	MACS_peak_2275	0.68	0.678304	89.79
MACS_peak_2275	chr4-8065569-8065969	11.1498	2.95881	0.0544011	chr4	8065362	8065862	MACS_peak_2275	0.7325	0.586	chr4	8065411	8065812	MACS_peak_2275	0.6075	0.605985	89.79
MACS_peak_2275	chr4-8065539-8065939	11.6899	2.45309	0.0994549	chr4	8065362	8065862	MACS_peak_2275	0.8075	0.646	chr4	8065411	8065812	MACS_peak_2275	0.6825	0.680798	89.79
MACS_peak_2275	chr4-8065567-8065967	9.81381	2.24678	0.13633	chr4	8065362	8065862	MACS_peak_2275	0.7375	0.59	chr4	8065411	8065812	MACS_peak_2275	0.6125	0.610973	89.79
MACS_peak_2280	chr4-12859589-12859989	5.97333	-0.23613	0.958364	chr4	12859459	12859959	MACS_peak_2280	0.925	0.74	chr4	12859609	12859809	MACS_peak_2280	0.5	1	60.42
MACS_peak_2280	chr4-12859587-12859987	11.8937	-1.31772	0.49377	chr4	12859459	12859959	MACS_peak_2280	0.93	0.744	chr4	12859609	12859809	MACS_peak_2280	0.5	1	60.42
MACS_peak_2282	chr4-15002828-15003228	103.955	2.87122	0.0642528	chr4	15002685	15003185	MACS_peak_2282	0.8925	0.714	chr4	15002775	15003094	MACS_peak_2282	0.665	0.833856	62.98
MACS_peak_2282	chr4-15002862-15003262	52.1689	2.66889	0.0845557	chr4	15002685	15003185	MACS_peak_2282	0.8075	0.646	chr4	15002775	15003094	MACS_peak_2282	0.58	0.727273	62.98
MACS_peak_2288	chr4-24864996-24865396	240.263	7.10169	9.27625e-09							chr4	24865274	24865458	MACS_peak_2288	0.305	0.663043	63.1
MACS_peak_2288	chr4-24865126-24865526	254.552	3.15146	0.00698588							chr4	24865274	24865458	MACS_peak_2288	0.46	1	63.1
MACS_peak_2288	chr4-24864997-24865397	10.4385	2.08764	0.291887							chr4	24865274	24865458	MACS_peak_2288	0.3075	0.668478	63.1
MACS_peak_2291	chr4-28353632-28354032	5.81528	1.59546	0.444703	chr4	28353505	28354005	MACS_peak_2291	0.9325	0.746	chr4	28353578	28353932	MACS_peak_2291	0.75	0.847458	63.71
MACS_peak_2291	chr4-28353415-28353815	17.1435	0.101685	0.970463	chr4	28353505	28354005	MACS_peak_2291	0.775	0.62	chr4	28353578	28353932	MACS_peak_2291	0.5925	0.669492	63.71
MACS_peak_2291	chr4-28353663-28354063	13.4753	-0.246895	0.958471	chr4	28353505	28354005	MACS_peak_2291	0.855	0.684	chr4	28353578	28353932	MACS_peak_2291	0.6725	0.759887	63.71
MACS_peak_2291	chr4-28353413-28353813	9.27388	-0.669646	0.767844	chr4	28353505	28354005	MACS_peak_2291	0.77	0.616	chr4	28353578	28353932	MACS_peak_2291	0.5875	0.663842	63.71
MACS_peak_2291	chr4-28353661-28354061	14.2584	-1.23855	0.450977	chr4	28353505	28354005	MACS_peak_2291	0.86	0.688	chr4	28353578	28353932	MACS_peak_2291	0.6775	0.765537	63.71
MACS_peak_2292	chr4-31236163-31236563	126.953	6.19067	4.48688e-06	chr4	31236141	31236641	MACS_peak_2292	1	0.8	chr4	31236212	31236570	MACS_peak_2292	0.8775	0.980447	110.22
MACS_peak_2292	chr4-31236165-31236565	471.833	3.49771	0.0188501	chr4	31236141	31236641	MACS_peak_2292	1	0.8	chr4	31236212	31236570	MACS_peak_2292	0.8825	0.986034	110.22
MACS_peak_2292	chr4-31236296-31236696	97.0089	2.84052	0.0315483	chr4	31236141	31236641	MACS_peak_2292	0.8625	0.69	chr4	31236212	31236570	MACS_peak_2292	0.685	0.765363	110.22
MACS_peak_2292	chr4-31236295-31236695	13.1628	1.81087	0.262483	chr4	31236141	31236641	MACS_peak_2292	0.865	0.692	chr4	31236212	31236570	MACS_peak_2292	0.6875	0.768156	110.22
MACS_peak_2292	chr4-31236294-31236694	5.86505	0.708059	0.738457	chr4	31236141	31236641	MACS_peak_2292	0.8675	0.694	chr4	31236212	31236570	MACS_peak_2292	0.69	0.77095	110.22
MACS_peak_2295	chr4-33748708-33749108	8.21642	2.62364	0.0994549	chr4	33748626	33749126	MACS_peak_2295	1	0.8	chr4	33748601	33749151	MACS_peak_2295	1	0.727273	232.41
MACS_peak_2295	chr4-33748709-33749109	18.7416	2.35542	0.122208	chr4	33748626	33749126	MACS_peak_2295	1	0.8	chr4	33748601	33749151	MACS_peak_2295	1	0.727273	232.41
MACS_peak_2295	chr4-33748710-33749110	18.7447	1.99956	0.208803	chr4	33748626	33749126	MACS_peak_2295	1	0.8	chr4	33748601	33749151	MACS_peak_2295	1	0.727273	232.41
MACS_peak_2295	chr4-33748711-33749111	24.4355	1.20384	0.45091	chr4	33748626	33749126	MACS_peak_2295	1	0.8	chr4	33748601	33749151	MACS_peak_2295	1	0.727273	232.41
MACS_peak_2296	chr4-35502549-35502949	32.3001	4.72035	0.00196554	chr4	35502367	35502867	MACS_peak_2296	0.795	0.636	chr4	35502490	35502744	MACS_peak_2296	0.4875	0.767717	73.31
MACS_peak_2296	chr4-35502310-35502710	15.2612	4.07509	0.0298645	chr4	35502367	35502867	MACS_peak_2296	0.8575	0.686	chr4	35502490	35502744	MACS_peak_2296	0.55	0.866142	73.31
MACS_peak_2296	chr4-35502368-35502768	28.7673	3.0596	0.0534783	chr4	35502367	35502867	MACS_peak_2296	1	0.8	chr4	35502490	35502744	MACS_peak_2296	0.635	1	73.31
MACS_peak_2296	chr4-35502243-35502643	17.7435	2.98175	0.100464	chr4	35502367	35502867	MACS_peak_2296	0.69	0.552	chr4	35502490	35502744	MACS_peak_2296	0.3825	0.602362	73.31
MACS_peak_2296	chr4-35502550-35502950	27.436	2.95591	0.0575555	chr4	35502367	35502867	MACS_peak_2296	0.7925	0.634	chr4	35502490	35502744	MACS_peak_2296	0.485	0.76378	73.31
MACS_peak_2296	chr4-35502311-35502711	26.381	2.73238	0.0926261	chr4	35502367	35502867	MACS_peak_2296	0.86	0.688	chr4	35502490	35502744	MACS_peak_2296	0.5525	0.870079	73.31
MACS_peak_2296	chr4-35502312-35502712	15.865	2.28514	0.135272	chr4	35502367	35502867	MACS_peak_2296	0.8625	0.69	chr4	35502490	35502744	MACS_peak_2296	0.555	0.874016	73.31
MACS_peak_2296	chr4-35502367-35502767	6.93862	1.56132	0.462727	chr4	35502367	35502867	MACS_peak_2296	1	0.8	chr4	35502490	35502744	MACS_peak_2296	0.635	1	73.31
MACS_peak_2296	chr4-35502552-35502952	34.695	1.26441	0.479194	chr4	35502367	35502867	MACS_peak_2296	0.7875	0.63	chr4	35502490	35502744	MACS_peak_2296	0.48	0.755906	73.31
MACS_peak_2296	chr4-35502551-35502951	16.3107	1.23071	0.496172	chr4	35502367	35502867	MACS_peak_2296	0.79	0.632	chr4	35502490	35502744	MACS_peak_2296	0.4825	0.759843	73.31
MACS_peak_2296	chr4-35502313-35502713	34.4786	0.977569	0.59763	chr4	35502367	35502867	MACS_peak_2296	0.865	0.692	chr4	35502490	35502744	MACS_peak_2296	0.5575	0.877953	73.31
MACS_peak_2296	chr4-35502370-35502770	29.1154	0.580507	0.812299	chr4	35502367	35502867	MACS_peak_2296	1	0.8	chr4	35502490	35502744	MACS_peak_2296	0.635	1	73.31
MACS_peak_2296	chr4-35502254-35502654	5.62781	0.441845	0.861477	chr4	35502367	35502867	MACS_peak_2296	0.7175	0.574	chr4	35502490	35502744	MACS_peak_2296	0.41	0.645669	73.31
MACS_peak_2296	chr4-35502369-35502769	12.6321	0.250629	0.942076	chr4	35502367	35502867	MACS_peak_2296	1	0.8	chr4	35502490	35502744	MACS_peak_2296	0.635	1	73.31
MACS_peak_2302	chr4-41146849-41147249	5.69209	-2.87187	0.0994549	chr4	41146778	41147278	MACS_peak_2302	1	0.8	chr4	41146931	41147125	MACS_peak_2302	0.485	1	97.72
MACS_peak_2303	chr4-42325853-42326253	14.4624	3.54005	0.0285362	chr4	42325693	42326193	MACS_peak_2303	0.85	0.68	chr4	42325777	42326109	MACS_peak_2303	0.64	0.771084	103.72
MACS_peak_2303	chr4-42325589-42325989	23.4746	-4.93247	0.000918273	chr4	42325693	42326193	MACS_peak_2303	0.74	0.592	chr4	42325777	42326109	MACS_peak_2303	0.53	0.638554	103.72
MACS_peak_2303	chr4-42325854-42326254	9.19615	3.21043	0.0621758	chr4	42325693	42326193	MACS_peak_2303	0.8475	0.678	chr4	42325777	42326109	MACS_peak_2303	0.6375	0.768072	103.72
MACS_peak_2303	chr4-42325825-42326225	13.2592	2.34809	0.125256	chr4	42325693	42326193	MACS_peak_2303	0.92	0.736	chr4	42325777	42326109	MACS_peak_2303	0.71	0.855422	103.72
MACS_peak_2303	chr4-42325758-42326158	12.4887	2.1324	0.232592	chr4	42325693	42326193	MACS_peak_2303	1	0.8	chr4	42325777	42326109	MACS_peak_2303	0.83	1	103.72
MACS_peak_2303	chr4-42325588-42325988	11.3534	1.17677	0.567432	chr4	42325693	42326193	MACS_peak_2303	0.7375	0.59	chr4	42325777	42326109	MACS_peak_2303	0.5275	0.635542	103.72
MACS_peak_2303	chr4-42325823-42326223	15.242	0.909092	0.619938	chr4	42325693	42326193	MACS_peak_2303	0.925	0.74	chr4	42325777	42326109	MACS_peak_2303	0.715	0.861446	103.72
MACS_peak_2303	chr4-42325759-42326159	13.5286	0.851852	0.645482	chr4	42325693	42326193	MACS_peak_2303	1	0.8	chr4	42325777	42326109	MACS_peak_2303	0.83	1	103.72
MACS_peak_2303	chr4-42325855-42326255	21.3578	0.847601	0.66858	chr4	42325693	42326193	MACS_peak_2303	0.845	0.676	chr4	42325777	42326109	MACS_peak_2303	0.635	0.76506	103.72
MACS_peak_2303	chr4-42325826-42326226	18.9261	0.718437	0.788296	chr4	42325693	42326193	MACS_peak_2303	0.9175	0.734	chr4	42325777	42326109	MACS_peak_2303	0.7075	0.85241	103.72
MACS_peak_2303	chr4-42325760-42326160	11.2245	0.0908631	0.970463	chr4	42325693	42326193	MACS_peak_2303	1	0.8	chr4	42325777	42326109	MACS_peak_2303	0.83	1	103.72
MACS_peak_2303	chr4-42325761-42326161	16.0662	0.00566985	0.997762	chr4	42325693	42326193	MACS_peak_2303	1	0.8	chr4	42325777	42326109	MACS_peak_2303	0.83	1	103.72
MACS_peak_2303	chr4-42325590-42325990	19.9245	-2.34712	0.0994549	chr4	42325693	42326193	MACS_peak_2303	0.7425	0.594	chr4	42325777	42326109	MACS_peak_2303	0.5325	0.641566	103.72
MACS_peak_2306	chr4-47361184-47361584	7.891	-0.846852	0.641892	chr4	47361019	47361519	MACS_peak_2306	0.8375	0.67	chr4	47361173	47361365	MACS_peak_2306	0.4525	0.942708	60.84
MACS_peak_2310	chr4-53579658-53580058	6180.46	-0.749663	0.511871	chr4	53579677	53580177	MACS_peak_2310	0.9525	0.762	chr4	53579747	53580107	MACS_peak_2310	0.7775	0.863889	96.73
MACS_peak_2316	chr4-57325701-57326101	17.8588	-4.15035	0.0271427	chr4	57325689	57326189	MACS_peak_2316	1	0.8	chr4	57325820	57326057	MACS_peak_2316	0.5925	1	76.08
MACS_peak_2316	chr4-57325579-57325979	11.0641	1.87259	0.26531	chr4	57325689	57326189	MACS_peak_2316	0.725	0.58	chr4	57325820	57326057	MACS_peak_2316	0.3975	0.670886	76.08
MACS_peak_2316	chr4-57325580-57325980	9.33585	0.888674	0.692152	chr4	57325689	57326189	MACS_peak_2316	0.7275	0.582	chr4	57325820	57326057	MACS_peak_2316	0.4	0.675105	76.08
MACS_peak_2316	chr4-57325581-57325981	15.0366	-0.11708	0.970463	chr4	57325689	57326189	MACS_peak_2316	0.73	0.584	chr4	57325820	57326057	MACS_peak_2316	0.4025	0.679325	76.08
MACS_peak_2316	chr4-57325618-57326018	6.78807	-1.17118	0.524726	chr4	57325689	57326189	MACS_peak_2316	0.8225	0.658	chr4	57325820	57326057	MACS_peak_2316	0.495	0.835443	76.08
MACS_peak_2316	chr4-57325647-57326047	12.8989	-1.34465	0.414233	chr4	57325689	57326189	MACS_peak_2316	0.895	0.716	chr4	57325820	57326057	MACS_peak_2316	0.5675	0.957806	76.08
MACS_peak_2316	chr4-57325615-57326015	5.68194	-2.84766	0.0994549	chr4	57325689	57326189	MACS_peak_2316	0.815	0.652	chr4	57325820	57326057	MACS_peak_2316	0.4875	0.822785	76.08
MACS_peak_2316	chr4-57325577-57325977	5.68194	-2.84766	0.0994549	chr4	57325689	57326189	MACS_peak_2316	0.72	0.576	chr4	57325820	57326057	MACS_peak_2316	0.3925	0.662447	76.08
MACS_peak_2322	chr4-65156470-65156870	6.23063	0.888977	0.633631	chr4	65156261	65156761	MACS_peak_2322	0.7275	0.582	chr4	65156410	65156612	MACS_peak_2322	0.355	0.70297	60.1
MACS_peak_2322	chr4-65156468-65156868	30.6312	-0.461907	0.830441	chr4	65156261	65156761	MACS_peak_2322	0.7325	0.586	chr4	65156410	65156612	MACS_peak_2322	0.36	0.712871	60.1
MACS_peak_2322	chr4-65156469-65156869	25.7548	-0.583223	0.789105	chr4	65156261	65156761	MACS_peak_2322	0.73	0.584	chr4	65156410	65156612	MACS_peak_2322	0.3575	0.707921	60.1
MACS_peak_2322	chr4-65156471-65156871	9.79276	-0.633349	0.756731	chr4	65156261	65156761	MACS_peak_2322	0.725	0.58	chr4	65156410	65156612	MACS_peak_2322	0.3525	0.69802	60.1
MACS_peak_2326	chr4-71566863-71567263	2857.25	-0.577839	0.809934	chr4	71566950	71567450	MACS_peak_2326	0.7825	0.626	chr4	71566987	71567412	MACS_peak_2326	0.69	0.649412	153.7
MACS_peak_2328	chr4-71698702-71699102	26.4911	1.14306	0.644316	chr4	71698699	71699199	MACS_peak_2328	1	0.8	chr4	71698879	71699019	MACS_peak_2328	0.35	1	76.07
MACS_peak_2328	chr4-71698705-71699105	13.4703	0.303388	0.909447	chr4	71698699	71699199	MACS_peak_2328	1	0.8	chr4	71698879	71699019	MACS_peak_2328	0.35	1	76.07
MACS_peak_2328	chr4-71698703-71699103	6.98519	0.226688	0.963034	chr4	71698699	71699199	MACS_peak_2328	1	0.8	chr4	71698879	71699019	MACS_peak_2328	0.35	1	76.07
MACS_peak_2328	chr4-71698763-71699163	8.38992	-1.79438	0.263856	chr4	71698699	71699199	MACS_peak_2328	1	0.8	chr4	71698879	71699019	MACS_peak_2328	0.35	1	76.07
MACS_peak_2328	chr4-71698761-71699161	6.21897	-2.35801	0.125972	chr4	71698699	71699199	MACS_peak_2328	1	0.8	chr4	71698879	71699019	MACS_peak_2328	0.35	1	76.07
MACS_peak_2331	chr4-75811639-75812039	2988.86	4.90207	0.0220097	chr4	75811687	75812187	MACS_peak_2331	0.88	0.704	chr4	75811683	75812191	MACS_peak_2331	0.89	0.700787	210.95
MACS_peak_2331	chr4-75811724-75812124	29.3764	3.87093	0.0327148	chr4	75811687	75812187	MACS_peak_2331	1	0.8	chr4	75811683	75812191	MACS_peak_2331	1	0.787402	210.95
MACS_peak_2331	chr4-75811725-75812125	10.3893	2.604	0.124549	chr4	75811687	75812187	MACS_peak_2331	1	0.8	chr4	75811683	75812191	MACS_peak_2331	1	0.787402	210.95
MACS_peak_2331	chr4-75811726-75812126	25.6988	2.0707	0.200041	chr4	75811687	75812187	MACS_peak_2331	1	0.8	chr4	75811683	75812191	MACS_peak_2331	1	0.787402	210.95
MACS_peak_2331	chr4-75811721-75812121	52.0292	1.79085	0.298004	chr4	75811687	75812187	MACS_peak_2331	1	0.8	chr4	75811683	75812191	MACS_peak_2331	1	0.787402	210.95
MACS_peak_2331	chr4-75811728-75812128	31.571	1.65698	0.275873	chr4	75811687	75812187	MACS_peak_2331	1	0.8	chr4	75811683	75812191	MACS_peak_2331	1	0.787402	210.95
MACS_peak_2331	chr4-75811718-75812118	26.7508	1.41886	0.507892	chr4	75811687	75812187	MACS_peak_2331	1	0.8	chr4	75811683	75812191	MACS_peak_2331	1	0.787402	210.95
MACS_peak_2331	chr4-75811720-75812120	10.9148	1.25288	0.557187	chr4	75811687	75812187	MACS_peak_2331	1	0.8	chr4	75811683	75812191	MACS_peak_2331	1	0.787402	210.95
MACS_peak_2331	chr4-75811719-75812119	27.3213	1.13808	0.512854	chr4	75811687	75812187	MACS_peak_2331	1	0.8	chr4	75811683	75812191	MACS_peak_2331	1	0.787402	210.95
MACS_peak_2331	chr4-75811727-75812127	11.5044	-0.086834	0.970463	chr4	75811687	75812187	MACS_peak_2331	1	0.8	chr4	75811683	75812191	MACS_peak_2331	1	0.787402	210.95
MACS_peak_2333	chr4-77703024-77703424	17.7676	4.55809	0.00531372	chr4	77703052	77703652	MACS_peak_2333	0.93	0.62	chr4	77703021	77703683	MACS_peak_2333	1	0.60423	231.86
MACS_peak_2333	chr4-77703023-77703423	10.838	3.99606	0.0142162	chr4	77703052	77703652	MACS_peak_2333	0.9275	0.618333	chr4	77703021	77703683	MACS_peak_2333	1	0.60423	231.86
MACS_peak_2333	chr4-77703021-77703421	16.3948	3.44582	0.0614298	chr4	77703052	77703652	MACS_peak_2333	0.9225	0.615	chr4	77703021	77703683	MACS_peak_2333	1	0.60423	231.86
MACS_peak_2333	chr4-77703022-77703422	35.8211	3.30353	0.0534783	chr4	77703052	77703652	MACS_peak_2333	0.925	0.616667	chr4	77703021	77703683	MACS_peak_2333	1	0.60423	231.86
MACS_peak_2333	chr4-77703020-77703420	55.9466	2.50352	0.0764186	chr4	77703052	77703652	MACS_peak_2333	0.92	0.613333	chr4	77703021	77703683	MACS_peak_2333	0.9975	0.602719	231.86
MACS_peak_2335	chr4-78264969-78265369	8.33164	3.40967	0.0534783	chr4	78264885	78265385	MACS_peak_2335	1	0.8	chr4	78265021	78265248	MACS_peak_2335	0.5675	1	77.81
MACS_peak_2335	chr4-78264968-78265368	14.5037	1.86385	0.248105	chr4	78264885	78265385	MACS_peak_2335	1	0.8	chr4	78265021	78265248	MACS_peak_2335	0.5675	1	77.81
MACS_peak_2335	chr4-78264966-78265366	18.4812	1.55127	0.334346	chr4	78264885	78265385	MACS_peak_2335	1	0.8	chr4	78265021	78265248	MACS_peak_2335	0.5675	1	77.81
[truncated: 3,417 more rows]

## Sheet: positive_regions
		baseMean	log2FoldChange	padj	chr	start	stop	name	overlap-region	overlap-design	chr	start	stop	name	overlap-region	overlap-ChIP	peakscore
MACS_peak_1003	chr15-31442739-31443139	173.487	6.25869	1.56477e-07							chr15	31442891	31443264	MACS_peak_1003	0.62	0.664879	145.09
MACS_peak_1004	chr15-33437680-33438080	140.465	3.80365	0.00562275	chr15	33437674	33438174	MACS_peak_1004	1	0.8	chr15	33437692	33438155	MACS_peak_1004	0.97	0.838013	189.31
MACS_peak_1004	chr15-33437681-33438081	66.3813	3.01674	0.0372547	chr15	33437674	33438174	MACS_peak_1004	1	0.8	chr15	33437692	33438155	MACS_peak_1004	0.9725	0.840173	189.31
MACS_peak_1004	chr15-33437682-33438082	275.583	2.73954	0.0246248	chr15	33437674	33438174	MACS_peak_1004	1	0.8	chr15	33437692	33438155	MACS_peak_1004	0.975	0.842333	189.31
MACS_peak_1025	chr15-52156485-52156885	56.9822	4.70917	0.000983232	chr15	52156494	52157044	MACS_peak_1025	0.9775	0.710909	chr15	52156465	52157073	MACS_peak_1025	1	0.657895	169.77
MACS_peak_1025	chr15-52156643-52157043	33.6341	4.19944	0.0217686	chr15	52156494	52157044	MACS_peak_1025	1	0.727273	chr15	52156465	52157073	MACS_peak_1025	1	0.657895	169.77
MACS_peak_1053	chr15-56497168-56497568	86.011	6.11639	6.22581e-07	chr15	56497151	56497651	MACS_peak_1053	1	0.8	chr15	56497195	56497606	MACS_peak_1053	0.9325	0.907543	138.49
MACS_peak_1053	chr15-56497192-56497592	29.0009	4.35782	0.00562275	chr15	56497151	56497651	MACS_peak_1053	1	0.8	chr15	56497195	56497606	MACS_peak_1053	0.9925	0.965937	138.49
MACS_peak_1053	chr15-56497321-56497721	833.084	2.61787	0.0157572	chr15	56497151	56497651	MACS_peak_1053	0.825	0.66	chr15	56497195	56497606	MACS_peak_1053	0.7125	0.693431	138.49
MACS_peak_1059	chr15-56922761-56923161	166.299	4.10356	0.000666307	chr15	56922700	56923200	MACS_peak_1059	1	0.8	chr15	56922717	56923182	MACS_peak_1059	1	0.860215	137.74
MACS_peak_109	chr1-111756853-111757253	134.91	6.50634	4.05281e-08	chr1	111756838	111757338	MACS_peak_109	1	0.8	chr1	111757005	111757171	MACS_peak_109	0.415	1	74.77
MACS_peak_109	chr1-111756851-111757251	258.409	2.91782	0.0421454	chr1	111756838	111757338	MACS_peak_109	1	0.8	chr1	111757005	111757171	MACS_peak_109	0.415	1	74.77
MACS_peak_1093	chr15-80777641-80778041	15.3313	3.63715	0.0421454	chr15	80777552	80778052	MACS_peak_1093	1	0.8	chr15	80777526	80778078	MACS_peak_1093	1	0.724638	96.26
MACS_peak_1093	chr15-80777639-80778039	25.0232	3.49757	0.029172	chr15	80777552	80778052	MACS_peak_1093	1	0.8	chr15	80777526	80778078	MACS_peak_1093	1	0.724638	96.26
MACS_peak_110	chr1-111757192-111757592	10.838	3.99606	0.0142162	chr1	111756838	111757338	MACS_peak_109	0.365	0.292	chr1	111757216	111757428	MACS_peak_110	0.53	1	54.47
MACS_peak_110	chr1-111757193-111757593	71.4435	3.55361	0.00826739	chr1	111756838	111757338	MACS_peak_109	0.3625	0.29	chr1	111757216	111757428	MACS_peak_110	0.53	1	54.47
MACS_peak_1102	chr15-93492931-93493331	116.833	5.909	0.000200517	chr15	93493032	93493532	MACS_peak_1102	0.7475	0.598	chr15	93493078	93493485	MACS_peak_1102	0.6325	0.621622	105.02
MACS_peak_1102	chr15-93493120-93493520	39.7352	4.66224	0.00330399	chr15	93493032	93493532	MACS_peak_1102	1	0.8	chr15	93493078	93493485	MACS_peak_1102	0.9125	0.896806	105.02
MACS_peak_1102	chr15-93493121-93493521	29.0009	4.35782	0.00562275	chr15	93493032	93493532	MACS_peak_1102	1	0.8	chr15	93493078	93493485	MACS_peak_1102	0.91	0.894349	105.02
MACS_peak_1102	chr15-93493187-93493587	59.1605	2.76947	0.0495916	chr15	93493032	93493532	MACS_peak_1102	0.8625	0.69	chr15	93493078	93493485	MACS_peak_1102	0.745	0.732187	105.02
MACS_peak_112	chr1-111907471-111907871	31.6471	4.43529	0.0133198	chr1	111907528	111908028	MACS_peak_112	0.8575	0.686	chr1	111907511	111908045	MACS_peak_112	0.9	0.674157	209.95
MACS_peak_112	chr1-111907475-111907875	41.4567	3.3584	0.0236728	chr1	111907528	111908028	MACS_peak_112	0.8675	0.694	chr1	111907511	111908045	MACS_peak_112	0.91	0.681648	209.95
MACS_peak_1127	chr16-5455864-5456264	15.6717	4.53278	0.00302908	chr16	5455671	5456171	MACS_peak_1127	0.7675	0.614	chr16	5455749	5456093	MACS_peak_1127	0.5725	0.665698	170.39
MACS_peak_1141	chr16-24393057-24393457	82.6385	5.50668	2.68761e-05	chr16	24392956	24393456	MACS_peak_1141	0.9975	0.798	chr16	24393083	24393329	MACS_peak_1141	0.615	1	64
MACS_peak_1141	chr16-24393002-24393402	103.569	4.95887	1.07859e-05	chr16	24392956	24393456	MACS_peak_1141	1	0.8	chr16	24393083	24393329	MACS_peak_1141	0.615	1	64
MACS_peak_1141	chr16-24393059-24393459	31.55	3.82374	0.0216191	chr16	24392956	24393456	MACS_peak_1141	0.9925	0.794	chr16	24393083	24393329	MACS_peak_1141	0.615	1	64
MACS_peak_1141	chr16-24393021-24393421	64.4628	3.82344	0.0029239	chr16	24392956	24393456	MACS_peak_1141	1	0.8	chr16	24393083	24393329	MACS_peak_1141	0.615	1	64
MACS_peak_1141	chr16-24393058-24393458	74.6487	3.77392	0.00348329	chr16	24392956	24393456	MACS_peak_1141	0.995	0.796	chr16	24393083	24393329	MACS_peak_1141	0.615	1	64
MACS_peak_1141	chr16-24392974-24393374	72.64	3.2418	0.0217867	chr16	24392956	24393456	MACS_peak_1141	1	0.8	chr16	24393083	24393329	MACS_peak_1141	0.615	1	64
MACS_peak_1141	chr16-24393020-24393420	35.8577	3.05777	0.0420113	chr16	24392956	24393456	MACS_peak_1141	1	0.8	chr16	24393083	24393329	MACS_peak_1141	0.615	1	64
MACS_peak_1142	chr16-25565140-25565540	52.7469	5.44175	0.000144465	chr16	25564987	25565487	MACS_peak_1142	0.8675	0.694	chr16	25564937	25565537	MACS_peak_1142	0.9925	0.661667	231.82
MACS_peak_1142	chr16-25565089-25565489	36.54	4.80134	0.00554993	chr16	25564987	25565487	MACS_peak_1142	0.995	0.796	chr16	25564937	25565537	MACS_peak_1142	1	0.666667	231.82
MACS_peak_1143	chr16-25580226-25580626	346.053	4.76565	0.000328216							chr16	25580363	25580582	MACS_peak_1143	0.5475	1	90.5
MACS_peak_1143	chr16-25580228-25580628	597.517	4.31259	1.31075e-05							chr16	25580363	25580582	MACS_peak_1143	0.5475	1	90.5
MACS_peak_1143	chr16-25580262-25580662	23.3453	4.28564	0.00525708							chr16	25580363	25580582	MACS_peak_1143	0.5475	1	90.5
MACS_peak_1143	chr16-25580227-25580627	148.693	2.62359	0.0312105							chr16	25580363	25580582	MACS_peak_1143	0.5475	1	90.5
MACS_peak_116	chr1-114878926-114879326	1221.52	8.34836	1.35585e-15	chr1	114878864	114879364	MACS_peak_116	1	0.8	chr1	114878869	114879358	MACS_peak_116	1	0.817996	78.08
MACS_peak_116	chr1-114878924-114879324	22.201	3.95548	0.0424272	chr1	114878864	114879364	MACS_peak_116	1	0.8	chr1	114878869	114879358	MACS_peak_116	1	0.817996	78.08
MACS_peak_1163	chr16-60022425-60022825	113.686	4.38741	0.00121946	chr16	60022458	60022958	MACS_peak_1163	0.9175	0.734	chr16	60022498	60022918	MACS_peak_1163	0.8175	0.778571	111.01
MACS_peak_1164	chr16-64471723-64472123	561.461	8.70256	5.08605e-11	chr16	64471515	64472015	MACS_peak_1164	0.73	0.584	chr16	64471607	64471922	MACS_peak_1164	0.4975	0.631746	85.05
MACS_peak_1164	chr16-64471676-64472076	723.886	3.4605	0.00562275	chr16	64471515	64472015	MACS_peak_1164	0.8475	0.678	chr16	64471607	64471922	MACS_peak_1164	0.615	0.780952	85.05
MACS_peak_1166	chr16-65802888-65803288	51.1871	3.42835	0.0306017	chr16	65802860	65803360	MACS_peak_1166	1	0.8	chr16	65802851	65803368	MACS_peak_1166	1	0.773694	170.33
MACS_peak_118	chr1-115272925-115273325	11.9014	3.80841	0.0451282	chr1	115272887	115273387	MACS_peak_118	1	0.8	chr1	115272851	115273422	MACS_peak_118	1	0.700525	84.19
MACS_peak_1184	chr16-72249501-72249901	17.7676	4.55809	0.00531372	chr16	72249587	72250087	MACS_peak_1184	0.785	0.628	chr16	72249702	72249972	MACS_peak_1184	0.4975	0.737037	67.08
MACS_peak_1196	chr16-74288196-74288596	10.838	3.99606	0.0142162	chr16	74288220	74288720	MACS_peak_1196	0.94	0.752	chr16	74288307	74288632	MACS_peak_1196	0.7225	0.889231	70.78
MACS_peak_1220	chr16-78833923-78834323	1056.81	5.97805	0.000292296	chr16	78833774	78834274	MACS_peak_1220	0.8775	0.702	chr16	78833950	78834097	MACS_peak_1220	0.3675	1	66.3
MACS_peak_1253	chr17-4757796-4758196	37.0332	3.59609	0.0122257	chr17	4757577	4758077	MACS_peak_1253	0.7025	0.562	chr17	4757689	4757965	MACS_peak_1253	0.4225	0.612319	70.01
MACS_peak_1259	chr17-10108929-10109329	310.191	3.78971	0.0117461							chr17	10108954	10109215	MACS_peak_1259	0.6525	1	72.23
MACS_peak_1259	chr17-10108952-10109352	1392.24	3.48711	0.0142162							chr17	10108954	10109215	MACS_peak_1259	0.6525	1	72.23
MACS_peak_1259	chr17-10108931-10109331	435.515	3.00934	0.0047393							chr17	10108954	10109215	MACS_peak_1259	0.6525	1	72.23
MACS_peak_1259	chr17-10108954-10109354	2332.87	2.71406	0.00658098							chr17	10108954	10109215	MACS_peak_1259	0.6525	1	72.23
MACS_peak_1274	chr17-37202938-37203338	99.2032	5.82687	1.33615e-05	chr17	37202913	37203463	MACS_peak_1274	1	0.727273	chr17	37202874	37203502	MACS_peak_1274	1	0.636943	575.16
MACS_peak_1274	chr17-37202937-37203337	58.6764	5.40178	0.000123148	chr17	37202913	37203463	MACS_peak_1274	1	0.727273	chr17	37202874	37203502	MACS_peak_1274	1	0.636943	575.16
MACS_peak_1274	chr17-37203028-37203428	45.2577	4.54612	0.00196554	chr17	37202913	37203463	MACS_peak_1274	1	0.727273	chr17	37202874	37203502	MACS_peak_1274	1	0.636943	575.16
MACS_peak_1274	chr17-37203040-37203440	1917.06	4.34581	0.00394856	chr17	37202913	37203463	MACS_peak_1274	1	0.727273	chr17	37202874	37203502	MACS_peak_1274	1	0.636943	575.16
MACS_peak_1274	chr17-37203041-37203441	2831.46	4.08626	0.00260255	chr17	37202913	37203463	MACS_peak_1274	1	0.727273	chr17	37202874	37203502	MACS_peak_1274	1	0.636943	575.16
MACS_peak_1274	chr17-37202935-37203335	118.731	3.70111	0.00135553	chr17	37202913	37203463	MACS_peak_1274	1	0.727273	chr17	37202874	37203502	MACS_peak_1274	1	0.636943	575.16
MACS_peak_1274	chr17-37202936-37203336	1255.46	3.66873	0.00014566	chr17	37202913	37203463	MACS_peak_1274	1	0.727273	chr17	37202874	37203502	MACS_peak_1274	1	0.636943	575.16
MACS_peak_1274	chr17-37203043-37203443	1694.35	3.42087	0.000153625	chr17	37202913	37203463	MACS_peak_1274	1	0.727273	chr17	37202874	37203502	MACS_peak_1274	1	0.636943	575.16
MACS_peak_1274	chr17-37202934-37203334	110.073	3.25063	0.0248238	chr17	37202913	37203463	MACS_peak_1274	1	0.727273	chr17	37202874	37203502	MACS_peak_1274	1	0.636943	575.16
MACS_peak_1274	chr17-37203042-37203442	534.989	3.1937	0.00157993	chr17	37202913	37203463	MACS_peak_1274	1	0.727273	chr17	37202874	37203502	MACS_peak_1274	1	0.636943	575.16
MACS_peak_1329	chr17-58922533-58922933	459.138	7.5123	4.26771e-06	chr17	58922615	58923115	MACS_peak_1329	0.795	0.636	chr17	58922583	58923147	MACS_peak_1329	0.875	0.620567	177.8
MACS_peak_1329	chr17-58922670-58923070	10.838	3.99606	0.0142162	chr17	58922615	58923115	MACS_peak_1329	1	0.8	chr17	58922583	58923147	MACS_peak_1329	1	0.70922	177.8
MACS_peak_1352	chr17-60794160-60794560	45.4325	4.88699	0.000927801	chr17	60794010	60794560	MACS_peak_1352	1	0.727273	chr17	60793964	60794606	MACS_peak_1352	1	0.623053	107.82
MACS_peak_1355	chr17-62106552-62106952	50.4013	4.59321	0.00497197	chr17	62106665	62107165	MACS_peak_1355	0.7175	0.574	chr17	62106807	62107023	MACS_peak_1355	0.3625	0.671296	64.51
MACS_peak_1411	chr18-7035102-7035502	1349.33	8.90617	4.40013e-12	chr18	7034987	7035487	MACS_peak_1411	0.9625	0.77	chr18	7035106	7035368	MACS_peak_1411	0.655	1	105.34
MACS_peak_1422	chr18-20857318-20857718	24.3602	3.90508	0.0114381	chr18	20857279	20857779	MACS_peak_1422	1	0.8	chr18	20857417	20857640	MACS_peak_1422	0.5575	1	67.56
MACS_peak_1423	chr18-23112901-23113301	18.7713	3.97451	0.016401							chr18	23113114	23113364	MACS_peak_1423	0.4675	0.748	53.35
MACS_peak_1434	chr18-57566602-57567002	197.301	5.50088	0.00095646	chr18	57566701	57567201	MACS_peak_1434	0.7525	0.602	chr18	57566751	57567151	MACS_peak_1434	0.6275	0.6275	124.87
MACS_peak_1436	chr18-60239772-60240172	1085.52	8.76881	1.18923e-18	chr18	60239671	60240171	MACS_peak_1436	0.9975	0.798	chr18	60239774	60240068	MACS_peak_1436	0.735	1	110.56
MACS_peak_1452	chr18-77890069-77890469	2955	8.82186	1.26743e-17	chr18	77889896	77890396	MACS_peak_1452	0.8175	0.654	chr18	77890014	77890278	MACS_peak_1452	0.5225	0.791667	166.37
MACS_peak_1452	chr18-77890117-77890517	610.235	3.66131	0.0236728	chr18	77889896	77890396	MACS_peak_1452	0.6975	0.558	chr18	77890014	77890278	MACS_peak_1452	0.4025	0.609848	166.37
MACS_peak_1476	chr19-6577363-6577763	33.719	4.347	0.00531372	chr19	6577322	6577822	MACS_peak_1476	1	0.8	chr19	6577308	6577836	MACS_peak_1476	1	0.757576	187.88
MACS_peak_1476	chr19-6577361-6577761	10.7018	3.42669	0.0397047	chr19	6577322	6577822	MACS_peak_1476	1	0.8	chr19	6577308	6577836	MACS_peak_1476	1	0.757576	187.88
MACS_peak_1476	chr19-6577362-6577762	22.5636	3.12949	0.0386565	chr19	6577322	6577822	MACS_peak_1476	1	0.8	chr19	6577308	6577836	MACS_peak_1476	1	0.757576	187.88
MACS_peak_1518	chr19-42034595-42034995	20.5268	4.40503	0.0170176	chr19	42034500	42035000	MACS_peak_1518	1	0.8	chr19	42034581	42034918	MACS_peak_1518	0.8075	0.958457	144.79
MACS_peak_1518	chr19-42034538-42034938	33.4951	3.63387	0.0254645	chr19	42034500	42035000	MACS_peak_1518	1	0.8	chr19	42034581	42034918	MACS_peak_1518	0.8425	1	144.79
MACS_peak_1540	chr19-53798351-53798751	113.457	4.70868	0.000886884	chr19	53798307	53798807	MACS_peak_1540	1	0.8	chr19	53798258	53798856	MACS_peak_1540	1	0.668896	355.62
MACS_peak_1580	chr2-17881532-17881932	158.348	2.95389	0.0088542	chr2	17881435	17881935	MACS_peak_1580	1	0.8	chr2	17881536	17881833	MACS_peak_1580	0.7425	1	87.8
MACS_peak_1582	chr2-17996896-17997296	43.0882	4.21051	0.00597624	chr2	17996880	17997380	MACS_peak_1582	1	0.8	chr2	17996964	17997295	MACS_peak_1582	0.8275	1	138.38
MACS_peak_1586	chr2-19428535-19428935	19.8863	4.02245	0.0106344	chr2	19428469	19428969	MACS_peak_1586	1	0.8	chr2	19428419	19429018	MACS_peak_1586	1	0.66778	104.76
MACS_peak_1586	chr2-19428642-19429042	29.3707	3.42069	0.0261081	chr2	19428469	19428969	MACS_peak_1586	0.8175	0.654	chr2	19428419	19429018	MACS_peak_1586	0.94	0.627713	104.76
MACS_peak_1621	chr2-43023239-43023639	34.1185	4.36433	0.014699	chr2	43023124	43023624	MACS_peak_1621	0.9625	0.77	chr2	43023085	43023662	MACS_peak_1621	1	0.693241	227.79
MACS_peak_1621	chr2-43023238-43023638	28.8015	3.90148	0.0142162	chr2	43023124	43023624	MACS_peak_1621	0.965	0.772	chr2	43023085	43023662	MACS_peak_1621	1	0.693241	227.79
MACS_peak_1628	chr2-46662076-46662476	10.838	3.99606	0.0142162	chr2	46662105	46662605	MACS_peak_1628	0.9275	0.742	chr2	46662181	46662529	MACS_peak_1628	0.7375	0.847701	122.8
MACS_peak_1652	chr2-62186974-62187374	30.2191	4.16748	0.0116018							chr2	62187132	62187375	MACS_peak_1652	0.605	0.995885	79.03
MACS_peak_1652	chr2-62186973-62187373	24.2217	4.0658	0.0120646							chr2	62187132	62187375	MACS_peak_1652	0.6025	0.99177	79.03
MACS_peak_1652	chr2-62187195-62187595	10.8594	3.73405	0.0490482							chr2	62187132	62187375	MACS_peak_1652	0.45	0.740741	79.03
MACS_peak_1678	chr2-88837946-88838346	26.7894	3.78123	0.0153938	chr2	88837767	88838267	MACS_peak_1678	0.8025	0.642	chr2	88837784	88838249	MACS_peak_1678	0.7575	0.651613	262.75
MACS_peak_1682	chr2-99656914-99657314	1616.53	8.165	8.96119e-16							chr2	99657128	99657407	MACS_peak_1682	0.465	0.666667	90.87
MACS_peak_1682	chr2-99657114-99657514	161.125	5.71666	2.23816e-06							chr2	99657128	99657407	MACS_peak_1682	0.6975	1	90.87
MACS_peak_1682	chr2-99657138-99657538	1262.44	3.45194	0.000194407							chr2	99657128	99657407	MACS_peak_1682	0.6725	0.964158	90.87
MACS_peak_1682	chr2-99657186-99657586	39.931	3.42665	0.0204352							chr2	99657128	99657407	MACS_peak_1682	0.5525	0.792115	90.87
MACS_peak_1682	chr2-99657137-99657537	555.195	3.36483	0.000875103							chr2	99657128	99657407	MACS_peak_1682	0.675	0.967742	90.87
MACS_peak_1682	chr2-99657136-99657536	332.923	3.34599	0.0097877							chr2	99657128	99657407	MACS_peak_1682	0.6775	0.971326	90.87
MACS_peak_1683	chr2-99657252-99657652	235.136	7.05975	3.75189e-09							chr2	99657453	99657711	MACS_peak_1683	0.4975	0.771318	58.9
MACS_peak_1683	chr2-99657253-99657653	588.166	5.43324	2.03563e-05							chr2	99657453	99657711	MACS_peak_1683	0.5	0.775194	58.9
MACS_peak_1683	chr2-99657349-99657749	141.261	4.58244	0.000882282							chr2	99657453	99657711	MACS_peak_1683	0.645	1	58.9
MACS_peak_1683	chr2-99657255-99657655	936.09	4.40697	3.19756e-05							chr2	99657453	99657711	MACS_peak_1683	0.505	0.782946	58.9
MACS_peak_1683	chr2-99657254-99657654	876.951	4.04828	8.89666e-05							chr2	99657453	99657711	MACS_peak_1683	0.5025	0.77907	58.9
MACS_peak_1683	chr2-99657350-99657750	321.857	4.00436	0.0052996							chr2	99657453	99657711	MACS_peak_1683	0.645	1	58.9
MACS_peak_1683	chr2-99657352-99657752	264.82	2.97076	0.0236728							chr2	99657453	99657711	MACS_peak_1683	0.645	1	58.9
MACS_peak_1688	chr2-102320642-102321042	1429.41	8.78711	3.2321e-19	chr2	102320478	102320978	MACS_peak_1688	0.84	0.672	chr2	102320444	102321011	MACS_peak_1688	0.9225	0.650794	700.87
MACS_peak_1730	chr2-137133229-137133629	102.454	5.89718	4.06372e-06	chr2	137133035	137133535	MACS_peak_1730	0.765	0.612	chr2	137133043	137133526	MACS_peak_1730	0.7425	0.614907	260.58
MACS_peak_1730	chr2-137132977-137133377	27.8668	4.71895	0.0104514	chr2	137133035	137133535	MACS_peak_1730	0.855	0.684	chr2	137133043	137133526	MACS_peak_1730	0.835	0.691511	260.58
MACS_peak_1730	chr2-137133211-137133611	16.6829	3.66733	0.0254645	chr2	137133035	137133535	MACS_peak_1730	0.81	0.648	chr2	137133043	137133526	MACS_peak_1730	0.7875	0.652174	260.58
MACS_peak_1730	chr2-137132992-137133392	1219.77	2.91203	0.00448201	chr2	137133035	137133535	MACS_peak_1730	0.8925	0.714	chr2	137133043	137133526	MACS_peak_1730	0.8725	0.722567	260.58
MACS_peak_1737	chr2-147454643-147455043	129.057	5.77016	2.52659e-06	chr2	147454675	147455175	MACS_peak_1737	0.92	0.736	chr2	147454745	147455104	MACS_peak_1737	0.745	0.830084	119.25
MACS_peak_1737	chr2-147454644-147455044	86.7381	3.767	0.0024703	chr2	147454675	147455175	MACS_peak_1737	0.9225	0.738	chr2	147454745	147455104	MACS_peak_1737	0.7475	0.832869	119.25
MACS_peak_1737	chr2-147454646-147455046	56	2.72792	0.0419365	chr2	147454675	147455175	MACS_peak_1737	0.9275	0.742	chr2	147454745	147455104	MACS_peak_1737	0.7525	0.83844	119.25
MACS_peak_1746	chr2-151150096-151150496	89.5573	5.54507	6.84782e-05	chr2	151150204	151150704	MACS_peak_1746	0.73	0.584	chr2	151150275	151150633	MACS_peak_1746	0.5525	0.617318	71.2
MACS_peak_1746	chr2-151150097-151150497	118.134	4.13932	0.00970776	chr2	151150204	151150704	MACS_peak_1746	0.7325	0.586	chr2	151150275	151150633	MACS_peak_1746	0.555	0.620112	71.2
MACS_peak_1759	chr2-161209131-161209531	64.3705	5.44774	4.66182e-05	chr2	161208940	161209440	MACS_peak_1759	0.7725	0.618	chr2	161208944	161209435	MACS_peak_1759	0.76	0.619145	125.64
MACS_peak_1765	chr2-164882915-164883315	11.9014	3.80841	0.0451282	chr2	164882744	164883244	MACS_peak_1765	0.8225	0.658	chr2	164882911	164883076	MACS_peak_1765	0.4025	0.975758	60.84
MACS_peak_1795	chr2-178034693-178035093	62.8184	5.29291	0.000280957	chr2	178034740	178035290	MACS_peak_1795	0.8825	0.641818	chr2	178034702	178035327	MACS_peak_1795	0.9775	0.6256	370.78
MACS_peak_1795	chr2-178034679-178035079	40.1993	3.69366	0.0493584	chr2	178034740	178035290	MACS_peak_1795	0.8475	0.616364	chr2	178034702	178035327	MACS_peak_1795	0.9425	0.6032	370.78
MACS_peak_1795	chr2-178034889-178035289	7.26822	3.49693	0.0362369	chr2	178034740	178035290	MACS_peak_1795	1	0.727273	chr2	178034702	178035327	MACS_peak_1795	1	0.64	370.78
MACS_peak_1795	chr2-178034886-178035286	18.5016	3.30322	0.0397047	chr2	178034740	178035290	MACS_peak_1795	1	0.727273	chr2	178034702	178035327	MACS_peak_1795	1	0.64	370.78
MACS_peak_1845	chr2-205628675-205629075	815.151	4.64555	0.00196227	chr2	205628541	205629041	MACS_peak_1845	0.915	0.732	chr2	205628709	205628873	MACS_peak_1845	0.41	1	66.04
MACS_peak_1845	chr2-205628686-205629086	23.0332	4.52239	0.0142162	chr2	205628541	205629041	MACS_peak_1845	0.8875	0.71	chr2	205628709	205628873	MACS_peak_1845	0.41	1	66.04
MACS_peak_1845	chr2-205628673-205629073	538.181	4.03946	0.000635553	chr2	205628541	205629041	MACS_peak_1845	0.92	0.736	chr2	205628709	205628873	MACS_peak_1845	0.41	1	66.04
MACS_peak_1845	chr2-205628676-205629076	77.5071	3.88771	0.0100618	chr2	205628541	205629041	MACS_peak_1845	0.9125	0.73	chr2	205628709	205628873	MACS_peak_1845	0.41	1	66.04
MACS_peak_1845	chr2-205628682-205629082	123.182	3.77247	0.00730059	chr2	205628541	205629041	MACS_peak_1845	0.8975	0.718	chr2	205628709	205628873	MACS_peak_1845	0.41	1	66.04
MACS_peak_1845	chr2-205628674-205629074	123.122	2.86327	0.0236728	chr2	205628541	205629041	MACS_peak_1845	0.9175	0.734	chr2	205628709	205628873	MACS_peak_1845	0.41	1	66.04
MACS_peak_1860	chr2-216002514-216002914	34.0936	4.91479	0.00170828	chr2	216002454	216002954	MACS_peak_1860	1	0.8	chr2	216002437	216002971	MACS_peak_1860	1	0.749064	132.74
MACS_peak_1860	chr2-216002429-216002829	29.3413	4.46708	0.00873703	chr2	216002454	216002954	MACS_peak_1860	0.9375	0.75	chr2	216002437	216002971	MACS_peak_1860	0.98	0.734082	132.74
MACS_peak_1898	chr20-6081719-6082119	46.3943	3.7484	0.00835017	chr20	6081837	6082337	MACS_peak_1898	0.705	0.564	chr20	6081939	6082235	MACS_peak_1898	0.45	0.608108	88.03
MACS_peak_1898	chr20-6081717-6082117	137.166	3.53855	0.00511471	chr20	6081837	6082337	MACS_peak_1898	0.7	0.56	chr20	6081939	6082235	MACS_peak_1898	0.445	0.601351	88.03
MACS_peak_1898	chr20-6081718-6082118	19.2455	3.51273	0.0421454	chr20	6081837	6082337	MACS_peak_1898	0.7025	0.562	chr20	6081939	6082235	MACS_peak_1898	0.4475	0.60473	88.03
MACS_peak_1903	chr20-10100016-10100416	56.8835	5.08878	0.00016653	chr20	10099857	10100357	MACS_peak_1903	0.8525	0.682	chr20	10099845	10100368	MACS_peak_1903	0.88	0.67304	157.94
MACS_peak_1903	chr20-10100017-10100417	277.262	3.83671	0.000557793	chr20	10099857	10100357	MACS_peak_1903	0.85	0.68	chr20	10099845	10100368	MACS_peak_1903	0.8775	0.671128	157.94
MACS_peak_1903	chr20-10100015-10100415	415.306	3.78501	0.0147316	chr20	10099857	10100357	MACS_peak_1903	0.855	0.684	chr20	10099845	10100368	MACS_peak_1903	0.8825	0.674952	157.94
MACS_peak_1903	chr20-10099802-10100202	41.1853	3.33861	0.0337831	chr20	10099857	10100357	MACS_peak_1903	0.8625	0.69	chr20	10099845	10100368	MACS_peak_1903	0.8925	0.6826	157.94
MACS_peak_1903	chr20-10099878-10100278	117.278	3.09119	0.0261939	chr20	10099857	10100357	MACS_peak_1903	1	0.8	chr20	10099845	10100368	MACS_peak_1903	1	0.764818	157.94
MACS_peak_1907	chr20-15654235-15654635	15.2612	4.07509	0.0298645	chr20	15654121	15654621	MACS_peak_1907	0.965	0.772	chr20	15654275	15654467	MACS_peak_1907	0.48	1	67.96
MACS_peak_1911	chr20-18832779-18833179	25.3816	4.37128	0.00479238	chr20	18832886	18833386	MACS_peak_1911	0.7325	0.586	chr20	18832965	18833306	MACS_peak_1911	0.535	0.627566	64.42
MACS_peak_1931	chr20-34039026-34039426	7.26822	3.49693	0.0362369	chr20	34039061	34039561	MACS_peak_1931	0.9125	0.73	chr20	34039113	34039509	MACS_peak_1931	0.7825	0.790404	150.81
MACS_peak_1936	chr20-40494499-40494899	28.3555	3.49464	0.0268811	chr20	40494532	40495032	MACS_peak_1936	0.9175	0.734	chr20	40494698	40494866	MACS_peak_1936	0.42	1	61.24
MACS_peak_202	chr1-187607851-187608251	273.142	6.59386	7.28351e-09	chr1	187607817	187608317	MACS_peak_202	1	0.8	chr1	187607931	187608202	MACS_peak_202	0.6775	1	62.7
MACS_peak_202	chr1-187608027-187608427	1219.24	6.30175	1.68092e-08	chr1	187607817	187608317	MACS_peak_202	0.725	0.58	chr1	187607931	187608202	MACS_peak_202	0.4375	0.645756	62.7
MACS_peak_202	chr1-187607833-187608233	1705.15	5.57585	7.35227e-06	chr1	187607817	187608317	MACS_peak_202	1	0.8	chr1	187607931	187608202	MACS_peak_202	0.6775	1	62.7
MACS_peak_202	chr1-187607768-187608168	71.276	5.3771	4.75311e-05	chr1	187607817	187608317	MACS_peak_202	0.8775	0.702	chr1	187607931	187608202	MACS_peak_202	0.5925	0.874539	62.7
MACS_peak_202	chr1-187607834-187608234	966.543	5.2678	3.34359e-05	chr1	187607817	187608317	MACS_peak_202	1	0.8	chr1	187607931	187608202	MACS_peak_202	0.6775	1	62.7
MACS_peak_202	chr1-187607832-187608232	414.252	4.92527	1.57516e-06	chr1	187607817	187608317	MACS_peak_202	1	0.8	chr1	187607931	187608202	MACS_peak_202	0.6775	1	62.7
MACS_peak_202	chr1-187607831-187608231	692.189	4.74517	2.13085e-07	chr1	187607817	187608317	MACS_peak_202	1	0.8	chr1	187607931	187608202	MACS_peak_202	0.6775	1	62.7
MACS_peak_202	chr1-187607923-187608323	30.324	4.52621	0.00495397	chr1	187607817	187608317	MACS_peak_202	0.985	0.788	chr1	187607931	187608202	MACS_peak_202	0.6775	1	62.7
MACS_peak_202	chr1-187607926-187608326	646.272	4.49873	0.000124759	chr1	187607817	187608317	MACS_peak_202	0.9775	0.782	chr1	187607931	187608202	MACS_peak_202	0.6775	1	62.7
MACS_peak_202	chr1-187607998-187608398	357.57	4.35399	0.0112852	chr1	187607817	187608317	MACS_peak_202	0.7975	0.638	chr1	187607931	187608202	MACS_peak_202	0.51	0.752768	62.7
MACS_peak_202	chr1-187608017-187608417	26.3822	3.88458	0.0124934	chr1	187607817	187608317	MACS_peak_202	0.75	0.6	chr1	187607931	187608202	MACS_peak_202	0.4625	0.682657	62.7
MACS_peak_202	chr1-187607925-187608325	638.846	3.85026	0.00124836	chr1	187607817	187608317	MACS_peak_202	0.98	0.784	chr1	187607931	187608202	MACS_peak_202	0.6775	1	62.7
MACS_peak_202	chr1-187607927-187608327	136.991	3.4754	0.0219443	chr1	187607817	187608317	MACS_peak_202	0.975	0.78	chr1	187607931	187608202	MACS_peak_202	0.6775	1	62.7
MACS_peak_202	chr1-187607999-187608399	332.773	3.21568	0.00969974	chr1	187607817	187608317	MACS_peak_202	0.795	0.636	chr1	187607931	187608202	MACS_peak_202	0.5075	0.749077	62.7
MACS_peak_202	chr1-187607982-187608382	202.176	3.17434	0.0153938	chr1	187607817	187608317	MACS_peak_202	0.8375	0.67	chr1	187607931	187608202	MACS_peak_202	0.55	0.811808	62.7
MACS_peak_202	chr1-187607924-187608324	838.874	3.16211	0.00368387	chr1	187607817	187608317	MACS_peak_202	0.9825	0.786	chr1	187607931	187608202	MACS_peak_202	0.6775	1	62.7
MACS_peak_202	chr1-187607770-187608170	46.1662	2.90101	0.0406278	chr1	187607817	187608317	MACS_peak_202	0.8825	0.706	chr1	187607931	187608202	MACS_peak_202	0.5975	0.881919	62.7
MACS_peak_202	chr1-187608015-187608415	46.6631	2.66397	0.0445242	chr1	187607817	187608317	MACS_peak_202	0.755	0.604	chr1	187607931	187608202	MACS_peak_202	0.4675	0.690037	62.7
MACS_peak_2036	chr3-152906-153306	40.9742	5.13723	0.000223428	chr3	152715	153215	MACS_peak_2036	0.7725	0.618	chr3	152680	153249	MACS_peak_2036	0.8575	0.602812	260.32
MACS_peak_2036	chr3-152900-153300	116.083	3.29251	0.015256	chr3	152715	153215	MACS_peak_2036	0.7875	0.63	chr3	152680	153249	MACS_peak_2036	0.8725	0.613357	260.32
MACS_peak_2047	chr3-3601406-3601806	24.3987	4.10505	0.00593398	chr3	3601352	3601852	MACS_peak_2047	1	0.8	chr3	3601313	3601890	MACS_peak_2047	1	0.693241	117.89
MACS_peak_2109	chr3-42864805-42865205	20.5686	3.95913	0.016401	chr3	42864857	42865357	MACS_peak_2109	0.87	0.696	chr3	42864847	42865367	MACS_peak_2109	0.895	0.688462	148.14
MACS_peak_2118	chr3-56817838-56818238	698.81	3.44903	0.000686327	chr3	56817886	56818386	MACS_peak_2118	0.88	0.704	chr3	56817976	56818295	MACS_peak_2118	0.655	0.821317	127.79
MACS_peak_2118	chr3-56817837-56818237	138.385	2.87721	0.00819785	chr3	56817886	56818386	MACS_peak_2118	0.8775	0.702	chr3	56817976	56818295	MACS_peak_2118	0.6525	0.818182	127.79
MACS_peak_2137	chr3-78428723-78429123	15.2612	4.07509	0.0298645	chr3	78428717	78429217	MACS_peak_2137	1	0.8	chr3	78428875	78429058	MACS_peak_2137	0.4575	1	63.27
MACS_peak_2152	chr3-85556844-85557244	28.1473	4.37914	0.0147841	chr3	85556870	85557370	MACS_peak_2152	0.935	0.748	chr3	85557002	85557238	MACS_peak_2152	0.59	1	65.48
MACS_peak_2152	chr3-85556987-85557387	31.2126	3.78231	0.0402432	chr3	85556870	85557370	MACS_peak_2152	0.9575	0.766	chr3	85557002	85557238	MACS_peak_2152	0.59	1	65.48
MACS_peak_2152	chr3-85556845-85557245	225.193	3.61403	0.00794774	chr3	85556870	85557370	MACS_peak_2152	0.9375	0.75	chr3	85557002	85557238	MACS_peak_2152	0.59	1	65.48
MACS_peak_2152	chr3-85556942-85557342	136.816	3.44762	0.0362369	chr3	85556870	85557370	MACS_peak_2152	1	0.8	chr3	85557002	85557238	MACS_peak_2152	0.59	1	65.48
MACS_peak_2152	chr3-85556943-85557343	104.111	3.43882	0.0280863	chr3	85556870	85557370	MACS_peak_2152	1	0.8	chr3	85557002	85557238	MACS_peak_2152	0.59	1	65.48
MACS_peak_2152	chr3-85557018-85557418	51.6533	3.3962	0.0392414	chr3	85556870	85557370	MACS_peak_2152	0.88	0.704	chr3	85557002	85557238	MACS_peak_2152	0.55	0.932203	65.48
MACS_peak_2152	chr3-85556991-85557391	117.196	3.39529	0.0298645	chr3	85556870	85557370	MACS_peak_2152	0.9475	0.758	chr3	85557002	85557238	MACS_peak_2152	0.59	1	65.48
MACS_peak_2157	chr3-89046384-89046784	59.4561	5.00882	0.000748164	chr3	89046352	89046852	MACS_peak_2157	1	0.8	chr3	89046402	89046801	MACS_peak_2157	0.955	0.957393	102.11
MACS_peak_2157	chr3-89046383-89046783	10.838	3.99606	0.0142162	chr3	89046352	89046852	MACS_peak_2157	1	0.8	chr3	89046402	89046801	MACS_peak_2157	0.9525	0.954887	102.11
MACS_peak_2173	chr3-105091284-105091684	34.2341	4.87914	0.00281354	chr3	105091156	105091656	MACS_peak_2173	0.93	0.744	chr3	105091122	105091689	MACS_peak_2173	1	0.705467	111.8
MACS_peak_2202	chr3-140142379-140142779	22.2609	4.17206	0.0176567							chr3	140142461	140142639	MACS_peak_2202	0.445	1	51.96
MACS_peak_2209	chr3-146299781-146300181	11.5541	4.09979	0.0112658							chr3	146299793	146300071	MACS_peak_2209	0.695	1	59.66
MACS_peak_2209	chr3-146299873-146300273	43.6303	3.90445	0.0113415							chr3	146299793	146300071	MACS_peak_2209	0.495	0.71223	59.66
MACS_peak_2209	chr3-146299871-146300271	74.3338	2.76348	0.0438927							chr3	146299793	146300071	MACS_peak_2209	0.5	0.719424	59.66
MACS_peak_2223	chr3-159547294-159547694	32.2052	4.80916	0.00147111	chr3	159547322	159547822	MACS_peak_2223	0.93	0.744	chr3	159547310	159547834	MACS_peak_2223	0.96	0.732824	382.91
MACS_peak_2223	chr3-159547376-159547776	131.901	2.92642	0.0307046	chr3	159547322	159547822	MACS_peak_2223	1	0.8	chr3	159547310	159547834	MACS_peak_2223	1	0.763359	382.91
MACS_peak_2223	chr3-159547375-159547775	225.358	2.82296	0.0311572	chr3	159547322	159547822	MACS_peak_2223	1	0.8	chr3	159547310	159547834	MACS_peak_2223	1	0.763359	382.91
MACS_peak_2243	chr3-190875555-190875955	430.983	7.38058	3.96217e-09	chr3	190875352	190875852	MACS_peak_2243	0.7425	0.594	chr3	190875454	190875750	MACS_peak_2243	0.4875	0.658784	77.45
MACS_peak_2243	chr3-190875554-190875954	162.545	6.30162	8.19024e-06	chr3	190875352	190875852	MACS_peak_2243	0.745	0.596	chr3	190875454	190875750	MACS_peak_2243	0.49	0.662162	77.45
MACS_peak_2243	chr3-190875553-190875953	328.844	4.12948	0.0020091	chr3	190875352	190875852	MACS_peak_2243	0.7475	0.598	chr3	190875454	190875750	MACS_peak_2243	0.4925	0.665541	77.45
MACS_peak_2251	chr3-193922269-193922669	26.4122	4.7117	0.0021627	chr3	193922355	193922855	MACS_peak_2251	0.785	0.628	chr3	193922434	193922776	MACS_peak_2251	0.5875	0.687135	68.95
MACS_peak_2255	chr3-194908434-194908834	11.8422	3.65224	0.0320832	chr3	194908247	194908747	MACS_peak_2255	0.7825	0.626	chr3	194908231	194908763	MACS_peak_2255	0.8225	0.618421	230.27
MACS_peak_2258	chr3-196641034-196641434	10.838	3.99606	0.0142162	chr3	196640874	196641374	MACS_peak_2258	0.85	0.68	chr3	196641001	196641246	MACS_peak_2258	0.53	0.865306	64.14
MACS_peak_2269	chr4-5914413-5914813	287.278	2.47182	0.0325669	chr4	5914265	5914765	MACS_peak_2269	0.88	0.704	chr4	5914325	5914704	MACS_peak_2269	0.7275	0.76781	96.34
MACS_peak_2275	chr4-8065537-8065937	64.1741	5.00356	0.000718692	chr4	8065362	8065862	MACS_peak_2275	0.8125	0.65	chr4	8065411	8065812	MACS_peak_2275	0.6875	0.685786	89.79
MACS_peak_2275	chr4-8065538-8065938	41.0398	4.30231	0.00251797	chr4	8065362	8065862	MACS_peak_2275	0.81	0.648	chr4	8065411	8065812	MACS_peak_2275	0.685	0.683292	89.79
MACS_peak_2275	chr4-8065540-8065940	26.9322	3.41892	0.025528	chr4	8065362	8065862	MACS_peak_2275	0.805	0.644	chr4	8065411	8065812	MACS_peak_2275	0.68	0.678304	89.79
MACS_peak_2288	chr4-24864996-24865396	240.263	7.10169	9.27625e-09							chr4	24865274	24865458	MACS_peak_2288	0.305	0.663043	63.1
MACS_peak_2288	chr4-24865126-24865526	254.552	3.15146	0.00698588							chr4	24865274	24865458	MACS_peak_2288	0.46	1	63.1
MACS_peak_2292	chr4-31236163-31236563	126.953	6.19067	4.48688e-06	chr4	31236141	31236641	MACS_peak_2292	1	0.8	chr4	31236212	31236570	MACS_peak_2292	0.8775	0.980447	110.22
MACS_peak_2292	chr4-31236165-31236565	471.833	3.49771	0.0188501	chr4	31236141	31236641	MACS_peak_2292	1	0.8	chr4	31236212	31236570	MACS_peak_2292	0.8825	0.986034	110.22
MACS_peak_2292	chr4-31236296-31236696	97.0089	2.84052	0.0315483	chr4	31236141	31236641	MACS_peak_2292	0.8625	0.69	chr4	31236212	31236570	MACS_peak_2292	0.685	0.765363	110.22
MACS_peak_2296	chr4-35502549-35502949	32.3001	4.72035	0.00196554	chr4	35502367	35502867	MACS_peak_2296	0.795	0.636	chr4	35502490	35502744	MACS_peak_2296	0.4875	0.767717	73.31
MACS_peak_2296	chr4-35502310-35502710	15.2612	4.07509	0.0298645	chr4	35502367	35502867	MACS_peak_2296	0.8575	0.686	chr4	35502490	35502744	MACS_peak_2296	0.55	0.866142	73.31
MACS_peak_2331	chr4-75811639-75812039	2988.86	4.90207	0.0220097	chr4	75811687	75812187	MACS_peak_2331	0.88	0.704	chr4	75811683	75812191	MACS_peak_2331	0.89	0.700787	210.95
MACS_peak_2331	chr4-75811724-75812124	29.3764	3.87093	0.0327148	chr4	75811687	75812187	MACS_peak_2331	1	0.8	chr4	75811683	75812191	MACS_peak_2331	1	0.787402	210.95
MACS_peak_2333	chr4-77703024-77703424	17.7676	4.55809	0.00531372	chr4	77703052	77703652	MACS_peak_2333	0.93	0.62	chr4	77703021	77703683	MACS_peak_2333	1	0.60423	231.86
MACS_peak_2333	chr4-77703023-77703423	10.838	3.99606	0.0142162	chr4	77703052	77703652	MACS_peak_2333	0.9275	0.618333	chr4	77703021	77703683	MACS_peak_2333	1	0.60423	231.86
MACS_peak_2351	chr4-90602400-90602800	54.4254	4.27689	0.00152193	chr4	90602309	90602809	MACS_peak_2351	1	0.8	chr4	90602289	90602829	MACS_peak_2351	1	0.740741	283.08
MACS_peak_2383	chr4-121153342-121153742	15.4114	3.32975	0.039388	chr4	121153311	121153811	MACS_peak_2383	1	0.8	chr4	121153465	121153657	MACS_peak_2383	0.48	1	61.73
MACS_peak_2386	chr4-123698157-123698557	244.916	4.22766	0.00803061	chr4	123698005	123698505	MACS_peak_2386	0.87	0.696	chr4	123698028	123698482	MACS_peak_2386	0.8125	0.715859	218.02
MACS_peak_2390	chr4-125834743-125835143	588.945	7.71439	2.23816e-06	chr4	125834582	125835082	MACS_peak_2390	0.8475	0.678	chr4	125834580	125835083	MACS_peak_2390	0.85	0.675944	111.33
MACS_peak_2393	chr4-129607118-129607518	99.0351	5.87709	1.36628e-06							chr4	129607215	129607522	MACS_peak_2393	0.7575	0.986971	86.28
MACS_peak_2393	chr4-129607316-129607716	282.144	5.80638	1.74191e-07							chr4	129607215	129607522	MACS_peak_2393	0.515	0.67101	86.28
MACS_peak_2393	chr4-129607314-129607714	140.232	5.34004	3.70226e-05							chr4	129607215	129607522	MACS_peak_2393	0.52	0.677524	86.28
MACS_peak_2393	chr4-129607317-129607717	1156.94	4.63951	1.39891e-08							chr4	129607215	129607522	MACS_peak_2393	0.5125	0.667752	86.28
MACS_peak_2393	chr4-129607315-129607715	394.011	4.55609	5.75224e-06							chr4	129607215	129607522	MACS_peak_2393	0.5175	0.674267	86.28
MACS_peak_2424	chr4-168818403-168818803	154.34	6.28316	6.32949e-07	chr4	168818383	168818883	MACS_peak_2424	1	0.8	chr4	168818467	168818798	MACS_peak_2424	0.8275	1	103.88
MACS_peak_2424	chr4-168818401-168818801	401.935	5.50549	5.25377e-06	chr4	168818383	168818883	MACS_peak_2424	1	0.8	chr4	168818467	168818798	MACS_peak_2424	0.8275	1	103.88
MACS_peak_2430	chr4-173903519-173903919	11.9014	3.80841	0.0451282	chr4	173903381	173903881	MACS_peak_2430	0.905	0.724	chr4	173903438	173903823	MACS_peak_2430	0.76	0.78961	161.7
MACS_peak_2430	chr4-173903518-173903918	41.1359	3.65991	0.0114887	chr4	173903381	173903881	MACS_peak_2430	0.9075	0.726	chr4	173903438	173903823	MACS_peak_2430	0.7625	0.792208	161.7
MACS_peak_2430	chr4-173903520-173903920	15.3313	3.63715	0.0421454	chr4	173903381	173903881	MACS_peak_2430	0.9025	0.722	chr4	173903438	173903823	MACS_peak_2430	0.7575	0.787013	161.7
MACS_peak_2434	chr4-187841823-187842223	4012.05	4.64877	1.29415e-10	chr4	187841621	187842121	MACS_peak_2434	0.745	0.596	chr4	187841698	187842043	MACS_peak_2434	0.55	0.637681	101.57
MACS_peak_2434	chr4-187841666-187842066	18.1995	4.28206	0.0216847	chr4	187841621	187842121	MACS_peak_2434	1	0.8	chr4	187841698	187842043	MACS_peak_2434	0.8625	1	101.57
MACS_peak_2437	chr5-4019364-4019764	59.4184	5.12367	0.000138306	chr5	4019374	4019874	MACS_peak_2437	0.975	0.78	chr5	4019484	4019763	MACS_peak_2437	0.6975	1	118.23
MACS_peak_2437	chr5-4019435-4019835	2393.49	4.87331	7.73646e-07	chr5	4019374	4019874	MACS_peak_2437	1	0.8	chr5	4019484	4019763	MACS_peak_2437	0.6975	1	118.23
MACS_peak_2437	chr5-4019433-4019833	580.039	4.59965	0.00196554	chr5	4019374	4019874	MACS_peak_2437	1	0.8	chr5	4019484	4019763	MACS_peak_2437	0.6975	1	118.23
MACS_peak_2437	chr5-4019365-4019765	404.372	3.4068	0.0368875	chr5	4019374	4019874	MACS_peak_2437	0.9775	0.782	chr5	4019484	4019763	MACS_peak_2437	0.6975	1	118.23
MACS_peak_2437	chr5-4019366-4019766	104.653	3.20033	0.0334069	chr5	4019374	4019874	MACS_peak_2437	0.98	0.784	chr5	4019484	4019763	MACS_peak_2437	0.6975	1	118.23
MACS_peak_2437	chr5-4019367-4019767	753.122	2.76074	0.0248192	chr5	4019374	4019874	MACS_peak_2437	0.9825	0.786	chr5	4019484	4019763	MACS_peak_2437	0.6975	1	118.23
MACS_peak_2439	chr5-10528580-10528980	745.954	4.91101	0.000115413	chr5	10528489	10528989	MACS_peak_2439	1	0.8	chr5	10528615	10528863	MACS_peak_2439	0.62	1	80.86
MACS_peak_2450	chr5-19401225-19401625	117.85	3.1521	0.00528819	chr5	19401040	19401540	MACS_peak_2450	0.7875	0.63	chr5	19401151	19401428	MACS_peak_2450	0.5075	0.732852	65.04
MACS_peak_2451	chr5-19784016-19784416	5098.4	3.89871	3.60002e-06	chr5	19784098	19784598	MACS_peak_2451	0.795	0.636	chr5	19784181	19784515	MACS_peak_2451	0.5875	0.703593	78.35
MACS_peak_2451	chr5-19784132-19784532	24.2938	3.48161	0.0253176	chr5	19784098	19784598	MACS_peak_2451	1	0.8	chr5	19784181	19784515	MACS_peak_2451	0.835	1	78.35
MACS_peak_2460	chr5-24992806-24993206	15.2015	3.61911	0.0298645	chr5	24992779	24993279	MACS_peak_2460	1	0.8	chr5	24992899	24993158	MACS_peak_2460	0.6475	1	62.17
MACS_peak_2464	chr5-27471868-27472268	73.0312	3.95491	0.00593398	chr5	27471952	27472452	MACS_peak_2464	0.79	0.632	chr5	27472017	27472386	MACS_peak_2464	0.6275	0.680217	109
MACS_peak_2464	chr5-27471867-27472267	56.7573	3.1612	0.0463597	chr5	27471952	27472452	MACS_peak_2464	0.7875	0.63	chr5	27472017	27472386	MACS_peak_2464	0.625	0.677507	109
MACS_peak_2468	chr5-36378578-36378978	20.4602	3.48633	0.0405013	chr5	36378651	36379151	MACS_peak_2468	0.8175	0.654	chr5	36378659	36379142	MACS_peak_2468	0.7975	0.660455	129.22
MACS_peak_2468	chr5-36378580-36378980	38.5441	2.96575	0.0409683	chr5	36378651	36379151	MACS_peak_2468	0.8225	0.658	chr5	36378659	36379142	MACS_peak_2468	0.8025	0.664596	129.22
MACS_peak_2469	chr5-36442373-36442773	57.8772	5.33834	7.02346e-05	chr5	36442347	36442847	MACS_peak_2469	1	0.8	chr5	36442307	36442887	MACS_peak_2469	1	0.689655	218.59
MACS_peak_2469	chr5-36442539-36442939	1912.12	4.06717	0.0115198	chr5	36442347	36442847	MACS_peak_2469	0.77	0.616	chr5	36442307	36442887	MACS_peak_2469	0.87	0.6	218.59
MACS_peak_2469	chr5-36442538-36442938	2915.33	3.52225	0.0119919	chr5	36442347	36442847	MACS_peak_2469	0.7725	0.618	chr5	36442307	36442887	MACS_peak_2469	0.8725	0.601724	218.59
MACS_peak_2469	chr5-36442372-36442772	115.828	3.41514	0.018056	chr5	36442347	36442847	MACS_peak_2469	1	0.8	chr5	36442307	36442887	MACS_peak_2469	1	0.689655	218.59
MACS_peak_2469	chr5-36442536-36442936	1897.4	3.03273	0.000686327	chr5	36442347	36442847	MACS_peak_2469	0.7775	0.622	chr5	36442307	36442887	MACS_peak_2469	0.8775	0.605172	218.59
MACS_peak_2469	chr5-36442371-36442771	126.214	2.95866	0.0363988	chr5	36442347	36442847	MACS_peak_2469	1	0.8	chr5	36442307	36442887	MACS_peak_2469	1	0.689655	218.59
MACS_peak_2469	chr5-36442537-36442937	736.842	2.95012	0.00368387	chr5	36442347	36442847	MACS_peak_2469	0.775	0.62	chr5	36442307	36442887	MACS_peak_2469	0.875	0.603448	218.59
MACS_peak_2472	chr5-38427209-38427609	45.4085	3.90467	0.0323686	chr5	38427186	38427686	MACS_peak_2472	1	0.8	chr5	38427175	38427696	MACS_peak_2472	1	0.767754	183.2
MACS_peak_2486	chr5-40568715-40569115	33.0402	4.79775	0.00593398	chr5	40568696	40569196	MACS_peak_2486	1	0.8	chr5	40568700	40569192	MACS_peak_2486	1	0.813008	154.46
MACS_peak_2486	chr5-40568623-40569023	228.825	3.21086	0.0424754	chr5	40568696	40569196	MACS_peak_2486	0.8175	0.654	chr5	40568700	40569192	MACS_peak_2486	0.8075	0.656504	154.46
MACS_peak_2486	chr5-40568622-40569022	124.708	3.07465	0.00526149	chr5	40568696	40569196	MACS_peak_2486	0.815	0.652	chr5	40568700	40569192	MACS_peak_2486	0.805	0.654472	154.46
MACS_peak_2486	chr5-40568624-40569024	269.9	3.03122	0.00531372	chr5	40568696	40569196	MACS_peak_2486	0.82	0.656	chr5	40568700	40569192	MACS_peak_2486	0.81	0.658537	154.46
MACS_peak_2490	chr5-40601370-40601770	215.563	4.56071	0.000491538	chr5	40601192	40601692	MACS_peak_2490	0.805	0.644	chr5	40601222	40601661	MACS_peak_2490	0.7275	0.66287	172.23
MACS_peak_2490	chr5-40601372-40601772	310.706	3.04285	0.0080941	chr5	40601192	40601692	MACS_peak_2490	0.8	0.64	chr5	40601222	40601661	MACS_peak_2490	0.7225	0.658314	172.23
MACS_peak_2498	chr5-41176862-41177262	9.58482	3.77455	0.0276784	chr5	41176961	41177461	MACS_peak_2498	0.7525	0.602	chr5	41177080	41177341	MACS_peak_2498	0.455	0.697318	63.51
MACS_peak_2512	chr5-42598419-42598819	47.7384	4.42853	0.0142162	chr5	42598284	42598784	MACS_peak_2512	0.9125	0.73	chr5	42598328	42598740	MACS_peak_2512	0.8025	0.779126	159.45
MACS_peak_2512	chr5-42598440-42598840	10.838	3.99606	0.0142162	chr5	42598284	42598784	MACS_peak_2512	0.86	0.688	chr5	42598328	42598740	MACS_peak_2512	0.75	0.728155	159.45
MACS_peak_2512	chr5-42598442-42598842	15.3945	3.9864	0.0201262	chr5	42598284	42598784	MACS_peak_2512	0.855	0.684	chr5	42598328	42598740	MACS_peak_2512	0.745	0.723301	159.45
MACS_peak_2521	chr5-42838872-42839272	13.1093	3.78059	0.0351196	chr5	42838828	42839328	MACS_peak_2521	1	0.8	chr5	42838905	42839251	MACS_peak_2521	0.865	1	73.44
MACS_peak_2530	chr5-43208727-43209127	332.675	3.35741	0.0149522	chr5	43208697	43209197	MACS_peak_2530	1	0.8	chr5	43208700	43209193	MACS_peak_2530	1	0.811359	146.86
MACS_peak_2530	chr5-43208725-43209125	608.349	2.42377	0.0351044	chr5	43208697	43209197	MACS_peak_2530	1	0.8	chr5	43208700	43209193	MACS_peak_2530	1	0.811359	146.86
MACS_peak_2546	chr5-43893071-43893471	44.0413	5.87652	1.7379e-05	chr5	43893119	43893619	MACS_peak_2546	0.88	0.704	chr5	43893186	43893552	MACS_peak_2546	0.7125	0.778689	82.58
MACS_peak_2546	chr5-43893069-43893469	31.9979	3.16788	0.0178986	chr5	43893119	43893619	MACS_peak_2546	0.875	0.7	chr5	43893186	43893552	MACS_peak_2546	0.7075	0.773224	82.58
MACS_peak_2574	chr5-45727577-45727977	30.749	4.38659	0.00243996	chr5	45727401	45727901	MACS_peak_2574	0.81	0.648	chr5	45727550	45727752	MACS_peak_2574	0.4375	0.866337	60.1
MACS_peak_2576	chr5-45878160-45878560	11.9014	3.80841	0.0451282	chr5	45878229	45878729	MACS_peak_2576	0.8275	0.662	chr5	45878331	45878626	MACS_peak_2576	0.5725	0.776271	73.41
MACS_peak_2587	chr5-52786609-52787009	2362.89	9.49523	1.67466e-16	chr5	52786497	52786997	MACS_peak_2587	0.97	0.776	chr5	52786632	52786861	MACS_peak_2587	0.5725	1	76.07
MACS_peak_2587	chr5-52786621-52787021	161.677	6.21511	8.1798e-07	chr5	52786497	52786997	MACS_peak_2587	0.94	0.752	chr5	52786632	52786861	MACS_peak_2587	0.5725	1	76.07
MACS_peak_2587	chr5-52786615-52787015	6695.71	4.58022	9.136e-08	chr5	52786497	52786997	MACS_peak_2587	0.955	0.764	chr5	52786632	52786861	MACS_peak_2587	0.5725	1	76.07
MACS_peak_260	chr1-212769845-212770245	29.3063	4.21767	0.0165834	chr1	212769678	212770178	MACS_peak_260	0.8325	0.666	chr1	212769734	212770121	MACS_peak_260	0.69	0.713178	102.2
MACS_peak_2609	chr5-66390704-66391104	2256.27	9.42593	1.4049e-11	chr5	66390621	66391121	MACS_peak_2609	1	0.8	chr5	66390613	66391128	MACS_peak_2609	1	0.776699	158.1
MACS_peak_2609	chr5-66390524-66390924	35.3761	4.05031	0.00889738	chr5	66390621	66391121	MACS_peak_2609	0.7575	0.606	chr5	66390613	66391128	MACS_peak_2609	0.7775	0.603883	158.1
MACS_peak_2609	chr5-66390523-66390923	59.6403	3.2515	0.0225935	chr5	66390621	66391121	MACS_peak_2609	0.755	0.604	chr5	66390613	66391128	MACS_peak_2609	0.775	0.601942	158.1
MACS_peak_2609	chr5-66390525-66390925	178.006	2.79464	0.00988887	chr5	66390621	66391121	MACS_peak_2609	0.76	0.608	chr5	66390613	66391128	MACS_peak_2609	0.78	0.605825	158.1
MACS_peak_2619	chr5-73942795-73943195	18.1995	4.28206	0.0216847	chr5	73942907	73943407	MACS_peak_2619	0.72	0.576	chr5	73942971	73943342	MACS_peak_2619	0.56	0.603774	108.59
MACS_peak_2619	chr5-73942993-73943393	30.1102	3.87417	0.0142162	chr5	73942907	73943407	MACS_peak_2619	1	0.8	chr5	73942971	73943342	MACS_peak_2619	0.8725	0.940701	108.59
MACS_peak_2629	chr5-79763038-79763438	723.231	4.41268	8.95837e-07	chr5	79762990	79763490	MACS_peak_2629	1	0.8	chr5	79762981	79763499	MACS_peak_2629	1	0.772201	188.08
MACS_peak_2629	chr5-79762944-79763344	12.3881	3.83229	0.0276784	chr5	79762990	79763490	MACS_peak_2629	0.885	0.708	chr5	79762981	79763499	MACS_peak_2629	0.9075	0.700772	188.08
MACS_peak_2629	chr5-79763077-79763477	25.1436	3.32504	0.0392452	chr5	79762990	79763490	MACS_peak_2629	1	0.8	chr5	79762981	79763499	MACS_peak_2629	1	0.772201	188.08
MACS_peak_2659	chr5-94931682-94932082	7.26822	3.49693	0.0362369	chr5	94931491	94931991	MACS_peak_2659	0.7725	0.618	chr5	94931625	94931857	MACS_peak_2659	0.4375	0.75431	66.09
MACS_peak_2682	chr5-103652186-103652586	54.1649	5.42795	0.000244082							chr5	103652294	103652537	MACS_peak_2682	0.6075	1	54.24
MACS_peak_2682	chr5-103652223-103652623	34.5133	4.32075	0.0122491							chr5	103652294	103652537	MACS_peak_2682	0.6075	1	54.24
MACS_peak_2703	chr5-111815203-111815603	12.1895	3.62129	0.0408198	chr5	111815075	111815575	MACS_peak_2703	0.93	0.744	chr5	111815148	111815501	MACS_peak_2703	0.745	0.844193	64.29
MACS_peak_271	chr1-218774414-218774814	67.9842	4.11531	0.00258088	chr1	218774247	218774747	MACS_peak_271	0.8325	0.666	chr1	218774207	218774787	MACS_peak_271	0.9325	0.643103	165.95
MACS_peak_271	chr1-218774413-218774813	159.273	3.73451	0.0307046	chr1	218774247	218774747	MACS_peak_271	0.835	0.668	chr1	218774207	218774787	MACS_peak_271	0.935	0.644828	165.95
MACS_peak_2721	chr5-118659389-118659789	14.2607	3.44958	0.0499406	chr5	118659448	118659948	MACS_peak_2721	0.8525	0.682	chr5	118659561	118659834	MACS_peak_2721	0.57	0.835165	67.97
MACS_peak_2724	chr5-120307290-120307690	78.0837	3.09961	0.0260202	chr5	120307310	120307810	MACS_peak_2724	0.95	0.76	chr5	120307418	120307701	MACS_peak_2724	0.68	0.961131	82.49
MACS_peak_274	chr1-220509909-220510309	118.37	4.14486	0.0046721	chr1	220509785	220510285	MACS_peak_274	0.94	0.752	chr1	220509842	220510228	MACS_peak_274	0.7975	0.826425	85.24
MACS_peak_274	chr1-220509818-220510218	42.8215	4.05562	0.00593398	chr1	220509785	220510285	MACS_peak_274	1	0.8	chr1	220509842	220510228	MACS_peak_274	0.94	0.974093	85.24
MACS_peak_274	chr1-220509941-220510341	13.1268	3.92449	0.0182116	chr1	220509785	220510285	MACS_peak_274	0.86	0.688	chr1	220509842	220510228	MACS_peak_274	0.7175	0.743523	85.24
MACS_peak_274	chr1-220509722-220510122	25.8658	3.7372	0.0451282	chr1	220509785	220510285	MACS_peak_274	0.8425	0.674	chr1	220509842	220510228	MACS_peak_274	0.7	0.725389	85.24
MACS_peak_274	chr1-220509721-220510121	85.8244	3.50091	0.0183023	chr1	220509785	220510285	MACS_peak_274	0.84	0.672	chr1	220509842	220510228	MACS_peak_274	0.6975	0.722798	85.24
MACS_peak_2747	chr5-131101058-131101458	79.3417	5.47422	0.00018996	chr5	131100914	131101414	MACS_peak_2747	0.89	0.712	chr5	131100980	131101348	MACS_peak_2747	0.725	0.788043	97.89
MACS_peak_2782	chr5-152191728-152192128	146.743	5.31656	4.08119e-05	chr5	152191627	152192127	MACS_peak_2782	0.9975	0.798	chr5	152191766	152191987	MACS_peak_2782	0.5525	1	67.84
MACS_peak_2782	chr5-152191729-152192129	682.744	4.30653	0.00203656	chr5	152191627	152192127	MACS_peak_2782	0.995	0.796	chr5	152191766	152191987	MACS_peak_2782	0.5525	1	67.84
MACS_peak_2802	chr5-163547077-163547477	170.791	4.39905	4.7368e-05	chr5	163546878	163547378	MACS_peak_2802	0.7525	0.602	chr5	163546880	163547376	MACS_peak_2802	0.7475	0.602823	244.62
MACS_peak_2802	chr5-163546890-163547290	24.4935	3.90566	0.0134584	chr5	163546878	163547378	MACS_peak_2802	1	0.8	chr5	163546880	163547376	MACS_peak_2802	1	0.806452	244.62
MACS_peak_2802	chr5-163547075-163547475	687.775	3.32235	0.0384338	chr5	163546878	163547378	MACS_peak_2802	0.7575	0.606	chr5	163546880	163547376	MACS_peak_2802	0.7525	0.606855	244.62
MACS_peak_2816	chr5-173755585-173755985	19.516	4.26982	0.00498494	chr5	173755516	173756116	MACS_peak_2816	1	0.666667	chr5	173755490	173756141	MACS_peak_2816	1	0.614439	571.4
MACS_peak_2881	chr6-38362106-38362506	9.58482	3.77455	0.0276784	chr6	38362001	38362501	MACS_peak_2881	0.9875	0.79	chr6	38362098	38362403	MACS_peak_2881	0.7425	0.97377	69.21
MACS_peak_2887	chr6-41157553-41157953	192.785	3.22257	0.044853							chr6	41157607	41157947	MACS_peak_2887	0.85	1	102.38
MACS_peak_2887	chr6-41157492-41157892	49.5378	3.21761	0.0243937							chr6	41157607	41157947	MACS_peak_2887	0.7125	0.838235	102.38
MACS_peak_2887	chr6-41157551-41157951	440.618	3.13817	0.00690281							chr6	41157607	41157947	MACS_peak_2887	0.85	1	102.38
MACS_peak_2887	chr6-41157489-41157889	383.57	2.79464	0.0220832							chr6	41157607	41157947	MACS_peak_2887	0.705	0.829412	102.38
MACS_peak_2887	chr6-41157490-41157890	85.9138	2.65688	0.0262007							chr6	41157607	41157947	MACS_peak_2887	0.7075	0.832353	102.38
MACS_peak_2896	chr6-44652835-44653235	22.4008	4.46987	0.0159077	chr6	44652892	44653392	MACS_peak_2896	0.8575	0.686	chr6	44652886	44653397	MACS_peak_2896	0.8725	0.682975	428.98
MACS_peak_290	chr1-244402540-244402940	18.5573	4.15423	0.00593398	chr1	244402647	244403147	MACS_peak_290	0.7325	0.586	chr1	244402697	244403096	MACS_peak_290	0.6075	0.609023	123.17
MACS_peak_290	chr1-244402617-244403017	306.44	2.56817	0.0275851	chr1	244402647	244403147	MACS_peak_290	0.925	0.74	chr1	244402697	244403096	MACS_peak_290	0.8	0.802005	123.17
MACS_peak_2900	chr6-48078745-48079145	15.4226	3.79747	0.0172916	chr6	48078730	48079280	MACS_peak_2900	1	0.727273	chr6	48078691	48079319	MACS_peak_2900	1	0.636943	262.77
MACS_peak_2922	chr6-58774186-58774586	25.3605	4.62111	0.0127902	chr6	58774182	58774682	MACS_peak_2922	1	0.8	chr6	58774235	58774628	MACS_peak_2922	0.8775	0.89313	70.39
MACS_peak_2922	chr6-58774310-58774710	10.838	3.99606	0.0142162	chr6	58774182	58774682	MACS_peak_2922	0.93	0.744	chr6	58774235	58774628	MACS_peak_2922	0.795	0.80916	70.39
MACS_peak_2922	chr6-58774086-58774486	18.5152	3.77097	0.0341008	chr6	58774182	58774682	MACS_peak_2922	0.76	0.608	chr6	58774235	58774628	MACS_peak_2922	0.6275	0.638677	70.39
MACS_peak_2924	chr6-62564481-62564881	10.838	3.99606	0.0142162	chr6	62564330	62564830	MACS_peak_2924	0.8725	0.698	chr6	62564444	62564716	MACS_peak_2924	0.5875	0.863971	70.59
MACS_peak_2925	chr6-63709245-63709645	157.906	4.00064	0.00525708							chr6	63709274	63709520	MACS_peak_2925	0.615	1	53.86
MACS_peak_2925	chr6-63709247-63709647	534.098	2.95931	0.0148565							chr6	63709274	63709520	MACS_peak_2925	0.615	1	53.86
MACS_peak_2925	chr6-63709246-63709646	88.1765	2.61724	0.0309291							chr6	63709274	63709520	MACS_peak_2925	0.615	1	53.86
MACS_peak_2955	chr6-75981644-75982044	2896.07	10.199	7.66778e-14	chr6	75981573	75982073	MACS_peak_2955	1	0.8	chr6	75981617	75982029	MACS_peak_2955	0.9625	0.934466	128.26
MACS_peak_2955	chr6-75981574-75981974	327.855	7.17025	4.5268e-09	chr6	75981573	75982073	MACS_peak_2955	1	0.8	chr6	75981617	75982029	MACS_peak_2955	0.8925	0.866505	128.26
MACS_peak_2955	chr6-75981618-75982018	1060.43	5.2419	3.03061e-06	chr6	75981573	75982073	MACS_peak_2955	1	0.8	chr6	75981617	75982029	MACS_peak_2955	1	0.970874	128.26
MACS_peak_2955	chr6-75981620-75982020	700.741	5.20918	0.000272957	chr6	75981573	75982073	MACS_peak_2955	1	0.8	chr6	75981617	75982029	MACS_peak_2955	1	0.970874	128.26
MACS_peak_2955	chr6-75981572-75981972	1648.57	5.06558	1.96651e-06	chr6	75981573	75982073	MACS_peak_2955	0.9975	0.798	chr6	75981617	75982029	MACS_peak_2955	0.8875	0.86165	128.26
MACS_peak_2955	chr6-75981622-75982022	35.9656	4.28859	0.00682127	chr6	75981573	75982073	MACS_peak_2955	1	0.8	chr6	75981617	75982029	MACS_peak_2955	1	0.970874	128.26
MACS_peak_2955	chr6-75981674-75982074	62.6717	3.93877	0.0115264	chr6	75981573	75982073	MACS_peak_2955	0.9975	0.798	chr6	75981617	75982029	MACS_peak_2955	0.8875	0.86165	128.26
MACS_peak_2955	chr6-75981619-75982019	503.555	3.59392	0.0298645	chr6	75981573	75982073	MACS_peak_2955	1	0.8	chr6	75981617	75982029	MACS_peak_2955	1	0.970874	128.26
MACS_peak_2955	chr6-75981781-75982181	23.7036	3.35711	0.0279258	chr6	75981573	75982073	MACS_peak_2955	0.73	0.584	chr6	75981617	75982029	MACS_peak_2955	0.62	0.601942	128.26
MACS_peak_2955	chr6-75981669-75982069	43.7272	3.13723	0.0491967	chr6	75981573	75982073	MACS_peak_2955	1	0.8	chr6	75981617	75982029	MACS_peak_2955	0.9	0.873786	128.26
MACS_peak_296	chr10-1767230-1767630	36.0463	4.59956	0.00158737	chr10	1767056	1767556	MACS_peak_296	0.815	0.652	chr10	1767119	1767492	MACS_peak_296	0.655	0.702413	79.11
MACS_peak_2966	chr6-81246065-81246465	226.623	6.78801	1.69446e-08							chr6	81245904	81246521	MACS_peak_2966	1	0.648298	454.69
MACS_peak_2966	chr6-81245987-81246387	2974.54	4.46547	4.16461e-06							chr6	81245904	81246521	MACS_peak_2966	1	0.648298	454.69
MACS_peak_2967	chr6-82469511-82469911	132.694	4.18877	9.08021e-05	chr6	82469535	82470035	MACS_peak_2967	0.94	0.752	chr6	82469635	82469935	MACS_peak_2967	0.69	0.92	91.61
MACS_peak_2967	chr6-82469509-82469909	385.126	3.59819	0.000749523	chr6	82469535	82470035	MACS_peak_2967	0.935	0.748	chr6	82469635	82469935	MACS_peak_2967	0.685	0.913333	91.61
MACS_peak_2967	chr6-82469510-82469910	197.466	2.9738	0.00882123	chr6	82469535	82470035	MACS_peak_2967	0.9375	0.75	chr6	82469635	82469935	MACS_peak_2967	0.6875	0.916667	91.61
MACS_peak_2977	chr6-86320800-86321200	19.5353	3.56592	0.0451282	chr6	86320898	86321398	MACS_peak_2977	0.755	0.604	chr6	86321047	86321248	MACS_peak_2977	0.3825	0.761194	60.26
MACS_peak_2984	chr6-90576010-90576410	33.719	4.347	0.00531372	chr6	90576026	90576526	MACS_peak_2984	0.96	0.768	chr6	90576175	90576377	MACS_peak_2984	0.505	1	60.1
MACS_peak_2993	chr6-94854443-94854843	38.255	4.78496	0.00225628	chr6	94854508	94855008	MACS_peak_2993	0.8375	0.67	chr6	94854572	94854943	MACS_peak_2993	0.6775	0.730458	152.92
MACS_peak_2993	chr6-94854430-94854830	425.52	3.11804	0.00327861	chr6	94854508	94855008	MACS_peak_2993	0.805	0.644	chr6	94854572	94854943	MACS_peak_2993	0.645	0.695418	152.92
MACS_peak_2996	chr6-96604366-96604766	10.838	3.99606	0.0142162	chr6	96604254	96604754	MACS_peak_2996	0.97	0.776	chr6	96604340	96604667	MACS_peak_2996	0.7525	0.920489	66.24
MACS_peak_3002	chr6-100782094-100782494	13.1653	4.29572	0.00593398	chr6	100782074	100782574	MACS_peak_3002	1	0.8	chr6	100782199	100782449	MACS_peak_3002	0.625	1	63.42
MACS_peak_3013	chr6-107551670-107552070	10.838	3.99606	0.0142162	chr6	107551593	107552093	MACS_peak_3013	1	0.8	chr6	107551682	107552004	MACS_peak_3013	0.805	1	94.56
MACS_peak_3013	chr6-107551669-107552069	19.0562	3.77419	0.015214	chr6	107551593	107552093	MACS_peak_3013	1	0.8	chr6	107551682	107552004	MACS_peak_3013	0.805	1	94.56
MACS_peak_3017	chr6-110203409-110203809	3976.83	4.89004	0.000302781							chr6	110203321	110203591	MACS_peak_3017	0.455	0.674074	122.18
MACS_peak_3017	chr6-110203411-110203811	177.563	3.20153	0.0304708							chr6	110203321	110203591	MACS_peak_3017	0.45	0.666667	122.18
MACS_peak_3020	chr6-112308462-112308862	159.288	4.8019	0.000298447	chr6	112308450	112308950	MACS_peak_3020	1	0.8	chr6	112308499	112308901	MACS_peak_3020	0.9075	0.902985	141.82
MACS_peak_3020	chr6-112308460-112308860	258.887	3.92421	0.00238856	chr6	112308450	112308950	MACS_peak_3020	1	0.8	chr6	112308499	112308901	MACS_peak_3020	0.9025	0.89801	141.82
MACS_peak_3044	chr6-127907496-127907896	22.0714	3.79877	0.0155045	chr6	127907432	127907932	MACS_peak_3044	1	0.8	chr6	127907560	127907803	MACS_peak_3044	0.6075	1	75.08
MACS_peak_3044	chr6-127907467-127907867	786.172	3.76553	0.0240998	chr6	127907432	127907932	MACS_peak_3044	1	0.8	chr6	127907560	127907803	MACS_peak_3044	0.6075	1	75.08
MACS_peak_3044	chr6-127907465-127907865	2371.32	3.08423	0.00243996	chr6	127907432	127907932	MACS_peak_3044	1	0.8	chr6	127907560	127907803	MACS_peak_3044	0.6075	1	75.08
MACS_peak_3066	chr6-149401027-149401427	47.7384	4.42853	0.0142162	chr6	149400843	149401343	MACS_peak_3066	0.79	0.632	chr6	149400901	149401284	MACS_peak_3066	0.6425	0.671018	66.71
MACS_peak_3066	chr6-149400862-149401262	7.26822	3.49693	0.0362369	chr6	149400843	149401343	MACS_peak_3066	1	0.8	chr6	149400901	149401284	MACS_peak_3066	0.9025	0.942559	66.71
MACS_peak_3067	chr6-149657559-149657959	3232.13	4.32232	3.04366e-06	chr6	149657632	149658132	MACS_peak_3067	0.8175	0.654	chr6	149657759	149658004	MACS_peak_3067	0.5	0.816327	77.79
MACS_peak_3067	chr6-149657556-149657956	4482.12	2.4317	0.0102612	chr6	149657632	149658132	MACS_peak_3067	0.81	0.648	chr6	149657759	149658004	MACS_peak_3067	0.4925	0.804082	77.79
MACS_peak_3070	chr6-152543041-152543441	62.5824	5.6716	0.000244082	chr6	152542909	152543409	MACS_peak_3070	0.92	0.736	chr6	152542941	152543377	MACS_peak_3070	0.84	0.770642	303.25
MACS_peak_3127	chr7-42636857-42637257	15.2388	3.58296	0.0260911	chr7	42636767	42637267	MACS_peak_3127	1	0.8	chr7	42636907	42637127	MACS_peak_3127	0.55	1	79.02
MACS_peak_3127	chr7-42636856-42637256	11.2424	3.36341	0.0420113	chr7	42636767	42637267	MACS_peak_3127	1	0.8	chr7	42636907	42637127	MACS_peak_3127	0.55	1	79.02
MACS_peak_3130	chr7-43617050-43617450	124.822	6.20857	2.48296e-07							chr7	43616873	43617506	MACS_peak_3130	1	0.631912	261.71
MACS_peak_3130	chr7-43616932-43617332	478.654	2.54815	0.0246857							chr7	43616873	43617506	MACS_peak_3130	1	0.631912	261.71
MACS_peak_314	chr10-10520106-10520506	10.838	3.99606	0.0142162	chr10	10520221	10520721	MACS_peak_314	0.7125	0.57	chr10	10520387	10520554	MACS_peak_314	0.2975	0.712575	77.34
MACS_peak_3141	chr7-52251567-52251967	55.5759	5.04109	0.000131007	chr7	52251635	52252135	MACS_peak_3141	0.83	0.664	chr7	52251771	52251998	MACS_peak_3141	0.49	0.863436	76.7
MACS_peak_3141	chr7-52251565-52251965	53.9848	2.90405	0.0226035	chr7	52251635	52252135	MACS_peak_3141	0.825	0.66	chr7	52251771	52251998	MACS_peak_3141	0.485	0.854626	76.7
MACS_peak_3143	chr7-66809859-66810259	99.7738	4.90548	0.00408097	chr7	66809801	66810301	MACS_peak_3143	1	0.8	chr7	66809879	66810222	MACS_peak_3143	0.8575	1	83.6
MACS_peak_3143	chr7-66809879-66810279	10.8594	3.73405	0.0490482	chr7	66809801	66810301	MACS_peak_3143	1	0.8	chr7	66809879	66810222	MACS_peak_3143	0.8575	1	83.6
MACS_peak_3146	chr7-70301425-70301825	332.528	3.15961	0.00899842							chr7	70301530	70301755	MACS_peak_3146	0.5625	1	67.19
MACS_peak_3146	chr7-70301426-70301826	183.546	2.93426	0.0342202							chr7	70301530	70301755	MACS_peak_3146	0.5625	1	67.19
MACS_peak_3147	chr7-70314512-70314912	55.8971	5.0564	0.000204671	chr7	70314504	70315004	MACS_peak_3147	1	0.8	chr7	70314527	70314981	MACS_peak_3147	0.9625	0.848018	128.12
MACS_peak_3147	chr7-70314657-70315057	39.4134	4.13215	0.00241104	chr7	70314504	70315004	MACS_peak_3147	0.8675	0.694	chr7	70314527	70314981	MACS_peak_3147	0.81	0.713656	128.12
MACS_peak_3147	chr7-70314510-70314910	824.501	3.17024	0.00605386	chr7	70314504	70315004	MACS_peak_3147	1	0.8	chr7	70314527	70314981	MACS_peak_3147	0.9575	0.843612	128.12
MACS_peak_316	chr10-13800197-13800597	113.297	3.12796	0.043969	chr10	13800177	13800677	MACS_peak_316	1	0.8	chr10	13800235	13800618	MACS_peak_316	0.905	0.94517	122.67
MACS_peak_3162	chr7-81252432-81252832	409.407	7.55283	1.57111e-11	chr7	81252378	81252878	MACS_peak_3162	1	0.8	chr7	81252434	81252821	MACS_peak_3162	0.9675	1	95.19
MACS_peak_3162	chr7-81252431-81252831	40.6098	4.21299	0.00584294	chr7	81252378	81252878	MACS_peak_3162	1	0.8	chr7	81252434	81252821	MACS_peak_3162	0.9675	1	95.19
MACS_peak_3162	chr7-81252378-81252778	439.582	4.142	0.000958918	chr7	81252378	81252878	MACS_peak_3162	1	0.8	chr7	81252434	81252821	MACS_peak_3162	0.86	0.888889	95.19
MACS_peak_3162	chr7-81252434-81252834	655.792	4.04934	0.000423279	chr7	81252378	81252878	MACS_peak_3162	1	0.8	chr7	81252434	81252821	MACS_peak_3162	0.9675	1	95.19
MACS_peak_3162	chr7-81252495-81252895	39.4624	4.00784	0.00593398	chr7	81252378	81252878	MACS_peak_3162	0.9575	0.766	chr7	81252434	81252821	MACS_peak_3162	0.815	0.842377	95.19
MACS_peak_3162	chr7-81252433-81252833	1308.65	3.94283	0.0143127	chr7	81252378	81252878	MACS_peak_3162	1	0.8	chr7	81252434	81252821	MACS_peak_3162	0.9675	1	95.19
[truncated: 151 more rows]

## Sheet: STARR-seq_subsets
	design information				peak information				region information
[truncated: 976 more rows]
