# Supplementary material for: Multiplex enhancer-reporter assays uncover unsophisticated TP53 enhancer logic
Source: HighWire-hosted journal article supplement (doi:10.1101/gr.204149.116), 2016-05-18
Supplement: Supplemental_Tables_S1-S5andS8.zip [file Supplemental_Table_S5.xlsx]

## Sheet: Sheet1
peak	gene	distance	subset
MACS_peak_2875	CDKN1A	-11443	direct
MACS_peak_2876	CDKN1A	-2252	direct
MACS_peak_2878	CDKN1A	3943	direct
MACS_peak_1492	GDF15	-17173	direct
MACS_peak_1493	GDF15	-8214	direct
MACS_peak_1529	BBC3	189	direct
MACS_peak_1528	BBC3	1438	direct
MACS_peak_3311	TRIM55	-13261	direct
MACS_peak_3312	TRIM55	-2447	direct
MACS_peak_1003	TRPM1	10418	direct
MACS_peak_1055	RFX7	2690	direct
MACS_peak_1064	ENSG00000268327	18218	direct
MACS_peak_1068	RPS27L	558	direct
MACS_peak_1099	AEN	19	direct
MACS_peak_110	CHI3L2	13877	direct
MACS_peak_1117	MAPK8IP3	-4531	direct
MACS_peak_112	PIFO	18666	direct
MACS_peak_1120	SRRM2	-12033	direct
MACS_peak_1126	MGRN1	1240	direct
MACS_peak_113	MOV10	13148	direct
MACS_peak_1150	ITGAM	13941	direct
MACS_peak_1167	SLC12A4	2322	direct
MACS_peak_120	NHLH2	4494	direct
MACS_peak_1259	GAS7	-7255	direct
MACS_peak_1263	ADORA2B	19025	direct
MACS_peak_1266	ALDH3A1	-7878	direct
MACS_peak_1269	TRAF4	-829	direct
MACS_peak_1290	MRPL27	1466	direct
MACS_peak_1354	DDX42	18706	direct
MACS_peak_1355	ICAM2	-8878	direct
MACS_peak_1367	MAP2K6	15938	direct
MACS_peak_1389	C17orf89	625	direct
MACS_peak_1427	ASXL3	-17739	direct
MACS_peak_1470	EEF2	3338	direct
MACS_peak_1476	CD70	13549	direct
MACS_peak_1485	CALR	1948	direct
MACS_peak_1504	FAM187B	12049	direct
MACS_peak_1511	LGALS7	-2134	direct
MACS_peak_1513	PLD3	-17402	direct
MACS_peak_1540	BIRC8	-3654	direct
MACS_peak_1545	ZNF524	-463	direct
MACS_peak_1611	CDC42EP3	17916	direct
MACS_peak_1621	HAAO	-3594	direct
MACS_peak_1653	CEP68	12565	direct
MACS_peak_1661	SPR	6860	direct
MACS_peak_1676	KDM3A	-14304	direct
MACS_peak_1678	TEX37	13842	direct
MACS_peak_1688	MAP4K4	6142	direct
MACS_peak_1694	SULT1C4	-13195	direct
MACS_peak_1695	GCC2	-3153	direct
MACS_peak_1705	STEAP3	-5335	direct
MACS_peak_180	ACBD6	-13321	direct
MACS_peak_1860	ABCA12	463	direct
MACS_peak_1896	PCNA	6442	direct
MACS_peak_1917	CD93	-14242	direct
MACS_peak_1928	CBFA2T2	-4709	direct
MACS_peak_1931	GDF5	3309	direct
MACS_peak_1981	BTG3	4952	direct
MACS_peak_1992	PCBP3	-10755	direct
MACS_peak_2000	DERL3	12715	direct
MACS_peak_2011	LIF	964	direct
MACS_peak_2101	CMTM7	15569	direct
MACS_peak_2107	TRANK1	11997	direct
MACS_peak_2109	ACKR2	14075	direct
MACS_peak_2113	PLXNB1	-3242	direct
MACS_peak_2173	ALCAM	5737	direct
MACS_peak_2186	GSK3B	7005	direct
MACS_peak_2187	GOLGB1	18225	direct
MACS_peak_2188	KPNA1	18263	direct
MACS_peak_2214	GPR87	871	direct
MACS_peak_2216	RAP2B	-1440	direct
MACS_peak_2223	SCHIP1	-10136	direct
MACS_peak_2236	ZMAT3	2082	direct
MACS_peak_2242	RTP1	-14103	direct
MACS_peak_2256	TCTEX1D2	-1963	direct
MACS_peak_2269	CRMP1	-19730	direct
MACS_peak_2308	OCIAD1	13854	direct
MACS_peak_2309	SPATA18	636	direct
MACS_peak_2326	UTP3	12985	direct
MACS_peak_2336	MRPL1	18483	direct
MACS_peak_2414	FAM198B	1685	direct
MACS_peak_244	PHLDA3	19	direct
MACS_peak_2471	GDNF	-12247	direct
MACS_peak_248	TMEM183A	-4709	direct
MACS_peak_250	MDM4	8672	direct
MACS_peak_254	FCAMR	8716	direct
MACS_peak_258	HHAT	-7196	direct
MACS_peak_2587	FST	10468	direct
MACS_peak_2592	MAP3K1	5383	direct
MACS_peak_2596	PLK2	-2024	direct
MACS_peak_260	ATF3	-12098	direct
MACS_peak_2619	ENC1	-5890	direct
MACS_peak_2700	STARD4	17719	direct
MACS_peak_2786	CNOT8	19928	direct
MACS_peak_2799	CCNG1	354	direct
MACS_peak_2813	NEURL1B	-4084	direct
MACS_peak_2815	CPEB4	-3896	direct
MACS_peak_284	COG2	-14523	direct
MACS_peak_2840	SSR1	-10115	direct
MACS_peak_2843	TMEM14C	-4070	direct
MACS_peak_2846	CD83	-11968	direct
MACS_peak_286	IRF2BP2	-9065	direct
MACS_peak_2867	HLA-B	19845	direct
MACS_peak_2869	VPS52	17072	direct
MACS_peak_2880	TMEM217	12610	direct
MACS_peak_2887	TREML2	11166	direct
MACS_peak_2926	PTP4A1	1709	direct
MACS_peak_296	ADARB2	12340	direct
MACS_peak_30	PTPRU	2912	direct
MACS_peak_3003	ASCC3	434	direct
MACS_peak_3011	PRDM1	12272	direct
MACS_peak_3018	SLC16A10	19667	direct
MACS_peak_3019	REV3L	-436	direct
MACS_peak_3034	PKIB	-12218	direct
MACS_peak_3044	C6orf58	9333	direct
MACS_peak_3067	TAB2	15733	direct
MACS_peak_3068	MTHFD1L	-8193	direct
MACS_peak_3098	SCIN	-13071	direct
MACS_peak_3130	STK17A	-5411	direct
MACS_peak_3139	COBL	-8519	direct
MACS_peak_3161	SEMA3C	7765	direct
MACS_peak_3165	CROT	-14548	direct
MACS_peak_3172	SLC25A13	-8226	direct
MACS_peak_3176	CYP3A7	-2813	direct
MACS_peak_320	VIM	19229	direct
MACS_peak_3241	GALNT11	-1700	direct
MACS_peak_3256	ENSG00000250210	-14120	direct
MACS_peak_3281	SLC18A1	7549	direct
MACS_peak_3286	TNFRSF10B	547	direct
MACS_peak_3330	TMEM67	-3617	direct
MACS_peak_3342	RRM2B	2269	direct
MACS_peak_3343	UBR5	-14336	direct
MACS_peak_3402	FER1L6	-7018	direct
MACS_peak_3434	GML	-18961	direct
MACS_peak_3440	DGAT1	14439	direct
MACS_peak_3441	TONSL	-3977	direct
MACS_peak_349	ZNF488	-12090	direct
MACS_peak_3551	OR1N2	-1567	direct
MACS_peak_3558	QRFP	7620	direct
MACS_peak_3571	RNF224	-1440	direct
MACS_peak_3598	ZNF81	-17734	direct
MACS_peak_3602	EDA2R	319	direct
MACS_peak_362	CDK1	-17576	direct
MACS_peak_3628	PASD1	-19689	direct
MACS_peak_3631	FAM3A	-10567	direct
MACS_peak_386	PTEN	-19838	direct
MACS_peak_390	ACTA2	73	direct
MACS_peak_399	PI4K2A	11241	direct
MACS_peak_416	KCNK18	19553	direct
MACS_peak_43	EDN2	2253	direct
MACS_peak_449	OR52K2	15140	direct
MACS_peak_464	KCNJ11	9783	direct
MACS_peak_47	EBNA1BP2	19549	direct
MACS_peak_501	FADS1	-3165	direct
MACS_peak_517	FOSL1	1289	direct
MACS_peak_519	RBM14-RBM4	2822	direct
MACS_peak_521	ACY3	-5837	direct
MACS_peak_579	BTG4	1804	direct
MACS_peak_596	DCP1B	-149	direct
MACS_peak_620	AEBP2	-7645	direct
MACS_peak_645	CERS5	-3096	direct
MACS_peak_648	KRT80	15810	direct
MACS_peak_670	TAC3	-15052	direct
MACS_peak_693	MDM2	756	direct
MACS_peak_74	GADD45A	1723	direct
MACS_peak_770	CCDC41	-13499	direct
MACS_peak_791	ATP2A2	6568	direct
MACS_peak_801	TRIAP1	65	direct
MACS_peak_818	SFSWAP	9917	direct
MACS_peak_870	EDDM3A	6244	direct
MACS_peak_873	NYNRIN	-2296	direct
MACS_peak_882	AKAP6	16231	direct
MACS_peak_935	ACTN1	-9140	direct
MACS_peak_946	PGF	2581	direct
MACS_peak_970	SMEK1	613	direct
MACS_peak_972	ATXN3	3033	direct
MACS_peak_1380	SEPT9	4848	indirect
MACS_peak_1867	AAMP	2693	indirect
MACS_peak_1176	AARS	12498	indirect
MACS_peak_1365	ABCA5	8603	indirect
MACS_peak_465	ABCC8	5191	indirect
MACS_peak_2238	ABCF3	-4969	indirect
MACS_peak_3149	ABHD11	8794	indirect
MACS_peak_1289	ABI3	9678	indirect
MACS_peak_283	ACTA1	1757	indirect
MACS_peak_3089	ACTB	3217	indirect
MACS_peak_3090	ACTB	2203	indirect
MACS_peak_3091	ACTB	1525	indirect
MACS_peak_1391	ACTG1	2518	indirect
MACS_peak_1392	ACTG1	2103	indirect
MACS_peak_1393	ACTG1	1518	indirect
MACS_peak_1394	ACTG1	643	indirect
MACS_peak_912	ACTR10	-11062	indirect
MACS_peak_1406	ADCYAP1	1993	indirect
MACS_peak_384	ADIRF	531	indirect
MACS_peak_385	ADIRF	3984	indirect
MACS_peak_1534	ADM5	-436	indirect
MACS_peak_1459	AES	9454	indirect
MACS_peak_1687	AFF3	-15616	indirect
MACS_peak_3102	AGR2	3330	indirect
MACS_peak_996	AHNAK2	-4632	indirect
MACS_peak_3103	AHR	-1009	indirect
MACS_peak_953	AHSA1	1727	indirect
MACS_peak_3092	AIMP2	15280	indirect
MACS_peak_3209	AKR1B15	-3112	indirect
MACS_peak_555	ANKRD42	9836	indirect
MACS_peak_602	ANO2	936	indirect
MACS_peak_2337	ANXA3	-6629	indirect
MACS_peak_1479	AP1M2	-1584	indirect
MACS_peak_1094	AP3B2	-10688	indirect
MACS_peak_3178	AP4M1	-5552	indirect
MACS_peak_3179	AP4M1	-2414	indirect
MACS_peak_869	APEX1	130	indirect
MACS_peak_1069	APH1B	9772	indirect
MACS_peak_1587	APOB	11700	indirect
MACS_peak_1325	APPBP2	-3878	indirect
MACS_peak_526	ARAP1	-2507	indirect
MACS_peak_492	ARFGAP2	10524	indirect
MACS_peak_2027	ARFGAP3	-11715	indirect
MACS_peak_2348	ARHGAP24	-16163	indirect
MACS_peak_2028	ARHGAP8	4988	indirect
MACS_peak_1399	ARHGDIA	2452	indirect
MACS_peak_3173	ARPC1B	13397	indirect
MACS_peak_3174	ARPC1B	15041	indirect
MACS_peak_1028	ARPP19	10884	indirect
MACS_peak_1029	ARPP19	-12227	indirect
MACS_peak_2627	ARSB	10673	indirect
MACS_peak_69	ATG4C	-385	indirect
MACS_peak_754	ATP2B1	-8347	indirect
MACS_peak_664	ATP5B	3254	indirect
MACS_peak_665	ATP5B	2552	indirect
MACS_peak_666	ATP5B	2123	indirect
MACS_peak_667	ATP5B	1155	indirect
MACS_peak_668	ATP5B	797	indirect
MACS_peak_1454	ATP5D	2540	indirect
MACS_peak_831	ATP5EP2	147	indirect
MACS_peak_653	ATP5G2	10968	indirect
MACS_peak_654	ATP5G2	7075	indirect
MACS_peak_1793	ATP5G3	-14316	indirect
MACS_peak_583	ATP5L	491	indirect
MACS_peak_1015	B2M	4030	indirect
MACS_peak_218	B3GALT2	-11410	indirect
MACS_peak_2821	B4GALT7	8876	indirect
MACS_peak_1532	BAX	236	indirect
MACS_peak_662	BAZ2A	-1924	indirect
MACS_peak_663	BAZ2A	-3723	indirect
MACS_peak_518	BBS1	-13311	indirect
MACS_peak_1774	BBS5	-573	indirect
MACS_peak_1775	BBS5	13694	indirect
MACS_peak_1327	BCAS3	8907	indirect
MACS_peak_2964	BCKDHB	-12540	indirect
MACS_peak_1995	BCL2L13	477	indirect
MACS_peak_976	BDKRB2	-3496	indirect
MACS_peak_403	BLOC1S2	547	indirect
MACS_peak_404	BLOC1S2	-5852	indirect
MACS_peak_440	BRSK2	-18380	indirect
MACS_peak_2181	BTLA	9255	indirect
MACS_peak_601	C12orf5	290	indirect
MACS_peak_609	C12orf57	-7291	indirect
MACS_peak_1257	C1QBP	5769	indirect
MACS_peak_2023	C22orf23	10540	indirect
MACS_peak_1832	C2orf66	-18255	indirect
MACS_peak_2531	C5orf28	-9544	indirect
MACS_peak_2532	C5orf28	-10788	indirect
MACS_peak_2533	C5orf28	-13208	indirect
MACS_peak_2470	C5orf42	421	indirect
MACS_peak_3077	C6orf120	6926	indirect
MACS_peak_2475	C9	3562	indirect
MACS_peak_3565	C9orf69	10227	indirect
MACS_peak_3566	C9orf69	9006	indirect
MACS_peak_1296	CA10	1229	indirect
MACS_peak_1114	CACNA1H	-8483	indirect
MACS_peak_322	CACNB2	9088	indirect
MACS_peak_580	CADM1	155	indirect
MACS_peak_1181	CALB2	12475	indirect
MACS_peak_3210	CALD1	-7773	indirect
MACS_peak_406	CALHM2	11837	indirect
MACS_peak_968	CALM1	126	indirect
MACS_peak_1525	CALM3	8566	indirect
MACS_peak_1484	CALR	965	indirect
MACS_peak_373	CAMK2G	-13371	indirect
MACS_peak_243	CAMSAP2	-12163	indirect
MACS_peak_119	CASQ2	17622	indirect
MACS_peak_971	CATSPERB	16544	indirect
MACS_peak_1384	CBX2	3703	indirect
MACS_peak_1800	CCDC141	11300	indirect
MACS_peak_769	CCDC41	-12576	indirect
MACS_peak_556	CCDC90B	6175	indirect
MACS_peak_397	CCNJ	-14751	indirect
MACS_peak_696	CCT2	11899	indirect
MACS_peak_2953	CD109	-6249	indirect
MACS_peak_1147	CD19	-1447	indirect
MACS_peak_255	CD55	15876	indirect
MACS_peak_657	CD63	3523	indirect
MACS_peak_658	CD63	2494	indirect
MACS_peak_1284	CDC27	-45	indirect
MACS_peak_511	CDC42BPG	1458	indirect
MACS_peak_1275	CDK12	9656	indirect
MACS_peak_2877	CDKN1A	-1270	indirect
MACS_peak_2433	CDKN2AIP	8786	indirect
MACS_peak_494	CELF1	-4380	indirect
MACS_peak_2032	CELSR1	-5446	indirect
MACS_peak_436	CEND1	1837	indirect
MACS_peak_130	CERS2	9021	indirect
MACS_peak_1772	CERS6	-3099	indirect
MACS_peak_514	CFL1	4309	indirect
MACS_peak_515	CFL1	3700	indirect
MACS_peak_516	CFL1	3306	indirect
MACS_peak_1162	CHD9	-2305	indirect
MACS_peak_973	CHGA	15977	indirect
MACS_peak_109	CHI3L2	13695	indirect
MACS_peak_1203	CHST5	15064	indirect
MACS_peak_990	CINP	15192	indirect
MACS_peak_1198	CLEC18B	-10214	indirect
MACS_peak_2898	CLIC5	-148	indirect
MACS_peak_1319	CLTC	-8424	indirect
MACS_peak_2982	CNR1	-8646	indirect
MACS_peak_2045	CNTN4	13037	indirect
MACS_peak_2041	CNTN6	-19238	indirect
MACS_peak_3545	CNTRL	1246	indirect
MACS_peak_285	COA6	-16860	indirect
MACS_peak_2941	COL19A1	8884	indirect
MACS_peak_42	COL9A2	3621	indirect
MACS_peak_459	COPB1	11863	indirect
MACS_peak_3177	COPS6	5309	indirect
MACS_peak_1238	COX4I1	7183	indirect
MACS_peak_1506	COX7A1	2827	indirect
MACS_peak_2954	COX7A2	-5770	indirect
MACS_peak_510	COX8A	1803	indirect
MACS_peak_2282	CPEB2	-1363	indirect
MACS_peak_1854	CPS1	5228	indirect
MACS_peak_149	CRABP2	5727	indirect
MACS_peak_3116	CREB5	9756	indirect
MACS_peak_2261	CRIPAK	-12618	indirect
MACS_peak_2262	CRIPAK	4823	indirect
MACS_peak_2906	CRISP2	-1394	indirect
MACS_peak_400	CRTAC1	-4356	indirect
MACS_peak_1421	CTAGE1	9608	indirect
MACS_peak_3525	CTNNAL1	-16887	indirect
MACS_peak_443	CTSD	6595	indirect
MACS_peak_444	CTSD	4908	indirect
MACS_peak_445	CTSD	4476	indirect
MACS_peak_446	CTSD	2599	indirect
MACS_peak_2604	CWC27	16013	indirect
MACS_peak_60	CYB5RL	988	indirect
MACS_peak_3435	CYP11B1	-5530	indirect
MACS_peak_3080	CYP2W1	14338	indirect
MACS_peak_1569	CYS1	-11055	indirect
MACS_peak_1461	DAPK3	-5100	indirect
MACS_peak_1462	DAPK3	-5539	indirect
MACS_peak_1463	DAPK3	-6290	indirect
MACS_peak_1464	DAPK3	-6918	indirect
MACS_peak_1706	DBI	1026	indirect
MACS_peak_1707	DBI	5070	indirect
MACS_peak_493	DDB2	118	indirect
MACS_peak_2864	DDR1	7983	indirect
MACS_peak_2024	DDX17	-17025	indirect
MACS_peak_2951	DDX43	5273	indirect
MACS_peak_1357	DDX5	3537	indirect
MACS_peak_806	DDX55	-5327	indirect
MACS_peak_536	DGAT2	-13109	indirect
MACS_peak_489	DGKZ	-16189	indirect
MACS_peak_2630	DHFR	-4254	indirect
MACS_peak_76	DIRAS3	964	indirect
MACS_peak_2116	DNAH1	-5995	indirect
MACS_peak_2356	DNAJB14	-1593	indirect
MACS_peak_331	DNAJC1	13274	indirect
MACS_peak_659	DNAJC14	4769	indirect
MACS_peak_641	DNAJC22	5973	indirect
MACS_peak_171	DNM3	2746	indirect
MACS_peak_610	DPPA3	-6345	indirect
MACS_peak_780	DRAM1	171	indirect
MACS_peak_1895	DTYMK	10902	indirect
MACS_peak_1929	DYNLRB1	-8313	indirect
MACS_peak_1512	DYRK1B	-5471	indirect
MACS_peak_717	E2F7	-386	indirect
MACS_peak_718	E2F7	-4850	indirect
MACS_peak_48	EBNA1BP2	7829	indirect
MACS_peak_1971	EDN3	14127	indirect
MACS_peak_1976	EEF1A2	4181	indirect
MACS_peak_506	EEF1G	1342	indirect
MACS_peak_1465	EEF2	6092	indirect
MACS_peak_1466	EEF2	5509	indirect
MACS_peak_1467	EEF2	4944	indirect
MACS_peak_1468	EEF2	4500	indirect
MACS_peak_1469	EEF2	4129	indirect
MACS_peak_1471	EEF2	3183	indirect
MACS_peak_1472	EEF2	2393	indirect
MACS_peak_1473	EEF2	1233	indirect
MACS_peak_3296	EFCAB1	2059	indirect
MACS_peak_2910	EFHC1	4279	indirect
MACS_peak_783	EID3	15238	indirect
MACS_peak_1280	EIF1	46	indirect
MACS_peak_3084	EIF3B	9587	indirect
MACS_peak_2019	EIF3D	8835	indirect
MACS_peak_2020	EIF3D	6185	indirect
MACS_peak_452	EIF4G2	10737	indirect
MACS_peak_453	EIF4G2	8333	indirect
MACS_peak_454	EIF4G2	7798	indirect
MACS_peak_455	EIF4G2	7437	indirect
MACS_peak_456	EIF4G2	4829	indirect
MACS_peak_983	EML1	19228	indirect
MACS_peak_1523	EML2	12967	indirect
MACS_peak_9	ENO1	15401	indirect
MACS_peak_10	ENO1	14689	indirect
MACS_peak_11	ENO1	13316	indirect
MACS_peak_12	ENO1	11485	indirect
MACS_peak_13	ENO1	36	indirect
MACS_peak_3615	ENOX2	2415	indirect
MACS_peak_129	ENSA	7228	indirect
MACS_peak_1453	ENSG00000129951	10361	indirect
MACS_peak_2529	ENSG00000177453	-14230	indirect
MACS_peak_2530	ENSG00000177453	15993	indirect
MACS_peak_638	ENSG00000255863	-382	indirect
MACS_peak_1247	ENSG00000258947	11920	indirect
MACS_peak_1073	ENSG00000259316	7734	indirect
MACS_peak_1258	ENSG00000262302	35	indirect
MACS_peak_1507	ENSG00000267748	-5417	indirect
MACS_peak_1508	ENSG00000267748	1052	indirect
MACS_peak_1509	ENSG00000267748	2976	indirect
MACS_peak_1550	ENSG00000269545	14851	indirect
MACS_peak_1879	EPHA4	-14688	indirect
MACS_peak_435	EPS8L2	861	indirect
MACS_peak_3505	ERP44	19043	indirect
MACS_peak_3332	ESRP1	16406	indirect
MACS_peak_1538	ETFB	2868	indirect
MACS_peak_3288	EXTL3	-6282	indirect
MACS_peak_490	F2	158	indirect
MACS_peak_3624	F9	13402	indirect
MACS_peak_2239	FAM131A	-10130	indirect
MACS_peak_61	FAM151A	11985	indirect
MACS_peak_2283	FAM200B	-343	indirect
MACS_peak_3093	FAM220A	4632	indirect
MACS_peak_3024	FAM26F	-4239	indirect
MACS_peak_1443	FAM69C	-6542	indirect
MACS_peak_2790	FAM71B	-6329	indirect
MACS_peak_3495	FANCC	-13024	indirect
MACS_peak_1401	FASN	12574	indirect
MACS_peak_1089	FBXO22	183	indirect
MACS_peak_2556	FGF10	-8898	indirect
MACS_peak_3630	FLNA	19643	indirect
MACS_peak_929	FNTB	18990	indirect
MACS_peak_524	FOLR3	-3073	indirect
MACS_peak_947	FOS	14871	indirect
MACS_peak_3500	FOXE1	-1610	indirect
MACS_peak_597	FOXM1	17907	indirect
MACS_peak_3014	FOXO3	10337	indirect
MACS_peak_502	FTH1	-13682	indirect
MACS_peak_433	FUOM	-4787	indirect
MACS_peak_1149	FUS	10197	indirect
MACS_peak_344	FZD8	233	indirect
MACS_peak_3502	GABBR2	1992	indirect
MACS_peak_2070	GALNT15	-6967	indirect
MACS_peak_603	GAPDH	-12831	indirect
MACS_peak_604	GAPDH	3913	indirect
MACS_peak_605	GAPDH	4347	indirect
MACS_peak_308	GATA3	3665	indirect
MACS_peak_309	GATA3	19205	indirect
MACS_peak_1016	GATM	-6075	indirect
MACS_peak_1396	GCGR	-1912	indirect
MACS_peak_1494	GDF15	3628	indirect
MACS_peak_1581	GEN1	2954	indirect
MACS_peak_3117	GGCT	7930	indirect
MACS_peak_380	GHITM	3315	indirect
MACS_peak_381	GHITM	5547	indirect
MACS_peak_1934	GHRH	12959	indirect
MACS_peak_2985	GJA10	-19833	indirect
MACS_peak_1199	GLG1	-19367	indirect
MACS_peak_1710	GLI2	6556	indirect
MACS_peak_217	GLRX2	833	indirect
MACS_peak_498	GLYATL2	13859	indirect
MACS_peak_107	GNAI3	17722	indirect
MACS_peak_1996	GNB1L	-13970	indirect
MACS_peak_3180	GNB2	4736	indirect
MACS_peak_2829	GNB2L1	6012	indirect
MACS_peak_2830	GNB2L1	4660	indirect
MACS_peak_2831	GNB2L1	2628	indirect
MACS_peak_2832	GNB2L1	1924	indirect
MACS_peak_2833	GNB2L1	371	indirect
MACS_peak_35	GNL2	9240	indirect
MACS_peak_949	GPATCH2L	-7813	indirect
MACS_peak_950	GPATCH2L	19631	indirect
MACS_peak_863	GPC6	622	indirect
MACS_peak_2899	GPR110	8610	indirect
MACS_peak_2818	GPRIN1	16704	indirect
MACS_peak_1400	GPS1	3236	indirect
MACS_peak_2115	GPX1	-1416	indirect
MACS_peak_1081	GRAMD2	-1603	indirect
MACS_peak_1082	GRAMD2	-4729	indirect
MACS_peak_1083	GRAMD2	-9086	indirect
MACS_peak_1084	GRAMD2	-10931	indirect
MACS_peak_1276	GRB7	11453	indirect
MACS_peak_2328	GRSF1	6713	indirect
MACS_peak_952	GSTZ1	-399	indirect
MACS_peak_1918	GZF1	17630	indirect
MACS_peak_2022	H1F0	257	indirect
MACS_peak_615	H2AFJ	355	indirect
MACS_peak_585	H2AFX	1328	indirect
MACS_peak_2573	HCN1	-6459	indirect
MACS_peak_3532	HDHD3	-1074	indirect
MACS_peak_3055	HEBP2	8781	indirect
MACS_peak_85	HFM1	17462	indirect
MACS_peak_2264	HGFAC	-4970	indirect
MACS_peak_2858	HIST1H4A	285	indirect
MACS_peak_3108	HNRNPA2B1	8491	indirect
MACS_peak_3109	HNRNPA2B1	7440	indirect
MACS_peak_3110	HNRNPA2B1	4850	indirect
MACS_peak_3111	HNRNPA2B1	4214	indirect
MACS_peak_3112	HNRNPA2B1	3784	indirect
MACS_peak_3113	HNRNPA2B1	3345	indirect
MACS_peak_3114	HNRNPA2B1	3054	indirect
MACS_peak_3115	HNRNPA2B1	71	indirect
MACS_peak_2342	HNRNPD	14375	indirect
MACS_peak_292	HNRNPU	637	indirect
MACS_peak_64	HOOK1	-17506	indirect
MACS_peak_655	HOXC4	-8698	indirect
MACS_peak_2006	HSCB	9823	indirect
MACS_peak_3600	HSD17B10	2776	indirect
MACS_peak_2892	HSP90AB1	-706	indirect
MACS_peak_2893	HSP90AB1	3282	indirect
MACS_peak_2894	HSP90AB1	4293	indirect
MACS_peak_928	HSPA2	518	indirect
MACS_peak_2754	HSPA9	8752	indirect
MACS_peak_3154	HSPB1	420	indirect
MACS_peak_3155	HSPB1	3841	indirect
MACS_peak_606	IFFO1	3934	indirect
MACS_peak_442	IFITM10	-2837	indirect
MACS_peak_652	IGFBP6	-5559	indirect
MACS_peak_3632	IKBKG	-10721	indirect
MACS_peak_3633	IKBKG	-10440	indirect
MACS_peak_3634	IKBKG	-6944	indirect
MACS_peak_3137	IKZF1	-15748	indirect
MACS_peak_690	IL22	-3502	indirect
MACS_peak_1177	IL34	-14778	indirect
MACS_peak_1178	IL34	-8000	indirect
MACS_peak_1179	IL34	17	indirect
MACS_peak_2591	IL6ST	10115	indirect
MACS_peak_2114	IMPDH2	2616	indirect
MACS_peak_993	INF2	13516	indirect
MACS_peak_2012	INPP5J	-15238	indirect
MACS_peak_1248	INPP5K	-3586	indirect
MACS_peak_73	INSL5	-15623	indirect
MACS_peak_2777	IRGM	8103	indirect
MACS_peak_2778	IRGM	8350	indirect
MACS_peak_2195	ISY1	-9216	indirect
MACS_peak_1786	ITGA6	2179	indirect
MACS_peak_307	ITIH5	-7938	indirect
MACS_peak_2791	ITK	-1099	indirect
MACS_peak_195	IVNS1ABP	10940	indirect
MACS_peak_1491	JUND	-4919	indirect
MACS_peak_1281	JUP	19313	indirect
MACS_peak_68	KANK4	19240	indirect
MACS_peak_1535	KCNC3	8672	indirect
MACS_peak_1235	KCNG4	8786	indirect
MACS_peak_2766	KCTD16	-14763	indirect
MACS_peak_2950	KHDC1	-4741	indirect
MACS_peak_1651	KIAA1841	-19728	indirect
MACS_peak_2752	KIF20A	5032	indirect
MACS_peak_1301	KIF2B	-18608	indirect
MACS_peak_1741	KIF5C	-3572	indirect
MACS_peak_1285	KPNB1	7127	indirect
MACS_peak_1278	KRT15	-1832	indirect
MACS_peak_651	KRT18	327	indirect
MACS_peak_1279	KRT19	283	indirect
MACS_peak_1734	KYNU	12294	indirect
MACS_peak_608	LAG3	-1917	indirect
MACS_peak_3046	LAMA2	7	indirect
MACS_peak_1604	LBH	19354	indirect
MACS_peak_1420	LDLRAD4	-11606	indirect
MACS_peak_71	LEPR	11653	indirect
MACS_peak_1542	LILRB3	-6568	indirect
MACS_peak_2014	LIMK2	5707	indirect
MACS_peak_734	LIN7A	-19787	indirect
MACS_peak_388	LIPF	-7400	indirect
MACS_peak_3252	LMBR1	-15823	indirect
MACS_peak_146	LMNA	9153	indirect
MACS_peak_697	LRRC10	11341	indirect
MACS_peak_2755	LRRTM2	5990	indirect
MACS_peak_2067	LSM3	181	indirect
MACS_peak_2221	LXN	6134	indirect
MACS_peak_3436	LY6E	3015	indirect
MACS_peak_3391	MAL2	13241	indirect
MACS_peak_2824	MAML1	-12338	indirect
MACS_peak_2825	MAML1	-9094	indirect
MACS_peak_2826	MAML1	-4037	indirect
MACS_peak_3031	MAN1A1	11865	indirect
MACS_peak_2237	MAP6D1	-5024	indirect
MACS_peak_2034	MAPK11	-16198	indirect
MACS_peak_1116	MAPK8IP3	-4957	indirect
MACS_peak_3150	MDH2	9988	indirect
MACS_peak_3151	MDH2	12352	indirect
MACS_peak_3152	MDH2	15503	indirect
MACS_peak_3153	MDH2	16344	indirect
MACS_peak_1696	MERTK	10693	indirect
MACS_peak_1783	METAP1D	-9903	indirect
MACS_peak_164	METTL11B	-12332	indirect
MACS_peak_165	METTL11B	12363	indirect
MACS_peak_21	MFAP2	14394	indirect
MACS_peak_2400	MGST2	11522	indirect
MACS_peak_2868	MICA	-13099	indirect
MACS_peak_2001	MIF	490	indirect
MACS_peak_23	MINOS1	71	indirect
MACS_peak_1743	MMADHC	-1194	indirect
MACS_peak_1664	MOB1A	-9575	indirect
MACS_peak_2177	MORC1	-9463	indirect
MACS_peak_3606	MORF4L2	9973	indirect
MACS_peak_183	MR1	11597	indirect
MACS_peak_2270	MRFAP1	2299	indirect
MACS_peak_1489	MRI1	13665	indirect
MACS_peak_150	MRPL24	-3988	indirect
MACS_peak_1582	MSGN1	-633	indirect
MACS_peak_830	MTIF3	-9172	indirect
MACS_peak_839	MTRF1	-1807	indirect
MACS_peak_438	MUC2	-1126	indirect
MACS_peak_439	MUC2	-346	indirect
MACS_peak_437	MUC6	14419	indirect
MACS_peak_819	MUC8	-3642	indirect
MACS_peak_1938	MYBL2	19827	indirect
MACS_peak_1407	MYL12B	15618	indirect
MACS_peak_661	MYL6	3288	indirect
MACS_peak_2822	N4BP3	-6379	indirect
MACS_peak_911	NAA30	16199	indirect
MACS_peak_671	NAB2	7445	indirect
MACS_peak_669	NACA	15178	indirect
MACS_peak_1333	NACA2	-13386	indirect
MACS_peak_3	NADK	-7652	indirect
MACS_peak_2419	NAF1	15640	indirect
MACS_peak_418	NANOS1	12395	indirect
MACS_peak_542	NARS2	-7840	indirect
MACS_peak_1377	NAT9	12883	indirect
MACS_peak_1378	NAT9	7605	indirect
MACS_peak_1889	NCL	9077	indirect
MACS_peak_1890	NCL	4350	indirect
MACS_peak_1891	NCL	2670	indirect
MACS_peak_2888	NCR2	-11330	indirect
MACS_peak_1051	NEDD4	-10459	indirect
MACS_peak_1941	NEURL2	-7198	indirect
MACS_peak_1804	NEUROD1	246	indirect
MACS_peak_2010	NF2	19647	indirect
MACS_peak_1450	NFATC1	-2405	indirect
MACS_peak_3487	NFIL3	-18172	indirect
MACS_peak_1975	NKAIN4	-1507	indirect
MACS_peak_431	NKX6-2	16277	indirect
MACS_peak_1294	NME2	2132	indirect
MACS_peak_1118	NME3	-517	indirect
MACS_peak_2315	NMU	-6482	indirect
MACS_peak_2535	NNT	-5374	indirect
MACS_peak_2021	NOL12	2890	indirect
MACS_peak_3489	NOL8	7801	indirect
MACS_peak_2817	NOP16	-4128	indirect
MACS_peak_607	NOP2	-9751	indirect
MACS_peak_1842	NOP58	8269	indirect
MACS_peak_3567	NOTCH1	-4803	indirect
MACS_peak_1169	NQO1	15871	indirect
MACS_peak_1170	NQO1	13858	indirect
MACS_peak_1171	NQO1	11898	indirect
MACS_peak_1172	NQO1	8742	indirect
MACS_peak_1173	NQO1	8489	indirect
MACS_peak_1174	NQO1	425	indirect
MACS_peak_771	NR2C1	-3935	indirect
MACS_peak_647	NR4A1	18953	indirect
MACS_peak_413	NRAP	5766	indirect
MACS_peak_117	NRAS	-840	indirect
MACS_peak_118	NRAS	-13622	indirect
MACS_peak_3439	NRBP2	4435	indirect
MACS_peak_54	NSUN4	16622	indirect
MACS_peak_2976	NT5E	6234	indirect
MACS_peak_1455	OAZ1	80	indirect
MACS_peak_1456	OAZ1	2328	indirect
MACS_peak_1457	OAZ1	3526	indirect
MACS_peak_434	ODF3	4002	indirect
MACS_peak_2860	OR12D3	17571	indirect
MACS_peak_3552	OR1B1	-5379	indirect
MACS_peak_3550	OR1J2	-11285	indirect
MACS_peak_3528	OR2K2	1408	indirect
MACS_peak_1313	OR4D2	-5803	indirect
MACS_peak_2169	OR5K3	-745	indirect
MACS_peak_656	OR6C6	3982	indirect
MACS_peak_1841	ORC2	-18472	indirect
MACS_peak_3107	OSBPL3	8809	indirect
MACS_peak_1796	OSBPL6	5018	indirect
MACS_peak_1287	OSBPL7	14189	indirect
MACS_peak_2624	OTP	-10206	indirect
MACS_peak_909	OTX2	-9184	indirect
MACS_peak_910	OTX2	-9476	indirect
MACS_peak_1395	OXLD1	-1157	indirect
MACS_peak_1398	P4HB	1436	indirect
MACS_peak_531	PAAF1	-3935	indirect
MACS_peak_39	PABPC4	621	indirect
MACS_peak_2534	PAIP1	-1672	indirect
MACS_peak_2759	PAIP2	-19822	indirect
MACS_peak_943	PAPLN	7852	indirect
MACS_peak_600	PARP11	-18823	indirect
MACS_peak_370	PCBD1	5013	indirect
MACS_peak_1658	PCBP1	509	indirect
MACS_peak_2762	PCDHB8	-1692	indirect
MACS_peak_1942	PCIF1	5075	indirect
MACS_peak_3175	PDAP1	-8707	indirect
MACS_peak_1254	PFN1	3213	indirect
MACS_peak_1255	PFN1	2233	indirect
MACS_peak_1256	PFN1	603	indirect
MACS_peak_2213	PFN2	5717	indirect
MACS_peak_533	PGM2L1	-16652	indirect
MACS_peak_3620	PHF6	-11531	indirect
MACS_peak_3569	PHPT1	382	indirect
MACS_peak_360	PHYHIPL	2390	indirect
MACS_peak_2879	PI16	14247	indirect
MACS_peak_111	PIFO	18429	indirect
MACS_peak_1085	PKM	12347	indirect
MACS_peak_2500	PLCXD3	13611	indirect
MACS_peak_2501	PLCXD3	-5705	indirect
MACS_peak_2502	PLCXD3	-10657	indirect
MACS_peak_51	PLK3	-241	indirect
MACS_peak_257	PLXNA2	710	indirect
MACS_peak_2035	PLXNB2	1531	indirect
MACS_peak_1434	PMAIP1	-229	indirect
MACS_peak_147	PMF1-BGLAP	3647	indirect
MACS_peak_3589	POLA1	-12996	indirect
MACS_peak_1356	POLG2	-3153	indirect
MACS_peak_2891	POLH	66	indirect
MACS_peak_3183	POLR2J	5287	indirect
MACS_peak_3171	PON3	-17974	indirect
MACS_peak_36	POU3F1	4159	indirect
MACS_peak_1692	POU3F3	2922	indirect
MACS_peak_738	PPFIA2	-11594	indirect
MACS_peak_249	PPFIA4	12554	indirect
MACS_peak_1072	PPIB	3067	indirect
MACS_peak_1316	PPM1E	-7366	indirect
MACS_peak_1317	PPM1E	14251	indirect
MACS_peak_1597	PPM1G	14137	indirect
MACS_peak_520	PPP1CA	2985	indirect
MACS_peak_794	PPP1CC	12347	indirect
MACS_peak_1397	PPP1R27	-11509	indirect
MACS_peak_925	PPP2R5E	7346	indirect
MACS_peak_2361	PPP3CA	643	indirect
MACS_peak_1148	PPP4C	-5788	indirect
MACS_peak_41	PPT1	5260	indirect
MACS_peak_1288	PRAC	2329	indirect
MACS_peak_1477	PRAM1	14284	indirect
MACS_peak_2341	PRDM8	17880	indirect
MACS_peak_52	PRDX1	10710	indirect
MACS_peak_53	PRDX1	6189	indirect
MACS_peak_174	PRDX6	10537	indirect
MACS_peak_1698	PSD4	-51	indirect
MACS_peak_913	PSMA3	7387	indirect
MACS_peak_1091	PSMA4	8505	indirect
MACS_peak_131	PSMB4	-7262	indirect
MACS_peak_132	PSMB4	497	indirect
MACS_peak_133	PSMB4	1777	indirect
MACS_peak_134	PSMB4	2065	indirect
MACS_peak_1252	PSMB6	1929	indirect
MACS_peak_2121	PSMD6	13028	indirect
MACS_peak_1197	PSMD7	114	indirect
MACS_peak_1510	PSMD8	293	indirect
MACS_peak_2890	PTK7	19877	indirect
MACS_peak_1558	PXDN	17296	indirect
MACS_peak_1480	QTRT1	-17981	indirect
MACS_peak_401	R3HCC1L	-5384	indirect
MACS_peak_1596	RAB10	14453	indirect
MACS_peak_701	RAB21	11821	indirect
MACS_peak_1486	RAD23A	-2096	indirect
MACS_peak_637	RAPGEF3	10959	indirect
MACS_peak_1788	RAPGEF4	-10594	indirect
MACS_peak_3585	RBBP7	16117	indirect
MACS_peak_1599	RBKS	-6373	indirect
MACS_peak_3549	RBM18	-10817	indirect
MACS_peak_350	RBP3	8980	indirect
MACS_peak_259	RD3	2523	indirect
MACS_peak_1112	RHBDF1	3723	indirect
MACS_peak_114	RHOC	11517	indirect
MACS_peak_1751	RIF1	-4609	indirect
MACS_peak_1249	RILP	-9832	indirect
MACS_peak_3319	RMDN1	10346	indirect
MACS_peak_3612	RNF113A	-175	indirect
MACS_peak_535	RNF169	13823	indirect
MACS_peak_1314	RNF43	-9217	indirect
MACS_peak_2872	RPL10A	567	indirect
MACS_peak_25	RPL11	883	indirect
MACS_peak_26	RPL11	2030	indirect
MACS_peak_27	RPL11	2937	indirect
MACS_peak_28	RPL11	4040	indirect
MACS_peak_1246	RPL13	2511	indirect
MACS_peak_1431	RPL17-C18orf32	-124	indirect
MACS_peak_1544	RPL28	703	indirect
MACS_peak_3335	RPL30	3767	indirect
MACS_peak_3336	RPL30	2796	indirect
MACS_peak_3337	RPL30	541	indirect
MACS_peak_2492	RPL37	837	indirect
MACS_peak_1863	RPL37A	3174	indirect
MACS_peak_87	RPL5	52	indirect
MACS_peak_3560	RPL7A	1857	indirect
MACS_peak_3442	RPL8	2122	indirect
MACS_peak_3443	RPL8	1204	indirect
MACS_peak_3444	RPL8	551	indirect
MACS_peak_1078	RPLP1	120	indirect
MACS_peak_1533	RPS11	912	indirect
MACS_peak_2776	RPS14	2877	indirect
MACS_peak_1519	RPS19	507	indirect
MACS_peak_2633	RPS23	737	indirect
MACS_peak_3453	RPS6	3681	indirect
MACS_peak_3454	RPS6	1787	indirect
MACS_peak_3455	RPS6	1410	indirect
MACS_peak_50	RPS8	1250	indirect
MACS_peak_509	RTN3	8098	indirect
MACS_peak_135	S100A10	11184	indirect
MACS_peak_139	S100A14	2248	indirect
MACS_peak_140	S100A14	1143	indirect
MACS_peak_138	S100A16	2005	indirect
MACS_peak_512	SAC3D1	394	indirect
MACS_peak_1449	SALL3	-6902	indirect
MACS_peak_3570	SAPCD2	-2021	indirect
MACS_peak_94	SASS6	12263	indirect
MACS_peak_3073	SCAF8	9443	indirect
MACS_peak_646	SCN8A	-12829	indirect
MACS_peak_3438	SCRIB	-2553	indirect
MACS_peak_154	SDHC	19798	indirect
MACS_peak_1096	SEC11A	-5879	indirect
MACS_peak_405	SEMA4G	6112	indirect
MACS_peak_2520	SEPP1	1024	indirect
MACS_peak_1013	SERF2	1563	indirect
MACS_peak_1437	SERPINB5	-119	indirect
MACS_peak_1514	SERTAD1	-102	indirect
MACS_peak_1515	SERTAD3	-3252	indirect
MACS_peak_1833	SF3B1	-5410	indirect
MACS_peak_32	SFPQ	8704	indirect
MACS_peak_2773	SH3TC2	-12683	indirect
MACS_peak_1536	SHANK1	2924	indirect
MACS_peak_3251	SHH	-934659	indirect
MACS_peak_1537	SIGLEC7	19068	indirect
MACS_peak_994	SIVA1	16519	indirect
MACS_peak_1526	SLC1A5	1158	indirect
MACS_peak_774	SLC25A3	2162	indirect
MACS_peak_775	SLC25A3	7781	indirect
MACS_peak_984	SLC25A47	10751	indirect
MACS_peak_3388	SLC30A8	-9834	indirect
MACS_peak_2895	SLC35B2	3889	indirect
MACS_peak_1871	SLC4A3	11230	indirect
MACS_peak_2093	SLC4A7	5941	indirect
MACS_peak_3318	SLC7A13	-19555	indirect
MACS_peak_1375	SLC9A3R1	117	indirect
MACS_peak_1376	SLC9A3R1	13407	indirect
MACS_peak_3433	SLURP1	5706	indirect
MACS_peak_2025	SMDT1	2303	indirect
MACS_peak_2970	SNAP91	4708	indirect
MACS_peak_1075	SNAPC5	-1711	indirect
MACS_peak_1524	SNRPD2	3858	indirect
MACS_peak_1553	SNTG2	-13273	indirect
MACS_peak_2977	SNX14	-17535	indirect
MACS_peak_1070	SNX22	1992	indirect
MACS_peak_1071	SNX22	5113	indirect
MACS_peak_884	SNX6	19877	indirect
MACS_peak_2981	SPACA1	16440	indirect
MACS_peak_3625	SPANXC	-15020	indirect
MACS_peak_2760	SPATA24	-7617	indirect
MACS_peak_1014	SPG11	18020	indirect
MACS_peak_1531	SPHK2	-2544	indirect
MACS_peak_2771	SPINK5	8864	indirect
MACS_peak_136	SPRR2D	3159	indirect
MACS_peak_1017	SQRDL	-12109	indirect
MACS_peak_2316	SRP72	-7142	indirect
MACS_peak_2874	SRSF3	14013	indirect
MACS_peak_1613	SRSF7	1881	indirect
MACS_peak_1113	SSTR5	-16738	indirect
MACS_peak_2	SSU72	17004	indirect
MACS_peak_591	ST14	-16088	indirect
MACS_peak_527	STARD10	12560	indirect
MACS_peak_1947	STAU1	17322	indirect
MACS_peak_2873	STK38	-2586	indirect
MACS_peak_3553	STRBP	-10383	indirect
MACS_peak_3557	STXBP1	11220	indirect
MACS_peak_1945	SULF2	1643	indirect
MACS_peak_3561	SURF4	8744	indirect
MACS_peak_1543	SUV420H2	4944	indirect
MACS_peak_447	SYT8	-3597	indirect
MACS_peak_49	SZT2	11974	indirect
MACS_peak_153	TAGLN2	7208	indirect
MACS_peak_612	TAS2R42	15622	indirect
MACS_peak_2625	TBCA	-8793	indirect
MACS_peak_1121	TCEB2	7093	indirect
MACS_peak_598	TEAD4	-16512	indirect
MACS_peak_1521	TEX101	4644	indirect
MACS_peak_2842	TFAP2A	3081	indirect
MACS_peak_1988	TFF1	3233	indirect
MACS_peak_1997	THAP7	-2932	indirect
MACS_peak_1458	THOP1	6527	indirect
MACS_peak_1270	TIAF1	-8172	indirect
MACS_peak_2117	TKT	-14110	indirect
MACS_peak_3541	TLR4	1443	indirect
MACS_peak_1885	TM4SF20	12033	indirect
MACS_peak_1541	TMC4	1267	indirect
MACS_peak_805	TMED2	-16629	indirect
MACS_peak_2615	TMEM174	-15248	indirect
MACS_peak_1383	TMEM235	-8111	indirect
MACS_peak_2955	TMEM30A	12861	indirect
MACS_peak_2252	TMEM44	14533	indirect
MACS_peak_2253	TMEM44	-8026	indirect
MACS_peak_582	TMPRSS4	8837	indirect
MACS_peak_742	TMTC2	17437	indirect
MACS_peak_3287	TNFRSF10C	681	indirect
MACS_peak_1123	TNFRSF12A	1621	indirect
MACS_peak_3535	TNFSF8	-10317	indirect
MACS_peak_2263	TNIP2	9549	indirect
MACS_peak_3333	TP53INP1	-267	indirect
MACS_peak_3037	TPD52L1	19265	indirect
MACS_peak_703	TPH2	-2694	indirect
MACS_peak_1115	TPSG1	19368	indirect
MACS_peak_842	TPT1	282	indirect
MACS_peak_3358	TRHR	-18390	indirect
MACS_peak_450	TRIM22	970	indirect
MACS_peak_1309	TRIM25	11926	indirect
MACS_peak_3540	TRIM32	0	indirect
MACS_peak_907	TRIM9	-12287	indirect
MACS_peak_194	TRMT1L	11632	indirect
MACS_peak_1897	TRMT6	9954	indirect
MACS_peak_3601	TRO	7295	indirect
MACS_peak_790	TRPV4	6230	indirect
MACS_peak_193	TSEN15	19309	indirect
MACS_peak_1990	TSPEAR	1603	indirect
MACS_peak_639	TUBA1B	3432	indirect
MACS_peak_640	TUBA1B	29	indirect
MACS_peak_821	TUBA3C	3567	indirect
MACS_peak_1869	TUBA4A	3531	indirect
MACS_peak_1870	TUBA4A	2900	indirect
MACS_peak_2862	TUBB	317	indirect
MACS_peak_2863	TUBB	3538	indirect
MACS_peak_3572	TUBB4B	782	indirect
MACS_peak_1418	TUBB6	17252	indirect
MACS_peak_1405	TYMS	672	indirect
MACS_peak_3452	TYRP1	3530	indirect
MACS_peak_1495	UBA52	3253	indirect
MACS_peak_141	UBAP2L	13841	indirect
MACS_peak_1264	UBB	1108	indirect
MACS_peak_1940	UBE2C	-1081	indirect
MACS_peak_2812	UBTD2	-12568	indirect
MACS_peak_1475	UBXN6	11158	indirect
MACS_peak_802	UNC119B	-8881	indirect
MACS_peak_2819	UNC5A	1091	indirect
MACS_peak_1497	UPF1	8644	indirect
MACS_peak_3131	URGCP	5682	indirect
MACS_peak_1505	USF2	-6587	indirect
MACS_peak_1547	USP29	-969	indirect
MACS_peak_432	UTF1	-4783	indirect
MACS_peak_96	VCAM1	7030	indirect
MACS_peak_148	VHLL	-12518	indirect
MACS_peak_128	VPS45	-16811	indirect
MACS_peak_2241	VPS8	6506	indirect
MACS_peak_500	VWCE	-8533	indirect
MACS_peak_2300	WDR19	-15384	indirect
MACS_peak_3254	WDR60	-1709	indirect
MACS_peak_2007	XBP1	5392	indirect
MACS_peak_2008	XBP1	4500	indirect
MACS_peak_29	XKR8	12315	indirect
MACS_peak_611	YBX3	5427	indirect
MACS_peak_1481	YIPF2	13624	indirect
MACS_peak_3132	YKT6	11311	indirect
MACS_peak_945	YLPM1	13007	indirect
MACS_peak_1998	YPEL1	-17668	indirect
MACS_peak_232	ZBTB41	-16219	indirect
MACS_peak_1474	ZBTB7A	-16706	indirect
MACS_peak_144	ZBTB7B	1074	indirect
MACS_peak_145	ZBTB7B	14812	indirect
MACS_peak_1527	ZC3H4	-5670	indirect
MACS_peak_933	ZFP36L1	-8209	indirect
MACS_peak_1168	ZFP90	584	indirect
MACS_peak_822	ZMYM5	-12246	indirect
MACS_peak_2527	ZNF131	15336	indirect
MACS_peak_1539	ZNF28	-17751	indirect
MACS_peak_1062	ZNF280D	7186	indirect
MACS_peak_3236	ZNF282	-16217	indirect
MACS_peak_1921	ZNF337	-9291	indirect
MACS_peak_2823	ZNF354B	5267	indirect
MACS_peak_1483	ZNF442	-13810	indirect
MACS_peak_3237	ZNF467	-4404	indirect
MACS_peak_1548	ZNF550	6012	indirect
MACS_peak_1520	ZNF574	-239	indirect
MACS_peak_46	ZNF691	2274	indirect
MACS_peak_123	ZNF697	16106	indirect
MACS_peak_3445	ZNF7	-10864	indirect
MACS_peak_1549	ZNF776	6464	indirect
MACS_peak_1807	ZNF804A	19472	indirect
MACS_peak_1202	ZNRF1	1761	indirect
