# Supplementary material for: Multiplex enhancer-reporter assays uncover unsophisticated TP53 enhancer logic
Source: HighWire-hosted journal article supplement (doi:10.1101/gr.204149.116), 2016-05-18
Supplement: Supplemental_Tables_S1-S5andS8.zip [file Supplemental_Table_S8.xlsx]

## Sheet: Sheet1
site	gene	distance
chr1-12700300-12701200	AADACL4	-3830
chr2-69875200-69876100	AAK1	-4827
chr2-216002200-216003100	ABCA12	463
chr1-180490900-180491800	ACBD6	-19231
chr1-180485000-180485800	ACBD6	-13321
chr3-42864600-42865500	ACKR2	14075
chr10-90750600-90751500	ACTA2	73
chr14-69454700-69455500	ACTN1	-9140
chr11-67423500-67424400	ACY3	-5837
chr14-70913700-70914600	ADAM21	-4740
chr17-15866800-15867700	ADORA2B	19025
chr10-112816500-112817400	ADRA2A	-19847
chr5-148205300-148206200	ADRB2	-415
chr12-19584500-19585400	AEBP2	-7645
chr15-89164100-89165000	AEN	19
chr2-228331300-228332100	AGFG1	-5171
chr9-4743000-4743800	AK3	-2077
chr17-19889900-19890700	AKAP10	-9158
chr14-32814300-32815200	AKAP6	16231
chr7-134230600-134231500	AKR1B15	-2836
chr19-40807900-40808800	AKT2	-17022
chr3-105091000-105091900	ALCAM	5737
chr15-101417400-101418300	ALDH1A3	-1720
chr17-19656200-19657100	ALDH3A1	-7878
chr17-66244300-66245200	AMZ2	1073
chr22-39492900-39493700	APOBEC3H	24
chr10-49797200-49798100	ARHGAP22	15331
chr19-933100-934000	ARID3A	7578
chr2-153557500-153558300	ARL6IP6	-16521
chr17-42230000-42231400	ASB16	-17617
chr6-101328400-101329200	ASCC3	434
chr18-31140400-31141300	ASXL3	-17739
chr1-212769500-212770400	ATF3	-12098
chr14-92569500-92570400	ATXN3	3033
chr19-47734100-47735000	BBC3	1438
chr19-47735400-47736300	BBC3	189
chr19-53798100-53799000	BIRC8	-3654
chr21-18979800-18980700	BTG3	4952
chr11-111380800-111381700	BTG4	1804
chr17-79213200-79214100	C17orf89	625
chr6-127907200-127908100	C6orf58	9333
chr1-223895500-223896400	CAPN2	-4063
chr20-32145000-32145900	CBFA2T2	-4709
chr12-94866800-94867700	CCDC41	-13499
chr7-45073200-45074100	CCM2	7015
chr5-162864500-162865300	CCNG1	354
chr14-99950200-99951100	CCNK	2929
chr19-6577200-6578100	CD70	13549
chr6-14105500-14106300	CD83	-11968
chr2-37881000-37881900	CDC42EP3	17916
chr10-62520200-62521100	CDK1	-17576
chr6-36650000-36650900	CDKN1A	3943
chr6-36634600-36635400	CDKN1A	-11443
chr6-36643800-36645500	CDKN1A	-2252
chr2-65295600-65296500	CEP68	12565
chr12-50563900-50564700	CERS5	-3096
chr2-169309000-169309900	CERS6	-3279
chr16-53085700-53087000	CHD9	-2760
chr1-111756800-111757700	CHI3L2	13877
chr8-42606800-42607700	CHRNA6	16705
chr3-190043500-190044400	CLDN1	-3698
chr21-36047300-36048100	CLIC6	6008
chr18-604500-605400	CLUL1	7965
chr3-32448300-32449200	CMTM7	15569
chr5-154257300-154258200	CNOT8	19928
chr1-234528600-234529500	COA6	19633
chr7-51392600-51393500	COBL	-8519
chr1-230763300-230764200	COG2	-14523
chr5-173310900-173311800	CPEB4	-3896
chr4-5914100-5915000	CRMP1	-19730
chr7-86960000-86960900	CROT	-14548
chr7-86973600-86974400	CROT	-1007
chr5-149507500-149508300	CSF1R	-15027
chr1-85051200-85052100	CTBS	-11517
chr7-99335100-99336000	CYP3A7	-2813
chr19-16003200-16004300	CYP4F2	5284
chr19-15757000-15758000	CYP4F3	5898
chr17-76787900-76788800	CYTH1	-9960
chr12-2113500-2114300	DCP1B	-149
chr22-24168000-24168900	DERL3	12715
chr14-24100800-24101600	DHRS2	-4358
chr6-116673500-116674400	DSE	-17568
chr6-305500-306300	DUSP22	13755
chr6-159053500-159054400	DYNLT1	11804
chr1-206820200-206821100	DYRK3	11759
chr1-43618300-43619100	EBNA1BP2	19549
chrX-65858100-65859000	EDA2R	319
chr14-21219900-21220700	EDDM3A	6250
chr1-41947700-41948500	EDN2	2253
chr19-3981700-3982600	EEF2	3335
chr15-49159900-49160800	EID1	-9733
chr5-49719000-49719900	EMB	17771
chr5-73942700-73943600	ENC1	-5890
chr8-120632800-120633700	ENPP2	17842
chr8-164200-165100	ENSG00000250210	-14120
chr15-59457700-59458600	ENSG00000268327	18218
chr1-16478600-16479500	EPHA2	3549
chr7-158611200-158612100	ESYT2	10664
chr6-680400-681300	EXOC2	12271
chr11-61587400-61588200	FADS1	-3165
chr15-80460500-80461400	FAH	15798
chr8-53458600-53459500	FAM150A	18987
chr3-122112800-122113700	FAM162A	10186
chr4-159092200-159093000	FAM198B	1685
chr12-62586400-62587300	FAM19A2	-234
chr1-179007900-179008800	FAM20B	13329
chrX-153754700-153755600	FAM3A	-10567
chr2-16833900-16834800	FAM49A	12735
chr1-207134800-207135700	FCAMR	8716
chr5-72250700-72251600	FCHO2	-692
chr8-124856800-124857600	FER1L6	-7018
chr10-123370200-123371100	FGFR2	-12735
chr2-106020400-106021300	FHL2	-5198
chr11-65666300-65667100	FOSL1	1289
chr16-86545500-86546300	FOXF1	1826
chr16-86535700-86536600	FOXF1	-7951
chr5-52786300-52787100	FST	10468
chr1-68152000-68152900	GADD45A	1723
chr7-151769200-151770100	GALNT11	-1700
chr17-10108700-10109600	GAS7	-7255
chr2-109061400-109062300	GCC2	-3153
chr19-18475400-18476200	GDF15	-17173
chr19-18484300-18485200	GDF15	-8214
chr20-34038800-34039700	GDF5	3309
chr5-37847700-37848600	GDNF	-12247
chr8-143896800-143897700	GML	-18961
chr7-79780100-79781000	GNAI1	16422
chr3-121449900-121450800	GOLGB1	18225
chr14-66970000-66970800	GPHN	-3715
chr4-176936100-176937000	GPM6A	-13099
chr3-151033400-151034300	GPR87	871
chr2-43022900-43023800	HAAO	-3594
chr4-89376200-89377100	HERC5	-1597
chr1-210494600-210495500	HHAT	-7196
chr6-31304700-31305600	HLA-B	19845
chr4-128704200-128705100	HSPA4L	1378
chr1-22282100-22282900	HSPG2	-18720
chr19-10396400-10397300	ICAM4	-796
chr19-46636400-46637300	IGFL3	-8910
chr1-207046900-207047800	IL20	8627
chr16-27419800-27420700	IL21R	6799
chr1-67612000-67612900	IL23R	-19632
chr1-234753900-234754800	IRF2BP2	-9065
chr6-380800-381600	IRF4	-10557
chr15-74437600-74438500	ISLR2	16346
chr16-31284800-31285700	ITGAM	13941
chr11-17400000-17400900	KCNJ11	9783
chr10-118976100-118977000	KCNK18	19553
chr19-44286700-44287500	KCNN4	-1699
chr3-122215100-122215900	KPNA1	18269
chr12-52569500-52570400	KRT80	15810
chr21-46013600-46014400	KRTAP10-6	-1622
chr21-46017600-46018500	KRTAP10-7	-2479
chr1-31220700-31221600	LAPTM5	9532
chr10-102981200-102981900	LBX1	8050
chr19-39265800-39266700	LGALS7	-2134
chr22-30641400-30642300	LIF	964
chr12-59300500-59301300	LRIG3	13400
chr8-20175000-20175900	LZTS1	-13962
chr17-67426300-67427200	MAP2K6	15938
chr2-102320200-102321100	MAP4K4	6142
chr12-69202300-69203200	MDM2	756
chr1-204493700-204494600	MDM4	8672
chr1-204478300-204479100	MDM4	-6813
chr12-51321900-51322800	METTL7A	5079
chr2-172287300-172288200	METTL8	2878
chr16-4675600-4676500	MGRN1	1240
chr6-31358000-31359100	MICA	-12894
chr6-31454900-31456000	MICB	-10515
chr5-52418600-52419500	MOCS2	-13495
chr1-113229800-113230600	MOV10	13148
chr4-78801700-78802600	MRPL1	18483
chr8-121449900-121450800	MRPL13	7301
chr17-48448700-48449500	MRPL27	1466
chr12-6616500-6617400	MRPL51	-14219
chr6-151178000-151178900	MTHFD1L	-8193
chr2-171031800-171032700	MYO3B	-2429
chr11-17391100-17392000	NCR3LG1	18300
chr20-13781100-13782000	NDUFAF5	15966
chr22-29864700-29865500	NEFH	-11190
chr5-172063700-172064600	NEURL1B	-4084
chr16-68125300-68126200	NFATC3	6205
chr9-33296200-33297000	NFX1	6090
chr1-116381600-116382500	NHLH2	4494
chr17-43124400-43125200	NMT1	-4176
chr3-119512600-119513400	NR1I2	11451
chr2-206534800-206535600	NRP2	-12014
chr1-205718700-205719500	NUCKS1	309
chr11-4485200-4486100	OR52K2	15140
chr16-30961200-30962100	ORAI3	1282
chr1-17636000-17636800	PADI4	1707
chr10-91405000-91405500	PANK1	193
chr20-3874200-3874700	PANK2	4514
chrX-150712000-150712800	PASD1	-19689
chr21-47052400-47053300	PCBP3	-10755
chr20-5100400-5101300	PCNA	6442
chr1-144986600-144987300	PDE4DIP	8043
chr21-45146400-45147300	PDXK	7848
chr14-75419500-75420300	PGF	2581
chr12-76408700-76409600	PHLDA1	18575
chr1-201437900-201438700	PHLDA3	19
chr10-99411200-99412100	PI4K2A	11241
chr11-804000-804900	PIDD	823
chr1-111907100-111908000	PIFO	18666
chr1-20459800-20460700	PLA2G2F	-5565
chr19-30159100-30159900	PLEKHF1	3530
chr5-57757700-57758600	PLK2	-2024
chr3-48473700-48474600	PLXNB1	-3242
chr17-74547000-74547800	PRCD	11197
chr6-106546000-106546900	PRDM1	12272
chr9-80903200-80904000	PSAT1	-8468
chr18-43649200-43650100	PSTPIP2	2547
chr10-89602600-89603500	PTEN	-19838
chr6-64283200-64284100	PTP4A1	1709
chr1-29565500-29566400	PTPRU	2912
chr3-152878100-152879000	RAP2B	-1440
chr11-66386500-66387400	RBM14-RBM4	2822
chr1-17769700-17770600	RCC2	-3913
chr6-111804900-111805800	REV3L	-436
chr19-14123100-14124000	RFX1	-6439
chr15-56532400-56533200	RFX7	2690
chr1-113246100-113247000	RHOC	3201
chr9-94725900-94726700	ROR2	-13868
chr15-63449400-63449900	RPS27L	558
chr1-152140000-152140900	RPTN	-8727
chr16-66961600-66962400	RRAD	-2449
chr8-103248600-103249500	RRM2B	2269
chr3-186900700-186901600	RTP1	-14098
chr1-25298500-25299400	RUNX3	-7465
chr1-153539700-153540500	S100A2	-1805
chr1-153498400-153499200	S100A6	9923
chr1-109740400-109741200	SARS	-15742
chr5-77641300-77642200	SCAMP1	-14558
chr11-61990100-61991000	SCGB2A1	14376
chr3-159547100-159548000	SCHIP1	-10136
chr7-12596800-12597700	SCIN	-13071
chr7-80540500-80541300	SEMA3C	7765
chr12-132205200-132206000	SFSWAP	9917
chr16-67999800-68000700	SLC12A4	2322
chr6-111428000-111428900	SLC16A10	19667
chr7-95959200-95960100	SLC25A13	-8226
chr1-211750300-211751200	SLC30A1	1364
chr1-95302200-95303100	SLC44A3	16730
chr1-41472400-41473100	SLFNL1	16121
chr14-91975400-91976300	SMEK1	613
chr1-227910900-227911800	SNAP47	-11307
chr2-174847500-174848400	SP3	-17504
chr4-52917700-52918600	SPATA18	636
chr15-44937600-44938500	SPG11	17854
chr2-73120900-73121800	SPR	6860
chr14-70179600-70180500	SRSF5	-13593
chr6-7323100-7324000	SSR1	-10115
chr3-186640400-186641200	ST6GAL1	-7465
chr5-110830100-110830900	STARD4	17719
chr2-119975600-119976500	STEAP3	-5335
chr19-1210200-1211000	STK11	4860
chr7-43616800-43617700	STK17A	-5411
chr2-108980800-108981700	SULT1C4	-13195
chr6-149657500-149658400	TAB2	15733
chr12-57424900-57425800	TAC3	-15052
chr2-27387900-27388800	TCF23	16474
chr2-88837600-88838500	TEX37	13842
chr5-135369200-135370100	TGFBI	5084
chr18-71816900-71817700	TIMM21	1559
chr12-27165600-27166400	TM7SF3	1333
chr12-124051800-124052700	TMED2	-16838
chr6-10718600-10719500	TMEM14C	-4070
chr1-202971400-202972200	TMEM183A	-4709
chr6-37212300-37213200	TMEM217	12610
chr6-75981600-75982500	TMEM30A	12625
chr8-94763000-94763900	TMEM67	-3617
chr8-22925700-22926600	TNFRSF10B	547
chr8-145673400-145674200	TONSL	-3977
chr8-80980400-80981300	TPD52	12172
chr17-27069700-27070600	TRAF4	-829
chr3-36974100-36975000	TRANK1	11997
chr6-41157300-41158200	TREML2	11166
chr12-120883700-120884600	TRIAP1	65
chr11-5711400-5712200	TRIM22	871
chr1-115071600-115072500	TRIM33	-18286
chr6-25958600-25959500	TRIM38	-3944
chr8-67036200-67037100	TRIM55	-2447
chr8-67025400-67026300	TRIM55	-13261
chr15-31442600-31443500	TRPM1	10418
chr12-110258500-110259400	TRPV4	-6251
chr10-82230600-82231400	TSPAN14	17069
chr18-12309700-12310600	TUBB6	2076
chr8-103439000-103439800	UBR5	-14336
chr4-71566700-71567600	UTP3	12985
chr1-171723300-171724200	VAMP4	-12329
chr10-17289000-17290500	VIM	19229
chr7-55641800-55642700	VOPP1	-1993
chr6-33222200-33223000	VPS52	17072
chr11-61064800-61065700	VWCE	-2365
chr4-39168400-39169300	WDR19	-15135
chr4-6266200-6267100	WFS1	-4965
chr3-13932000-13932900	WNT7A	-10858
chr12-10869700-10870600	YBX3	5732
chr5-132372200-132373100	ZCCHC10	-10351
chr3-178787500-178788400	ZMAT3	2082
chr10-43136000-43136900	ZNF33B	-2501
chr10-48342500-48343400	ZNF488	-12090
chr19-56112300-56113200	ZNF524	-463
chr19-9732300-9733900	ZNF561	-646
chrX-47678100-47679000	ZNF81	-17734
